# Supplementary material for: World Scientists’ Warning to Humanity: A Second Notice
Source: Oxford University Press journal article supplement (doi:10.1093/biosci/bix125), 2017-10-10
Supplement: bix125_supp.zip [file bix125_supp.zip]

## Supplemental File S2

For the article **“World Scientists’ Warning to Humanity: A Second Notice”** published in BioScience in 2017 by William J. Ripple, Christopher Wolf, Mauro Galetti, Thomas M Newsome, Mohammed Alamgir, Eileen Crist, Mahmoud I. Mahmoud, William F. Laurance and **15,364 signatories from 184 countries**

**Contents:** List of signatories: Pages 1-595

|                                                                                                             |                                                                                                                                              |                                                                                                                                                         |
|-------------------------------------------------------------------------------------------------------------|----------------------------------------------------------------------------------------------------------------------------------------------|---------------------------------------------------------------------------------------------------------------------------------------------------------|
| A. Falih, Haider<br>Geochemistry<br>Nature Iraq Organization<br>Iraq                                        | A. N. N. Agra, Leandro *<br>Universidade de Brasília<br>Brazil                                                                               | A.B. Almeida, Eduardo<br>Assistant Professor of Zoology<br>Universidade de Sao Paulo, FFCLRP/USP<br>Brazil                                              |
| Aardema, Hedy Maria<br>Netherlands (the)                                                                    | ABACIOGLU, Hakan<br>Dean<br>Izmir University of Economics School of Medicine<br>Turkey                                                       | Abad, Juan<br>Researcher and PhD Student / Ecology<br>Mato Grosso State University<br>Brazil                                                            |
| Abade, Leandro *<br>University of Oxford<br>United Kingdom of Great Britain and Northern Ireland (the)      | ABADIE, Eric<br>Researcher<br>IFREMER<br>France                                                                                              | Abarca, Mariana<br>Post doctoral fellow<br>Georgetown University<br>United States of America (the)                                                      |
| Abate, Maria<br>Assistant Professor of Biology<br>Simmons College<br>United States of America (the)         | Abayomi, Felix *<br>Zoologist/Wildlife Management and Conservation<br>Professional<br>Wildlife of Africa Conservation Initiative<br>Nigeria  | Abazajian, Kevork<br>Professor of Physics & Astronomy<br>University of California, Irvine<br>United States of America (the)                             |
| Abazova, Nade<br>EMBL<br>Germany                                                                            | Abbas, Sawaid<br>Postdoc - Remote Sensing<br>The Hong Kong Polytechnic University<br>Hong Kong                                               | Abbes, Ahmed *<br>Directeur de recherche<br>CNRS<br>France                                                                                              |
| Abbink, Jon<br>Professor, Anthropology<br>Leiden University<br>Netherlands (the)                            | Abbott, Brett<br>Landscape Ecologist<br>Australia                                                                                            | Abd Khalid, Dr Siti Salwa<br>Education Officer for Biodiversity and Environmental<br>Research<br>Institute for Biodiversity and Environmental Research, |
| Abdala, Virginia<br>Scientific researcher<br>Insituto de Biodiversidad Neotropical UNT-CONICET<br>Argentina | Abdallah, Mohamad<br>PhD Student<br>University of the Balearic Islands<br>Spain                                                              | Abdelaal, Mohamed<br>PhD<br>Faculty of Science- Mansoura University<br>Egypt                                                                            |
| Abdel-Azeem, Ahmed<br>Assistant Professor<br>Faculty of Science, Suez Canal University<br>Egypt             | Abdel-Rahman, Sherif<br>Associate Professor/Environmental Toxicology<br>University of Texas Medical Branch<br>United States of America (the) | Abdul Aziz, Sheema<br>Rimba<br>Malaysia                                                                                                                 |

\* indicates individual also signed 1992 Scientists' Warning to Humanity

|                                                                                                                               |                                                                                                                                                  |                                                                                                                                                                               |
|-------------------------------------------------------------------------------------------------------------------------------|--------------------------------------------------------------------------------------------------------------------------------------------------|-------------------------------------------------------------------------------------------------------------------------------------------------------------------------------|
| Abdullahi, Yusuf<br>Chemical Ecologist<br>University of Pretoria<br>South Africa                                              | Abel, Jae<br>Biologist<br>United States of America (the)                                                                                         | Abell, Guy<br>Associate research fellow<br>SAHMRI<br>Australia                                                                                                                |
| Abell, Sandra<br>Senior Research Fellow Ecology<br>James Cook University<br>Australia                                         | Abella-Gutiérrez, Jose Luis<br>postdoc / paleoclimate<br>University of Arizona<br>Spain                                                          | Abelson, Avigdor<br>Marine ecologist<br>Tel Aviv University<br>Israel                                                                                                         |
| Aben, Job<br>Researcher<br>University of Aberdeen<br>United Kingdom of Great Britain and Northern Ireland (the)               | Aberle-Malzahn, Nicole<br>Associate professor<br>Norwegian University of Science and Technology (NTNU)<br>Norway                                 | Abernethy, Katharine<br>Associate Professor of Tropical Ecology<br>University of Stirling<br>United Kingdom of Great Britain and Northern Ireland (the)                       |
| Abessa, Denis<br>Professor - Ecotoxicology and Environmental Sanitation<br>UNESP - São Paulo State University<br>Brazil       | Able, Kenneth<br>Professor Emeritus, Biological Sciences<br>University at Albany, State University of New York<br>United States of America (the) | Abolghasemi, Hamed *<br>Conservation project manager / Managing director<br>Persian Wildlife Heritage Foundation/Rafsanjan Nature<br>Custodians<br>Iran (Islamic Republic of) |
| Aboul-Hassan, Nadine<br>MSc student Biological Sciences<br>iCWILD, University of Cape Town<br>France                          | abozied, essam *<br>Ras Mohamed National Park Manager<br>Egypt                                                                                   | Abrahão, Vitor<br>Master<br>Museu de Zoologia da Universidade de São Paulo -<br>MZUSP<br>Brazil                                                                               |
| Abram, Nicola Karen<br>Co-Director<br>Living Landscape Alliance<br>United Kingdom of Great Britain and Northern Ireland (the) | Abramo, Luis Raul<br>Associate Professor<br>Physics Institute, University of São Paulo (USP)<br>Brazil                                           | Abramovay, Ricardo<br>Professor<br>University of Sao Paulo<br>Brazil                                                                                                          |
| Abrams, Kym<br>Postdoctoral Fellow, Zoology<br>University of Western Australia<br>Australia                                   | Abrams, Peter<br>Professor, Ecology & Evolutionary Biology<br>University of Toronto<br>Canada                                                    | Abrams, Ron<br>Principal Ecologist<br>Dru Associates Inc.<br>United States of America (the)                                                                                   |
| Abrantes, Joana<br>Biologist<br>CIBIO/InBIO, University of Porto<br>Portugal                                                  | Abreu, Paulo Cesar<br>Professor / Microbial Ecology<br>Federal University of Rio Grande<br>Brazil                                                | Abruna, Fernando<br>Architect<br>Abruna & Musgrave<br>Puerto Rico                                                                                                             |
| Abt, Fiona<br>Switzerland                                                                                                     | Abu Salim, Kamariah<br>Biologist<br>Recently retired from Universiti Brunei Darussalam<br>Brunei Darussalam                                      | Abubakr, Adnan<br>Assistant Professor of Limnology<br>Faculty of Fisheries, SKUAST-Kashmir<br>India                                                                           |

|                                                                                                                         |                                                                                                                     |                                                                                                                                                   |
|-------------------------------------------------------------------------------------------------------------------------|---------------------------------------------------------------------------------------------------------------------|---------------------------------------------------------------------------------------------------------------------------------------------------|
| Abugharqane, Mohammad<br>Scientific Diver/Researcher<br>Aqaba Marine Park<br>Jordan                                     | Accioly, Miguel<br>Professor of Coastal Management<br>Federal University of Bahia<br>Brazil                         | Acebes, Pablo<br>Assistant Professor, Ecology<br>Universidad Autónoma de Madrid<br>Spain                                                          |
| Acebey, Sandra<br>Biology<br>AEA<br>Bolivia (Plurinational State of)                                                    | Acevedo, Aldemar<br>Biologist, Ph.D studen<br>Pontificia Universidad Católica de Chile<br>Chile                     | Acevedo, Fernando<br>Posdoctoral Researcher, entomologist<br>Instituto Biología, Universidad Nacional Autónoma de México<br>Spain                 |
| Acevedo, Melissa J.<br>PhD in Marine Sciences<br>Institut de Ciències del Mar - CSIC<br>Spain                           | Acevedo, Paula<br>Professor of Biology<br>Universidad Autonoma de Madrid<br>Spain                                   | Acevedo García, Iván<br>Marine Biology<br>Museo Nacional de Ciencias Naturales, Consejo Superior de Investigaciones Científicas<br>Spain          |
| Acevedo-Charry, Orlando<br>BSc Biology, MSc Ecology<br>University of Puerto Rico - Río Piedras, Puerto Rico<br>Colombia | Acevedo-Whitehouse, Karina<br>Professor<br>Universidad Autonoma de Queretaro<br>Mexico                              | Aceves Medina, Gerardo<br>Researcher Profesor<br>Instituto Politécnico Nacional<br>Mexico                                                         |
| Achard, Frederic<br>Senior scientist in Environmental sciences<br>Italy                                                 | Acharjee, Dr. Shukla<br>Assistant Professor<br>Dibrugarh University<br>India                                        | Acharjee, Santanu<br>Assistant Professor, Economics and Computational Rationality Group, Department of Mathematics<br>Debraj Roy College<br>India |
| Acharya, Kamal Prasad<br>Norway                                                                                         | Acharya, Pushpa Raj<br>Senior Scientist, Biogical Research Unit<br>Nepal Acadamy of Science and Technology<br>Nepal | Achhami, Bishnu *<br>Researcher<br>Small Mammal Conservation and Research Foundation<br>Nepal                                                     |
| Achlatis, Michelle<br>PhD student in coral reef ecology<br>University of Queensland<br>Australia                        | Ackerman, Daniel<br>PhD Candidate<br>University of Minnesota<br>United States of America (the)                      | Ackerman-Morris, Shari<br>Instructor<br>Wheaton College, MA<br>United States of America (the)                                                     |
| Acosta, Alicia T. R.<br>Professor/Plant Ecology<br>University of Rome 3<br>Italy                                        | Acosta Martinez, Juan Pablo<br>Consultant<br>Sartorius Stedim Biotech<br>Mexico                                     | ACOSTA-GALLO, BELEN<br>PhD, Ecology. Assistant Professor<br>University Complutense of Madrid<br>Spain                                             |
| Acosta-Jamett, Gerardo<br>Director of Preventive Veterinary Medicine Institute<br>Universidad Austral de Chile<br>Chile | Acri, Dominic<br>Student of Neuroscience & Behavior<br>University of Notre Dame<br>United States of America (the)   | Acuña, Vicenç<br>Research scientist<br>Catalan Institute for Water Research<br>Spain                                                              |

|                                                                                                                                                                         |                                                                                                                               |                                                                                                                                                                           |
|-------------------------------------------------------------------------------------------------------------------------------------------------------------------------|-------------------------------------------------------------------------------------------------------------------------------|---------------------------------------------------------------------------------------------------------------------------------------------------------------------------|
| Adaïmé, Marc-Élie<br>Student-Researcher / Physical Geography-Paleolimnology<br>Laval University/Centre for Northern Studies<br>Canada                                   | Adams, Byron<br>Professor of Biology<br>Brigham Young University<br>United States of America (the)                            | Adams, Clare<br>United States of America (the)                                                                                                                            |
| Adams, Elena<br>Ecotoxicology<br>University of Koblenz-Landau<br>Germany                                                                                                | Adams, Fred<br>Professor of Physics<br>University of Michigan<br>United States of America (the)                               | Adams, Jennifer<br>Post-doctoral Fellow<br>University of Toronto<br>Canada                                                                                                |
| Adams, Thomas<br>Research Associate in Ecological Modelling<br>Scottish Association for Marine Science<br>United Kingdom of Great Britain and Northern Ireland<br>(the) | Adams, William<br>VP Strategy<br>RESTCO<br>Canada                                                                             | Addamo, Anna M<br>Marine Biology<br>European Commission Joint Research Centre Directorate<br>D - Sustainable Resources Unit D.02 - Water and Marine<br>Resources<br>Italy |
| Adelusi, Stephanie<br>Researcher/ Lecturer<br>Benue State University, Makurdi<br>Nigeria                                                                                | Adema, Frits<br>retired researcher<br>NBC Naturalis<br>Netherlands (the)                                                      | Adeshina, Ibrahim<br>Lecturer/Aquaculture and Fisheries<br>University of Ilorin, Ilorin<br>Nigeria                                                                        |
| Adhikari, Roshan<br>Graduate Research Assistant, Department of Applied<br>Economics<br>Oregon State University<br>United States of America (the)                        | Adhikari, Subodh<br>PhD Candidate<br>Montana State University<br>United States of America (the)                               | Adimassu, Zenebe<br>Researcher in water management<br>International water management institute<br>Ethiopia                                                                |
| Adjeroud, Mehdi<br>Research Director<br>French National Research Institute for Sustainable<br>Development (IRD)<br>France                                               | Adkins, Collette<br>Wildlife Conservation<br>Center for Biological Diversity<br>United States of America (the)                | Adler, Frederick<br>Professor of Mathematics and Biology<br>University of Utah<br>United States of America (the)                                                          |
| Adler, Kraig<br>Professor of Biology Emeritus<br>Cornell University<br>United States of America (the)                                                                   | Adler, Lynn<br>Professor<br>University of Massachusetts at Amherst<br>United States of America (the)                          | Adriaans, Jack<br>PhD Candidate: Environmental Biology<br>UTS - C3<br>Australia                                                                                           |
| Adriaens, Dominique<br>Professor in Biology<br>Ghent University<br>Belgium                                                                                              | Adrian, Rita<br>Climate Impact Research - Lakes<br>Leibniz Institute of Freshwater Ecology and Inland<br>Fisheries<br>Germany | Adua, Lazarus<br>Assistant Professor of Sociology<br>University of Utah<br>United States of America (the)                                                                 |

|                                                                                                                                                                           |                                                                                                                                                |                                                                                                                                 |
|---------------------------------------------------------------------------------------------------------------------------------------------------------------------------|------------------------------------------------------------------------------------------------------------------------------------------------|---------------------------------------------------------------------------------------------------------------------------------|
| Adu-Bredu, Stephen<br>Research Scientist<br>CSIR-FORESTRY Research Institute of Ghana<br>Ghana                                                                            | Adulcikas, John *<br>medical science<br>Utas<br>Australia                                                                                      | Aeby, Greta<br>marine biologist<br>University of Hawaii<br>United States of America (the)                                       |
| Aerts, Peter<br>Professor Biology (zoology)<br>University of Antwerp<br>Belgium                                                                                           | Aerts, Raf<br>Senior Researcher Health and Environment<br>Scientific Institute of Public Health<br>Belgium                                     | Affifi, Ramsey<br>Social Science / Education<br>University of Edinburgh<br>United Kingdom of Great Britain and Northern Ireland |
| Affinito, Flavio<br>Computational ecologist PG student<br>Imperial College of Science and Technology London<br>United Kingdom of Great Britain and Northern Ireland (the) | AFFOUARD, Antoine<br>R&D engineer in biodiversity informatics<br>INRIA<br>France                                                               | Afonso, Sandra<br>Portugal                                                                                                      |
| Afzal, Joshua *<br>Scientist Crop Sciences<br>Institute of Crop Sciences<br>Germany                                                                                       | Agathos, Spiros<br>Professor and Dean<br>Yachay Tech University<br>Ecuador                                                                     | Aggeli, Dimitra<br>postdoc genetics<br>Stanford, School of Medicine<br>United States of America (the)                           |
| Agha, Ramsy<br>Postdoctoral Researcher - Ecology<br>Leibniz Institute of freshwater Ecology and inland fisheries<br>Germany                                               | Aghtarafi, Natasha<br>Biologist<br>Swansea University<br>United Kingdom of Great Britain and Northern Ireland (the)                            | Agirreazkuenaga Onaindia, Irati<br>Lecturer<br>University of the Basque Country<br>Spain                                        |
| Agneray, Alison<br>PhD Student<br>University of Nevada, Reno<br>United States of America (the)                                                                            | AGOGLIA, ofelia *<br>INVESTIGADORA Y PROFESORA EN SOCIOLOGÍA<br>AMBIENTAL<br>UNIVERSIDAD NACIONAL DE CUYO<br>Argentina                         | AGOPIANTZ, MIKAEL *<br>PHYSICIAN<br>UNIVERSITY OF LORRAINE<br>France                                                            |
| Agostini, Sylvain<br>Assistant Professor/Marine Biology<br>University of Tsukuba<br>Japan                                                                                 | Agoulon, Albert<br>Maître de Conférences<br>Oniris - Nantes Atlantic College of Veterinary Medicine,<br>Food Science and Engineering<br>France | Ågren, Göran<br>Professor<br>Sweedish University of Agricultural Sciences<br>Sweden                                             |
| Aguado, Mateo<br>Professor of Ecology and Environment<br>Department of Geology, Escuela Politécnica Nacional<br>Ecuador                                                   | Agudelo, Gustavo<br>PhD Candidate<br>University of São Paulo<br>Brazil                                                                         | Agudo-Adriani, Esteban<br>Marine Biologist<br>Universidad Simón Bolívar<br>Venezuela (Bolivarian Republic of)                   |
| Aguero do Nascimento, Dênis<br>Technician. Hydrological research<br>National Institute of Amazonian Research<br>Brazil                                                    | Aguiar Borges, Ricardo<br>Forest Engineer<br>Society for Wildlife Research and Environmental<br>Education - SPVS<br>Brazil                     | Aguilar, Maria Constanza<br>Professor Psychology<br>Universidad Santotomas Colombia<br>Colombia                                 |

|                                                                                                                                                                                |                                                                                                                                                         |                                                                                                                                       |
|--------------------------------------------------------------------------------------------------------------------------------------------------------------------------------|---------------------------------------------------------------------------------------------------------------------------------------------------------|---------------------------------------------------------------------------------------------------------------------------------------|
| Aguilar, Ramiro<br>PhD Ecology<br>Instituto Multidisciplinario de Biología Vegetal, CONICET,<br>Universidad Nacional de Córdoba.<br>Argentina                                  | Aguilar, Roberto F<br>Veterinarian<br>Universidad Nacional Autonoma de Mexico<br>Mexico                                                                 | Aguilar Cabezas, Juan Pablo<br>Ecology and Evolutionary Biology Ph.D. Student<br>Ohio University<br>United States of America (the)    |
| Aguilera, Victoria<br>Psychology<br>Freelance<br>Venezuela (Bolivarian Republic of)                                                                                            | Aguirre, Luis F.<br>Director<br>Centro de Biodiversidad y Genética, UMSS<br>Bolivia (Plurinational State of)                                            | Aguirre, Omar<br>Director of Electrical Engineering<br>Universidad San Francisco de Quito (USFQ)<br>Ecuador                           |
| Aguirre Gutiérrez, Jesús<br>Postdoctoral researcher<br>University of Oxford and Naturalis Biodiversity Center<br>United Kingdom of Great Britain and Northern Ireland<br>(the) | Ahanamungu MAKELELE, Isaac<br>Junior researcher and teacher/ plant ecology<br>Université Officielle de Bukavu<br>Congo (the Democratic Republic of the) | Ahluwalia, Arti<br>professor of bioengineering<br>University of Pisa<br>Italy                                                         |
| Ahmad, Nariman<br>Plant Biotechnology<br>University of Sulaimani<br>Iraq                                                                                                       | Ahmed, Maqbool<br>Environmental Systems and Societies Teacher<br>Istanbul International Community School<br>Turkey                                      | Ahmed Salem, MOHAMED *<br>Chercheur<br>ESP Nouakchott<br>Mauritania                                                                   |
| AHMED, PhD, Monir Uddin<br>Executive Editor/Microbiology<br>Scientific Bangladesh<br>Bangladesh                                                                                | Ahrens, Dirk<br>Museum's curator (Entomology)<br>Zoologisches Forschungsmuseum A. Koenig, Bonn<br>Germany                                               | Ahrens, Theresa<br>Master Student Environmental Technology<br>Germany                                                                 |
| Aidar, Marcos Pereira Marinho<br>Research Scientist VI<br>Institute of Botany, São Paulo<br>Brazil                                                                             | Aiello, Christina<br>Ecology PhD Candidate<br>Pennsylvania State University<br>United States of America (the)                                           | Ainley, David<br>Senior Ecologist<br>HT Harvey & Associates Ecological Consultants<br>United States of America (the)                  |
| Airoidi, Laura<br>Associate Professor Ecology<br>University of Bologna<br>Italy                                                                                                | Aitken, Sally<br>Professor of Forestry<br>University of British Columbia<br>Canada                                                                      | Akama, Alberto<br>Biologist<br>Museu Paraense Emílio Goeldi<br>Brazil                                                                 |
| Akasaka, Munemitsu<br>Associate Professor<br>Tokyo University of Agriculture and Technology<br>Japan                                                                           | AKBAR, khalid Farooq<br>University Professor<br>The University of Lahore<br>Pakistan                                                                    | Akcakaya, Resit<br>Professor<br>Stony Brook University<br>United States of America (the)                                              |
| Akcay, Caglar<br>Research Scientist, Dept of Biological Sciences<br>Virginia Tech<br>United States of America (the)                                                            | Akdesir, Ezgi<br>Turkey                                                                                                                                 | Akhter, Sayma<br>Visiting Academic, Centre for Integrative Legume<br>Research<br>The University of Queensland, Australia<br>Australia |

|                                                                                                                                                |                                                                                                         |                                                                                                          |
|------------------------------------------------------------------------------------------------------------------------------------------------|---------------------------------------------------------------------------------------------------------|----------------------------------------------------------------------------------------------------------|
| Akimenko, Vitalii<br>Professor<br>Taras Shevchenko National University of Kyiv<br>Ukraine                                                      | Akirov, Ivan<br>Botanist<br>Argentina                                                                   | Alacid, Mónica<br>Master in enviromental Science<br>Universidad Austral de Chile<br>Chile                |
| Alameda, Aitor *<br>Biologist<br>Universidad Rey Juan Carlos (Móstoles)<br>Spain                                                               | Alameda, Inés F.<br>Técnico de investigación<br>UNIDAD MIXTA DE INVESTIGACIÓN EN BIODIVERSIDAD<br>Spain | Alaniz, Alberto<br>Researcher Spatial Ecology<br>Universidad de Chile<br>Chile                           |
| Alaniz, Ryan<br>Associate Professor of Sociology<br>California Polytechnic State University, San Luis Obispo<br>United States of America (the) | Alaniz Rodrigues, Marcos<br>Ecology professor. PhD<br>University of Rio Grande FURG<br>Brazil           | Alaoui, Omar<br>PhD Student in Environmental Science<br>LSCE<br>France                                   |
| Alarcon, Daniela<br>Biologist<br>Conselho Pastoral dos Pescadores<br>Brazil                                                                    | Alarcón, Marisa<br>Botanist<br>Institut Botànic de Barcelona (IBB-CSIC_ICUB)<br>Spain                   | Alarcón, Viviana<br>Master student / Ecology<br>University of Bremen<br>Colombia                         |
| Alarcón Vállora, María Remedios<br>IMIDRA<br>Spain                                                                                             | Alastuey, Andres<br>Spain                                                                               | Alat, Ceyda<br>Student / Biology<br>Science<br>Turkey                                                    |
| Alaux, Cedric<br>Research fellow<br>INRA<br>France                                                                                             | Álavarez-Campos, Patricia<br>Teaching Assistant<br>Universidad Autónoma de Madrid<br>Spain              | Alayon, Giraldo<br>Curador Invertebrados<br>Museo Nacional de Historia Natural de Cuba<br>Cuba           |
| Albaladejo, Rafael G.<br>Associate professor<br>Dpt. Biología Vegetal y Ecología. Universidad de Sevilla<br>Spain                              | Albaladejo Robles, Gonzalo<br>Conservation biology<br>University of La Laguna<br>Spain                  | Alba-Mejía, Lilian<br>Researcher<br>Universidad Nacional de Colombia<br>Colombia                         |
| Alba-Rovira, Roser<br>PhD Student on Translational medicine<br>IDIBAPS<br>Spain                                                                | Albaugh, Timothy<br>Research Associate / Forestry<br>Virginia Tech<br>United States of America (the)    | Alberdi, Maria<br>Research Professor AD HONOREM<br>Consejo Superior Investigaciones Científicas<br>Spain |
| Albernaz, Ana Luisa<br>Researcher/Ecology<br>Museu Paraense Emilio Goeldi<br>Brazil                                                            | Albers, P.C.H.<br>Scientific editor<br>Brill<br>Netherlands (the)                                       | Albert, Béatrice<br>Researcher<br>Paris-Sud University<br>France                                         |

|                                                                                                                                                              |                                                                                                                                            |                                                                                                                          |
|--------------------------------------------------------------------------------------------------------------------------------------------------------------|--------------------------------------------------------------------------------------------------------------------------------------------|--------------------------------------------------------------------------------------------------------------------------|
| Albert, Carlo<br>physicist<br>Switzerland                                                                                                                    | Albert, Céline<br>MSc graduated - Future PhD student<br>France                                                                             | Albert, James<br>Professor<br>University of Louisiana at Lafayette<br>United States of America (the)                     |
| Albert Navarro, Bruno<br>MSc. Student<br>Instituto de Biociências da Universidade de São Paulo<br>Brazil                                                     | Albert-Daviaud, Aurelie<br>Post-doc researcher<br>Royal Botanic Gardens, Kew<br>United Kingdom of Great Britain and Northern Ireland (the) | Alberthsen, Corinne<br>Scientific advisor - Animal welfare / epidemiology<br>Mater Research Institute<br>Australia       |
| Alberti, Giorgio<br>Professor of Silviculture<br>University of Udine<br>Italy                                                                                | Alberti, Juliana<br>Biologist<br>UNESP<br>Brazil                                                                                           | Alberto do Nascimento Ferreira, Sidney *<br>Research<br>Instituto Nacional de Pesquisas da Amazônia<br>Brazil            |
| Alberton, Bruna<br>Sao Paulo State University (UNESP)<br>Brazil                                                                                              | Alberts, Allison<br>Chief Conservation and Research Officer<br>San Diego Zoo Global<br>United States of America (the)                      | Albiach Branco, Evandro<br>Researcher<br>Earth System Science Center, National Space Research Institute (INPE)<br>Brazil |
| Albo Puigserver, Marta<br>PhD student at Renewable Marine Resources department, fish ecology<br>Institut of Marine Sciences of Barcelona (ICM-CSIC)<br>Spain | Albor, Xiana<br>Sustainability Advisor & Production Manager<br>Tamboura Films<br>Spain                                                     | Albores-Barajas, Yuri V.<br>Ecology and conservation of seabirds<br>CICESE Unidad La Paz<br>Mexico                       |
| Albre, Jérôme<br>Postdoctoral Research Fellow<br>Université de Corse<br>France                                                                               | Albrecht, Huguette<br>Sustainable LA Grand Challenge<br>University of California, Los Angeles<br>United States of America (the)            | Albrecht, Matthias<br>Researcher Agroecology<br>Agroscope<br>Switzerland                                                 |
| Albuquerque, Rui<br>Portugal                                                                                                                                 | Alcantara, Mark Jun<br>Xishuangbanna Tropical Botanical Garden, Chinese Academy of Sciences, China<br>Philippines (the)                    | Alcántara, Julio M.<br>Associate Professor in Ecology<br>University of Jaén<br>Spain                                     |
| Alcaraz, Miguel<br>Marine biologist<br>Institute of Marin Sciences, CSIC<br>Spain                                                                            | Alcaraz-Segura, Domingo<br>Professor<br>University of Granada<br>Spain                                                                     | Alciatore, Giacomo<br>PhD student in Ecology and Evolution<br>University of Lausanne<br>Switzerland                      |
| Alcorlo, Paloma<br>Associate Professor. Ecologist<br>Universidad Autónoma de Madrid<br>Spain                                                                 | Alcorn, Judith<br>Waste & Recycling and Biodiversity Coordinator<br>University of Melbourne<br>Australia                                   | Aldaba, Kyra Mari Dominique<br>Graduate Student<br>Ateneo de Manila University<br>Philippines (the)                      |



|                                                                                                                        |                                                                                                            |                                                                                                                                                       |
|------------------------------------------------------------------------------------------------------------------------|------------------------------------------------------------------------------------------------------------|-------------------------------------------------------------------------------------------------------------------------------------------------------|
| Aldana, Ana M.<br>Ecologist<br>Universidad de Los Andes<br>Colombia                                                    | Aldana, Juanita<br>Ecology<br>Universidad del Norte<br>Colombia                                            | Aldao, Mario Augusto Jesus<br>professor of FOOD Chemistry (Jubilado)<br>Facultad de Ciencias Químicas Universidad Nacional de<br>Córdoba<br>Argentina |
| Aldasoro, Juan J.<br>Botanist<br>Institut Botànic de Barcelona (IBB-CSIC_ICUB)<br>Spain                                | Aldred, Jeffrey<br>Mechanical Engineer<br>View Into The Blue<br>United States of America (the)             | Aldridge, Dennis<br>Veterinarian/conservation biologist<br>Chilean Forest Service<br>Chile                                                            |
| Aldrovandi, Ettore<br>Associate Professor of Mathematics<br>Florida State University<br>United States of America (the) | Alecio, Paula *<br>Biology<br>Instituto de Biociências - USP<br>Brazil                                     | Alegado, Rosanna<br>University of Hawai'i Mānoa<br>United States of America (the)                                                                     |
| Aleixo, Alexandre<br>Researcher and curator of Birds/Zoology<br>Museu Paraense Emílio Goeldi<br>Brazil                 | ALEIXO DA SILVA, JOSÉ ANTÔNIO *<br>Professor Titular<br>Universidade Federal Rural de Pernambuco<br>Brazil | Aleksanyan, Alla<br>Senior scientific researcher / biodiversity and nature<br>conservation<br>Institute of Botany NAS RA<br>Armenia                   |
| Alencar, Edna<br>Teacher Anthropology -<br>Universidade Federal do Pará - UFPA<br>Brazil                               | Alencar, Laura<br>Postdoctoral researcher<br>University of Sao Paulo<br>Brazil                             | Alessandri, Maria<br>Food sciences and technology MS student<br>Oregon State University<br>United States of America (the)                             |
| Aléssio, Filipe<br>Assistant Professor<br>Universidade de Pernambuco<br>Brazil                                         | Alex Sandro Domingos de Almeida, Anderson<br>Student<br>University of the States of Mato Grosso<br>Brazil  | Alexaki, Vasileia Ismini<br>Germany                                                                                                                   |
| Alexander, Ian<br>Ecologist<br>United Kingdom of Great Britain and Northern Ireland<br>(the)                           | Alexander, Isha *<br>Environmental Scientist<br>United States of America (the)                             | Alexandre, Bruno M.<br>Post-doc / Plant Sciences<br>Instituto de Química de Tecnologia Química e Biológica<br>(ITQB)<br>Portugal                      |
| Alexandridis, Nikolaos<br>Biologist<br>Greece                                                                          | Alexandrino, Eduardo Roberto<br>Postdoctoral researcher<br>University of São Paulo - ESALQ<br>Brazil       | Alfaro-Lucas, Joan Manel<br>MSc, PhD candidate<br>Institut Francais de Recherche pour l'Exploitation de la<br>Mer (IFREMER)<br>France                 |
| Alfonso Reyes, B.Sc, M.Sc, Andrés Felipe<br>Mammalogist<br>ONG S.P.E.C.I.E.S - ConCol S.A.<br>Colombia                 | Alford, Ross<br>Professor Emeritus<br>James Cook University<br>Australia                                   | Alhadidi, Sanaa<br>PhD candidate Entomological Ecology<br>Diyala University<br>Iraq                                                                   |

|                                                                                                                                                  |                                                                                                                                         |                                                                                                                                 |
|--------------------------------------------------------------------------------------------------------------------------------------------------|-----------------------------------------------------------------------------------------------------------------------------------------|---------------------------------------------------------------------------------------------------------------------------------|
| Alho, Carlos<br>PhD candidate<br>Wageningen University and Research<br>Netherlands (the)                                                         | Ali, Aal-e<br>Environmental Researcher<br>Macquarie University<br>Australia                                                             | Ali, Abdullahi *<br>Ecologist<br>National Museums of Kenya<br>Kenya                                                             |
| Ali, laith<br>project Manager<br>Nature Iraq organization<br>Iraq                                                                                | Ali, Mohammed Jawad<br>Iraq                                                                                                             | Ali, Wand<br>Entomology<br>Salahaddin University_Erbil<br>Iraq                                                                  |
| Aliaga-Rossel, Enzo<br>Ecologist Research Associate<br>Institute of Ecology, Universidad Mayor de San Andres<br>Bolivia (Plurinational State of) | Aliff, Meagan<br>Researcher<br>University of Minnesota Duluth Natural Resources<br>Research Institute<br>United States of America (the) | Alig, Ralph<br>research land use economist<br>USDA Forest Service, retired<br>United States of America (the)                    |
| Alinsunurin, Jason<br>PhD Student<br>University of Bologna<br>Italy                                                                              | Aliste, Enrique<br>Professor and Director, Department of Geography<br>University of Chile<br>Chile                                      | Alkema, Jeroen<br>PhD Candidate in Behaviour and Chemical ecology<br>Wageningen University and Research<br>Netherlands (the)    |
| Allain, Cristina<br>Organic Food Producer<br>Brazil                                                                                              | ALLAIN, JACQUES<br>Brazil                                                                                                               | Allain, Kevin<br>Research assistant<br>Imperial College London<br>United Kingdom of Great Britain and Northern Ireland<br>(the) |
| Allal, François *<br>Researcher in aquaculture genetics<br>Ifremer<br>France                                                                     | Allan, James<br>PhD Researcher<br>University of Queensland<br>Australia                                                                 | Allchin, Michael<br>Manager, Quesnel river Research Centre<br>University of Northern BC<br>Canada                               |
| Allegretti, Matteo<br>Post-doc<br>EMBL Heidleberg<br>Germany                                                                                     | Allen, Andrew M.<br>Postdoctoral Researcher<br>Radboud University, Department of Animal Ecology and<br>Physiology<br>Netherlands (the)  | Allen, Benjamin<br>Research Fellow (Wildlife Research)<br>University of Southern Queensland<br>Australia                        |
| Allen, James<br>Professor, retired<br>University of Missouri-Columbia<br>United States of America (the)                                          | Allen, Larry G.<br>Chair and Professor of Biology<br>California State University Northridge<br>United States of America (the)           | Allen, Michael<br>PhD Candidate<br>Rutgers University<br>United States of America (the)                                         |
| Allen, Warwick<br>Postdoctoral Fellow<br>Lincoln University<br>New Zealand                                                                       | Allen, William<br>Lecturer<br>Swansea University<br>United Kingdom of Great Britain and Northern Ireland<br>(the)                       | Allgaier, Joachim<br>Senior Researcher Science and Technology Studies<br>Alpen-Adria-Universität<br>Austria                     |

|                                                                                                                   |                                                                                                                                 |                                                                                                                                                |
|-------------------------------------------------------------------------------------------------------------------|---------------------------------------------------------------------------------------------------------------------------------|------------------------------------------------------------------------------------------------------------------------------------------------|
| Allhoff, Korinna<br>Assistant Professor<br>Eberhard Karls Universität Tübingen<br>Germany                         | Allin, Paul<br>Ecologist<br>Greater Makalali private game reserve<br>South Africa                                               | Allison, Steven<br>Ecology and Evolutionary Biology/Earth System Science<br>University of California, Irvine<br>United States of America (the) |
| Allman, Phil<br>Associate Professor of Biology<br>Florida Gulf Coast University<br>United States of America (the) | Allred, Shorna<br>Associate Professor<br>Cornell University<br>United States of America (the)                                   | Almagro, María<br>Postdoctoral researcher<br>Basque Centre for Climate Change-BC3<br>Spain                                                     |
| Almeda, Frank<br>Curator Emeritus<br>California Academy of Sciences<br>United States of America (the)             | Almedawar, Mohamad Musbah<br>Research Fellow<br>Technical University of Dresden<br>Germany                                      | Almeida, Armando J.<br>Professor / Marine Biology and Ichthyology<br>Faculty of Sciences - University of Lisbon<br>Portugal                    |
| Almeida, Bia<br>PhD student<br>State University of Maringá<br>Brazil                                              | Almeida, Bruno<br>Ph.D. Student in Biodiversity and Biotechnology<br>Museum Paraense Emílio Goeldi<br>Brazil                    | Almeida, Carina<br>Portugal                                                                                                                    |
| Almeida, Deivid<br>Graduando<br>UFOPA<br>Brazil                                                                   | Almeida, Jean Carlo<br>Biologist<br>Universidade Federal do Triângulo Mineiro<br>Brazil                                         | Almeida, Rafael<br>Postdoctoral research fellow<br>Universidade Federal de Juiz de Fora<br>Brazil                                              |
| Almeida, Rony Peterson Santos<br>PhD student<br>Museu Paraense Emílio Goeldi<br>Brazil                            | Almeida, Sérgio Mendonça<br>Professor of Zoology / Biodiversity / Biogeography<br>universidade Católica de Pernambuco<br>Brazil | Almeida, Wanessa Rejane *<br>Universidade Federal de Uberlândia<br>Brazil                                                                      |
| Almeida, Wellington<br>Professor<br>University of Brasilia - UnB<br>Brazil                                        | Almeida Rodrigues, Jéssica Marciella *<br>Engenharia Agronomica<br>UNEMAT<br>Brazil                                             | Almeida-Gomes, Mauricio<br>Full Professor<br>Universidade Federal de Mato Grosso do Sul<br>Brazil                                              |
| Almeida-Neto, Mário<br>Professor<br>Universidade Federal de Goiás<br>Brazil                                       | Almén, Anna-Karin<br>Postdoctoral researcher<br>Finland                                                                         | Almoguera, Concepción<br>Researcher Scientist/Plant Molecular Biology<br>IRNAS-CSIC<br>Spain                                                   |
| Alo, Dominique<br>MSc, PhD candidate<br>Pontifical Catholic University of Chile<br>Chile                          | Alofs, Karen<br>Research Associate<br>University of Toronto<br>Canada                                                           | Aloisio, Carolina<br>PhD in Pharmaceutical Science<br>School of Chemistry Sciences, National University of<br>Cordoba<br>Argentina             |

|                                                                                                                            |                                                                                                                                                                             |                                                                                                                                                                |
|----------------------------------------------------------------------------------------------------------------------------|-----------------------------------------------------------------------------------------------------------------------------------------------------------------------------|----------------------------------------------------------------------------------------------------------------------------------------------------------------|
| Aloisio, Simone<br>Professor of Chemistry<br>California State University Channel Islands<br>United States of America (the) | Alonso, Alfonso<br>Managing Director Field Programs, CCS<br>Smithsonian Conservation Biology Institute<br>United States of America (the)                                    | Alonso, Concepcion<br>University Professor<br>Autonomous University of Madrid<br>Spain                                                                         |
| Alonso, David<br>Senior Researcher (Ecology)<br>Spanish National Council for Research (CSIC)<br>Spain                      | Alonso, Inés<br>Associate Professor in Organic Chemistry Department<br>Universidad Autónoma de Madrid<br>Spain                                                              | Alonso, Miguel<br>Ph.D.<br>Department of Evolutionary Biology, Ecology and<br>Environmental Sciences. Faculty of Biology. University of<br>Barcelona.<br>Spain |
| Alonso, Regina<br>Translator\biologist<br>Katzenhaus Translations<br>Brazil                                                | Alonso del Amo, Rocío<br>Senior researcher in ecology<br>Ecotoxicology of Air Pollution, Environmental<br>Department, CIEMAT<br>Spain                                       | Alonso González, Aitor<br>Biologist and High School Teacher<br>Spain                                                                                           |
| Alonso Gutiérrez, Fernando<br>Inland Fisheries Management<br>Junta de Comunidades Castilla-La Mancha<br>Spain              | Alonso Roldán, Virginia<br>Postdoctoral Fellow, Spatial Ecology<br>Instituto Patagónico para el Estudio de los Ecosistemas<br>Continenciales (IPEEC) - CONICET<br>Argentina | Alonso-Alvarez, Carlos<br>Staff scientist, Evolutionary Ecology<br>MNCN-CSIC<br>Spain                                                                          |
| Alonso-Zarazaga, Miguel A.<br>Tenured Scientist, Entomologist<br>Museo Nacional de Ciencias Naturales (CSIC)<br>Spain      | Alosi, Michael<br>High-Performance Operations & Sustainability<br>General Services Administration (US Federal government)<br>United States of America (the)                 | Alov, Petko<br>Research Scientist, computational chemistry<br>Institute of Biophysics and Biomedical Engineering,<br>Bulgarian Academy of Sciences<br>Bulgaria |
| Alpert, Jack<br>Derector<br>SKIL Stanford Knowledge integration Lab.<br>United States of America (the)                     | Alpert, Peter<br>Professor of Biology<br>University of Massachusetts - Amherst<br>United States of America (the)                                                            | Alpuim, Miguel<br>Doctor, General Practician<br>Private<br>Portugal                                                                                            |
| Al-Sallami, Hesham<br>Academic/Pharmacologist/Pharmacist<br>University of Otago<br>New Zealand                             | Alstrom, Per<br>Prof., PhD<br>Dept of Ecology and Genetics, Uppsala University<br>Sweden                                                                                    | Alt, Martin<br>Environmental Sciences<br>University of Koblenz-Landau<br>Germany                                                                               |
| Altamiranda, Mariano<br>PhD student<br>Universidad de Antioquia<br>Colombia                                                | Altamirano, María<br>Professor<br>Universidad de Málaga<br>Spain                                                                                                            | Alteio, Lauren<br>PhD Student<br>University of Massachusetts Amherst<br>United States of America (the)                                                         |

|                                                                                                                                                                                                      |                                                                                                                                                  |                                                                                                                                                            |
|------------------------------------------------------------------------------------------------------------------------------------------------------------------------------------------------------|--------------------------------------------------------------------------------------------------------------------------------------------------|------------------------------------------------------------------------------------------------------------------------------------------------------------|
| Altenrath, Christine<br>Marine Biologist<br>Germany                                                                                                                                                  | Alter, Liz<br>Biology<br>CUNY<br>United States of America (the)                                                                                  | Altringham, John<br>Emeritus Professor, Animal Ecology & Conservation<br>University of Leeds<br>United Kingdom of Great Britain and Northern Ireland (the) |
| Altvater, Susanne<br>Marine spatial planning and environmental law<br>s.Pro - sustainable projects GmbH<br>Germany                                                                                   | Alvarado, Alejandra<br>Microbiology<br>Max Planck Institute for Terrestrial Microbiology<br>Germany                                              | Alvarado Valverde, Jesús<br>Evolutionary Biology<br>Ludwig Maximilians Universität (LMU) Munich<br>Mexico                                                  |
| Alvarenga, Daniel Isaí<br>Biologo<br>El Salvador                                                                                                                                                     | Alvarenga, Guilherme<br>Biologist<br>Brazil                                                                                                      | Alvarez, Andres<br>Musician<br>JacanaJacana<br>Colombia                                                                                                    |
| ALVAREZ, HERNAN<br>ECOLOGIA<br>UNAM<br>Mexico                                                                                                                                                        | Alvarez, Ines<br>Scientist<br>Royal Botanic Garden, CSIC<br>Spain                                                                                | Alvarez, Silvia J.<br>Wildlife Conservation Society<br>Colombia                                                                                            |
| Álvarez Calderón, Francisco Samuel *<br>M.Sc. Management and Conservation of Tropical Forests<br>and Biodiversity<br>UDP Ciencias Neotropicales / Fundación Naturaleza El<br>Salvador<br>El Salvador | Alvarez Filip, Lorenzo<br>Researcher<br>UNAM<br>Mexico                                                                                           | Álvarez Losada, Óscar<br>Ecology<br>Rey Juan Carlos University<br>Spain                                                                                    |
| ÁLVAREZ-ÁLVAREZ, PEDRO<br>PROFESSOR (Associate)<br>UNIVESIDAD DE OVIEDO<br>Spain                                                                                                                     | Álvarez-Borrego, Saúl<br>Professor, Oceanography<br>CICESE<br>Mexico                                                                             | Alvarez-Garrido, LUCIA<br>PhD Student, Forest Ecology<br>DEPARTMENT OF ANIMAL BIOLOGY, VEGETAL BIOLOGY<br>AND ECOLOGY, UNIVERSITY OF JAEN<br>Spain         |
| Alvarez-Iragorry, Alejandro<br>Environmental education<br>Coalicion Clima21<br>Venezuela (Bolivarian Republic of)                                                                                    | Álvarez-Martínez, Jose Manuel<br>Postdoctoral researcher<br>Environmental Hydraulics Institute IH Cantabria,<br>University of Cantabria<br>Spain | Alvarez-Noriega, Mariana<br>PhD student<br>James Cook University<br>Mexico                                                                                 |
| Álvarez-Romero, Jorge<br>Systematic Conservation Planning<br>James Cook University<br>Australia                                                                                                      | Álvarez-Vargas, Francisco Javier<br>Docente<br>Universidad del Valle<br>Colombia                                                                 | Alves, Cátia<br>Master's student in Marine Ecology<br>FCUL<br>Portugal                                                                                     |
| Alves, Davi<br>Macroecology and Macroevolution<br>INCT<br>Brazil                                                                                                                                     | Alves, Eliane<br>Postdoc<br>National Institute of Amazonian Research<br>Brazil                                                                   | Alves, Flávio<br>Teacher<br>University of Mato Grosso do Sul<br>Brazil                                                                                     |

|                                                                                                                 |                                                                                                                    |                                                                                                                                                         |
|-----------------------------------------------------------------------------------------------------------------|--------------------------------------------------------------------------------------------------------------------|---------------------------------------------------------------------------------------------------------------------------------------------------------|
| Alves, Italo Henrique<br>Information Scientist<br>Universidade de Brasília<br>Brazil                            | Alves, Jose<br>Professor<br>ENCE/IBGE<br>Brazil                                                                    | Alves, Jose A.<br>Senior Research Associate / Ecology<br>University of Aveiro<br>Portugal                                                               |
| Alves, Maria Alice S.<br>Prof. Ecology<br>Universidade do Estado do Rio de Janeiro<br>Brazil                    | Alves, Mariana<br>Developmental Biologist, PhD Student<br>EMBL<br>Germany                                          | ALVES, RUY JOSE VÁLKA<br>Full Professor, Botany / geobotanist<br>Universidade Federal do Rio de Janeiro, Museu Nacional<br>Brazil                       |
| Alves Bueno, Paulo Agenor<br>Professor bio statistics and Ecology<br>UTFPR<br>Brazil                            | alves de oliveira, carlos robson<br>Technology Researcher<br>Unicamp<br>Brazil                                     | ALVES MARTINS, FERNANDA<br>POS-DOCTORATE<br>CAPES-BR / MUSEO NACIONAL DE CIENCIAS NATURALES-<br>MADRID<br>Brazil                                        |
| Alves Schetino, Marco Antônio<br>Conservation Genetics<br>Brazil                                                | Alves-Pereira, Alessandro<br>Post-Doc<br>Universidade Estadual de Campinas<br>Brazil                               | Alves-Pinto, Helena<br>PhD candidate - Ecology<br>Universidade Federal do Rio de Janeiro<br>Brazil                                                      |
| Alvord, Charlotte<br>PhD Candidate in Ecotoxicology<br>University of Gothenburg<br>Sweden                       | Alzate, Adriana<br>PhD student<br>University of Groningen<br>Netherlands (the)                                     | Amado, André<br>Associate Professor - Aquatic Ecology<br>Universidade Federal do Rio Grande do Norte/<br>Universidade Federal de Juiz de Fora<br>Brazil |
| Amado, Talita<br>Universidad Rey Juan Carlos<br>Brazil                                                          | Amador, Luis<br>PhD Student, Ecology and Evolution<br>Universidad Austral de Chile<br>Chile                        | Amakali, Annette<br>MSc student<br>University of Namibia<br>Namibia                                                                                     |
| Amâncio Alves Eigenheer, Milene<br>PhD candidate in Ecology and Biodiversity<br>UNESP<br>Brazil                 | Amani, Christian<br>Forest ecologist<br>Congo (the Democratic Republic of the)                                     | Amaral, Andreia<br>Post-doctoral researcher/Animal Genetics<br>Faculdade de Medicina Veterinária, Universidade de<br>Lisboa, Portugal<br>Portugal       |
| Amaral, Cibele Hummel<br>Professor - Remote Sensing and Geoprocessing<br>Federal University of Viçosa<br>Brazil | Amaral, Deise<br>Professor of Wood Technology and Sustainability<br>Federal Rural University of Amazonia<br>Brazil | Amaral Azevedo, Marta Maria<br>Demography researcher and professor<br>State University of Campinas, Population Research Centre<br>Brazil                |
| Amaral de Oliveira, Juliana<br>Ph.D. in Botany<br>University of Sao Paulo<br>Brazil                             | Amarello, Melissa<br>Conservation Biologist<br>Advocates for Snake Preservation<br>United States of America (the)  | Amarillo-Suarez, Angela<br>Associate profesor<br>Pontificia Universidad Javeriana<br>Colombia                                                           |

|                                                                                                                        |                                                                                                                                       |                                                                                                                                                                               |
|------------------------------------------------------------------------------------------------------------------------|---------------------------------------------------------------------------------------------------------------------------------------|-------------------------------------------------------------------------------------------------------------------------------------------------------------------------------|
| Amaro, Renata<br>Professor Genetics and Evolution<br>Universidade Federal de São Paulo, Campus Diadema<br>Brazil       | Amato, Katherine<br>Assistant Professor<br>Northwestern University<br>United States of America (the)                                  | ambroso, stefano<br>phd in marine biology<br>Institut de Ciencies del Mar<br>Spain                                                                                            |
| AMETZAGA ARREGI, IBONE<br>UNIVERSITY LECTURER<br>UNIVERSITY OF THE BASQUE COUNTRY<br>Spain                             | Amezcuca, Felipe<br>Research Professor, Fisheries Ecology<br>Universidad Nacional Autonoma de Mexico<br>Mexico                        | Ameztoy, Iban<br>Information System Analyst<br>Joint Research Centre<br>Italy                                                                                                 |
| Amha, Azeb<br>Senior Researcher (PhD in Linguistics)<br>African Studies Centre, Leiden University<br>Netherlands (the) | AMIAUD, Bernard<br>Professor in Plant community ecology<br>Université de Lorraine<br>France                                           | Amichai, Eran<br>Post-doctoral fellow<br>Department of Zoology, Tel Aviv University<br>Israel                                                                                 |
| Amichot, Marcel<br>Academic Scientist<br>INRA-CNRS-Université Côte d'Azur-ISA<br>France                                | Amin, Anam<br>PhD researcher, Hydrology<br>University of Padova<br>Italy                                                              | Amiri, Shiva<br>Computational Biology<br>BioSymetrics<br>Canada                                                                                                               |
| Amissah, Solomon *<br>Plant Breeder<br>Kwame Nkrumah University of Science and Technology<br>Ghana                     | Ammarell, Gene<br>Emeritus Associate Professor of Anthropology<br>Ohio University<br>United States of America (the)                   | ammer, Christian<br>Professor for Silviculture and Forest Ecology<br>University of Göttingen<br>Germany                                                                       |
| Ammirati, Joe<br>Professor, Biology<br>Univesity of Washington<br>United States of America (the)                       | Amopour Bahnamiry, Mostafa<br>Ph.D candidate, Pharmaceutical biotechnology<br>Institute Pasteur Of Iran<br>Iran (Islamic Republic of) | Amor, Christina<br>Psychology<br>Bangor University<br>United Kingdom of Great Britain and Northern Ireland<br>(the)                                                           |
| Amori, Giovanni<br>Senior Researcher<br>CNR<br>Italy                                                                   | Amorim, Alexandrina<br>Archaeologist<br>Minho University<br>Portugal                                                                  | Amorim, Bruno *<br>Researcher<br>MUSA - Amazon Botanical Garden<br>Brazil                                                                                                     |
| Amorim, Felipe W.<br>Professor of Ecology<br>São Paulo State University<br>Brazil                                      | Amorim, Melania *<br>Professor of Obstetrics and Gynecologic<br>UFCG and IMIP<br>Brazil                                               | AMORIM, MELANIA M *<br>Professor of Obstetrics and Gynecology<br>Instituto de Medicina Integral Prof. Fernando Figueira<br>and Federal University of Campina Grande<br>Brazil |
| Amorim, Thiago<br>PhD student in Ecology<br>Universidade Federal do Ceará<br>Brazil                                    | Amorim Tavares, Jonatas *<br>Pós-graduando<br>Fundação Osvaldo Cruz<br>Brazil                                                         | Amundadottir, Laufey<br>Medical research<br>Iceland                                                                                                                           |

|                                                                                                                                                                                 |                                                                                                                                      |                                                                                                                  |
|---------------------------------------------------------------------------------------------------------------------------------------------------------------------------------|--------------------------------------------------------------------------------------------------------------------------------------|------------------------------------------------------------------------------------------------------------------|
| Amundrud, Sarah<br>Ecologist<br>University of British Columbia<br>Canada                                                                                                        | Anadon-Rosell, Alba<br>Researcher in terrestrial ecology<br>Universitat de Barcelona<br>Spain                                        | ANAKKATHIL, PRADEEPKUMAR<br>ASSOCIATE PROFESSOR GEOLOGY<br>UNIVERSITY OF KERALA<br>India                         |
| Anand, Krishnamurthy *<br>Conservationist and a Materials Scientist<br>GE India Technology Centre<br>India                                                                      | Anatone, Kayla<br>United States of America (the)                                                                                     | ancrenaz, marc<br>Scientific Director<br>HUTAN<br>France                                                         |
| ANDALO, Christophe<br>assistant professor<br>UNiversity<br>France                                                                                                               | Andayani, Noviar<br>Biology<br>Universitas Indonesia<br>Indonesia                                                                    | Anderegg, William<br>Assistant Professor<br>University of Utah<br>United States of America (the)                 |
| Andersen, Ken H<br>Professor, Marine Ecology<br>Technical University of Denmark<br>Denmark                                                                                      | Andersen, Mikael Rørdam<br>Professor<br>Technical University of Denmark<br>Denmark                                                   | Anderson, Courtney<br>Wildlife Biologist<br>United States of America (the)                                       |
| Anderson, Daniela<br>physician<br>Anderson<br>Brazil                                                                                                                            | Anderson, David<br>University of Florida<br>United States of America (the)                                                           | Anderson, David<br>Population Ecology<br>Colorado State University<br>United States of America (the)             |
| Anderson, Emily<br>PhD candidate, Institute for Resources, Environment, and Sustainability<br>University of British Columbia<br>Canada                                          | Anderson, Gregory<br>Prof. Emeritus, Ecology and Evolutionary Biology<br>University of Connecticut<br>United States of America (the) | Anderson, Jane<br>Postdoctoral Research Associate<br>University of Florida<br>United States of America (the)     |
| Anderson, Jeremy<br>Wildlife Conservation<br>International Conservation Services<br>South Africa                                                                                | Anderson, Liana *<br>Researcher - Climate extremes and impacts in Amazonia<br>Cemaden<br>Brazil                                      | Anderson, Marc<br>Environmental Engineer<br>Self-employed<br>United States of America (the)                      |
| Anderson, Mark<br>Chief Executive Officer/Ornithologist<br>BirdLife South Africa<br>South Africa                                                                                | Anderson, Meredith<br>Assistant Professor of Mathematics<br>Adams State University<br>United States of America (the)                 | Anderson, Ray<br>Research Soil Scientist<br>USDA-Agricultural Research Service<br>United States of America (the) |
| Anderson, Sean<br>Chair and Professor of Environmental Science and Resource Management Program<br>California State University Channel Islands<br>United States of America (the) | Anderson, Sharolyn<br>University of South Australia<br>Australia                                                                     | Anderson, Steven<br>Prof. Emeritus Biology<br>University of the Pacific<br>United States of America (the)        |



|                                                                                                          |                                                                                                                        |                                                                                                                        |
|----------------------------------------------------------------------------------------------------------|------------------------------------------------------------------------------------------------------------------------|------------------------------------------------------------------------------------------------------------------------|
| Anderson, Tania<br>Ecologist<br>Freelance<br>South Africa                                                | Anderson King, Kristen<br>Postdoctoral Research Fellow<br>Australia                                                    | Anderson-Lederer, Rosalynn<br>New Zealand                                                                              |
| Andersson, Birgit<br>assistant professor<br>umeå university<br>Sweden                                    | Andersson, Luke<br>M.Sc. Marine Biology<br>Simon Fraser University<br>Canada                                           | Andersson, Malte<br>Professor emeritus<br>Department of Biology and Environment, University of<br>Gothenburg<br>Sweden |
| Andersson, Matilda<br>PhD Student / Limnologist<br>Uppsala University<br>Sweden                          | Andersson, Staffan<br>Professor, Animal Ecology<br>Dept of Biological & Environmental Sciences<br>Sweden               | ANDHARIA, PARESH<br>Assistant Professor<br>Maharaja Krishnakumarsinhji Bhavnagar University<br>India                   |
| Andivia, Enrique<br>Postdoc in Forest Ecology and Restoration<br>Universidad de Alcala<br>Spain          | Andrade, Carlor Fernando<br>Professor / Environmental Education<br>State University of Campinas - UNICAMP<br>Brazil    | Andrade, Denis V.<br>Professor Biology<br>Dept Zoology, UNESP, Rio Claro, SP<br>Brazil                                 |
| Andrade, Gilda<br>Professor/Ecology<br>Universidade Federal do Maranhao<br>Brazil                        | Andrade, Joseph *<br>Distinguished Professor of Bioengineering<br>University of Utah<br>United States of America (the) | Andrade, Pedro<br>PhD Student<br>CIBIO/InBIO, University of Porto<br>Portugal                                          |
| Andrade, Sonia<br>Assistant Professor<br>USP<br>Brazil                                                   | Andrade, Victor<br>INPA<br>Brazil                                                                                      | Andrade Cursino, Kleber *<br>medico<br>unicamp<br>Brazil                                                               |
| Andrade Restrepo, Martin<br>PhD Student<br>Université Paris Diderot<br>France                            | Andrades, Ryan<br>Federal University of Espírito Santo<br>Brazil                                                       | Andrade-Silva, Joudellys<br>PHD student<br>Museu Paraense Emílio Goeldi<br>Brazil                                      |
| Andradi-Brown, Dominic<br>Marine Science Fellow<br>World Wildlife Fund<br>United States of America (the) | Andraus, Augusto<br>MSc. Student, philosophy<br>University of Campinas - UNICAMP<br>Brazil                             | Andre, Anais<br>MSc Management of biodiversity<br>France                                                               |
| Andre, Joyal<br>Professor Emeritus, Mathematics<br>Université du Québec à Montréal (UQAM)<br>Canada      | André, NDUWIMANA<br>Lecturer<br>University of Burundi<br>Burundi                                                       | André, Thiago<br>Evolutionary Biologist<br>Universidade Federal do Oeste do Pará, Santarém<br>Brazil                   |
| Andreä, Jakob<br>Environmental Science<br>Trier University<br>Germany                                    | Andrejev, Sergej<br>Scientific Programming (Computational biology)<br>EMBL<br>Germany                                  | Andreo, Beatriz<br>Plant physiology and environmental microbiology<br>Wageningen University<br>Netherlands (the)       |

|                                                                                                                                                                                     |                                                                                                                                                       |                                                                                                                                      |
|-------------------------------------------------------------------------------------------------------------------------------------------------------------------------------------|-------------------------------------------------------------------------------------------------------------------------------------------------------|--------------------------------------------------------------------------------------------------------------------------------------|
| Andreone, Franco<br>Curator, Zoology<br>Museo Regionale di Scienze Naturali, Via G. Giolitti, 36, I-10123 Torino<br>Italy                                                           | Andres, Andrew<br>Associate Professor/Biology<br>University of Nevada Las Vegas<br>United States of America (the)                                     | Andres, Lusi Jose<br>researcher in photonics<br>Fundación ITMA<br>Spain                                                              |
| Andresen, Ellen<br>University Professor, Ecology<br>Universidad Nacional Autónoma de México<br>Mexico                                                                               | Andrew, Nigel<br>Associate Professor of Entomology<br>University of New England<br>Australia                                                          | andrew, scott<br>lecturer<br>charles sturt university<br>Australia                                                                   |
| Andrews, Nadine<br>Visiting Researcher, The Pentland Centre for Sustainability in Business<br>Lancaster University<br>United Kingdom of Great Britain and Northern Ireland (the)    | Andrews, Robin<br>Professor Emerita Biological Sciences<br>Virginia Tech<br>United States of America (the)                                            | Andrews, Samantha<br>PhD, Marine Ecology<br>Memorial University<br>Canada                                                            |
| Andriamparany, Jessica Noromalala<br>Postdoctoral researcher<br>Organic Plant Production and Agroecosystems Research in the Tropics and Subtropics, University of Kassel<br>Germany | Andriantsaralaza, Sehenio<br>Biologist<br>Madagascar                                                                                                  | Andriessen, Rob<br>Biologist<br>Netherlands (the)                                                                                    |
| Andrieu, Bruno<br>Senior Scientist / Plant Ecophysiology<br>INRA<br>France                                                                                                          | ANDRIGUETTO, JOSE LUCIANO<br>Animal Nutrition<br>Federal University of Parana State UFPR<br>Brazil                                                    | Andriguetto Filho, José Milton<br>Professor, Fisheries and Environmental Sciences<br>Universidade Federal do Paraná<br>Brazil        |
| Androw, Robert<br>Entomologist<br>Carnegie Museum of Natural History, Section of Invertebrate Zoology<br>United States of America (the)                                             | Andújar, Carmelo<br>Researcher/Molecular ecology, phylogenetics and evolution<br>Instituto de Productos Naturales y Agrobiología (IPNA-CSIC)<br>Spain | Anđus, Stefan<br>PhD Student Biology and Hydroecology<br>Institute for Biological Research "Siniša Stanković",<br>Belgrade<br>Serbia |
| Aneck-Hahn, Natalie<br>Director: Environmental Chemical Pollution and Health Research Unit<br>University of Pretoria<br>South Africa                                                | Aney, Warren<br>Senior Wildlife Ecologist<br>United States of America (the)                                                                           | Aney, William<br>Forest Habitat Ecologist, Fire Manager<br>Retired<br>United States of America (the)                                 |
| Angel, Danielle<br>Research Associate<br>Institute for Conservation Research, San Diego Zoo Global<br>United States of America (the)                                                | Angel, Nathan<br>Research Scientist<br>United States of America (the)                                                                                 | ÁNGEL, BAÑARES BAUDET<br>Manager on biodiversity conservation<br>Gobierno de Canarias<br>Spain                                       |

|                                                                                                                                                    |                                                                                                                                                       |                                                                                                                                                             |
|----------------------------------------------------------------------------------------------------------------------------------------------------|-------------------------------------------------------------------------------------------------------------------------------------------------------|-------------------------------------------------------------------------------------------------------------------------------------------------------------|
| Angeloni, Lisa<br>Associate Professor of Biology<br>Colorado State University<br>United States of America (the)                                    | Angelsen, Arild<br>Professor of Economics<br>Norwegian University of Life Sciences (NMBU)<br>Norway                                                   | angiolillo, dea<br>MD<br>United States of America (the)                                                                                                     |
| Anglaaere, Luke<br>Principal Research Scientist / Agroforestry, Biodiversity<br>Conservation<br>CSIR-Forestry Research Institute of Ghana<br>Ghana | Angulo, Elena<br>Researcher / Biodiversity conservation, invasion ecology<br>Estación Biológica de Doñana (CSIC)<br>Spain                             | Angulo-Preckler, Carlos<br>Postdoctoral researcher<br>University of Barcelona<br>Spain                                                                      |
| Anhäuser, Lisa<br>PhD Student<br>EAWAG<br>Switzerland                                                                                              | Aninta, Sabhrina<br>Master Student<br>Ludwig Maximilians Universität<br>Germany                                                                       | Anjos, Diego<br>PhD student<br>University of São Paulo<br>Brazil                                                                                            |
| Ankor, Briony<br>Geospatial Science<br>University of South Australia<br>Australia                                                                  | Annecke, Wendy<br>General Manager: Cape Research Centre<br>South African National Parks<br>South Africa                                               | Anne-Sophie, Voisin<br>Belgium                                                                                                                              |
| Annie-Claude, Roche<br>retired researcher<br>CBM-CNRS<br>France                                                                                    | Anson, Jennifer<br>Wildlife Ecologist<br>Australian Wildlife Conservancy<br>Australia                                                                 | ANSTETT, Marie Charlotte<br>Research Fellow in Ecology and Evolution<br>CNRS<br>France                                                                      |
| Antar, Guilherme<br>PhD Candidate<br>Instituto de Biociências - Universidade de São Paulo<br>Brazil                                                | Anthony, Brandon P.<br>Associate Professor, Environmental Sciences & Policy<br>Central European University<br>Hungary                                 | Antic, Slobodanka<br>Assistant Professor of Educational Psychology<br>Faculty for Special Education and Rehabilitation,<br>University of Belgrade<br>Serbia |
| Antic-Mladenovic, Svetlana<br>PhD, Professor in Soil Schemistry<br>University of Belgrade - Faculty of Agriculture<br>Serbia                       | Antoine, Pierre-Olivier<br>Professor (Paleontology and Evolutionary Sciences)<br>Institut des Sciences de l'Evolution de Montpellier (ISEM)<br>France | Antón Garrido, Beatriz<br>Study Director/Ecotoxicology<br>Eurofins<br>Spain                                                                                 |
| Antonovics, Janis<br>Research Professor<br>University of Virginia<br>United States of America (the)                                                | Anton-Pacheco, Carmen<br>Retired geologist<br>Instituto Geológico y Minero de España<br>Spain                                                         | Anton-Pardo, Maria<br>Postdoctoral researcher<br>Universidade Federal de Goiás<br>Brazil                                                                    |
| Antunes, Celia<br>Professor, PhD Biochemistry<br>Institute of Earth Sciences, University of Evora<br>Portugal                                      | Antunes, L. Caetano M.<br>Researcher in Public Health<br>Oswaldo Cruz Foundation<br>Brazil                                                            | Antunes Carvalho, Fernanda<br>Full professor in Botany<br>Universidade Federal do Rio Grande do Norte<br>Brazil                                             |

|                                                                                                                                                                                      |                                                                                                                       |                                                                                                                                                |
|--------------------------------------------------------------------------------------------------------------------------------------------------------------------------------------|-----------------------------------------------------------------------------------------------------------------------|------------------------------------------------------------------------------------------------------------------------------------------------|
| Antunes de Oliveira e Sousa, José Luiz<br>Full Professor/Retired - Structural Engineering<br>University of Campinas<br>Brazil                                                        | Antunes Dias, Rafael<br>Assistant teacher<br>Universidade Federal de Pelotas<br>Brazil                                | Antunes-Carvalho, Caio<br>Biologist<br>Universidade de São Paulo<br>Brazil                                                                     |
| Aona, Lidyanne<br>Professor / Botany<br>Universidade Federal do Recôncavo da Bahia<br>Brazil                                                                                         | Aparecido, Luiza Maria<br>Postdoctoral Research Associate<br>United States of America (the)                           | Aparicio, José Miguel<br>Researcher / Ecology<br>CSIC<br>Spain                                                                                 |
| Aparicio Manau, Enric<br>Researcher<br>Universitat de Girona<br>Spain                                                                                                                | Aponte-Gonzalez, Felix<br>Principal Associate / Environmental Manager<br>Aponte, Aponte & Asociados<br>Puerto Rico    | Apoteker, Arnaud<br>Director and Founder<br>DAC<br>France                                                                                      |
| Appel, Giulliana<br>PhD student of Ecology<br>National Institute of Amazon Researches<br>Brazil                                                                                      | Appeldoorn, Richard<br>Professor of Marine Sciences (retired)<br>University of Puerto Rico at Mayaguez<br>Puerto Rico | Appiah-Kubi, Emmanuel<br>Research Scientist (Civil/Wood Engineering)<br>CSIR-Forestry Research Institute of Ghana<br>Ghana                     |
| Applebee, Christopher<br>Consultant engineer, Cell Biophysics Laboratory<br>Plentzia Marine Station EHU/UPV Bizkaia<br>United Kingdom of Great Britain and Northern Ireland<br>(the) | Applequist, Wendy<br>Associate Curator<br>Missouri Botanical Garden<br>United States of America (the)                 | Aquilini, Eleonora<br>Post-doc, Environmental Microbiology<br>Montpellier University / CNRS<br>France                                          |
| Aquino, Diego Sebastian<br>PhD. Student<br>3ia - UNSAM<br>Argentina                                                                                                                  | Arad, Zeev<br>Professor of Zoology<br>Technion<br>Israel                                                              | Aragão, Natasha<br>Brazil                                                                                                                      |
| Arakaki, Monica<br>Botany<br>Museo de Historia Natural, UNMSM<br>Peru                                                                                                                | Arakelyan, Marine<br>Head of department of zoology<br>Yerevan State University<br>Armenia                             | Arana, Inés<br>Professor of Microbiology<br>Universidad del País Vasco (UPV/EHU)<br>Spain                                                      |
| Arancibia, Paulina<br>PhD Candidate<br>Rutgers University<br>United States of America (the)                                                                                          | Aranda, Ismael<br>Researcher/Functional Ecology<br>INIA-CIFOR<br>Spain                                                | Aranda-Rickert, Adriana<br>Biologist<br>Centro Regional de Investigaciones Científicas y<br>Transferencia Tecnológica de La Rioja<br>Argentina |
| Aranguena, Lourdes<br>Forestry<br>Peru                                                                                                                                               | Ararat, Korsh *<br>University of Sulaimani<br>Iraq                                                                    | Araujo, Anderson<br>Professor<br>Federal University of Espirito Santo<br>Brazil                                                                |

|                                                                                                                                         |                                                                                                                                          |                                                                                                                                  |
|-----------------------------------------------------------------------------------------------------------------------------------------|------------------------------------------------------------------------------------------------------------------------------------------|----------------------------------------------------------------------------------------------------------------------------------|
| Araujo, Astolfo<br>Archaeologist<br>Museum of Archaeology and Ethnology, University of São Paulo<br>Brazil                              | Araujo, Bernardo<br>PhD Ecology Student<br>Universidade Federal do Rio de Janeiro<br>Brazil                                              | Araujo, Giuliana<br>PhD student<br>Aveiro University<br>Portugal                                                                 |
| Araujo, Julio<br>Student<br>Universidade Federal da Paraíba<br>Brazil                                                                   | Araujo, Louzamira<br>National Institute of Amazonian Research<br>Brazil                                                                  | Araujo, Mônica<br>Doctorate Student in Environmental Sciences and Conservation<br>Federal University of Rio de Janeiro<br>Brazil |
| Araujo, Rafael<br>Curator of Malacology<br>Museo Nacional de Ciencias Naturales. CSIC<br>Spain                                          | Araujo, Renata<br>MSc in Archaeology<br>Université de Paris IV - Sorbonne<br>Brazil                                                      | Araújo de Souza, Caroline<br>Zoology teacher<br>Instituto Federal de Educação, Ciência e Tecnologia do Pará<br>Brazil            |
| Araújo Gomes, João<br>PhD scholarship Physical Geography and Palaeoenvironments<br>Centre for Geographical Studies, IGOT-UL<br>Portugal | Araujo Murakami, Alejandro<br>investigador asociado<br>Museo de Historia Natural Noel Kempff Mercado<br>Bolivia (Plurinational State of) | Arber, Werner *<br>Professor Emeritus of Molecular Microbiology<br>University of Basel<br>Switzerland                            |
| Arbetman, Marina<br>Researcher<br>Universidad Nacional de Río Negro<br>Argentina                                                        | Arbuckle, Kevin<br>Lecturer in Biosciences<br>United Kingdom of Great Britain and Northern Ireland (the)                                 | Archambault, Philippe<br>Professor\marine Ecology<br>Université Laval<br>Canada                                                  |
| Archer, Ruth<br>Evolutionary Biologist<br>University of Exeter<br>United Kingdom of Great Britain and Northern Ireland (the)            | Arcilla, Nico<br>United States of America (the)                                                                                          | Arciniegas, Maria Victoria<br>Biologist<br>Alexander von Humboldt Biological Resources Research Institute<br>Colombia            |
| Ardeshiri, Hamidreza<br>Researcher - PostDoc<br>Norwegian Institute for Air Research<br>Norway                                          | Arellano-Torres, Elsa<br>Paleoceanography and Climate Change<br>Universidad Nacional Autónoma de México<br>Mexico                        | Arenas, Concepcion<br>Associate Professor of Statistics<br>University of Barcelona<br>Spain                                      |
| Arends, Agatha<br>Biologist<br>Arends<br>Netherlands (the)                                                                              | Arévalo Marín, Edna<br>Estudiante de Doctorado<br>Universidad Nacional Autónoma de México<br>Mexico                                      | Arévalo-Sandi, Alexander<br>Master<br>Instituto Nacional de Pesquisas Amazônicas<br>Brazil                                       |

|                                                                                                                                                           |                                                                                                                                              |                                                                                                                                  |
|-----------------------------------------------------------------------------------------------------------------------------------------------------------|----------------------------------------------------------------------------------------------------------------------------------------------|----------------------------------------------------------------------------------------------------------------------------------|
| Arfin Khan, Mohammed Abu Sayed<br>Associate Professor; Forestry and Environmental Science<br>Shahjalal University of Science and Technology<br>Bangladesh | Argelaguet, Ricard<br>PhD student<br>University of Cambridge<br>United Kingdom of Great Britain and Northern Ireland<br>(the)                | Arias, Ligia<br>PhD Student<br>Pontificia Universidad Javeriana<br>Colombia                                                      |
| Arias, Melissa<br>Zoology PhD Student<br>University of Oxford<br>United States of America (the)                                                           | Arias del Real, Rebeca<br>PhD student Fundamental & Applied Ecology<br>Universidad de Barcelona<br>Spain                                     | Arias-Bustamante, Jose<br>PhD Candidate in Forestry<br>University of British Columbia<br>Canada                                  |
| Arias-González, Jesús E.<br>Professor<br>Centro de Investigación y de Estudios Avanzados del I.P.N.<br>Mexico                                             | Arias-Salgado, Elena G.<br>PhD Researcher<br>Advanced Medical Projects<br>Spain                                                              | Arielle, Cordonier<br>hydrobiologist<br>Department of agriculture, environment and transport,<br>state of Geneva                 |
| Arifovic, Anela<br>Graduate student, Epigenetics<br>University of Saarland<br>Bosnia and Herzegovina                                                      | Aristizabal, Natalia<br>Researcher<br>University of São Paulo<br>Colombia                                                                    | Ariza-Carricondo, Cristina<br>Ph.D. in Biology<br>University of Antwerp<br>Belgium                                               |
| Arlettaz, Raphael<br>Full professor of conservation biology and restoration<br>ecology<br>University of Bern<br>Switzerland                               | Arlt, Debora<br>Ecology<br>Department of Ecology, Swedish University of<br>Agricultural Sciences<br>Sweden                                   | Armas, Cristina<br>Researcher<br>Spanish National Research Council (CSIC)<br>Spain                                               |
| Armbrecht, Inge<br>Biologist<br>Universidad del Valle<br>Colombia                                                                                         | Armbruster, William Scott<br>Research Scientist<br>University of Alaska Fairbanks<br>United States of America (the)                          | Armendariz, Iker<br>PhD student in Molecular Biology, Biomedicine and<br>Health<br>Universitat de Girona<br>Spain                |
| Armenteras, Dolors<br>Associate Professor<br>Universidad Nacional de Colombia<br>Colombia                                                                 | Armonies, Werner<br>Senior scientist marine ecology<br>Alfred-Wegener-Institut Helmholtz Zentrum für Polar und<br>Meeresforschung<br>Germany | Armston, John<br>Assistant Research Professor, Geographical Sciences<br>University of Maryland<br>United States of America (the) |
| Armstrong, Adrian<br>Nature Conservation Scientist<br>Ezemvelo KZN Wildlife<br>South Africa                                                               | Armstrong, Asia<br>PhD Candidate / Research Assistant / Marine Biologist<br>University of Queensland<br>Australia                            | Armstrong, Bruce<br>Emeritus Professor Public Health<br>University of Sydney<br>Australia                                        |
| Armstrong, Doug<br>Professor of Conservation Biology<br>Massey University<br>New Zealand                                                                  | Armstrong, Ellie<br>PhD student<br>Stanford University<br>United States of America (the)                                                     | Armstrong, Jessica<br>Ecologist<br>Where There Be Dragons<br>Australia                                                           |

|                                                                                                                                    |                                                                                                          |                                                                                                                                                                                               |
|------------------------------------------------------------------------------------------------------------------------------------|----------------------------------------------------------------------------------------------------------|-----------------------------------------------------------------------------------------------------------------------------------------------------------------------------------------------|
| Árnadóttir, Thóra<br>Research Scientist<br>Institute of Earth Sciences, University of Iceland<br>Iceland                           | ARNAL, Pierre<br>Phd student<br>MNHN - France<br>France                                                  | ARNAUD HAOND, Sophie<br>Evolutionary Ecologist<br>France                                                                                                                                      |
| Arnemo, Jon M<br>Professor of Biomedicine<br>Inland Norway University of Applied Sciences<br>Norway                                | Arnold, Paul *<br>Professor & Chair of Biology<br>Young Harris College<br>United States of America (the) | Arnold, Sarah<br>Researcher/Lecturer in Insect Behaviour and Ecology<br>Natural Resources Institute, University of Greenwich<br>United Kingdom of Great Britain and Northern Ireland<br>(the) |
| Arnold, Thomas<br>Advisor Sustainable Bioeconomy<br>European Commission<br>Belgium                                                 | Arnon, Amir<br>Wildlife Management and Conservation<br>Israel                                            | Arnorsson, Stefan<br>Professor emeritus, geochemistry<br>University of Iceland<br>Iceland                                                                                                     |
| Arnvist, Göran<br>Professor<br>University of Uppsala<br>Sweden                                                                     | Arnsperger, Christian<br>Professor of Sustainability<br>University of Lausanne<br>Switzerland            | Arntzen, Pim<br>researcher<br>Naturalis Biodiversity Center<br>Netherlands (the)                                                                                                              |
| Aron, Serge *<br>Research Director and Professor<br>University of Brussels<br>Belgium                                              | Aronson, James<br>Senior Scientist<br>CCSD, Missouri Botanical Garden<br>United States of America (the)  | Arosa, ML<br>PhD<br>University of Coimbra<br>Portugal                                                                                                                                         |
| Arosio, Riccardo<br>PhD student<br>Scottish Association for Marine Science<br>United Kingdom of Great Britain and Northern Ireland | Arp, Johannes<br>PostDoc<br>Hans Knoell Institute<br>Germany                                             | Arponen, Anni<br>Researcher, Conservation biology<br>University of Helsinki<br>Finland                                                                                                        |
| Arráns Pérez, Azucena<br>Spain                                                                                                     | Arranz, Ignasi<br>PhD<br>University of Vic<br>Spain                                                      | Arribas, Paula<br>postdoctoral researcher<br>Group of Ecology and Evolution in islands. IPNA-CSIC<br>Spain                                                                                    |
| Arriola, Igor<br>Biologist, MSc Student of Plant Biology<br>Federal University of Minas Gerais<br>Brazil                           | Arrowood, Heather<br>Conservationist, Executive Director<br>OELO<br>Gabon                                | Arroyo, Beatriz<br>Researcher in ecology<br>Instituto de Investigación en Recursos Cinegéticos (IREC,<br>CSIC-UCLM)<br>Spain                                                                  |
| Arroyo, Mary T.K.<br>Full Professor<br>University of Chile<br>Chile                                                                | Arroyo, Rossana<br>Professor<br>CINVESTAV-IPN<br>Mexico                                                  | Arroyo-Cabrales, Joaquin<br>Senior Scientist<br>Instituto Nacional de Antropología e Historia<br>Mexico                                                                                       |

|                                                                                                                            |                                                                                                                                                |                                                                                                                                              |
|----------------------------------------------------------------------------------------------------------------------------|------------------------------------------------------------------------------------------------------------------------------------------------|----------------------------------------------------------------------------------------------------------------------------------------------|
| Arroyo-Rodríguez, Víctor<br>Full-time researcher in Ecology<br>Universidad Nacional Autónoma de México<br>Mexico           | Arruda, Andre<br>Biologist and Phd Candidate in Plant Biology<br>Universidade Federal de Minas Gerais<br>Brazil                                | Arruda, Pedro<br>Researcher<br>UNDP, IPC-IG<br>Brazil                                                                                        |
| Arslan, Zübeyde<br>Duzce University<br>Turkey                                                                              | Artim, John<br>Visiting Assistant Professor, Biology<br>Arkansas State University<br>United States of America (the)                            | ARUMUGAM, RATHI<br>ASSISTANT PROFESSOR<br>Dr. M.G.R. Educational and Research Institute, University<br>India                                 |
| Aruna, Edward<br>Founder/Managing Director<br>Reptile and Amphibian Program - Sierra Leone<br>Sierra Leone                 | Arunachalam, Muthukumarasamy<br>Professor<br>Central University of Kerala<br>India                                                             | Arzel, Céline<br>Researcher<br>University of Turku<br>Finland                                                                                |
| Asaad, Irawan<br>PhD Student/Marine science<br>Institute of Marine Science, University of Auckland<br>New Zealand          | Ascarrunz, Nataly<br>Executive Director/Ecosystem Ecology<br>Instituto Boliviano de Investigación Forestal<br>Bolivia (Plurinational State of) | Ascaso, Carmen<br>Research Professor<br>National Museum of Natural Sciences. CSIC<br>Spain                                                   |
| Ascenção, Fernando<br>Masters student<br>Universidade Federal de Minas Gerais<br>Brazil                                    | Ascher, John S.<br>Assistant Professor / Entomologist<br>National University Singapore, Department of Biological<br>Sciences<br>Singapore      | Asdar, Satah<br>PhD Candidate in physical Oceanography<br>Universite de Bretagne Occidentale/ University of Cape<br>Town<br>France           |
| Asfari, Maryam<br>Immunologist -retired<br>INSERM/Merck Sante<br>France                                                    | Ashcroft, Michael<br>Associate Research Fellow<br>University of Wollongong<br>Australia                                                        | Ashford, Oliver<br>D.Phil student, deep-sea ecology<br>University of Oxford<br>United Kingdom of Great Britain and Northern Ireland<br>(the) |
| Ashraf, Uzma *<br>Research Scholar<br>College of Earth and Environmental Sciences, University<br>of the Punjab<br>Pakistan | Ashrafi, Sohrab<br>Associate Professor<br>University of Tehran<br>Iran (Islamic Republic of)                                                   | Ashton, Diane<br>Retired Fishery Biologist<br>NOAA NMFS<br>United States of America (the)                                                    |
| Ashton, Gail<br>Marine Ecologist<br>Smithsonian Environmental Research Center<br>United States of America (the)            | Ashton, Glenn<br>M. Phil. Sustainable Development<br>University of Stellenbosch.<br>South Africa                                               | Ashworth, Justin<br>Postdoctoral fellow<br>University of Technology Sydney<br>Australia                                                      |
| Ask, Jenny<br>Assistant professor in Aquatic ecology<br>Umeå University<br>Sweden                                          | Askes, Emma<br>Zoologist<br>South Africa                                                                                                       | Askjaer, Peter<br>Group Leader in Developmental Biology<br>Andalusian Centre for Developmental Biology<br>Spain                              |



|                                                                                                      |                                                                                                                                   |                                                                                                                                           |
|------------------------------------------------------------------------------------------------------|-----------------------------------------------------------------------------------------------------------------------------------|-------------------------------------------------------------------------------------------------------------------------------------------|
| Aslam, Misbah<br>Graduate student<br>University of Regina<br>Canada                                  | Asmonaite, Giedre<br>PhD student<br>University of Gothenburg, Department of Biological and<br>Environmental Sciences<br>Sweden    | Asp Neto, Nils Edvin<br>Professor in Coastal Geology<br>Universidade Federal do Para - UFPA<br>Brazil                                     |
| Asplund, Dr. Johan<br>Researcher in Ecology<br>Norwegian University of Life Sciences<br>Norway       | Assad, Eduardo<br>Climate change researcher<br>Embrapa<br>Brazil                                                                  | Assemany Cruz, Ticiania *<br>Enfermeira do Trabalho<br>Brazil                                                                             |
| Assis, Claydson<br>Postdoctoral fellowship<br>Universidade de São Paulo<br>Brazil                    | Assis, Rafael<br>Biologist<br>INPA - Manaus<br>Brazil                                                                             | Assis, Vania Regina<br>Postdoc<br>Instituto de Biociências/USP<br>Brazil                                                                  |
| Assmy, Philipp<br>Research Scientist<br>Norwegian Polar Institute<br>Norway                          | Assunção, Argos<br>Ecology Professor<br>Universidade de São Paulo<br>Brazil                                                       | Astfalk, Patrick<br>PhD Plasmaphysics<br>Max-Planck Institute for Plasma Physics, Garching<br>Germany                                     |
| Astrin, Jonas<br>Curator at Research Museum<br>Zoologisches Forschungsmuseum A. Koenig<br>Germany    | Åström, Mårten<br>Senior analyst<br>Swedish agency for Marine and Water Management<br>Sweden                                      | Astúa, Diego<br>Associate Professor / Zoology & Curator of Mammals<br>Universidade Federal de Pernambuco<br>Brazil                        |
| Atanasov, Nikolay<br>Associate Professor<br>University Assen Zlatarov<br>Bulgaria                    | Ataro, Assefa<br>Graduat student at Yeungnam univeristy in Forest<br>resource and ecological restoration, South Korea<br>Ethiopia | Atkinson, Ian<br>Director of eResearch Centre<br>James Cook University<br>Australia                                                       |
| Atkinson, Karina<br>Executive Director of a conservation NGO<br>Fundacion Para La Tierra<br>Paraguay | Atkinson, Scott Consaul<br>Researcher in Spatial Ecology<br>University of Queensland<br>Australia                                 | Atkinson, Stephen<br>Post-Doc<br>Oregon State University<br>United States of America (the)                                                |
| Attalla, Tamer *<br>Head of monitoring unit -Red Sea Protectorates -EEAA<br>Egypt                    | Attanasio, Cláudia<br>Pesquisadora científica<br>Agência Paulista de Tecnologia dos Agronegócios - APTA<br>(SAA/SP)<br>Brazil     | Attrill, Martin<br>Professor of Marine Ecology<br>University of Plymouth<br>United Kingdom of Great Britain and Northern Ireland<br>(the) |
| Attux, Cecilia<br>psychiatrist<br>private office<br>Brazil                                           | Attux, Romis<br>Associate Professor / Electrical Engineering<br>University of Campinas (UNICAMP)<br>Brazil                        | Attwell, Mallory<br>Conservation Biologist<br>International Conservation Services<br>South Africa                                         |

|                                                                                                                                                   |                                                                                                                  |                                                                                                                  |
|---------------------------------------------------------------------------------------------------------------------------------------------------|------------------------------------------------------------------------------------------------------------------|------------------------------------------------------------------------------------------------------------------|
| Aubinet, Marc<br>Honorary professor<br>University of Liege<br>Belgium                                                                             | Aubrey, Moore<br>Associate Professor of Entomology<br>University of Guam<br>Guam                                 | Auclair, Daniel<br>Retired Director of Research, former Deputy Director of Ecology Division<br>INRA<br>France    |
| Auger-Methe, Marie<br>Canada                                                                                                                      | Augustinus, Benno<br>PhD student, Biological control of weeds<br>CABI<br>Switzerland                             | Aulagnier, Stéphane<br>Professor in Conservation Biology<br>University of Toulouse<br>France                     |
| Auliya, Mark<br>Postdoc researcher - Conservation Biology<br>Helmholtz Centre for Environmental Research - UFZ<br>Germany                         | Ault, Shaun<br>Associate Professor of Mathematics<br>Valdosta State University<br>United States of America (the) | Aumann, Robert John<br>Professor (2005 Economics Nobel Laureate)<br>The Hebrew University of Jerusalem<br>Israel |
| Aumont, Olivier<br>Oceanography<br>IRD<br>France                                                                                                  | Aunins, Ainars<br>Leading Researcher, Animal Ecology<br>University of Latvia<br>Latvia                           | AURELLE, Didier<br>Associate Professor, Evolutionary Biology<br>Aix Marseille Université<br>France               |
| Aureo, Wilbert<br>University Faculty Researcher<br>Bohol Island State University<br>Philippines (the)                                             | Ausilio, Giorgia<br>Graduate student, Conservation Biology<br>Lund University<br>Sweden                          | Ausprey, Ian<br>PhD Candidate Biology<br>University of Florida<br>United States of America (the)                 |
| Austin, Jennifer<br>Evolutionary and behavioural ecology<br>Exeter University<br>United Kingdom of Great Britain and Northern Ireland (the)       | Austin, Lisa<br>Principal<br>Geosyntec Consultants<br>United States of America (the)                             | Austin, Suzanne<br>Postdoctoral Fellow/Evolutionary Ecology<br>United States of America (the)                    |
| Autio, Wesley<br>Professor & Director<br>Stockbridge School of Agriculture, University of Massachusetts Amherst<br>United States of America (the) | Avadí, Angel<br>Researcher<br>CIRAD<br>France                                                                    | Avalos, Gerardo<br>Professor of Tropical Ecology<br>University of Costa Rica<br>United States of America (the)   |
| Avarre, Jean-Christophe<br>Researcher in molecular biology<br>IRD<br>France                                                                       | Avelar, David<br>Biology<br>Lisbon University<br>Portugal                                                        | Aveling, Theresa<br>Associate Professor Plant Pathology<br>University of Pretoria<br>South Africa                |
| Averbeck, Paul<br>Scientist/ Environmental Economics<br>University of Koblenz-Landau<br>Germany                                                   | Avermaete, Tessa<br>Project Manager<br>KU Leuven<br>Belgium                                                      | Avery, Graham<br>Retired Archaeozoologist<br>South Africa                                                        |

|                                                                                                                  |                                                                                                                                                                                              |                                                                                                                                                                          |
|------------------------------------------------------------------------------------------------------------------|----------------------------------------------------------------------------------------------------------------------------------------------------------------------------------------------|--------------------------------------------------------------------------------------------------------------------------------------------------------------------------|
| Avery-Gomm, Stephanie<br>Ecology<br>University of Queensland<br>Australia                                        | Avesani Zaborra, Cesare<br>CEO & Scientific Director of Parco Natura Viva Scienti<br>Parco Natura Viva<br>Italy                                                                              | Avgar, Tal<br>Ecologist<br>University of Guelph<br>Canada                                                                                                                |
| Avila, Gonzalo<br>Scientist, Applied Entomology/Biological Control<br>Plant and Food Research<br>New Zealand     | Avila, Luciano Javier<br>Principal Researcher CONICET/Herpetology-Zoology<br>CONICET<br>Argentina                                                                                            | Ávila, André<br>Archaeologist. Graduate student.<br>Museu Nacional, Universidade Federal do Rio de Janeiro<br>UFRJ<br>Brazil                                             |
| Ávila, Enrique<br>Researcher, specialist in Benthic Ecology<br>Universidad Nacional Autonoma de Mexico<br>Mexico | Avila Pires, Teresa<br>Researcher (Herpetology)<br>Museu Paraense Emilio Goeldi<br>Brazil                                                                                                    | Avila Thieme, Maria Isidora<br>Candidate for doctor in biological Sciences, mention<br>Ecology<br>Pontifical Catholic University of Chile<br>Chile                       |
| Avilés, Leticia<br>Biologist<br>University of British Columbia<br>Canada                                         | Avivi, Aaron<br>Research Prof.<br>INstitute of Evolution, University of Haifa<br>Israel                                                                                                      | Avneon, Yoav<br>Data scientist<br>Israel                                                                                                                                 |
| Avner, Uzi<br>Archaeologist, researcher<br>The Dead Sea-Arava Science Center<br>Israel                           | Avril, Amaury<br>PhD student<br>University of Lausanne<br>Switzerland                                                                                                                        | Awade, Marcelo<br>Biologist<br>University of São Paulo<br>Brazil                                                                                                         |
| Awasthy, Monica<br>Ecologist<br>Australia                                                                        | Axe, John<br>Physicist<br>Brookhaven National Laboratory (retired)<br>United States of America (the)                                                                                         | Axler, Rich *<br>Senior Research Associate/ Limnology-Aquatic Ecology<br>U. of Minnesota-Duluth<br>United States of America (the)                                        |
| Axworthy, Jeremy<br>PhD Student<br>University of Washington<br>United States of America (the)                    | Ayah, Emmanuel *<br>PhD in Natural Science and Ecology<br>University of Bonn, ZEF, Centre for Development Research<br>Ghana                                                                  | Ayala, Francisco J.<br>University Professor and Donald Bren Professor of<br>Biological Sciences<br>University of California, Irvine<br>United States of America (the)    |
| Ayalon, Ofira<br>environmental scientist<br>University of Haifa; Samuel Neaman Institute- Technion<br>Israel     | Ayata, Sakina-Dorothee<br>Associate Professor in marine ecology<br>Sorbonne Universités, UPMC Univ Paris 06, CNRS,<br>Laboratoire d'Océanographie de Villefranche-sur-Mer<br>(LOV)<br>France | Ayazo Toscano, Ronald<br>Research Wetlands Specialist / Environmental Scientis<br>The Alexander von Humboldt Biological Resources<br>Research Institute IAVH<br>Colombia |

|                                                                                                                                                             |                                                                                                                                                      |                                                                                                                                 |
|-------------------------------------------------------------------------------------------------------------------------------------------------------------|------------------------------------------------------------------------------------------------------------------------------------------------------|---------------------------------------------------------------------------------------------------------------------------------|
| Ayensa, Garbiñe<br>Head of Documentation and Scientific Support<br>INTECMAR<br>Spain                                                                        | Ayers, Alison<br>Research Associate, Political Economy<br>University of Sussex<br>United Kingdom of Great Britain and Northern Ireland<br>(the)      | Ayers, Christopher<br>Instructor<br>Mississippi State University<br>United States of America (the)                              |
| Ayles, Chris<br>Instructor, Geography & Environmental Technology<br>Camosun College<br>Canada                                                               | Ayotte, Pascale<br>Biologist<br>Canada                                                                                                               | Aytuna, Aydin<br>Retired Profesor of Mathematics<br>Middle East Technical University and Sabancı University<br>Turkey           |
| Azam, Clementine<br>PhD<br>French National Museum of Natural History<br>France                                                                              | Azcarate, Carmen<br>Professor<br>Universitat Autònoma de Barcelona<br>Spain                                                                          | Azcárate, Francisco M.<br>University Professor. Ecology<br>Universidad Autónoma de Madrid. Departamento de<br>Ecología<br>Spain |
| Azevedo, José Manuel N.<br>Professor<br>University of the Azores<br>Portugal                                                                                | Azevedo, Tasso<br>Coordinator SEEG/MapBiomias<br>Climate Observatory<br>Brazil                                                                       | Azevedo, Thaís Nícia<br>Research - CEO<br>Ecotono<br>Brazil                                                                     |
| Azevedo-Santos, Valter M.<br>Zoology<br>Universidade Estadual Paulista (UNESP)<br>Brazil                                                                    | Azikuru Afema, Josephine<br>Veterinarian<br>Washington State University<br>United States of America (the)                                            | Aziz, Faissal *<br>Professor / environmental engineering<br>Aziz<br>Morocco                                                     |
| Aziz, Faissal *<br>Professor<br>caddi Ayad University<br>Morocco                                                                                            | Aznar Blefari, Carlos<br>PhD Candidate / Forensic Psychology<br>PUC/RS<br>Brazil                                                                     | Azzalis, Ligia<br>Professor<br>Unifesp - campus Diadema<br>Brazil                                                               |
| Azzimonti, Gustavo<br>Researcher<br>INIA<br>Uruguay                                                                                                         | Baas, Pieter<br>Professor Emeritus<br>Naturalis Biodiversity Center<br>Netherlands (the)                                                             | babaeian, esmaeil *<br>Ph.d<br>tehran university<br>Iran (Islamic Republic of)                                                  |
| Babczyńska, Agnieszka<br>ecotoxicology, animal physiology<br>Faculty of Biology and Environmental Protection<br>University of Silesia in Katowice<br>Poland | Baberschke, Nora<br>PhD student<br>Leibniz Institute of Freshwater Ecology and Inland<br>Fisheries<br>Germany                                        | Babik, Wiesław<br>Professor of Evolutionary Biology<br>Jagiellonian University<br>Poland                                        |
| Babocsay, Gergely<br>Curator, Collection of Vertebrates<br>Mátra Museum of the Hungarian Natural History Museum<br>Hungary                                  | Baccarat, Roberto Fabio Conway<br>Industrial Automation Graduation (on course)<br>Federal Institute of Science and Technology of São Paulo<br>Brazil | Baccaro, Fabricio<br>Professor<br>Universidade Federal do Amazonas<br>Brazil                                                    |

|                                                                                                                                            |                                                                                                                                                                            |                                                                                                                                               |
|--------------------------------------------------------------------------------------------------------------------------------------------|----------------------------------------------------------------------------------------------------------------------------------------------------------------------------|-----------------------------------------------------------------------------------------------------------------------------------------------|
| Baccin, Chiara<br>PhD Student<br>European Molecular Biology Laboratory<br>Germany                                                          | Bachelet, Dominique<br>Associate Professor<br>OSU<br>United States of America (the)                                                                                        | Bachelier, Julien<br>Botany<br>Freie Unviersitat Berlin<br>France                                                                             |
| Bacher, Sven<br>Professor of Ecology<br>University of Fribourg<br>Switzerland                                                              | Bachman, Steven<br>Plant Conservation Science<br>Royal Botanic Gardens, Kew<br>United Kingdom of Great Britain and Northern Ireland (the)                                  | Bachmann, Jennifer<br>Germany                                                                                                                 |
| Bachmann, Mark<br>Principal Ecologist and Manager<br>Nature Glenelg Trust<br>Australia                                                     | Bachoo, Santosh<br>Senior Ecologist (Marine)<br>Ezemvelo KwaZulu-Natal Wildlife<br>South Africa                                                                            | Bacic, Miguel<br>Full Professor Economics<br>Universidade Estadual de Campinas - UNICAMP<br>Brazil                                            |
| Bacigalupe, Leonardo<br>Full Professor / Evolutionary ecologu<br>Universidad Austral de Chile<br>Chile                                     | Backeljau, Thierry<br>Head of, and Senior Researcher at, the Operational<br>Directorate "Taxonomy and Phylogeny"<br>Royal Belgian Institute of Natural Sciences<br>Belgium | Backhaus, Julia<br>Doctoral Researcher<br>Maastricht University<br>Netherlands (the)                                                          |
| Backhaus, Thomas<br>Professor for Environmental Sciences<br>University of Gothenburg<br>Sweden                                             | Backstrom, Anna<br>Ecologist<br>RMIT University Melbourne<br>Australia                                                                                                     | Backus, Laura<br>Ecologist<br>Institute for Arctic and Alpine Research<br>United States of America (the)                                      |
| Bacles, Cecile<br>Scientific officer<br>CNRS<br>France                                                                                     | Badhon, Mahatub Khan<br>Bangladesh                                                                                                                                         | Badouvas, Nicholas<br>MSc Student on Oceanography and Environmental<br>Management<br>National and Kapodistrian University of Greece<br>Greece |
| Baer, Deborah<br>Psychology<br>retired<br>United States of America (the)                                                                   | Baer, Lori<br>Physical Scientist<br>United States of America (the)                                                                                                         | Baêta, Délio<br>Researcher<br>Museu Nacional - UFRJ<br>Brazil                                                                                 |
| Bagarinao, Teodora<br>Scientist<br>SEAFDEC Aquaculture Department<br>Philippines (the)                                                     | Bagatto, Brian<br>Professor of Biology<br>University of Akron<br>United States of America (the)                                                                            | Bagaturov, Mikhail F.<br>Academic<br>ATINER<br>Russian Federation (the)                                                                       |
| Baggio Compagnucci, Andrea<br>Spatial modeller<br>The James Hutton Institute<br>United Kingdom of Great Britain and Northern Ireland (the) | Bagley, Dean<br>Rsearch Associate<br>University of Central Florida<br>United States of America (the)                                                                       | Bagley, Justin<br>Postdoctoral Scholar<br>Virginia Commonwealth University<br>United States of America (the)                                  |

|                                                                                                                                                     |                                                                                                                                                                               |                                                                                                                                                                             |
|-----------------------------------------------------------------------------------------------------------------------------------------------------|-------------------------------------------------------------------------------------------------------------------------------------------------------------------------------|-----------------------------------------------------------------------------------------------------------------------------------------------------------------------------|
| Baglione, Vittorio<br>Professor / Zoology<br>Universidad de León<br>Spain                                                                           | Bagnaro, Antoine<br>PhD candidate in Marine ecology<br>University of Otago<br>New Zealand                                                                                     | Bagnasco, Marcello<br>Full Professor, Internal Medicine<br>Genoa University, Department of Internal Medicine<br>Italy                                                       |
| Bagnol, Brigitte<br>Anthropology<br>University of Sydney<br>France                                                                                  | Bahaddin, Babak<br>PhD in Informatics<br>University at Albany<br>Iran (Islamic Republic of)                                                                                   | Bahamondes, Luis<br>Professor of Gynaecology<br>University of Campinas Medical School<br>Brazil                                                                             |
| Bahari, Aghali<br>PhD Student Plants Ecology and Biology<br>University of Niamey<br>Niger (the)                                                     | Bahia, Thaise<br>Research<br>Universidade Federal de Minas Gerais<br>Brazil                                                                                                   | Bahm, Matt<br>Conservation Research Program Director and Courtesy<br>Faculty<br>Institute for Applied Ecology and Oregon State University<br>United States of America (the) |
| Bahman, Bianca<br>Graduate Student<br>San Francisco State University<br>United States of America (the)                                              | Bahramnejad, Bahman<br>PhD in Plant Biotechnology<br>University of Kurdistan<br>Iran (Islamic Republic of)                                                                    | Baider, Claudia<br>Herbarium curator/Conservation Biology<br>The Mauritius Herbarium<br>Mauritius                                                                           |
| Baidowi, Muhammad<br>Bachelor of Agronomy and Horticulture<br>Bogor Agricultural University<br>Indonesia                                            | Baijnath, Himansu<br>Retired Professor and Research Associate, Plant<br>Taxonomy<br>School Of Life Sciences, University of KwaZulu-Natal,<br>Westville campus<br>South Africa | Bailey, Carl Donovan<br>Professor of Biology<br>New Mexico State University<br>United States of America (the)                                                               |
| Bailey, Colin<br>PhD Student<br>Simon Fraser University<br>Canada                                                                                   | Bailey, Dawn<br>Marine Ecologist<br>EcoSea Expeditions<br>United States of America (the)                                                                                      | Bailey, Joseph<br>Teaching Associate<br>University of Nottingham<br>United Kingdom of Great Britain and Northern Ireland<br>(the)                                           |
| Baillie, Charles<br>Researcher<br>University of Salford<br>United Kingdom of Great Britain and Northern Ireland<br>(the)                            | Baillie, Robert<br>Mathematician (retired)<br>United States of America (the)                                                                                                  | Baillo, Amparo<br>Associate Professor / Statistics (Mathematics )<br>Universidad Autonoma de Madrid<br>Spain                                                                |
| Baines, David<br>Director of Upland Research<br>Game & Wildlife Conservation Trust<br>United Kingdom of Great Britain and Northern Ireland<br>(the) | Baines, David<br>Species Conservation Researcher<br>Royal Botanic Gardens, Kew<br>United Kingdom of Great Britain and Northern Ireland<br>(the)                               | Baiz, Joseph<br>United States of America (the)                                                                                                                              |

|                                                                                                                             |                                                                                                                                                |                                                                                                                                                                        |
|-----------------------------------------------------------------------------------------------------------------------------|------------------------------------------------------------------------------------------------------------------------------------------------|------------------------------------------------------------------------------------------------------------------------------------------------------------------------|
| Bajaj, Manka<br>Urban Planning<br>UN-Habitat<br>India                                                                       | Bajomi, Bálint<br>PhD candidate<br>Eotvos Lorand University (ELTE), Budapest<br>Hungary                                                        | Bak, Rolf<br>Senior scientist<br>Royal Netherlands Institute for Sea Research<br>Netherlands (the)                                                                     |
| Bakalinsky, Alan<br>Associate Professor<br>Oregon State University<br>United States of America (the)                        | Bakalis, Serafim<br>University of birmingham<br>United Kingdom of Great Britain and Northern Ireland<br>(the)                                  | Baker, Anjanette<br>former researcher, now managing editor<br>American Genetic Assoc / Journal of Heredity<br>United States of America (the)                           |
| Baker, Bethany Jo<br>Chemistry & Geochemistry<br>University of Texas Medical Branch<br>United States of America (the)       | Baker, David J.<br>Postdoctoral Research Fellow (Ecology)<br>Monash University<br>Australia                                                    | Baker, Ingrid<br>Australia                                                                                                                                             |
| Baker, Isabel<br>PhD Candidate, Marine Biology<br>Ireland                                                                   | Baker, Jarrad<br>Ecotoxicologist<br>Curtin University<br>Australia                                                                             | Baker, Jenna<br>Masters Student<br>Oregon State University<br>United States of America (the)                                                                           |
| Baker, Lynne<br>Conservation Biologist<br>American University of Nigeria<br>Nigeria                                         | Baker, Maria<br>Marine Biologist<br>University of Southampton<br>United Kingdom of Great Britain and Northern Ireland<br>(the)                 | Baker, Paul<br>Research officer<br>Bangor University<br>United Kingdom of Great Britain and Northern Ireland<br>(the)                                                  |
| Baker, Phillip<br>Research Fellow<br>Deakin University<br>Australia                                                         | Baker, Sarah<br>Chemist<br>Lawrence Livermore National Laboratory<br>United States of America (the)                                            | Baker, Susan<br>University of Tasmania<br>Australia                                                                                                                    |
| Baker, Tallis<br>Australia                                                                                                  | Baker, Tim<br>Associate Professor<br>School of Geography, University of Leeds<br>United Kingdom of Great Britain and Northern Ireland<br>(the) | Baker, William<br>Head, Comparative Plant and Fungal Biology Department<br>Royal Botanic Gardens, Kew<br>United Kingdom of Great Britain and Northern Ireland<br>(the) |
| Bakirbas, Ahmet<br>Graduate Student, Plant Biology<br>University of Massachusetts Amherst<br>United States of America (the) | Bakker, Edine<br>Geosciences researcher<br>La Palma Research Centre<br>Spain                                                                   | Bakker, Elisabeth<br>Senior Scientist in Ecology<br>Netherlands Institute of Ecology (NIOO-KNAW)<br>Netherlands (the)                                                  |
| Bakker, Freek T.<br>Assistant Professor<br>Wageningen University<br>Netherlands (the)                                       | Bakker, Jan P.<br>em. professor nature conservation<br>University of Groningen<br>Netherlands (the)                                            | Bakker, Joke<br>Conservation Genetics<br>University of Groningen<br>Netherlands (the)                                                                                  |

|                                                                                                                                                   |                                                                                                                                                         |                                                                                                                                      |
|---------------------------------------------------------------------------------------------------------------------------------------------------|---------------------------------------------------------------------------------------------------------------------------------------------------------|--------------------------------------------------------------------------------------------------------------------------------------|
| Bakker, Judith<br>PhD/Biology<br>Netherlands (the)                                                                                                | Bakker, Lisette<br>PhD candidate in Plant Ecology and Biodiversity research<br>Wageningen University<br>Netherlands (the)                               | Bakker, Lizzy<br>MSc<br>Netherlands (the)                                                                                            |
| Bakos, Yong<br>Hacker Lunatique, Computer Science<br>OSU Cascades<br>United States of America (the)                                               | Bakwo Fils, Eric Moise<br>Senior lecturer of wildlife Ecology<br>Faculty of Sciences; University of Maroua<br>Cameroon                                  | Bal, Guillaume<br>Fisheries Scientist<br>Marine Institute<br>Ireland                                                                 |
| Balaban, Noga<br>Israel                                                                                                                           | Balagurusamy, Nagamani<br>Professor, Environmental Biotechnology<br>Facultad de Ciencias Biologicas de la Universidad<br>Autonoma de Coahuila<br>Mexico | Balanya, Joan<br>Biologist. Assistant Professor.<br>Universitat de Barcelona<br>Spain                                                |
| Balard, Alice<br>PhD student, Evolutionary biology<br>Humboldt University, Berlin<br>Germany                                                      | Balasubramanian, Muniyandi<br>Assistant Professor<br>Institute for social and Economic Change<br>India                                                  | Balbar, Arieanna<br>Graduate Student<br>Dalhousie University<br>Canada                                                               |
| Balchin, George Petchell<br>PhD student - Marine Biology<br>University of Sussex<br>United Kingdom of Great Britain and Northern Ireland<br>(the) | Baldew, Menouschka<br>Graduate Student<br>Anton de Kom universiteit Suriname<br>Suriname                                                                | Baldini, Mattia<br>PhD fellow on Energy Efficiency and Renewable Energies<br>Technical University of Denmark<br>Denmark              |
| Baldini, Riccardo Maria<br>Researcher<br>Department of Biology and Tropical Herbarium FT<br>University of Florence<br>Italy                       | Baldrighi, Elisa<br>Post-doc in benthic ecology<br>Ifremer - Brest (France)<br>Italy                                                                    | Balduzzi, Andrea<br>Zoology researcher<br>Università di Genova - DISTAV (Dept. of Health,<br>Environment and Live Sciences)<br>Italy |
| Balerna, Jessica<br>MS Candidate, Biology<br>University of South Florida<br>United States of America (the)                                        | Bales, Roger<br>Distinguished Professor of Engineering<br>University of California, Merced<br>United States of America (the)                            | Balfour, Dave<br>Ecologist<br>Independent<br>South Africa                                                                            |
| Bálint, Miki<br>researcher<br>Senckenberg Biodiversity and Climate Research Centre<br>Germany                                                     | Balkanski, Yves<br>Deputy Director<br>Institut Pascal<br>France                                                                                         | Ball, Alex<br>Ecologist<br>RSPB<br>United Kingdom of Great Britain and Northern Ireland<br>(the)                                     |
| Ball, Eldon<br>Biology<br>Australian National University<br>Australia                                                                             | Ball, Jude<br>Research Fellow, Public Health<br>University of Otago, Wellington<br>New Zealand                                                          | Ball, Patrick<br>Senior Instructor (Biological Sciences)<br>Oregon State Univeristy - Cascades<br>United States of America (the)     |



|                                                                                                                                                    |                                                                                                                                         |                                                                                                              |
|----------------------------------------------------------------------------------------------------------------------------------------------------|-----------------------------------------------------------------------------------------------------------------------------------------|--------------------------------------------------------------------------------------------------------------|
| Ballabrera, Joaquim<br>Científico Titular<br>CSIC<br>Spain                                                                                         | Ballance, Lisa Taylor<br>Adjunct Professor<br>Scripps Institution of Oceanography<br>United States of America (the)                     | Ballard, Grant<br>Chief Science Officer<br>Point Blue Conservation Science<br>United States of America (the) |
| Ballard, John<br>Marine Chemistry - Staff Research Associate<br>UCSD SIO<br>United States of America (the)                                         | Ballare, Kimberly<br>PhD Candidate, Ecology, Evolution, and Behavior<br>University of Texas at Austin<br>United States of America (the) | Ballari, Sebastian Augusto<br>Researcher assistant<br>CONICET<br>Argentina                                   |
| Ballen, Gustavo A.<br>DSc. (c) in Systematics, Taxonomy, and Biodiversity<br>Museu de Zoologia da Universidade de São Paulo<br>Brazil              | Ballesta Artero, Irene<br>Marine Biology (PhD student)<br>Spain                                                                         | Ballesteros, María de la Menta<br>Profesor<br>Universidad Pablo de Olavide<br>Spain                          |
| Ballesteros-Mejia, Liliana<br>Postdoctoral Researcher<br>National Museum of Natural History Paris<br>France                                        | Ballot, Andreas<br>Biologist<br>NIVA<br>Norway                                                                                          | Balma, Giovanni A.C.<br>Ichthyology<br>Museo Civico di Storia Naturale di Carmagnola<br>Italy                |
| balouch, sara<br>PhD student<br>Deakin University, Australia<br>Australia                                                                          | Balys, Vaidas<br>PhD in Mathematics<br>Environmental NGO "Baltijos vilkas"<br>Lithuania                                                 | Bambic, Brianna<br>Coral Biologist<br>UNIVERSITY OF AKUREYRI<br>Iceland                                      |
| Bamme, Johannes<br>PhD Student<br>MPI-CBG<br>Germany                                                                                               | Ban, Natalie<br>Associate Professor<br>Universit of Victoria<br>Canada                                                                  | Bañares, Guillermo<br>PhD student<br>Universidad Rey Juan Carlos<br>Spain                                    |
| Banasiak, Grzegorz<br>Ph.D. Candidate, Civil Engineering<br>Warsaw University of Technology<br>Poland                                              | Banaszak, Anastazia<br>Coral reef biology<br>Universidad Nacional Autónoma de Mexico<br>Mexico                                          | Bancroft, Jay<br>PhD Ecologist<br>USDA-ARS / UDel<br>United States of America (the)                          |
| Banda, Ramsey<br>Environmentalist<br>Malawi                                                                                                        | Bandaru, Vinodh Kumar<br>Postdoctoral Researcher<br>Max-Planck-Institute for Plasma Phsics, Garching<br>Germany                         | Bandemer, Jan<br>research fellow, high school teacher<br>University of Münster<br>Germany                    |
| Bañeras, Lluís<br>Assistant Professor Microbiology<br>University of Girona<br>Spain                                                                | Banes, Graham L<br>Assistant Professor<br>University of Wisconsin-Madison<br>United States of America (the)                             | Bangs, Ed<br>Wildlife biologist<br>US Fish and Wildlife Service, retired<br>United States of America (the)   |
| Banin, Lindsay<br>Research Scientist, Ecology<br>Centre for Ecology and Hydrology<br>United Kingdom of Great Britain and Northern Ireland<br>(the) | Banks, Chris<br>Manager of Conservation Partnerships<br>Zoos Victoria<br>Australia                                                      | Banks, Emma<br>Anthropology<br>Vanderbilt University<br>United States of America (the)                       |

|                                                                                                                                    |                                                                                                                                                                                                  |                                                                                                               |
|------------------------------------------------------------------------------------------------------------------------------------|--------------------------------------------------------------------------------------------------------------------------------------------------------------------------------------------------|---------------------------------------------------------------------------------------------------------------|
| bannister, flavia *<br>primatologist<br>oxford brookes university<br>United Kingdom of Great Britain and Northern Ireland<br>(the) | Bannitz-Fernandes, Renata<br>PhD student Genetics<br>Universidade de São Paulo<br>Brazil                                                                                                         | Bañon, Manuel<br>Meteorologist<br>AEMET<br>Spain                                                              |
| Bañón, Rafael<br>Instituto de Investaigaciones Marinas-CSIC<br>Spain                                                               | BANTCHINA, Béré Benjamin<br>MSc. Student in Biosystems Engineering<br>Institute of Natural Sciences, Uludağ University<br>Turkey                                                                 | Banwari, Rohma<br>lecturer/researcher<br>Anton de Kom University of Suriname<br>Suriname                      |
| Banwell, Cathy<br>Associate-Professor<br>The Australian National University<br>Australia                                           | Bao, Emma<br>Science Undergraduate<br>Griffith University<br>Australia                                                                                                                           | Baptiste, Brigitte<br>Director<br>Instituto Alexander von Humboldt<br>Colombia                                |
| Baraibar, Joaquin<br>European Commission<br>Spain                                                                                  | Barale, Vittorio<br>Senior Scientist, Oceanography<br>Joint research Centre, European Commission<br>Italy                                                                                        | BARAN, Eric<br>Senior scientist, Natural Resources Management<br>WorldFish<br>Cambodia                        |
| Baranov, Viktor<br>Postdoctoral researcher<br>Senckenberg Research Institute<br>Germany                                            | Barata, Carlos<br>Tenure Researcher, Ecotoxicology<br>CSIC<br>Spain                                                                                                                              | Baraza, Elena<br>Associate Professor<br>Universitat de les Illes Balears<br>Spain                             |
| Barba, Josep<br>Postdoc, Biology<br>University of Delaware<br>United States of America (the)                                       | Barbar, Elisar<br>Professor of Biochemistry and Biophysics<br>Oregon State University<br>United States of America (the)                                                                          | Barbará, Thelma<br>Molecular Ecology<br>University of Vienna<br>Austria                                       |
| Barbella, David<br>Assistant Professor of Computer Science<br>Earlham College<br>United States of America (the)                    | Barber, Diane<br>Zoo Curator of Ectotherms<br>United States of America (the)                                                                                                                     | Barber, Donald C.<br>Geology and Environmental Science<br>Bryn Mawr College<br>United States of America (the) |
| Barber, Jesse<br>Associate Professor of Biology<br>Boise State University<br>United States of America (the)                        | Barberi, Paolo<br>Professor in Agronomy and Field Crops, Coordinator<br>International PhD Programme in Agrobiodiversity<br>Institute of Life Sciences, Scuola Superiore Sant'Anna, Pisa<br>Italy | Barber-James, Helen<br>Head: Department of Freshwater Invertebrates<br>Albany Museum<br>South Africa          |
| Barbi, Fabiana<br>Post-doctoral researcher<br>University of Campinas<br>Brazil                                                     | Barbier, Edward<br>Professor of Economics<br>Colorado State University<br>United States of America (the)                                                                                         | Barbier, Matthieu<br>CNRS<br>France                                                                           |

|                                                                                                                         |                                                                                                                      |                                                                                                                                                                         |
|-------------------------------------------------------------------------------------------------------------------------|----------------------------------------------------------------------------------------------------------------------|-------------------------------------------------------------------------------------------------------------------------------------------------------------------------|
| Barbier, Nicolas<br>Researcher, Ecology and Remote Sensing<br>IRD, UMR AMAP<br>France                                   | Barbieri, Edison<br>Professor<br>Instituto de Pesca<br>Brazil                                                        | Barbieri, Jacopo<br>Resercher<br>Politecnico di Milano<br>Italy                                                                                                         |
| Barbieri, José Carlos<br>Environment management<br>Fundação Getulio Vargas<br>Brazil                                    | Barbieri, Pietro<br>PhD student<br>INRA<br>France                                                                    | Barbolini, Natasha<br>Postdoctoral Fellow: Palaeoecology<br>IBED, University of Amsterdam<br>Netherlands (the)                                                          |
| Barbosa, A. Marcia<br>Invited Associate Researcher<br>CIBIO/InBIO - University of Evora<br>Portugal                     | Barbosa, Andres<br>Research Scientist, Principal Investigator<br>Museo Nacional de Ciencias Naturales, CSIC<br>Spain | Barbosa, Catia<br>Professor of Geochemistry<br>Universidade Federal Fluminense<br>Brazil                                                                                |
| Barbosa, Eduardo<br>Postdoctoral researcher<br>Biology Institute - Unicamp<br>Brazil                                    | Barbosa, Henrique<br>Associate Professor<br>Universidade de Sao Paulo, Physics Institute<br>Brazil                   | Barbosa, Leonardo *<br>Biology<br>Universidade de São Paulo<br>Brazil                                                                                                   |
| Barbosa, Milton<br>Postdoctoral Research Associate<br>Federal University of Minas Gerais<br>Brazil                      | Barbosa, Moyses<br>Pos doctoral<br>Universidade Federal Fluminense<br>Brazil                                         | Barbosa, Olga<br>Ecologist<br>Universidad Austral de Chile<br>Chile                                                                                                     |
| Barbosa de Almeida, Ph.D. (Cantab), Almeida<br>Professor, Social Anthropology<br>State University of Campinas<br>Brazil | Barbosa Simioni, Willian<br>Estudante<br>Universidade Estadual Paulista<br>Brazil                                    | Barcante Ladvoat Cintra, Bruno<br>Tropical Ecology Researcher<br>University of Leeds; National Institute for Amazon<br>Research<br>Brazil                               |
| Barcelo, Damia *<br>Director<br>Catalán Institute for Water Research ICRA<br>Spain                                      | Barcelo, Helene<br>Deputy Director<br>Mathematical Sciences research Institute<br>United States of America (the)     | Barceló, Matias<br>Master Student<br>Universidad de Chile<br>Chile                                                                                                      |
| Barcelos, Daniele Cristina<br>Masters Student in Ecology<br>University of Brasília / Instituto Biotrópicos<br>Brazil    | Barcenas, Noe<br>Professor for Mathematics<br>UNAM<br>Mexico                                                         | Barclay, Maxwell V. L.<br>Senior Curator, Coleoptera: Entomology<br>The Natural History Museum, London<br>United Kingdom of Great Britain and Northern Ireland<br>(the) |
| Bardález Del Giudice, Pamela Ivonne<br>Chemistry<br>Peru                                                                | Bardhan, Suchandra<br>Professor<br>Dept. of Architecture, Jadavpur University<br>India                               | Bardonnet, Agnès<br>Researcher<br>INRA<br>France                                                                                                                        |

|                                                                                                                                             |                                                                                                                                                                                |                                                                                                                                                |
|---------------------------------------------------------------------------------------------------------------------------------------------|--------------------------------------------------------------------------------------------------------------------------------------------------------------------------------|------------------------------------------------------------------------------------------------------------------------------------------------|
| Barelli, Claudia *<br>Researcher / Tropical Biodiversity and Conservation<br>Genetic<br>Fondazione E. Mach (FEM)<br>Italy                   | BARENTON, Bruno<br>PhD-DR2-<br>INRA<br>France                                                                                                                                  | Barfod, Anders S.<br>Assoc. professor<br>Dept. of Bioscience, Aarhus University<br>Denmark                                                     |
| Barga, Sarah<br>Post-doctoral Researcher<br>University of Nevada, Reno<br>United States of America (the)                                    | Bargagli, Roberto<br>Professor of Ecology<br>University of Siena<br>Italy                                                                                                      | Bargar, Timothy<br>Environmental Toxicology<br>United States of America (the)                                                                  |
| Bargelt, Lindsey<br>Masters student<br>Trent University<br>Canada                                                                           | Bar-Hen, Avner<br>Professor, statistics<br>Cnam<br>France                                                                                                                      | Barhoumi, Chéïma<br>PhD student, paleoecology<br>ISEM, Montpellier, UMR CNRS 5554<br>France                                                    |
| BARINI, RICARDO<br>FULL PROFESSOR OF OBSTETRICS<br>UNIVERSIDADE ESTADUAL DE CAMPINAS - CAMPINAS<br>STATE UNIVERSITY<br>Brazil               | Barja, Boris<br>Associated Researcher/Professor<br>University of Magallanes<br>Chile                                                                                           | Barjau-Aguilar, Mariel<br>Masters Degree Student<br>National Autonomus University of Mexico UNAM<br>Mexico                                     |
| Barker, Brent<br>Assistant Professor of Physics<br>Roosevelt University<br>United States of America (the)                                   | Barker, Gary<br>Research Associate<br>Landcare Research<br>New Zealand                                                                                                         | Barker, Nicole<br>Ecologist & Project Manager<br>University of Alberta<br>Canada                                                               |
| Barker, Nigel<br>Head of Department of Plant and Soil Sciences<br>University of Pretoria<br>South Africa                                    | Barker, William<br>Associate Dean for Research/Geologist<br>College of Agricultural and Life Sciences The University of<br>Wisconsin-Madison<br>United States of America (the) | Barkman, Alexandria<br>Marine Biology<br>University of Hawaii at Manoa<br>United States of America (the)                                       |
| Barlow, Caine<br>Mycology<br>Australia                                                                                                      | Barlow, Kathryn<br>Ecology<br>Penn State<br>United States of America (the)                                                                                                     | Bar-Massada, Avi<br>Researcher, Ecology<br>University of Haifa - Oranim<br>Israel                                                              |
| Barmuta, Leon<br>Associate Professor, Freshwater Ecology<br>University of Tasmania<br>Australia                                             | Barnard, Christine<br>Science Coordinator<br>Université Laval<br>Canada                                                                                                        | Barneah, Orit<br>Marine biologist (Ph.D)<br>self-employed<br>Israel                                                                            |
| Barnes, Andrew D.<br>Postdoctoral researcher<br>German Centre for Integrative Biodiversity Research<br>(iDiv) Halle-Jena-Leipzig<br>Germany | Barnes, Valerie<br>Psychology<br>US Nuclear Regulatory Commission<br>United States of America (the)                                                                            | Barnhart, Kenneth<br>Landscape Architect, Environmental Planner<br>Bonneville Power Administration (retired)<br>United States of America (the) |

|                                                                                                                          |                                                                                                                                                        |                                                                                                                                                       |
|--------------------------------------------------------------------------------------------------------------------------|--------------------------------------------------------------------------------------------------------------------------------------------------------|-------------------------------------------------------------------------------------------------------------------------------------------------------|
| Barnhart, Theodore<br>Research Assistant - Hydrology<br>University of Colorado Boulder<br>United States of America (the) | Barnosky, Anthony<br>Executive Director and Professor<br>Stanford University<br>United States of America (the)                                         | Barocas, Adi<br>Postdoctoral Associate, conservation biology<br>San Diego Zoo's Institute for Conservation Research<br>United States of America (the) |
| Baroga, Jessica<br>Graduate Student<br>University of the Philippines Los Baños, Laguna<br>Philippines (the)              | Barr, Alexandra<br>United States of America (the)                                                                                                      | Barr, Jennifer<br>Research Assistant / Virology<br>CSIRO<br>Australia                                                                                 |
| Barr, Polly<br>Post-doctoral researcher/ cognitive science<br>University of Sydney<br>Australia                          | Barra, Valeria<br>PhD Candidate in Applied Mathematics<br>New Jersey Institute of Technology<br>United States of America (the)                         | Barradas, Victor L.<br>Senior Researcher<br>Universidad Nacional Autónoma de México<br>Mexico                                                         |
| Barragan, Karol<br>Wildlife production systems<br>Universidad Nacional de Colombia<br>Colombia                           | Barrat, Jean-Alix<br>Professor of geochemistry<br>Université de Bretagne Occidentale, Institut Universitaire<br>Européen de la Mer, Plouzané<br>France | Barratt, Barbara<br>Principal Scientist/Entomologist<br>AgResearch Ltd.<br>New Zealand                                                                |
| Barreira, Helione<br>Master student<br>Federal University of Bahia<br>Brazil                                             | Barreno, Eva<br>Full Professor in Botany<br>University of Valencia<br>Spain                                                                            | Barresi, Marta<br>Biology<br>University of Pisa<br>Italy                                                                                              |
| Barreto, Gilmar<br>Data Modeling Professor<br>University of Campinas<br>Brazil                                           | Barreto, Rebeca<br>Adjunct Professor<br>Universidade Federal do Vale do São Francisco<br>Brazil                                                        | Barreto de Andrade, Rafael<br>Postdoctoral Associate in Ecology<br>Sapienza Università di Roma<br>Italy                                               |
| Barrett, Damien<br>Graduate Research Assistant<br>Oregon State University<br>United States of America (the)              | Barrett, David<br>Visiting Scholar<br>University of Calgary<br>Canada                                                                                  | Barrett, Justine<br>Antarctic and Marine Studies<br>University of Tasmania<br>Australia                                                               |
| Barrett, Louise<br>Professor, Anthropology & Ecology<br>University of Lethbridge<br>Canada                               | Barrett, Meghan<br>Biology, PhD Student<br>Drexel University<br>United States of America (the)                                                         | Barrett, Peter<br>Emritus Professor Geology<br>Victoria University of Wellington<br>New Zealand                                                       |
| Barrett, Russell<br>Systematic Botanist<br>National Herbarium of New South Wales<br>Australia                            | Barrett, Spencer<br>Professor of Evolutionary Biology<br>University of Toronto<br>Canada                                                               | Barrett Jones, Sarah<br>clinical psychology<br>Australia                                                                                              |
| Barrie, Fred R.<br>Plant Systematics<br>Missouri Botanical Garden, St. Louis, MO<br>United States of America (the)       | Barriga, Javier<br>Investigador<br>Instituto de Biodiversidad Alexander von Humboldt<br>Colombia                                                       | Barrington, Guy<br>Master of Biotechnology Student<br>The University of Western Australia<br>Australia                                                |

|                                                                                                            |                                                                                                                             |                                                                                                                              |
|------------------------------------------------------------------------------------------------------------|-----------------------------------------------------------------------------------------------------------------------------|------------------------------------------------------------------------------------------------------------------------------|
| Barrio, Christopher<br>Dr in Oceanography<br>United Kingdom of Great Britain and Northern Ireland<br>(the) | BARRIO, MARIA MARCELA<br>ASSOCIATE INVESTIGATOR<br>FUNDACION CANCER FUCA<br>Argentina                                       | Barrios-Izás, Manuel A. *<br>Research Coordinator / Biological Sciences<br>Centro Universitario de Zacapa, USAC<br>Guatemala |
| Barroeta, Belen<br>Science Communicator<br>IMDEA Water<br>Spain                                            | Barron, James<br>Professor of Biology<br>Montana State University - Billings<br>United States of America (the)              | Barron, Mandy<br>Ecologist<br>Manaaki Whenua<br>New Zealand                                                                  |
| Barron-Gafford, Greg<br>Associate Professor<br>University of Arizona<br>United States of America (the)     | BARROS, FRANCISCO<br>PROFESSOR ECOLOGY<br>UNIVERSIDADE FEDERAL DA BAHIA<br>Brazil                                           | Barros, Gabriel Gazzana<br>PhD candidate in fish ecology<br>National Institute of Amazonian Research - INPA<br>Brazil        |
| Barros, Nathan<br>Assistant Professor<br>Federal University of Juiz de Fora<br>Brazil                      | Barros dos Santos, Fernanda<br>Botânica<br>Jardim Botânico do Rio de Janeiro<br>Brazil                                      | Barroso, Cristiane<br>Universidade Federal do Ceará<br>Brazil                                                                |
| Barshep, Yahkat<br>Academic<br>University of Jos<br>Nigeria                                                | Barshis, Daniel<br>Assistant Professor of Biological Sciences<br>Old Dominion University<br>United States of America (the)  | Bart, Henry<br>Professor of Ecology and Evolutionary Biology<br>Tulane University<br>United States of America (the)          |
| Bart, Martijn<br>PhD candidate marine biology<br>University of Amsterdam<br>Netherlands (the)              | Bart, Sylvain<br>PhD student in ecotoxicology<br>INRA<br>France                                                             | Bartelt, Paul<br>Professor of Biology<br>Waldorf College<br>United States of America (the)                                   |
| Barter Bowlus, Nadine<br>United States of America (the)                                                    | Barthel, Lars<br>PhD student Microbiology<br>Technische Universität Berlin<br>Germany                                       | Barthel, Leon M. F.<br>PhD in Biological Research<br>Leibniz Institut for Zoo- and Wildlife Research<br>Germany              |
| Barthelat, Fabien<br>Biodiversity program coordinator<br>Ministere de l'environnement<br>France            | Bartholomew, Jerri<br>Professor and Head, Dept of Microbiology<br>Oregon State University<br>United States of America (the) | bartlett, kirby<br>Marine Science<br>California State University, Monterey Bay<br>United States of America (the)             |
| Bartomeus, Ignasi *<br>Researcher (ecologist)<br>EBD-CSIC<br>Spain                                         | Barton, Charlotte<br>University of Exeter<br>United Kingdom of Great Britain and Northern Ireland<br>(the)                  | Barton, Jan<br>Research Fellow<br>Deakin University<br>Australia                                                             |
| Barton, Jonathan<br>PhD Candidate<br>James Cook University<br>Australia                                    | Bartrons, Mireia<br>Associate Professor<br>University of Vic - Central University of Catalonia (UVIC-<br>UCC)<br>Spain      | Baruffol, Martin<br>Researcher - Ecology<br>Instituto Alexander von Humboldt<br>Colombia                                     |

|                                                                                                                                                     |                                                                                                                                                            |                                                                                                                                                          |
|-----------------------------------------------------------------------------------------------------------------------------------------------------|------------------------------------------------------------------------------------------------------------------------------------------------------------|----------------------------------------------------------------------------------------------------------------------------------------------------------|
| Bas, Maria<br>PhD student<br>Centro Austral de Investigaciones Científicas (CADIC-CONICET) and Biodiversity Research Institute (IRBio)<br>Argentina | Bas, Yves<br>Researcher<br>MNHN<br>France                                                                                                                  | Basher, Zeenatul<br>Research Scientist, Center for Systems Integration and Sustainability<br>Michigan State University<br>United States of America (the) |
| Bashir, Dr.Muhammad Amjad *<br>Lecturer Department of Plant Protection Ghazi University<br>Dera Ghazi Khan Pakistan<br>Bashir<br>Pakistan           | Baskin, Tobias<br>Professor of Biology<br>University of Massachusetts Amherst<br>United States of America (the)                                            | Basnet, Khadga<br>Professor of Ecology/Zoology<br>Tribhuvan University<br>Nepal                                                                          |
| Basnet, Sabina<br>student<br>Tribhuvan University<br>Nepal                                                                                          | Bass, David<br>Professor of Biology & Curator of Invertebrates<br>University of Central Oklahoma<br>United States of America (the)                         | Bass, Sarah<br>Lecturer in Marine Physical Science<br>University of Plymouth<br>United Kingdom of Great Britain and Northern Ireland (the)               |
| Basset, Alberto<br>Professor of Ecology<br>University of Salento - Lecce<br>Italy                                                                   | Bassham, Susan<br>academic research scientist, life sciences<br>Institute of Ecology and Evolution, University of Oregon<br>United States of America (the) | Bassi, Anna Maria<br>Academic Researcher<br>University of Genoa, Dept. Experimental Medicine<br>Italy                                                    |
| Basso, Luana<br>Professor<br>Universidade Paulista<br>Brazil                                                                                        | Basso, Néstor G.<br>Research Scientist<br>Instituto de Diversidad y Evolución Austral (IDEAus-CONICET)<br>Argentina                                        | Bassos-Hull, Kim<br>Senior Biologist<br>Mote Marine Laboratory<br>United States of America (the)                                                         |
| Basti, David<br>Veterinary medicine<br>United States of America (the)                                                                               | Bastian, Suzanne<br>Associate Professor<br>Oniris - National College for Veterinary and Food Science<br>France                                             | BASTIAN, Thomas<br>Marine Ecologist<br>France                                                                                                            |
| Bastias, Cristina C.<br>PhD Candidate<br>National Museum of Natural Sciences<br>Spain                                                               | Bastida, Jesús M.<br>Postdoctoral researcher/ Evolutionary ecology<br>Universidad Rey Juan Carlos<br>Spain                                                 | Bastos, Ana<br>Post-doc<br>LSCE<br>France                                                                                                                |
| Bastos, Armanda<br>Professor<br>University of Pretoria<br>South Africa                                                                              | Bastos, Lydiane Lucia *<br>Universidade Federal do Amazonas<br>Brazil                                                                                      | Bastos, Wanderley<br>Professor/Biophysics and Ecotoxicology<br>Universidade Federal de Rondônia<br>Brazil                                                |

|                                                                                                                                                  |                                                                                                                                          |                                                                                                                                                                                                     |
|--------------------------------------------------------------------------------------------------------------------------------------------------|------------------------------------------------------------------------------------------------------------------------------------------|-----------------------------------------------------------------------------------------------------------------------------------------------------------------------------------------------------|
| Bastos Francini, Ronaldo<br>Biologist, Professor of Ecology<br>Universidade Católica de Santos<br>Brazil                                         | Bastso, Eduardo<br>Ph Student<br>UFSC - Federal University of Santa Catarina<br>Brazil                                                   | Basu, Arindam<br>Environmental Epidemiology<br>University of Canterbury<br>New Zealand                                                                                                              |
| Basu, Chhandak<br>Associate Professor of Biology<br>California State University, Northridge<br>United States of America (the)                    | Basu, Subhajt<br>Post-Doctoral Fellow<br>Hebrew University of Jerusalem<br>India                                                         | Bataille, Gwennaël<br>PhD student in Ecology<br>Université catholique de Louvain<br>Belgium                                                                                                         |
| Batary, Peter<br>senior researcher<br>University of Goettingen, Agroecology<br>Germany                                                           | Batchvarova, Ekaterina *<br>meteorology<br>Bulgaria                                                                                      | Bateman, Alex<br>Head of Protein Sequence Resources (Computational<br>Biology)<br>European Molecular Biology Laboratory (EMBL-EBI)<br>United Kingdom of Great Britain and Northern Ireland<br>(the) |
| Bateman, Andrew<br>Postdoctoral Fellow, Ecology<br>University of Victoria<br>Canada                                                              | Batenburg, Anneke<br>Postdoc<br>Particle Chemistry Dept., JGU/MPI-C Mainz<br>Germany                                                     | BATISTA, KARINA<br>Scientific Researcher<br>Instituto de Zootecnia<br>Brazil                                                                                                                        |
| Batista, Marcos<br>Research<br>UNICAMP<br>Brazil                                                                                                 | Batista, Silara<br>PhD student in Animal Biology<br>UNESP<br>Brazil                                                                      | Batista Gomes, Ana Rita<br>Post Doc, Microbiology<br>Portugal                                                                                                                                       |
| Batistella, Mateus<br>Researcher<br>Brazilian Agriculture Research Corporation (Embrapa)<br>and State University of Campinas (Unicamp)<br>Brazil | Batorczak, Anna<br>assitant<br>University of Warsaw University Centre for<br>environmental studies and Sustainable Development<br>Poland | Battistara, Margherita<br>Evolutionary Biology<br>Ludwig Maximilian University of Munich<br>Germany                                                                                                 |
| BATUMALAI, SRI VENKATESWARA RAO A/L<br>Conservation<br>Tropical Rainforest Conservation and Research Centre<br>Malaysia                          | Båtvik, Svein Terje<br>Senior adviser<br>Norwegian Environment Agency<br>Norway                                                          | Bauch, Simone<br>Latin America Director<br>Global Canopy Programme<br>United States of America (the)                                                                                                |
| Baudouin, Guillaume<br>PhD<br>Insect Biology Research Institute<br>France                                                                        | Baudrier, Jérôme<br>Ifremer<br>France                                                                                                    | Baudson, Tanja Gabriele<br>Visiting Professor<br>TU Dortmund University<br>Germany                                                                                                                  |
| Bauer, Aaron<br>Professor of Biology<br>Villanova University<br>United States of America (the)                                                   | Bauer, Barbara<br>postdoctoral researcher, Ecology<br>Stockholm University<br>Sweden                                                     | Bauer, Delia<br>Researcher in Limnology<br>Instituto de Limnología Dr. Ringuelet<br>Argentina                                                                                                       |

\* indicates individual also signed 1992 Scientists' Warning to Humanity



|                                                                                                                                         |                                                                                                                                                  |                                                                                                                                         |
|-----------------------------------------------------------------------------------------------------------------------------------------|--------------------------------------------------------------------------------------------------------------------------------------------------|-----------------------------------------------------------------------------------------------------------------------------------------|
| Bauer, Hans<br>Carnivore Conservation<br>WildCRU, University of Oxford<br>United Kingdom of Great Britain and Northern Ireland<br>(the) | Bauer, Rita<br>Program Coordinator<br>Scripps Institution of Oceanography<br>United States of America (the)                                      | Bauhus, Jürgen<br>Professor of Silviculture<br>University of Freiburg<br>Germany                                                        |
| Baum, Julia<br>Associate Professor of Biology<br>University of Victoria<br>Canada                                                       | Baumann, Justin<br>PhD candidate, marine sciences<br>The University of North Carolina at Chapel Hill<br>United States of America (the)           | Baumann, Karsten<br>Adjunct Asst. Prof. UNC Chapel Hill<br>Max Planck Institute for Chemistry<br>Germany                                |
| Baumann, Matthias<br>Postdoctoral Researcher, Land-Use Science<br>Geography Department, Humboldt-Universität zu Berlin<br>Germany       | Baumann-Pickering, Simone<br>Assistant Research Scientist<br>Scripps Institution of Oceanography, UC San Diego<br>United States of America (the) | Baumel, Alex<br>Researcher<br>Aix Marseille University<br>France                                                                        |
| Baumgarten, Jens<br>Professor for Art History<br>Federal University of São Paulo<br>Brazil                                              | Baur, Louise<br>Professor and Head of Child & Adolescent Health<br>University of Sydney<br>Australia                                             | Bautista, Carlos<br>PhD candidate<br>Institute of Nature Conservation of the Polish Academy<br>of Science<br>Poland                     |
| Bauwens, Thomas<br>Post-doctoral researcher in ecological economics<br>Swiss Federal Institute of Technology in Lausanne<br>Switzerland | Bawden, Richard<br>Professor Emeritus<br>Western Sydney University<br>Australia                                                                  | Bax, Narissa<br>Marine biologist<br>Institute for Marine and Antarctic Studies<br>Australia                                             |
| Baxter, Greg<br>Ecologist<br>The University of Queensland<br>Australia                                                                  | Baxter, Peter<br>Research Fellow, Ecology<br>Queensland University of Technology<br>Australia                                                    | Baydoun, Safa<br>Director, Research Center for Environment and<br>DEvelopment<br>Beirut Arab University<br>Lebanon                      |
| Bayerlein, Phoebe<br>Post-doctorial / Ecology<br>UNE<br>Australia                                                                       | Bayliss, Shannon<br>PhD Student, Ecology and Evolutionary Biology<br>University of Tennessee, Knoxville<br>United States of America (the)        | Bayly, Nicholas *<br>Migratory Species Manager / Conservation Biology<br>SELVA: Research for Conservation in the Neotropics<br>Colombia |
| Bayne, Christopher<br>Professor Emeritus of Integrative Biology<br>Oregon State University<br>United States of America (the)            | Baynes, Timothy<br>Adjunct Associate Professor<br>Australian National University<br>Australia                                                    | Bayrakcismith, Rana<br>Biologist<br>Panthera<br>United States of America (the)                                                          |
| Bayraktarov, Elisa<br>Postdoctoral Research Fellow<br>The University of Queensland<br>Australia                                         | Bazan, Soledad<br>Technical assistant<br>CIQUIBIC-CONICET<br>Argentina                                                                           | Bazzino Ferreri, Gaston<br>Marine Biology / Fisheries Ecology<br>CIBNOR<br>Mexico                                                       |

|                                                                                                                                                                                                              |                                                                                                                                          |                                                                                                                                                         |
|--------------------------------------------------------------------------------------------------------------------------------------------------------------------------------------------------------------|------------------------------------------------------------------------------------------------------------------------------------------|---------------------------------------------------------------------------------------------------------------------------------------------------------|
| Beagle, Brittany<br>Geography<br>Netherlands (the)                                                                                                                                                           | Beal, Andria<br>PhD Student<br>Florida International University<br>United States of America (the)                                        | Beals, Kendall<br>Graduate research associate/Ecology & Evolutionary<br>Biology<br>University of Tennessee, Knoxville<br>United States of America (the) |
| Beane, Jeff<br>herpetology<br>North Carolina State Museum of Natural Sciences<br>United States of America (the)                                                                                              | Beardsley, Jonathan<br>Acting Assistant Professor in Mathematics<br>University of Washington - Seattle<br>United States of America (the) | Bearhop, Stuart *<br>Professor of Animal Ecology<br>University of Exeter<br>United Kingdom of Great Britain and Northern Ireland<br>(the)               |
| Bearlin, Andrew<br>Quantitative Ecologist<br>Seattle city light<br>United States of America (the)                                                                                                            | Beasley, Amanda<br>PhD Candidate in marine ecology<br>Southern Cross University<br>Australia                                             | Beattie, Andrfew<br>Professor Emeritus, Environment<br>Macquarie University<br>Australia                                                                |
| Beaty, Lynne<br>Postdoctoral Fellow<br>Trent University<br>Canada                                                                                                                                            | Beauchamp, Tony<br>Techical Advisor Threats (Biosecurity and Ecology)<br>Department of Conservation<br>New Zealand                       | Beaudouin, Rémy<br>Researcher<br>INERIS<br>France                                                                                                       |
| Beaudry, Agnes<br>Assistant Professor, Department of Mathematics<br>University of Colorado Boulder<br>United States of America (the)                                                                         | BEAUNE, David<br>Biologist, Director<br>Ornithological Society of Polynesia<br>French Polynesia                                          | Beauregard, Pascale B.<br>Assistant Professor<br>Université de Sherbrooke<br>Canada                                                                     |
| Beaver, Katy<br>retired biologist<br>Plant Conservation Action group<br>Seychelles                                                                                                                           | Beavers, Christine<br>Beamline scientist<br>COMPRES/Lawrence Berkeley National Laboratory<br>United States of America (the)              | Beazley, Karen<br>Professor, Resource and Environmental Studies<br>Dalhousie University<br>Canada                                                       |
| Beccaloni, George<br>Director of the Alfred Russel Wallace Correspondence<br>Project<br>Charles Darwin Trust, 31 Baalbec Rd, London, N5 1QN<br>United Kingdom of Great Britain and Northern Ireland<br>(the) | Becciu, Paolo<br>PhD student<br>Department of Evolutionary and Environmental Biology,<br>University of Haifa<br>Israel                   | Becerra, Jose Luis<br>Profesor Asociado of Thermodynamics<br>Universidad Pontificia Comillas<br>Spain                                                   |
| Bechara, Fernando<br>Professor / Restoration and Forest Ecology<br>Universidade Tecnológica Federal do Paraná<br>Brazil                                                                                      | Béchet, Arnaud<br>Researcher<br>Tour du Valat<br>France                                                                                  | Becht, Robert<br>Ass Prof<br>University of Twente<br>Netherlands (the)                                                                                  |
| Beck, Harald<br>Biology Professor<br>Towson University<br>United States of America (the)                                                                                                                     | Beck, Jessica<br>Ecology & Evolutionary Biology<br>University of Tennessee<br>United States of America (the)                             | Beck, Kristina<br>University of Bremen<br>Germany                                                                                                       |

|                                                                                                                |                                                                                                                               |                                                                                                                                        |
|----------------------------------------------------------------------------------------------------------------|-------------------------------------------------------------------------------------------------------------------------------|----------------------------------------------------------------------------------------------------------------------------------------|
| Beckedorff, Felipe<br>Postdoctoral fellow<br>University of Miami<br>Brazil                                     | Beckett, Deanna Marie<br>Lecturer in Oral Sciences<br>Otago University<br>New Zealand                                         | Beckmann, Christa<br>Research Fellow<br>University of New England<br>Australia                                                         |
| Becktell, Margot<br>Associate Professor, Biology<br>Colorado Mesa University<br>United States of America (the) | Beckwith, Robaire<br>Biologist/medic<br>University of Cambridge<br>United Kingdom of Great Britain and Northern Ireland (the) | Bedard, Agathe<br>Canada                                                                                                               |
| Bedetti, Cibele<br>Ph.D.<br>Universidade Federal de Minas Gerais<br>Brazil                                     | Bednarska, Agnieszka<br>Associate Professor<br>Polish Academy of Sciences<br>Poland                                           | Bednarz, James<br>Ecologist<br>University of North Texas<br>United States of America (the)                                             |
| Beebe, Alfred<br>Mathematics<br>Salisbury University<br>United States of America (the)                         | Beedy, Ted<br>Wildlife Biologist<br>Beedy Environmental Consulting<br>United States of America (the)                          | Beentjes, Kevin<br>PhD student<br>Naturalis Biodiversity Center<br>Netherlands (the)                                                   |
| Beesley, Leah<br>Research Fellow, Aquatic Ecology<br>The University of Western Australia<br>Australia          | Beets, Nienke<br>Msc student Biodiversity & Evolution<br>Wageningen University and Research Center<br>Netherlands (the)       | Beger, Maria<br>Conservation Science<br>University of Leeds<br>United Kingdom of Great Britain and Northern Ireland (the)              |
| Beggs, Jacqueline<br>Associate Professor, Conservation Biology<br>University of Auckland<br>New Zealand        | Begin, Chantale<br>Senior Instructor, marine biology<br>University of South Florida<br>United States of America (the)         | Behdenna, Abdelkader<br>PhD, Research Assistant<br>University of Glasgow<br>United Kingdom of Great Britain and Northern Ireland (the) |
| Behr, Jutta<br>Ecologist<br>University of Melbourne<br>Australia                                               | BEHERA, TRUPTIMAYEE<br>POSTDOCTORAL ASSOCIATE<br>TOYO UNIVERSITY, JAPAN<br>Japan                                              | Behm, Andrew<br>Anthropology<br>United States of America (the)                                                                         |
| Behounek, Barbara<br>phd student<br>IGB Berlin<br>Germany                                                      | Behrens, Paul<br>Assistant Professor of Energy and Environmental Change<br>Leiden University<br>Netherlands (the)             | Behrens, Sascha<br>IGB<br>Germany                                                                                                      |
| Behrmann-Godel, Jasminca<br>Assistant Professor Biology Fish Ecology<br>Universtiy of Konstanz<br>Germany      | Beier, Paul<br>Regents' Professor of Conservation Biology<br>Northern Arizona University<br>United States of America (the)    | Beier, Ulrika<br>Environmental analyst<br>SLU<br>Sweden                                                                                |

|                                                                                                                                                            |                                                                                                                                                                   |                                                                                                                                      |
|------------------------------------------------------------------------------------------------------------------------------------------------------------|-------------------------------------------------------------------------------------------------------------------------------------------------------------------|--------------------------------------------------------------------------------------------------------------------------------------|
| Beierkuhnlein, Carl<br>Professor of Biogeography<br>University of Bayreuth<br>Germany                                                                      | Beiglböck, Christoph<br>DVM, Wildlife Pathologist<br>University of Veterinary Medicine Vienna<br>Austria                                                          | Beirne, Christopher<br>Post-doc<br>Duke University<br>United States of America (the)                                                 |
| Beirne, Shana<br>PhD Student<br>Stellenbosch University<br>South Africa                                                                                    | Beiroz, Hélio<br>Geography and Land Management<br>Instituto Brasileiro de Administração Municipal<br>Brazil                                                       | Beiroz, Wallace<br>Post-doctoral researcher<br>Universidade Federal de Minas Gerais<br>Brazil                                        |
| Beisiegel, Beatriz<br>Environmental analyst, Chief of Capão Bonito National<br>Forest<br>Instituto Chico Mendes de Conservação da Biodiversidade<br>Brazil | Bejarano Alegre, Vanesa<br>PhD candidate student<br>São Paulo State University-UNESP<br>Brazil                                                                    | Bekessy, Sarah<br>Professor<br>RMIT University<br>Australia                                                                          |
| Békri, Khalida<br>Post-doctoral researcher<br>Agriculture and Agri-Food Canada<br>Canada                                                                   | Belak, Carolyn<br>Marine Ecology<br>Humboldt State University<br>United States of America (the)                                                                   | Belanger, Ken<br>Associate Dean of the Faculty/Professor of Biology<br>Colgate University<br>United States of America (the)          |
| Belbin, Lee<br>Science Advisor<br>The Atlas of Living Australia<br>Australia                                                                               | BEŁCIK, Michał<br>PhD student<br>Department of Nature Conservation, Polish Academy of<br>Sciences<br>Poland                                                       | Belenguer, Maria<br>PhD student<br>Spain                                                                                             |
| BELIN, Catherine<br>Marine Environment Engineer<br>Ifremer<br>France                                                                                       | Belisle, Marc<br>Professor<br>Biologie, Université de Sherbrooke<br>Canada                                                                                        | Belkacemi, Imane<br>student<br>Itsap<br>France                                                                                       |
| Belkin, Natalia<br>Oceanographer<br>Bar Ilan University<br>Israel                                                                                          | Bell, Catherine<br>Marine turtle biologist<br>Pendoley Environmental<br>Australia                                                                                 | Bell, Ian<br>Adjunct senior lecturer<br>University of Queensland<br>Australia                                                        |
| Bell, Karen<br>Lecturer, Biological Sciences<br>The University of Western Australia<br>Australia                                                           | Bell, Michael<br>Professor<br>Stony Brook University<br>United States of America (the)                                                                            | Bell, Neil<br>Research bryologist<br>Royal Botanic Garden Edinburgh<br>United Kingdom of Great Britain and Northern Ireland<br>(the) |
| Bell, Rachel<br>Doctoral Student, Organismic and Evolutionary Biology<br>University of Massachusetts, Amherst<br>United States of America (the)            | Bell, Terrence<br>Assistant Professor in Plant Pathology and Environmental<br>Microbiology<br>The Pennsylvania State University<br>United States of America (the) | Bella, José L<br>Prof. Titular in Genetics<br>Universidad Autónoma de Madrid<br>Spain                                                |

|                                                                                                                                              |                                                                                                                                                               |                                                                                                                  |
|----------------------------------------------------------------------------------------------------------------------------------------------|---------------------------------------------------------------------------------------------------------------------------------------------------------------|------------------------------------------------------------------------------------------------------------------|
| Bellard, Céline *<br>Research fellow<br>CBER, University College of London, UK<br>United Kingdom of Great Britain and Northern Ireland (the) | Belle, Elise<br>Senior Programme Officer<br>UN Environment World Conservation Monitoring Centre<br>United Kingdom of Great Britain and Northern Ireland (the) | Bellefroid, Elke<br>Head Living Collections Botanic Garden - biologist<br>Botanic Garden Meise<br>Belgium        |
| Belley, Renald<br>Biologist, Aquatic Sciences<br>Fisheries and Oceans Canada<br>Canada                                                       | Bellgrove, Alecia<br>Senior Lecturer in Marine Biology & Ecology<br>Deakin University<br>Australia                                                            | Bellinger, M. Renee<br>Post-doctoral Fellow<br>University of Hawaii<br>United States of America (the)            |
| Bellingham, Peter<br>Senior researcher, forest ecology<br>Landcare Research<br>New Zealand                                                   | Bellis, Emily<br>Postdoctoral Researcher<br>United States of America (the)                                                                                    | Bello, Carolina<br>PhD student . Ecology<br>UNESP<br>Brazil                                                      |
| Belmaker, Amos<br>Collection manager of birds<br>The Steinhardt Museum of Natural History<br>Israel                                          | Belmaker, Haim<br>Prof. of Psychiatry<br>Ben Gurion University<br>Israel                                                                                      | Belmaker, Ilana<br>Public Health Specialist<br>Ben-Gurion University of the Negev<br>Israel                      |
| Belmonte, Adam<br>PhD Student<br>Northern Arizona University<br>United States of America (the)                                               | Bélondrade, Maxime<br>M.Sc.<br>Etablissement Francais du sang<br>France                                                                                       | BELTRAME, FLAVIA<br>PhD<br>Federal University of São Paulo<br>Brazil                                             |
| Beltran, Diego<br>MSc Student<br>Universidad de Antioquia<br>Colombia                                                                        | Belzunces, Luc P.<br>First Class Director of Research, Ecotoxicology<br>INRA<br>France                                                                        | Beman, J Michael<br>Associate Professor<br>University of California, Merced<br>United States of America (the)    |
| Ben Hamo, Oshrat<br>PhD student<br>Israel                                                                                                    | Ben-Ari, Matan<br>Lecturer<br>Oranim College<br>Israel                                                                                                        | Benath, Hannah<br>M.Sc. student<br>Swedish University of Agricultural Sciences<br>Sweden                         |
| Benavides, Juan<br>assistant professor<br>Pontifical Xavierian University<br>Colombia                                                        | Benavides, Martin<br>Marine Sciences PhD Student<br>UNC Institute of Marine Sciences<br>United States of America (the)                                        | Benavides Frias, Camila<br>Biologist<br>Universidad Mayor de San Andrés, IRD<br>Bolivia (Plurinational State of) |
| Benavidez, Analia<br>PhD student<br>Instituto de Ecorregiones Andinas (INECOA)-CONICET<br>Argentina                                          | Benayas, Javier<br>Professor/ Ecology<br>Universidad Autonoma de Madrid<br>Spain                                                                              | Benchimol, Maíra<br>Visiting Professor<br>Universidade Estadual de Santa Cruz<br>Brazil                          |

|                                                                                                                                                                        |                                                                                                                         |                                                                                                                                                            |
|------------------------------------------------------------------------------------------------------------------------------------------------------------------------|-------------------------------------------------------------------------------------------------------------------------|------------------------------------------------------------------------------------------------------------------------------------------------------------|
| Bencini, Roberta<br>School of Agriculture and Environment<br>The University of Western Australia<br>Australia                                                          | Ben-David, Merav<br>Professor<br>University of Wyoming<br>United States of America (the)                                | Bender, David<br>Emeritus Professor of Nutritional Biochemistry<br>University College London<br>United Kingdom of Great Britain and Northern Ireland (the) |
| Bender, Irene M.A.<br>PhD candidate in Tropical Ecology<br>German Center for Integrative Biodiversity research (iDiv)<br>Halle-Jena_Leipzig and Senckenberg<br>Germany | Bender, Richard<br>PhD Candidate, Anthropology<br>University of Colorado Boulder<br>United States of America (the)      | Bendersky, Martin<br>Professor Mathematics<br>CUNY Hunter College/Graduate Center<br>United States of America (the)                                        |
| Bendifallah, Leila<br>Maître de conférences<br>Université M'hamed Bougara-Boumerdes<br>Algeria                                                                         | Benedix, James<br>Professor of Biology<br>DePauw University<br>United States of America (the)                           | Benez Ferreira, Juliana<br>Consultant / Biologist, MSc. in Ecology<br>PNUD / Embrapa Cenargen<br>Brazil                                                    |
| Bengtson Nash, Susan<br>Associate Professor Environmental Toxicology<br>Griffith University<br>France                                                                  | Ben-Hur, Eyal<br>Ecology<br>The Hebrew University of Jerusalem<br>Israel                                                | Benita, Miriam<br>Student<br>Bar-Ilan university<br>Israel                                                                                                 |
| Benitez, Maria Soledad<br>Biologist / Plant Pathologist<br>Ponce<br>United States of America (the)                                                                     | Benítez López, Ana<br>Postdoc researcher in Ecology and Conservation Biology<br>Radboud University<br>Netherlands (the) | Benítez Trinidad, Carlos<br>Phd Student<br>Universidade Federal da Bahia - Universidad Pablo de Olavide<br>Spain                                           |
| Benito Alonso, José Luis<br>Ph Dr Biologist<br>Spain                                                                                                                   | Benito-Granell, Xavier<br>Researcher<br>University of Nebraska-Lincoln<br>United States of America (the)                | Benjamins, Steven<br>PDRA, Marine ecology<br>Scottish Association for Marine Science<br>United Kingdom of Great Britain and Northern Ireland (the)         |
| Benkman, Craig<br>Professor of Zoology & Physiology<br>University of Wyoming<br>United States of America (the)                                                         | Bennett, Amanda<br>Ecologist<br>Canada                                                                                  | Bennett, Elizabeth<br>Vice President, Species Conservation<br>Wildlife Conservation Society<br>United States of America (the)                              |
| Bennett, Matthew-James<br>MSc Ecophysiology Ecotoxicology<br>Université de Pierre et Marie Curie<br>France                                                             | Bennett Ponsford, Julian<br>Graduate Student in Botany<br>University of Wyoming<br>United States of America (the)       | Bennie, Jon<br>Ecologist<br>Exeter University<br>United Kingdom of Great Britain and Northern Ireland (the)                                                |

|                                                                                                                                   |                                                                                                                                                              |                                                                                                                                             |
|-----------------------------------------------------------------------------------------------------------------------------------|--------------------------------------------------------------------------------------------------------------------------------------------------------------|---------------------------------------------------------------------------------------------------------------------------------------------|
| Bennion, Matthew<br>Research Intern<br>Zoological Society of London<br>United Kingdom of Great Britain and Northern Ireland (the) | Benoit, Amanda<br>PhD student Ecology and Evolutionary Biology<br>University of Tennessee<br>United States of America (the)                                  | Benoit, Jean-Marc<br>Canada                                                                                                                 |
| Benslimane, Abdelali<br>Professor<br>Cadi Ayyad University<br>Morocco                                                             | Benson-Amram, Sarah<br>United States of America (the)                                                                                                        | Bensusan, Nurit<br>Biodiversity Coordinator<br>Instituto Socioambiental<br>Brazil                                                           |
| Bentkowski, Piotr<br>evolutionary biologist<br>INSERM / UPMC<br>France                                                            | Bentley, Andrew<br>Collections Manager for Ichthyology<br>University of Kansas Biodiversity Institute<br>United States of America (the)                      | Bentley, Blair<br>PhD Candidate<br>University of Western Australia<br>Australia                                                             |
| Benvenuto, Chiara<br>Lecturer in Zoology<br>University of Salford<br>United Kingdom of Great Britain and Northern Ireland (the)   | Benz, J. Philipp<br>Assistant Professor for Fungal Genetics<br>Technical University of Munich<br>Germany                                                     | Benzi Braga, Rafael<br>PosDoctor Entomology<br>Universidade Federal do Rio de Janeiro<br>Brazil                                             |
| Beorchia, Dylan<br>Botanist<br>United States of America (the)                                                                     | Beqiraj, Sajmir<br>Professor, Marine Biology and Invertebrate Zoology<br>Biology Department, Faculty of Natural Sciences,<br>University of Tirana<br>Albania | Berauer, Bernd<br>PhD-Student<br>University of Bayreuth; Departement of Disturbance<br>Ecology<br>Germany                                   |
| Bercê, William<br>Ecologist<br>São Paulo State University<br>Brazil                                                               | Beresford, Alison<br>Conservation Scientist<br>RSPB Centre for Conservation Science<br>United Kingdom of Great Britain and Northern Ireland (the)            | Berestok, Taisiia<br>Catalonia Institute for Energy Research<br>Spain                                                                       |
| Beretta, Magda *<br>Professor - Environmental Chemistry<br>Universidade Federal da Bahia<br>Brazil                                | Berezowski, John<br>Research Group Leader/Veterinary Epidemiology<br>Veterinary Public Health Institute, University of Bern<br>Switzerland                   | Berg, Åke<br>Professor in Conservation Biology<br>Swedish University of Agricultural Sciences, The Swedish<br>Biodiversity centre<br>Sweden |
| Berg, Carl<br>Ecologist<br>Surfrider Foundation<br>United States of America (the)                                                 | Berg, Matty<br>Professor in Soil fauna Community Ecology<br>Vrije Universiteit, Amsterdam<br>Netherlands (the)                                               | Bergallo, Helena<br>Professor<br>Universidade do Estado do Rio de Janeiro<br>Brazil                                                         |
| Berger, Josef<br>entomology<br>Sweden                                                                                             | Berger, Lee<br>Associate Dean Research, Veterinary Sciences<br>James Cook University<br>Australia                                                            | Berger, Ryan<br>Marine Ecologist<br>United States of America (the)                                                                          |

|                                                                                                                                         |                                                                                                                                                  |                                                                                                                                                         |
|-----------------------------------------------------------------------------------------------------------------------------------------|--------------------------------------------------------------------------------------------------------------------------------------------------|---------------------------------------------------------------------------------------------------------------------------------------------------------|
| Bergeron, Colin<br>Canada                                                                                                               | Bergert, Martin<br>EMBL<br>Germany                                                                                                               | Berger-Tal, Oded<br>Senior lecturer, Ecology<br>Ben-Gurion University of the Negev<br>Israel                                                            |
| Berges, John A<br>Professor of Biological and Freshwater Science<br>University of Wisconsin Milwaukee<br>United States of America (the) | Berget, Carolina<br>PhD Student<br>Wageningen University & Research<br>Netherlands (the)                                                         | Berggren, Matz<br>Marine Scientist<br>Marine Sciences, University of Gothenburg<br>Sweden                                                               |
| Bergman, Ake<br>Director of Swedish Toxicology Sciences Research Center<br>Karolinska Institutet<br>Sweden                              | bergman, steven<br>Principal Regional Geologist (retired)<br>Shell International Exploration & Production Inc.<br>United States of America (the) | Bergs, Rolf<br>Economist and Pol. Scientist<br>PRAC<br>Germany                                                                                          |
| Bergstrom, Anna<br>hydrology<br>United States of America (the)                                                                          | Bergstrom, Bradley<br>Professor of Biology<br>Valdosta State University<br>United States of America (the)                                        | Bergstrom, Ellie<br>PhD student<br>Griffith University<br>Australia                                                                                     |
| Bergström, Irina<br>Head of the Unit<br>Finnish Environment Institute SYKE<br>Finland                                                   | Berhe, Asmeret Asefaw<br>Associate Professor, Soil Biogeochemistry<br>University of California, Merced<br>United States of America (the)         | Berk, Elizabeth<br>PhD Candidate, Anthropology<br>Yale University<br>United States of America (the)                                                     |
| Berkeley, Beaux<br>assistant professor of biology<br>Otterbein University<br>United States of America (the)                             | Berlanga, Juan José<br>Professor of Molecular Biology<br>Universidad Autónoma de Madrid<br>Spain                                                 | Berlendis, Sabrina<br>Postdoctoral researcher<br>Université de Bretagne Occidentale (UBO)<br>France                                                     |
| Berlinck, Roberto<br>Full Professor of Chemistry<br>Universidade de São Paulo<br>Brazil                                                 | Berman, Tali S<br>PhD candidate<br>University of Haifa<br>Israel                                                                                 | Berman-Frank, Ilana<br>Biological oceanographer<br>Bar Ilan University<br>Israel                                                                        |
| BERMEJO, MARTA<br>JEFE DE SERVICIO MEDICO<br>CSIC<br>Spain                                                                              | Bermejo Bermejo, Ana *<br>Ornithology<br>SEO/BirdLife<br>Spain                                                                                   | Bermejo-Bermejo, Victoria<br>Senior Researcher<br>Environmental Department. CIEMAT (Research Center for<br>Energy, Environment and Technology)<br>Spain |
| Bermudez-Urdaneta, Martin<br>Economist, Professor<br>Pontificia Universidad Javeriana<br>Colombia                                       | Bernadou, Abel<br>Postdoctoral researcher<br>University of Regensburg<br>Germany                                                                 | Bernal, Rodrigo<br>Associate Researcher<br>Jardín Botánico del Quindío<br>Colombia                                                                      |



|                                                                                                                                          |                                                                                                                                                             |                                                                                                                                |
|------------------------------------------------------------------------------------------------------------------------------------------|-------------------------------------------------------------------------------------------------------------------------------------------------------------|--------------------------------------------------------------------------------------------------------------------------------|
| Bernard, Enrico<br>Adjunct Professor, Conservation Biology<br>Universidade Federal de Pernambuco<br>Brazil                               | Bernard, Kim<br>South Africa                                                                                                                                | Bernardes, Samuel<br>MSc in Evolutionary Genetics<br>Universidade Federal de Minas Gerais<br>Brazil                            |
| Bernardi, Leopoldo<br>Postdoctoral student<br>Universidade Federal de Lavras<br>Brazil                                                   | Bernardino, Angelo<br>Assistant Professor<br>Universidade Federal do Espirito Santo<br>Brazil                                                               | Bernardo, Cristiane<br>Marine Biologist<br>Scrips institute of oceanography<br>United States of America (the)                  |
| Bernardo, Holly L.<br>PhD Student / Plant Conservation Biology<br>Washington University in Saint Louis<br>United States of America (the) | Bernardo-Faura, Marti<br>Position: Head of Molecular Data Analysis. Discipline:<br>Systems Biology<br>Centre for Research in Agricultural Genomics<br>Spain | Bernatas, Susan<br>Ecologist / Wildlife Biologist<br>Vision Air Research<br>United States of America (the)                     |
| Berneck, Bianca<br>Herpetology<br>Universidade Estadual Paulista<br>Brazil                                                               | Berner, Daniel<br>Group leader, PhD; Evolutionary Biology<br>University of Basel<br>Switzerland                                                             | Berner, Logan<br>Postdoctoral Scholar / Environmental Science<br>Northern Arizona University<br>United States of America (the) |
| Bernier-Graveline, Alexandre<br>Biologist/marine mammology<br>Université du Québec à Montréal<br>Canada                                  | Berning, Bjorn<br>Head, Geoscience Collections<br>Upper Austrian State Museum<br>Austria                                                                    | Bernstein, Rachael<br>Phd candidate in plant biology<br>University of Massachusetts Amherst<br>United States of America (the)  |
| bernus, jeffrey<br>marine scientist<br>Parc national de la Guadeloupe FWI<br>France                                                      | Béroule, Dominique<br>Researcher<br>CNRS<br>France                                                                                                          | Berriel Bueno, Diana<br>Coastal Oceanography<br>CINVESTAV-Merida<br>Mexico                                                     |
| Berry, Eric<br>Mathematics<br>Montana State University<br>United States of America (the)                                                 | Bert, Didier<br>Research Engineer in Dendroecology<br>INRA<br>France                                                                                        | Bertaglia, Marco<br>Scientific Officer<br>European Commission, Joint Research Centre<br>Italy                                  |
| Berteaux, Dominique<br>Professor<br>Université du Québec à Rimouski<br>Canada                                                            | Bertelli, Chiara<br>Research assistant marine open water ecology<br>Swansea University<br>United Kingdom of Great Britain and Northern Ireland<br>(the)     | Berthold, David Erwin<br>Research Assistant<br>Florida International University<br>United States of America (the)              |
| Berti, Emilio<br>PhD student<br>Ecoinformatics and Biodiversity - Aarhus University<br>Denmark                                           | Bertile, Fabrice<br>Researcher in non-model animal physiology<br>CNRS, Université de Strasbourg<br>France                                                   | Bertilsson, Stefan<br>Professor, Biology<br>Uppsala University<br>Sweden                                                       |

|                                                                                                                         |                                                                                                                               |                                                                                                                                                       |
|-------------------------------------------------------------------------------------------------------------------------|-------------------------------------------------------------------------------------------------------------------------------|-------------------------------------------------------------------------------------------------------------------------------------------------------|
| Bertola, Laura<br>Postdoc Wildlife Genomics<br>City University of New York<br>United States of America (the)            | Bertolino, Sandro<br>Ecologist<br>University of Turin<br>Italy                                                                | Bertoncini, Athila<br>Pos-Doc<br>Universidade Federal do Estado do Rio de Janeiro<br>Brazil                                                           |
| Bertrand, Arnaud<br>Senior Scientist<br>IRD<br>France                                                                   | Bertrand, Colette<br>Researcher in ecology<br>INRA, Functional ecology and ecotoxicology of<br>agroecosystems group<br>France | Bertrand, Luc<br>Professor and Researcher<br>UCL - FNRS<br>Belgium                                                                                    |
| Bertrand, Philip<br>PhD Candidate - Arctic Ecology<br>Université du Québec à Rimouski (UQAR)<br>Canada                  | Bertsch, Hans<br>Marine Biology<br>Semi-retired<br>United States of America (the)                                             | Bertzky, Bastian<br>Scientific Project Officer<br>Joint Research Centre (JRC) of the European Commission<br>Italy                                     |
| Berx, Peter<br>Entomologist<br>Bee & Insect Center Liègeberg<br>Belgium                                                 | Beschta, Robert<br>Emeritus Professor<br>Oregon State University<br>United States of America (the)                            | Besnard, Guillaume<br>Researcher<br>CNRS, UPS<br>France                                                                                               |
| Bessa, Angela<br>Centre for Functional Ecology, University of Coimbra<br>Portugal                                       | Besteiro, Celia<br>Associate Professor<br>University of Santiago de Compostela<br>Spain                                       | Bestelmeyer, Patricia<br>Senior Lecture, Cognitive Neuroscience<br>Bangor University<br>United Kingdom of Great Britain and Northern Ireland<br>(the) |
| Bester, Marthan<br>Senior Research Fellow<br>University of Pretoria<br>South Africa                                     | Bestion, Elvire<br>PostDoc<br>University of Exeter<br>United Kingdom of Great Britain and Northern Ireland<br>(the)           | Betley, Stanislaw<br>Full Professor in Mathematics<br>University of Warsaw<br>Poland                                                                  |
| Bettinetti, Roberta<br>Associate Professor in Ecology<br>University of Insubria<br>Italy                                | Betts, Clive<br>Entomologist<br>Ambios Ltd<br>United Kingdom of Great Britain and Northern Ireland<br>(the)                   | Betts, Matthew<br>Professor<br>Oregon State University<br>United States of America (the)                                                              |
| Beudels-Jamar, Roseline C.<br>Head, Conservation Biology Unit<br>Royal Belgian Institute of Natural Sciences<br>Belgium | Bevilaqua, Dušan<br>landscape ecologist<br>IALE- branch of Slovakia<br>Slovakia                                               | Bey, Eugenia<br>California State University, Long Beach<br>United States of America (the)                                                             |
| Beyersmann, Elisabeth<br>Early Career Researcher, Cognitive Science<br>Macquarie University<br>Australia                | Beygi, Hadi *<br>Iran (Islamic Republic of)                                                                                   | Beyrem, Jebri<br>PHD<br>LOCEAN<br>France                                                                                                              |

|                                                                                                                                                                                              |                                                                                                                                                                  |                                                                                                                          |
|----------------------------------------------------------------------------------------------------------------------------------------------------------------------------------------------|------------------------------------------------------------------------------------------------------------------------------------------------------------------|--------------------------------------------------------------------------------------------------------------------------|
| Beyschlag, Joachim<br>Grad student; plant ecology<br>Oldenburg University<br>Germany                                                                                                         | Bezemer, T. Martijn<br>Professor in ecology of plant microbe insect interactions<br>netherlands institute of ecology (NIOO-KNAW)<br>Netherlands (the)            | Bezerra, Alexandra M.R.<br>Researcher/mammalogy<br>Museu Paraense Emilio Goeldi<br>Brazil                                |
| Bezerra, Tania_Nara *<br>Marine Biology<br>Ghent University<br>Belgium                                                                                                                       | Bhalerao, Amol<br>Scientist<br>Indian Council of Agricultural Research<br>Germany                                                                                | Bhalla, Ravinder<br>Sr. Doctoral Fellow, Ecologist<br>Foundation for Ecological Research, Advocacy and Learning<br>India |
| Bharati, Luna<br>Principal Researcher<br>International Water Management Institute<br>Nepal                                                                                                   | Bhatta, Chet<br>PhD Candidate<br>University of Kansas<br>United States of America (the)                                                                          | BHATTA, RAMACHANDRA<br>EMERITUS PROFESSOR<br>ICAR-COLLEGE OF FISHERIES, MANGALORE<br>India                               |
| Bianchi, Andrea<br>PhD student, mathematics<br>Universität Bonn<br>Germany                                                                                                                   | Bianchi, Carlo Nike<br>Professor of Ecology<br>University of Genoa<br>Italy                                                                                      | Bianchi, Carlos<br>Professor<br>Universidade Federal de Goiás<br>Brazil                                                  |
| Bianchi, Rita de Cassia<br>Professor<br>Universidade Estadual Paulista "Júlio de Mesquita Filho"<br>Brazil                                                                                   | BIANCHINI, ADALTO<br>FULL PROFESSOR - PHYSIOLOGY AND ECOTOXICOLOGY<br>UNIVERSIDADE FEDERAL DO RIO GRANDE - FURG<br>Brazil                                        | Bianchini Jr., Irineu<br>Professor/Limnology<br>Universidade Federal de São Carlos<br>Brazil                             |
| Biaou, Samadori S. H.<br>Associate Professor, Forest Ecology and Resource Conservation<br>Laboratoire d'Ecologie, de Botanique et de Biologie Vegetale (LEB), Universite de Parakou<br>Benin | Biard, Clotilde<br>Associate Professor<br>Pierre & Marie Curie Paris 6 University<br>France                                                                      | Biber-Freudenberger, Lisa<br>Senior Reseracher<br>Center for Development Research<br>Germany                             |
| Bicalho, Simone<br>Professor Environment management and environmental impact<br>Faculdade de Tecnologia de Indaiatuba-FATEC-ID<br>Brazil                                                     | Bicca-Marques, Júlio César<br>Professor<br>Pontifícia Universidade Católica do Rio Grande do Sul (Pontifical Catholic University of Rio Grande do Sul)<br>Brazil | Bick, Andreas *<br>Curator<br>University of Rostock<br>Germany                                                           |
| Bickel, Daniel<br>Research Scientist<br>Australian Museum<br>Australia                                                                                                                       | Bickerton, Doug<br>Ecologist, Threatened Species<br>Dept Environment, Water and Natural Resources (SA)<br>Australia                                              | Bickford, David<br>Associate Professor of Biology<br>University of La Verne<br>United States of America (the)            |

|                                                                                                                                           |                                                                                                                                                 |                                                                                                                                                             |
|-------------------------------------------------------------------------------------------------------------------------------------------|-------------------------------------------------------------------------------------------------------------------------------------------------|-------------------------------------------------------------------------------------------------------------------------------------------------------------|
| Bicknell, Jake<br>Conservation Scientist<br>University of Kent<br>United Kingdom of Great Britain and Northern Ireland (the)              | Bicudo, José Eduardo<br>Professor of Physiology<br>University of Wollongong<br>Australia                                                        | Bidau, Claudio<br>Professor of Biology (retired)<br>Rio Negro National University<br>Argentina                                                              |
| Biddanda, Bopi<br>Professor of Water Resources<br>Annis Water Resources Inst., Grand Valley State Univ.<br>United States of America (the) | Biddick, Matthew<br>PhD Candidate<br>Victoria University of Wellington<br>New Zealand                                                           | Bideault, Azenor<br>PhD candidate in ecology<br>Université de Sherbrooke<br>Canada                                                                          |
| Biederman, Lori<br>Adjunct Assistant Professor; Ecology<br>Iowa State University<br>United States of America (the)                        | Biedrzycka, Aleksandra<br>Independent Researcher in Biology<br>Institute of Nature Conservatiop, Polish Academy of Sciences<br>Poland           | Biielders, Charles<br>Professor<br>Université catholique de Louvain<br>Belgium                                                                              |
| Bierbaum, Emily<br>Graduate Student - Amphibian Biology<br>Southeastern Louisiana University<br>United States of America (the)            | Biersma, Elisabeth Machteld<br>Researcher (biologist)<br>British Antarctic Survey<br>United Kingdom of Great Britain and Northern Ireland (the) | BIGATTI, GREGORIO<br>SCIENTIFIC RESEARCHER-MARINE BIOLOGY<br>IBIOMAR-CONICET<br>Argentina                                                                   |
| Biggs, Duan<br>Senior Research Fellow<br>Environmental Futures Research Institute, Griffith University<br>Australia                       | Bijnens, Karolien<br>PhD student<br>Hasselt University<br>Belgium                                                                               | Bilan, Meri<br>Research assistant, Deep-sea biology and ecology<br>IMAR<br>Portugal                                                                         |
| Bilgmann, Kerstin<br>Associate Lecturer in Evolution<br>Macquarie University<br>Australia                                                 | Billy, Vincent<br>PhD studeny<br>UBC<br>Canada                                                                                                  | Bilton, David<br>Professor of Aquatic Biology<br>University of Plymouth<br>United Kingdom of Great Britain and Northern Ireland (the)                       |
| Bimber, Russell *<br>Chemist<br>Retired after 40 years with Diamond Shamrock<br>United States of America (the)                            | Bimson, Kathryn<br>Coral Reef Conservation Coordinator<br>IUCN<br>Thailand                                                                      | Binding, Sally<br>Animal Welfare Science<br>European Association of Zoos and Aquaria<br>United Kingdom of Great Britain and Northern Ireland (the)          |
| binet, francoise<br>research director in ecology<br>CNRS<br>France                                                                        | Bineva, Velika<br>Assist. prof.<br>Prof. dr Assen Zlatarov University<br>Bulgaria                                                               | Bingham, Frederick<br>Professor, Department of Physics & Physical Oceanography<br>University of North Carolina Wilmington<br>United States of America (the) |

|                                                                                                                                               |                                                                                                                       |                                                                                                                        |
|-----------------------------------------------------------------------------------------------------------------------------------------------|-----------------------------------------------------------------------------------------------------------------------|------------------------------------------------------------------------------------------------------------------------|
| Binkley, Jessica<br>Psychologist<br>United States of America (the)                                                                            | Biondo, Cibele<br>Professor of Molecular Ecology and Conservation Genetics<br>Federal University of ABC<br>Brazil     | Bircher, Nina<br>Behavioural Ecology<br>Wageningen University<br>Netherlands (the)                                     |
| Bird, Douglas<br>Associate Professor, Director of Center for Human Ecology<br>Pennsylvania State University<br>United States of America (the) | Bird, Tania L.F.<br>PhD Ecology<br>Ben Gurion University<br>Israel                                                    | Bird, Tharina<br>Lecturer, Arachnologist<br>Botswana International University of Science and<br>Technology<br>Botswana |
| Birkeland, Charles<br>Professor Emeritus<br>University of Hawaii<br>United States of America (the)                                            | Birkhead, Roger<br>Herpetology<br>Auburn University<br>United States of America (the)                                 | Birkhead, William<br>Professor Emeritus<br>Columbus State University<br>United States of America (the)                 |
| Birkhead, William S.<br>Professor Emeritus of Biology<br>Columbus State University<br>United States of America (the)                          | Birrell, Neil<br>Entomology<br>University of Auckland<br>New Zealand                                                  | Bisbing, Sarah<br>Professor<br>University of Nevada - Reno<br>United States of America (the)                           |
| Bisht, Tarun<br>PhD Student<br>IGB Berlin<br>Germany                                                                                          | Bisiak, Francesco<br>PhD fellow, Structural and molecular biology<br>EMBL Grenoble<br>France                          | Bissessur, Prishnee<br>PhD student in Conservation<br>University of Mauritius<br>Mauritius                             |
| Bisset, Stewart<br>Scientist, Animal Health Research (retired)<br>AgResearch, Hopkirk Research Institute<br>New Zealand                       | Bisson, Mary<br>Professor of Biological Sciences<br>University at Buffalo, New York<br>United States of America (the) | Bisson, Terrence<br>Prof. Dept. of Math. and Statistics<br>Canisius College<br>United States of America (the)          |
| Bist, Mahesh Raj<br>M.Sc. Student<br>Nepal                                                                                                    | Biswas, Asim<br>Assistant Professor<br>University of Guelph<br>Canada                                                 | Bitá-Nicolae, Claudia<br>Scientific Researcher/Ecology<br>Institute of Biology<br>Romania                              |
| Bitar, Lorena<br>Ornithology<br>Museu Paraense Emilio Goeldi (MPEG)<br>Brazil                                                                 | Biudes, Marcelo<br>Professor<br>Federal University of Mato Grosso<br>Brazil                                           | Bizzo, Nelio<br>Scientific Coordinator - EDEVO-Darwin<br>University of São Paulo<br>Brazil                             |
| Bjarnadóttir, Kristín<br>Professor Emerita<br>Iceland                                                                                         | Björk, Johannes R<br>Postdoc<br>University of Notre Dame<br>United States of America (the)                            | Björn, Lars Olof<br>Professor Emeritus, Biology<br>Lund University, Dept. of Biology<br>Sweden                         |

|                                                                                                               |                                                                                                                                                                                                                         |                                                                                                                                                                     |
|---------------------------------------------------------------------------------------------------------------|-------------------------------------------------------------------------------------------------------------------------------------------------------------------------------------------------------------------------|---------------------------------------------------------------------------------------------------------------------------------------------------------------------|
| Blacher, Pierre<br>Postdoctoral researcher<br>University of Lausanne<br>Switzerland                           | Black, Morgan<br>Marine Ecology<br>University of Victoria<br>Canada                                                                                                                                                     | Black, Patricia<br>Associate Professor, Animal Behavior<br>Facultad de Ciencias Naturales e Instituto Miguel Lillo,<br>Universidad Nacional de Tucuman<br>Argentina |
| Black, Robert<br>Ecology<br>Australia                                                                         | Black, Scott<br>Ecologist<br>Xerces Society for Invertebrate Conservation<br>United States of America (the)                                                                                                             | Blackburn, Michele<br>Conservation Biologist<br>The Xerces Society<br>United States of America (the)                                                                |
| Blackie, Helen<br>Environmental scientist<br>New Zealand                                                      | Blackmore, Andrew *<br>Manager Protected Area Planning and Integrated<br>Environmental Management<br>Ezemvelo KZN Wildlife<br>South Africa                                                                              | Blackmore, Stephen<br>Queen's Botanist and Honorary Fellow<br>Royal Botanic Garden Edinburgh<br>United Kingdom of Great Britain and Northern Ireland<br>(the)       |
| Blackwell, Eric<br>Associate Professor of Biology<br>Delta State University<br>United States of America (the) | Blackwood, Christopher<br>Professor<br>Department of Biological Sciences, Kent State University<br>United States of America (the)                                                                                       | Bladon, Andrew<br>Conservation Scientist<br>The Royal Society for the Protection of Birds<br>United Kingdom of Great Britain and Northern Ireland<br>(the)          |
| Blaha, Ludek<br>Professor, Environmental Toxicology<br>Masaryk University, Brno<br>Czech Republic (the)       | Blair, Gordon<br>Distinguished Professor and EPSRC Senior Fellow in<br>Digital Technology and Living with Environmental Change<br>Lancaster University<br>United Kingdom of Great Britain and Northern Ireland<br>(the) | Blais, Brian<br>PhD Student - Natural Resources and the Environment<br>University of Arizona<br>United States of America (the)                                      |
| Blaix, Cian<br>PhD candidate<br>Sant'Anna School of Advanced Studies<br>Italy                                 | Blake, David<br>Independent scholar, political ecologist<br>United Kingdom of Great Britain and Northern Ireland<br>(the)                                                                                               | Blake, Lauren<br>Fellow, Food Systems<br>Royal Veterinary College<br>United Kingdom of Great Britain and Northern Ireland<br>(the)                                  |
| Blakeway, David<br>Coral Reef Geomorphology<br>Fathom 5 Marine Research<br>Australia                          | Blanc, Lori<br>Assistant Professor of Practice<br>Virginia Tech<br>United States of America (the)                                                                                                                       | Blanchard, Jesse<br>Icrhyologist<br>Florida international university<br>United States of America (the)                                                              |

|                                                                                                                      |                                                                                                                                                                                                         |                                                                                                                           |
|----------------------------------------------------------------------------------------------------------------------|---------------------------------------------------------------------------------------------------------------------------------------------------------------------------------------------------------|---------------------------------------------------------------------------------------------------------------------------|
| Blanché, Cèsar<br>Catedràtic de Botànica, Facultat de Farmàcia<br>Universitat de Barcelona, Catalonia<br>Spain       | BLANCHET, Denis<br>Medical biologist - Parasitology & medical entomology<br>EA3593 (EPaT) & Laboratoire Hospitalier Universitaire de<br>Parasitologie du Centre Hospitalier de Cayenne<br>French Guiana | Blanchfield, Paul<br>Research Scientist<br>Freshwater Institute, Fisheries & Oceans<br>Canada                             |
| Blanchon, Paul<br>Research Scientist in Earth Science<br>National University of Mexico (UNAM)<br>Mexico              | Blanco, Ana<br>Researcher<br>Instituto Investigacion Sanitaria Hospital La Fe<br>Spain                                                                                                                  | Blanco, Guillermo<br>Researcher/ecology and conservation<br>Museo Nacional de Ciencias Naturales, CSIC<br>Spain           |
| Blanco, Juan A.<br>Distinguished Researcher, Forest Ecology<br>Universidad Publica de Navarra<br>Spain               | Blanco Pastor, José Luis<br>postdoc plant genetics<br>INRA<br>France                                                                                                                                    | Blanco-Moreno, José M.<br>Associate professor<br>University of Barcelona<br>Spain                                         |
| Blanco-Salas, José<br>researcher / Biology<br>Universidad de Extremadura<br>Spain                                    | Blandin, Agathe<br>Graduated MSc student in Marine biology and Coral reef<br>biodiversity management<br>Université Pierre et Marie Curie / École Pratique des<br>Hautes Études<br>France                | Blank, Lars M.<br>Professor of Applied Microbiology<br>RWTH Aachen University<br>Germany                                  |
| Blasdell, Kim<br>Research Scientist<br>CSIRO<br>Australia                                                            | Blasi, Daniel<br>Chemist<br>Universitat de Barcelona<br>Spain                                                                                                                                           | Blasi, Maria<br>PhD Student in Environmental Sciences<br>Lund University<br>Sweden                                        |
| Blasius, Bernd<br>Mathematical Modelling<br>University of Oldenburg<br>Germany                                       | Blaszczyk, Maryjka<br>Postdoctoral research associate, Department of<br>Anthropology<br>University of Texas at Austin<br>United States of America (the)                                                 | Blatchford, Paul<br>Postdoctoral Scientis - Gut Microbiology<br>CSIRO<br>Australia                                        |
| Blattner, Charlotte<br>Postdoctoral Fellow<br>Queen's University<br>Canada                                           | Blaustein, Jeffrey<br>Professor Emeritus Neuroscience<br>University of Massachusetts<br>United States of America (the)                                                                                  | Blechs Schmidt, Gotlind<br>Geographer<br>Mountain Wilderness International, Mountain<br>Wilderness Deutschland<br>Germany |
| Blersch, David<br>Assistant Professor, Biosystems Engineering<br>Auburn University<br>United States of America (the) | Blevins, Maria<br>Assistant Professor, Environmental Communication<br>Utah Valley University<br>United States of America (the)                                                                          | Blew, Jan<br>Biologist, Project Manager<br>Planning Company<br>Germany                                                    |

|                                                                                                                 |                                                                                                                                                           |                                                                                                                                 |
|-----------------------------------------------------------------------------------------------------------------|-----------------------------------------------------------------------------------------------------------------------------------------------------------|---------------------------------------------------------------------------------------------------------------------------------|
| Bleyhl, Benjamin<br>Humboldt-University Berlin<br>Germany                                                       | Blicharska, Malgorzata<br>Senior Lecturer, Natural Resources and Sustainable<br>Development<br>Department of Earth Sciences, Uppsala University<br>Sweden | Bliege Bird, Rebecca<br>Professor of Anthropology<br>Pennsylvania State University<br>United States of America (the)            |
| Blight, Olivier<br>Assistant professor<br>University of Avignon<br>France                                       | Blinge, Anna<br>Sweden                                                                                                                                    | Bliss, Sam<br>PhD Student, Gund Institute for Environment<br>University of Vermont<br>United States of America (the)            |
| Block, Svenja<br>PhD student Plant Ecology<br>University of Tübingen<br>Germany                                 | Block, Theadora<br>PhD student, Ecology and Evolutionary Biology<br>University of California Santa Cruz<br>United States of America (the)                 | Blois, Jessica<br>Assistant Professor<br>University of California, Merced<br>United States of America (the)                     |
| Blok, Ebe<br>MSc Industrial Ecology<br>TU Delft<br>Netherlands (the)                                            | Blom, Allard<br>United States of America (the)                                                                                                            | Blom, Izak<br>Plant Ecologist<br>University of Pretoria<br>South Africa                                                         |
| Blommaert, Julie<br>PhD Student<br>University of Innsbruck<br>Austria                                           | Blomquist, Anders<br>Nature reserve manager<br>City of Stockholm<br>Sweden                                                                                | Blonder, Benjamin<br>Assistant professor, School of Life Sciences<br>Arizona State University<br>United States of America (the) |
| Blondet, Leo<br>Student<br>CSIRO<br>France                                                                      | Blouin-Demers, Gabriel<br>Full Professor of Ecology<br>University of Ottawa<br>Canada                                                                     | Blue-Fox, Josie<br>Sr. Research Associate Community Engagement<br>San Diego Zoo Global<br>United States of America (the)        |
| Blum, Brett<br>Research Specialist; wildlife/ecology<br>University of Arizona<br>United States of America (the) | Blum, Christian<br>PhD Student of Biology<br>University of Vienna<br>Austria                                                                              | Blumstein, Daniel<br>Professor<br>University of California Los Angeles<br>United States of America (the)                        |
| Blyth, David<br>PhD<br>Imperial College London<br>United Kingdom of Great Britain and Northern Ireland<br>(the) | Boadle, David<br>Acting site manager/Instrument tech/Optical<br>oceanography<br>Australia                                                                 | Boakye, Mickey<br>Research Assistant<br>Forestry Research Institute of Ghana<br>Ghana                                           |
| Boaretto, Elisabetta<br>Israel                                                                                  | Boavida, Joana<br>Post-doc, Marine Biologist<br>Ifremer<br>France                                                                                         | Boberek, Jar<br>Molecular Microbiology<br>Poland                                                                                |



|                                                                                                                                                       |                                                                                                                                                            |                                                                                                                                                                           |
|-------------------------------------------------------------------------------------------------------------------------------------------------------|------------------------------------------------------------------------------------------------------------------------------------------------------------|---------------------------------------------------------------------------------------------------------------------------------------------------------------------------|
| Bobiwash, Kyle<br>PhD Candidate<br>Simon Fraser University<br>Canada                                                                                  | Bobo, Kadiri Serge<br>Associate Professor - Conservation Biologist<br>Department of Forestry, FASA, University of Dschang<br>Cameroon                      | Bobo, Lucien<br>Student Assistant in Energy Economics and Regulation<br>Danmarks Tekniske Universitet<br>Denmark                                                          |
| Boccarella, Giorgio<br>Student in biological science<br>Università di Bari Aldo Moro<br>Italy                                                         | Bocchiglieri, Adriana<br>University of Sergipe<br>Brazil                                                                                                   | Boch, Steffen<br>Ecologist<br>Swiss Federal Research Institute WSL<br>Switzerland                                                                                         |
| Bock, Philip<br>Geology, Palenotology, marine biology; Honorary Associate<br>Melbourne Museum<br>Australia                                            | Bocklet, Johanna<br>Junior Researcher in Energy Economics<br>Univeristy of Cologne<br>Germany                                                              | Boden, Rich<br>Associate Professor of Microbial Physiology and Taxonomy<br>University of Plymouth<br>United Kingdom of Great Britain and Northern Ireland (the)           |
| Bodey, Thomas<br>Research Fellow<br>University of Exeter<br>United Kingdom of Great Britain and Northern Ireland (the)                                | Bodin, Stéphanie<br>PhD Student (Palaeoecology/Anthracology)<br>Institut des Sciences de l'Evolution de Montpellier<br>France                              | Bodur, Yasemin<br>graduate student, Marine Ecology<br>University of Bremen<br>Germany                                                                                     |
| Boege-Tobin, Deborah<br>Professor<br>University of Alaska Anchorage - Kenai Peninsula College - Kachemak Bay Campus<br>United States of America (the) | Boehmer, Hans Juergen<br>Professor of Biogeography, HOS of the School of Geography, Earth Science & Environment<br>University of the South Pacific<br>Fiji | boer, joop<br>biologist, retired<br>no more<br>Netherlands (the)                                                                                                          |
| Boero, Ferdinando<br>Professor of Zoology<br>University of Salento<br>Italy                                                                           | Boersema, Jan J.<br>Professor: Principles of Environmental Sciences<br>CML Leiden University<br>Netherlands (the)                                          | Boersma, Dee<br>Director Center for Ecosystem Sentinels, Wadsworth<br>Endowed Chair in Conservation Science<br>University of WASHINGTON<br>United States of America (the) |
| Boersma, Kate<br>Assistant professor, Ecology<br>University of San Diego<br>United States of America (the)                                            | Boev, Zlatozar<br>Prof., DSc. Zoology<br>National Museum of Natural History<br>Bulgaria                                                                    | Boev, Zlatozar<br>prof., Dsc.<br>Natuinal Museum of Natural History<br>Bulgaria                                                                                           |
| Bogan, Arthur<br>Research Curator of Mollusks<br>North Carolina Museum of Natural Sciences<br>United States of America (the)                          | Bogdanova, Anna<br>University of Zurich<br>Switzerland                                                                                                     | Bogdanović, Milica<br>Research Associate<br>Institute for Biological Research "Siniša Stanković"<br>Serbia                                                                |

|                                                                                                                                                                                    |                                                                                                    |                                                                                                                                                        |
|------------------------------------------------------------------------------------------------------------------------------------------------------------------------------------|----------------------------------------------------------------------------------------------------|--------------------------------------------------------------------------------------------------------------------------------------------------------|
| Bogdanowicz, Wieslaw<br>Professor - head of department/biology<br>Museum and Institute of Zoology, Polish Academy of Sciences<br>Poland                                            | Bogeat-Triboulot, Marie-Béatrice<br>Researcher, tree ecophysiolgist<br>INRA<br>France              | Boggan, Amy<br>Assistant Professor of Psychology<br>Young Harris College<br>United States of America (the)                                             |
| Bogin, Barry<br>Professor of Biological Anthropology<br>Loughborough University<br>United Kingdom of Great Britain and Northern Ireland (the)                                      | Bogle, Natalia<br>Environmental Management<br>University of Auckland<br>New Zealand                | Bogner, Christina<br>Environmental scientist<br>University of Bayreuth<br>Germany                                                                      |
| Bogo, Gherardo<br>Research Fellow - Biologist/Entomologist<br>University of Bologna<br>Italy                                                                                       | Bohle, Martin<br>Research Fellow<br>Ronin Institute<br>Belgium                                     | Böhmer, Karl-Oswald<br>Historian, Director of the Environmental Education Diploma<br>Universidad Alberto Hurtado<br>Chile                              |
| Bohn, Katrin<br>Marine Ecology Specialist in marine monitoring, evidence and condition assessment<br>Natural England<br>United Kingdom of Great Britain and Northern Ireland (the) | Bohn, Sandra<br>Conservation Genetics<br>Oregon State University<br>United States of America (the) | Bohnemeyer, Juergen<br>Associate Professor of Linguistics<br>University at Buffalo, The State University of New York<br>United States of America (the) |
| Boinot, Sébastien<br>PhD Student<br>INRA Montpellier<br>France                                                                                                                     | Bois, Frederic<br>Research Director<br>INERIS<br>France                                            | Boissonnet, Tom<br>PhD student in Neuroscience<br>European Molecular Biology Laboratory<br>Italy                                                       |
| Boix, Dani<br>Associate professor (Ecology)<br>Inst. of Aquatic Ecology & Dept. of Environmental Sciences; University of Girona<br>Spain                                           | Bojorquez, Jesus<br>Phd student<br>Universidad Nacional Autónoma de México<br>Mexico               | Bol, Tamar<br>Msc. Student Environment and Resource Management<br>Vrije Universiteit Amsterdam<br>Netherlands (the)                                    |
| BOLL, PITER<br>PhD Student of Biology<br>Universidade do Vale do Rio dos Sinos<br>Brazil                                                                                           | Bôlla, Daniela<br>Msc. student<br>National Institute for Amazonian Research<br>Brazil              | Bollache, Loic<br>Professor<br>Université Bourgogne Franche Comté<br>France                                                                            |
| Bollaert, Johan<br>Phd student. Runology<br>Iln, universitetet i Oslo<br>Norway                                                                                                    | Bolland, Robert<br>Biologist<br>U Maryland, Asian Div / Retired<br>United States of America (the)  | Bolson, Mônica<br>Student<br>UNESP<br>Brazil                                                                                                           |

|                                                                                                                                                                |                                                                                                                                                            |                                                                                                                                                                          |
|----------------------------------------------------------------------------------------------------------------------------------------------------------------|------------------------------------------------------------------------------------------------------------------------------------------------------------|--------------------------------------------------------------------------------------------------------------------------------------------------------------------------|
| Bolt, Clay<br>Natural History Photographer, Communications<br>World Wildlife Fund<br>United States of America (the)                                            | Bolte, Katherine<br>Restoration Ecologist<br>The Xerces Society for Invertebrate Conservation<br>United States of America (the)                            | Bolton, Peri<br>Macquarie University<br>Australia                                                                                                                        |
| Bolzani, Vanderlan<br>Full Professor/Chemistry<br>Institute of Chemistry, São paulo State University, SP<br>Brazil                                             | Boman, Erik<br>PhD Candidate / Fisheries biology and Marine Ecology<br>Wageningen University<br>Bonaire, Sint Eustatius and Saba                           | Bonacic, Cristian<br>Professor<br>Pontificia Universidad Católica de Chile<br>Chile                                                                                      |
| Bonar, Scott<br>Professor, Natural Resources<br>University of Arizona<br>United States of America (the)                                                        | Bonari, Gianmaria<br>Post-doc researcher in Botany, Vegetation Science<br>University of Siena<br>Italy                                                     | Bonatti, Taís<br>Lecturer<br>Paulista University<br>Brazil                                                                                                               |
| Bonay, Pedro<br>Professor of Biochemistry<br>Universidad Autonoma de Madrid<br>Spain                                                                           | Boncompagni, Eric<br>Associated professor<br>Université Cote d'azur<br>France                                                                              | Boncourt, Etienne<br>PhD student<br>University of Grenoble Alpes, Irstea, UR EMGR, 2, rue de<br>la Papeterie-BP 76, F-38402 St-Martin-d'Hères Cedex,<br>France<br>France |
| Bond, Alexander<br>Senior Conservation Scientist<br>Royal Society for the Protection of Birds<br>United Kingdom of Great Britain and Northern Ireland<br>(the) | Bond, Will<br>Member<br>Chartered Institute of Ecological and Environmental<br>Management<br>United Kingdom of Great Britain and Northern Ireland<br>(the) | Bonello, Guido<br>Sea Sciences PhD Student<br>Università degli Studi di Genova<br>Italy                                                                                  |
| BONET, ANDREU<br>Ecologist<br>Universidad de Alicante<br>Spain                                                                                                 | Bonfil, Consuelo<br>Full time professor Department of Ecology and natural<br>resources<br>Universidad nacional autónoma de México<br>Mexico                | Bongers, Frans<br>Professor Tropical Forest Ecology<br>Wageningen University & Research<br>Netherlands (the)                                                             |
| Bonhomme, François<br>Directeur de Recherches, Evolutionary Sciences<br>Centre National de la Recherche Scientifique<br>France                                 | Bonhomme, Maxime<br>Associate Professor<br>University of Toulouse<br>France                                                                                | Bonhomme, Vincent<br>Evolutionary sciences<br>University of Montpellier<br>France                                                                                        |
| Bonilla-Barbosa, Jaime<br>PhD. Biologist<br>Universidad Autónoma del Estado de Morelos<br>Mexico                                                               | Bonis, Anne<br>community ecology<br>CNRS<br>France                                                                                                         | Bonisoli-Alquati, Andrea<br>Assistant Professor<br>California State Polytechnic University, Pomona<br>United States of America (the)                                     |

|                                                                                                                                                                                                                             |                                                                                                                                                               |                                                                                                                                                       |
|-----------------------------------------------------------------------------------------------------------------------------------------------------------------------------------------------------------------------------|---------------------------------------------------------------------------------------------------------------------------------------------------------------|-------------------------------------------------------------------------------------------------------------------------------------------------------|
| Bonjorne de Almeida, Lilian<br>Environmental Analyst   PhD Student<br>Research Center for Carnivore Mammals<br>Conservation/Instituto Chico Mendes de Conservação da<br>Biodiversidade (CENAP/ICMBio)   SUNY/ ESF<br>Brazil | Bonkowski, Michael<br>Professor of Terrestrial Ecology<br>University of Cologne<br>Germany                                                                    | Bonmatin, Jean-Marc<br>Researcher<br>Centre National de la Recherche Scientifique<br>France                                                           |
| Bonnaud, Elsa<br>Assistant Professor<br>Paris south University<br>France                                                                                                                                                    | Bonne, Jean-Louis<br>Post-doctorant, meteorologie<br>Alfred Wegener Institute, Bremerhaven<br>Germany                                                         | Bonneaud, Camille<br>Senior Lecturer in Evolutionary Biology<br>University of Exeter<br>United Kingdom of Great Britain and Northern Ireland<br>(the) |
| Bonnet, Pierre<br>PhD, Botany<br>CIRAD<br>France                                                                                                                                                                            | BONNIN, Marie<br>Research Director<br>French Research Institute for Development (IRD), LEMAR-<br>IUEM<br>France                                               | Bonnot, Nadège<br>Postdoctoral researcher<br>Swedish University of Agricultural Sciences<br>Sweden                                                    |
| Bonsdorff, Erik<br>Professor<br>Åbo Akademi University<br>Finland                                                                                                                                                           | Bontadina, Fabio<br>PhD<br>SWILD - Urban Ecology & Wildlife Research<br>Switzerland                                                                           | Bontemps, Sophie<br>Dr. in remote sensing for environment<br>Université catholique de Louvain<br>Belgium                                              |
| Bonventre, Peter<br>Mathematician<br>University of Virginia<br>United States of America (the)                                                                                                                               | Bonvicino, Marcelo<br>Masters student/Music - Soundscape ecology researcher<br>Paris 8<br>France                                                              | Bonzi, Alejandro<br>Investigador<br>Paraguay                                                                                                          |
| Boogert, Neeltje<br>Royal Society Dorothy Hodgkin Research Fellow in<br>Behavioural Ecology<br>University of Exeter<br>United Kingdom of Great Britain and Northern Ireland<br>(the)                                        | Boom, Brian<br>Vice President for Conservation Strategy<br>New York Botanical Garden<br>United States of America (the)                                        | Boom, Michiel P.<br>PhD student Migration Ecology<br>NIOO-KNAW<br>Netherlands (the)                                                                   |
| Boone, Karie<br>PhD Human Geograpy<br>United States of America (the)                                                                                                                                                        | Boone, Michelle<br>Associate Professor Ecology<br>Miami University<br>United States of America (the)                                                          | Boonstra, Michelle<br>Marine biologist<br>Netherlands (the)                                                                                           |
| Boonstra, Riudy *<br>Professor, Ecology and Evolution. & Physiology<br>University of Toronto<br>Canada                                                                                                                      | BOQUETE SEOANE, MARIA TERESA<br>Postdoctoral Researcher/Ecological Epigenetics<br>University of South Florida/ Estación Biológica de Doñana-<br>CSIC<br>Spain | Boquiren, Rowena<br>Professor/ Social Science<br>University of the Philippines Baguio<br>Philippines (the)                                            |

|                                                                                                                                 |                                                                                                                                                                                     |                                                                                                                                      |
|---------------------------------------------------------------------------------------------------------------------------------|-------------------------------------------------------------------------------------------------------------------------------------------------------------------------------------|--------------------------------------------------------------------------------------------------------------------------------------|
| Borba, Gabriel<br>Master's degree student<br>INPA<br>Brazil                                                                     | Borcherding, Rainer<br>Biodiversity specialist<br>Schutzstation Wattenmeer (NGO)<br>Germany                                                                                         | Borda de Água, Luís<br>Portugal                                                                                                      |
| Borda-de-Água, Luís<br>Ecology<br>Portugal                                                                                      | Bordier, Célia<br>PhD Student<br>INRA<br>France                                                                                                                                     | Bordin, Luís Henrique<br>Oceanography / Marine Biogeochemistry<br>Univerisdade Federal de Santa Catarina<br>Brazil                   |
| Borg, Josefin<br>PhD Student, Organizing for sustainable development<br>Chalmers University of Technology<br>Sweden             | Borg, Joseph A<br>Associate Professor and Head of Department<br>Department of Biology, Faculty of Science, University of<br>Malta<br>Malta                                          | Borga, Marco<br>Professor, Forest Hydrology<br>University of Padova<br>Italy                                                         |
| Borgardt, Timothy<br>Biology Graduate Student<br>Southeastern Louisiana University<br>United States of America (the)            | Borges, João Carlos Gomes<br>Veterinary<br>Fundação Mamíferos Aquáticos<br>Brazil                                                                                                   | Borges, Julio<br>Professor<br>São Carlos Institute of Chemistry, USP<br>Brazil                                                       |
| Borges Martins, Luiz Felipe<br>Professor/Environmental Management<br>Federal Insitute of São Paulo - Campus São Roque<br>Brazil | Borges Pedro, João Paulo<br>Rural Sanitation Researcher<br>Mamirauá Institute for Sustainable Development<br>Brazil                                                                 | Boriachek, Kseniia *<br>PhD<br>Griffith University<br>Australia                                                                      |
| Borja, Angel<br>Principal Researcher<br>AZTI<br>Spain                                                                           | Borkent, Christopher<br>Postdoctoral researcher - Entomology<br>University of California, Davis/ California State Collection<br>of Arthropods<br>Canada                             | BORNE, Frederic<br>Researcher in Remote Sensing and GIS<br>CIRAD<br>France                                                           |
| Bornman, Riana<br>Senior Research Professor<br>University of Pretoria<br>South Africa                                           | Borodin, Pavel<br>Head of the Lab<br>Institute of Cytology and Genetics, Siberian Department<br>of Russian Academy of Sciences<br>Russian Federation (the)                          | Borowicz, Victoria<br>Assistant Professor of Plant Ecology<br>Illinois State University<br>United States of America (the)            |
| Borowiec, Brittney<br>PhD Candidate<br>McMaster University<br>Canada                                                            | Borowiec, Nicolas<br>Entomology<br>INRA<br>France                                                                                                                                   | Borowski, John F<br>Environmental Biologist/Env. Educator/35 years<br>4 Highschools over my career<br>United States of America (the) |
| Borowy, Dorothy<br>PhD Candidate<br>University of Maryland Baltimore County<br>United States of America (the)                   | Borras-Chavez, Renato<br>Phd Student and Marine Biologist of the Chilean Antarctic<br>Institute<br>Pontifical Catholic University of Chile/ Chilean Antarctic<br>Institute<br>Chile | Borregaard, Michael<br>Assistant Professor, Ecology<br>Natural History Museum of Denmark<br>Denmark                                  |

|                                                                                                                                         |                                                                                                                                                  |                                                                                                                          |
|-----------------------------------------------------------------------------------------------------------------------------------------|--------------------------------------------------------------------------------------------------------------------------------------------------|--------------------------------------------------------------------------------------------------------------------------|
| Borrego, Carles<br>Research Professor<br>Catalan Institute for Water Research (ICRA)<br>Spain                                           | Borrell, James<br>Research Fellow Tropical Ecology<br>Royal Botanic Gardens kew<br>United Kingdom of Great Britain and Northern Ireland<br>(the) | Borrelle, Stephanie<br>Seabird Island Ecologist<br>Auckland University of Technology<br>New Zealand                      |
| Borremans, Benny<br>Postdoctoral researcher, Disease Ecology<br>University of California, Los Angeles<br>United States of America (the) | Borrmann, Annika<br>Scientist Biochemistry<br>Germany                                                                                            | Borruat, Roxane<br>Marine biology (MSc.)<br>Switzerland                                                                  |
| Borsellino, Chiara<br>Italy                                                                                                             | Bortolotti, Laura<br>Researcher<br>CREA - Research Centre for Agriculture and Environment<br>Italy                                               | Bosch, Jordi<br>Researcher<br>Centre for Ecological Research and Forestry Applications,<br>Barcelona<br>Spain            |
| Bosco, Augustine Jerard<br>Principal Scientist and Head Div.of Horticulture and<br>Forestry<br>ICAR-CIARI<br>India                      | Bosco, Estevão<br>Postdoctoral researcher/Sociology<br>University of São Paulo<br>Brazil                                                         | Bosco, Joseph<br>Research Associate, Anthropology<br>Washington University in St Louis<br>United States of America (the) |
| Boscolo, Danilo<br>Professor of Landscape Ecology<br>University of São Paulo<br>Brazil                                                  | boscolo, odara<br>professor of ethnobotany<br>universidade federal fluminense<br>Brazil                                                          | Bosi, Umberto<br>PhD applied Mathematics<br>Inria Bordeaux<br>France                                                     |
| BOSMA, Roel<br>Animal Science<br>Wageningen University<br>Netherlands (the)                                                             | Bosomworth, Karyn<br>Vice Chancellor's Post-Doctoral Research Fellows<br>RMIT University<br>Australia                                            | Boss, Emmanuel<br>Professor of Oceanography<br>University of Maine<br>United States of America (the)                     |
| Bosse, Anthony<br>Postdoc<br>University of Bergen<br>Norway                                                                             | Bostelmann, Enrique<br>Paleontologist<br>Instituto de Ciencias de la Tierra, Universidad Austral de<br>Chile<br>Chile                            | Boston, Emma<br>Ecologist<br>United Kingdom of Great Britain and Northern Ireland<br>(the)                               |
| Botella Cruz, María<br>PhD student in Ecology<br>University of Murcia<br>Spain                                                          | Botero, Carlos A.<br>Assistant Professor<br>Washington University in Saint Louis<br>United States of America (the)                               | Botero, Eric<br>Biologist<br>university of the Andes<br>Colombia                                                         |
| Botero, Sebastian<br>PhD Student of Biological Sciences<br>University of Nebraska<br>Colombia                                           | Botero, Sergio<br>Postdoctoral associate<br>Rockefeller University<br>United States of America (the)                                             | Botha, Hannes<br>Herpetofauna Scientist<br>Mpumalanga Tourism and Parks Agency<br>South Africa                           |

|                                                                                                                                     |                                                                                                                                                                                          |                                                                                                                                  |
|-------------------------------------------------------------------------------------------------------------------------------------|------------------------------------------------------------------------------------------------------------------------------------------------------------------------------------------|----------------------------------------------------------------------------------------------------------------------------------|
| Botha, Michael<br>South Africa                                                                                                      | Botha, Thomas<br>Masters student in Marine Biology<br>University of Cape Town<br>South Africa                                                                                            | Bothwell, Al<br>Professor of Immunobiology<br>Yale Medical School<br>United States of America (the)                              |
| Botías, Cristina<br>Research Fellow (Ecology)<br>EBD-CSIC<br>Spain                                                                  | Boto, Luis<br>Research Scientist<br>Museo Nacional Ciencias Naturales (Spanish Research Council. CSIC)<br>Spain                                                                          | Bötsch, Yves<br>Switzerland                                                                                                      |
| Bottalico, Antonella<br>Researcher<br>Department of Biology - University of Bari<br>Italy                                           | BOTTARI, GIOVANNI<br>Universidad Autónoma de Madrid<br>Spain                                                                                                                             | Botterell, Zara<br>PhD student- biosciences<br>University of Essex<br>United Kingdom of Great Britain and Northern Ireland (the) |
| Bottin, Marius<br>Postdoc in vegetation ecology<br>Universidad del Rosario<br>Colombia                                              | Botting, Jennifer<br>Primatologist<br>Smithsonian Institution<br>United States of America (the)                                                                                          | Bottino, Flavia<br>Brazil                                                                                                        |
| Bou, Jordi<br>PhD student - Botany<br>Institute of the Environment & Dept. of Environmental Sciences; University of Girona<br>Spain | Bouarakia, Oussama<br>PhD Researcher in Zoology and Genetics<br>Faculty of Sciences, Mohammed V University in Rabat<br>Morocco                                                           | Bouchard, Bertrand<br>Wildlife veterinarian and researcher<br>Centre National de la Recherche Scientifique<br>France             |
| Bouchard, Peter<br>Research Assistant<br>University of Minnesota Duluth<br>United States of America (the)                           | Bouchebti, Sofia<br>Postdoc<br>B. Triwaks Bee Research - Center Department of Entomology, The Hebrew University of Jerusalem Faculty of Agriculture, Food, and the Environment<br>Israel | Bouchemousse, Sarah *<br>PhD<br>Switzerland                                                                                      |
| Boucher, Douglas<br>Scientific Adviser<br>Union of Concerned Scientists<br>United States of America (the)                           | Boucher, Florian C.<br>Postdoctoral researcher in Evolution<br>Stellenbosch University<br>South Africa                                                                                   | Boucher, Jean<br>United States of America (the)                                                                                  |
| Boucher, Jean<br>Assistant Professor<br>Michigan State University<br>United States of America (the)                                 | Boucher, Olivier<br>Directeur de Recherche au CNRS<br>Institut Pierre-Simon Laplace<br>France                                                                                            | Boucherie, Palmyre, H.<br>Post-doctoral researcher in Ethology<br>University of Vienna<br>Austria                                |
| Bouchet, Phil<br>Postdoctoral Research Fellow<br>University of Western Australia<br>Australia                                       | Bouchez, Yann<br>Student<br>Université du Québec à Rimouski<br>Canada                                                                                                                    | Bouda, Martin<br>Post-doctoral Researcher<br>Yale University<br>Czech Republic (the)                                             |

|                                                                                                                                                                         |                                                                                                                     |                                                                                                                               |
|-------------------------------------------------------------------------------------------------------------------------------------------------------------------------|---------------------------------------------------------------------------------------------------------------------|-------------------------------------------------------------------------------------------------------------------------------|
| Boudriot, Elisabeth<br>Student of Medicine<br>TU Dresden<br>Germany                                                                                                     | Boufford, David<br>Research Scientist<br>Harvard University Herbaria<br>United States of America (the)              | Boulange, Alain<br>Professor Biotechnology<br>Universidade Eduardo Mondlane<br>France                                         |
| Boulding, Elizabeth<br>Professor Integrative Biology<br>University of Guelph<br>Canada                                                                                  | Bouley, Paola<br>Associate Director, Lion Conservation<br>Gorongosa National Park<br>Mozambique                     | Bouma, Esther<br>Ethology / Educational Sciences<br>University of Groningen<br>Netherlands (the)                              |
| Bouman, Ferry<br>botany<br>IBED, University of Amsterdam<br>Netherlands (the)                                                                                           | Bouman, Roderick<br>PhD student, evolutionary biology<br>Hortus botanicus Leiden<br>Netherlands (the)               | Bouni, Christophe<br>Dr Economic Sciences<br>AScA<br>France                                                                   |
| Bourdelais, Andrea<br>Research Associate Professor/Marine Natural Products<br>Chemistry<br>University of North Carolina at Wilmington<br>United States of America (the) | Bourg, Amandine<br>Student<br>Instituto de Ecología A.C.<br>Mexico                                                  | Bourget, Malo<br>Student in International Master of Biodiversity Ecology<br>and Evolution<br>University of Rennes 1<br>France |
| Bourgine, Paul<br>Complex Systems Science<br>CS-DC UNESCO UniTwin<br>France                                                                                             | Bourgoin, Gilles<br>Associate professor in Parasitology<br>Vetagro Sup<br>France                                    | Bourhis, Yoann<br>Ecological Modelling<br>INRA<br>France                                                                      |
| Bourjea, Jérôme<br>Researcher, chef of fisheries lab<br>IFREMER<br>France                                                                                               | Bourke, Mike<br>Honorary Associate Professor<br>Australian National University<br>Australia                         | Bourlat, Sarah<br>Researcher<br>University of Gothenburg<br>Sweden                                                            |
| Bousquet, Julie<br>Consultant in Ecology, Tourism & Territorial Development<br>Coop'Conseils<br>France                                                                  | Bouwman, Hindrik<br>Lecturer (Full professor)<br>North-West University<br>South Africa                              | Bove, Claudia<br>Professor<br>Universidade Federal do Rio de Janeiro<br>Brazil                                                |
| Boveda, Agatha<br>Biologist<br>Paraguay                                                                                                                                 | Bovendorp, Ricardo<br>Postdoctoral<br>Universidade Estadual Paulista - UNESP, Departamento<br>de Ecologia<br>Brazil | Bovo, Alex<br>PhD Student<br>USP<br>Brazil                                                                                    |
| Bovo, Rafael<br>Postdoctoral researcher<br>Universidade Federal do ABC (UFABC)<br>Brazil                                                                                | Bowden, Joseph<br>Research Scientist<br>Natural Resources Canada<br>Canada                                          | Bowden-Kerby, Austin<br>Director and Chief Scientist<br>Corals for Conservation<br>Fiji                                       |



|                                                                                                                                                                               |                                                                                                                                                            |                                                                                                                                               |
|-------------------------------------------------------------------------------------------------------------------------------------------------------------------------------|------------------------------------------------------------------------------------------------------------------------------------------------------------|-----------------------------------------------------------------------------------------------------------------------------------------------|
| Bowdish, Dawn<br>Associate Professor<br>McMaster University<br>Canada                                                                                                         | Bower, Shannon<br>PhD Candidate (Biology), Fisheries Conservation<br>Carleton University<br>Canada                                                         | Bowie, Matt<br>PhD Applied Ecology and Conservation<br>University of Adelaide<br>Australia                                                    |
| Bowie, Naomi<br>Research Assistant, Environmental Sciences<br>James Cook University<br>Australia                                                                              | Bowkett, Andrew<br>Conservation Programmes Manager<br>Whitley Wildlife Conservation Trust<br>United Kingdom of Great Britain and Northern Ireland<br>(the) | Bowlby, Ed<br>Marine Biology<br>retired from NOAA<br>United States of America (the)                                                           |
| Bowles, David<br>Aquatic Program Leader, Heartland Network<br>US National Park Service<br>United States of America (the)                                                      | Bowman, David<br>Professor of Environmental Change Biology<br>University of Tasmania<br>Australia                                                          | Bowman, Randi<br>Recent BSc Graduate, Biology<br>Lewis-Clark State College<br>United States of America (the)                                  |
| Bowman, William<br>Professor, Ecology and Evolutionary Biology<br>University of Colorado<br>United States of America (the)                                                    | Bowring, Simon<br>Climate Research<br>Laboratoire des Sciences de Climat et de l'Environnement<br>(LSCE)<br>France                                         | Bowry, Claire<br>Researcher, Urban Ecology<br>University of Queensland<br>Australia                                                           |
| Bowry, Vincent<br>Sessional lecture chemistry<br>JCU<br>Australia                                                                                                             | Bowser, Carl<br>Emeritus Professor of Geosciences<br>University of Wisconsin- Madison<br>United States of America (the)                                    | Boya, Patricia<br>Researcher<br>CSIC<br>Spain                                                                                                 |
| Boyadjian, Celia H. C.<br>Postdoctoral Researcher, Archaeobotany<br>Universidade Federal do Rio de Janeiro (UFRJ)<br>Brazil                                                   | Boyd, Cecilia<br>Masters Student of Biology<br>Southeastern Louisiana University<br>United States of America (the)                                         | Boyd, Charlotte<br>Research Scientist<br>University of Washington<br>United States of America (the)                                           |
| Boyd, David<br>Associate Professor of Law, Policy, and Sustainability<br>Institute for Resources, Environment and Sustainability,<br>University of British Columbia<br>Canada | Boyer, Kathryn *<br>Fish Biologist<br>Oregon State University<br>United States of America (the)                                                            | Boyle, Alice<br>Assistant Professor, Ecology<br>Kansas State University<br>United States of America (the)                                     |
| Boyle, Jack<br>Postgraduate Researcher<br>University of Exeter<br>United Kingdom of Great Britain and Northern Ireland<br>(the)                                               | Boyle, Leila<br>Senior Tutor, Department of Statistics<br>The University of Auckland<br>New Zealand                                                        | Boyle, Michael<br>Forest Ecology and Conservation<br>Imperial College London<br>United Kingdom of Great Britain and Northern Ireland<br>(the) |
| Boyle, Michael James<br>PhD Student<br>Max Planck Institute for Evolutionary Anthropology<br>Germany                                                                          | Boyle, Sarah<br>Associate Professor, Biology<br>Rhodes College<br>United States of America (the)                                                           | Boza, Mario A.<br>Associate<br>Tropical Science Center<br>Costa Rica                                                                          |

|                                                                                                                                                           |                                                                                                                                    |                                                                                                                                         |
|-----------------------------------------------------------------------------------------------------------------------------------------------------------|------------------------------------------------------------------------------------------------------------------------------------|-----------------------------------------------------------------------------------------------------------------------------------------|
| Bozhinovska, Emilija<br>Environmental Consultant<br>Macedonia, Republic of (the former Yugoslavia)                                                        | bozinovic, francisco<br>full professor/ecological and evolutionary physiology<br>Universidad Católica de Chile<br>Chile            | Bracco, Gianangelo<br>Associate Professor of Experimental Physics<br>University of Genoa<br>Italy                                       |
| Bracey, Annie<br>Conservation Sciences (PhD student)<br>University of Minnesota<br>United States of America (the)                                         | Bracks, Igor<br>Professor<br>University of Jequitinhonha e Mucuri Valeys<br>Brazil                                                 | Bradbear, Nicola<br>Director<br>Bees for Development<br>United Kingdom of Great Britain and Northern Ireland (the)                      |
| Bradbury, Richard<br>Head of Environmental Research<br>RSPB Centre for Conservation Science<br>United Kingdom of Great Britain and Northern Ireland (the) | Bradler, Sven<br>University lecturer<br>University of Goettingen<br>Germany                                                        | Bradley, Bethany<br>Associate Professor<br>University of Massachusetts, Amherst<br>United States of America (the)                       |
| Bradley, Paul<br>University of San Diego<br>United States of America (the)                                                                                | Brady, Riley<br>PhD Student in Atmospheric & Oceanic Sciences<br>University of Colorado Boulder<br>United States of America (the)  | Braga, Daniel<br>Microbiologist<br>Friedrich Schiller University Jena / Hans Knöll Institute<br>Germany                                 |
| braga, edmundo *<br>professor<br>UNICAMP<br>Brazil                                                                                                        | Bragg, Clyde<br>VP<br>Everything Potatoes, Inc<br>United States of America (the)                                                   | Braidwood, Luke<br>PhD student, Plant Sciences<br>University of Cambridge<br>United Kingdom of Great Britain and Northern Ireland (the) |
| Braig, Henk R<br>Reader in Molecular Parasitology<br>Bangor University<br>United Kingdom of Great Britain and Northern Ireland (the)                      | Braker, Elizabeth<br>Professor of Biology<br>Occidental College<br>United States of America (the)                                  | Brambach, Fabian<br>PhD student (Botany)<br>University of Göttingen<br>Germany                                                          |
| Brämick, Uwe<br>Scientific director<br>Institute for Inland Fisheries Potsdam-Sacrow<br>Germany                                                           | Brammer, Jeremy<br>Postdoctoral Fellow<br>McGill University<br>Canada                                                              | Braña, Florentino<br>Professor, Zoology, Evolutionary Biology<br>Universidad de Oviedo<br>Spain                                         |
| Branagan, Laura<br>Biological Sciences Instructor<br>City College of San Francisco<br>United States of America (the)                                      | Branco, Vinicius<br>Astronomer<br>Insititute of Astronomy, Geophysics and Atmospheric Sciences - University of Sao Paulo<br>Brazil | Brandao, Alexandre<br>Researcher<br>Brazilian Research Institute for Neuroscience and Neurotechnology / Institute of Physics<br>Brazil  |

|                                                                                                                                                                                      |                                                                                                                      |                                                                                                                                      |
|--------------------------------------------------------------------------------------------------------------------------------------------------------------------------------------|----------------------------------------------------------------------------------------------------------------------|--------------------------------------------------------------------------------------------------------------------------------------|
| <p>Brandao, Simone Nunes<br/>Professor (Biodiversity, Climate Change,<br/>Micropalaeontology, Environmental Sciences)<br/>Universidade Federal do Rio Grande do Norte<br/>Brazil</p> | <p>Brandao Jr., Amintas<br/>Phd student and Researcher<br/>University of Wisconsin-Madison and Imazon<br/>Brazil</p> | <p>Brandell, Ellen<br/>Ecology Doctoral Student<br/>Pennsylvania State University<br/>United States of America (the)</p>             |
| <p>Brandenburger, Iris<br/>Lecturer in Consumer Science and Nutrition<br/>University of Koblenz-Landau<br/>Germany</p>                                                               | <p>Brander, Susanne<br/>Toxicologist<br/>Oregon State University<br/>United States of America (the)</p>              | <p>Brandes, Arno Fritz das Neves<br/>Professor<br/>Universidade Federal Fluminense<br/>Brazil</p>                                    |
| <p>Brandimarte, Ana Lucia<br/>Head of the Department of Ecology, Institute of<br/>BioSciences<br/>University of Sao Paulo<br/>Brazil</p>                                             | <p>Brandl, Philipp<br/>GEOMAR<br/>Germany</p>                                                                        | <p>Brandl, Simon<br/>Postdoctoral Research Fellow, Ecology<br/>Simon Fraser University<br/>Canada</p>                                |
| <p>Brandon, Darrell<br/>Plant Taxonomist, Herbarium Curator<br/>University of Memphis<br/>United States of America (the)</p>                                                         | <p>Brandorff, Gerd-Oltmann<br/>scientist in retirement<br/>Germany</p>                                               | <p>Brandt, Jodi<br/>Assistant Professor, Human Environment Systems<br/>Boise State University<br/>United States of America (the)</p> |
| <p>Brandt, LaRoy<br/>Asst Professor of Conservation Biology<br/>Lincoln Memorial University<br/>United States of America (the)</p>                                                   | <p>Brannoch, Sydney<br/>Cleveland Museum of Natural History<br/>United States of America (the)</p>                   | <p>Branquinho, Cristina<br/>Associate Professor in Ecology<br/>Faculdade de Ciências, Universidade de Lisboa,<br/>Portugal</p>       |
| <p>Branston, Gordon<br/>Environmental Health and Sustainability Practitioner<br/>Health Professions Council of South Africa<br/>South Africa</p>                                     | <p>Brantner, Emily<br/>MS in Ecology<br/>Florida International University<br/>United States of America (the)</p>     | <p>Braschi, Julie<br/>PhD student<br/>IMBE<br/>France</p>                                                                            |
| <p>Brasil, Leandro<br/>Ecologist<br/>Universidade Federal do Pará<br/>Brazil</p>                                                                                                     | <p>Bratbak, Gunnar<br/>Professor, Microbial Ecology<br/>University of Bergen<br/>Norway</p>                          | <p>Bratley, Claire<br/>Neuroscience<br/>United Kingdom of Great Britain and Northern Ireland<br/>(the)</p>                           |
| <p>Brauman, Alain<br/>Senior Scientist in soil Ecology<br/>Institut de recherche pour le Developement (IRD)<br/>France</p>                                                           | <p>Braun, Birgit<br/>Biologist, MEng Environmental Science<br/>Germany</p>                                           | <p>braun, lisa-marie<br/>PhD candidate in ecology<br/>IGB Berlin<br/>Germany</p>                                                     |
| <p>Braun, M. E.<br/>Professor<br/>SUNY-Cobleskill<br/>United States of America (the)</p>                                                                                             | <p>Braun, Matthias-Alexander<br/>Biologist<br/>Germany</p>                                                           | <p>Braun, Virginia<br/>Professor, Psychology<br/>The University of Auckland<br/>New Zealand</p>                                      |

|                                                                                                                                                                           |                                                                                                                                                               |                                                                                                                                                                    |
|---------------------------------------------------------------------------------------------------------------------------------------------------------------------------|---------------------------------------------------------------------------------------------------------------------------------------------------------------|--------------------------------------------------------------------------------------------------------------------------------------------------------------------|
| Braunbeck, Thomas<br>Associate Professor<br>University of Heidelberg<br>Germany                                                                                           | Braungardt, Charlotte<br>Associate Professor in Environmental Science<br>University of Plymouth<br>United Kingdom of Great Britain and Northern Ireland (the) | Bravin, Matthieu<br>Full researcher, Soil biogeochemistry<br>Cirad<br>France                                                                                       |
| Bravo, Iván<br>Académico Biología de la Conservación<br>Universidad Autónoma de Tlaxcala<br>Mexico                                                                        | Bravo-Utrera, Miguel Ángel<br>Técnico I+D+I<br>Estación Biológica de Doñana<br>Spain                                                                          | Brawn, Jeffrey<br>Professor and Head, Natural Resources and Environmental Sciences<br>University of Illinois at Urbana-Champaign<br>United States of America (the) |
| Bray, Rebecca<br>Collection Manager<br>Western Australian Museum<br>Australia                                                                                             | Brayne, Kitty<br>Conservation Programmes Manager<br>Blue Ventures<br>United Kingdom of Great Britain and Northern Ireland (the)                               | Braz de Lima, Marcos Gabriel<br>Forestry undergrad student<br>Universidade Federal de Lavras<br>Brazil                                                             |
| Brea-Calvo, Gloria<br>Associate Professor<br>University Pablo de Olavide<br>Spain                                                                                         | Breceda, Aurora<br>Natural Resources Management Researcher<br>Centro de Investigaciones Biológicas del Noroeste<br>Mexico                                     | Brecknell, Cohen<br>Student<br>Trinity Bay State High School<br>Australia                                                                                          |
| Breckwoldt, Annette<br>Science-stakeholder interaction processes in marine sciences<br>Alfred Wegener Institute Helmholtz Centre for Polar and Marine Research<br>Germany | Breed, Martin<br>Restoration Ecologist<br>The University of Adelaide<br>Australia                                                                             | Breeze, Mark<br>Systems Engineer<br>Private Company<br>United Kingdom of Great Britain and Northern Ireland (the)                                                  |
| Brehm, Gunnar<br>Researcher<br>Institute for Zoology and Evolutionary Biology<br>Germany                                                                                  | Breisch, Alvin<br>Herpetologist<br>SUNY College of Environmental Science and Forestry<br>Roosevelt Wild Life Station<br>United States of America (the)        | Breivik, Knut<br>Adjunct professor - Environmental Chemistry<br>University of Oslo<br>Norway                                                                       |
| Brekke, Thomas<br>Postdoctoral Research Officer, Biology<br>Bangor University<br>United Kingdom of Great Britain and Northern Ireland (the)                               | Brendonck, Luc<br>professor in aquatic ecology, biodiversity and sustainable development<br>University of Leuven<br>Belgium                                   | Brennan, John<br>Theoretical Physics<br>Maynooth University<br>Ireland                                                                                             |
| Brennan, Patricia<br>Biology<br>United States of America (the)                                                                                                            | Brenneman, William<br>Assistant Professor, Biology<br>Indiana University of PA<br>United States of America (the)                                              | Brenner, Jorge<br>Associate Director of Marine Science<br>The Nature Conservancy<br>United States of America (the)                                                 |

|                                                                                                                                                   |                                                                                                                                                                      |                                                                                                                                                                           |
|---------------------------------------------------------------------------------------------------------------------------------------------------|----------------------------------------------------------------------------------------------------------------------------------------------------------------------|---------------------------------------------------------------------------------------------------------------------------------------------------------------------------|
| Brescovit, Antonio<br>Scientifica Researcher in Arachnology<br>Instituto Butantan<br>Brazil                                                       | Bretagnolle, François<br>Professor in Ecology<br>University of Burgundy and Franche-Comté<br>France                                                                  | Bretzler, Anja<br>Eawag: Swiss Federal Institute of Aquatic Science and<br>Technology<br>Switzerland                                                                      |
| BREUIL, Michel<br>Professor<br>Ministry of National Education<br>France                                                                           | Breure, Abraham<br>Research Associate<br>Naturalis Biodiversity Centre<br>Netherlands (the)                                                                          | Breure, Timo<br>PhD student - Soil Science<br>Rothamsted Research<br>United Kingdom of Great Britain and Northern Ireland<br>(the)                                        |
| Brewer, David<br>Veterinarian<br>United Kingdom of Great Britain and Northern Ireland<br>(the)                                                    | Brewer, Simon<br>Assistant Professor<br>University of Utah<br>United States of America (the)                                                                         | Briand, Frederic<br>Professor<br>Mediterranean Science Commission - CIESM<br>France                                                                                       |
| Brice, Justin<br>GIS Analyst/Wildlife Biology<br>Conservation Biology Institute<br>United States of America (the)                                 | Brice, Marie-Helene<br>PhD student<br>University of Montreal<br>Canada                                                                                               | Brides, Kane<br>Conservation Science Dept, Wildfowl & Wetlands Trust,<br>Slimbridge, Gloucestershire, UK<br>United Kingdom of Great Britain and Northern Ireland<br>(the) |
| Bridle, Kerry<br>Research Associate<br>University of Tasmania<br>Australia                                                                        | Bried, Joël<br>France                                                                                                                                                | Brielmann, Heike<br>Groundwater expert<br>Environment Agency Austria<br>Austria                                                                                           |
| Brienen, Roel<br>assistant Professor<br>University of Leeds, School of Geography<br>United Kingdom of Great Britain and Northern Ireland<br>(the) | Brieva, Rosario<br>chemistry<br>Universidad de Oviedo<br>Spain                                                                                                       | Briggs, Allan<br>Ornithology<br>BirdLife Australia<br>Australia                                                                                                           |
| Bright, Ethan<br>Researcher, Aquatic Ecology and Entomology<br>United States of America (the)                                                     | Brightman, Marc<br>Lecturer in Social and Environmental Sustainability<br>University College London<br>United Kingdom of Great Britain and Northern Ireland<br>(the) | Brightsmith, Donald<br>Associate Professor of Ecosystem Health<br>Texas A&M University<br>United States of America (the)                                                  |
| Brignall, Andrew<br>Conservation Genetics<br>Manchester Metropolitan University<br>United Kingdom of Great Britain and Northern Ireland<br>(the)  | Brilhante, Vitor<br>Brazil                                                                                                                                           | Brillard, Julien<br>Researcher<br>INRA<br>France                                                                                                                          |
| Brilli, Ylenia<br>Economics<br>University of Gothenburg<br>Sweden                                                                                 | Brinchmann, Jarle<br>Associate Professor<br>Leiden University<br>Netherlands (the)                                                                                   | Bringas, Olivia *<br>Maestra en Desarrollo Cultural<br>Tierra y Turismo/Independiente<br>Mexico                                                                           |

|                                                                                                                                                |                                                                                                                                                  |                                                                                                                                          |
|------------------------------------------------------------------------------------------------------------------------------------------------|--------------------------------------------------------------------------------------------------------------------------------------------------|------------------------------------------------------------------------------------------------------------------------------------------|
| Brinkhoff, Rose<br>Ecology<br>University of Tasmania<br>Australia                                                                              | Briones, Maria J.I.<br>University Professor/Soil ecologist<br>University of Vigo<br>Spain                                                        | Briones-Fourzán, Patricia<br>Senior Researcher<br>Universidad Nacional Autónoma de México<br>Mexico                                      |
| Briseño-Avena, Christian<br>Postdoctoral Scholar<br>Oregon State University - Hatfield Marine Science Center<br>United States of America (the) | Brisola Constantino, Pedro<br>MSc. student<br>USP<br>Brazil                                                                                      | Brisolla Ravanello, Bruno<br>pHD student<br>Leibniz-Institut für Pflanzenbiochemie<br>Germany                                            |
| Bristow, Keith<br>Senior Principal Research Scientist; Soil Physics &<br>Hydrology<br>CSIRO<br>Australia                                       | Britez, Ricardo<br>Ecologist<br>Independent Consulting<br>Brazil                                                                                 | Brito, Guilherme<br>Post-doctoral fellow / Ornithology<br>Departamento de Vertebrados, Museu Nacional, UFRJ<br>Brazil                    |
| Brito, Jose<br>PI of research group<br>University of Porto<br>Portugal                                                                         | Brito, Jose Carlos<br>Principal Investigator / Biological Sciences<br>CIBIO/InBIO, University of Porto<br>Portugal                               | Brito, Marcelo<br>Professor of Ecology and Conservation<br>Universidade Federal de Sergipe<br>Brazil                                     |
| Brito, Milena Bastos<br>Adjunct Professor<br>Bahiana Schhol of Medicine and Public Health<br>Brazil                                            | Brito, Vinícius<br>Professor<br>Universidade Federal de Uberlândia<br>Brazil                                                                     | Brito Morales, Isaac<br>PhD candidate<br>University of Queensland & CSIRO<br>Australia                                                   |
| Brito Vera, Gabriel A.<br>Dr. Sc. Student - Ecology<br>Pontificia Universidad Católica de Chile<br>Chile                                       | Brito-Castillo, Luis<br>Dr. of Science<br>Centro de Investigaciones Biologicas del Noroeste SC<br>Mexico                                         | Britson, Carol<br>zoology<br>University of Mississippi<br>United States of America (the)                                                 |
| Britto, Marcelo<br>Professor Associado<br>Universidade Federal do Rio de Janeiro/Museu Nacional<br>Brazil                                      | Britton, Sebastien<br>Senior Research Fellow focused on Human DNA repair<br>CNRS - IPBS - Toulouse<br>France                                     | Briz, Victor<br>Postdoctoral fellow<br>Centro de Biología Molecular Severo Ochoa (UAM-CSIC)<br>Spain                                     |
| Broadbent, Eben<br>Assistant Professor<br>University of Florida<br>United States of America (the)                                              | Brochet, Anne-laure<br>Research officer<br>LPO/BirdLife Partner<br>France                                                                        | Brochoire, Charlene<br>France                                                                                                            |
| Brock, James<br>Plant ecologist<br>University of Auckland<br>New Zealand                                                                       | Brock, Matthias<br>Assistant Professor Microbiology<br>University of Nottingham<br>United Kingdom of Great Britain and Northern Ireland<br>(the) | Brockway, Ben<br>Consultant and Senior Lecturer in Respiratory Medicine<br>University of Otago Duneind School of Medicine<br>New Zealand |

|                                                                                                                                                                                             |                                                                                                                                        |                                                                                                                                                         |
|---------------------------------------------------------------------------------------------------------------------------------------------------------------------------------------------|----------------------------------------------------------------------------------------------------------------------------------------|---------------------------------------------------------------------------------------------------------------------------------------------------------|
| Broddle, Petra<br>South Africa                                                                                                                                                              | Broderick, Emily<br>Biology Instructor and Marine Scientist<br>Lassen College<br>United States of America (the)                        | Brodeur, Julie C.<br>Ecotoxicologist<br>Consejo Nacional de Investigaciones Cientificas.<br>Argentina                                                   |
| Brodie, Gilianne<br>Associate Professor in Biology<br>University of the South Pacific<br>Fiji                                                                                               | Brodie, Jon<br>Professorial Research Fellow<br>COE Coral Reef Studies, James Cook University<br>Australia                              | Brodribb, Timothy<br>Biological Science<br>University of Tasmania<br>Australia                                                                          |
| Brodsky, Mery<br>Cytogenetics<br>Meir Hospital Kfar Saba<br>Israel                                                                                                                          | Bromberg, Elke<br>Brazil                                                                                                               | Brooker, Stuart<br>PhD student Ecology<br>Durham University<br>United Kingdom of Great Britain and Northern Ireland (the)                               |
| Brookes, Lola<br>Research Assistant<br>IoZ<br>United Kingdom of Great Britain and Northern Ireland (the)                                                                                    | Brooks, Jacob<br>Physics<br>Stony Brook University<br>United States of America (the)                                                   | Brooks, Kevin<br>Associate Professor of Psychology<br>Macquarie University<br>Australia                                                                 |
| Brooks, Lauren<br>Postdoctoral Scholar, Microbiology<br>University of California, Merced<br>United States of America (the)                                                                  | Brooks, Meriel<br>Professor of Biology<br>Green Mountain College<br>United States of America (the)                                     | Brooks, Robert P<br>Professor of Geography and Ecology<br>Pennsylvania State University<br>United States of America (the)                               |
| Brosi, Berry<br>Associate Professor of Environmental Sciences<br>Emory University<br>United States of America (the)                                                                         | Brosse, Sebastien<br>University Professor - Ecology<br>Laboratoire Evolution et Diversite Biologique, University of Toulouse<br>France | Brossmannova, Adriana<br>MSc Environmental Policy and Management<br>University of Bristol<br>United Kingdom of Great Britain and Northern Ireland (the) |
| Brothers, Denis<br>Professor Emeritus Entomology<br>University of KwaZulu-Natal<br>South Africa                                                                                             | Brotons, Lluís<br>Researcher<br>InForest JRU (CSIC-CTFC-CREAF)<br>Spain                                                                | Brouat, Carine<br>Evolutionary ecology<br>IRD<br>France                                                                                                 |
| Brough, Sarah<br>Associate Professor Astrophysics<br>University of New South Wales<br>Australia                                                                                             | BROUQUISSE, Renaud<br>Research Director<br>Institut National de la Recherche Agronomique<br>France                                     | Broussard, Michaelyn<br>Instructor<br>SELU<br>United States of America (the)                                                                            |
| Brousseau, Louise<br>Dr, PhD in Plant and Forest Biology with expertise in Ecological Genomics of wild populations of non-model species<br>Institute for Research and Development<br>France | Brouwer, Emiel<br>Ecologist<br>B-WARE research centre<br>Netherlands (the)                                                             | Brouwer, Judith<br>MSc ecology and evolution<br>Rijksuniversiteit Groningen<br>Netherlands (the)                                                        |

|                                                                                                                                                                                                       |                                                                                                                                |                                                                                                                               |
|-------------------------------------------------------------------------------------------------------------------------------------------------------------------------------------------------------|--------------------------------------------------------------------------------------------------------------------------------|-------------------------------------------------------------------------------------------------------------------------------|
| Brown, Alexis<br>Microbiology Lab Analyst<br>United States of America (the)                                                                                                                           | Brown, Annie<br>PhD Student/ Archaeology<br>University of Manitoba<br>Canada                                                   | Brown, Christian<br>PhD Candidate<br>University of South Florida<br>United States of America (the)                            |
| Brown, Christopher<br>Chief Executive Officer (CEO) / Environmental Scientist<br>and Manager<br>Namibian Chamber of Environment (with a membership<br>of 55 Namibian environmental NGOs)<br>Namibia   | Brown, Christopher<br>Associate Professor of Biology<br>Tennessee Tech University<br>United States of America (the)            | Brown, Federico<br>Professor Doutor (Assistant Professor)<br>Universidade de São Paulo<br>Brazil                              |
| Brown, Gregory<br>Head of Oceanography Department (retired)<br>Gardline Environmental Ltd (Global Marine Sciences<br>Survey Company)<br>United Kingdom of Great Britain and Northern Ireland<br>(the) | Brown, Grover<br>Ph.D. Student in Evolutionary Biology<br>University of Southern Mississippi<br>United States of America (the) | Brown, Irene<br>Population Biology<br>Retired<br>United States of America (the)                                               |
| Brown, James *<br>Bangor University<br>United Kingdom of Great Britain and Northern Ireland<br>(the)                                                                                                  | Brown, James H.<br>Distinguished Professor of Biology Emeritus<br>University of New Mexico<br>United States of America (the)   | Brown, Katrina<br>Social Scientist<br>James Hutton Institute<br>United Kingdom of Great Britain and Northern Ireland<br>(the) |
| Brown, Kerry<br>Veterinarian<br>Australia                                                                                                                                                             | Brown, Leone<br>Ecologist<br>United States of America (the)                                                                    | Brown, Leslie Dean<br>BSc (Materials Science) PhD (Materials Science)<br>University of Technology, Sydney.<br>Australia       |
| Brown, Norah<br>PhD candidate<br>University of British Columbia<br>Canada                                                                                                                             | Brown, Pamela<br>Linguistics<br>University at Buffalo<br>United States of America (the)                                        | Brown, Scott<br>Journalist<br>Udall Scholar<br>United States of America (the)                                                 |
| Brown, Shawn P.<br>Professor, Department of Biological Sciences<br>University of Memphis<br>United States of America (the)                                                                            | Brown, Zach<br>Soil Biogeochemistry<br>University of Tasmania<br>Australia                                                     | Brown, Zachary<br>Executive Director<br>Inian Islands Institute<br>United States of America (the)                             |
| Browne, Nicola<br>Marine Science lecturer and researcher<br>Curtin University<br>Australia                                                                                                            | Browning, George<br>Bishop: Inaugural Chair Anglican Communion<br>Environment Network<br>Chrales Sturt University<br>Australia | Browning, Ian<br>Environmental Educator<br>Camosun College<br>Canada                                                          |



|                                                                                                                                                                  |                                                                                                                                   |                                                                                                                                                            |
|------------------------------------------------------------------------------------------------------------------------------------------------------------------|-----------------------------------------------------------------------------------------------------------------------------------|------------------------------------------------------------------------------------------------------------------------------------------------------------|
| Brown-Peterson, Nancy<br>Research Scientist<br>The University of Southern Mississippi<br>United States of America (the)                                          | Brownrigg, Leon<br>Australia                                                                                                      | Brozovic, Robert<br>Graduate Student, MSc International Nature Conservation<br>Georg August University Göttingen<br>Germany                                |
| Brucet, Sandra<br>Research Professor<br>ICREA<br>Spain                                                                                                           | Bruchhaus, Iris<br>Parasitologist/Biologist<br>Bernhard Nocht Institute for Tropical Medicine,<br>Hamburg, Germany<br>Germany     | Brückner, Adrian<br>Researcher, chemical ecology and soil biology<br>Ecological Networks, Technische Universität Darmstadt<br>Germany                      |
| Brügger, Paula<br>Biologist, Environmental/Animal Abolitionist Education;<br>Conservation of Natural Resources<br>Federal University of Santa Catarina<br>Brazil | Brugioni, Elena<br>Professor<br>Universidade Estadual de Campinas UNICAMP<br>Brazil                                               | Brühl, Carsten<br>Senior researcher<br>Institute for Environmental Sciences, University Koblenz-<br>Landau<br>Germany                                      |
| Brumbaugh, Daniel<br>Associate Researcher, Institute of Marine Sciences<br>University of California, Santa Cruz<br>United States of America (the)                | Brumsack, Hans<br>Professor of Geochemistry<br>Institute for Chemistry and Biology of the Marine<br>Environment (ICBM)<br>Germany | Brun, Nadja<br>Post doc in ecotoxicology<br>Leiden University<br>Netherlands (the)                                                                         |
| Brunberg, Anna<br>Associate Professor, Limnology<br>Uppsala University<br>Sweden                                                                                 | Bruneel, Yaana<br>PhD student<br>KULeuven<br>Belgium                                                                              | Brunelli, Daniele<br>Prof. Petrology and petrography<br>Department of Chemical and Earth Sciences, Università di<br>Modena e Reggio Emilia, Italy<br>Italy |
| Brunelli, Erika<br>Biology Student<br>Federal São Paulo University<br>Brazil                                                                                     | Brunet, Lucas<br>PhD candidate<br>Irstea<br>France                                                                                | Brunio, Erwin<br>Philippines (the)                                                                                                                         |
| Brunk, Kristin<br>Wildlife Ecology<br>University of Wisconsin - Madison<br>United States of America (the)                                                        | Bruno, Daniel<br>Postdoc fellow, Ecology<br>IRSTEA<br>France                                                                      | Bruno, John<br>Professor<br>The University of North Carolina at Chapel Hill<br>United States of America (the)                                              |
| Bruno, Rosangela<br>student<br>UNIFESP Guarulhos<br>Brazil                                                                                                       | Brunskill, Gregg J.<br>Retired Chemical Oceanographer<br>Retired, Government of Australia<br>Australia                            | Brunton, Paul<br>Dean, Faculty of Dentistry<br>University of Otago<br>New Zealand                                                                          |
| Brusa, Jamie<br>Ecology<br>Montana State University<br>United States of America (the)                                                                            | Brusca, Richard *<br>Executive Director, Emeritus<br>Arizona-Sonora Desert Museum<br>United States of America (the)               | Brussard, Peter *<br>Professor Emeritus<br>University of Nevada, Reno<br>United States of America (the)                                                    |

|                                                                                                                                                                   |                                                                                                                                                    |                                                                                                                       |
|-------------------------------------------------------------------------------------------------------------------------------------------------------------------|----------------------------------------------------------------------------------------------------------------------------------------------------|-----------------------------------------------------------------------------------------------------------------------|
| Bruun, Hans Henrik<br>Professor of Ecology<br>University of Copenhagen<br>Denmark                                                                                 | Bruy, David<br>PhD student in botanic and vegetal ecology<br>University of Montpellier<br>New Caledonia                                            | Bruyndonckx, Nadia<br>scientific advisor<br>Save Our Seas Foundation<br>Switzerland                                   |
| Bruzos, Alicia L.<br>PhD student<br>Universidade de Vigo<br>Spain                                                                                                 | Bryan, Anthea<br>M. Sc. RPBio retired<br>ubc<br>Canada                                                                                             | Bryan, Brett<br>Professor of Global Change, Environment, and Society<br>Deakin University<br>Australia                |
| Bryan, Heather<br>Postdoctoral Fellow<br>University of Victoria<br>Canada                                                                                         | Bryan, James *<br>Ph.D. in Behavioural Ecology from UBC/ retired<br>Environmental Biologist with BC Ministry of Environment<br>Canada              | Bryant, Elaine<br>Microbiology<br>retired<br>United States of America (the)                                           |
| Bryant, John<br>Professor; Biosciences<br>University of Exeter<br>United Kingdom of Great Britain and Northern Ireland<br>(the)                                   | Bryant, Katherine<br>Postdoctoral Fellow<br>Radboud Universiteit<br>United States of America (the)                                                 | Bryce, Clay<br>Marine Biology<br>western Australian Museum<br>Australia                                               |
| Bucaram, Santiago<br>Assistant professor<br>USFQ<br>Ecuador                                                                                                       | Buchadas, Ana<br>Research Technician - Ecology<br>CIBIO/Inbio<br>Portugal                                                                          | Buchanan, Scott<br>PhD Candidate Conservation Ecology<br>University of Rhode Island<br>United States of America (the) |
| BUCHET, Rémi<br>Engineer in marine ecology<br>Ifremer<br>France                                                                                                   | Buchholz, Lech *<br>Entomologist, ecologist of forest<br>National Park<br>Poland                                                                   | Buchholz, Yvonne<br>PhD student<br>Free University Berlin<br>Germany                                                  |
| Buchwald, Robert<br>Instructor, Associate Director, Honors Residential<br>Academic Program<br>University of Colorado, Boulder<br>United States of America (the)   | Bucini, Gabriela<br>post-doctoral fellow in human ecology<br>Plant and Soil Science dept., Univeristy of Vermont<br>United States of America (the) | Buck, Alexander<br>Marine Biologist<br>James Cook University - Townsville<br>Australia                                |
| Buck, Bela H.<br>Professor for Applied Marine Biology & Aquaculture<br>Alfred Wegener Institute Helmholtz Centre for Polar and<br>Marin Research (AWI)<br>Germany | Buck, Brenda J<br>Professor of Medical Geology<br>University of Nevada Las Vegas<br>United States of America (the)                                 | Buck, Julia<br>Postdoc, Ecological Parasitology Lab<br>UC Santa Barbara<br>United States of America (the)             |

|                                                                                                                         |                                                                                                                                                          |                                                                                                                                                   |
|-------------------------------------------------------------------------------------------------------------------------|----------------------------------------------------------------------------------------------------------------------------------------------------------|---------------------------------------------------------------------------------------------------------------------------------------------------|
| Buck, Louise<br>Faculty member, Department of Natural Resources<br>Cornell University<br>United States of America (the) | Buckeridge, John<br>Professor<br>RMIT<br>Australia                                                                                                       | Buckeridge, Kate<br>Research Associate, Ecosystem Ecologist<br>Lancaster University<br>United Kingdom of Great Britain and Northern Ireland (the) |
| Bucki, Michael<br>Climate Change and Environment Counsellor<br>European Union<br>Indonesia                              | Buckingham, David<br>Senior Conservation Scientist<br>RSPB Centre for Conservation Science<br>United Kingdom of Great Britain and Northern Ireland (the) | Buckland, Jeffrey<br>Veterinarian<br>Australia                                                                                                    |
| Buckland, Paul<br>Palaeoecologist<br>United Kingdom of Great Britain and Northern Ireland (the)                         | Buckland, Philip<br>Senior lecturer in Environmental Archaeology<br>Umeå University<br>Sweden                                                            | Buckley, Benjamin J.W<br>PhD / Scientific Advisor<br>Borneo Nature Foundation<br>Indonesia                                                        |
| Buckley, David<br>Research Associate<br>Museo nacional de Ciencias Naturales MNCN-CSIC<br>Spain                         | Buckley, James<br>Postdoctoral researcher<br>ETH Zürich<br>Switzerland                                                                                   | Buckley, John<br>General Medical Practitioner<br>Australia                                                                                        |
| Buckley, Ralf<br>International Chair in Ecotourism Research<br>Griffith University<br>Australia                         | Buckup, Paulo Andreas<br>Professor Asociado<br>Universidade Federal do Rio de Janeiro, Museu Nacional<br>Brazil                                          | Budde, Katharina Birgit<br>Postdoc<br>INRA - Institut national de la recherche agronomique<br>France                                              |
| Budden, Andrew<br>Species Conservation Researcher<br>United Kingdom of Great Britain and Northern Ireland (the)         | Buddenbaum, Henning<br>Postdoc Researcher<br>Trier University<br>Germany                                                                                 | Budischak, Sarah<br>Department of Ecology and Evolutionary Biology<br>Princeton University<br>United States of America (the)                      |
| Budke, Jean Carlos<br>Head of Ecology and Sistematics Lab.<br>URI Erechim<br>Brazil                                     | Budke, Jessica<br>Assistant Professor - Ecology and Evolutionary Biology<br>University of Tennessee - Knoxville<br>United States of America (the)        | Budria, Alexandre<br>Aquatic ecology<br>French Agency for Biodiversity<br>France                                                                  |
| Buehler, Deborah<br>Ecology/Data Analyst<br>University of Toronto<br>Canada                                             | Buenavista, Dave<br>Field Biologist/Lecturer<br>Central Mindanao University<br>Philippines (the)                                                         | Bueno, David<br>Lecturer in Genetics<br>University of Barcelona<br>Spain                                                                          |
| Bueno, Rafael<br>Phd Student<br>State University of São Paulo<br>Brazil                                                 | Bueno de Mesquita, Clifton<br>PhD Candidate<br>University of Colorado<br>United States of America (the)                                                  | Bueno-Larraz, Beatriz<br>PhD Mathematics<br>Universidad Autónoma de Madrid<br>Spain                                                               |

|                                                                                                                            |                                                                                                                                                                                                            |                                                                                                                                                                                                                                     |
|----------------------------------------------------------------------------------------------------------------------------|------------------------------------------------------------------------------------------------------------------------------------------------------------------------------------------------------------|-------------------------------------------------------------------------------------------------------------------------------------------------------------------------------------------------------------------------------------|
| Buer, Anna-Lucia<br>Junior Scientist<br>Leibniz Institute for Baltic Sea Research Warnemuende<br>Germany                   | Buesching, Christina<br>Poleberry Foundation Research Fellow<br>Wildlife Conservation Research Unit, Dept. of Zoology,<br>Univ. of Oxford<br>United Kingdom of Great Britain and Northern Ireland<br>(the) | Buffan-Dubau, Evelyne<br>Associate professor<br>Toulouse-3 University<br>France                                                                                                                                                     |
| Bugajski, Aleksandra<br>Wildlife Biologist<br>Canada                                                                       | Buhk, Constanze<br>Senior Scientist<br>University Koblenz Landau<br>Germany                                                                                                                                | Buia, Maria-Cristina<br>Senior Resercher<br>Stazione Zoologia Anton Dohrn di Napoli<br>Italy                                                                                                                                        |
| Buitenwerf, Robert<br>Postdoc<br>Aarhus University<br>Denmark                                                              | Buitrago, Leonardo<br>Research/Biology-Biodiversity Informatics<br>Instituto Alexander von Humboldt<br>Colombia                                                                                            | Buitrago Aristizabal, Maria Alejandra<br>Botanist<br>Universidade Federal do Oeste do Pará<br>Brazil                                                                                                                                |
| Buitrago Reina, Margarita<br>Geologist PhD<br>Colciencias - Colombia. University of Salamanca - Spain<br>Colombia          | Buitron-Jurado, Galo<br>Ph. D. Student<br>Instituto Venezolano de Investigaciones Cientificas<br>Venezuela (Bolivarian Republic of)                                                                        | Bulgarella, Mariana<br>Research Fellow<br>Victoria University of Wellington<br>New Zealand                                                                                                                                          |
| Bulgarelli, Barbara<br>Senior Scientist, Ocean Color Remote Sensing<br>Joint Research Centre, European Commission<br>Italy | Bulkan, Janette<br>Assistant Professor<br>University of British Columbia<br>Canada                                                                                                                         | Bulla, Martin<br>Post Doc, behavioural ecologists + ornithologist<br>NIOZ, Royal Netherlands Institute for Sea Research, Max<br>Planck Institute for Ornithology, Seewiesen; Czech<br>University of Life Sciences Prague<br>Germany |
| Buma, Brian<br>Ecology<br>University of Alaska<br>United States of America (the)                                           | Bunbury, Nancy<br>Director of Research and Conservation<br>Seychelles Islands Foundation<br>Seychelles                                                                                                     | Bünger, Mariana<br>Professor<br>Universidade Federal do Ceará<br>Brazil                                                                                                                                                             |
| Bunnell, Fred *<br>Professor Emertus<br>University of British Columbia<br>Canada                                           | Bunney, Katherine<br>PhD Ecology Student<br>University of Pretoria<br>South Africa                                                                                                                         | Bunyard, Peter<br>Rainforest and climate<br>Institute of Environmental Studies and Services,<br>Universidad Sergio Arboleda<br>Colombia                                                                                             |
| Buoro, Mathieu<br>Research scientist<br>INRA<br>France                                                                     | Burant, Joseph<br>PhD Student<br>University of Guelph<br>Canada                                                                                                                                            | Burban, Christian<br>Entomologist<br>INRA<br>France                                                                                                                                                                                 |

|                                                                                                                                                    |                                                                                                                                         |                                                                                                                                                  |
|----------------------------------------------------------------------------------------------------------------------------------------------------|-----------------------------------------------------------------------------------------------------------------------------------------|--------------------------------------------------------------------------------------------------------------------------------------------------|
| Burbano Girón, Jaime<br>PhD Student/Conservation Planning<br>Pontificia Universidad Javeriana<br>Colombia                                          | Burch, Hayden<br>Medical Student<br>University Of Melbourne<br>Australia                                                                | Burchsted, JCA<br>Professor of Biology<br>Salem State University<br>United States of America (the)                                               |
| Burdett, Ayesha<br>Director of Collections and Research<br>New Mexico Museum of Natural History and Science<br>United States of America (the)      | Burfeid, Andrea<br>PhD student in ecosystem function and biodiversity<br>University of Barcelona<br>Spain                               | Burfield, Ian<br>Global Science Coordinator (Programmes)<br>BirdLife International<br>United Kingdom of Great Britain and Northern Ireland (the) |
| Burg Mayer, Guilherme<br>MsC Student<br>Federal University of Santa Catarina<br>Brazil                                                             | Burgar, Joanna<br>Postdoctoral Researcher<br>University of British Columbia<br>Canada                                                   | Burgas, Daniel<br>Postdoctoral Researcher<br>University of Jyväskylä<br>Finland                                                                  |
| Burger, Joseph R.<br>Human ecology<br>University of North Carolina at Chapel Hill<br>United States of America (the)                                | Burger, Pamela<br>Senior Reseracher / Population Genetics and Conservation<br>Vetmeduni Vienna<br>Austria                               | Burgess, Elizabeth<br>Associate Scientist<br>New England Aquarium<br>United States of America (the)                                              |
| Burghardt, Gordon<br>Alumni Dist. Service Prof., Psych and Ecol & Evol. Biology<br>University of Tennessee<br>United States of America (the)       | Burghardt, Karin<br>Smithson Fellow, Ecologist<br>Smithsonian Environmental Research Center<br>United States of America (the)           | Burgio, Kevin<br>Postdoctoral Fellow<br>University of Connecticut<br>United States of America (the)                                              |
| Burgo Braga, Ricardo<br>Lecturer/ Geography<br>Instituto do Meio Ambiente, Pontifícia Universidade Católica do Rio Grande do Sul (PUCRS)<br>Brazil | Burgos - Morán, Ricardo Ernesto<br>Docente - Investigador<br>Universidad Estatal Amazónica<br>Ecuador                                   | Burgues Martinez, Itziar<br>Ecology Masters Student<br>Azti Technalia<br>Spain                                                                   |
| Burgunder, Jade<br>PhD Student<br>Masaryk University<br>Czech Republic (the)                                                                       | Burin, Gustavo<br>PhD Student<br>Universidade de São Paulo<br>Brazil                                                                    | Burke, Melanie<br>MSc Candidate of Conservation Genetics<br>University of KwaZulu-Natal<br>South Africa                                          |
| Burkepile, Deron<br>Associate Professor<br>University of California Santa Barbara<br>United States of America (the)                                | Burley, David<br>Professor, Archaeology<br>Simon Fraser University<br>Canada                                                            | Burmeister, Kristin<br>PhD candidate<br>GEOMAR<br>Germany                                                                                        |
| Burna, Lauren<br>Fishery Biologist<br>United States of America (the)                                                                               | Burneo, Santiago<br>Director of Biological Sciences Dpt. / Curator of Mammals<br>Pontificia Universidad Católica del Ecuador<br>Ecuador | burnett, keith<br>Ornithologist<br>University of Hawaii at Hilo<br>United States of America (the)                                                |

|                                                                                                                                                  |                                                                                                                                          |                                                                                                                                                                       |
|--------------------------------------------------------------------------------------------------------------------------------------------------|------------------------------------------------------------------------------------------------------------------------------------------|-----------------------------------------------------------------------------------------------------------------------------------------------------------------------|
| Burnham, Robyn<br>Associate Professor of Ecology and Evolutionary Biology<br>University of Michigan<br>United States of America (the)            | Burnham, Robyn J.<br>Associate Professor of Ecology and Evolutionary Biology<br>University of Michigan<br>United States of America (the) | Burns, Bruce<br>Senior Lecturer in Plant Ecology<br>University of Auckland<br>New Zealand                                                                             |
| Burns, Georgette<br>Head of Social and Environment Discipline, Griffith School<br>of Environment<br>Griffith University<br>Australia             | Burns, Sean<br>Research Scientist<br>NCAR/Univ of Colorado<br>United States of America (the)                                             | Burr, Eric *<br>Cross-country ski instructor and retired park forester<br>Methow Conservancy<br>United States of America (the)                                        |
| Burri, Reto<br>Biologist<br>Germany                                                                                                              | Burridge, Alice K.<br>PostDoc in Marine Biology<br>University of Amsterdam<br>Netherlands (the)                                          | Burrow, Angela<br>Graduate Student/Wildlife Ecology<br>University of Georgia<br>United States of America (the)                                                        |
| Burrowes, Patricia A.<br>Professor of Biology<br>University of Puerto Rico -RP<br>Puerto Rico                                                    | Burslem, David<br>Professor of Ecology<br>University of Aberdeen<br>United Kingdom of Great Britain and Northern Ireland<br>(the)        | Burton, Cole<br>Assistant Professor, Wildlife Conservation<br>University of British Columbia<br>Canada                                                                |
| Burton, Frederic<br>Conservation Biologist<br>Cayman Islands (the)                                                                               | Burvingt, Olivier<br>Coastal Scientist<br>Plymouth University<br>United Kingdom of Great Britain and Northern Ireland<br>(the)           | Bury, R Bruce<br>Editor-in-Chief, Herpetological Conservation and Biology<br>Retired. PhD, Univ. California at Berkeley.<br>United States of America (the)            |
| Busack, Stephen D.<br>Emeritus Director, Research and Collections<br>North Carolina Museum of Natural Sciences<br>United States of America (the) | BUSANA, MICHELA<br>PhD Candidate biology<br>Netherlands (the)                                                                            | Buscher, Elena<br>MSc Student Ethnoecology<br>University of Victoria<br>Canada                                                                                        |
| Büscher, Thies<br>PhD, Functional Morphology, Zoology<br>Kiel University<br>Germany                                                              | Bush, Mark<br>Professor<br>Florida Institute of Technology<br>United States of America (the)                                             | Bushell, Mark<br>Curator of Invertebrates<br>Bristol, Clifton and West of England Zoological Society<br>United Kingdom of Great Britain and Northern Ireland<br>(the) |
| Bussi, Claudio<br>PhD student<br>CIBICI-CONICET<br>Argentina                                                                                     | Bussmann, Ingeborg<br>Senior Scientist<br>Alred Wegener Institute for Polar- and Marine Research<br>Germany                              | Bustamante, Enriquena<br>Academic_Population ecology and plant-animal<br>interactions<br>UNAM<br>Mexico                                                               |

|                                                                                                                                                     |                                                                                                                                                                              |                                                                                                                                                    |
|-----------------------------------------------------------------------------------------------------------------------------------------------------|------------------------------------------------------------------------------------------------------------------------------------------------------------------------------|----------------------------------------------------------------------------------------------------------------------------------------------------|
| Bustamante, Javier *<br>Scientific Researcher<br>Estación Biológica de Doñana (CSIC)<br>Spain                                                       | Bustamante, Karen<br>Landscape Ecology<br>Mexico                                                                                                                             | Bustamante, Mercedes<br>Ecology<br>University of Brasilia<br>Brazil                                                                                |
| Bustamante, Paco<br>Professor, Ecotoxicology<br>University of La Rochelle<br>France                                                                 | Bustamante Guzmán, Nathalia Carolina<br>Primateology<br>Fundacion Proyecto Primates<br>Colombia                                                                              | Butenas Lopez, Lucas<br>Geography<br>universidade de São Paulo<br>Brazil                                                                           |
| BUTET, Alain<br>senior Scientist<br>CNRS<br>France                                                                                                  | Butler, Colin<br>Adjunct Professor<br>University of Canberra<br>Australia                                                                                                    | Butler, Helen<br>Research and Impact Programme Management<br>University of Exeter<br>United Kingdom of Great Britain and Northern Ireland<br>(the) |
| Butler, Joseph<br>Professor of Biology<br>University of North Florida<br>United States of America (the)                                             | Butler, Paul<br>Analytical chemist (environmental)<br>New Zealand                                                                                                            | Butler, Phillip<br>Dr, Materials science and engineering<br>Oxford Photovoltaics<br>United Kingdom of Great Britain and Northern Ireland<br>(the)  |
| Butler, Robert<br>Conservation Biologist, fishes and freshwater mollusks<br>U.S. Fish & Wildlife Service, retired<br>United States of America (the) | Butler, Steven<br>Research Biologist - Fisheries<br>Illinois Natural History Survey, Prairie Research Institute,<br>University of Illinois<br>United States of America (the) | Butlin, Roger<br>Professor of Evolutionary Biology<br>The University of Sheffield<br>United Kingdom of Great Britain and Northern Ireland<br>(the) |
| Butt, Nathalie<br>Australian Research Fellow, School of Biological Sciences<br>The University of Queensland<br>Australia                            | Butts, Christine<br>Scientist<br>Plant & Food Research<br>New Zealand                                                                                                        | Buyens, Isabelle<br>Masters student of plant ecology<br>University of Pretoria<br>South Africa                                                     |
| Buyse, Pauline<br>Research Engineer<br>France                                                                                                       | Buzatto, Bruno<br>Evolutionary Biology<br>University of Western Australia<br>Australia                                                                                       | Byakagaba, Patrick<br>Ecologist<br>Makerere University<br>Uganda                                                                                   |
| Bydlowski, Sergio<br>Associate Professor of Hematology<br>University of São Paulo School of Medicine<br>Brazil                                      | Byer, Nathan<br>PhD Candidate - Wildlife Ecology<br>University of Wisconsin - Madison<br>United States of America (the)                                                      | Byers, Onnie<br>Chair<br>Global Conservation Network/Conservation Planning<br>Specialist Group<br>United States of America (the)                   |
| Byholm, Patrik<br>Head of Programme, Senior scientist<br>Novia University of Applied Science<br>Finland                                             | Bynum, Jonathan<br>Student of Herpetology<br>Southeastern Louisiana University<br>United States of America (the)                                                             | Byrareddy, Siddappa<br>Associate Professor<br>University of Nebraska Medical Center<br>United States of America (the)                              |

|                                                                                                                                                                          |                                                                                                                                 |                                                                                                                              |
|--------------------------------------------------------------------------------------------------------------------------------------------------------------------------|---------------------------------------------------------------------------------------------------------------------------------|------------------------------------------------------------------------------------------------------------------------------|
| Byrne, Jason<br>Associate Professor, Urban & Environmental Planning<br>Griffith University<br>Australia                                                                  | Byström, Pär<br>Associate professor in Ecology<br>Department of Ecology and Environmental Science,<br>Umeå university<br>Sweden | Bytebier, Benny<br>Curator of the Bews Herbarium (NU)<br>University of KwaZulu-Natal<br>South Africa                         |
| Bythell, John<br>Professor of Coral Reef Biology<br>Newcastle University UK<br>United Kingdom of Great Britain and Northern Ireland<br>(the)                             | C RAJAN, SAJEEV<br>PhD Scholar<br>Indian Institute of Information Technology and<br>Management-Kerala (IIITM-K)<br>India        | C., Sudhakar Reddy<br>Scientist<br>National Remote Sensing Centre<br>India                                                   |
| C. Contreiras de Carvalho, Igenes A.<br>PhD student at Institute of Earth Surface Dynamics<br>(IDYST)<br>University of Lausanne<br>Switzerland                           | C. Junger, Pedro<br>Ecologist<br>Universidade Federal do Rio de Janeiro<br>Brazil                                               | Caballer Gutierrez, Manuel<br>Collections Assistant. PhD in Marine Biology<br>Muséum national d'Histoire naturelle<br>France |
| Caballes, Ciemon Frank<br>ARC Centre of Excellence for Coral Reef Studies - James<br>Cook University<br>Australia                                                        | Cabeceira, Fernando<br>PhD Student/ Ecology<br>Universidade Federal de Mato Grosso<br>Brazil                                    | Cabello, Javier<br>Professor/ Ecology<br>University of Almería<br>Spain                                                      |
| Cabeza, Mar<br>Associate Professor<br>University of Helsinki<br>Finland                                                                                                  | Cabezas-Cruz, Alejandro<br>Chargé de Recherche de 1ère classe<br>National Institute for Agricultural Research (INRA)<br>France  | CABIANCA, MARIA ANGELA *<br>Gestão Ambiental<br>Universidade Anhembi Morumbi<br>Brazil                                       |
| Cabral, Camila<br>PhD in Ecology<br>Universidade Federal do Rio Grande do Norte<br>Brazil                                                                                | Cabral, Hugo<br>Paraguay                                                                                                        | Cabral Rezende, Gabriela<br>Project Coordinator<br>IPÊ - Institute for Ecological Research<br>Brazil                         |
| Cabrales, patricia<br>Ph.D. student<br>UNAM<br>Mexico                                                                                                                    | Cabrera, Francisco<br>Professor. Soli Science<br>CSIC. Spain<br>Spain                                                           | cabrera, nelson *<br>Mechanical Engineer<br>Tcon Chile Ltda<br>Chile                                                         |
| Cabrera, Phronesis<br>Graduate student<br>Institute of Environmental Science and Meteorology,<br>University of the Philippines, Diliman Quezon City<br>Philippines (the) | Cabrera A, Francisco J<br>Associate profesor<br>Universidad San Francisco de Quito<br>Ecuador                                   | Cabrera Walsh, Guillermo *<br>Biologist<br>FUEDEI<br>Argentina                                                               |



|                                                                                                                                                              |                                                                                                                             |                                                                                                                                                   |
|--------------------------------------------------------------------------------------------------------------------------------------------------------------|-----------------------------------------------------------------------------------------------------------------------------|---------------------------------------------------------------------------------------------------------------------------------------------------|
| Cabrerizo, Marco J.<br>Postdoctoral Research Assistant<br>Department of Ecology, Faculty of Sciences, University of Granada, 18071, Granada (Spain)<br>Spain | Cacabelos, Eva<br>Researcher<br>University of Azores<br>Portugal                                                            | Cacace, Elisabetta<br>PhD Candidate<br>EMBL Heidelberg<br>Germany                                                                                 |
| Cacciali, Pier<br>Herpetologist<br>Instituto de Investigación Biológica del Paraguay<br>Paraguay                                                             | Caceres, Hernan<br>Conservation Scientist<br>The University of Queensland<br>Australia                                      | Cáceres Martínez, Carlos Herney<br>Biologist<br>Universidad de Pamplona<br>Colombia                                                               |
| Cadario, Daniele<br>Physics and nanotechnology engineering<br>DTU<br>Denmark                                                                                 | Caddell, Richard<br>Lecturer in Law<br>Cardiff University<br>United Kingdom of Great Britain and Northern Ireland (the)     | Caddick, Mark<br>Profesor<br>University of Liverpool<br>United Kingdom of Great Britain and Northern Ireland (the)                                |
| Cade, Thomas J.<br>Professor Emeritus of Zoology<br>Cornell University, Ithaca, NY and The Peregrine Fund, Inc.<br>United States of America (the)            | Cadena, Daniel<br>Professor<br>Departamento de Ciencias Biologicas, Universidad de los Andes<br>Colombia                    | Cadez, Luca<br>Research fellow - GIS, landscape<br>University of Udine<br>Italy                                                                   |
| Cadiz, Bernardita<br>Post-PhD Neurcience<br>Pontificia Universidad Católica de Chile<br>Chile                                                                | Caduff, Lea<br>laboratory technician<br>Eawag<br>Switzerland                                                                | Cadwallader, Helen<br>PhD Candidate, Marine Biology<br>University of Waikato<br>New Zealand                                                       |
| Caetano Tymus, Julio Ricardo<br>Restoration Specialist<br>Sociedade Brasileira de Restauração Ecológica<br>Brazil                                            | Cafaro, Philip<br>Colorado State University<br>United States of America (the)                                               | Caffrey, Carolee<br>Instructor/Behavioral Ecology/ Crows<br>San Diego Miramar College<br>United States of America (the)                           |
| Cahill, Madelin<br>United States of America (the)                                                                                                            | Cahoon, Lawrence<br>Professor of Biology and Marine Biology<br>UNC Wilmington<br>United States of America (the)             | Cahuich, Miguel<br>Air pollution specialist<br>CINVESTAV<br>Mexico                                                                                |
| Cai, Giampiero<br>Associate Professor of Botany<br>University of Siena, Dept. Life Sciences<br>Italy                                                         | Cai, Yongjiu<br>Associate professor<br>Nanjing Institute of Geography and Limnology, Chinese Academy of Sciences<br>Finland | Caicedo, Ana<br>Associate Professor, Biology<br>University of Massachusetts<br>United States of America (the)                                     |
| Caicedo Concha, Diana Milena<br>Professor in Environmental Engineering<br>Universidad Cooperativa de Colombia<br>Colombia                                    | Caignard, Thomas<br>PhD Student<br>INRA-Biogeco, University of Bordeaux<br>France                                           | Cailliet, Gregor *<br>Professor Emeritus, Ichthyology & Marine Ecology<br>Moss Landing Marine Laboratories, CSU<br>United States of America (the) |

|                                                                                                                                                       |                                                                                                                                                             |                                                                                                                                           |
|-------------------------------------------------------------------------------------------------------------------------------------------------------|-------------------------------------------------------------------------------------------------------------------------------------------------------------|-------------------------------------------------------------------------------------------------------------------------------------------|
| Caine, Allison<br>PhD Candidate, Anthropology<br>University of Michigan<br>United States of America (the)                                             | Caine, Nel<br>Emeritus Professor of Geography<br>University of Colorado<br>United States of America (the)                                                   | Caires, Luanne<br>Plant Ecology<br>University of Sao Paulo<br>Brazil                                                                      |
| Cairns, Kylie<br>Moleculr Geneticist<br>UNSW<br>Australia                                                                                             | Cairns, Timothy<br>Senior Scientist, Molecular and Applied Microbiology<br>Technical University Berlin<br>Germany                                           | CAKIR, Serhat<br>Assoc. Prof. Dr.<br>Dept. of Physics Middle East Tefchnical University<br>Turkey                                         |
| CALAÇA MENEZES, TATIANE<br>DOCTORAL STUDENT/ECOLOGY<br>FEDERAL UNIVERSITY OF PERNAMBUCO<br>Brazil                                                     | Calatayud Ortega, Joaquín<br>Postdoctoral researcher in Ecology<br>Umea University<br>Sweden                                                                | Calazans, Savio *<br>Phd<br>Universidade Federal Fluminense - UFF<br>Brazil                                                               |
| Caldara, Otávio Augusto<br>Filósofo<br>Brazil                                                                                                         | CALDERAN, BEATRIZ<br>Agronomist Eng - PhD in Science<br>USP/ESALQ<br>Brazil                                                                                 | CALDERAN RODRIGUES BONASSI, MARIA BEATRIZ<br>PHD BIOTECNOLOGY<br>USP/ESALQ<br>Brazil                                                      |
| Calderon-Acevedo, Camilo<br>Ph.D. Candidate, Ecology, Evolution and Systematics<br>University of Missouri St. Louis<br>United States of America (the) | Calegari, Bárbara *<br>Biologist researcher<br>Pontifícia Universidade Católica do Rio Grande do Sul<br>Brazil                                              | Calhau, Julia<br>postdoctoral researcher<br>Universidade Federal do Espírito Santo<br>Brazil                                              |
| Calhoun, Dana<br>Research Faculty<br>University of Colorado Boulder<br>United States of America (the)                                                 | Calibeo, Diletta Luna<br>PhD Candidate in Environmental Science / Centre for<br>Governance and Public Policy<br>Griffith School of Environment<br>Australia | Caliman, Adriano<br>Associate Professor of Ecology<br>Federal University of Rio Grande do Norte<br>Brazil                                 |
| Calió, Maria Fernanda<br>Professor / Botany<br>Universidade Estadual de Campinas<br>Brazil                                                            | Cáliz, Joan<br>PhD Microbiology<br>Center for Advanced Studies of Blanes (CEAB-CSIC)<br>Spain                                                               | Calkins, Jennifer<br>Evolutionary Biology/Environmental Law<br>calkins<br>United States of America (the)                                  |
| Callens, Martijn<br>Post-doc in evolutionary biology<br>CNRS - CEFE<br>France                                                                         | Callesen, Ingeborg<br>Soil science and forest ecology<br>University of Copenhagen<br>Denmark                                                                | Callicott, J.Baird<br>University Distinguished Research Professor Emeritus<br>University of North Texas<br>United States of America (the) |
| Callieri, Cristiana<br>Senior researcher in limnology<br>National research council -<br>Italy                                                         | Callo-Concha, Daniel<br>Senior researcher<br>Center for Development Research (ZEF), University of<br>Bonn<br>Germany                                        | Calme, Sophie<br>Associate Professor, tropical ecology<br>Université de Sherbrooke<br>Canada                                              |

|                                                                                                                                                  |                                                                                                      |                                                                                                                                                            |
|--------------------------------------------------------------------------------------------------------------------------------------------------|------------------------------------------------------------------------------------------------------|------------------------------------------------------------------------------------------------------------------------------------------------------------|
| Calmus, Thierry<br>Researcher/Geologist<br>UNAM<br>Mexico                                                                                        | Calvente, Alice<br>Full professor in Botany<br>Universidade Federal do Rio Grande do Norte<br>Brazil | Calver, Michael<br>Animal Ecologist<br>Murdoch University<br>Australia                                                                                     |
| Calvete Sogo, Hector *<br>Researcher<br>CIEMAT<br>Spain                                                                                          | Calvinho, Karin<br>Chemist<br>Rutgers University<br>Brazil                                           | Calviño-Cancela, María<br>Associate Professor in Ecology<br>University of Vigo<br>Spain                                                                    |
| Calvo, Fernando<br>Team Leader - Cancer Biology<br>Institute of Cancer Research<br>United Kingdom of Great Britain and Northern Ireland<br>(the) | Calvo-Rodriguez, Sofia<br>PhD student<br>University of Alberta<br>Canada                             | Camac, James<br>Postdoctoral Research Fellow/ Ecology<br>The University of Melbourne<br>Australia                                                          |
| Camacho, Agustín<br>post doc/ ZOOLOGY<br>São Paulo University<br>Brazil                                                                          | Camacho, Antonio<br>Professor, Ecology<br>University of Valencia<br>Spain                            | Camacho, Carlos<br>Estación Biológica de Doñana, CSIC<br>Spain                                                                                             |
| Camacho, M. Alejandra<br>Researcher<br>Pontificia Universidad Católica del Ecuador<br>Ecuador                                                    | Camacho Garzón, Yudy Azucena<br>PhD Candidate<br>University of Alicante<br>Spain                     | Camacho-Cristóbal, Juan<br>Professor (Plant Physiology)<br>Universidad Pablo de Olavide<br>Spain                                                           |
| Camarano, Ana Amélia<br>Research and Lecturer/Economist and<br>IPEA<br>Brazil                                                                    | Camarda, Martina<br>Electronical Engineer<br>Italy                                                   | Camarero, Lluís<br>Scientist, Biogeochemistry<br>CSIC<br>Spain                                                                                             |
| Camargo, Anderson<br>Entomologia<br>Universidade do Estado de Mato Grosso<br>Brazil                                                              | Camargo, Arley<br>Professor<br>Universidad de la Republica<br>Uruguay                                | Camargo, Paulo<br>Physicist<br>UFSCAR<br>Brazil                                                                                                            |
| Camargo, Rodrigo<br>PhD Student<br>Unicamp<br>Brazil                                                                                             | Camarretta, Nicolo<br>PhD Student<br>University of Tasmania<br>Australia                             | Cambray, Guillaume<br>Researcher in synthetic biology<br>INRA<br>France                                                                                    |
| Camelier, Priscila<br>Pós-Doctoral<br>Museu de Zoologia da Universidade de São Paulo<br>Brazil                                                   | Camenzind, Tessa<br>Biologist<br>Freie Universität Berlin<br>Germany                                 | Camerlink, Irene<br>Postdoctoral researcher in Animal Science<br>Scotland's Rural College<br>United Kingdom of Great Britain and Northern Ireland<br>(the) |

|                                                                                                                                                          |                                                                                                                 |                                                                                                                                      |
|----------------------------------------------------------------------------------------------------------------------------------------------------------|-----------------------------------------------------------------------------------------------------------------|--------------------------------------------------------------------------------------------------------------------------------------|
| Cameron, David<br>Senior Botanist<br>Victorian Department of Environment, Land, Water & Planning<br>Australia                                            | Cameron, Elissa<br>Professor of Wildlife Biology<br>University of Tasmania<br>Australia                         | Cameselle, Alejandra L.<br>Postdoctoral Researcher in Marine Geosciences<br>Universidade de Vigo<br>Spain                            |
| CAMILLO DE Aguiar, Antônio José<br>Professor Zoology<br>Universidade de Brasília<br>Brazil                                                               | Camino-Serrano, Marta<br>CREAF<br>Spain                                                                         | cammarata, kirk<br>Associate Professor of Biology<br>TX A&M University-Corpus Christi<br>United States of America (the)              |
| Cammissa, Nickie<br>Doctoral Student in Environmental Science and Engineering<br>University of California- Los Angeles<br>United States of America (the) | Campana, Sara<br>PhD candidate<br>University of Amsterdam<br>Netherlands (the)                                  | Campanaro, Alessandro<br>Researcher / Forest ecosystem<br>Italy                                                                      |
| Campany, Courtney<br>Post doctoral fellow<br>Colgate University<br>United States of America (the)                                                        | Campbell, Alistair John<br>Postdoc Ecologist<br>Embrapa Amazonia Oriental<br>Brazil                             | Campbell, Claire<br>Scientist (Ecology)<br>United Kingdom of Great Britain and Northern Ireland (the)                                |
| Campbell, Dave<br>Graduate Student<br>Tulane University<br>United States of America (the)                                                                | Campbell, David<br>Systematic Malacology<br>United States of America (the)                                      | Campbell, Diane<br>Professor, Ecology and Evolutionary Biology<br>University of California, Irvine<br>United States of America (the) |
| Campbell, Dr Robert Bruce<br>Conservation Wildlife veterinary medicine (One Health)<br>National Zoological Gardens of South Africa<br>South Africa       | Campbell, Ian<br>Associate Professor, River Scientist<br>Rhithroecology Pty Ltd<br>Australia                    | Campbell, John<br>Terrestrial Ecologists<br>Oregon State University<br>United States of America (the)                                |
| Campbell, Jonathan<br>Professor of Biology<br>UT-Arlington<br>United States of America (the)                                                             | Campbell, Kiyoo<br>MSc. Student<br>University of Victoria<br>Canada                                             | Campbell, Marnie L<br>Professor and Director of the Environmental Research Institute<br>University of Waikato<br>New Zealand         |
| Campbell, Mason<br>Postdoctoral Research Fellow<br>James Cook University<br>Australia                                                                    | Campbell, Susan<br>Research Officer<br>Australia                                                                | Campbell, T Colin *<br>Professor Emeritus of Nutritional Biochemistry<br>Cornell University<br>United States of America (the)        |
| Campbell, William Bruce<br>Ecology, Environmental Impact Assessment<br>United States of America (the)                                                    | Campelo, Filipe<br>Post-Doctoral Researcher<br>Centre for Functional Ecology, University of Coimbra<br>Portugal | Campen, Hanna<br>M. Sc. Biological Oceanography<br>Kiel University<br>Germany                                                        |

|                                                                                                                                     |                                                                                                                                                                                                        |                                                                                                       |
|-------------------------------------------------------------------------------------------------------------------------------------|--------------------------------------------------------------------------------------------------------------------------------------------------------------------------------------------------------|-------------------------------------------------------------------------------------------------------|
| Camphuysen, Cornelis Jan<br>Marine ecologist, senior scientist<br>Royal Netherlands Institute for Sea Research<br>Netherlands (the) | Campioli, Matteo<br>University of Antwerp<br>Belgium                                                                                                                                                   | Campos, Edmo<br>Professor<br>Oceanographic Institute of the University of Sao Paulo<br>Brazil         |
| Campos, Felipe<br>PhD in Biodiversity<br>University of Barcelona<br>Spain                                                           | Campos, Luiz<br>Professor, Entomology<br>Universidade Federal do Rio Grande do Sul<br>Brazil                                                                                                           | Campos, Thomas<br>Titlau Professor<br>Federal University of Rio Grande do Norte<br>Brazil             |
| Campos Gaona, Jairo *<br>Professor<br>Universidade Federal da Grande Dourados<br>Brazil                                             | Campos-Arceiz, Ahimsa<br>Associate Professor<br>The University of Nottingham Malaysia Campus<br>Malaysia                                                                                               | Campos-Filho, Eduardo<br>Restoration Ecologist<br>ISA - Instituto Socioambiental<br>Brazil            |
| Campos-Rocha, Antonio<br>PhD student in Plant Biology<br>Unicamp<br>Brazil                                                          | Camprubí, Antoni<br>Researcher - Geology<br>Instituto de Geología, Universidad Nacional Autónoma de México<br>Mexico                                                                                   | Canal Vieira, Leticia<br>PhD Candidate<br>Griffith University<br>Australia                            |
| Canales Delgadillo, Julio Cesar<br>Researcher<br>ICML-UNAM<br>Mexico                                                                | Canales-Aguirre, Cristian B.<br>Associate professor / Evolutionary biology<br>Universidad de Los Lagos<br>Chile                                                                                        | Canali, Massimo<br>Agricultural Economist<br>University of Bologna<br>Italy                           |
| Canals, Àngels<br>Associate Professor / Geologist<br>Universitat de Barcelona<br>Spain                                              | Cancela da Fonseca, Luis<br>Retired Professor<br>MARE - Laboratório Marítimo da Guia and CTA,<br>Universidade do Algarve<br>Portugal                                                                   | Canedo, Clarissa<br>Professor of Zoology<br>UERJ - Universidade do Estado do Rio de Janeiro<br>Brazil |
| Cañedo-Argüelles, Miguel<br>Postdoc<br>University of Barcelona<br>Spain                                                             | Canessa, Rafaella<br>PhD Student / Plant Ecology<br>University of Marburg<br>Germany                                                                                                                   | Canestraro, Bianca<br>Biologist<br>Instituto de Botânica de São Paulo<br>Brazil                       |
| Canet, Carles<br>Researcher / Geology - mineral resources<br>Universidad Nacional Autónoma de México<br>Mexico                      | Cannatella, David<br>Professor<br>University of Texas at Austin<br>United States of America (the)                                                                                                      | Cannell, Sharri<br>Botany and Zoology<br>University of Johannesburg<br>South Africa                   |
| Cannon, Joseph<br>College Ecology Professor<br>City College of San Francisco<br>United States of America (the)                      | CANO, MARIA ISABEL NOGUEIRA CANO<br>ASSOCIATED PROFESSOR in Molecular Biology and Genetics<br>Genetics Dept., Biosciences Institute, Sao Paulo State University (UNESP), Botucatu, Sao Paulo<br>Brazil | Canovas, David<br>Associate Professor of Genetics<br>University of Seville<br>Spain                   |

|                                                                                                                                       |                                                                                                                                                                  |                                                                                                                                                                                       |
|---------------------------------------------------------------------------------------------------------------------------------------|------------------------------------------------------------------------------------------------------------------------------------------------------------------|---------------------------------------------------------------------------------------------------------------------------------------------------------------------------------------|
| Cant, Jeroen<br>Senior Researcher<br>Agfa HealthCare<br>Belgium                                                                       | Canteiro, Catia<br>United Kingdom of Great Britain and Northern Ireland<br>(the)                                                                                 | Cantera Kintz, Jaime Ricardo<br>Professor of Biology, ecology and marine Biology<br>Universidad del Valle Departamento de Biología<br>Colombia                                        |
| Cantidio, Luiza<br>Post Graduate Student<br>UFRN<br>Brazil                                                                            | Cantino, Marie<br>Emeritus faculty, Physiology<br>University of Connecticut<br>United States of America (the)                                                    | Cantino, Philip<br>Emeritus Professor of Environmental and Plant Biology<br>Ohio University<br>United States of America (the)                                                         |
| Cantoni, Roberto<br>Postdoc, STS<br>Sciences Po Paris<br>France                                                                       | Cantu, Antonio<br>Biologist<br>Ducks Unlimited de Mexico<br>Mexico                                                                                               | Canzler, Sebastian<br>Postdoc in Bioinformatics<br>University of Leipzig<br>Germany                                                                                                   |
| CAO, Xupeng<br>Associated Professor<br>Dalian Institute of Chemical Physics, Chinese Academy of<br>Sciences<br>China                  | Capel, Pierre<br>Associate Professor in nuclear physics<br>Université libre de Bruxelles (ULB)<br>Belgium                                                        | Capellini, Maria Eduarda<br>Mestranda em História<br>Universidade Estadual de Campinas<br>Brazil                                                                                      |
| Capelo, Jorge<br>Senior Researcher, Vegetation Science<br>The National Institute of Agrarian and Veterinarian<br>Research<br>Portugal | Capers, Robert<br>Plant ecologist<br>University of Connecticut<br>United States of America (the)                                                                 | Caperuto, Luciana<br>Professor<br>UNIFESP<br>Brazil                                                                                                                                   |
| Capet, Xavier<br>physical oceanographer<br>LOCEAN, CNRS<br>France                                                                     | Capewell, Simon<br>Chair of Clinical Epidemiology<br>University of Liverpool<br>United Kingdom of Great Britain and Northern Ireland<br>(the)                    | Capinha, César<br>Postdoctoral researcher<br>Global Health and Tropical Medicine, GHTM, Instituto de<br>Higiene e Medicina Tropical IHMT. Universidade Nova de<br>Lisboa.<br>Portugal |
| Capistrant-Fossa, Kyle<br>Marine Biology<br>United States of America (the)                                                            | Capitani, Claudia<br>Researcher in sustainable development<br>Italy                                                                                              | Capparella, Angelo<br>Associate Professor of Vertebrate Zoology<br>Illinois State University<br>United States of America (the)                                                        |
| Caputo, Michelle<br>Ecologist<br>Rhodes university<br>South Africa                                                                    | CaraDonna, Paul<br>Conservation Scientist and Assistant Professor; Ecology<br>Chicago Botanic Garden & Northwestern University<br>United States of America (the) | Caramaschi, Ulisses<br>Full Professor / Zoology<br>Museu Nacional / Universidade Federal do Rio de Janeiro<br>Brazil                                                                  |

|                                                                                                                                                             |                                                                                                               |                                                                                                                                                                          |
|-------------------------------------------------------------------------------------------------------------------------------------------------------------|---------------------------------------------------------------------------------------------------------------|--------------------------------------------------------------------------------------------------------------------------------------------------------------------------|
| Caramaschi, Ulisses<br>Full Professor/Vertebrate Zoology<br>Museu Nacional - Universidade Federal do Rio de Janeiro<br>Brazil                               | Carapezza, Attilio<br>Retired Professor<br>University of Palermo<br>Italy                                     | Caravaggi, Anthony<br>Postdoctoral researcher<br>University College Cork<br>Ireland                                                                                      |
| Carballo, Jose Luis<br>Senior Research, Instituto de Ciencias del Mar y<br>Limnologia, Benthic ecology<br>Universidad Nacional Autonoma de Mexico<br>Mexico | Carballo-Bolaños, Rodrigo<br>PhD candidate<br>TIGP-Biodiversity Program, Academia Sinica<br>Taiwan            | Carbno, Collin<br>Theoretical Physicist (P. Phys.)<br>(retired)<br>Canada                                                                                                |
| Carboni, Marta<br>Post Doc<br>CNRS, Laboratoire d'Ecologie Alpine<br>France                                                                                 | Carbutt, Clinton<br>Plant Scientist<br>Ezemvelo KZN Wildlife<br>South Africa                                  | Carciofi, Alex<br>Astronomy<br>Universidade de São Paulo<br>Brazil                                                                                                       |
| Cardellini, Giuseppe<br>PhD student<br>KU Leuven<br>Belgium                                                                                                 | Cardelus, Catherine<br>Association Professor, Ecology<br>Colgate University<br>United States of America (the) | Carden, Ruth<br>Adjunct Research Fellow<br>University College Dublin<br>Ireland                                                                                          |
| Cardenas, Leyla *<br>professor<br>Universidad AUSTRAL DE CHILE<br>Chile                                                                                     | Cárdenas, Anatoly *<br>Ecoturismo<br>UNAMAD<br>Peru                                                           | Cárdenas Mahecha, Liliana Paola<br>Biologist, Master student Ecology and Conservation<br>Universidad Nacional de Colombia, Universidade Federal<br>do Paraná<br>Colombia |
| Cardiel Sanz, José María<br>Profesor Titular<br>Universidad Autónoma de Madrid. Departamento de<br>Biología<br>Spain                                        | Cardilini, Adam<br>Ecology<br>Australia                                                                       | Cardinale, Bradley<br>Professor, and Director Cooperative Institute for Great<br>Lakes Research<br>University of Michigan<br>United States of America (the)              |
| cardini, andrea<br>researcher/biologist-morphometrician<br>university of modena & reggio emilia<br>Italy                                                    | Cardini, Ulisse<br>Research Scientist<br>Stazione Zoologica Anton Dohrn<br>Italy                              | Cardona Gutiérrez, María Fernanda<br>Student<br>Universidad del valle<br>Colombia                                                                                        |
| Cardoso, Anabelle<br>PhD Candidate<br>University of Oxford<br>United Kingdom of Great Britain and Northern Ireland<br>(the)                                 | Cardoso, Bruna *<br>Universitária de biologia<br>UNEMAT<br>Brazil                                             | Cardoso, Mariana<br>Biologist / Professor<br>Dom Bosco SEBSA<br>Brazil                                                                                                   |

|                                                                                                                           |                                                                                                                                                  |                                                                                                                                                                              |
|---------------------------------------------------------------------------------------------------------------------------|--------------------------------------------------------------------------------------------------------------------------------------------------|------------------------------------------------------------------------------------------------------------------------------------------------------------------------------|
| Cardoso, Simone<br>Post-doc in Ecology<br>Federal University of Juiz de Fora<br>Brazil                                    | Cardoso Rocha, Cacilda. Michele<br>Aquatic ecology<br>UFPE<br>Brazil                                                                             | Cardoso-Mohedano, José-Gilberto *<br>Environmental researcher<br>CONACYT – Instituto de Ciencias del Mar y Limnología,<br>Universidad Nacional Autónoma de México.<br>Mexico |
| Cardozo Fabrini da Silva, Maria Eduarda *<br>Biologist<br>Unip<br>Brazil                                                  | Carere, Carlo<br>Geothermal microbiologist<br>New Zealand                                                                                        | Carey, Mark<br>PhD researcher in Ecology<br>UniSA<br>Australia                                                                                                               |
| Carilli, Jessica<br>Marine Scientist<br>SPAWAR Systems Center Pacific<br>United States of America (the)                   | CARIM, MARCELO<br>Cientista/Ecologia<br>IEPA<br>Brazil                                                                                           | Carion, Alessandra<br>PhD student in organism biology<br>UNamur<br>Belgium                                                                                                   |
| Carleson, Nicholas<br>PhD Student / Botany & Plant Pathology<br>Oregon State University<br>United States of America (the) | Carlin, Thomas<br>PhD Candidate in Invasion Biology and Climate Change<br>Lincoln University<br>New Zealand                                      | Carline, Robert<br>Fisheries Biologist<br>U.S. Geological Survey - retired<br>United States of America (the)                                                                 |
| Carlo, Michael<br>Ph.D. student, Biological Sciences<br>Clemson University<br>United States of America (the)              | Carlo, Tomás<br>Associate Professor of Ecology<br>Penn State University<br>United States of America (the)                                        | Carlos, Bonetto<br>Profesor-Researcher<br>Instituto de Limnología Dr. Ringuelet. CONICET-UNLP<br>Argentina                                                                   |
| Carlos, Chávez-Mercado<br>Professor<br>National Autonomous University of Mexico (UNAM)<br>Mexico                          | Carlson, Bruce<br>Associate Professor of Biology<br>Washington University in St. Louis<br>United States of America (the)                         | Carlson, Bruce<br>Professor emeritus<br>University of Michigan<br>United States of America (the)                                                                             |
| Carlson, Deanne<br>PhD Student, Forest Policy<br>Oregon State University<br>United States of America (the)                | Carlson, Nora<br>Postdoctoral Researcher in Biology<br>University of St Andrews<br>United Kingdom of Great Britain and Northern Ireland<br>(the) | Carmel, Brendan<br>Veterinary Surgeon<br>Australia                                                                                                                           |
| Carmel Gross, Ilana<br>Phd student<br>Bar-Ilan University<br>Israel                                                       | Carmichael, Terry<br>Science Communication<br>Wildlife Conservancy of Tropical Queensland<br>Australia                                           | Carmo, Andreia<br>PhD student - Brazilian Studies<br>King's College London<br>United Kingdom of Great Britain and Northern Ireland<br>(the)                                  |
| Carmo, Felipe *<br>Biologist<br>Bocaina Biologia da Conservação<br>Brazil                                                 | Carmo, João<br>PhD student in Plant Biology<br>Unicamp<br>Brazil                                                                                 | Carmo dos Santos, Olga Bruna<br>Graduanda Ciências Biológicas<br>Centro Universitário Serra dos Órgãos<br>Brazil                                                             |



|                                                                                                                 |                                                                                                                                  |                                                                                                                                                                                           |
|-----------------------------------------------------------------------------------------------------------------|----------------------------------------------------------------------------------------------------------------------------------|-------------------------------------------------------------------------------------------------------------------------------------------------------------------------------------------|
| Carmona, Fabio<br>Associate Professor of Pediatrics<br>University of Sao Paulo<br>Brazil                        | Carmo-Neto, Antonio Marcelino do<br>PhD student<br>Museu de Zoologia da Universidade de São Paulo -<br>MZUSP<br>Brazil           | Carne, Lisa<br>Marine biologist/coral reef restoration<br>Fragments of Hope<br>Belize                                                                                                     |
| Carneiro, Camilo<br>PhD student<br>University of Aveiro<br>Portugal                                             | Carneiro, Solange<br>agronomist<br>IAPAR<br>Brazil                                                                               | Carney Almroth, Bethanie<br>Assoc. Prof. in Ecotoxicology with focus on aquatic and<br>marine organisms<br>Dept Biology and Environmental Sciences, University of<br>Gothenburg<br>Sweden |
| Carnicer, Jofre<br>Professor of ecology<br>University of Barcelona<br>Spain                                     | Carnielli, Walter *<br>Professor of Logic and the Foundations of Mathematics<br>State University of Campinas- UNICAMP<br>Brazil  | Caro, Gaël<br>Lecturer<br>University of Lorraine<br>France                                                                                                                                |
| Caro, Tim<br>Professor of Wildlife Biology<br>University of California, Davis<br>United States of America (the) | Caron, Alexandra<br>MSc Marine biology and Ecology<br>Australian Institute of Marine Science<br>Australia                        | Caron, Dominique<br>MSc student in computational and quantitative biology<br>Université de Montréal<br>Canada                                                                             |
| Caron, Thibault<br>PhD student<br>ESE - Université Paris-Sud<br>France                                          | Caron, Yannick<br>Researcher in Veterinary Parasitology and Mycology<br>Pasteur Institute<br>Cambodia                            | Caron-Beaudoin, Elyse<br>Postdoctoral fellow<br>Université de Montréal<br>Canada                                                                                                          |
| Carozzi, Marco<br>Agronomy - Air Pollution<br>Agroscope<br>Switzerland                                          | Carpaneto, Giuseppe<br>Professor of Animal Biodiversity and Biogeography<br>Department of Sciences, Roma Tre University<br>Italy | Carpenter, Angela<br>Visiting researcher in Marine Environmental Policy and<br>Governance<br>University of Leeds<br>United Kingdom of Great Britain and Northern Ireland<br>(the)         |
| Carpenter, Edward<br>Professor<br>San Francisco State University<br>United States of America (the)              | Carpenter, Geoffrey<br>Biologist<br>University of Oklahoma<br>United States of America (the)                                     | Carpintero, Óscar<br>Associate Professor of Applied Economics<br>University of Valladolid<br>Spain                                                                                        |
| Carqueville, Nils<br>Professor in Mathematics<br>University of Vienna, Erwin Schrödinger Institute<br>Austria   | Carr, Dick<br>Conservation biologist<br>Private<br>South Africa                                                                  | Carr, Jamie<br>PhD Candidate, Earth and Environment<br>University of Leeds<br>United Kingdom of Great Britain and Northern Ireland<br>(the)                                               |

|                                                                                                                                           |                                                                                                                                        |                                                                                                                                          |
|-------------------------------------------------------------------------------------------------------------------------------------------|----------------------------------------------------------------------------------------------------------------------------------------|------------------------------------------------------------------------------------------------------------------------------------------|
| Carr, Jamie<br>Conservation biologist<br>IUCN<br>United Kingdom of Great Britain and Northern Ireland (the)                               | Carr, Jennifer<br>Biologisy<br>Salem State University<br>United States of America (the)                                                | Carrara, Arnaud<br>Senior Researcher, carbon cycle in terrestrial ecosystems<br>Centro de Estudios ambientales del Mediterraneo<br>Spain |
| Carrasco, Eric *<br>Wildlife technician<br>Ministry of environment and natural resources<br>Dominican Republic (the)                      | Carrasco, L. Roman<br>Assistant Professor in Conservation Science and Sustainability<br>National University of Singapore<br>Singapore  | Carrasco-Fenech, Francisco<br>Professor of Accounting<br>Universidad Pablo de Olavide, de Sevilla<br>Spain                               |
| Carrascosa, Jaime<br>Science Education<br>University of Valencia<br>Spain                                                                 | Carrascosa, Jose M.<br>Professor of Biochemistry and Molecular Biology<br>Faculty of Sciences, Universidad Autónoma de Madrid<br>Spain | Carrasquilla, Mauricio<br>PhD candidate<br>University of Victoria<br>Canada                                                              |
| Carré, Matthieu<br>Research Scientist, Earth science<br>CNRS-Sorbonne Universités-IRD-MNHN, UMR7159<br>LOCEAN Laboratory, Paris<br>France | CARREIRA, JOSÉ A.<br>University Professor - Ecology<br>Spain                                                                           | Carreras, Carlos<br>Associate Professor<br>University of Barcelona<br>Spain                                                              |
| Carretero, Miguel A.<br>Senior researcher<br>CIBIO-InBIO University of Porto<br>Portugal                                                  | Carretero Pinzon, Xyomara<br>Primatologist<br>Zocay Project<br>Colombia                                                                | Carreton, Marta<br>PhD Student, Marine Science<br>Spanish National Research Council (ICM-CSIC)<br>Spain                                  |
| Carrico, Amanda<br>Assistant Professor of Environmental Studies<br>University of Colorado<br>United States of America (the)               | Carrico, Rita<br>PhD Student in Marine Biology<br>University of the Azores<br>Portugal                                                 | Carricondo-Sanchez, David<br>PhD candidate in Ecology<br>Inland Norway University of Applied Sciences<br>Norway                          |
| Carrié, Romain<br>Postdoc researcher in Landscape Ecology<br>Lund University<br>Sweden                                                    | Carrillo, Presentación<br>Universidad de Granada<br>Spain                                                                              | Carrion, Steven *<br>Marine Systems and Policies<br>University of Edinburgh<br>United States of America (the)                            |
| Carriquiry, Jose<br>Senior Research Profesor<br>University of Baja California<br>Mexico                                                   | Carro Linares, Manuel<br>Associate professor, Computer Science<br>Technical University of Madrd<br>Spain                               | Carroll, Alan<br>Physicist<br>Brookhaven National Laboratory - Retired<br>United States of America (the)                                 |
| Carroll, Carlos<br>Ecologist<br>Klamath Center for Conservation Research<br>United States of America (the)                                | Carroll, Kathleen<br>PhD Candidate Ecology<br>Montana State University<br>United States of America (the)                               | Carroll, Larina<br>M.Sc.<br>Canada                                                                                                       |

|                                                                                                                                                                    |                                                                                                                                             |                                                                                                            |
|--------------------------------------------------------------------------------------------------------------------------------------------------------------------|---------------------------------------------------------------------------------------------------------------------------------------------|------------------------------------------------------------------------------------------------------------|
| Carroll, Ron *<br>Ecology, Professor Emeritus<br>University of Georgia<br>United States of America (the)                                                           | Carson, Tobin<br>DO<br>United States of America (the)                                                                                       | Carstens, Kate<br>Researcher<br>University of Cape Town<br>South Africa                                    |
| Carstensen, Laurence<br>Professor of Geography<br>Virginia Polytechnic Institute and State University<br>United States of America (the)                            | Carter, Craig<br>Adjunct Professor, School of Engineering and Information<br>Technology<br>Murdoch University<br>Australia                  | Carter, Kelli<br>PhD candidate<br>University of South Florida<br>United States of America (the)            |
| Carter, Matt<br>PhD Student<br>Plymouth University<br>United Kingdom of Great Britain and Northern Ireland<br>(the)                                                | Carter, Sarah<br>PhD candidate<br>Wageningen University<br>Netherlands (the)                                                                | Carteret, Marion<br>Researcher in environmental chemistry<br>France                                        |
| Carthey, Alexandra J.R.<br>Macquarie University Research Fellow, Terrestrial Ecology<br>Macquarie University<br>Australia                                          | Cartier-Michaud, Thomas<br>Post-doctoral researcher, plasma physics and applied<br>mathematics<br>CNRS - Université Aix-Marseille<br>France | Carturan, Bruno<br>PhD student<br>UBCO<br>Canada                                                           |
| Cartwright, Samantha<br>Conservation biology<br>Wildlife Trust<br>United Kingdom of Great Britain and Northern Ireland<br>(the)                                    | Caruzo, Maria Beatriz R.<br>Professor, Botany<br>Universidade Federal de São Paulo<br>Brazil                                                | Carvajal, Jose<br>Research Scientist<br>Western Australian Museum<br>Australia                             |
| Carvajal-Cogollo, Juan E.<br>Doctor of Science - Research Line in Biodiversity and<br>Conservation<br>Universidad Pedagógica y Tecnológica de Colombia<br>Colombia | Carvalho, Luisa<br>Researcher<br>University of Brasília<br>Brazil                                                                           | Carvalho, Adriana<br>Professor/Ecological Economics<br>Federal University of Rio Grande do Norte<br>Brazil |
| Carvalho, Ana<br>Masters Student<br>Universidade de Brasília<br>Brazil                                                                                             | Carvalho, Antonio Bernardo<br>Population geneticist<br>UFRJ<br>Brazil                                                                       | Carvalho, Bruno<br>Postdoctoral fellow, Ecology of Infectious Diseases<br>Instituto Oswaldo Cruz<br>Brazil |
| Carvalho, Filipe<br>PhD candidate in Wildlife Biology<br>University of Helsinki<br>Finland                                                                         | Carvalho, Gervasio<br>Professor<br>Pontifícia universidade católica do rio grande do sul<br>Brazil                                          | Carvalho, João<br>PhD Student<br>University of Aveiro<br>Portugal                                          |

|                                                                                                                                                                     |                                                                                                                                         |                                                                                                                                         |
|---------------------------------------------------------------------------------------------------------------------------------------------------------------------|-----------------------------------------------------------------------------------------------------------------------------------------|-----------------------------------------------------------------------------------------------------------------------------------------|
| Carvalho, Joaquim<br>Associated researcher (retired)<br>University of São Paulo<br>Brazil                                                                           | Carvalho, Marcos André<br>Director of the Instituto de Biociências<br>Universidade Federal de Mato Grosso<br>Brazil                     | Carvalho, Natacha<br>Scientific Project Officer - Fisheries<br>Joint Research Centre (JRC) of the European Commission<br>Italy<br>Italy |
| Carvalho, Silvia Méri<br>Geography Teacher<br>Ponta Grossa State University<br>Brazil                                                                               | Carvalho, Tayane Costa<br>Forest Engineer/Msc Student of Tropical Forest Sciences<br>National Institute of Amazonian Research<br>Brazil | Carvalho, Tiago<br>Postdoctoral/Biology<br>Universidade Federal do Rio Grande do Sul<br>Brazil                                          |
| Carvalho de Carvalho, Camila<br>Biologist<br>Mamirauá Institute for Sustainable Development<br>Brazil                                                               | CARVALHO JUNIOR, WALDIR<br>Soil Researcher - Pedologist<br>Embrapa<br>Brazil                                                            | Carvalho Ribeiro, Sónia<br>Associate Professor<br>Universidade Federal de Minas Gerais<br>Brazil                                        |
| Carvalho Sobrinho, Jefferson<br>Full Professor<br>UNIVASF<br>Brazil                                                                                                 | Carvalho, Gastón O.<br>Assistant Professor<br>Pontificia Universidad Católica de Valparaíso<br>Chile                                    | CARVALLO RUIZ, MARÍA GISELA<br>ASSOCIATE RESEARCH SCIENTIST<br>CENTRO DE INVESTIGACIÓN EN ALIMENTACIÓN Y<br>DESARROLLO<br>Mexico        |
| Carver, Stephen<br>Director / Senior Lecturer<br>Wildland Research Institute / University of Leeds<br>United Kingdom of Great Britain and Northern Ireland<br>(the) | Cary, Stephen (Craig)<br>Professor<br>University of Waikato<br>New Zealand                                                              | Casadevall, Margarida<br>Biology Professor at University<br>Girona University<br>Spain                                                  |
| CASADO, Carmen M.<br>Associate Professor, Inorganic Chemistry<br>Universidad Autónoma de Madrid<br>Spain                                                            | Casals, Robert<br>Public Administration<br>European Council<br>Belgium                                                                  | Casano, Leonardo *<br>Professor of Plant Physiology<br>Universidad de Alcalá<br>Spain                                                   |
| Casanova, Michelle<br>Botanist<br>Federation University Australia<br>Australia                                                                                      | Casanova-Saez, Ruben<br>PhD plant science<br>Umeå Plant Science Centre<br>Sweden                                                        | Casares, María Victoria<br>Professor<br>Universidad del Salvador<br>Argentina                                                           |
| Casas, Alejandro<br>Researcher in ecology and evolution of genetic resources<br>UNAM<br>Mexico                                                                      | Casas, Fabian<br>Postdoc<br>University of Maryland<br>United States of America (the)                                                    | Casas, Isabel<br>Doctor in biology<br>University of Girona<br>Spain                                                                     |
| Casas-Ruiz, Joan P.<br>Post-doc researcher<br>Université du Québec à Montréal (UQAM)<br>Canada                                                                      | Casazza, Lorraine<br>Paleoecology<br>Al Akhawayn University<br>Morocco                                                                  | Caselle, Jennifer<br>Research Biologist<br>University of California Santa Barbara<br>United States of America (the)                     |

|                                                                                                                                                     |                                                                                                                                                                           |                                                                                                                                                                                                    |
|-----------------------------------------------------------------------------------------------------------------------------------------------------|---------------------------------------------------------------------------------------------------------------------------------------------------------------------------|----------------------------------------------------------------------------------------------------------------------------------------------------------------------------------------------------|
| Caselli, Christini<br>Postdoc<br>Universidade Federal Rural de Pernambuco<br>Brazil                                                                 | Cashion, Madeline<br>Masters of Science Candidate, Oceans and Fisheries<br>Science<br>Institute for the Oceans and Fisheries, University of<br>British Columbia<br>Canada | Casimiro-Soriguer, Ines<br>Spain                                                                                                                                                                   |
| CASOTTI, RAFFAELLA<br>researcher<br>Stazione Zoologica Anton Dohrn<br>Italy                                                                         | Casper, Gary<br>Ecology<br>University of Wisconsin-Milwaukee<br>United States of America (the)                                                                            | Cass, Dr Noel<br>Senior Research Associate, Research Centre on Dynamics<br>of Energy, Mobility and Demand<br>Lancaster University<br>United Kingdom of Great Britain and Northern Ireland<br>(the) |
| Cassab, Gladys<br>Professor / Plant Molecular Biology<br>Instituto de Biotecnología, Universidad Nacional<br>Autónoma de México<br>Mexico           | Cassaigne Guasco, Ivonne<br>Wildlife Veterinarian<br>UNAM<br>Mexico                                                                                                       | Cassano, Camila Righetto<br>Full professor / ecology<br>Santa Cruz State University<br>Brazil                                                                                                      |
| Cassey, Phill<br>Australia                                                                                                                          | Cassidy, Kira<br>Wolf Research Associate<br>Yellowstone Forever/National Park Service<br>United States of America (the)                                                   | Cassidy, Lin<br>Researcher, social-ecological systems<br>Botswana                                                                                                                                  |
| Cassin Sackett, Loren<br>Assistant Professor, Evolutionary Biology<br>University of South Florida<br>United States of America (the)                 | Cassinello, Jorge<br>Científico Titular<br>CSIC<br>Spain                                                                                                                  | Casso, Maria<br>PhD Student<br>CEAB - CSIC<br>Spain                                                                                                                                                |
| Cassotta, Sandra<br>International Environmental Law<br>Aalborg University, Department of Law<br>Denmark                                             | Castañares, Normahilda<br>Filmmaker<br>Several institutions<br>Mexico                                                                                                     | Castaño, Jose<br>Professor / Physics<br>Universidad Autónoma de Madrid<br>Spain                                                                                                                    |
| Castaño, Nicolas<br>Biologist MSc<br>Instituto Sinchi<br>Colombia                                                                                   | Castaños, Fernando<br>Electrical Engineering<br>Cinvestav-IPN<br>Mexico                                                                                                   | Castaños, Fernando<br>Social scientist<br>National Autonomous University of Mexico<br>Mexico                                                                                                       |
| Castaños, Luis Octavio<br>Professor-Researcher<br>Instituto Tecnológico y de Estudios Superiores de<br>Monterrey (ITESM), Campus Santa Fe<br>Mexico | Castaños, Octavio<br>Professor<br>Universidad Nacional Autónoma de México<br>Mexico                                                                                       | CASTEGE, Iker<br>Researcher<br>Centre de la Mer de Biarritz<br>France                                                                                                                              |

|                                                                                                                                                                |                                                                                                                                        |                                                                                                                          |
|----------------------------------------------------------------------------------------------------------------------------------------------------------------|----------------------------------------------------------------------------------------------------------------------------------------|--------------------------------------------------------------------------------------------------------------------------|
| Castelblanco-Martínez, Delma Nataly<br>Research Fellow<br>Consejo Nacional de Ciencia Y Tecnología<br>Mexico                                                   | castellano, eduardo ernesto<br>Professor<br>Instituto fr Física de São Carlos - USP<br>Brazil                                          | Castellano, Gabriela<br>Associate professor, Physics<br>University of Campinas - UNICAMP<br>Brazil                       |
| Castellano, Immacolata<br>Researcher/Marine Biochemistry and Biotechnology<br>Stazione Zoologica Anton Dohrn of Naples<br>Italy                                | Castellanos, Javier<br>Profesor, Soil Sciences<br>Instituto Tecnológico de Roque, ITN<br>Mexico                                        | Castellanos Castro, Carolina<br>Instituto Alexander von Humboldt<br>Colombia                                             |
| Castello, Jorge Pablo<br>Full Professor<br>Institute of Oceanography; Federal University of Rio Grande<br>Brazil                                               | Castello, Leandro<br>Assistant Professor<br>Virginia Tech<br>United States of America (the)                                            | Castello-Branco, Cristiana<br>Phd student<br>Museu Nacional/UFRJ<br>Brazil                                               |
| Castelo Branco, Jeffer<br>Master of Science<br>NEPSSA - Universidade Federal de São Paulo<br>Brazil                                                            | Castiglioni, Chiara elena<br>Biologia ambiental<br>Italy                                                                               | Castilho, Carolina<br>Plant Ecology<br>Embrapa Roraima<br>Brazil                                                         |
| Castilla, Antonio<br>Postdoctoral fellow<br>Centre for Applied Ecology "Prof. Baeta Neves"/INBIO<br>Portugal                                                   | Castillo, Carlos<br>Biologist<br>NA<br>Mexico                                                                                          | Castillo, Olga Lucía<br>Full Professor<br>Universidad Javeriana<br>Colombia                                              |
| Castillo, Simon<br>PhD candidate<br>Department of Ecology and Institute of ecology and biodiversity of Chile. Pontifical Catholic University of Chile<br>Chile | Castillo, Yerko<br>Environmental Scientist<br>Austral University<br>Chile                                                              | Castillo Monroy, Andrea del Pilar<br>Assistant Professor<br>Universidad Pedagógica y Tecnológica de Colombia<br>Colombia |
| Castillo Sanchez, Carlos<br>Biologist<br>Mexico                                                                                                                | Castillo Sandoval, Fermin Sergio<br>Technical Academic, hydrobiologist<br>UNAM, Instituto de Ciencias del Mar y Limnologia<br>Mexico   | Castillo Velázquez, Rosalina<br>Master inScience<br>Posgrado en ciencias del mar y limnología UNAM<br>Mexico             |
| Castillo-Briceno, Patricia<br>Research Professor<br>Group Equatorial Biome & Ocean Acidification EBIOAC,<br>Universidad Laica Eloy Alfaro de Manabi<br>Ecuador | Castley, Guy<br>Senior Lecturer / Head of Ecology and Biodiversity<br>Griffith University, Griffith School of Environment<br>Australia | Castro, Antonio J<br>Assistant Professor<br>Idaho State University<br>United States of America (the)                     |

|                                                                                                                                            |                                                                                                                                               |                                                                                                               |
|--------------------------------------------------------------------------------------------------------------------------------------------|-----------------------------------------------------------------------------------------------------------------------------------------------|---------------------------------------------------------------------------------------------------------------|
| Castro, Jorge<br>Ecology, Associate Professor<br>University of Granada<br>Spain                                                            | Castro, José J.<br>Lecturer in Fish Population Dynamic and Fisheries<br>Universidad de Las Palmas de Gran Canaria, Canary<br>Islands<br>Spain | Castro, Mariela<br>Postdoc; Biologist<br>Universidade de São Paulo<br>Brazil                                  |
| Castro, Telma *<br>Profesor<br>Universidad Nacional Autónoma de México<br>Mexico                                                           | Castro, Victor *<br>Biólogo , ecólogo, ornitólogo<br>Universidade Federal do Mato Grosso, Brasil<br>Brazil                                    | Castro-Cobo, Sara<br>PhD Student<br>Doñana Biological Station<br>Spain                                        |
| Catalá, Myriam<br>Associate Professor of Cell Biology<br>Rey Juan Carlos University<br>Spain                                               | Catalan, Nuria<br>Post-doctoral researcher<br>Catalan Institute for Water Research<br>Spain                                                   | Catalán, Núria<br>Postdoctoral researcher in biogeochemistry<br>Catalan Institute for Water Research<br>Spain |
| Catalinas, Marta<br>Spain                                                                                                                  | Catania, Shantel<br>Herpetology<br>Canada                                                                                                     | Catenacci, Fernanda<br>Botanist<br>Instituto Federal Catarinense - IFC - Campus Ibirama<br>Brazil             |
| Cates, Kelly<br>Graduate Student<br>University of Alaska<br>United States of America (the)                                                 | Cates, Robert<br>Undergraduate of Biochemistry, BioPhyics, and Molecular<br>Biology<br>Whitman College<br>United States of America (the)      | Cato, Lizzie<br>Wildlife biologist<br>United States of America (the)                                          |
| catoni, carlo<br>ecologist<br>freelance<br>Italy                                                                                           | CATRY, Thibault<br>Researcher, Remote sensing of Environment<br>Institut de Recherche pour le Développement IRD<br>France                     | Cattaneo, Claudio<br>Associate professor Ecological Economics<br>UAB - Barcelona<br>Spain                     |
| Cattaneo-Vietti, Riccardo<br>Past Professor in Ecology<br>University of Genoa<br>Italy                                                     | Catzefis, Francois<br>Research Director, biologist<br>University of Montpellier<br>France                                                     | Cauldwell, Andrew<br>Ecologist<br>Environmental Resources Management<br>South Africa                          |
| Cavada, Françoise<br>Doctorate Cadidate Coastal and Marine Conservation<br>Universidad Simon Bolivar<br>Venezuela (Bolivarian Republic of) | Cavalcanti, Clóvis<br>President-Elect<br>International Society for Ecological Economics (ISEE)<br>Brazil                                      | CAVALCANTI, TACIANA<br>Researcher, Botanist<br>CAVALCANTI<br>Brazil                                           |
| Cavalheiro, Esper<br>Professor, Dept. Neurology and Neurosurgery<br>Escola Paulista de Medicina/UNIFESP<br>Brazil                          | Cavallari, Marcelo<br>Researcher/ Population Genetics, Germplasm<br>Conservation<br>Embrapa<br>Brazil                                         | Cavalli, Izaltina<br>UESC<br>Brazil                                                                           |

|                                                                                                                                     |                                                                                                           |                                                                                                                              |
|-------------------------------------------------------------------------------------------------------------------------------------|-----------------------------------------------------------------------------------------------------------|------------------------------------------------------------------------------------------------------------------------------|
| CAVALLI, RICARDO *<br>PROFESSOR, MD, PHD<br>RIBEIRÃO PRETO MEDICAL SCHOOL, UNIVERSITY OF SÃO PAULO<br>Brazil                        | Cavarzere, Vagner<br>Professor<br>Universidade Tecnológica Federal do Paraná<br>Brazil                    | Caviedes, Julián<br>Researcher<br>Centre for Local Development, Education and Interculturality (CEDEL)<br>Chile              |
| Cavin, Lionel *<br>PhD, Curator, Palaeontology<br>Natural History Museum, Geneva<br>Switzerland                                     | Cayetano, Denver *<br>Forest Biologist<br>University of Belize Environmental Research Institute<br>Belize | Cayres, Flávia<br>Student<br>Usp<br>Brazil                                                                                   |
| Cayuela, Hugo<br>Post-doctoral researcher<br>Institut de Biologie Intégrative et des Systèmes (IBIS),<br>Université Laval<br>Canada | Cayuela, Luis<br>Assistant Professor / Ecology<br>Universidad Rey Juan Carlos<br>Spain                    | Cazelles, Bernard<br>Professor (Biomathematics)<br>Université Pierre et Marie Curie<br>France                                |
| Cazelles, Kevin<br>Post-doc fellow / ecology<br>University of Guelph<br>Canada                                                      | Cazetta, Eliana<br>Full Professor/Ecology<br>Universidade Estadual de Santa Cruz - UESC<br>Brazil         | Cazorla, Carla *<br>Ph. D<br>División Entomología Museo de La Plata, Argentina.<br>CONICET, FCNyM/UNLP<br>Argentina          |
| Cazorzi, Federico<br>Associate Professor<br>University of Udine<br>Italy                                                            | ÇBoyero, Luz<br>Research Professor<br>University of the Basque Country<br>Spain                           | Ceballos, Gerardo<br>Professor. Ecology and Conservatuon<br>Universidad Nacional Autonoma de Mexico<br>Mexico                |
| Cecalcula, Bioinfo<br>Education<br>ULA<br>Venezuela (Bolivarian Republic of)                                                        | Cecatti, Jose Guilherme<br>Full Professor of Obstetrics<br>University of Campinas<br>Brazil               | Ceccantini, Gregorio<br>Professor - Doctor<br>University of Ssao Paulo<br>Brazil                                             |
| Cecchetti, Martina<br>PhD researcher<br>University of Exeter<br>United Kingdom of Great Britain and Northern Ireland (the)          | Ceccon, Paolo<br>Italy                                                                                    | Cechet, Ricardo *<br>Oceanographer<br>UFSC<br>Brazil                                                                         |
| Cechin, Sonia<br>Professor Titular/Zooogia<br>Universidade Federal de Santa Maria<br>Brazil                                         | Cecil, John<br>Vice President for Stewardship<br>New Jersey Audubon<br>United States of America (the)     | Cecilia, Hélène<br>Engineer in bioinformatics and modelling<br>French National Institute for Agricultural Research<br>France |



|                                                                                                                                                                                                                                                                                    |                                                                                                            |                                                                                                                                                                                                                                                       |
|------------------------------------------------------------------------------------------------------------------------------------------------------------------------------------------------------------------------------------------------------------------------------------|------------------------------------------------------------------------------------------------------------|-------------------------------------------------------------------------------------------------------------------------------------------------------------------------------------------------------------------------------------------------------|
| Cedillo Barron, Leticia<br>Senior Research<br>Centro de Investigación y Estudios avanzados IPN<br>Mexico                                                                                                                                                                           | Ceia, Ricardo<br>Biology<br>Sociedade Portuguesa para o Estudo das Aves (BirdLife<br>Portugal)<br>Portugal | Celander, Malin<br>Professor in zoophysiology/Ecotoxicology<br>University of Gothenburg, Department of Biological and<br>Environmental Sciences<br>Sweden                                                                                             |
| Celentano, Danielle *<br>Professor<br>Programa de Pós-graduação em Agroecologia.<br>Universidade Estadual do Maranhão (UEMA)<br>Brazil                                                                                                                                             | Céline, Teplitsky<br>Researcher<br>CNRS<br>France                                                          | Celis, Rafael<br>Economist<br>ProDesarrollo Internacional<br>Costa Rica                                                                                                                                                                               |
| Celis-Diez, Juan<br>Associate Professor, Ecologist<br>Pontificia Universidad Católica de Valparaíso<br>Chile                                                                                                                                                                       | Celis-Plá, Paula<br>Research in University of Playa Ancha<br>Chile                                         | Celorio-Mancera, Maria de la Paz<br>Research Analyst, Population Genetics<br>Stockholm University<br>Sweden                                                                                                                                           |
| Celuch, Martin<br>Ecologist, Bat specialist<br>Slovak Bat Conservation Society<br>Slovakia                                                                                                                                                                                         | Cely, Jose Eugenio<br>Biologo<br>Universidad Distrital francisco Jose de Caldas<br>Colombia                | Centia, Jet<br>Environmental Science<br>University of San Carlos<br>Philippines (the)                                                                                                                                                                 |
| CENTENO, CELIA KARINA<br>Graduate in Genetic, Professor of Biology and PhD<br>Student<br>Universidad Nacional de Misiones, Facultad de Ciencias<br>Exactas Químicas y Naturales. Instituto de Biología<br>Subtropical, Grupo de investigación de Genética<br>aPLICADA<br>Argentina | Centeno - Garcia, Elena<br>Researcher /Geology<br>Universidad Nacional Autónoma de México<br>Mexico        | Centore, Laura<br>Master's student<br>University of Goettingen<br>Germany                                                                                                                                                                             |
| Cerabolini, Bruno E.L.<br>Full Professor/Environmental and Applied Botany<br>DiSTA-University of Insubria (Varese)<br>Italy                                                                                                                                                        | Cerasoli, Josianne *<br>Professor of History<br>University of Campinas - Unicamp<br>Brazil                 | Cerchiara, Jack<br>Biology<br>University of Washington<br>United States of America (the)                                                                                                                                                              |
| Cerda, Xim<br>Associate Professor of Research / Animal Ecology<br>Estación Biológica de Doñana (CSIC)<br>Spain                                                                                                                                                                     | Cerdeira, Hilda<br>Voluntary Professor, Physics<br>Instituto de Física Teórica, UNESP, São Paulo<br>Brazil | CERF, marianne<br>Researcher Ergonomy<br>Institut National de la Recherche Agronomique<br>France                                                                                                                                                      |
| Ceríaco, Luis<br>Curator of Herpetology<br>Museu Nacional de História Natural e da Ciência<br>Portugal                                                                                                                                                                             | Ceriello, Hellen<br>Biosciences Master Student<br>Sao Paulo State University (UNESP)<br>Brazil             | Cermak, Jan<br>Whole tree (and stand) eco-physiology, water relations<br>and aboveground as well as belowground<br>macrostructuremacrostructure<br>Mendel Univ. Brno, Dept.of Forest Botany, Dendrology<br>and Geobiocenology<br>Czech Republic (the) |

|                                                                                                                                      |                                                                                                                                                                                  |                                                                                                                                                         |
|--------------------------------------------------------------------------------------------------------------------------------------|----------------------------------------------------------------------------------------------------------------------------------------------------------------------------------|---------------------------------------------------------------------------------------------------------------------------------------------------------|
| Cerqueira, Pablo<br>PhD. Candidate<br>Museu Paraense Emílio Goeldi - Molecular and<br>Ornithology Laboratory<br>Brazil               | Cerqueira, Rui<br>Professor of Ecology<br>Universidade Federal do Rio de Janeiro<br>Brazil                                                                                       | Cerrano, Carlo<br>Marine zoology<br>Polytechnic University of Marche<br>Italy                                                                           |
| Cervera, Juan Lucas<br>Full Professor in Zoology<br>University of Cadiz<br>Spain                                                     | Cervera, Manuel<br>Associate Professor, Physicist<br>Universidad Autónoma de Madrid<br>Spain                                                                                     | Cesar, Augusto<br>Professor<br>Unifesp<br>Brazil                                                                                                        |
| César de Sá, Nuno<br>Research Fellow in Earth Observation<br>Coimbra College of Agriculture<br>Portugal                              | Céspedes Arias, Laura<br>Master Student (Biological Sciences)<br>Universidad de los Andes<br>Colombia                                                                            | CEZILLY, FRANK<br>PROFESSOR<br>UNIVERSITE DE BOURGOGNE-FRANCHE COMTE<br>France                                                                          |
| Chaboo, Caroline<br>Entomology<br>University of Nebraska-Lincoln<br>United States of America (the)                                   | Chabot, Chris L.<br>Researcher and Lecturer (Biology)<br>California State University, Northridge<br>United States of America (the)                                               | Chacón-Madrigal, Estua<br>Universidad de Costa Rica<br>Costa Rica                                                                                       |
| Chadburn, Helen<br>United Kingdom of Great Britain and Northern Ireland<br>(the)                                                     | Chadha, Sonia<br>India                                                                                                                                                           | Chaffey, Nigel<br>Botanist<br>Bath Spa University<br>United Kingdom of Great Britain and Northern Ireland<br>(the)                                      |
| Chafin, Tyler<br>Evolutionary Biology<br>University of Arkansas<br>United States of America (the)                                    | Chagnon, Pierre-Luc<br>Assistant Professor<br>Université de Montréal<br>Canada                                                                                                   | Chai, Shauna-Lee<br>Research Scientist<br>Canada                                                                                                        |
| Chaimovich, Hernan<br>Emeritus Professor of the Institute of Chemistry<br>Universidade de São Paulo<br>Brazil                        | Chajec, Łukasz<br>Biologist, Researcher<br>Department of Animal Histology and Embryology, Faculty<br>of Biology and Environmental Protection, University of<br>Silesia<br>Poland | Chakarov, Nayden<br>Researcher, Animal Behaviour<br>Bielefeld University<br>Germany                                                                     |
| Chakrabarty, Prosanta<br>Ichthyologist/Associate Professor<br>Louisiana State University<br>United States of America (the)           | Chakraborty, Arindam<br>DST INSPIRE Fellow<br>Birbal Sahni Institute of Palaeosciences<br>India                                                                                  | Chakraborty, Subrata<br>Professor<br>Dibrugarh University<br>India                                                                                      |
| CHAKRAVARTI, ASIT KUMAR<br>FORMER VICE CHANCELLOR<br>BIDHAN CHANDRA KRISHI VISWAVIDYALAYA(STATE<br>AGRICULTURAL UNIVERSITY)<br>India | Chakravarti, Rajiva<br>Dept of Mathematics (retired)<br>Cochin University of Science and Technology<br>India                                                                     | CHALIFOUR, Julien<br>Scientific officer, MPA manager<br>Association de Gestion de la Réserve Naturelle de Saint<br>Martin<br>Saint Martin (French part) |

|                                                                                                                           |                                                                                                                            |                                                                                                                                                                                                                           |
|---------------------------------------------------------------------------------------------------------------------------|----------------------------------------------------------------------------------------------------------------------------|---------------------------------------------------------------------------------------------------------------------------------------------------------------------------------------------------------------------------|
| Challacombe, Matt<br>theoretical chemistry, biophysics<br>NA<br>United States of America (the)                            | Chalvet-Monfray, Karine<br>Professor Biostatitics and Epidemiology<br>INRA - VetAgro Sup<br>France                         | Chambel, Antonio<br>Assistant Professor Hydrogeology, President of the<br>International Association of Hydrogeologists (IAH)<br>University of Evora and International Association of<br>Hydrogeologists (IAH)<br>Portugal |
| Chamberlain, Sarah<br>Penn State University<br>United States of America (the)                                             | Chames, Patrick<br>Team leader<br>CRCM<br>France                                                                           | Chamon, Carine<br>Professor/Zoology<br>Universidade Federal do Tocantins<br>Brazil                                                                                                                                        |
| CHAMPION, Antony<br>Researcher<br>French Research Institute for Developpement (IRD)<br>France                             | Chamy, Paula *<br>Research associate<br>NEPAM/Universidade Estadual de Campinas<br>Brazil                                  | Chan, Andrea<br>PhD Student in Ecology<br>Penn State University<br>United States of America (the)                                                                                                                         |
| Chan, Benny K.K.<br>Professor<br>Academia Sinica<br>Hong Kong                                                             | Chan, Kai<br>Professor, Applied Ecology and Sustainability Science<br>University of British Columbia<br>Canada             | Chan, Weili<br>Honours Student<br>School of Chemistry and Molecular Biosciences<br>Australia                                                                                                                              |
| Chan, Yvonne *<br>Conservation Genetics<br>Iolani School<br>United States of America (the)                                | Chandler, Chris<br>University of Nottingham<br>United Kingdom of Great Britain and Northern Ireland<br>(the)               | Chang, Chih-Han<br>Assistant Research Scientist<br>Johns Hopkins University<br>United States of America (the)                                                                                                             |
| Chang, Chih-Ning<br>Molecular and Cellular Biology<br>Oregon State University<br>United States of America (the)           | Chao, Jung-Tai<br>Senior Scientist (retired)<br>Taiwan Forestry Research Institute<br>Taiwan                               | Chao, Labbish<br>Ichthyology<br>National Museum of Marine Biology & Aquarium<br>Taiwan                                                                                                                                    |
| Chaparro, Ruperto<br>Director<br>Puerto Rico Sea Grant<br>Puerto Rico                                                     | Chaparro-Herrera, Sergio<br>Asociación Bogotana de Ornitología (ABO)<br>Colombia                                           | Chapin, Kenneth<br>Postdoctoral scholar<br>UN Davis<br>United States of America (the)                                                                                                                                     |
| Chapin III, F Stuart<br>Professor Emeritus of Ecology<br>University of Alaska Fairbanks<br>United States of America (the) | Chaplen, Frank<br>Associate Professor, Biological Engineering<br>Oregon State University<br>United States of America (the) | Chapman, Arthur<br>Retired Scientist<br>Australian Biodiversity Information Services<br>Australia                                                                                                                         |
| Chapman, Colin<br>Canda Research Chair<br>McGill University<br>Canada                                                     | Chapman, John<br>Adjunct Professor/Marine Ecology<br>Oregon State University<br>United States of America (the)             | Chapman, Julie<br>Physician Assistant, Family Practice_retired<br>United States of America (the)                                                                                                                          |

|                                                                                                                                                                            |                                                                                                                   |                                                                                                                    |
|----------------------------------------------------------------------------------------------------------------------------------------------------------------------------|-------------------------------------------------------------------------------------------------------------------|--------------------------------------------------------------------------------------------------------------------|
| Chapman, Philip<br>PhD student, tropical forest ecology<br>Imperial College London<br>United Kingdom of Great Britain and Northern Ireland<br>(the)                        | Chapman, Sarah<br>PhD Candidate in Environmental Science<br>University of Queensland<br>Australia                 | Chapman AO, Simon<br>Emeritus Professor<br>School of Public Health, University of Sydney<br>Australia              |
| Chappuis, Eglantine<br>Ecology<br>Switzerland                                                                                                                              | Chapron, Guillaume<br>Associate Professor in Ecology<br>Swedish University of Agricultural Sciences<br>Sweden     | Chapuis, Elodie<br>researcher<br>IRD<br>France                                                                     |
| Chapuis, Jean-Louis<br>Searcher (Ecology)<br>National Museum of Natural History<br>France                                                                                  | Chapuisat, Michel<br>Professor<br>University of Lausanne<br>Switzerland                                           | CHARABIDZE, Damien<br>Univ LILLE<br>France                                                                         |
| Charalambous, Constantinos<br>Ecology & Conservation<br>Cyprus                                                                                                             | Charalampidou, Parthena<br>PhD Agriculture<br>Greece                                                              | Charles, Catherine<br>Belgium                                                                                      |
| Charles, John<br>Entomologist<br>New Zealand                                                                                                                               | Charli, Jean-Louis<br>Professor<br>Universidad Nacional Autónoma de Mexico<br>Mexico                              | Charmantier, Anne<br>Senior researcher in Evolutionary Ecology (Directrice de Recherche)<br>CNRS<br>France         |
| Charrier, Grégory<br>Lecturer, Population Genetics<br>University of Brest, Marine Environmental Science<br>Laboratory (LEMAR, UMR 6539, UBO, CNRS, IRD, Ifremer)<br>France | Charrier, Guillaume<br>Research associate in plant ecophysiology<br>INRA<br>France                                | Charrier, Maryvonne<br>Ass Prof<br>University of Rennes<br>France                                                  |
| Charrier, Pierre<br>PhD student<br>INRA<br>France                                                                                                                          | Charriere, Guillaume<br>Assistant Professor, Cell biologist<br>Université de Montpellier, UMR 5244 IHPE<br>France | Charters, Jacob<br>Ecology and human-wildlife conflict<br>University of São Paulo<br>Brazil                        |
| Chartier, Marion<br>Ecology and evolution<br>University of Vienna<br>Austria                                                                                               | Chartrand, Kathryn<br>Senior Researcher Marine Science<br>James Cook University<br>Australia                      | Chassin-Noria, Omar<br>Research Professor /Biologist<br>Universidad Michoacana de San Nicolas de Hidalgo<br>Mexico |
| Chassot, Olivier<br>Executive Director<br>MigraMar<br>Costa Rica                                                                                                           | Chatanga, Peter<br>Ecologist<br>National University of Lesotho<br>Lesotho                                         | Chateigner, Aurélien<br>Post-doctoral fellow<br>INRA Val-de-Loire<br>France                                        |

|                                                                                                                               |                                                                                                                                  |                                                                                                                               |
|-------------------------------------------------------------------------------------------------------------------------------|----------------------------------------------------------------------------------------------------------------------------------|-------------------------------------------------------------------------------------------------------------------------------|
| Chater, Caspar<br>Plant scientist<br>IBt UNAM<br>Mexico                                                                       | Chatham, Celia<br>Ecologist<br>Prunuske Chatham, Inc.<br>United States of America (the)                                          | Chatterton, Elise<br>Research assistant, Environmental Science<br>University of Sunshine Coast<br>Australia                   |
| Chatti, Deepti<br>PhD Candidate in Environmental Studies<br>Yale University<br>India                                          | Chatti, Veena<br>Predoc<br>Max Planck Institute for Molecular Cell Biology & Genetics<br>Germany                                 | Chattopadhyay, Mitali *<br>Research Scientist<br>United States of America (the)                                               |
| Chaudhry, Muhammad jamshed Iqbal<br>Manager Research & Conservation<br>WWF-Pakistan<br>Pakistan                               | Chauhan, Ashvini<br>Associate Professor, Environmental Biotechnology<br>Florida A&M University<br>United States of America (the) | Chauke, Dikeledi Salome<br>Masters student<br>University of Limpopo<br>South Africa                                           |
| Chaumillon, Eric<br>Professor Marine Geology<br>University of La Rochelle<br>France                                           | Chauvenet, Alienor<br>Post-Doctoral Research Fellow<br>University of Queensland<br>Australia                                     | Chauvet, Eric<br>Senior scientist<br>CNRS<br>France                                                                           |
| Chauvin, Thibaud<br>Phd student in ecophysiology and ecology<br>INRA<br>France                                                | Chauvineau, Maxime *<br>Scientific officer<br>French Biodiversity Agency<br>France                                               | Chaves, Fernando<br>Photographer<br>self employed<br>Brazil                                                                   |
| Chávez, Cuauhtémoc<br>Research professor<br>Universidad autónoma Metropolitana<br>Mexico                                      | Chávez, Daniel<br>Ph.D. Student<br>Universidad Nacional Autónoma de México, Facultad de Ciencias<br>Mexico                       | Chavez Salazar, Sandra Nataly<br>Masters degree in ecology<br>Universidad Michoacana de San Nicolas de Hidalgo<br>Mexico      |
| CHAVY, Agathe<br>Biology<br>Institut Pasteur in French Guiana<br>French Guiana                                                | Chaw, Shu-Miaw<br>Distinguished Research Fellow, Plant evolution<br>Biodiversity Research Center, Academia Sinica<br>Taiwan      | Chazdon, Robin<br>Professor Emerita<br>University of Connecticut<br>United States of America (the)                            |
| CHEESMAN, DEAN<br>Professor Retired Endocrinology<br>University of California San Francisco<br>United States of America (the) | Chefaoui, Rosa M.<br>Postdoctoral fellow<br>CCMAR - Centro de Ciências do Mar<br>Portugal                                        | Chegorks, Pavel<br>Ukraine                                                                                                    |
| CHEKCHAK, Tarik<br>Director for Science and Environment<br>The Cousteau Society<br>France                                     | Chelmala, Srinivasulu<br>Professor of Zoology<br>Osmania University<br>India                                                     | Chemello, Renato<br>Associate Professor in Ecology<br>Department of Earth and Marine Sciences, University of Palermo<br>Italy |

|                                                                                                                           |                                                                                                                                                                     |                                                                                                                                           |
|---------------------------------------------------------------------------------------------------------------------------|---------------------------------------------------------------------------------------------------------------------------------------------------------------------|-------------------------------------------------------------------------------------------------------------------------------------------|
| Chen, Allen<br>Professor Research Fellow<br>Biodiversity Research Centre, Academia Sinica, Taipei<br>Taiwan               | Chen, Hua<br>Associate Professor/Forest Ecology, Wetland Ecology&<br>Restoration Ecology<br>University of Illinois at Springfield<br>United States of America (the) | Chen, Po-chia<br>Post-doctoral researcher in Biophysics<br>EMBL Heidelberg<br>Germany                                                     |
| Cheng Moon, Steven<br>Medical student<br>Free university of amsterdam<br>Netherlands (the)                                | Chenier, Sonia<br>Veterinary pathologist<br>Ministere de l'Agriculture, des Pecheries et de<br>l'Alimentation du Quebec (MAPAQ)<br>Canada                           | Chenot, Julie<br>PhD Student<br>IMBE<br>France                                                                                            |
| Chenuil, Anne *<br>Scientific researcher<br>CNRS<br>France                                                                | Cherel, Yves<br>Directeur de recherche (biology/ecology)<br>CNRS<br>France                                                                                          | Cherian, Deepak<br>Research Associate, Physical Oceanography<br>Oregon State University<br>United States of America (the)                 |
| Cherif, Mehdi<br>Associate Professor in Ecology<br>Umeå University<br>Sweden                                              | Cherikoff, Vic<br>Researcher, nutritional significance of Australian wild<br>foods in the modern diet<br>none<br>Australia                                          | Chesnais, Quentin<br>Postdoctoral researcher<br>University of California Riverside<br>United States of America (the)                      |
| Chevallier, Clément<br>PhD Candidate<br>Université du Québec à Rimouski<br>Canada                                         | Chèvre, Nathalie<br>Lecturer<br>University of Lausanne<br>Switzerland                                                                                               | Chevrainais, Marion<br>PostDoc Position in Paleontology<br>Université du Québec à Rimouski<br>Canada                                      |
| Cheyne, Susan<br>Co-Director<br>Borneo Nature Foundation<br>United Kingdom of Great Britain and Northern Ireland<br>(the) | Chhin, Sophea *<br>Senior Research<br>Centre for Biodiversity Conservation<br>Cambodia                                                                              | Chi, Daniel<br>New York Botanical Garden<br>United States of America (the)                                                                |
| Chiancone, Alessandro<br>Italy                                                                                            | Chiappa Carrara, Xavier<br>Professor<br>Universidad Nacional Autónoma de México<br>Mexico                                                                           | Chiappe, Luis<br>Curator/Evolutionary Biology<br>Natural History Museum of Los Angeles County<br>United States of America (the)           |
| Chiarati, Elisa<br>Spain                                                                                                  | Chiarello, Adriano<br>University professor/Conservation Biology<br>Universidade de São Paulo<br>Brazil                                                              | Chiarucci, Alessandro<br>Full Professor / Plant Ecology and Conservation Biology<br>Alma Mater Studiorum - University of Bologna<br>Italy |
| Chibeni, Silvio<br>Associate Professor, philosophy<br>State University of Campinas - www.unicamp.br<br>Brazil             | Chibesa, Moses<br>Lecturer-Ecology<br>The Copperbelt University<br>South Africa                                                                                     | Chiconela, Tomás<br>Associate Professor<br>Eduardo Mondlane University<br>Mozambique                                                      |

|                                                                                                                                                                     |                                                                                                                                                                                            |                                                                                                                                                     |
|---------------------------------------------------------------------------------------------------------------------------------------------------------------------|--------------------------------------------------------------------------------------------------------------------------------------------------------------------------------------------|-----------------------------------------------------------------------------------------------------------------------------------------------------|
| Chies, Tatiana *<br>Professor<br>Universidade Federal do Rio Grande do Sul<br>Brazil                                                                                | Chies Santos, Ana<br>Astronomy, Professora Adjunta<br>UFRGS<br>Brazil                                                                                                                      | Child, Matthew<br>Conservation scientist<br>South African National Biodiversity Institute<br>South Africa                                           |
| Chillon, Isabel<br>Postdoc in Molecular Biology<br>EMBL - Grenoble<br>France                                                                                        | Chin, Jammille De-Andra<br>Lecturer<br>University of Technology, Jamaica<br>Jamaica                                                                                                        | Chincarini, Andrea<br>Researcher<br>Istituto Nazionale di Fisica Nucleare<br>Italy                                                                  |
| Chinga, Javiera<br>PhD student in ecology<br>Pontificia Universidad Católica de Chile<br>Chile                                                                      | Chinn, Warren<br>Entomologist<br>Department of Conservation<br>New Zealand                                                                                                                 | Chipping, David<br>Prof. Emeritus/ Geology<br>Cal Poly State University, San Luis Obispo, CA<br>United States of America (the)                      |
| Chiriboga, Xavier<br>PhD Candidate in Chemical Ecology<br>University of Neuchatel<br>Switzerland                                                                    | Chirif, Alberto<br>Antropólogo<br>Consultor independiente<br>Peru                                                                                                                          | Chirino Miranda, Esteban *<br>Researcher professor of Hydrology<br>Universidad Laica Eloy Alfaro de Manabí<br>Ecuador                               |
| Chiron, François *<br>Lecturer<br>AgroParisTech, Université Paris-Sud, Orsay<br>France                                                                              | Chivian, Eric *<br>Founder and Former Director, Center for Health and the<br>Global Environment, Shared 1985 Nobel Peace Prize<br>Harvard Medical School<br>United States of America (the) | Choate, David<br>Visiting Assistant Professor, Wildlife Ecologist<br>University of Nevada, Las Vegas<br>United States of America (the)              |
| Chobanov, Dragan<br>Associate Professor, PhD, Zoology, Entomology<br>Institute of Biodiversity and Ecosystem Research,<br>Bulgarian Academy of Sciences<br>Bulgaria | CHOCHA MANDA, Auguste *<br>PROFESSOR<br>UNIVERSITY OF LUBUMBASHI<br>Congo (the Democratic Republic of the)                                                                                 | Chong, Kok Chung<br>Lecturer<br>Universiti Tunku Abdul Rahman<br>Malaysia                                                                           |
| Choong, Amy Mei Fun<br>Lecturer/ Biodiversity<br>National University of Singapore<br>Singapore                                                                      | Chotro, M. Gabriela<br>Professor, Psychobiology<br>University of the Basque Country UPV/EHU<br>Spain                                                                                       | Choudhury, Charisma<br>Civil Engineering/ Transport Studies<br>University of Leeds<br>United Kingdom of Great Britain and Northern Ireland<br>(the) |
| Chouvelon, Tiphaine<br>Researcher in marine ecology<br>France                                                                                                       | Chow, Joshua<br>Assistant Manager; Member of Green Campus Committee<br>Universiti Tunku Abdul Rahman Sungai Long Campus<br>Malaysia                                                        | Chow, Robert<br>Professor of Physiology & Biophysics<br>Univ. of Southern California, Keck School of Medicine<br>United States of America (the)     |

|                                                                                                                   |                                                                                                                                              |                                                                                                                                                                              |
|-------------------------------------------------------------------------------------------------------------------|----------------------------------------------------------------------------------------------------------------------------------------------|------------------------------------------------------------------------------------------------------------------------------------------------------------------------------|
| Chow, Savanna<br>PH.D student<br>Biodiversity Research Center, Academia Sinica<br>Taiwan                          | Choy, Satish<br>Aquatic Ecologist<br>Australia                                                                                               | Chozas, Sergio<br>Post-Doc Researcher<br>Centre for Ecology, Evolution and Environmental Changes (cE3c)<br>Portugal                                                          |
| Christe, Camille<br>Research assistant<br>Conservatoire et Jardin botaniques de la Ville de Genève<br>Switzerland | Christe, Philippe<br>Professor, Ecology and Evolution<br>University of Lausanne<br>Switzerland                                               | Christensen, Thomas<br>Civil Servant / Biodiversity conservation<br>Instituto Chico Mendes de Conservação da Biodiversidade - ICMBio / Ministério do Meio Ambiente<br>Brazil |
| Christensen, Villy<br>Professor<br>University of British Columbia<br>Canada                                       | Christi, Katy<br>Laboratory technician Biomedicine<br>James Cook University Townsville<br>Australia                                          | Christian, Golcher Benavides<br>Hydrology and Geography<br>Universidad Nacional de Costa Rica<br>Costa Rica                                                                  |
| Christianini, Alexander<br>Professor of Ecology<br>Universidade Federal de São Carlos<br>Brazil                   | Christiansen, Bernd<br>Senior scientist marine ecology<br>Universität hamburg<br>Germany                                                     | Christiansen, Thomas A<br>Retired Otolaryngologist<br>University of Minnesota<br>United States of America (the)                                                              |
| Christianson, David<br>Assistant Professor<br>University of Arizona<br>United States of America (the)             | Christie, Duncan A.<br>Associate Professor<br>Instituto de Conservación Biodiversidad y Territorio,<br>Universidad Austral de Chile<br>Chile | Christy, Michelle<br>Researcher<br>Centre for Invasive Species Solutions<br>Australia                                                                                        |
| Chu, Nan-Chin<br>International Affairs<br>Ifremer<br>France                                                       | Chuang, Yaoyang<br>Taiwan                                                                                                                    | Chucholl, Chris<br>Research Scientist (PhD) - Ecologist<br>Eco Surv<br>Germany                                                                                               |
| CHUNG, Boon Kuan<br>Professor<br>University Tunku Abdul Rahman<br>Malaysia                                        | Church, Brigitte<br>Ecologist<br>Ezemvelo KZN Wildlife<br>South Africa                                                                       | Chylarecki, Przemyslaw<br>Associate Professor, Ecology<br>Museum & Institute of Zoology, Polish Academy of Sciences<br>Poland                                                |
| Ciafre, Claire<br>Field Botany<br>Austin Peay State University<br>United States of America (the)                  | Ciais, Philippe<br>carbon cycle studies<br>LSCE<br>France                                                                                    | Cianciaruso, Marcus<br>Associate Professor in Ecology and Evolution<br>Universidade Federal de Goiás<br>Brazil                                                               |



|                                                                                                                                      |                                                                                                         |                                                                                                                                                                |
|--------------------------------------------------------------------------------------------------------------------------------------|---------------------------------------------------------------------------------------------------------|----------------------------------------------------------------------------------------------------------------------------------------------------------------|
| Cianferoni, Fabio<br>Entomology<br>Natural History Museum of the University of Florence<br>Italy                                     | Cibois, Alice<br>Research officer, ornithology<br>Natural History Museum of Geneva<br>Switzerland       | Ciborowski, Jan<br>Professor, Biological Sciences<br>University of Windsor<br>Canada                                                                           |
| Ciccolini, Valentina<br>post-doc fellow<br>Scuola Superiore Sant'Anna<br>Italy                                                       | Cicerello, Ronald<br>aquatic biodiversity conservation<br>Kentucky<br>United States of America (the)    | Cicero, Carla<br>Staff Curator of Birds<br>Museum of Vertebrate Zoology, University of California,<br>Berkeley<br>United States of America (the)               |
| Cid Yanez, Fabian<br>PhD Student in Sustainability<br>UBC<br>Canada                                                                  | Ciegler, Janet<br>Entomology<br>United States of America (the)                                          | Cieraad, Ellen<br>Lecturer & Researcher in Ecology & Sustainable<br>Development<br>Institute of Environmental Sciences, Leiden University<br>Netherlands (the) |
| Cilli, Eduardo *<br>Professor/Biochemistry<br>Institute of Chemistry - UNESP<br>Brazil                                               | Cilliers, Dirk<br>Senior Lecturer<br>North-West University<br>South Africa                              | Cinel, Scott<br>Ph.D. Student<br>University of Florida<br>United States of America (the)                                                                       |
| Cinelli, Matteo<br>Ph.D. Student<br>University of Rome "Tor Vergata"<br>Italy                                                        | Cintra, Renato<br>Researcher<br>INPA<br>Brazil                                                          | Ciotti, Benjamin<br>Lecturer in Marine Biology<br>University of Plymouth<br>United Kingdom of Great Britain and Northern Ireland<br>(the)                      |
| Cipriano. Marques, Paulo<br>Portugal                                                                                                 | Cires, Samuel<br>Postdoctoral Research fellow in Microbiology<br>University Autonoma de Madrid<br>Spain | Cirkulan, Simon<br>Professor of Biology and Chemistry<br>Biopark Lipovec / Biodiversium, nature conservation<br>society<br>Slovenia                            |
| CIRUJANO, SANTOS *<br>CHIEF DEPARTMENT BIODIVERSITY AND CONSERVATION<br>CSIC (Consejo Superior Investigaciones Científicas)<br>Spain | Cīrulis, Aivars<br>PhD student in Evolutionary Biology<br>Lund University<br>Sweden                     | Cisalpino, Daniel<br>PhD. In Microbiology<br>Independent<br>Brazil                                                                                             |
| Cisneros, Elías<br>Research Associate<br>University of Bonn, Insitute for Food and Resource<br>Economics<br>Germany                  | Cisneros-Heredia, Diego<br>Professor<br>Universidad San Francisco de Quito USFQ<br>Ecuador              | Civeyrel, Laure<br>Associate Professor<br>UPS, University of Toulouse<br>France                                                                                |

|                                                                                                                                                                    |                                                                                                                                 |                                                                                                                                                     |
|--------------------------------------------------------------------------------------------------------------------------------------------------------------------|---------------------------------------------------------------------------------------------------------------------------------|-----------------------------------------------------------------------------------------------------------------------------------------------------|
| Claes, Raf<br>Belgium                                                                                                                                              | Claessen, David<br>Associate professor<br>Ecole Normale Superieure<br>France                                                    | Claessens, Jean<br>Honorary Staff Member<br>Naturalis Biodiversity Center<br>Netherlands (the)                                                      |
| Clair, Bruno<br>Directeur de recherche - Plant biomechanics<br>CNRS<br>French Guiana                                                                               | Clair, Guillaume<br>Researcher / Water and sanitation<br>Eawag<br>France                                                        | Clair, Rebecca<br>Student<br>Oregon State University<br>United States of America (the)                                                              |
| Claireau, Fabien<br>PhD Student<br>National Museum of Natural History of Paris<br>France                                                                           | Claireaux, Guy<br>Professor / Marine Biology and Physiology<br>France                                                           | Clara, Mario<br>Director of Centro Unviersitrio de Rivera<br>Universidad de la República<br>Uruguay                                                 |
| Claridge, Peter<br>Retired marine scientist and former Chief Executive<br>Plymouth Marine Laboratory<br>United Kingdom of Great Britain and Northern Ireland (the) | Clark, Andrew<br>Ecologist and Filmmaker<br>United Kingdom of Great Britain and Northern Ireland (the)                          | Clark, Cameron<br>Applied Geologist<br>Camborne School of Mines, University of Exeter<br>United Kingdom of Great Britain and Northern Ireland (the) |
| Clark, Daniel<br>Ecology<br>United States of America (the)                                                                                                         | Clark, Deborah A.<br>Tropical forests and climate change<br>University of Missouri, St. Louis<br>United States of America (the) | Clark, Deirdre<br>PhD Research Fellow, Geochemistry<br>University of Iceland<br>Iceland                                                             |
| Clark, Denis<br>Consulting Engineer<br>United States of America (the)                                                                                              | Clark, Gary<br>Associate Lecturer in Soil Science<br>La Trobe University<br>Australia                                           | Clark, Jorie<br>Courtesy Assistant Professor<br>Oregon State University<br>United States of America (the)                                           |
| Clark, Kathryn<br>Postdoc / geography<br>University of Calgary<br>Canada                                                                                           | Clark, Malcolm *<br>Emeritus Member<br>American Chemical Society<br>Canada                                                      | Clark, Meaghan<br>Graduate student in Evolutionary Biology<br>California State University, Northridge<br>United States of America (the)             |
| Clark, Peter<br>Distinguished Professor of Earth, Ocean, and<br>Atmospheric Sciences<br>Oregon State University<br>United States of America (the)                  | Clark, Sarah<br>Biochemistry<br>Oregon State University<br>United States of America (the)                                       | Clarke, David<br>Ecology<br>Australia                                                                                                               |
| Clarke, Ken<br>Postdoctoral Researcher, landscape ecology and remote<br>sensing<br>University of Adeladie<br>Australia                                             | Clarke, Mairi<br>Technical Officer Structural biology<br>EMBL<br>Germany                                                        | Clarke, Raymond<br>Professor Emeritus/Ecology<br>Sarah Lawrence College<br>United States of America (the)                                           |

|                                                                                                                           |                                                                                                                                                             |                                                                                                                                               |
|---------------------------------------------------------------------------------------------------------------------------|-------------------------------------------------------------------------------------------------------------------------------------------------------------|-----------------------------------------------------------------------------------------------------------------------------------------------|
| Clarkson, Bruno<br>Post-doc researcher in Entomology<br>Universidade Federal do Paraná - UFPR, Curitiba, Brazil<br>Brazil | Clary, Michael<br>Biologist<br>United States of America (the)                                                                                               | Claß-Mahler, Ingrid<br>Agricultural scientist<br>Germany                                                                                      |
| Claude, Julien<br>Assistant Professor<br>ISE-M, Université de Montpellier, CNRS, IRD, EPHE<br>France                      | Clause, Adam G.<br>Ph.D. Candidate, Integrative Conservation & Forestry and<br>Natural Resources<br>University of Georgia<br>United States of America (the) | Clausen, Lucy<br>Conservation Ecologist<br>Australia                                                                                          |
| Claushuis, Job<br>Phytoextraction of toxic metals<br>Wageningen University & Research<br>Netherlands (the)                | Claussen, Julie<br>Fisheries Biologist<br>Fisheries Conservation Foundation<br>United States of America (the)                                               | Clavijo, Laura<br>PhD, Independent researcher<br>Colombia                                                                                     |
| Clavijo Romero, María Angélica *<br>Researcher<br>Universidad de La Sabana<br>Colombia                                    | Clay, Tommy<br>Postdoctoral Researcher<br>British Antarctic Survey<br>United Kingdom of Great Britain and Northern Ireland<br>(the)                         | Clay, Zanna<br>Assistant Professor<br>Durham University<br>United Kingdom of Great Britain and Northern Ireland<br>(the)                      |
| Clegg, Mariah<br>Graduate Student, Sociology<br>University of California, Santa Barbara<br>United States of America (the) | Cleghorn, Christine<br>Nutrition Research Fellow<br>University of Otago<br>New Zealand                                                                      | Clemen, Thomas<br>Professor of Computer Science<br>Hamburg University of Applied Sciences<br>Germany                                          |
| Clemens, Robert<br>Australia                                                                                              | Clement, Charles<br>Senior Scientist, Technology and Innovation Department<br>Instituto Nacional de Pesquisas da Amazônia<br>Brazil                         | Clement, Luke<br>Schools Liaison Officer - Technocamps<br>Swansea University<br>United Kingdom of Great Britain and Northern Ireland<br>(the) |
| Clements, Gopaldasamy Reuben<br>Co-founder<br>Rimba<br>Malaysia                                                           | Clements, Hayley<br>Research Fellow Conservation Biology<br>Monash University<br>Australia                                                                  | Clements, Jeff<br>NSERC Visiting Postdoctoral Fellow, Marine ecology<br>Fisheries and Oceans Canada<br>Canada                                 |
| Clements, Peter<br>Visiting Research Fellow<br>University of Adelaide<br>Australia                                        | Clements, Stephanie<br>PhD student in Biology<br>University of Miami<br>United States of America (the)                                                      | Clerc, Philippe<br>Biologist<br>Conservatoire et Jardin botaniques de la Ville de Genève<br>Switzerland                                       |

|                                                                                                                                                   |                                                                                                                                                              |                                                                                                                                                                            |
|---------------------------------------------------------------------------------------------------------------------------------------------------|--------------------------------------------------------------------------------------------------------------------------------------------------------------|----------------------------------------------------------------------------------------------------------------------------------------------------------------------------|
| Clerici, Nicola<br>Associate Professor<br>Universidad del Rosario<br>Colombia                                                                     | Cleveland, David<br>Research Professor, Environmental Studies Pgm & Dept<br>of Geography<br>U of California, Santa Barbara<br>United States of America (the) | Cleverly, James<br>Environmental Scientist<br>University of Technology Sydney<br>Australia                                                                                 |
| Cliburn, Elizabeth<br>Biology Student<br>Sam Houston State University<br>United States of America (the)                                           | Clinton, Richard<br>Professor Emeritus of Political Science<br>Oregon State University<br>United States of America (the)                                     | clobert, jean<br>Resedirector of exceptional class and member of<br>Academia Europaea, ecologist<br>CNRS<br>France                                                         |
| Clothier, Brent<br>Science Group Leader, Production Footprints<br>Plant & Food Research<br>New Zealand                                            | Clough, Adrian<br>Grad student in mathematics<br>University of Texas at Austin<br>United States of America (the)                                             | Clusa, Marcel<br>Spain                                                                                                                                                     |
| Clymo, Dicky<br>Emeritus Professor of Ecology<br>Queen Mary University of London<br>United Kingdom of Great Britain and Northern Ireland<br>(the) | Coad, Lauren<br>Conservation scientist<br>University of Sussex<br>United Kingdom of Great Britain and Northern Ireland<br>(the)                              | Cobben, Marleen<br>Postdoctoral Researcher in Ecology & Evolution<br>University of Wuerzburg<br>Germany                                                                    |
| Cobos, Anthony<br>United States of America (the)                                                                                                  | Cobra, Priscilla<br>Ecology / Environment<br>Universidade do Estado do Rio de Janeiro - UERJ<br>Brazil                                                       | COBURN PHILLIPS, NICK<br>Independent Marine Scientist & Fine Art Photographer<br>Borneo Sharkarma now N/A<br>United Kingdom of Great Britain and Northern Ireland<br>(the) |
| Cochard, Arnaud<br>PhD Student<br>INRA<br>France                                                                                                  | Cochran-Biederman, Jennifer<br>Assistant Professor of Biology<br>Winona State University<br>United States of America (the)                                   | cochrane, kerry<br>Human Ecology<br>Australian Institute of Ecological Agriculture<br>Australia                                                                            |
| Cockcroft, Vic<br>Director Centre for Dolphin Studies / Dugongs Western<br>Indian Ocean<br>Nelson Mandela Metropolitan Univerity<br>South Africa  | Cockerill, Tim<br>Senior Lecturer in Natural History<br>University of South Wales<br>United Kingdom of Great Britain and Northern Ireland<br>(the)           | Cockle, Kristina<br>Research Scientist<br>National Research Council of Argentina<br>Argentina                                                                              |
| Codron, Daryl<br>Specialist Museum Scientist, Ecology<br>National Museum<br>South Africa                                                          | Codron, Francis<br>Professor, Oceanography<br>France                                                                                                         | Coe, Damion<br>Natural Resource Ecologist<br>City of Portland - Oregon<br>United States of America (the)                                                                   |

|                                                                                                                                |                                                                                                                  |                                                                                                                       |
|--------------------------------------------------------------------------------------------------------------------------------|------------------------------------------------------------------------------------------------------------------|-----------------------------------------------------------------------------------------------------------------------|
| Coe, Margaret<br>Senior Research Technician<br>Liggins Institute, University of Auckland<br>New Zealand                        | Coelho, Luci Boa Nova<br>Researcher entomologist<br>Universidade Federal do Rio de Janeiro<br>Brazil             | Coelho, Luiz de Souza<br>Biologist / Biotechnologist<br>National Institute of Research of the Amazon - INPA<br>Brazil |
| Coelho, Paula<br>Professor in Astronomy<br>Universidade de São Paulo<br>Brazil                                                 | Coelho, Paula N.<br>Zoology/Limnology<br>Universidade Estadual Paulista (UNESP)<br>Brazil                        | Coetsee, Amy<br>Threatened Species Project Officer<br>Zoos Victoria<br>Australia                                      |
| Coetzee, Bernard<br>Research Associate/ Lecturer in Conservation Science<br>Organizaition for Tropical Studies<br>South Africa | Coetzee, Julie<br>Associate Professor of Botany<br>RHodes University<br>South Africa                             | Coeurdassier, Michael<br>Lecturer in ecotoxicology<br>Dpt Chrono-Environment - University of Franche-Comté<br>France  |
| Cofershabica, Stephen<br>Oceanographer<br>Oregon State University<br>United States of America (the)                            | Coffman, James<br>Associate Professor of Biology<br>MDI Biological Laboroatory<br>United States of America (the) | Coffroth, Mary Alice<br>Research Faculty<br>University at Buffalo<br>United States of America (the)                   |
| Cohen, Maurie<br>Professor of Sustainability Studies<br>New Jersey Institute of Technology<br>United States of America (the)   | Coimbra, Zulmira Helena<br>Ecology<br>Federal University of Rio de Janeiro<br>Portugal                           | Coimbra, Zulmira Helena<br>Ecology<br>Federal University of Rio de Janeiro<br>Brazil                                  |
| çokbankir, özge<br>Turkey                                                                                                      | Cokendolpher, James<br>retired- Research Scientist<br>Texas Tech University<br>United States of America (the)    | Cole, Charles<br>Ecologist<br>Penn State University<br>United States of America (the)                                 |
| Cole, Dr Mary<br>Soil microbiologist and plant pathologist<br>Agpath P/L; Univ of Melbourne<br>Australia                       | Cole, Gemma<br>Associate Research Fellow<br>Deakin University<br>Australia                                       | Cole, Liz<br>Senior Research Assistant<br>Oregon State University<br>United States of America (the)                   |
| Cole, Rebecca<br>Research Scientist Parasitologist<br>United States of America (the)                                           | Cole, Sam<br>Professor Emeritus<br>University at Buffalo<br>Aruba                                                | Colefax, Andrew<br>PhD Candidate, Marine Science<br>Southern Cross University<br>Australia                            |
| Coleman, Dr. Jonathan<br>Biologist<br>Australia                                                                                | Coleman, Joanna<br>Lecturer, Environmental Studies<br>National University of Singapore<br>Singapore              | Coleman, Richard<br>Phd Candidate<br>Hawaii Institute of Marine Biology<br>United States of America (the)             |

|                                                                                                                       |                                                                                                                                 |                                                                                                                                          |
|-----------------------------------------------------------------------------------------------------------------------|---------------------------------------------------------------------------------------------------------------------------------|------------------------------------------------------------------------------------------------------------------------------------------|
| Coles, Zane<br>M.Sc Environmental Horticulture<br>The University of Pretoria<br>South Africa                          | Coley, Kitty<br>Geologist<br>Self employed<br>United States of America (the)                                                    | Coley, Phyllis<br>Distinguished Professor<br>University of Utah<br>United States of America (the)                                        |
| Colgan, William<br>Senior Researcher, Glaciology and Climate<br>Geological Survey of Denmark and Greenland<br>Denmark | Colinas, Carlos<br>Forest Pathology professor<br>University of Lleida<br>Spain                                                  | Colinet, Dominique<br>France                                                                                                             |
| Colinet, Hervé *<br>Permanent CNRS researcher<br>CNRS<br>France                                                       | Colino Rabanal, Victor J<br>Researcher in Environmental Science<br>University of Salamanca<br>Spain                             | Coll, Marta<br>Resercher<br>Institute of Marine Science - Spanish Council of Research<br>Spain                                           |
| Colla, Sheila<br>Assistant Professor<br>York university<br>Canada                                                     | Collado-Vides, Julio<br>Professor in Computational Genomics<br>UNAM<br>Mexico                                                   | Collado-Vides, Ligia<br>Senior Lecturer Biology<br>Florida International University<br>United States of America (the)                    |
| Collalti, Alessio<br>Scientist<br>EuroMediterranean Center on climate change<br>Italy                                 | Collares-Pereira, Manuel<br>Professor, Renewable Energies cahir<br>Portugal                                                     | Colleony, Agathe<br>Postdoctoral Fellow in Conservation Psychology<br>Technion - Israel Institute of Technology<br>Israel                |
| coller, xavier<br>full professor, Sociology<br>universidad pablo de olavide<br>Spain                                  | Collett, Leah<br>PhD student; Climate, Ecology and Evolutionary Dynamics<br>Lab<br>University of Adelaide<br>Australia          | Colley, Kathryn<br>Environmental Psychologist<br>James Hutton Institute<br>United Kingdom of Great Britain and Northern Ireland<br>(the) |
| Collingwood, Teghan<br>Honours Student, Environmental Management<br>University of Queensland<br>Australia             | Collins, Meghan<br>Assistant Research Scientist - STEM Education<br>Desert Research Institute<br>United States of America (the) | Collins, Michael *<br>Professor of Molecular Pharmacology<br>Loyola University Chicago<br>United States of America (the)                 |
| Collins, Timothy<br>Researcher<br>Wildlife Conservation Society<br>Kenya                                              | Collins, Yolanda<br>Environmental Sciences and Policy, PhD<br>Central European University<br>Guyana                             | Collosi, Emma<br>Evolutionary Biologist<br>United States of America (the)                                                                |
| Collova, Jemma<br>PhD candidate<br>University of Western Australia<br>Australia                                       | Colman, Liliana<br>United Kingdom of Great Britain and Northern Ireland<br>(the)                                                | Colmenares, Fernando<br>Professor of Psychobiology and Evolutionary Biology<br>Universidad Complutense de Madrid<br>Spain                |

|                                                                                                                                                                |                                                                                                             |                                                                                                                              |
|----------------------------------------------------------------------------------------------------------------------------------------------------------------|-------------------------------------------------------------------------------------------------------------|------------------------------------------------------------------------------------------------------------------------------|
| Colombo, Valentina<br>CSIRO<br>Australia                                                                                                                       | Colosi, Joseph<br>Associate professor of biology<br>DeSales University<br>United States of America (the)    | colucci, joseph<br>Retired Executive Director<br>General Motors R&D<br>United States of America (the)                        |
| Colwell, Frederick<br>Professor<br>Oregon State University<br>United States of America (the)                                                                   | Colwell, Mark<br>Professor, Wildlife<br>Humboldt State University<br>United States of America (the)         | Comar, Vito<br>University Teacher and Researcher<br>Federal University of the Greater Dourados Region-UFGD<br>Brazil         |
| Comay, Orr<br>Postdoctoral fellow, ecology<br>Tel Aviv University<br>Israel                                                                                    | Combosch, David<br>Professor for Population Genetics<br>University of Guam<br>Guam                          | Comeau, André<br>Director<br>BIONOR SYSTÉMIQ INC.<br>Canada                                                                  |
| Comeau, André<br>Research director<br>Bionor Systemiq Inc.<br>Canada                                                                                           | Comer, Sarah<br>Ecologist, PhD Student<br>University of Western Australia<br>Australia                      | Comiskey, James *<br>Ecologist<br>United States of America (the)                                                             |
| Comiti, Francesco<br>Associate Professor, Forest Hydrology and Fluvial<br>Geomorphology<br>Free University of Bozen-Bolzano<br>Italy                           | Compte, Jordi<br>Postdoc investigator<br>Insititut of Aquatic Ecology (University of Girona)<br>Spain       | Comte, Adrien<br>PhD student<br>Institut Universitaire Européen de la Mer<br>France                                          |
| Comte, Sebastien<br>PhD candidate in Biological Sciences<br>University of Tasmania<br>Australia                                                                | conand, chantal<br>Emeritus professor<br>La Reunion university<br>France                                    | Conceicao, Aline<br>Professor<br>Universidade Estadual de Santa Cruz<br>Brazil                                               |
| Concepción Cuevas, Elena D.<br>Postdoctoral researcher<br>National Museum of Natural Sciences. Spanish National<br>Research Council (MNCN-CSIC)<br>Spain       | Conchou, Lucie<br>Postdoctoral fellow in Ecology<br>Institut National de la Recherche Agronomique<br>France | Conciani, Dhemerson<br>Ecology<br>Universidade Estadual Paulista (UNESP)<br>Brazil                                           |
| Condamine, Fabien L.<br>Research scientist in Evolutionary Biology and Ecology<br>CNRS, Institut des Sciences de l'Evolution - Montpellier<br>(ISEM)<br>France | Condez, Thais<br>Post-doctoral<br>Universidade Estadual Paulista (UNESP) - Rio Claro<br>Brazil              | Conenna, Irene<br>PhD student<br>University of Helsinki<br>Finland                                                           |
| Coners, Heinz<br>Biology<br>University Goettingen<br>Germany                                                                                                   | Coninx, Laura<br>PhD student<br>Hasselt University<br>Belgium                                               | Conith, Andrew<br>Post doc in evolutionary biology<br>University of Massachusetts, Amherst<br>United States of America (the) |

|                                                                                                                                                       |                                                                                                                              |                                                                                                                                                       |
|-------------------------------------------------------------------------------------------------------------------------------------------------------|------------------------------------------------------------------------------------------------------------------------------|-------------------------------------------------------------------------------------------------------------------------------------------------------|
| Conith, Moira<br>PhD Candidate, Organismic and Evolutionary Biology<br>University of Massachusetts Amherst<br>United States of America (the)          | Conklin, Jesse<br>Ecologist<br>University of Groningen<br>Netherlands (the)                                                  | Conklin, Paul<br>agroecology and environmental science<br>Northern Light Farm<br>United States of America (the)                                       |
| Conlisk, Erin<br>Quantitative Ecologist<br>Point Blue Conservation Science<br>United States of America (the)                                          | Connan, Maelle<br>Research Fellow<br>Nelson Mandela University<br>South Africa                                               | Connon, Richard<br>Associate Professor<br>University of California, Davis<br>United States of America (the)                                           |
| Connor, Michael<br>Conservation<br>United States of America (the)                                                                                     | Conradi, Timo<br>Postdoctoral Researcher<br>Department of Bioscience, Aarhus University<br>Denmark                           | Consorte-McCrea, Adriana<br>Conservation Biology<br>Canterbury Christ Church University<br>United Kingdom of Great Britain and Northern Ireland (the) |
| Constable, Lee<br>Australia                                                                                                                           | Contador, Tamara<br>PhD, Biology. Freshwater ecology and environmental ethics.<br>Universidad de Magallanes<br>Chile         | Contador-Kelsall, Isabella<br>Biological Sciences<br>University of Wollongong<br>Australia                                                            |
| Conti, Michele<br>Information Services Manager - Biodiversity<br>European Commission<br>Italy                                                         | Contini, Erika<br>Psychologist (Clinical Neuropsychology Registrar)<br>Australia                                             | Contrera, Felipe<br>Associate Professor<br>Instituto de Ciências Biológicas, Universidade Federal do Pará<br>Brazil                                   |
| CONTRERAS, ARACELI *<br>FULL TIME PROFESSOR<br>INSTITUTO POLITECNICO NACIONAL<br>Mexico                                                               | Contreras, José Miguel<br>Entomologist<br>Ong Grupo Salvaje<br>Chile                                                         | Contreras Fleury, Mario<br>Undergraduate in Earth Sciences<br>Universidad Nacional Autónoma de México<br>Mexico                                       |
| Convey, Peter<br>Professor, NERC Individual Merit Scientist<br>British Antarctic Survey<br>United Kingdom of Great Britain and Northern Ireland (the) | Conzelman, Karen<br>Biology Department Chair<br>Glendale Community College, AZ<br>United States of America (the)             | Cook, Freeman<br>Honorary Professor Environmental Physics<br>The University of Queensland<br>Australia                                                |
| Cook, Joseph<br>Profesor of Biology<br>University of New Mexico<br>United States of America (the)                                                     | Cook, Timothée<br>Research Associate<br>FitzPatrick Insitute of African Ornithology, University of Cape Town<br>South Africa | Cooke, Robert<br>PhD Candidate<br>University of Southampton<br>United Kingdom of Great Britain and Northern Ireland (the)                             |



|                                                                                                                                                            |                                                                                                                                          |                                                                                                                                                                      |
|------------------------------------------------------------------------------------------------------------------------------------------------------------|------------------------------------------------------------------------------------------------------------------------------------------|----------------------------------------------------------------------------------------------------------------------------------------------------------------------|
| Cooke, Siobhan<br>Assistant Professor of Functional Anatomy and Evolution<br>Johns Hopkins University School of Medicine<br>United States of America (the) | Cooley, Daniel<br>Professor of Plant Pathology<br>University of Massachusetts Amherst<br>United States of America (the)                  | Cooling, Kristofor<br>Honours ecologist<br>Australian Coastal and Marine Ecology<br>Australia                                                                        |
| Coombs, Gary<br>Associate Professor of Cell & Molecular Biology<br>Waldorf University<br>United States of America (the)                                    | Coomes, Jenny<br>PhD Student in Bioscience<br>UCC<br>Ireland                                                                             | Cooper, Jacob C.<br>Graduate Student<br>The University of Chicago & The Field Museum<br>United States of America (the)                                               |
| Cooper, Matthew<br>PhD Student in Geography<br>University of Maryland<br>United States of America (the)                                                    | Cooper, Sam<br>PhD student, Remote Sensing<br>Geography Department, Humboldt Universität zu Berlin<br>Germany                            | Cooper, Tristan<br>Retired. MSc<br>United Kingdom of Great Britain and Northern Ireland<br>(the)                                                                     |
| Copete Carreño, Miguel Ángel<br>Professor<br>Universidad de Castilla-La Mancha<br>Spain                                                                    | Coppell, Kirsten<br>Public Health Physician and Senior Research Fellow<br>University of Otago<br>New Zealand                             | Coppock, Rachel<br>PhD Researcher, Biosciences<br>Plymouth Marine Laboratory & University of Exeter<br>United Kingdom of Great Britain and Northern Ireland<br>(the) |
| Copsey, Janice *<br>Botanist<br>Wye College<br>United Kingdom of Great Britain and Northern Ireland<br>(the)                                               | Coquillard, Patrick<br>Associate professor Vegetation sciences and ecological<br>modelling<br>Université de Nice<br>France               | Coradin, Lidio *<br>Consultant<br>Ministry of the Environment<br>Brazil                                                                                              |
| Corazza, Rosana<br>Associate Professor; Science and Technology Policy,<br>Economics and Geography<br>State University of Campinas<br>Brazil                | Corbet, Sarah<br>retired university lecturer<br>University of Cambridge<br>United Kingdom of Great Britain and Northern Ireland<br>(the) | Corbin, Amie<br>PhD Researcher<br>Leiden University<br>Netherlands (the)                                                                                             |
| Corbin, Jeffrey<br>Professor, Biological Sciences<br>Union College<br>United States of America (the)                                                       | Corcoran, Aaron<br>Research Assistant Professor<br>Wake Forest University<br>United States of America (the)                              | Cordeiro, Isabelle<br>Doutoranda<br>Universidade Federal Rural do Rio de Janeiro<br>Brazil                                                                           |
| Cordeiro, Norbert<br>Associate Prof. Ecology & Conservation<br>Roosevelt University & The Field Museum<br>United States of America (the)                   | Cordero, Pedro J<br>Ecology and biodiversity<br>University of Castilla-La Mancha<br>Spain                                                | Córdoba-Aguilar, Alex<br>Researcher<br>Universidad Nacional Autónoma de México<br>Mexico                                                                             |

|                                                                                                                                                                  |                                                                                                                                                                                          |                                                                                                                      |
|------------------------------------------------------------------------------------------------------------------------------------------------------------------|------------------------------------------------------------------------------------------------------------------------------------------------------------------------------------------|----------------------------------------------------------------------------------------------------------------------|
| Cordoba-Cordoba, Sergio<br>Researcher-Ornithology/EvolutionaryBiology<br>Instituto de Investigacion de Recursos Biologicos<br>Alexander von Humboldt<br>Colombia | Cordonnier, Marion<br>PhD Student<br>Université Claude Bernard Lyon 1<br>France                                                                                                          | Cords, Marina<br>Ecology, Evolution & Environmental Biology<br>Columbia University<br>United States of America (the) |
| Corewyn, Lisa<br>Assistant Professor, Biological Anthropology<br>Ithaca College<br>United States of America (the)                                                | Coristine, Laura Elizabeth<br>Liber Ero Postdoctoral Fellow<br>University of British Columbia Okanagan<br>Canada                                                                         | Corlett, Richard<br>Professor<br>Xishuangbanna Tropical Botanical Garden, Chinese<br>Academy of Sciences<br>China    |
| Cormon, Xochitl<br>Postdoctoral researcher in Ecology<br>Hamburg University<br>France                                                                            | Cornejo-Donoso, Jorge<br>Postdoctoral researcher, marine science<br>National Center for Ecological Analysis and Synthesis<br>United States of America (the)                              | Cornejo-Latorre, Cristian<br>Biologist<br>CIBNOR<br>Mexico                                                           |
| Cornelissen, Johannes H C<br>Full Professor of Ecology<br>Vrije Universiteit Amsterdam<br>Netherlands (the)                                                      | Cornelius, Cintia<br>Associate Professor<br>Federal University of Amazonas<br>Brazil                                                                                                     | Cornet, Yannick<br>Sustainable transport appraisal<br>Technical University of Denmark<br>Denmark                     |
| Cornic, Gabriel<br>Honorary Professor<br>Université Paris-Saclay, Faculté des sciences d'Orsay<br>France                                                         | Coron, Camille<br>Assistant professor<br>Paris-Sud University<br>France                                                                                                                  | Coronado, Manuel<br>Research, Transport in porous media<br>Instituto Mexicano del Petroleo<br>Mexico                 |
| Coronado-Álvarez, Luz de Lourdes Aurora *<br>Marine Ecology<br>CICESE<br>Mexico                                                                                  | corporaal, els<br>ecology<br>manicupality<br>Netherlands (the)                                                                                                                           | Corradini, Andrea<br>Wildlife Biologist<br>University of Florence<br>Italy                                           |
| Corrado, Amanda<br>PHD Student<br>UNESP<br>Brazil                                                                                                                | Corrales, Xavier<br>PhD<br>Institute of Marine Science (ICM-CSIC)<br>Spain                                                                                                               | Correa, Cristian<br>PhD Evolutionary Ecology<br>Universidad Austral de Chile<br>Chile                                |
| Correa, Decio<br>PhD candidate<br>The University of Texas at Austin<br>Brazil                                                                                    | Correa, Diego F.<br>PhD candidate<br>School of Agriculture and Food Sciences, The University<br>of Queensland. ARC Centre of Excellence for<br>Environmental Decisions CEED<br>Australia | CORREA, IVAN<br>GEOLOGIST<br>CONSULTANT<br>Colombia                                                                  |
| Correa, Letícia *<br>Phd Archaeologist<br>Museu de Arqueologia e Etnologia (MAE/USP)<br>Brazil                                                                   | Correa, Letícia Cristina *<br>Phd Archaeologist<br>Museu de Arqueologia e Etnologia (MAE/USP)<br>Brazil                                                                                  | Corrêa Côrtes, Marina<br>Assistant professor, Ecology<br>Universidade Estadual Paulista (UNESP), Rio Claro<br>Brazil |

|                                                                                                               |                                                                                                                                                                  |                                                                                                                          |
|---------------------------------------------------------------------------------------------------------------|------------------------------------------------------------------------------------------------------------------------------------------------------------------|--------------------------------------------------------------------------------------------------------------------------|
| Corrêa da Silva, Edson<br>Full Professor<br>Universidade Estadual do Norte Fluminense Darcy Ribeiro<br>Brazil | Correa Garcia, Sara<br>phD candidate<br>INRS<br>Canada                                                                                                           | Correa Scalon, Marina<br>PhD<br>Universidade do Estado de Mato Grosso<br>Brazil                                          |
| Correa-Baena, Juan-Pablo<br>Postdoctoral Fellow<br>MIT<br>United States of America (the)                      | Correia, Marie<br>Lecturer<br>Maastricht University (Netherlands) and University of<br>Guyana<br>Guyana                                                          | Correia, Marta<br>PhD student, Plant Ecology<br>Centre for Functional Ecology, CFE<br>Portugal                           |
| Correia, Ricardo<br>Post-doctoral researcher<br>University of Aveiro<br>Portugal                              | Correia Fróes, Livia<br>Student of Environmental management<br>Universidade Federal Rural do Rio de Janeiro<br>Brazil                                            | Corriero, Giuseppe<br>Full Professor of Zoology and Director of the Biology<br>Department<br>University of Bari<br>Italy |
| Corrigan, Colleen<br>School of Earth and Environmental Sciences<br>University of Queensland<br>Australia      | Cortes, Alejandra<br>Conservation Biologist<br>University of Nevada Las Vegas<br>United States of America (the)                                                  | Cortes, Nelson<br>Postdoctoral researcher<br>University of Montreal<br>Canada                                            |
| cortes, pablo<br>Chile                                                                                        | Cortes, Rocio<br>Associate Professor<br>University of Wisconsin Oshkosh<br>United States of America (the)                                                        | Cortés, Jorge<br>Researcher and Professor<br>University of Costa Rica<br>Costa Rica                                      |
| Cortés-Avizanda, Ainara<br>PostDoc<br>Estación Biológica de Doñana, CSIC<br>Spain                             | Cortés-Flores, José Isabel<br>Profesor Investigador Titular/ Soil Science<br>Colegio de Postgraduados, campus Montecillo, Texcoco,<br>Estado de México<br>Mexico | Cortés-Gómez, Adriana A.<br>PhD<br>Mexico                                                                                |
| Cortesi, Fabio<br>Postdoctoral Research Fellow<br>University of Queensland<br>Australia                       | Cortet, Jérôme<br>Professor, Ecology<br>Université Paul-Valéry, Montpellier<br>France                                                                            | Cortez, Diego<br>PhD. Assistant Professor<br>Center for Genomic Sciences, UNAM.<br>Mexico                                |
| Corti, Paulo *<br>Professor in Animal Ecology/Conservation Biology<br>Universidad Austral de Chile<br>Chile   | Cortines, Erika<br>Watershed management and restoration ecology<br>Universidade Federal Rural do rio de Janeiro<br>Brazil                                        | Corvalan, Carlos<br>Adjunct Professor<br>University of Canberra<br>Australia                                             |
| Corvalan, Paloma<br>Ecology<br>University of Queensland<br>Australia                                          | Corzo, Alfonso<br>Full Professor of Ecology<br>University of Cádiz<br>Spain                                                                                      | Corzo Mora, German Arturo<br>Investigador Principal/Biologo Marino<br>Instituto Alexander von Humboldt<br>Colombia       |

|                                                                                                                           |                                                                                                                     |                                                                                                                                                        |
|---------------------------------------------------------------------------------------------------------------------------|---------------------------------------------------------------------------------------------------------------------|--------------------------------------------------------------------------------------------------------------------------------------------------------|
| Coscarella, Mariano Alberto<br>Researcher<br>CONICET<br>Argentina                                                         | Cosgrove, Anita<br>Research Assistant<br>The University of Queensland<br>Australia                                  | Cosic, Nada<br>Research Associate<br>Institute for Biological Research "Sinisa Stankovic"<br>University of Belgrade<br>Serbia                          |
| Cosijn, Michaela<br>International Development Research Scientist<br>Australia                                             | Cosio, Claudia<br>Professor of ecotoxicology<br>University of Reims<br>France                                       | Cossa, Daniel<br>Biogeochemist<br>Université Grenoble Alpes<br>Canada                                                                                  |
| Cossic, Brieuc<br>Resident in Veterinary Anatomic Pathology<br>Cornell University<br>United States of America (the)       | Cosson, Jean François *<br>Senior Scientist<br>INRA (French National Institute for Agricultural Research)<br>France | Costa, Alysso<br>Lecturer Mathematics<br>University of Melbourne<br>Australia                                                                          |
| Costa, Erli S.<br>Professor<br>Universidade Estadual do Rio Grande do Sul<br>Brazil                                       | Costa, Fabiola<br>Pos-Doctor<br>The Federal University of Pará<br>Brazil                                            | Costa, Federico<br>Professor of Epidemiology and Environmental Health<br>Institute of Collective Health - Federal University of Bahia<br>Brazil        |
| Costa, Joana<br>Portugal                                                                                                  | Costa, Luciano T.<br>Associate Professor/ Physical Chemistry<br>Universidade Federal Fluminense<br>Brazil           | Costa, Maria *<br>SMARTLAND PROJECT COORDINATOR<br>UTPL<br>Ecuador                                                                                     |
| Costa, Matthew<br>Doctoral Student<br>Scripps Institution of Oceanography<br>United States of America (the)               | Costa, Newton Clovis Fretas da<br>PhD Student<br>UFSC<br>Brazil                                                     | Costa, Patricia<br>Researcher - Management and Conservation of Natural<br>Resources<br>Brazilian Agricultural Research Corporation (Embrapa)<br>Brazil |
| Costa, Raquel<br>PhD candidate<br>Kyoto University<br>Portugal                                                            | Costa, Rosangela<br>Universidade Federal de São Paulo (Unifesp)<br>Brazil                                           | Costa, Suzana<br>PhD student/ Systematic Botany<br>Unicamp<br>Brazil                                                                                   |
| Costa Abecasis, Rita<br>Science Communication Officer<br>Centro de Ciências do Mar da Universidade do Algarve<br>Portugal | Costa do Nascimento, Maria Lauta<br>Assistant Professor<br>University of Campinas<br>Brazil                         | Costa Junior, Leopoldo<br>economist<br>University of Brasilia and Ministry of Planning<br>Brazil                                                       |

|                                                                                                                                                                                                                      |                                                                                                                                                                                             |                                                                                                        |
|----------------------------------------------------------------------------------------------------------------------------------------------------------------------------------------------------------------------|---------------------------------------------------------------------------------------------------------------------------------------------------------------------------------------------|--------------------------------------------------------------------------------------------------------|
| Costalago, David<br>Postdoc researcher<br>Costalago<br>Sweden                                                                                                                                                        | Costa-Lotufo, Leticia<br>Professor of Pharmacology<br>Universidade de São Paulo<br>Brazil                                                                                                   | Costas, Eduardo<br>Professor of Genetic<br>Complutense University of Madrid<br>Spain                   |
| Coste, Sabrina<br>Associate Professor<br>Université de Guyane, UMR EcoFoG (AgroParisTech,<br>CIRAD, CNRS, INRA, UA, UG), French Guiana<br>French Guiana                                                              | Costello, Mark<br>Biodiversity<br>University of Auckland<br>New Zealand                                                                                                                     | COSTER, Quentin<br>Teacher<br>Belgium                                                                  |
| Cota, Andres<br>MsC, Science writer, president of the "society of<br>anonymous scientists"<br>Mexico                                                                                                                 | Cote, Isabelle<br>Professor of Marine Ecology<br>Simon Fraser University<br>Canada                                                                                                          | Cote, Julien<br>Researcher<br>CNRS<br>France                                                           |
| Côté, Benoît<br>Associate=Professor<br>McGill University<br>Canada                                                                                                                                                   | Côté, Steeve<br>Professor<br>Laval University<br>Canada                                                                                                                                     | Cott, Angela<br>Biologist<br>United Kingdom of Great Britain and Northern Ireland<br>(the)             |
| Cottier-Cook, Elizabeth<br>Senior Lecturer in Marine Biology, specialising in Marine<br>Invasive Species<br>Scottish Association for Marine Science<br>United Kingdom of Great Britain and Northern Ireland<br>(the) | Cotton, Pete<br>Senior Lecturer in Ecology<br>University of Plymouth<br>United Kingdom of Great Britain and Northern Ireland<br>(the)                                                       | Cottrell, Anthony<br>Ph.D Chemistry<br>Agriculture & Agrifood Canada<br>Canada                         |
| Coudrain, Anne<br>DR honoraire<br>IRD<br>France                                                                                                                                                                      | Coudrat, Camille<br>Founder, director, biologist<br>Projection Anoulak ( <a href="http://www.conservationlaos.com">www.conservationlaos.com</a> )<br>Lao People's Democratic Republic (the) | Coulombe, Gabrielle<br>Wildlife Biologist<br>Canada                                                    |
| Coulson, Tim<br>Professor of Zoology<br>University of Oxford<br>United Kingdom of Great Britain and Northern Ireland<br>(the)                                                                                        | Coulter, John<br>Retired formerly medical research, have degrees in<br>medicine<br>Australia                                                                                                | Counillon, Laurent<br>Biochemistry and Molecular Biology Professor<br>University Côte d'Azur<br>France |
| Courbin, Nicolas<br>PostDoctoral Fellow<br>CNRS - CEFE<br>France                                                                                                                                                     | Courchamp, Franck *<br>Director of Research<br>Centre National de la Recherche Scientifique<br>France                                                                                       | Courtiol, Alexandre<br>Evolutionary Biology<br>IZW, Berlin<br>Germany                                  |
| Cousineau, Susan V.<br>Adjunct Professor (Biology/Ecology)<br>California Lutheran University<br>United States of America (the)                                                                                       | Cousins, Stephen<br>PhD student in Conservation Ecology<br>Stellenbosch University<br>South Africa                                                                                          | Coustau, Christine<br>CNRS Research Director, Parasitology<br>CNRS<br>France                           |

|                                                                                                                                            |                                                                                                               |                                                                                                                                   |
|--------------------------------------------------------------------------------------------------------------------------------------------|---------------------------------------------------------------------------------------------------------------|-----------------------------------------------------------------------------------------------------------------------------------|
| Coutellec, Marie-Agnès<br>research scientist<br>INRA<br>France                                                                             | COUTINHO, ISABEL<br>Post-doctoral Research<br>Embrapa Instrumentação<br>Germany                               | Coutinho, Jeferson<br>PHD student / Biology Teacher<br>Federal University of Bahia / Federal Institute of Bahia<br>Brazil         |
| Couto, Eduardo *<br>Full Professor<br>Universidade Federal de Mato Grosso<br>Brazil                                                        | Couto, Ricardo<br>Assistant Professor<br>Universidade Iguazu - UNIG<br>Brazil                                 | Couto, Thiago<br>PhD student in Fisheries and Aquatic Sciences<br>University of Washington<br>Brazil                              |
| Couture, Raoul-Marie<br>Biogeochemist<br>Norwegian Institute for Water Research<br>Norway                                                  | Couturier, Lydie<br>Postdoctoral fellow in Marine Sciences<br>Université de Bretagne Occidentale<br>France    | couvet, denis<br>professor in ecology<br>Muséum National d'Histoire Naturelle de Paris<br>France                                  |
| Covarrubias, Alejandra<br>Professor/Plant Biology<br>Universidad Nacional Autónoma de México<br>Mexico                                     | Cove, Michael<br>Research Associate<br>North Carolina State University<br>United States of America (the)      | Covernton, Garth<br>PhD Student - Marine Ecology<br>University of Victoria<br>Canada                                              |
| Covi, Joseph<br>Assistant Professor of Integrative Biology<br>University of North Carolina at Wilmington<br>United States of America (the) | Cowley, Kirsten<br>PhD Student<br>Macquarie University<br>Australia                                           | Cox, David<br>Principal Research Scientist / Nutrition<br>CSIRO<br>Australia                                                      |
| Cox, Felicity<br>Associate Professor Speech Science<br>Macquarie University<br>Australia                                                   | Cox, Kieran<br>PhD Student<br>University of Victoria<br>Canada                                                | Cox, Nastassja<br>Scientist<br>Australia                                                                                          |
| Cox, Wylie<br>Biologist<br>retired<br>United States of America (the)                                                                       | Coyne, Peter<br>Ecologist<br>Retired<br>Australia                                                             | Cózar, Andrés<br>Professor<br>Departamento de Biología, Universidad de Cadiz<br>Spain                                             |
| Cozza, John<br>Biology Lecturer<br>Florida International University<br>United States of America (the)                                      | Crabb, Lauren<br>Lecturer in OB and HRM<br>United Kingdom of Great Britain and Northern Ireland<br>(the)      | Crabbe, James<br>Professor<br>Wolfson College, Oxford University<br>United Kingdom of Great Britain and Northern Ireland<br>(the) |
| Craemer, Charnie *<br>Senior Researcher Acarologist<br>South Africa                                                                        | Craft, Joseph<br>Professor of Medicine and Immunobiology<br>Yale University<br>United States of America (the) | Craig, Apryle<br>University of Washington<br>United States of America (the)                                                       |

|                                                                                                                                                                            |                                                                                                                                                             |                                                                                                                                     |
|----------------------------------------------------------------------------------------------------------------------------------------------------------------------------|-------------------------------------------------------------------------------------------------------------------------------------------------------------|-------------------------------------------------------------------------------------------------------------------------------------|
| Craig, Jessica<br>Research fellow<br>University of Aberdeen<br>United Kingdom of Great Britain and Northern Ireland (the)                                                  | Craig, Peter<br>Marine ecologist<br>United States of America (the)                                                                                          | Crain, Benjamin<br>Ecologist<br>United States of America (the)                                                                      |
| Cramer, Abigail<br>United States of America (the)                                                                                                                          | Crampton, David<br>Researcher Emeritus Astrophysics<br>University of Victoria<br>Canada                                                                     | Crampton, Lisa<br>Project Leader<br>Pacific Cooperative Studies Unit, University of Hawaii, Manoa<br>United States of America (the) |
| Crane, Philippa<br>Psychologist/Lifestyle Medicine<br>Australia                                                                                                            | Crane, Rebecca<br>Director, Centre for Mindfulness Research and Practice<br>Bangor University<br>United Kingdom of Great Britain and Northern Ireland (the) | Cranston, Peter<br>emeritus professor, entomology<br>Australian National University<br>Australia                                    |
| Crawford, Andrew<br>Associate Professor, Biological Sciences<br>Universidad de los Andes<br>Colombia                                                                       | Crawford, John<br>Wildlife Ecologist<br>National Great Rivers Research and Education Center<br>United States of America (the)                               | Crawford, Michael<br>Ecology<br>University Potsdam<br>Germany                                                                       |
| Crayn, Darren<br>Professor and Director, Australian Tropical Herbarium<br>James Cook University<br>Australia                                                               | Creary Ford, Marcia<br>Data Manager/PhD Candidate-Coral Reefs<br>University of the West Indies<br>Jamaica                                                   | Creech, Tyler<br>Ecologist<br>Center for Large Landscape Conservation<br>United States of America (the)                             |
| Creedon, Corey<br>Master of Environmental Management Candidate 2018<br>Yale School of Forestry and Environmental Studies<br>United States of America (the)                 | Creet, Ella<br>PhD Student<br>New Zealand                                                                                                                   | Crego, Ramiro<br>PhD Candidate<br>University of North Texas<br>Argentina                                                            |
| Crespin, Silvio J<br>Ecology & Conservation Biology<br>Instituto de Investigaciones Tropicales de El Salvador<br>El Salvador                                               | Crespo, Daniel<br>Researcher<br>Portugal                                                                                                                    | Crespo, Julio E.<br>Associate Professor in Natural Sciences and Sustainability<br>Universidad de Los Lagos<br>Chile                 |
| CRESPO, REGINA AIDA<br>Historian. Researcher and profesor<br>Centro de Investigaciones sobre América Latina y el Caribe- Universidad Nacional Autónoma de México<br>Mexico | Cresswell, Ben *<br>MSc Candidate Tropical Marine Biology<br>United Kingdom of Great Britain and Northern Ireland (the)                                     | Cresswell, Richard<br>Principal Hydrogeologist<br>International Association of Hydrogeologists<br>Australia                         |

|                                                                                                                                                                                                               |                                                                                                                              |                                                                                                                                              |
|---------------------------------------------------------------------------------------------------------------------------------------------------------------------------------------------------------------|------------------------------------------------------------------------------------------------------------------------------|----------------------------------------------------------------------------------------------------------------------------------------------|
| Cresswell, Tom<br>Environmental Toxicology<br>Australia                                                                                                                                                       | Crevecoeur, Sophie<br>post-doctoral fellow<br>Université du Québec à Montréal<br>Canada                                      | Criollo, Paulina<br>Industrial Ecology<br>TU Delft<br>Ecuador                                                                                |
| Cripps, Simon<br>Chief Executive / Oceanographer<br>Dorset Wildlife Trust<br>United Kingdom of Great Britain and Northern Ireland (the)                                                                       | Criscuolo, Francois<br>Permanent researcher in evolutionary biology<br>CNRS, University of Strasbourg<br>France              | Crisp, Michael<br>Emeritus Professor (Plant systematics and ecology)<br>The Australian National University<br>Australia                      |
| Crispim, Jose Antonio<br>Professor Geology retired<br>Faculty of Sciences - University of Lisbon<br>Portugal                                                                                                  | Cristescu, Romane<br>Postdoc, Ecology<br>University of the Sunshine Coast<br>Australia                                       | Cristina, Coccia<br>Postdoctoral researcher<br>Pontificia universidad católica de chile<br>Chile                                             |
| Cristo, Margarida<br>Professor<br>Centre of Marine Sciences CCMAR and University of Algarve<br>Portugal                                                                                                       | Crivova, Olga<br>Scientific researcher/Climatology<br>Institute of Ecology and Geography of ASM<br>Moldova (the Republic of) | Crnobrna, Brian<br>Global Development Scholar<br>Arizona State University<br>Peru                                                            |
| Crnobrnja-Isailović, Jelka<br>Full Professor&Principal Research Fellow, Biology<br>Faculty of Sciences and Mathematics University of Niš & Institute for Biological Research University of Belgrade<br>Serbia | Crocetta, Fabio<br>Marine biology<br>Stazione Zoologica Anton Dohrn<br>Italy                                                 | Crombach, Anton<br>Team leader<br>CIRB, Collège de France<br>France                                                                          |
| Crombie, Merle<br>Habitat Biologist<br>Ministry of Forests, Lands, and Natural Resource Operations<br>Canada                                                                                                  | Crombie, Merle<br>M.Sc. Ecology<br>UBC<br>Canada                                                                             | Cronin, Heather<br>Marine Scientist: Video Analyst<br>Gulf of Maine Research Institute and Ecotrust Canada<br>United States of America (the) |
| Cross, Paul<br>Senior Lecturer in the Environment<br>Bangor University<br>United Kingdom of Great Britain and Northern Ireland (the)                                                                          | Cross, Wyatt<br>Freshwater Ecologist<br>Montana State University<br>United States of America (the)                           | Crossey, Bruce<br>BSc Zoology<br>University of Pretoria<br>South Africa                                                                      |
| Crost, Cecile<br>research assistant<br>Universite de Montreal<br>Canada                                                                                                                                       | Crother, Brian<br>Professor of Biology<br>Southeastern Louisiana University<br>United States of America (the)                | Crouch, Esther *<br>Zoo Pathology Resident<br>Cornell Univeristy<br>Australia                                                                |



|                                                                                                                                                  |                                                                                                                        |                                                                                                                                                    |
|--------------------------------------------------------------------------------------------------------------------------------------------------|------------------------------------------------------------------------------------------------------------------------|----------------------------------------------------------------------------------------------------------------------------------------------------|
| Crouch, Nick<br>Ecology and Education<br>TAFESA<br>Australia                                                                                     | Crouzeilles, Renato<br>Ecologist<br>International Institute for Sustainability<br>Brazil                               | Crowley, Liam<br>Post-graduate researcher<br>University of Birmingham<br>United Kingdom of Great Britain and Northern Ireland (the)                |
| Croy, Jordan<br>Graduate Student<br>University of California, Irvine<br>United States of America (the)                                           | Crozariol, Marco<br>PhD. Zoology<br>Brazil                                                                             | Croze, Harvey *<br>Ecologist, D.Phil (Oxon)<br>Serengeti Research Institute, Amboseli Trust for Elephants, UNEP, Friends of Karura Forest<br>Kenya |
| Crozier, George<br>Environmental science<br>University of Tasmania<br>Australia                                                                  | Cruaud, Astrid<br>Associate researcher<br>INRA<br>France                                                               | CRUAUD, Philippe<br>Microbiologist Ph. D.<br>APHP<br>France                                                                                        |
| Cruddas, Peter<br>Lecturer in Civil and Environmental Engineering<br>Botswana International University of Science and Technology<br>Botswana     | Crumière, Antonin<br>PhD Student<br>Institute of Functional Genomics of Lyon, ENS Lyon<br>France                       | Crump, Martha<br>Adjunct Professor<br>Utah State University<br>United States of America (the)                                                      |
| Crutzen, Paul J.<br>Professor Emeritus<br>Max-Planck-Institute for Chemistry<br>Germany                                                          | Cruywagen, Elsie<br>Postdoctoral research fellow / Plant Pathologist<br>Agricultural Research Council<br>South Africa  | Cruz, Anna<br>Doctor student of Demography<br>Unicamp<br>Brazil                                                                                    |
| Cruz, Mateus<br>PhD Student in General Physiology<br>University of Sao Paulo<br>Brazil                                                           | Cruz, Paulo<br>Professor<br>Universidade Federal de Rondônia<br>Brazil                                                 | Cruz-Barraza, Jose Antonio<br>Titular Researcher<br>Instituto de Ciencias del Mar y Limnología, Universidad Nacional Autónoma de México<br>Mexico  |
| Cruz-Flores, Gerardo<br>Research professor<br>universidad Nacional Autónoma de México FES Zaragoza<br>Mexico                                     | Cruz-López, Medardo<br>PhD Candidate-Marine Biology<br>Institute of Marine Sciences and Limnology-UNAM<br>Mexico       | Cruz-Pol, Sandra<br>Professor in Microwave Remote Sensing -Electrical Engineering<br>UPR- Mayaguez<br>United States of America (the)               |
| Cryan, Jason<br>Deputy Director and Chief, Research & Collections<br>North Carolina Museum of Natural Sciences<br>United States of America (the) | Csillery, Katalin<br>Research Fellow in forest ecology and genetics<br>ETH Zurich and WSL Birmensdorf<br>Switzerland   | Csuzdi, Csaba<br>Professor of Zoology<br>Eszterházy Károly University, Eger<br>Hungary                                                             |
| Cuartero, Fernando<br>Professor of Computer Science<br>University of Castilla-La Mancha<br>Spain                                                 | Cubaynes, Sarah<br>Associate Professor in Biodemography<br>Ecole Pratique des Hautes Etudes / PSL University<br>France | Cubilla-Rios, Luis<br>Full Professor<br>University of Panamá<br>Panama                                                                             |

|                                                                                                                                               |                                                                                                                                                    |                                                                                                                  |
|-----------------------------------------------------------------------------------------------------------------------------------------------|----------------------------------------------------------------------------------------------------------------------------------------------------|------------------------------------------------------------------------------------------------------------------|
| Cucurachi, Stefano<br>Assistant Professor in Industrial Ecology<br>Leiden University<br>Netherlands (the)                                     | Cuenca, Mirabai<br>Biochemistry student<br>Universidad Autónoma de Madrid - Centro Nacional de Investigaciones Oncológicas (CNIO, Madrid)<br>Spain | Cuervo, Andrés<br>Instituto Alexander von Humboldt<br>Colombia                                                   |
| Cuervo, José Javier<br>Senior Research Scientist / Evolutionary Ecology<br>National Museum of Natural Sciences (MNCN-CSIC)<br>Spain           | Cueto Romero, Miguel<br>Associate Professor<br>Universidad de Almería<br>Spain                                                                     | Cuetos, Alejandro<br>Profesor Titular Universidad, Physical Chemistry<br>Universidad Pablo de Olavide<br>Spain   |
| Cuevas, eduardo<br>Proffesor<br>Universidad Michoacana de San Nicolás de Hidalgo<br>Mexico                                                    | Cuevas, Francisco J<br>PhD candidate / Food Science<br>IFAPA<br>Spain                                                                              | Cugnon, Thibaut<br>UCL<br>Belgium                                                                                |
| Cuhra, Marek<br>Researcher PhD<br>Norwegian Institute of Marine Research<br>Norway                                                            | Cui, Junbo<br>climate scientist<br>University of Hamburg<br>Germany                                                                                | Cullen, Karen<br>Research Officer/Molecular systematics<br>Western Australian Museum<br>Australia                |
| culliford, Steven<br>Biomedical Scientist<br>NHSBT<br>United Kingdom of Great Britain and Northern Ireland (the)                              | Culot, Laurence<br>Assistant Professor<br>Sao Paulo State University<br>Brazil                                                                     | Culter, James<br>Senior Scientist, Benthic Ecologist<br>Mote Marine Laboratory<br>United States of America (the) |
| cultid-Medina, carlos<br>Posdoctoral research<br>Argentina                                                                                    | Culwick, Christina *<br>Researcher<br>GCRO<br>South Africa                                                                                         | Cumbo, Vivian<br>PhD in Marine Biology<br>Macquarie University<br>Australia                                      |
| Cumming, Erin<br>PhD Candidate<br>Deakin University<br>Australia                                                                              | Cundall, David<br>Professor of Biological Sciences<br>Lehigh University<br>United States of America (the)                                          | Cunha, Amanda<br>Postdoctoral researcher<br>University of Sao Paulo<br>Brazil                                    |
| Cunha, Carlo<br>Professor<br>Universidade Metropolitana de Santos<br>Brazil                                                                   | Cunha, Felipe<br>Researcher - Lawyer<br>Universidade Federal da Bahia<br>Brazil                                                                    | Cunha-Saraiva, Filipa<br>PhD student of Behavioural Ecology<br>Konrad Lorenz Institute of Ethology<br>Austria    |
| Cuni Sanchez, Aida *<br>Researcher-Environmental Sciences<br>University of York<br>United Kingdom of Great Britain and Northern Ireland (the) | Cunico, Almir<br>Professor/ Ecology<br>Federal University of Paraná<br>Brazil                                                                      | Cunillera-Montcusí, David<br>PhD Student<br>Universitat de Girona<br>Spain                                       |

|                                                                                                                                                                              |                                                                                                                                                                   |                                                                                                                                       |
|------------------------------------------------------------------------------------------------------------------------------------------------------------------------------|-------------------------------------------------------------------------------------------------------------------------------------------------------------------|---------------------------------------------------------------------------------------------------------------------------------------|
| Cunningham, Andrew<br>Professor of Wildlife Epidemiology<br>Institute of Zoology, Zoological Society of London<br>United Kingdom of Great Britain and Northern Ireland (the) | Cunningham, Devin<br>Astrophysics<br>United States of America (the)                                                                                               | Cunningham, George<br>PhD Candidate<br>University of Tasmania<br>Australia                                                            |
| Curbera, Guillermo *<br>Professor of Mathematical Analysis<br>Universidad de Sevilla<br>Spain                                                                                | Curiel Yuste, Jorge<br>Research Professor<br>BC3-Basque Center for Climate Change<br>Spain                                                                        | Curran, Tim<br>Senior Lecturer in Ecology<br>Lincoln University<br>New Zealand                                                        |
| Currano, Ellen<br>Associate Professor, Dept. of Botany<br>University of Wyoming<br>United States of America (the)                                                            | Currie, Andrew<br>Senior Lecturer/Immunology<br>Murdoch University<br>Australia                                                                                   | Currier, Kitty<br>PhD Candidate<br>Department of Geography, University of California, Santa Barbara<br>United States of America (the) |
| Curry, Tierra<br>Conservation Biologist<br>Center for Biological Diversity<br>United States of America (the)                                                                 | Curtis, Joseph<br>Technician<br>UC Santa Barbara<br>United States of America (the)                                                                                | Curtis, Judd<br>Research Scientist, Fisheries Ecology<br>Texas A&M University-Corpus Christi<br>United States of America (the)        |
| Curtis, Michelle<br>Research Associate<br>San Diego Zoo's Institute for Conservation Research<br>United States of America (the)                                              | Curtsdotter, Alva<br>PhD<br>Swedish University of Agricultural Sciences<br>Sweden                                                                                 | Cury, Jean<br>PhD student<br>Pasteur Institute<br>France                                                                              |
| Cushing Falanruw, Marjorie Vernita<br>Biologist<br>Yap Institute of Natural Science<br>Micronesia (Federated States of)                                                      | Custodio, Jackeline<br>Estudante<br>Unifesp<br>Brazil                                                                                                             | Custodio, Marcio Reis<br>Professor<br>Universidade de Sao Paulo<br>Brazil                                                             |
| Cuthbert, Richard<br>Conservation Biologist<br>United Kingdom of Great Britain and Northern Ireland (the)                                                                    | CUTRERA, LIA GABRIELA<br>FLORICULTURE AND GARDENING TECHNIQUE<br>JARDIN BOTANICO CARLOS THAYS<br>Argentina                                                        | Cutt, Penny<br>Senior Associate, Marine Ecology<br>United States of America (the)                                                     |
| Cutting, Marjorie<br>Environmental Scientist/Planner<br>Consultant<br>Australia                                                                                              | Cuvelier, Daphne<br>Postdoctoral researcher Deep-sea ecology<br>MARE - Marine and Environmental Sciences Centre<br>Portugal                                       | Cyronak, Tyler<br>Postdoctoral Researcher<br>Scripps Institution of Oceanography<br>United States of America (the)                    |
| Cyrus, Stacey<br>Biological Scientist- bat specialist<br>private (previously University of Cape Town)<br>South Africa                                                        | Czarkwiani, Anna<br>PhD student in Stem Cell and Developmental Biology<br>University College London<br>United Kingdom of Great Britain and Northern Ireland (the) | Czeher, Cyrille<br>Medical Entomologist<br>France                                                                                     |

|                                                                                                                                                                                         |                                                                                                    |                                                                                                                                                         |
|-----------------------------------------------------------------------------------------------------------------------------------------------------------------------------------------|----------------------------------------------------------------------------------------------------|---------------------------------------------------------------------------------------------------------------------------------------------------------|
| Czitrom, Steven<br>Senior Researcher<br>Universidad Nacional Autónoma de México<br>Mexico                                                                                               | Czyż, Beata<br>ecologist, ornithologist<br>University of Wrocław<br>Poland                         | DA COSTA, JOSE<br>RESEARCHER (RETIRED)/PHYSICS<br>NATIONAL INSTITUTE OF SPACE RESEARCH<br>Brazil                                                        |
| da Cruz, Aparecido<br>Coordinator of research on reduction of risk of<br>environmental disasters<br>UNATECIS / NUPREC - Nucleus of Studies and Actions in<br>Civil Protection<br>Brazil | da Graça, Carlos Henrique<br>PhD Student in Geograph<br>Universidade Estadual de Maringá<br>Brazil | da Graça, Weferson<br>Professor/Zoology and Biogeography<br>Universidade Estadual de Maringá<br>Brazil                                                  |
| Da Mosto, Jane<br>Executive Director<br>We are here Venice<br>Italy                                                                                                                     | da Rocha, Chayane<br>Brazil                                                                        | da Silva, Alexandre<br>Biologist, Master's student in Biological Sciences.<br>State University of Londrina<br>Brazil                                    |
| Da Silva, Edson<br>Professor<br>Federal University of Jequitinhonha and Mucuri Valleys<br>Brazil                                                                                        | da Silva, Eduardo M.<br>Associate Professor/Ecology<br>Federal University of Bahia<br>Brazil       | da Silva, Isadora<br>Biologist<br>silva<br>Brazil                                                                                                       |
| da Silva, Jessica<br>Postdoctoral fellow<br>South African National Biodiversity Institute<br>South Africa                                                                               | da Silva, Kena<br>PhD Ecology<br>Universidade de Santa Cruz<br>Brazil                              | da Silva Carvalho, Carolina<br>PhD student<br>Universidade Estadual Paulista (UNESP)<br>Brazil                                                          |
| Da Silva Loayza, Mariana<br>Conservation biologist<br>University of Oxford<br>Bolivia (Plurinational State of)                                                                          | Da Silva Olimpio, Fabiana Regina<br>Biologo/ mestranda<br>Unifesp<br>Brazil                        | da Silva Ribeiro, Ricardo<br>Taxonomy and Systematic Botany, Phylogentic Approach<br>and Biogeograph<br>Universidade do Estado de Mato Grosso<br>Brazil |
| Dade, Marie<br>PhD Candidate, Landscape Ecology<br>University of Queensland<br>Australia                                                                                                | Dadvar, Maral<br>Postdoc<br>Stuttgart Media University - Global Young Academy<br>Germany           | Dafre, Alcir *<br>Head of Department of Biochemistry/Biochemistry<br>Federal University of Santa Catarina (UFSC)<br>Brazil                              |
| Dagsson-Waldhauserova, Pavla<br>post doc. atmospheric science<br>(Agricultural) University of Iceland + Czech University of<br>Life Sciences<br>Iceland                                 | Dahab, Ricardo<br>Associate Professor<br>University of Campinas - UNICAMP<br>Brazil                | Dahal, Nishma<br>PhD student of ecology and evolution<br>Nature conservation Foundation<br>India                                                        |

|                                                                                                                                                       |                                                                                                                               |                                                                                                                                                  |
|-------------------------------------------------------------------------------------------------------------------------------------------------------|-------------------------------------------------------------------------------------------------------------------------------|--------------------------------------------------------------------------------------------------------------------------------------------------|
| Dahl, Åslög<br>Researcher, Biological and Environmental Sciences<br>University of Gothenburg, Dep. of Biological and Environmental Sciences<br>Sweden | Dahl, Tais W.<br>Assistant Professor of Geobiology<br>University of Copenhagen<br>Denmark                                     | Dahlgren, Thomas<br>Senior Scientist Marine Biology<br>Uni Research<br>Norway                                                                    |
| Dailianis, Thanos<br>Postdoctoral Researcher, Marine Biology<br>Hellenic Centre for Marine Research<br>Greece                                         | Daily, Gretchen<br>Stanford University<br>United States of America (the)                                                      | Dainese, Matteo<br>Post Doc<br>University of Würzburg<br>Germany                                                                                 |
| Dakhil, Mohammed<br>Assistant Lecturer of Plant Ecology<br>Helwan University<br>Egypt                                                                 | Dal Corso, Alessandro<br>Phd Student<br>Technical University of Denmark<br>Denmark                                            | Dalago Salgado, Lilian<br>PhD Student in Ecology and Conservation<br>Universidade Federal do Paraná (UFPR)<br>Brazil                             |
| Dalbeck, Lisa<br>Veterinary Genetics<br>University of Ca, Davis<br>United States of America (the)                                                     | Dalbelo, Thalita<br>Architect and Urban Planner<br>Unicamp<br>Brazil                                                          | D'Alcamo, Susan<br>Botany<br>California Academy of Sciences<br>United States of America (the)                                                    |
| D'Alelio, Domenico<br>Aquatic ecologist<br>Stazione Zoologica Anton Dorhn Napoli<br>Italy                                                             | Dalfré, Mariá<br>Student of Ecology<br>Universidade Estadual Paulista "Júlio de Mesquita Filho" - Campus Rio Claro.<br>Brazil | Dall, Sasha<br>Associate Professor of Mathematical Ecology<br>University of Exeter<br>United Kingdom of Great Britain and Northern Ireland (the) |
| Dall'Antonia, Fabio<br>Bioinformatician<br>European Molecular Biology Laboratory<br>Germany                                                           | Dallas, Helen<br>Researcher Freshwater Ecology<br>Freshwater Research Centre<br>South Africa                                  | Dallmeier, Francisco<br>Director Center for Conservation and Sustainability at SCBI<br>Smithsonian Institution<br>United States of America (the) |
| Dallmeier, Julian<br>Biomedical Research in Neuroscience<br>University of Navarra<br>Spain                                                            | DALLOT, Sylvie<br>researcher<br>INRA Montpellier<br>France                                                                    | Daltry, Jennifer<br>Conservation Biologist<br>United Kingdom of Great Britain and Northern Ireland (the)                                         |
| Dalziell, Emma<br>Research Associate<br>Curtin University<br>Australia                                                                                | Dambacher, Jeffrey<br>Senior Research Scientist<br>CSIRO<br>Australia                                                         | D'Ambrosio, D. Sabina<br>Postdoctoral researcher - Paleolimnology<br>Argentina                                                                   |
| Damiani, Laura<br>University of Hawaii Manoa<br>United States of America (the)                                                                        | Damiani, Mattia<br>Researcher<br>Irstea<br>France                                                                             | D'Amico, Frank J.N.<br>Associate Professor in Ecology<br>UNIV PAU & PAYS ADOUR, UMR 5142, 64600, ANGLET<br>France                                |

|                                                                                                            |                                                                                                                                              |                                                                                                                                                                                                       |
|------------------------------------------------------------------------------------------------------------|----------------------------------------------------------------------------------------------------------------------------------------------|-------------------------------------------------------------------------------------------------------------------------------------------------------------------------------------------------------|
| Damien, Chevallier<br>Researcher<br>CNRS<br>France                                                         | Damiens, Florence<br>PhD Candidate<br>RMIT University<br>Australia                                                                           | D'Ammando, Giacomo<br>PhD Student<br>Mammalian Behaviour and Evolution Group; Institute of Integrative Biology; University of Liverpool<br>United Kingdom of Great Britain and Northern Ireland (the) |
| D'Amore, Danielle<br>Ohio University<br>United States of America (the)                                     | D'Anastasi, Blanche<br>PhD Candidate, Marine Wildlife Conservation Genomics<br>James Cook University<br>Australia                            | d'Andrimont, Raphaël<br>Researcher in Agronomy<br>Université catholique de Louvain<br>Belgium                                                                                                         |
| Daneliya, Mikhail<br>Biologist<br>Finland                                                                  | Daniel, Cavallari<br>Lab Technician, Biologist<br>Universidade de São Paulo<br>Brazil                                                        | Daniel, Edwin *<br>Professor Emeritus and Pharmacology<br>University of Alberta and McMaster University<br>Canada                                                                                     |
| Daniel, Gabriela<br>Biologist - post graduated student<br>Universidade Estadual Paulista - UNESP<br>Brazil | Daniel, Heide-Marie<br>Belgium                                                                                                               | DANIEL, Jérémy<br>Environment engineer<br>IFREMER<br>France                                                                                                                                           |
| Danielo, Morgan<br>PhD student<br>Oceanographic Institute, University of Sao Paulo<br>Brazil               | Daniels, Matthew<br>Physics<br>Carnegie Mellon University<br>United States of America (the)                                                  | Daniels, Peter<br>Ecological economist<br>Griffith University<br>Australia                                                                                                                            |
| Danielsson Villegas, Luis Miguel<br>Research Intern - Computer Science<br>IMDEA Software<br>Spain          | Danise, Silvia<br>Marie Curie Research Fellow<br>Plymouth University<br>United Kingdom of Great Britain and Northern Ireland (the)           | Danks, Melissa<br>Centre for Ecosystem Management<br>Edith Cowan University<br>Australia                                                                                                              |
| Dannemann, Teodoro<br>Research Assistant<br>Universidad Austral de Chile<br>Chile                          | Danner, Marie-Claire<br>Freshwater Ecology<br>University of Roehampton, London<br>United Kingdom of Great Britain and Northern Ireland (the) | D'Annibale, Aline<br>Medical student<br>Unicamp<br>Brazil                                                                                                                                             |
| Dantas, Carlos<br>Professor<br>UFPE<br>Brazil                                                              | Dantas, Mário<br>Associate Professor<br>Universidade Federal da Bahia (IMS/CAT)<br>Brazil                                                    | Dantas, Pedro<br>Biologist<br>Universidade de Brasília<br>Brazil                                                                                                                                      |

|                                                                                                                                                             |                                                                                                                                   |                                                                                                                                                       |
|-------------------------------------------------------------------------------------------------------------------------------------------------------------|-----------------------------------------------------------------------------------------------------------------------------------|-------------------------------------------------------------------------------------------------------------------------------------------------------|
| Dantas, Sidnei<br>Grant Post-doc/Zoology<br>Brazil                                                                                                          | Danzberger, Jasmin<br>PhD student<br>Institute for Groundwater Ecology<br>Germany                                                 | Dapkey, Tanya<br>Entomologist<br>University of Pennsylvania<br>United States of America (the)                                                         |
| Darbyshire, Stephen<br>Reaserch Biologist<br>Agriculture and Agri-Food Canada<br>Canada                                                                     | D'Arcy, Laura<br>Co-Director<br>Borneo Nature Foundation<br>United Kingdom of Great Britain and Northern Ireland (the)            | Darela-Filho, João Paulo<br>PhD Student<br>São Paulo State University(Unesp), Institute of Biosciences, Department of Ecology, Rio Claro-SP<br>Brazil |
| Darimont, Chris<br>Raincoast Chair & Associate Professor<br>University of Victoria<br>Canada                                                                | Darras, Hugo<br>Post-doctoral researcher<br>Université Libre de Bruxelles<br>Belgium                                              | Darras, Kevin<br>PostDoc<br>Agroecology<br>Germany                                                                                                    |
| Darszon, Alberto<br>Professor in Cell Physiology<br>Universidad Nacional Autónoma de México<br>Mexico                                                       | Das, Anita<br>Director, Research<br>Central Coir Research Institute<br>India                                                      | Das, Soumyadip<br>Mathematics<br>Indian Statistical Institute, Bangalore Centre<br>India                                                              |
| Dasgupta, Partha *<br>Frank Ramsey Professor Emeritus of Economics<br>University of Cambridge<br>United Kingdom of Great Britain and Northern Ireland (the) | Dashevsky, Daniel<br>Biology PhD Student<br>University of Queensland<br>United States of America (the)                            | Daskin, Joshua<br>Donnelley Environmental Post-Doctoral Fellow<br>Yale University<br>United States of America (the)                                   |
| Datovo, Alessio<br>Assistant Professor, Curator of Fishes<br>Museu de Zoologia da Universidade de São Paulo<br>Brazil                                       | Datta, Debajit<br>Assistant Professor of Geography<br>Jadavpur University<br>India                                                | Daudt, Louise<br>Ecology<br>University Federal of Rio de Janeiro<br>Brazil                                                                            |
| Dauwe, Dimitri<br>PhD student<br>Hasselt University<br>Belgium                                                                                              | Davalos, Liliana M.<br>Ecology and Evolution<br>Stony Brook University<br>United States of America (the)                          | Davee Guimaraes, Jean Remy<br>Full Professor<br>IBCCF/UFRJ<br>Brazil                                                                                  |
| DA-VEIGA, JOSÉ-ELI<br>Senior Professor<br>University of Sao Paulo - Energy and Environment<br>Institute<br>Brazil                                           | Davenport, Tim R.B.<br>Country Director & Senior Conservationist<br>Wildlife Conservation Society<br>Tanzania, United Republic of | David, David<br>Ecology<br>Tel Aviv University<br>Israel                                                                                              |
| david, jean<br>research director, emeritus<br>CNRS<br>France                                                                                                | DAVID, Romain<br>Marine biologist<br>Institut Méditerranéen de Biodiversité et d'Ecologie marine et continentale CNRS<br>France   | Davidar, Priya<br>Professor<br>Pondicherry University<br>India                                                                                        |

|                                                                                                                                                                   |                                                                                                                                         |                                                                                                                                                             |
|-------------------------------------------------------------------------------------------------------------------------------------------------------------------|-----------------------------------------------------------------------------------------------------------------------------------------|-------------------------------------------------------------------------------------------------------------------------------------------------------------|
| DAVID-BEAUSIRE, Christine<br>Senior Scientist<br>LOPS/IUEM (Spatial and Physical Oceanography<br>Laboratory, European Marine Institute, Univ. of Brest)<br>France | Davidova, Marie<br>architectural research<br>Collaborative Collective<br>Czech Republic (the)                                           | Davidse, Gerrit<br>Senior Curator<br>Missouri Botanical Garden<br>United States of America (the)                                                            |
| Davidson, Alisha<br>Invasion Biology<br>Wayne State University<br>United States of America (the)                                                                  | Davidson, Ian<br>Principle Investigator, Marine Ecology<br>Smithsonian Environmental Research Center<br>United States of America (the)  | Davidson, Marc<br>Endowed Professor in philosophy of sustainable<br>development from a humanistic perspective<br>Maastricht University<br>Netherlands (the) |
| Davidson, Melanie<br>SCientist<br>Pland & Food Research<br>New Zealand                                                                                            | DAVIDSON, NICHOLAS<br>WETLAND ECOLOGIST<br>NICK DAVIDSON ENVIRONMENTAL<br>United Kingdom of Great Britain and Northern Ireland<br>(the) | Davidson, Zeke<br>Zoologist<br>Marwell Wildlife UK.<br>Kenya                                                                                                |
| Davies, Gillian<br>Immediate Past President<br>Society of Wetland Scientists<br>United States of America (the)                                                    | Davies, Mark<br>Professor<br>University of Sunderland<br>United Kingdom of Great Britain and Northern Ireland<br>(the)                  | Davies, Sarah<br>Research Manager, Biological Invasions<br>Stellenbosch University<br>South Africa                                                          |
| Davies, Thomas<br>Research fellow<br>University of Exeter<br>United Kingdom of Great Britain and Northern Ireland<br>(the)                                        | Davies-Mostert, Harriet<br>Head of Conservation<br>Endangered Wildlife Trust<br>South Africa                                            | Dávila, Patricia<br>Biology<br>National University of Mexico UNAM<br>Mexico                                                                                 |
| Dávila Alcocer, Víctor Manuel<br>Researcher/ Geology<br>Instituto de Geología/UNAM<br>Mexico                                                                      | Davis, Chandler<br>Professor of Mathematics<br>University of Toronto<br>Canada                                                          | Davis, Cheryl<br>Associate Provost for Research & Creative Activity<br>Western Kentucky University<br>United States of America (the)                        |
| Davis, Donald M<br>Professor of Mathematics<br>Lehigh University<br>United States of America (the)                                                                | Davis, Drew<br>PhD Candidate<br>Department of Biology, University of South Dakota<br>United States of America (the)                     | Davis, Edward<br>Postdoc Research Associate<br>Oregon State University<br>United States of America (the)                                                    |
| Davis, Joanne<br>Australia                                                                                                                                        | Davis, Joel<br>Faculty Research Assistant<br>Oregon State University<br>United States of America (the)                                  | Davis, Kay<br>Research Officer<br>National Marine Science Centre<br>Australia                                                                               |



|                                                                                                                                                   |                                                                                                                       |                                                                                                                                       |
|---------------------------------------------------------------------------------------------------------------------------------------------------|-----------------------------------------------------------------------------------------------------------------------|---------------------------------------------------------------------------------------------------------------------------------------|
| Davis, Kayla<br>PhD Candidate- Biomedical Science<br>Harvard University<br>United States of America (the)                                         | Davis, Linda<br>Analytical Lab Team Lead, Mineralogist<br>Vesuvius<br>United States of America (the)                  | Davis, Mark<br>Conservation Biologist<br>Illinois Natural History Survey<br>United States of America (the)                            |
| Davis, Matthew H.<br>Master of Public Health<br>United States of America (the)                                                                    | Davis, Robert<br>Senior Lecturer, Vertebrate Ecology<br>Edith Cowan University<br>Australia                           | Davis, Sam<br>Dogwood Alliance<br>United States of America (the)                                                                      |
| Davis, Stephen<br>Distinguished Professor of Biology<br>Pepperdine University<br>United States of America (the)                                   | Davis-Berg, Elizabeth<br>Associate Professor of Biology<br>Columbia College Chicago<br>United States of America (the) | Davison, John<br>Ecological Researcher<br>University of Tartu<br>Estonia                                                              |
| Davison, Nick *<br>Stranding coordinator<br>Scottish Marine Animal Stranding Scheme<br>United Kingdom of Great Britain and Northern Ireland (the) | Davout, Dominique<br>Professor (Marine Ecology)<br>UPMC Univ Paris 6<br>France                                        | Davuliene, Lina<br>scientist, Environmental Physics<br>Center for Physical Sciences and Technology<br>Lithuania                       |
| Davy, Damien<br>Anthropologist<br>CNRS<br>France                                                                                                  | Daweti, Nokuthula<br>Student<br>Nelson Mandela University<br>South Africa                                             | Dawson Shepherd, Alexander<br>Environmental Consultant<br>Self employed<br>United Kingdom of Great Britain and Northern Ireland (the) |
| Day, Jenny<br>Extraordinary Professor<br>Institute for Water Studies, University of the Western Cape<br>South Africa                              | Day, John<br>Emeritus Professor<br>Louisiana State University<br>United States of America (the)                       | Day, Lynn<br>Ecologist and Scientific Editor; Ph D; PG Cert Edit<br>Independent consultant<br>Australia                               |
| Dayan, Tamar<br>Professor of Zoology<br>Tel aviv University<br>Israel                                                                             | Dayananda, Salindra Kasun<br>MSc, Ecology<br>Foundation for Nature Conservation and Preservation<br>Sri Lanka         | Dayrit, Fabian<br>Chemistry<br>Ateneo de Manila University<br>Philippines (the)                                                       |
| de Abreu Meireles, Diogo<br>post-doc<br>University of Sao Paulo<br>Brazil                                                                         | de Abreu Vieira, João Luís<br>Masters Student<br>University of São Paulo<br>Brazil                                    | de Aguiar, Vânia<br>Postdoctoral Research Fellow in Neurology<br>Johns Hopkins Medical Institute<br>United States of America (the)    |
| De Alban, Jose Don<br>Research Assistant<br>National University of Singapore<br>Singapore                                                         | De Almeida, Laura Ribas<br>Oceanographer<br>Brazil                                                                    | de Almeida Fernandes Vieira, Ligia<br>Master od Science<br>Universidade Federal de Pernambuco<br>Brazil                               |

|                                                                                                                                                                |                                                                                                                                                                                                                  |                                                                                                                                                 |
|----------------------------------------------------------------------------------------------------------------------------------------------------------------|------------------------------------------------------------------------------------------------------------------------------------------------------------------------------------------------------------------|-------------------------------------------------------------------------------------------------------------------------------------------------|
| DE ANDRADE, ANTONIO CARLOS<br>Researcher - Seed Ecophysiology<br>JARDIM BOTANICO DO RIO DE JANEIRO<br>Brazil                                                   | De Angelo, Carlos<br>Assistant Researcher<br>Instituto de Biologia Subtropical (IBS), National Scientific<br>and Technical Research Council (CONICET) and National<br>University of Misiones (UNaM)<br>Argentina | de Araujo, Pedro S.<br>Retired Associated Professor of Biochemistry<br>University of São Paulo<br>Brazil                                        |
| de Arriaga Giner, Dolores<br>Professor<br>University of León<br>Spain                                                                                          | de Baat, Milo<br>PhD candidate in Aquatic Environmental Ecology<br>University of Amsterdam<br>Netherlands (the)                                                                                                  | de Bakker, Anouk<br>Post-doc<br>Université de La Rochelle, LIENSs<br>France                                                                     |
| de Bakker, Didier<br>PhD<br>WUR<br>Netherlands (the)                                                                                                           | de Bakker, Frank<br>Professor of Corporate Social Responsibility<br>IÉSEG School of Management<br>France                                                                                                         | De Barros, Alan Eduardo<br>PhD Student/ Consultant - Conservation Biology, Ecology,<br>Wildlife Management<br>University of Sao Paulo<br>Brazil |
| de Beer, ZW *<br>Professor in Microbiology<br>University of Pretoria<br>South Africa                                                                           | DE BELLIS, NICOLA<br>Librarian<br>University of Modena and Reggio Emilia<br>Italy                                                                                                                                | de Bello, Francesco<br>Professor - Plant Ecology<br>University of South Bohemia<br>Czech Republic (the)                                         |
| de Boer, Bertram F.<br>PhD candidate<br>Department of Industrial Ecology, Institute of<br>Environmental Sciences (CML), Leiden University<br>Netherlands (the) | De Bolle, Xavier<br>Preofessor<br>University of Namur<br>Belgium                                                                                                                                                 | de Camargo Soares, Maria Angelica<br>MD, Hematology<br>UNIFESP<br>Brazil                                                                        |
| De Canha, Marco Nuno<br>Postgraduate Student of Medicinal Plant Science<br>University of Pretoria<br>South Africa                                              | de Cara, Angeles<br>CNRS<br>France                                                                                                                                                                               | de Carle, Danielle<br>PhD Sudent<br>University of Toronto<br>Canada                                                                             |
| de Carvalho, Dulcinéia<br>Professor<br>Federal University of Lavras<br>Brazil                                                                                  | de Castro, Carlos<br>Applied Physics Prof.<br>University of Valladolid<br>Spain                                                                                                                                  | De Cauwer, Vera<br>Senior Lecturer<br>Namibia University of Science and Technology (NUST)<br>Namibia                                            |
| de Clercq, Deon<br>Earthling<br>The World<br>New Zealand                                                                                                       | de Crom, Engela<br>Professor / Ecological History/Human-Nature Interaction<br>Tshwane University of Technology<br>South Africa                                                                                   | de Daruvar, Antoine<br>Prof<br>University of Bordeaux<br>France                                                                                 |

|                                                                                                                                                      |                                                                                                                              |                                                                                                                                |
|------------------------------------------------------------------------------------------------------------------------------------------------------|------------------------------------------------------------------------------------------------------------------------------|--------------------------------------------------------------------------------------------------------------------------------|
| De Deurwaerder, Hannes<br>PhD Scientist<br>Ghent University<br>Belgium                                                                               | de Deus, Cláudia<br>senior researcher<br>Instituto Nacional de Pesquisas da Amazônia<br>Brazil                               | de Faria Oshima, Julia Emi<br>PhD. Student<br>UNESP Rio Claro<br>Brazil                                                        |
| de Farias, Josenilton<br>Professor/Biology<br>SEDUC-MT<br>Brazil                                                                                     | De Fex-Wolf, Daniela<br>Biologist<br>Colombia                                                                                | de Figueiredo, Eduardo<br>Professor, Agriculture and energy<br>Federal University of São Carlos<br>Brazil                      |
| de Figueiredo, Rodolfo Antônio<br>Associate Professor<br>Universidade Federal de São Carlos<br>Brazil                                                | de Foresta, Hubert<br>Senior Researcher / Ecology<br>Institut de Recherche pour le Développement (IRD -<br>France)<br>France | de França Souza, Renan<br>PhD Student - Ecology and Evolution<br>Universidade do Estado do Rio de Janeiro<br>Brazil            |
| de Freitas, Carlos Henrique<br>Professor Doutor - Ecology/Zoology<br>University Center of Araxá - UNIARAXÁ, Araxá, Minas<br>Gerais, Brazil<br>Brazil | de Froe, Evert<br>PhD student marine biology<br>NIOZ Royal Netherlands Institute for Sea Research<br>Netherlands (the)       | De Frutos, Angel<br>Postdoctoral/Ecology<br>Instituto Pirenaico de Ecología (IPE-CSIC)<br>Spain                                |
| de Godoi Pinton, Leandro<br>PhD in Geography. Geography teacher<br>ederal Institute of Education, Science and Technology of<br>São Paulo<br>Brazil   | De Goeij, Petra<br>Breeding Biology of Spoonbills<br>University of Groningen<br>Netherlands (the)                            | de Graaf, Dirk C.<br>Professor of Insect Physiology and Pathology<br>Ghent University<br>Belgium                               |
| de Grenade, Rafael<br>Agrobiodiversity; Center for Regional Food Studies<br>University of Arizona<br>United States of America (the)                  | de Grissac, Sophie<br>Ecology researcher<br>France                                                                           | de Groot-Hedlin, Catherine<br>researcher (geophysics)<br>Scripps Institution of Oceanography<br>United States of America (the) |
| de Haas, Arend<br>Conservation Ecologist<br>African Conservation Foundation<br>United Kingdom of Great Britain and Northern Ireland<br>(the)         | De Jesus Villanueva, Christina<br>Ph.D Student<br>University of Rhode Island<br>United States of America (the)               | De Jong, Femke<br>Tenure track scientist<br>Royal Netherlands Institute for Sea Research<br>Netherlands (the)                  |
| De Jonge, Cindy<br>Postdoctoral Researcher - Climate Science<br>Antwerp University<br>Belgium                                                        | De Keyzer, Els<br>PhD Student - biologist - ecologist<br>KU Leuven<br>Belgium                                                | de Kochko, Alexandre<br>Research Director<br>IRD<br>France                                                                     |
| de Koning, Alissa<br>Adjunct faculty / herpetology<br>University of La Verne<br>United States of America (the)                                       | De Kort, Hanne<br>Postdoctoral researcher<br>KU Leuven<br>Belgium                                                            | de la Broise, Denis<br>Scientist /microbiology<br>Université de Bretagne Occidentale<br>France                                 |

|                                                                                                                        |                                                                                                                                                    |                                                                                                                                                     |
|------------------------------------------------------------------------------------------------------------------------|----------------------------------------------------------------------------------------------------------------------------------------------------|-----------------------------------------------------------------------------------------------------------------------------------------------------|
| de la Cerda, Carolyn<br>Biologist<br>MD Anderson Cancer Center<br>United States of America (the)                       | de la Escosura, Andres<br>Ramon y Cajal Researcher<br>Universidad Autonoma de Madrid<br>Spain                                                      | de la Fuente, Jose<br>Professor Molecular Biology<br>SaBio. Instituto de Investigación en Recursos Cinegéticos,<br>IREC (CSIC, UCLM, JCCM)<br>Spain |
| de La Harpe, Marylaure<br>PhD Student<br>University of Viena<br>Austria                                                | de la Mata, Raul<br>Forest geneticist (PhD)<br>IRTA (Institute of Food Technology and Agriculture)<br>Spain                                        | de la Montaña, Enrique<br>Professor of Ecology<br>Universidad Laica Eloy Alfaro de Manabí<br>Spain                                                  |
| De la Puente Jeri, Santiago<br>Institute for the Oceans and Fisheries of the University of<br>British Columbia<br>Peru | De la Riva, Ignacio<br>Researcher and curator<br>CSIC<br>Spain                                                                                     | de la Rubia, M. Angeles<br>Chemical Engineering Lecturer and Researcher<br>Universidad Autonoma de Madrid<br>Spain                                  |
| de la Torre, Gema<br>Professor of Organic Chemistry<br>Universidad Autonoma de Madrid<br>Spain                         | de la Torre, J. Antonio<br>Ecology and Conservation<br>Instituto de Ecología UNAM<br>Mexico                                                        | de la Torre, Stella<br>Professor School of Biology<br>Universidad San Francisco de Quito<br>Ecuador                                                 |
| De Laender, Frederik<br>Professor of Ecology<br>University of Namur<br>Belgium                                         | de Lange, Isabelle<br>PhD candidate<br>Lincoln University<br>New Zealand                                                                           | de Lange, Siobhan<br>Physiology student<br>University of the Witwatersrand<br>South Africa                                                          |
| De Lange, Willem<br>Economics<br>CSIR<br>South Africa                                                                  | de Lara Muylaert, Renata<br>PHD student<br>São Paulo State University UNESP<br>Brazil                                                              | DE LAS HERAS, EMILIO<br>NAVAL AND OCEAN ENGINEER, MBA, AUTHOR OF BLOG<br>ON CLIMATE CHANGE<br>Spain                                                 |
| De Leon, Luis Fernando<br>Assistant Professor<br>University of Massachusetts Boston<br>United States of America (the)  | de Lillo, Enrico<br>Associate professor/acarologist-entomologist<br>University of Bari Aldo Moro<br>Italy                                          | de Lima, Elson Fernandes<br>Project Manager<br>Casa da Floresta<br>Brazil                                                                           |
| de Lima Araújo, Bruno<br>Student of Biology<br>UNIFESP<br>Brazil                                                       | De Long, Jonathan Richard<br>plant and soil ecologist<br>University of Manchester<br>United Kingdom of Great Britain and Northern Ireland<br>(the) | de los Reyes, José Manuel<br>Researcher in Animal Ecology<br>University of Barcelona<br>Spain                                                       |
| De Luca, Daniela<br>Technical Adviser<br>Wildlife Conservation Society (WCS)<br>Tanzania, United Republic of           | de Lucas Herguedas, Ana I<br>PhD in Conservation and Sustainable Forest Management<br>Spain                                                        | de Luis, Martin<br>Associate Professor in Geography<br>University of Zaragoza<br>Spain                                                              |

|                                                                                                                                                 |                                                                                                                                        |                                                                                                                                                 |
|-------------------------------------------------------------------------------------------------------------------------------------------------|----------------------------------------------------------------------------------------------------------------------------------------|-------------------------------------------------------------------------------------------------------------------------------------------------|
| de Luna, Ana Gabriela<br>Founder<br>Fundacion Proyecto Primates<br>Colombia                                                                     | De Marco, Paulo<br>Associate Professor<br>Universidade Federal de Goiás<br>Brazil                                                      | De Maria, Carmelo<br>Assistant Professor in Bioengineering<br>University of Pisa<br>Italy                                                       |
| de Marsily, Ghislain<br>Professor of Hydrology<br>Member, French Academy of Sciences, US National<br>Academy of Engineering<br>France           | De Marzo, Teresa Rita<br>PhD student<br>Humboldt University of Berlin<br>Germany                                                       | De Mas Castroverde, Eva<br>Biologist<br>EEZA, CSIC<br>Spain                                                                                     |
| De Meester, Nele<br>Postdoc Marine Biology<br>Ghent University<br>Belgium                                                                       | de Mello, Rodrigo<br>Professor / Evolutionary Biology, Vertebrate Diversity,<br>Ecology<br>Universidade Católica de Brasília<br>Brazil | de Melo Ramos, Marcos Paulo<br>PhD Student<br>Universidade Federal do Rio de Janeiro<br>Brazil                                                  |
| de Mendonça, Sarah<br>Oceanography Graduate Student<br>Dalhousie University<br>Canada                                                           | de Miguel, Juan Jose<br>Associate Professor, Condensed Matter Physics<br>University Autonoma de Madrid<br>Spain                        | de Mora, Lee<br>Marine Ecosystem Modeller<br>Plymouth Marine Laboratory<br>United Kingdom of Great Britain and Northern Ireland<br>(the)        |
| de Moura Bubadué, Jamile<br>PhD Student<br>Programa de Pós-Graduação em Biodiversidade Animal,<br>Universidade Federal de Santa Maria<br>Brazil | De Neve, Stefaan<br>Soil fertility and nutrient management<br>Ghent University (UGent)<br>Belgium                                      | De Nobili, Maria<br>Full professor Soil Science<br>University of Udine<br>Italy                                                                 |
| de Oliveira, Leandro Francisco<br>Postdoctoral in Botany<br>University of São Paulo<br>Brazil                                                   | de Oliveira, Sylvia<br>Research fellow Biodiversity Discovery<br>Naturalis Biodiversity Center<br>Netherlands (the)                    | de Oliveira Bredariol, Tomás<br>Environmental Engineer<br>Instituto Brasileiro do Meio Ambiente e dos Recursos<br>Naturais Renováveis<br>Brazil |
| de Oliveira Pastore, Heloise<br>University professor of Chemistry<br>University of Campinas<br>Brazil                                           | De Palmas, Stephane<br>PhD candidate<br>Academia Sinica, Biodiversity Research Center<br>Taiwan                                        | de Paula, Jonas<br>Professor of Psychology<br>Faculdade de Ciências Médicas de Minas Gerais<br>Brazil                                           |
| de Paula, Thiago<br>Assistant Professor<br>Rio de Janeiro State University<br>Brazil                                                            | de Paula Couto, Maria Clara<br>Brazil                                                                                                  | de Paula-Souza, Juliana<br>Professor, Plant Systematics<br>Universidade Federal de São João del Rei<br>Brazil                                   |

|                                                                                                                                                     |                                                                                                                                                                                                      |                                                                                                                                             |
|-----------------------------------------------------------------------------------------------------------------------------------------------------|------------------------------------------------------------------------------------------------------------------------------------------------------------------------------------------------------|---------------------------------------------------------------------------------------------------------------------------------------------|
| De Piazzi, Mathew<br>Trainee pathologist<br>Psthwest QEII<br>Australia                                                                              | de Pous, Philip<br>PhD Ecology<br>aridlife<br>Netherlands (the)                                                                                                                                      | de Queiroz, Kevin<br>Research Zoologist<br>National Museum of Natural History, Smithsonian<br>Institution<br>United States of America (the) |
| de Rezende, Julia R.<br>Research Fellow, Geomicrobiology<br>Heriot-Watt University<br>United Kingdom of Great Britain and Northern Ireland<br>(the) | de Rijke, Hugo<br>Associate Professor in Law<br>Plymouth University<br>United Kingdom of Great Britain and Northern Ireland<br>(the)                                                                 | de Setta, Nathalia<br>Professor - Comparative Genomics<br>UFABC<br>Brazil                                                                   |
| de Silva, Shermin<br>Biologist<br>Trunks & Leaves Inc.<br>United States of America (the)                                                            | De Smet, Bart<br>Post-doc Marine Biology<br>Ghent University<br>Belgium                                                                                                                              | de Souza Alves, Caio Cesar<br>Professor Immunology<br>Universidade Federal dos Vales do Jequitinhonha e<br>Mucuri<br>Brazil                 |
| De Stadler, Janet<br>Medical doctor<br>City of Cape Town<br>South Africa                                                                            | de Tezanos Pinto, Paula<br>Biologist<br>CONICET<br>Argentina                                                                                                                                         | de Thoisy, Benoit<br>health ecology / conservation<br>Institut Pasteur de la Guyane / Kwata NGO<br>French Guiana                            |
| de Vera, Jean-Pierre Paul<br>Head of Astrobiological Laboratories, Institute of<br>Planetary Research<br>German Aerospace Center (DLR)<br>Germany   | de Vogel, Eduard<br>Retired, former Conservator of Orchids,<br>NationalHerbarium The Netherlands<br>Naturalis Biodiversity Center, Hortus botanicus Leiden.<br>Guest Researcher<br>Netherlands (the) | De Vriendt, Laurent<br>Ph.D Candidate in Biology<br>Laval University<br>Canada                                                              |
| DE VRIENDT, XAVIER<br>psychiatrist<br>Clinique des Ponts, Lévis, Qc, Canada<br>Canada                                                               | De Vries, Andries Jan<br>PhD student<br>Max Planck Institute for Chemistry<br>Netherlands (the)                                                                                                      | De Wandeler, Hans<br>PhD student<br>KU Leuven<br>Belgium                                                                                    |
| de Wergifosse, Louis<br>PhD student<br>ELI - UCL<br>Belgium                                                                                         | De Wit, Pierre<br>Researcher, Marine Biology<br>University of Gothenburg<br>Sweden                                                                                                                   | Deacon, Amy<br>Lecturer in Zoology<br>The University of the West Indies<br>Trinidad and Tobago                                              |
| DeAmicis, Stacey<br>Lecturer in Marine Ecology<br>University of Plymouth<br>United Kingdom of Great Britain and Northern Ireland<br>(the)           | Dean, Samantha<br>Wildlife Biology/Herpetology<br>Maryland Department of Natural Resources, Wildlife &<br>Heritage Service<br>United States of America (the)                                         | DeAngelis, Kristen<br>Assistant Professor of Microbiology<br>University of Massachusetts Amherst<br>United States of America (the)          |

|                                                                                                                            |                                                                                                                                                                                 |                                                                                                                                          |
|----------------------------------------------------------------------------------------------------------------------------|---------------------------------------------------------------------------------------------------------------------------------------------------------------------------------|------------------------------------------------------------------------------------------------------------------------------------------|
| Deans, Aaron<br>RPBio<br>Allan Brooks Nature Centre<br>Canada                                                              | Dearden, Amber<br>Environmental scientist<br>Australia                                                                                                                          | Deaton Haynes, Raelynn<br>Biology Professor<br>St. Edward's University<br>United States of America (the)                                 |
| Debén García, Sofía<br>PhD Student Ecology<br>University of Santiago de Compostela<br>Spain                                | Debus, Stephen<br>Ecologist<br>University of New England<br>Australia                                                                                                           | Decaens, Thibaud<br>Full Professor<br>Centre d'Ecologie Fonctionnelle et Evolutive UMR 5175<br>CNRS, University of Montpellier<br>France |
| Dechaume-Moncharmont, Francois-Xavier<br>Assistant professor in ecology<br>université de Bourgogne Franche-Comte<br>France | Decher, Jan<br>Zoologist<br>Zoologisches Forschungsmuseum A. Koenig<br>Germany                                                                                                  | Dechoum, Michele<br>Post doc researcher<br>Federal University of Santa Catarina<br>Brazil                                                |
| Deckmyn, Gaby<br>Post-doc<br>university of Antwerpen<br>Belgium                                                            | Deconinck, Frederik<br>Belgium                                                                                                                                                  | Dedeine, Franck<br>Assistant Professor in Evolutionary Ecology<br>University of Tours<br>France                                          |
| Deeg, Christoph<br>PhD candidate Microbiology<br>University of British Columbia<br>Canada                                  | Deeley, Dr David<br>Ecologist<br>Acacia Springs Environmental consulting<br>Australia                                                                                           | Deere, Jacques<br>Postdoctoral researcher<br>University of Amsterdam<br>Netherlands (the)                                                |
| Dees, Tricia<br>president<br>Animal Behavior Management Alliance<br>United States of America (the)                         | Defarge, Nicolas<br>PostDoctoral Researcher<br>ETH Zürich<br>Switzerland                                                                                                        | Degeling, Chris<br>Research Fellow, Sydney Health Ethics<br>University of Sydney<br>Australia                                            |
| Degen, Anna<br>PhD student<br>University of Heidelberg<br>Germany                                                          | Deguines, Nicolas<br>Research fellow in Ecology<br>France                                                                                                                       | Dehalt, Annette<br>Marine Ecologist; Instructor: Biology/Environmental<br>Technology<br>Camosun College<br>Canada                        |
| Dehghani, Cirous<br>Postdoctoral Fellow<br>CSIRO<br>Australia                                                              | Dehnen-Schmutz, Katharina<br>Ecologist<br>Centre for Agroecology, Water and Resilience, Coventry<br>University<br>United Kingdom of Great Britain and Northern Ireland<br>(the) | Dehnhard, Nina<br>post-doctoral researcher<br>University of Antwerp<br>Belgium                                                           |
| Deignan, Lindsey<br>Research Fellow<br>Nanyang Technological University<br>Singapore                                       | Deiss, Isabela<br>Analista Ambiental<br>ICMBio<br>Brazil                                                                                                                        | Deith, Mairin<br>Graduate student, Zoology<br>University of British Columbia<br>Canada                                                   |

|                                                                                                                                        |                                                                                                                 |                                                                                                                               |
|----------------------------------------------------------------------------------------------------------------------------------------|-----------------------------------------------------------------------------------------------------------------|-------------------------------------------------------------------------------------------------------------------------------|
| DEJOUX, Claude<br>Research Director in aquatic Biology<br>IRD ( Research Institute for Development )<br>France                         | Dekker, Jurre<br>BSc Biology<br>Utrecht University<br>Netherlands (the)                                         | Dekker, René<br>Senior Scientist Ornithology<br>Naturalis Biodiversity Center<br>Netherlands (the)                            |
| del Campo, Eva<br>Professor/Plant Physiology<br>Universidad de Alcalá<br>Spain                                                         | Del Piero, Donatella<br>Fisheries Lecturer<br>Trieste University<br>Italy                                       | Del Rio, Cedric<br>PhD student<br>Muséum national d'histoire naturelle<br>France                                              |
| Del Toro Orozco, Wezddy<br>Researcher<br>Mamirauá Sustainable Development Institute<br>Brazil                                          | del Valle Reboul, Elena<br>Physics researcher, Ramón y Cajal<br>Universidad Autónoma de Madrid<br>Spain         | Delabie, Jacques<br>Professor, Biogeography<br>Universidade Estadual de Santa Cruz<br>Brazil                                  |
| Delahaye, Timur<br>PhD in Physics<br>Sweden                                                                                            | Delaney, David<br>Owner (Ph.D.)<br>Delaney Aquatic Consulting<br>United States of America (the)                 | Delaney, Kathleen<br>Wildlife Ecologist<br>Santa Monica Mountains NRA/National Park Service<br>United States of America (the) |
| Délano-Frier, John Paul<br>Research Professor<br>Centro de Investigación y de Estudios Avanzados del IPN,<br>Unidad Irapuato<br>Mexico | Delaunay, Mathilde<br>Muséum national d'Histoire naturelle, Paris<br>France                                     | Delaye Arredondo, Luis Jose<br>Professor in Molecular Evolution<br>Cinvestav Irapuato<br>Mexico                               |
| DEL-CLARO, Kleber<br>Director of Research / General Ecology<br>Universidade Federal de Uberlandia - UFU<br>Brazil                      | Delcourt, Rafael<br>Postdoctoral researcher<br>Trinity College Dublin<br>Ireland                                | Delehanty, Lorrie<br>Department of Pathology<br>University of Virginia School of Medicine<br>United States of America (the)   |
| Delfini, Carolina<br>Universidade Estadual de Campinas (UNICAMP)<br>Brazil                                                             | Delforge, Pierre<br>Orchidology<br>IUCN<br>Belgium                                                              | Delgadillo-Moya, Claudio<br>Researcher in Botany<br>Universidad Nacional Autónoma de México<br>Mexico                         |
| Delgado, Juan A.<br>Associate professor<br>Universidad Complutense de Madrid<br>Spain                                                  | Delgado, Rosario<br>Professor of the Department of Mathematics<br>University Autonomous of Barcelona<br>Spain   | Delgado-Correal, Camilo<br>Erasmus Mundus Joint Doctorates Student<br>University of Ferrara-IRAP<br>Italy                     |
| Delgado-Fernández, Mariana<br>Doctorate student / Plant ecology<br>Centro de Investigaciones Biológicas del Noroeste<br>Mexico         | Delgado-Salinas, Alfonso<br>Investigador/Plant Systematics<br>Universidad Nacional Autónoma de México<br>Mexico | D'Elia, Guillermo<br>Professor<br>Universidad Austral de Chile<br>Chile                                                       |
| D'Elia, Julio<br>Intyernational Development Cooperation<br>D'Elia<br>Brazil                                                            | Delisle, Zackary<br>GAR--Ecological Herpetology<br>Texas A&M Commerce<br>United States of America (the)         | Delissio, Lisa *<br>Professor of Biology<br>Salem State University<br>United States of America (the)                          |



|                                                                                                     |                                                                                                                                                  |                                                                                                                              |
|-----------------------------------------------------------------------------------------------------|--------------------------------------------------------------------------------------------------------------------------------------------------|------------------------------------------------------------------------------------------------------------------------------|
| Delitti Carvalho, Welington Braz<br>Professor Senior / ecology<br>University of São Paulo<br>Brazil | Delius, Bryan<br>Research Assistant in the Department of Integrative<br>Biology<br>University of South Florida<br>United States of America (the) | Dell, Anthony<br>Research Scientist<br>National Great Rivers Research and Education Center<br>United States of America (the) |
| Dell, Bernard<br>Professor and Research Director<br>Murdoch University<br>Australia                 | Della Vedova, Nestor<br>Lic. en sistemas<br>Argentina                                                                                            | Della Volpe, Claudio<br>Associated Professors of Applied Physical Chemistry<br>Università di Trento<br>Italy                 |
| Dellape, Pablo M.<br>Researcher<br>Museo de La Plata- CONICET<br>Argentina                          | DellaSala, Dominick<br>Geos Institute<br>United States of America (the)                                                                          | Dellatore, David<br>Programme Manager - Sumatran Orangutan<br>Conservation Programme<br>PanEco Foundation<br>Indonesia       |
| Dellavalle, Sergio<br>Professot of Public Law and State Theory<br>University of Turin<br>Italy      | Dellinger, Justin<br>Wildlife Researcher<br>California Department of Fish and Wildlife<br>United States of America (the)                         | Delmas, Eva<br>PhD candidate<br>Université de Montréal<br>Canada                                                             |
| Delnatte, César<br>Botanist<br>Martinique                                                           | Delord, Julien<br>Philosophy<br>Université Toulouse Jean Jaurès<br>France                                                                        | Delpierre, Nicolas<br>Assistant professor<br>Université Paris-Sud<br>France                                                  |
| Delroisse, Jérôme<br>Postdoctoral Researcher<br>University of Mons<br>Belgium                       | DeLuna, Alexander<br>Research Professor<br>Centro de Investigación y de Estudios Avanzados del IPN<br>Mexico                                     | DeLuycker, Anneke<br>Assistant Professor<br>Smithsonian-Mason School of Conservation<br>United States of America (the)       |
| Délye, Christophe<br>Plant molecular biologist<br>INRA<br>France                                    | DeMalach, Niv<br>Plant ecology<br>The Hebrew University of Jerusalem<br>Israel                                                                   | Demarmels, Juerg<br>professor<br>Universidad Central de Venezuela<br>Venezuela (Bolivarian Republic of)                      |
| demarre, gaelle<br>researcher in biology<br>College de France<br>France                             | DeMartini, Edward<br>Adjunct Professor<br>University of Hawaii, Hawaii Institute of Marine Biology<br>United States of America (the)             | DeMay, Stephanie<br>Wildlife Biology<br>Virginia Tech<br>United States of America (the)                                      |
| Demené, Arthur<br>Phd thesis<br>INRA Pierroton<br>France                                            | Demers, Marie-Claire<br>Marine Ecology and Human Disturbance<br>University of Wollongong<br>Australia                                            | Demetrio, Guilherme<br>PhD./Ecology<br>Federal University of Lavras<br>Brazil                                                |

|                                                                                                                              |                                                                                                                                                                  |                                                                                                                                                         |
|------------------------------------------------------------------------------------------------------------------------------|------------------------------------------------------------------------------------------------------------------------------------------------------------------|---------------------------------------------------------------------------------------------------------------------------------------------------------|
| Demirkoz, M. Bilge<br>Assoc. Prof. of Physics<br>Middle East Technical University<br>Turkey                                  | Demite, Peterson *<br>UFAM<br>Brazil                                                                                                                             | Demmery, Thomas<br>Masters of Research candidate, Biology<br>Macquarie University<br>Australia                                                          |
| Demol, Miro<br>PhD researcher, Forestry<br>Ghent University<br>Belgium                                                       | Den Uyl, Paul<br>Marine Microbial Genomics Research Associate<br>University of Hawaii<br>United States of America (the)                                          | Dengler, Jürgen<br>Senior Lecturer in Plant Ecology<br>University of Bayreuth<br>Germany                                                                |
| Denkinger, Judith<br>Marine Ecology<br>University San Francisco de Quito<br>Ecuador                                          | Denley, Danielle<br>PhD candidate, Oceanography<br>Dalhousie University<br>Canada                                                                                | Denman, Brian<br>Senior Lecturer<br>University of New England<br>Australia                                                                              |
| Denna, Ma Cristine Faye<br>Environmental Science<br>Institute of Environmental Science and Meteorology<br>Philippines (the)  | Dennert, Allison<br>Master's student in Biology<br>Simon Fraser University<br>Canada                                                                             | Denning, Rodney<br>Utility Forester<br>ArborMetrics Solutions LLC - Ashplund Tree Expert Co.<br>United States of America (the)                          |
| Dennis, Richard<br>Technical translator<br>Self-employed<br>Germany                                                          | Denny, Ellen<br>Ecologist<br>United States of America (the)                                                                                                      | Denoël, Mathieu<br>Senior Research Associate in ecology<br>Fonds de la Recherche Scientifique - FNRS and University<br>of Liège<br>Belgium              |
| Densing, Eva<br>M.Sc. Student Biological Diversity, Ecology and Evolution<br>Georg-August-University of Göttingen<br>Germany | Dent, Daisy<br>Lecturer Tropical Ecology<br>University of Stirling<br>United Kingdom of Great Britain and Northern Ireland<br>(the)                              | Dent, Mark<br>Manager<br>International Alliance for Water Stewardship<br>South Africa                                                                   |
| Dent, Valerie<br>United States of America (the)                                                                              | Depaulis, Frantz<br>researcher<br>CNRS<br>France                                                                                                                 | Derbyshire, Ellen<br>Quantum information theory PhD student<br>University of Edinburgh<br>United Kingdom of Great Britain and Northern Ireland<br>(the) |
| Derbyshire, Mark<br>Research associate in genomics of agricultural diseases<br>Curtin University<br>Australia                | Derbyshire, Samuel<br>PhD student Archaeology<br>Institute of Archaeology, University of Oxford<br>United Kingdom of Great Britain and Northern Ireland<br>(the) | Derhe, Mia<br>Biodiversity Research Manager<br>Dian Fossey Gorilla Fund International<br>United Kingdom of Great Britain and Northern Ireland<br>(the)  |

|                                                                                                                                                   |                                                                                                                                                                          |                                                                                                                       |
|---------------------------------------------------------------------------------------------------------------------------------------------------|--------------------------------------------------------------------------------------------------------------------------------------------------------------------------|-----------------------------------------------------------------------------------------------------------------------|
| Derka, Tomáš<br>associate professor/ecology<br>Department of Ecology, Faculty of Natural Sciences,<br>Comenius University, Bratislava<br>Slovakia | Dermit, Maria<br>Postdoc, proteomics<br>Barts Cancer Institute, London<br>United Kingdom of Great Britain and Northern Ireland<br>(the)                                  | dernotte, Jeremie<br>Research Engineer<br>United States of America (the)                                              |
| Desagher, Solange<br>Research scientist in cell biology<br>CNRS<br>France                                                                         | Desai, Mahomed<br>Senior Researcher and PhD candidate - Freshwater<br>Ecologist<br>Aquatic Ecosystem Research Programme - University of<br>KwaZulu-Natal<br>South Africa | Desbiolles, Jack<br>Agricultural Research Engineer<br>University of South Australia<br>Australia                      |
| Descamps, Charlotte<br>PhD student<br>Earth and Life Institute, Université catholique de Louvain<br>Belgium                                       | Descamps, Sébastien<br>Research scientist<br>Norwegian Polar Institute<br>Norway                                                                                         | Deschepper, Pablo<br>Evolutionary ecologist<br>KU Leuven<br>Belgium                                                   |
| Deshayes, Julie<br>oceanographer<br>CNRS<br>France                                                                                                | Desiderato, Andrea<br>PhD candidate of Zoology<br>Federal University of Paraná<br>Brazil                                                                                 | Désiré, Akonkwa<br>Professor/ Hydrobiology<br>Official University of Bukavu<br>Congo (the Democratic Republic of the) |
| Deslauriers, Amber<br>Masters in Ecology and Evolution<br>UC Irvine<br>United States of America (the)                                             | DeSoto, Lucía<br>Postdoctoral researcher<br>Centre for Functional Ecology. University of Coimbra<br>Portugal                                                             | DeSouza, Sunita<br>Neuroscience<br>New York University<br>United States of America (the)                              |
| Despres, Laurence<br>Professor<br>Université Grenoble Alpes<br>France                                                                             | Desvars-Larrive, Amélie<br>Postdoc, epidemiology<br>University of Veterinary Medicine Vienna<br>Austria                                                                  | Desvaux, Martin<br>Retired Physicist<br>n/a<br>United Kingdom of Great Britain and Northern Ireland<br>(the)          |
| Desvignes, Thomas<br>Research Associate in Biology<br>University of Oregon<br>United States of America (the)                                      | Dettogni Guariento, Rafael *<br>Professor<br>Federal University of Mato Grosso do Sul<br>Brazil                                                                          | Deufel, Alexandra<br>Professor of Biology<br>Minot State University<br>United States of America (the)                 |
| Deuster, Paul R.<br>Ph.D. Economics<br>United States of America (the)                                                                             | Deutsch, Andrew<br>Technical Writer<br>Home Office, Sviva Tova<br>Israel                                                                                                 | DeVantier, Lyndon<br>Coral reef ecologist<br>Coral Reef Research<br>Australia                                         |
| Devarajan, Kadambari<br>PhD Student<br>University of Massachusetts at Amherst<br>United States of America (the)                                   | Devillers, Pierre<br>Conservation Biology<br>RBINS<br>Belgium                                                                                                            | Devine, Carol<br>MSc Social Scientist<br>Canada                                                                       |

|                                                                                                                                                                                                                |                                                                                                                               |                                                                                                                            |
|----------------------------------------------------------------------------------------------------------------------------------------------------------------------------------------------------------------|-------------------------------------------------------------------------------------------------------------------------------|----------------------------------------------------------------------------------------------------------------------------|
| Devitt, Dale<br>Professor Soil and Water<br>School of Life Sciences, Univ. Nevada Las Vegas<br>United States of America (the)                                                                                  | Devitt, Tom<br>Research Fellow<br>Biodiversity Institute, the University of Texas at Austin<br>United States of America (the) | Devlin, Allison<br>Post-Doctoral Associate   Ph.D. Candidate<br>Panthera   SUNY ESF<br>United States of America (the)      |
| Devlin-Kelly, Inez *<br>Professor Emerita of Biology<br>Bakersfield College<br>United States of America (the)                                                                                                  | Devloo, Philippe<br>Full Professor - Structural Engineering<br>UNICAMP<br>Brazil                                              | DeVore, Melanie<br>Plant Biology<br>Georgia College<br>United States of America (the)                                      |
| Devrnja, Nina<br>Institute for Biological Research "Sinisa Stankovic",<br>Belgrade<br>Serbia                                                                                                                   | DeWan, Amielle<br>Executive Director<br>Impact by Design<br>United States of America (the)                                    | DeWaters, Jan<br>Assistant Professor, Engineering<br>Clarkson University<br>United States of America (the)                 |
| Dexter, Eric<br>Ph.D. Candidate in Environmental Science<br>Washinton State University<br>United States of America (the)                                                                                       | Deziderio Santana, Lucas<br>PhD Student<br>Universidade Federal de Lavras<br>Brazil                                           | Dhankher, Om Parkash<br>Professor<br>University of Massachusetts Amherst<br>United States of America (the)                 |
| Dhar, Avinash<br>Professor of Physics<br>International Centre for Theoretical Sciences, Bangalore<br>India                                                                                                     | Dheer, Arjun<br>United States of America (the)                                                                                | Dhendup, Tashi<br>Forestry Officer<br>Ugyen Wangchuck Institute for Conservation and<br>Environmental Research<br>Bhutan   |
| DERMAIN, FRANK<br>PRESIDENT, DVM<br>GECM (MEDITERRANEAN CETACEAN STUDY GROUP)<br>France                                                                                                                        | Di Domenico, Maikon<br>Professor, Biological Oceanography<br>Federal University of Paraná<br>Brazil                           | Di Fiore, Anthony<br>Professor, Biological Anthropology<br>University of Texas at Austin<br>United States of America (the) |
| Di Giacomo, Adrián S.<br>Researcher, Ornithology & Conservation Biology<br>Laboratorio de Biología de la Conservación, Centro de<br>Ecología Aplicada del Litoral (CECOAL-CONICET),<br>Corrientes<br>Argentina | di Porcia e Brugnera, Manfredo<br>Phd student<br>Gent University<br>Belgium                                                   | Diana, Zoie<br>United States of America (the)                                                                              |
| Diane, BALA<br>Scientist: ecologist<br>University of Dschang<br>Cameroon                                                                                                                                       | Dias, Ana<br>Portugal                                                                                                         | Dias, Ana Carolina E.<br>PhD candidate<br>University of Waterloo<br>Canada                                                 |

|                                                                                                                                                                      |                                                                                                                                              |                                                                                                                                                              |
|----------------------------------------------------------------------------------------------------------------------------------------------------------------------|----------------------------------------------------------------------------------------------------------------------------------------------|--------------------------------------------------------------------------------------------------------------------------------------------------------------|
| Dias, Gustavo<br>Assistant Professor/Ecology<br>Federal University of ABC<br>Brazil                                                                                  | Dias, Murilo<br>Professor / Aquatic and Community Ecology<br>Departamento de Ecologia, Universidade de Brasília (UnB)<br>Brazil              | Dias de Aguiar, Olivia Beatriz Moraes<br>Master student in Science of Tropical Forest<br>National Institute of Amazonia Research<br>Brazil                   |
| Dias Guilardi, Mariana<br>Biologist<br>Instituto Butantan<br>Brazil                                                                                                  | Dias Passos, Flávio<br>Full Professor<br>Universidade Estadual de Campinas<br>Brazil                                                         | Díaz, Mario<br>Researcher/Natural Resources<br>Spanish Research Council (CSIC)<br>Spain                                                                      |
| Díaz, Nicolás<br>Student<br>Universidad Nacional Autónoma de México<br>Mexico                                                                                        | Diaz-Almeyda, Erika<br>Postdoctoral Fellow<br>Emory University<br>United States of America (the)                                             | Díaz-Delgado, Ricardo<br>Head of Remote Sensing & GIS Lab. Remote Sensing<br>Ecological Applications<br>Estación Biológica de Doñana-CSIC<br>Spain           |
| Diazgranados, Mauricio<br>Research Leader - Diversity and Livelihoods<br>Royal Botanic Gardens, Kew<br>United Kingdom of Great Britain and Northern Ireland<br>(the) | Díaz-Guerra, Margarita<br>Staff Scientist/Neuroscience<br>Biomedical Research Institute/Spanish Research Council<br>(IIBM/CSIC-UAM)<br>Spain | Díaz-Nido, Javier<br>Associate Professor / Biomedicine<br>Universidad Autónoma de Madrid<br>Spain                                                            |
| Díaz-Nieto, Juan Fernando<br>Assistant Profesor<br>Universidad EAFIT<br>Colombia                                                                                     | Diaz-Pulido, Angélica<br>Instituto de Investigación de Recursos Biológicos<br>Alexander von Humboldt<br>Colombia                             | DIAZ-SIERRA, RUBEN<br>ASSOCIATE PROFESSOR - Depart of Mathematical Physics<br>and Fluids<br>UNIVERSIDAD NACIONAL DE EDUCACIÓN A DISTANCIA -<br>UNED<br>Spain |
| Díaz-Varela, Emilio<br>Associate Professor<br>University of Santiago de Compostela<br>Spain                                                                          | Dib, Viviane<br>Ecology<br>Federal University of Rio de Janeiro<br>Brazil                                                                    | Dibar, Dagne Tafa *<br>Lecturer<br>Arba Minch University<br>Ethiopia                                                                                         |
| DiBattista, Joseph<br>Early Career Research Fellow<br>Curtin University<br>Australia                                                                                 | Dick, Katelyn<br>Seed testing technician<br>BC Tree Seed Centre<br>Canada                                                                    | Dickens, Jeremy<br>Scientific Director & Museum Curator<br>Fundación Para la Tierra<br>Paraguay                                                              |
| Dickey, Matthew<br>Masters candidate<br>University of kwaZulu-Natal<br>South Africa                                                                                  | Dickinson, Dawn<br>PhD student<br>The University of Western Australia<br>Australia                                                           | Dickinson, Janis<br>Professor of Natural Resources<br>Cornell University<br>United States of America (the)                                                   |

|                                                                                                                                                             |                                                                                                                                                                          |                                                                                                                                                                                  |
|-------------------------------------------------------------------------------------------------------------------------------------------------------------|--------------------------------------------------------------------------------------------------------------------------------------------------------------------------|----------------------------------------------------------------------------------------------------------------------------------------------------------------------------------|
| Dickinson-Bannack, Federico H.<br>Titular researcher on Human Ecology<br>Cinvestav-Merida<br>Mexico                                                         | Dickman, Amy<br>Kaplan Senior Research Fellow in Wild Cat Conservation<br>WildCRU, University of Oxford<br>United Kingdom of Great Britain and Northern Ireland<br>(the) | Dickman, Christopher<br>Professor in Ecology<br>The University of Sydney<br>Australia                                                                                            |
| Dickson, Catherine<br>PhD Candidate, Biological Sciences<br>Monash University<br>Australia                                                                  | Dickson, Juleen<br>PhD Candidate<br>University of Wisconsin Milwaukee<br>United States of America (the)                                                                  | Dickson, Timothy<br>Assistant Professor<br>United States of America (the)                                                                                                        |
| Didier, David<br>Coastal morphodynamics<br>Canada                                                                                                           | Didziocas de Paula Freitas, Carina<br>Bióloga / Monitor Ambiental<br>BK / Fundação Florestal<br>Brazil                                                                   | Diedericks, Gerhard<br>Aquatic Ecology<br>Private Consultant<br>South Africa                                                                                                     |
| Diehl, Doerte<br>Scientist<br>University Koblenz-Landau<br>Germany                                                                                          | Diehl, Sebastian<br>Professor of Ecology<br>Umea University<br>Sweden                                                                                                    | Diehm, Christian<br>Associate Professor of Philosophy and Environmental<br>Ethics Program Coordinator<br>University of Wisconsin-Stevens Point<br>United States of America (the) |
| Diels, Jan<br>Associate Professor, Soil Hydrology<br>KU leuven<br>Belgium                                                                                   | Dierickx, Elisa<br>PhD<br>University of Cambridge<br>United Kingdom of Great Britain and Northern Ireland<br>(the)                                                       | Dierking, Jan<br>Marine Ecologist<br>GEOMAR Helmholtz Centre for Ocean Research Kiel<br>Germany                                                                                  |
| Dieterich, Martin<br>Professor Conservation Biology<br>Institute for Landscape Ecology and Vegetation Science<br>University of Hohenheim Germany<br>Germany | Dietrich, Jan<br>Associate Professor<br>Aarhus University<br>Denmark                                                                                                     | Dietterich, Thomas<br>Professor (Emeritus)<br>Oregon State University<br>United States of America (the)                                                                          |
| Dietzel, Andreas<br>PhD candidate<br>ARC Centre of Excellence for Coral Reef Studies, James<br>Cook University<br>Australia                                 | Diez, Catalina<br>Oceanography<br>Universidad de Vigo<br>Spain                                                                                                           | Díez, Joserra<br>Senior Professor<br>University of the Basque Country<br>Spain                                                                                                   |
| Diez de Revenga, Emilio<br>Ex-associate professor of environmental assessment<br>University of Murcia<br>Spain                                              | Dignac, Marie-France<br>Researcher, organic geochemistry<br>INRA<br>France                                                                                               | Dijkstra, Klaas-Douwe B.<br>researcher<br>Naturalis Biodiversity Center<br>Netherlands (the)                                                                                     |

|                                                                                                                                                    |                                                                                                                                |                                                                                                                                 |
|----------------------------------------------------------------------------------------------------------------------------------------------------|--------------------------------------------------------------------------------------------------------------------------------|---------------------------------------------------------------------------------------------------------------------------------|
| Dill, Lawrence<br>Professor Emeritus, Ecology<br>Simon Fraser University<br>Canada                                                                 | Dillenberger, Markus<br>Postdoc<br>Germany                                                                                     | Dillon, Erin<br>PhD Student<br>UC Santa Barbara<br>United States of America (the)                                               |
| Dillon, Whalen<br>Postdoctoral Research Associate/Ecology<br>University of Florida<br>United States of America (the)                               | Diment, Alex<br>Senior Technical Advisor<br>Wildlife Conservation Society<br>Myanmar                                           | Dimond, James<br>PhD student<br>University of Washington<br>United States of America (the)                                      |
| Dimopoulos, Panayotis<br>Professor in Botany and Ecology<br>University of Patras, Department of Biology<br>Greece                                  | Dines, Jim<br>Evolutionary Biology/Mammalogy<br>Natural History Museum of Los Angeles County<br>United States of America (the) | Ding, Pisheng<br>Assistant Professor of Mathematics<br>Illinois State University<br>United States of America (the)              |
| DING, Tzung-Su<br>Associate Professor<br>National Taiwan University<br>Taiwan                                                                      | Dinkins, Barbara<br>President<br>Dinkins Biological Consulting, LLC<br>United States of America (the)                          | Dinoi, Alessia *<br>PhD in Molecular Marine Biology<br>University of Johannesburg<br>South Africa                               |
| Dionisi, Hebe<br>Environmental Microbiology, Biotechnology<br>Center for the Study of Marine Systems (CESIMAR, CCT<br>CONICET-CENPAT)<br>Argentina | DiPoto, Peg<br>Engineering<br>United States of America (the)                                                                   | Dippenaar, Susan<br>Professor<br>University of Limpopo<br>South Africa                                                          |
| dirks, paul<br>Professor and Chair of geology<br>James Cook University<br>Australia                                                                | Dirscherl, Mariel<br>PhD student<br>University of Iceland<br>Iceland                                                           | Dirzo, Rodolfo<br>Professor<br>Stanford University<br>United States of America (the)                                            |
| Discardi, Michele<br>Italy                                                                                                                         | Disconzi, Gislaïne<br>Environmental Science PhD Student<br>Brasília University - UnB<br>Brazil                                 | Disney, Jane<br>Senior Staff Scientist and Director of Education<br>MDI Biological Laboratory<br>United States of America (the) |
| Dissard, Delphine<br>PhD in Marine BioGeoSciences<br>IRD<br>France                                                                                 | DiStefano, Robert<br>Resource Scientist<br>United States of America (the)                                                      | Dittmar, Thorsten<br>Marine Sciences<br>University of Oldenburg<br>Germany                                                      |
| Divay, Julien<br>Postdoctoral Research Associate, Palaeoichthyology<br>Royal Tyrrell Museum of Palaeontology<br>Canada                             | Divino de Araujo, Edilson<br>Associate Professor<br>Federal University of Sergipe<br>Brazil                                    | Diwediga, Badabate<br>Researcher, Landscape Ecology and Sustainable Land Use<br>Systems<br>Togo                                 |

|                                                                                                                                           |                                                                                                                                                       |                                                                                                                                       |
|-------------------------------------------------------------------------------------------------------------------------------------------|-------------------------------------------------------------------------------------------------------------------------------------------------------|---------------------------------------------------------------------------------------------------------------------------------------|
| Dixit, Soham<br>MSc OEP Biology<br>University of Bonn<br>Germany                                                                          | Dixon, Emily<br>Horticulture<br>Oregon State University<br>United States of America (the)                                                             | Dixon, Hugh<br>Ecologist<br>Celtic Ecology<br>United Kingdom of Great Britain and Northern Ireland (the)                              |
| Dixon, Kelly<br>PhD Candidate, ecology<br>Australian National University<br>Australia                                                     | Dixon, Kingsley<br>Professor, Environment and Agriculture<br>Curtin University<br>Australia                                                           | Diz-Munoz, Alba<br>Research Group Leader<br>EMBL<br>Germany                                                                           |
| Djagbletey, Gloria<br>Senior Scientist<br>CSIR-Forestry Research Institute of Ghana<br>Ghana                                              | Djikanović, Vesna *<br>research associate/hydrobiologist<br>Institute for biological research "Siniša Stanković",<br>University of Belgrade<br>Serbia | Djondjorov, Peter<br>Bulgaria                                                                                                         |
| Djordjevic, Brankica<br>PhD in Animal Nutrition and Physiology<br>Djordjevic<br>Norway                                                    | do Amaral, Maria Clara<br>Assistant Professor<br>Mount Saint Joseph University<br>United States of America (the)                                      | do Val, Francisca<br>Evolution of Species<br>Universidade de Sao Paulo<br>Brazil                                                      |
| do Val Simardi Beraldo Souza, Thiago<br>Interdisciplinary Ecology<br>University of Florida<br>Brazil                                      | do Val Vilela, Roberto<br>Public Health Technologist / Evolutionary Biology<br>Fundação Oswaldo Cruz - FIOCRUZ<br>Brazil                              | Dobbs, Cynnaron<br>Postdoctoral Researcher<br>Pontificia Universidad Catolica de Chile<br>Chile                                       |
| DOBIGNY, Gauthier<br>Researcher, Population Biology<br>Institute of Research for Sustainable Development (IRD)<br>France                  | Doble, Rebecca<br>Hydrogeologist<br>Australia                                                                                                         | Dobosz, Paula<br>post-doc<br>Tel Aviv University<br>Israel                                                                            |
| Dobrev, Mariya<br>Research fellow, Life Sciences<br>Imperial College London<br>United Kingdom of Great Britain and Northern Ireland (the) | Dobrin, Michelle<br>Research Assistant, Aquatic Invertebrate<br>Taxonomist/Ecologist<br>University of Windsor<br>Canada                               | Dobrovolski, Ricardo<br>Professor<br>Universidade Federal da Bahia<br>Brazil                                                          |
| Dobson, Andy *<br>Professor<br>Princeton University<br>United States of America (the)                                                     | Dobson, Annise<br>Doctoral Student<br>Cornell University<br>United States of America (the)                                                            | Dobson, Heidi<br>Professor of Biology<br>Whitman College<br>United States of America (the)                                            |
| DOCILE, TATIANA<br>DOCTOR<br>UFRJ<br>Brazil                                                                                               | Dodd, Norris<br>Landscape Connectivity/Transportation Ecology<br>Wildlife Consultant to the Asian Development Bank<br>United States of America (the)  | Dodd, Ros *<br>Research Fellow (Ecosystem science)<br>Bangor University<br>United Kingdom of Great Britain and Northern Ireland (the) |



|                                                                                                                                               |                                                                                                                                  |                                                                                                                             |
|-----------------------------------------------------------------------------------------------------------------------------------------------|----------------------------------------------------------------------------------------------------------------------------------|-----------------------------------------------------------------------------------------------------------------------------|
| Dodds, Walter<br>Professor of Biology<br>Kansas State University<br>United States of America (the)                                            | Dodet, Guillaume<br>France                                                                                                       | Dodhia, Kejal<br>Research Assistant - Agricultural Scientist<br>Curtin University<br>Australia                              |
| Dodkins, Dr. Ian<br>Research Project Manager<br>Swansea University<br>United Kingdom of Great Britain and Northern Ireland (the)              | Dodman, Timothy<br>Associate Expert<br>Wetlands International<br>United Kingdom of Great Britain and Northern Ireland (the)      | Doebeli, Michael<br>Professor<br>University of British Columbia<br>Canada                                                   |
| Doell, Claudia<br>Graduate Student, Biology<br>University of Freiburg<br>Germany                                                              | Doell, Claus<br>Teacher<br>Gymnasium<br>Germany                                                                                  | Doerga, Sabitrie<br>Botanist<br>National Herbarium of Suriname<br>Suriname                                                  |
| Doering-Arjes, Peer<br>Fish Ecology<br>Humboldt Universität Berlin<br>Germany                                                                 | Doerk, Hauke<br>Physics PhD - Referee for Radioactivity<br>Umweltinstitut München e.V.<br>Germany                                | Doherty, Philip<br>PhD in Biosciences<br>University of Exeter<br>United Kingdom of Great Britain and Northern Ireland (the) |
| Dohrmann, Martin<br>Postdoctoral Researcher Evolutionary Biology<br>Ludwig-Maximilians-University Munich<br>Germany                           | Dolan, John<br>Research Director, Biological Oceanography<br>CNRS, Laboratoire D'Océanographie de Villefranche-sur-Mer<br>France | Dolbeault, Matthieu<br>student<br>École Normale Supérieure Ulm<br>France                                                    |
| Dolder, Mary Anne Heidi<br>Professor, Cell Biology<br>Biology Institute<br>Brazil                                                             | Dole, Shrikar<br>Founder and CEO<br>SDG Foundation<br>India                                                                      | Doligez, Blandine<br>Researcher<br>CNRS<br>France                                                                           |
| d'Oliveira Coelho, João<br>DPhil student in Anthropology<br>The University of Oxford<br>Portugal                                              | Dolman, Han<br>Professor of Ecohydrology<br>Department of Earth Sciences, Free University Amsterdam<br>Netherlands (the)         | Dolorosa, Roger<br>Associate Professor/Environmental Science<br>Western Philippines University<br>Philippines (the)         |
| Domanski, Dominik<br>Adjunct Professor, Ph.D., Biochemistry<br>Institute of Biochemistry and Biophysics, Polish Academy of Sciences<br>Poland | Domi, Alba<br>PhD in astroparticle<br>Università degli Studi di Genova<br>Italy                                                  | Domingo, Esteban<br>Professor of Virology<br>Centro de Biología Molecular Severo Ochoa (CSIC-UAM), Madrid<br>Spain          |
| Domingos, Fabricius<br>Lecturer, Evolutionary Biology<br>Universidade do Estado de Mato Grosso<br>Brazil                                      | Domingues, Tomas<br>University professor (Ecology)<br>FFCLRP-USP<br>Brazil                                                       | Dominguez, Eduardo<br>Professor<br>National University of Tucuman<br>Argentina                                              |

|                                                                                                                                                                    |                                                                                                                                                      |                                                                                                                                            |
|--------------------------------------------------------------------------------------------------------------------------------------------------------------------|------------------------------------------------------------------------------------------------------------------------------------------------------|--------------------------------------------------------------------------------------------------------------------------------------------|
| Dominguez, Pablo<br>Senior Researcher, Environmental Anthropology<br>Centre National de la Recherche Scientifique<br>France                                        | Domínguez, Jorge<br>Professor of Zoology<br>University of Vigo<br>Spain                                                                              | Domínguez-Domínguez, Omar<br>Research profesor<br>Universidad Michoacana de San Nicolas de Hidalgo<br>Mexico                               |
| Dominique Angèle, Vuitton<br>Professor emeritus of Clinical Immunology<br>University BOURGOGNE FRANCHE-COMTE<br>France                                             | DOMMANGET, Fanny<br>Researcher in Plant Ecology<br>Irstea - Mountain Ecosystems<br>France                                                            | Doña, Jorge<br>Msc, PhD candidate<br>Estación Biológica de Doñana (CSIC)<br>Spain                                                          |
| Donahue, Debra<br>Law; wildlife biology (law professor emerita)<br>University of Wyoming (emerita)<br>United States of America (the)                               | Donald, Roderick<br>Aquaculture<br>Aqunion<br>South Africa                                                                                           | Donaldson, Dr. Terry<br>Professor of Ichthyology<br>University of Guam Marine Laboratory, Mangilao, Guam<br>United States of America (the) |
| Donaldson-Selby, Gillian<br>Research Scientist: Landscape Visualisation<br>James Hutton Institute<br>United Kingdom of Great Britain and Northern Ireland<br>(the) | DoNascimento, Carlos<br>Curator / Ichthyology<br>Instituto de Investigación de Recursos Biológicos<br>Alexander von Humboldt<br>Colombia             | Donath, Alexander<br>Researcher<br>Zoological Research Museum Alexander Koenig<br>Germany                                                  |
| Donati, Franco<br>PhD Candidate<br>Leiden University, CML Institute of Environmental<br>Sciences<br>Netherlands (the)                                              | Donati, Guilherme<br>Materials Engineer<br>Brazil                                                                                                    | Donertas, Melike<br>PhD Student<br>EMBL-EBI<br>United Kingdom of Great Britain and Northern Ireland<br>(the)                               |
| D'Onghia, Gianfranco<br>Professor of Ecology<br>University of Bari Aldo Moro<br>Italy                                                                              | Donkor, Felix Kwabena<br>Research scientist<br>University of the Witwaterstrand<br>South Africa                                                      | donley, nathan<br>senior scientist<br>center for biological diversity<br>United States of America (the)                                    |
| Donmez, Dogan<br>Professor, Mathematics<br>Cukurova University<br>Turkey                                                                                           | Donnelly, Maureen *<br>Associate Dean of Graduate Studies/Professor of Biology<br>Florida International University<br>United States of America (the) | Donnici, Sandra<br>Research Scientist<br>ISMAR-CNR, Institute of Marine Sciences-Italian National<br>Research Council<br>Italy             |
| Donohue, Ian<br>Associate Professor<br>Trinity College Dublin<br>Ireland                                                                                           | Donoso, David A<br>Assistant Professor<br>Escuela Politécnica Nacional<br>Ecuador                                                                    | Donoso, Pablo<br>Professor of Silviculture<br>Universidad Austral de Chilei<br>Chile                                                       |
| Donovan, Rob<br>Mental health promotion<br>University of Western Australia<br>Australia                                                                            | Dool, Serena<br>Postdoc<br>University of Greifswald<br>Germany                                                                                       | Dooley, James K.<br>Professor of Biology<br>Adelphi University<br>United States of America (the)                                           |

|                                                                                                                         |                                                                                                                                                                     |                                                                                                                                |
|-------------------------------------------------------------------------------------------------------------------------|---------------------------------------------------------------------------------------------------------------------------------------------------------------------|--------------------------------------------------------------------------------------------------------------------------------|
| Doorenweerd, Camiel<br>Junior Researcher Evolutionary Biology<br>University of Hawaii<br>United States of America (the) | Doorman, Frans<br>Rural development sociologist<br>Free-lance<br>Netherlands (the)                                                                                  | dop, marie claude<br>researcher<br>free lance<br>France                                                                        |
| Dorado, Gabriel<br>Professor<br>Technical University of Madrid<br>Spain                                                 | Dordevic, Matthew<br>Cellular & Physiological Sciences<br>University of British Columbia<br>Canada                                                                  | Doré, Thierry<br>Professeur<br>AgroParisTech<br>France                                                                         |
| DOREGO, Gualbert Séraphin *<br>Researcher/Geography/Geomatics<br>ISRA<br>Senegal                                        | Dorey, Catherine<br>Marine Biology<br>Greenpeace<br>Australia                                                                                                       | Doria, Vanessa<br>Bióloga<br>Facultad de Ciencias Exactas y Naturales - Universidad<br>Nacional de Asunción<br>Paraguay        |
| Dormann, Carsten<br>Professor of Biometry & Environmental System Analysis<br>University of Freiburg<br>Germany          | Dorn, Ronald<br>Professor of Geographical Sciences and Urban Planning<br>Arizona State University<br>United States of America (the)                                 | Dornhege, Mareike<br>PhD Candidate Global Environmental Studies<br>Sophia University Tokyo<br>Japan                            |
| Dorothea, Bauch<br>Climate Research<br>GEOMAR, Kiel<br>Germany                                                          | Dorrestein, Annabel<br>Behavioural ecology<br>Netherlands (the)                                                                                                     | dos Anjos Oliveira, Jessica<br>Msc. Ecology<br>Instituto Nacional de Pesquisas da Amazônia - INPA<br>Brazil                    |
| dos Reis de Jesus, Nara Letícia<br>Brazil                                                                               | dos Santos, Alvaro Doria<br>Master's Degree student in Systematics, Animal<br>Taxonomy and Biodiversity<br>Museu de Zoologia da Universidade de São Paulo<br>Brazil | Dos Santos, Andre<br>Associate Professor<br>Federal University of São Carlos<br>Brazil                                         |
| dos Santos Silva, Débora<br>Msc physiology<br>Universidade de São Paulo<br>Brazil                                       | Dosselli, Ryan<br>Postdoctoral researcher, biochemistry<br>University of Western Australia<br>Australia                                                             | Dossier, Julien<br>Expert in carbon neutrality strategies<br>Quattrolibri<br>France                                            |
| Dostal, Carola<br>Doctoral Student<br>University of Bayreuth<br>Germany                                                 | Doten, Kali<br>Conservation Ecologist<br>Oregon State University<br>United States of America (the)                                                                  | DOTTORI, MARCELO<br>Assistant Professor / Physical Oceanography<br>University of Sao Paulo - Oceanographic Institute<br>Brazil |
| Doughty, Chris<br>Assistant Professor of ecosystem ecology<br>NAU<br>United States of America (the)                     | Douine, Maylis<br>medecine<br>Cayenne Hospital, Center of Clinical Investigation, Inserm<br>1424<br>French Guiana                                                   | Doulcier, Guilhem<br>Ecology, Evolution and Applied Mathematics (PhD<br>student)<br>École normale supérieure<br>France         |

|                                                                                                                                                                              |                                                                                                                           |                                                                                                                                                                               |
|------------------------------------------------------------------------------------------------------------------------------------------------------------------------------|---------------------------------------------------------------------------------------------------------------------------|-------------------------------------------------------------------------------------------------------------------------------------------------------------------------------|
| Dourado Batista, Carlos Victor<br>Upperclassman in Ecology<br>Universidade Federal do Rio de Janeiro<br>Brazil                                                               | Doussin, Jean-Francois<br>Professor in Atmospheric Chemistry<br>LISA/University of Paris East Créteil/IPSL/CNRS<br>France | Dovciak, Martin<br>Associate Professor, Plant Ecology & Global Change<br>SUNY College of Environmental Science and Forestry,<br>Syracuse<br>United States of America (the)    |
| Dove, Michael R<br>Margaret K. Musser Professor of Social Ecology<br>Yale University<br>United States of America (the)                                                       | Dow, Leslie<br>Ph.D. Chemistry<br>Leslie Dow Consulting, LLC<br>United States of America (the)                            | Dowell, Anthony<br>Professor of Primary Health Care and General Practice:<br>Head of Department Obstetrics and Gynaecology<br>University of Otago - Wellington<br>New Zealand |
| Downey, Jim<br>Clinical Psychology<br>United Kingdom of Great Britain and Northern Ireland<br>(the)                                                                          | Downey, Rodney<br>Professor of Mathematics<br>Victoria University of Wellington<br>New Zealand                            | Downs, Colleen<br>Professor Zoology<br>University of KwaZulu-Natal<br>South Africa                                                                                            |
| Doyle, Emma<br>Biosciences Laboratory Manager and Behavioural Ecology<br>Researcher<br>University of Exeter<br>United Kingdom of Great Britain and Northern Ireland<br>(the) | Doyle, James<br>Associate Professor of Psychology<br>Worcester Polytechnic Institute<br>United States of America (the)    | Doyle, Paul<br>Hydrotechnical Engineer<br>BC Rivers Consulting Ltd.<br>Canada                                                                                                 |
| Doyle, Rory<br>MSc Geography<br>Swansea University<br>Canada                                                                                                                 | Doyle, Ulrike<br>Ecologist, PhD<br>German Environment Agency<br>Germany                                                   | Dr Bergmann, Desiree<br>Medical Doctor/ GP<br>Germany                                                                                                                         |
| Dr Hendrich, Lars<br>Entomologist, Curator<br>Zoologische Staatssammlung München<br>Germany                                                                                  | Dr. Demandt, Norbert<br>Diabetologist<br>diabetologikum kiel<br>Germany                                                   | Dr. Kelemen, Julia<br>Veterinarian<br>Small animal clinic in Graz, Austria<br>Austria                                                                                         |
| Dr. Naeve, Heiner<br>Marine biologist (Environment)<br>Fisheries Department FAO (ret.)<br>Germany                                                                            | Dr. Pappa, Barbara<br>Germany                                                                                             | DRAINAS, ALEXANDROS PANAGIOTIS<br>EMBL<br>Germany                                                                                                                             |
| Drake, Donald<br>Professor of Botany<br>University of Hawaii<br>United States of America (the)                                                                               | Drake, Jeff<br>Earth and Planetary Science<br>MIT<br>United States of America (the)                                       | Drake, Katharine<br>Student/wildlife guide<br>United Kingdom of Great Britain and Northern Ireland<br>(the)                                                                   |

|                                                                                                                   |                                                                                                                                                  |                                                                                                                                                                                                                                        |
|-------------------------------------------------------------------------------------------------------------------|--------------------------------------------------------------------------------------------------------------------------------------------------|----------------------------------------------------------------------------------------------------------------------------------------------------------------------------------------------------------------------------------------|
| Drakova, Deiana<br>Professor<br>State University of Sofia<br>Bulgaria                                             | Drange, Helge<br>Professor<br>University of Bergen<br>Norway                                                                                     | Draper, David<br>Post-Doc Researcher<br>Centre for Ecology, Evolution and Environmental Changes (CE3C)<br>Portugal                                                                                                                     |
| Draper, Isabel<br>Associate Professor of Botany<br>Faculty of Sciences, Universidad Autónoma de Madrid<br>Spain   | Dreanno, Catherine<br>Researcher<br>France                                                                                                       | Dreber, Niels<br>Ecology Postdoc<br>University of Goettingen<br>Germany                                                                                                                                                                |
| DRECHSEL, Pay<br>Strategic Program Leader<br>International Water Management Institute (IWMI)<br>Sri Lanka         | Drechsler-Santos, Elisandro Ricardo<br>Professor<br>Universidade Federal de Santa Catarina<br>Brazil                                             | Dreher, Theo<br>Professor of Microbiology<br>Oregon State University<br>United States of America (the)                                                                                                                                 |
| Drenthen, Martin<br>Associate Professor environmental philosophy<br>Radboud University<br>Netherlands (the)       | Drewery, Christopher<br>Chemistry<br>United Kingdom of Great Britain and Northern Ireland (the)                                                  | Dreyer, Jessica<br>PhD student of ecology and evolutionary biology<br>University of Tennessee Knoxville<br>United States of America (the)                                                                                              |
| Dreyer, Keith<br>Wildlife biology<br>University of Tennessee<br>United States of America (the)                    | Driemel, Amelie<br>Alfred-Wegener Institute<br>Germany                                                                                           | Driscoll, Don<br>Professor of Terrestrial Ecology, President Ecological Society of Australia<br>Deakin University<br>Australia                                                                                                         |
| Driscoll, Timothy<br>Assistant Professor of Biology<br>West Virginia University<br>United States of America (the) | Drius, Mita<br>Post Doc in Ecology<br>Institute of Marine Sciences - National Research Council<br>Italy                                          | Driver, Jonathan<br>Professor, Department of Archaeology<br>Simon Fraser University<br>Canada                                                                                                                                          |
| Drobniak, Szymon<br>Assistant Professor<br>Jagiellonian University in Krakow<br>Poland                            | Droege, Sam<br>Head of USGS Bee Inventory and Monitoring Lab /<br>Biologist<br>United States Geological Survey<br>United States of America (the) | Droge, Egil<br>Lead tutor Postgraduate Diploma in International Wildlife Conservation Practice<br>Wildlife Conservation Research Unit (WildCRU),<br>University of Oxford<br>United Kingdom of Great Britain and Northern Ireland (the) |
| Droissart, Vincent<br>Researcher, botanist<br>Institut de recherche pour le développement (IRD)<br>France         | Droste, Nils<br>PhD Candidate Environmental Economics<br>UFZ - Helmholtz Centre for Environmental Research<br>Germany                            | DROUILLY, MARINE<br>PhD candidate, Ecology<br>Institute for Communities and Wildlife in Africa<br>South Africa                                                                                                                         |

|                                                                                                                        |                                                                                                                                         |                                                                                                                                                        |
|------------------------------------------------------------------------------------------------------------------------|-----------------------------------------------------------------------------------------------------------------------------------------|--------------------------------------------------------------------------------------------------------------------------------------------------------|
| Drummond, Hugh *<br>Research Professor<br>Instituto de Ecología, Universidad Nacional Autónoma de México<br>Mexico     | D'Souza, Nola<br>Research Scientist in Biotechnology and Agriculture<br>Curtin University<br>Australia                                  | du Plessis, Christelle<br>Environmental Consultant<br>Habitat Link Consulting<br>South Africa                                                          |
| du Plooy, Schalk<br>Postdoctoral fellow - Marine Biology<br>Nelson Mandela University<br>South Africa                  | du Preez, Derek<br>Director of the School of Environmental Sciences<br>Nelson Mandela University<br>South Africa                        | Du Preez, Pierre<br>Namibia                                                                                                                            |
| Duarte, Bernardo<br>Postdoctoral Fellow, Marine Biology<br>MARE - Marine and Environmental Sciences Centre<br>Portugal | Duarte, Maria<br>Agricultural economics<br>Retired<br>Portugal                                                                          | Duarte de Liz, Rafaela<br>Universidade Federal de Santa Catarina<br>Brazil                                                                             |
| Duarte Osis, Maria Jose<br>Assistant teacher of Bioethics<br>Faculdade de Medicina de Jundiai<br>Brazil                | Dubeau, Svetli<br>Bio-Ecologist<br>UQTR<br>Canada                                                                                       | dubla, rishika<br>Assistant Project Officer<br>Turtle Survival Alliance (India)<br>India                                                               |
| DuBois, Christopher<br>Restoration Coordinator, Conservationist<br>United States of America (the)                      | Dubois, Quentin<br>Researcher in ecology<br>Université catholique de Louvain<br>Belgium                                                 | Dubos, Nicolas<br>MNHN<br>France                                                                                                                       |
| Dubreuil, Geraldine<br>assistant profesor<br>IRBI<br>France                                                            | Dubrovsky, Joseph<br>Professor, Head of the Laboratory<br>Instituto de Biotecnología, Universidad Nacional Autónoma de México<br>Mexico | Dubs, Florence<br>PhD Soil Ecologist<br>France                                                                                                         |
| Ducarme, Frédéric<br>Doctor in ecology<br>Muséum National d'Histoire Naturelle<br>France                               | Ducci, Daniela<br>Full professor, Hydrogeologist, President of the IAH Italian Chapter<br>University of Naples "Federico II"<br>Italy   | Duchatelet, Laurent<br>PhD student in marine biology<br>Catholic University of Louvain<br>Belgium                                                      |
| Duckert, Lowell<br>Associate Professor of English<br>West Virginia University<br>United States of America (the)        | Duckworth, J. W.<br>Director<br>J W Duckworth Ltd<br>United Kingdom of Great Britain and Northern Ireland (the)                         | Duda, Romain<br>Doctor in Ethnoecology<br>Universitat Autònoma de Barcelona - Muséum National d'Histoire Naturelle / Musée de l'Homme (Paris)<br>Spain |
| Dudaniec, Rachael<br>Lecturer in Conservation Biology<br>Macquarie University<br>Australia                             | Dudgeon, Steven<br>Professor of Biology<br>California State University Northridge<br>United States of America (the)                     | Dudle, Dana<br>Professor of Biology<br>DePauw University<br>United States of America (the)                                                             |

|                                                                                                                                                              |                                                                                                                                                                 |                                                                                                                               |
|--------------------------------------------------------------------------------------------------------------------------------------------------------------|-----------------------------------------------------------------------------------------------------------------------------------------------------------------|-------------------------------------------------------------------------------------------------------------------------------|
| Dudley, Alexander<br>Chief Ecologist<br>Faunaverse<br>Australia                                                                                              | Dudley, Richard<br>Adj. Asso.Prof.<br>Cornell University<br>United States of America (the)                                                                      | Dufek, Viktor<br>Prof.Dr.med<br>Hospital<br>Austria                                                                           |
| Duffell, Mark<br>Botanist<br>Manchester Metropolitan University<br>United Kingdom of Great Britain and Northern Ireland (the)                                | Duffy, Karl<br>Belgium                                                                                                                                          | Duflot, Rémi<br>Landscape ecology<br>INRA<br>France                                                                           |
| Dufour, Pauline<br>Hong Kong University<br>Hong Kong                                                                                                         | Dufva, Mikko<br>Research scientist, foresight<br>VTT Technical Research Centre of Finland<br>Finland                                                            | Duggan, Seána<br>Microbiology<br>United Kingdom of Great Britain and Northern Ireland (the)                                   |
| Duhene, Olivier<br>PhD student<br>ISARA-Lyon<br>France                                                                                                       | Duistermaat, Leni (H.)<br>Researcher Flora of the Netherlands, Taxonomist<br>Naturalis Biodiversity Center<br>Netherlands (the)                                 | Duke, Elena<br>Marine Biology<br>Scripps Institution of Oceanography<br>United States of America (the)                        |
| Duľa, Martin<br>Zoology<br>Department of Forest Ecology, Mendel University in Brno<br>Czech Republic (the)                                                   | Dulić, Zorka<br>Associate Professor, zooplankton ecology, water quality<br>University of Belgrade, Faculty of Agriculture<br>Serbia                             | Dullinger, Iwona<br>Research Assistant<br>University of Vienna<br>Austria                                                     |
| Dullinger, Stefan<br>Professor<br>University of Vienna<br>Austria                                                                                            | DuLong, Casey<br>Harvard T.H. Chan School of Public Health<br>United States of America (the)                                                                    | dulormne, maguy<br>lecturer<br>university<br>France                                                                           |
| Dumas, Jean-François<br>Biochemistry/biology Research<br>Inserm / University of Tours<br>France                                                              | Dumortier, Pierre<br>Assistant<br>Univesity of Liège<br>Belgium                                                                                                 | Duncan, Ann<br>Economist<br>none<br>United Kingdom of Great Britain and Northern Ireland (the)                                |
| Duncan, Claire<br>Environmental Conservation student and horticulturalist<br>Bangor University<br>United Kingdom of Great Britain and Northern Ireland (the) | Duncan, Katherine<br>Chancellor's Fellow Drug Discovery and Lecturer<br>University of Strathclyde<br>United Kingdom of Great Britain and Northern Ireland (the) | Duncan, Patrick<br>Emeritus scientist<br>CNRS - French National Centre for Scientific Research,<br>Chizé Laboratory<br>France |
| Duncan, Robert<br>Emeritus Professor, Marine Geology<br>Oregon State University<br>United States of America (the)                                            | Duncan, Sally<br>Director, OSU Policy Analysis Lab (retired)<br>Oregon State University<br>United States of America (the)                                       | Dunck, Barbara<br>Post-doc<br>Universidade Estadual de Maringá<br>Brazil                                                      |

|                                                                                                                                       |                                                                                                                                                   |                                                                                                                                                                                      |
|---------------------------------------------------------------------------------------------------------------------------------------|---------------------------------------------------------------------------------------------------------------------------------------------------|--------------------------------------------------------------------------------------------------------------------------------------------------------------------------------------|
| Dundas, Steven<br>Assistant Professor of Environmental Economics<br>Oregon State University<br>United States of America (the)         | Dunham, Kylee<br>Endangered species population ecology<br>United States of America (the)                                                          | Dunhill, Alex<br>Research Fellow in Palaeobiology<br>University of Leeds<br>United Kingdom of Great Britain and Northern Ireland (the)                                               |
| Dunmyre, Justin<br>Assistant Professor of Mathematics<br>United States of America (the)                                               | Dunn, Barbara<br>Senior Research Scientist, Genomics<br>Stanford University<br>United States of America (the)                                     | Dunn, Christopher<br>Executive Director<br>Cornell Botanic Gardens<br>United States of America (the)                                                                                 |
| Dunne, Jennifer<br>Professor, Vice President for Science<br>Santa Fe Institute<br>United States of America (the)                      | Dunwiddie, Peter<br>Affiliate Professor - Ecology<br>University of Washington<br>United States of America (the)                                   | Dupeyron, Mathilde<br>PhD student<br>IRD<br>France                                                                                                                                   |
| Dupire, Sylvain<br>phD Forest Sciences<br>IRSTEA<br>France                                                                            | Dupraz, Marlene<br>Post-doc<br>CNRS<br>France                                                                                                     | Dupuy, Virginie<br>Molecular Biologist<br>CIRAD<br>France                                                                                                                            |
| Duque, Alvaro<br>Associate Professor<br>Universidad Nacional de Colombia<br>Colombia                                                  | Durán, Jorge<br>Centre for Functional Ecology - University of Coimbra<br>Portugal                                                                 | Durán Romero, Cristina<br>Doctor in Biology<br>Spain                                                                                                                                 |
| DURAND, Patrick<br>Research Engineer, Montpellier<br>CNRS<br>France                                                                   | Durand-Huizing, Anke<br>Ecotoxicology<br>Netherlands (the)                                                                                        | Durán-Riveroll, Lorena María<br>Researcher<br>UNAM<br>Mexico                                                                                                                         |
| Durant, Sarah<br>Senior Research Fellow<br>Zoological Society of London<br>United Kingdom of Great Britain and Northern Ireland (the) | Dürichen, Hendrike<br>Microbiologist<br>Friedrich Schiller University Jena<br>Germany                                                             | Durieux, Laurent<br>Researcher in Geography and Remote Sensing<br>Institut de Recherche pour le Développement<br>France                                                              |
| Duringer, Jennifer<br>Research Associate in Toxicology<br>Oregon State University<br>United States of America (the)                   | Durrant, Kate L.<br>Lecturer in Behavioural Ecology<br>The University of Nottingham<br>United Kingdom of Great Britain and Northern Ireland (the) | Durtsche, Richard<br>Professor of Biological Sciences, Director of the NKU<br>Research and Education Field Station<br>Northern Kentucky University<br>United States of America (the) |
| Duru, Michel<br>Research Director<br>INRA<br>France                                                                                   | Dustan, Phillip<br>Professor of Biology/ Marine Ecologist<br>College of Charleston, South Carolina<br>United States of America (the)              | Duthie, A. Bradley<br>Research Fellow<br>University of Stirling<br>United Kingdom of Great Britain and Northern Ireland (the)                                                        |



|                                                                                                                                     |                                                                                                                                           |                                                                                                                                                       |
|-------------------------------------------------------------------------------------------------------------------------------------|-------------------------------------------------------------------------------------------------------------------------------------------|-------------------------------------------------------------------------------------------------------------------------------------------------------|
| Dutra, Carolina<br>PhD Candidate<br>Mackenzie Presbyterian University<br>Brazil                                                     | Dutra, Valquiria<br>Botany<br>Universidade Federal do Espírito Santo<br>Brazil                                                            | Dutta, Kalloli<br>Project Officer<br>Wildlife Trust of India<br>India                                                                                 |
| Duvallet, Gérard<br>Professor emeritus / Ecology - Medical Entomology<br>University Paul-Valery Montpellier3<br>France              | Dworschak, Peter C.<br>Staff Scientist<br>Naturhistorisches Museum Wien<br>Austria                                                        | Dybala, Kristen<br>Senior Research Ecologist<br>United States of America (the)                                                                        |
| Dyer, Andrew<br>Professor of Ecology<br>University of South Carolina Aiken<br>United States of America (the)                        | Dyer, Chelsey<br>Anthropology<br>Vanderbilt University<br>United States of America (the)                                                  | Dyer, Lee<br>Professor, Chemical Ecology<br>University of Nevada Reno<br>United States of America (the)                                               |
| Dyer, Paul<br>Professor of Fungal Biology<br>University of Nottingham<br>United Kingdom of Great Britain and Northern Ireland (the) | Dyman, Tetyana *<br>professor Ecotrophology<br>Bila Tserkva National Agrarian University<br>Ukraine                                       | Dyson, Paul<br>Professor of Molecular Microbiology<br>Swansea University Medical School<br>United Kingdom of Great Britain and Northern Ireland (the) |
| Dyson, Rebecca<br>Research Fellow (Paediatrics)<br>University of Otago<br>New Zealand                                               | Dzerefos, Cathy<br>Environmental Science<br>North-West University<br>South Africa                                                         | Dzevitskaya, Milada<br>Researcher<br>Canada                                                                                                           |
| Dziba, Luthando<br>Research Leader<br>South African National Parks<br>South Africa                                                  | e Souza Reis, Vanessa Cristine<br>PhD student/ ecology and conservation<br>Griffith University - Australian Rivers Institute<br>Australia | Eads, Angela<br>Postdoctoral Fellow - Biology<br>Trent University<br>Canada                                                                           |
| Eagle, Robert<br>Assistant Professor, Oceanography and Geobiology<br>UCLA<br>United States of America (the)                         | Eagle, W. Ethan<br>Assistant Professor Mechanical Engineering<br>Wayne State University<br>United States of America (the)                 | Earl, Julia<br>Assistant Professor of Biological Sciences<br>Louisiana Tech University<br>United States of America (the)                              |
| Early, John<br>Curator of Entomology<br>Auckland Museum<br>New Zealand                                                              | Eastwood, Erin<br>M.A. in Conservation Biology<br>Columbia University<br>United States of America (the)                                   | Eastwood, Gillian<br>Postdoctoral Research Associate - Disease Ecology<br>United States of America (the)                                              |
| Ebeid, Maha<br>Lecturer of Ecology<br>The Higher Colleges of Technology<br>United Arab Emirates (the)                               | Ebensperger, Luis<br>Full Professor<br>P. Universidad Católica de Chile<br>Chile                                                          | Eberhart, Joyce<br>Senior Faculty Research Assistant, Crop and Soil Science<br>Oregon State University<br>United States of America (the)              |

|                                                                                                                                              |                                                                                                                                            |                                                                                                                                            |
|----------------------------------------------------------------------------------------------------------------------------------------------|--------------------------------------------------------------------------------------------------------------------------------------------|--------------------------------------------------------------------------------------------------------------------------------------------|
| Ebersole, John<br>Biology<br>Univ of Massachusetts Boston<br>United States of America (the)                                                  | Ebert, Andreas<br>Freelance Consultant<br>Germany                                                                                          | Ebert, Franz<br>Research Fellow/International Law<br>Max Planck Institute for Comparative Public Law and<br>International Law<br>Germany   |
| Ebner, Brendan<br>Aquatic Ecologist<br>TropWATER, James Cook University<br>Australia                                                         | Echegaray, Jorge<br>Independent Researcher<br>Nature Conservation and Research Group of Alava<br>province in Northern Spain-GADEN<br>Spain | Echelle, Anthony<br>Professor Emeritus, Ichthyology<br>Oklahoma State University<br>United States of America (the)                         |
| Echeve, Maria A<br>Biologist<br>Pontificia Universidad Javeriana<br>Colombia                                                                 | Echeverria, Carlos Alejandro<br>Pos doctoral researcher<br>IVIG-COPPE-UFRJ<br>Brazil                                                       | Echeverry, Andrea<br>Microbiology & Immunology<br>Colombia                                                                                 |
| Echeverry-Alcendra, Andrea<br>Interim Executive Director / Conservation Biologist<br>Colombian Association of Zoos and Aquariums<br>Colombia | Echeveste, Pedro<br>Assistant professor<br>Universidad de Antofagasta<br>Chile                                                             | Echternacht, Arthur<br>Professor of Ecology & Evolutionary Biology<br>University of Tennessee, Knoxville<br>United States of America (the) |
| Eckberg, James<br>Plant Ecology/ Agronomist<br>Xerces Society for Invertebrate Conservation<br>United States of America (the)                | Eckert, Diana<br>phd candidate<br>The department of forestry and wood technology at the<br>Linnaeus University<br>Sweden                   | Eckert, Karen<br>Professor<br>Principia College<br>United States of America (the)                                                          |
| Eckert, Lauren<br>Conservation Scientist, MSc, PhD Student<br>University of Victoria<br>Canada                                               | Eckert, Scott<br>Professor<br>Principia College<br>United States of America (the)                                                          | Eckerter, Philipp Wolfgang<br>PhD Student<br>Institute for Environmental Sciences<br>Germany                                               |
| Eckstein, Lutz<br>Professor of Biology<br>Karlstad University<br>Sweden                                                                      | Edds, David<br>Professor, Biological Sciences<br>Emporia State University<br>United States of America (the)                                | Edelaar, Pim<br>Researcher, Evolutionary Biology<br>University Pablo de Olavide<br>Spain                                                   |
| Edens, Caree<br>Natural Resource Specialist<br>University of Hawaii Sea Grant<br>United States of America (the)                              | Edes, Joanne<br>Marine Science<br>Australia                                                                                                | Edgar, Graham<br>University of Tasmania<br>Australia                                                                                       |
| Edgerly, James<br>PhD student in ecology<br>Lancaster University<br>United Kingdom of Great Britain and Northern Ireland<br>(the)            | Edie, Christie-Anne<br>United States of America (the)                                                                                      | Edtbauer, Achim<br>Researcher in Atmospheric Sciences<br>Max Planck Institute for Chemistry<br>Germany                                     |

|                                                                                                                                                    |                                                                                                                       |                                                                                                                                           |
|----------------------------------------------------------------------------------------------------------------------------------------------------|-----------------------------------------------------------------------------------------------------------------------|-------------------------------------------------------------------------------------------------------------------------------------------|
| Eduardo, Anderson A.<br>Theoretical Biologist<br>Federal University of Sergipe<br>Brazil                                                           | Eduardo, Assad<br>Researcher<br>Embrapa<br>Brazil                                                                     | Eduardo, Hugo<br>Animal Behavior<br>UFRN<br>Brazil                                                                                        |
| Edwards, Alasdair<br>Emeritus Professor<br>Newcastle University<br>United Kingdom of Great Britain and Northern Ireland (the)                      | Edwards, Christine<br>Conservation Geneticist<br>Missouri Botanical Garden<br>United States of America (the)          | Edwards, Danielle L.<br>Assistant Professor<br>University of California, Merced<br>United States of America (the)                         |
| Edwards, David<br>Senior Lecturer in Conservation Science<br>University of Sheffield<br>United Kingdom of Great Britain and Northern Ireland (the) | Edwards, Rachel<br>Coastal Geoscientist<br>Texas A&M University- Corpus Christi<br>United States of America (the)     | Edwards, Robert<br>Professor of Biology<br>University of Texas Rio Grande Valley<br>United States of America (the)                        |
| Edwards, Robert Arthur<br>Government Scientist - transport and energy policy<br>European Commission<br>Italy                                       | Edwards, Sarah<br>Ecologist<br>Leibniz Institute for Zoo and Wildlife Research<br>Namibia                             | Edwards, Taylor<br>Associate Staff Scientist; Conservation Genetics - MSc, PhD<br>University of Arizona<br>United States of America (the) |
| Edwards, Tracey<br>Conservation consultant<br>Jamaica                                                                                              | Edwards, Yvonne<br>Forestry<br>United Kingdom of Great Britain and Northern Ireland (the)                             | Edwards de Vargas, Suzanne<br>Biologist, Environmental Educator<br>Independent contractor<br>Bolivia (Plurinational State of)             |
| Edwin, Natasha<br>Student<br>University of Hawaii at Hilo<br>Micronesia (Federated States of)                                                      | Egamberdieva, Dilfuza<br>Research Group Leader<br>Centre of Ecobiome, National University of Uzbekistan<br>Uzbekistan | Egas, Martijn<br>Assistant Professor Evolutionary Population Biology<br>IBED / University of Amsterdam<br>Netherlands (the)               |
| Egea, Emilie<br>Ecotoxicology<br>Rovertain Foundation<br>France                                                                                    | Egea, Luis G.<br>Marine Ecology<br>Spain                                                                              | Egerton-Warburton, Louise<br>Associate Scientist, Soil and Microbial Ecology<br>Chicago Botanic Garden<br>United States of America (the)  |
| Egger, Garry<br>Vice President;<br>Australasian Society of Lifestyle Medicine<br>Australia                                                         | Egger, Mark<br>Research Associate, Botany<br>Burke Museum, WTU Herbarium, Seattle<br>United States of America (the)   | Eggers, Lilian<br>Prof., Department of Botany<br>UFRGS<br>Brazil                                                                          |
| Eggers, Sabine<br>Bioanthropologist<br>University Sao Paulo - Brazil, Natural History Museum<br>Vienna - Austria<br>Austria                        | Eggers Gorab, Matthias<br>Biology Student<br>Freie Universität Berlin<br>Germany                                      | Eggert, Ron<br>Physician<br>Selian Lutheran Hospital<br>Tanzania, United Republic of                                                      |

|                                                                                                                                          |                                                                                                                                                                                          |                                                                                                                              |
|------------------------------------------------------------------------------------------------------------------------------------------|------------------------------------------------------------------------------------------------------------------------------------------------------------------------------------------|------------------------------------------------------------------------------------------------------------------------------|
| Egidi, Eleonora<br>Microbial Ecology<br>La Trobe University<br>Australia                                                                 | Egilsdottir, Hronn<br>Post-doctoral researcher<br>University of Iceland<br>Iceland                                                                                                       | Egli, Lukas<br>PhD student<br>Helmholtz Centre for Environmental Research UFZ<br>Germany                                     |
| Eguiraun, Harkaitz<br>Adjunct Professor<br>University of the Basque Country UPV/EHU<br>Spain                                             | Egydio Barreto, Tiago<br>Biologist<br>Fundação Espaço Eco<br>Brazil                                                                                                                      | Ehlers Smith, David<br>Post-doctoral research fellow, conservation biology<br>University of KwaZulu-Natal<br>South Africa    |
| Ehrenfeld, David *<br>Distinguished Professor of Biology<br>Rutgers University<br>United States of America (the)                         | Ehrlich, Paul *<br>President, Center for Conservation Biology<br>Ehrlich<br>United States of America (the)                                                                               | Ehrmann, Anja<br>MSc Biotechnology<br>TU Berlin<br>Germany                                                                   |
| Ehrmann, Steffen<br>PhD Candidate<br>ALU Freiburg<br>Germany                                                                             | Eichenberg, David<br>Postdoctoral researcher in Ecosystem Services and<br>Ecosystem Functioning<br>Centre for integrative Biodiversity Research (iDiv) Halle-<br>Jena-Leipzig<br>Germany | Eichhorn, Götz<br>post-doc, animal ecology research<br>Netherlands Institute of Ecology (NIOO-KNAW)<br>Netherlands (the)     |
| Eichhorn, Markus<br>Lecturer in Ecology<br>The University of Nottingham<br>United Kingdom of Great Britain and Northern Ireland<br>(the) | Eiden, Frank<br>Professor for Bioprocess Engineering<br>Westfälische Hochschule<br>Germany                                                                                               | Eidesen, Pernille Bronken<br>Associate Professor in Arctic Biology<br>The University Centre in Svalbard<br>Norway            |
| Eikelboom, Jasper A.J.<br>PhD Candidate in Ecology<br>Wageningen University & Research<br>Netherlands (the)                              | Eilam, Omer<br>Computational Biology<br>Tel Aviv University<br>Israel                                                                                                                    | Einarsson, Páll<br>Professor of Geophysics, emeritus<br>University of Iceland<br>Iceland                                     |
| Einzmann, Helena<br>scientific staff / biology<br>Germany                                                                                | Eiras, Leticia<br>Senior Biomedical Scientist, MSc biotechnology and<br>molecular biology<br>United Kingdom of Great Britain and Northern Ireland<br>(the)                               | Eirund, Gesa<br>PhD Student, Atmospheric Physics<br>Institute for Atmospheric and Climate Science, ETH Zurich<br>Switzerland |
| Eiselin, Maxime<br>Environmental Scientist<br>Eiselin<br>Netherlands (the)                                                               | Eisen, Olaf<br>Professor for Glaciology<br>Germany                                                                                                                                       | Eisenhauer, Nico<br>Professor, Ecology<br>Leipzig University<br>Germany                                                      |
| Eisenring, Michael<br>Chemical ecologist<br>Agroscope, Agroecology and Environment<br>Switzerland                                        | Eisikowitch, Dan<br>Professor emeritus<br>Tel Aviv University<br>Israel                                                                                                                  | Eisner, Rowan<br>Conservation scientist<br>University of Cambridge<br>Australia                                              |

|                                                                                                                                                                      |                                                                                                                                                                                        |                                                                                                                                                                                                             |
|----------------------------------------------------------------------------------------------------------------------------------------------------------------------|----------------------------------------------------------------------------------------------------------------------------------------------------------------------------------------|-------------------------------------------------------------------------------------------------------------------------------------------------------------------------------------------------------------|
| Ejrnæs, Rasmus<br>Senior researcher<br>Aarhus University<br>Denmark                                                                                                  | Ekar, Jill<br>Researcher, The Microbial and Plant Genomics Institute<br>University of Minnesota<br>United States of America (the)                                                      | Ekbom, Barbara<br>Professor<br>Swedish University of Agricultural Sciences<br>Sweden                                                                                                                        |
| Ekins, Merrick<br>Collection Manager Sessile Marine Invertebrates<br>Queensland Museum<br>Australia                                                                  | Eklöf, Johan<br>Assistant Professor<br>Stockholm University<br>Sweden                                                                                                                  | Eklöv, Peter<br>Professor in Limnology<br>Dep. of Ecology and Genetics - Limnology<br>Sweden                                                                                                                |
| Ekmekci, Guler<br>Prof./Biologist<br>Hacettepe University<br>Turkey                                                                                                  | Ekpe, Sonigitu<br>Head of Biodiversity, Marine Protection and Ecotourism<br>Cross River State Government, Department of<br>Biodiversity, Marine Protection and Conservation<br>Nigeria | Ekperusi, Abraham<br>PhD Candidate<br>World Bank Africa Center of Excellence, Center for<br>Oilfield Chemicals Research, Institute of Petroleum<br>Studies, University of Port Harcourt, Nigeria<br>Nigeria |
| Ekrem, Torbjørn *<br>Professor of biosystematics<br>Norwegian University of Science and Technology<br>Norway                                                         | Ekstrom, Laura<br>Assistant Professor, Biology<br>Wheaton College, MA<br>United States of America (the)                                                                                | EL ALAOUI, Aicha<br>Morocco                                                                                                                                                                                 |
| EL ATTAR, Oumayma<br>Vet student<br>National Veterinary School Toulouse, France<br>France                                                                            | EL KHARRAZ, Jauad<br>Head of Research (Desalination, Water Resources,<br>Remote Sensing, Science..)<br>Middle East Desalination Research Center (MEDRC)<br>Oman                        | Elbroch, Mark<br>Lead Scientist, Pumas<br>Panthera<br>United States of America (the)                                                                                                                        |
| Elder, John<br>Freshwater Ecology<br>U.S. Geological Survey (retired)<br>United States of America (the)                                                              | Elemans, Coen<br>Associate Professor Biology<br>University of Southern Denmark<br>Denmark                                                                                              | Elersek, Tina<br>Slovenia                                                                                                                                                                                   |
| El-Hani, Charbel<br>Full Professor<br>Federal University of Bahia<br>Brazil                                                                                          | Elia, Marta<br>PhD<br>University of Turin<br>Italy                                                                                                                                     | Elias, Gemma<br>PhD Student<br>University of Girona<br>Spain                                                                                                                                                |
| Elias, Gwenith<br>Sustainable Development Research Officer<br>Sustainability Lab, Bangor University<br>United Kingdom of Great Britain and Northern Ireland<br>(the) | Elias, Larissa<br>Brazil                                                                                                                                                               | Elias, Marianne<br>Researcher<br>CNRS<br>France                                                                                                                                                             |

|                                                                                                                               |                                                                                                                                         |                                                                                                                                                                                                   |
|-------------------------------------------------------------------------------------------------------------------------------|-----------------------------------------------------------------------------------------------------------------------------------------|---------------------------------------------------------------------------------------------------------------------------------------------------------------------------------------------------|
| Eliasson, Peter<br>Lecturer, PhD System Ecology<br>Botswana International University of Science and<br>Technology<br>Botswana | Eliran, Alon<br>PhD student, Environmental Studies<br>Tel Aviv University<br>Israel                                                     | Elise, Simon<br>PhD Student<br>UMR 9220 ENTROPIE - NORTEKMED<br>Réunion                                                                                                                           |
| Eliyahu, Amit<br>PhD Candidate<br>Ben Gurion University<br>Israel                                                             | Elizalde Duarte, Reyes<br>Physicist<br>King's college London<br>Mexico                                                                  | Elkin, Sarah<br>Zoology<br>University of Leeds<br>United Kingdom of Great Britain and Northern Ireland<br>(the)                                                                                   |
| Ellenby, Marc<br>Tropical botany<br>Florida International University<br>United States of America (the)                        | Elliff, Carla<br>PhD student<br>Universidade Federal da Bahia<br>Brazil                                                                 | Ellingham, Oliver<br>Early career researcher<br>University of Reading, Royal Horticultural Society, Royal<br>Botanic Gardens Kew<br>United Kingdom of Great Britain and Northern Ireland<br>(the) |
| Elliott, Louis<br>Plant Ecology<br>NT Department of Natural Resources and Environment<br>Australia                            | Elliott, Michelle<br>Marine Ecologist<br>SEPA<br>United Kingdom of Great Britain and Northern Ireland<br>(the)                          | Ellis, Elisabeth<br>Associate Professor and Director, Philosophy, Politics,<br>and Economics Programme<br>University of Otago<br>New Zealand                                                      |
| Ellis, Peter<br>Forest Ecologist<br>United States of America (the)                                                            | Ellis, Robert<br>Post Doctoral Research Fellow<br>University of Exeter<br>United Kingdom of Great Britain and Northern Ireland<br>(the) | Ellis, Robert<br>Research Scientist<br>United States of America (the)                                                                                                                             |
| Ellis, Ryan<br>Research Associate<br>Western Australian Museum<br>Australia                                                   | Ellison, Aaron<br>Senior Research Fellow on Ecology<br>Harvard University<br>United States of America (the)                             | Ellwood, Elizabeth<br>Ecologist<br>United States of America (the)                                                                                                                                 |
| Elmoor-Loureiro, Lourdes<br>Catholic University of Brasília<br>Brazil                                                         | Elmore, Jared<br>Doctoral Fellow<br>Oklahoma State University<br>United States of America (the)                                         | Elorza, Ainara<br>Postdoctoral researcher in Neuroscience<br>Centro de Biología Severo Ochoa (CBMSO)<br>Spain                                                                                     |
| Elosegi, Arturo<br>Professor of Ecology<br>University of the Basque Country<br>Spain                                          | Elosegi, Pedro<br>Research Scientist<br>MIT<br>United States of America (the)                                                           | Elphinstone, Andrew<br>Environmental Scientist<br>Taronga Conservation Society Australia<br>Australia                                                                                             |

|                                                                                                                                                                                          |                                                                                                                                              |                                                                                                                                                       |
|------------------------------------------------------------------------------------------------------------------------------------------------------------------------------------------|----------------------------------------------------------------------------------------------------------------------------------------------|-------------------------------------------------------------------------------------------------------------------------------------------------------|
| Elphinstone, Rob<br>space physicist<br>retired<br>Canada                                                                                                                                 | El-Sabaawi, Rana<br>Assistant professor/Biologist<br>University of Victoria<br>Canada                                                        | Elsby, Derek<br>PhD Researcher<br>University of the Highlands & Islands<br>United Kingdom of Great Britain and Northern Ireland<br>(the)              |
| Elsler, Laura<br>Stockholm Resilience Center<br>Sweden                                                                                                                                   | Elsner, Martin<br>Professor of Analytical Chemistry and Water Chemistry<br>Technical University of Munich<br>Germany                         | Elsner, Paul<br>Birkbeck, University of London<br>United Kingdom of Great Britain and Northern Ireland<br>(the)                                       |
| Elson, Dominic<br>Development Economist<br>Forest Connect<br>United Kingdom of Great Britain and Northern Ireland<br>(the)                                                               | Elst, Evelyne<br>Plant ecology<br>University of Antwerp<br>Belgium                                                                           | Elts, Jaanus<br>Estonia                                                                                                                               |
| Elwood, Kelsey<br>PhD Student, Ecology<br>University of Colorado<br>United States of America (the)                                                                                       | Ely, Roger<br>Associate Professor/Ecological Engineering<br>Oregon State University<br>United States of America (the)                        | Emam, Wasseem<br>PhD Researcher - Fisheries and Aquaculture<br>University of Glasgow<br>United Kingdom of Great Britain and Northern Ireland<br>(the) |
| Embling, Clare<br>Lecturer in Marine Ecology<br>Plymouth University<br>United Kingdom of Great Britain and Northern Ireland<br>(the)                                                     | Emelander, Kaitlyn<br>Grand Valley State University<br>United States of America (the)                                                        | Emer, Carine<br>Post-doctoral researcher<br>São Paulo State University<br>Brazil                                                                      |
| Emerson, Brent<br>Research Scientist<br>Spanish National Science Research Council (CSIC)<br>Spain                                                                                        | Emerson, Luke<br>Recent BSc graduate<br>University of New England Australia<br>Australia                                                     | Emery, Nancy<br>Assistant Professor<br>University of Colorado Boulder<br>United States of America (the)                                               |
| Emmerich, Daniel<br>Associated Researcher, Biology. Teacher training<br>Instituto de Biodiversidad Neotropical (CONICET-UNT).<br>Esc. Normal Superior V.Sársfield (Córdoba)<br>Argentina | Emmet, Robert<br>M.S. student, Quantitative Ecology and Resource<br>Management<br>University of Washington<br>United States of America (the) | Emperaire, Laure<br>Senior researcher, ethnobotany<br>IRD<br>France                                                                                   |
| Endo, Whaldener<br>research scientist<br>National Centre for Carnivore Conservation (ICMBio-<br>CENAP)<br>Brazil                                                                         | Endo, Whaldener<br>researcher<br>National Centre for Carnivore Conservation - CENAP<br>Brazil                                                | Endres, Sonja<br>Scientist, Biological Oceanography<br>GEOMAR Helmholtz Centre for Ocean Research Kiel<br>Germany                                     |

|                                                                                                                                                       |                                                                                                                      |                                                                                                                                                                                    |
|-------------------------------------------------------------------------------------------------------------------------------------------------------|----------------------------------------------------------------------------------------------------------------------|------------------------------------------------------------------------------------------------------------------------------------------------------------------------------------|
| engel, julien<br>botanist<br>ICTB<br>France                                                                                                           | Engelbrecht, Bettina<br>Professor, Ecology<br>University of Bayreuth<br>Germany                                      | Engelhardt, Christof<br>senior scientist<br>Leibniz-Institute of Freshwater Ecology and Inland<br>Fisheries<br>Germany                                                             |
| Engelhardt, Christof<br>Physical Limnologist<br>Leibniz-Institute of Freshwater Ecology and Inland<br>Fisheries, Berlin<br>Germany                    | Engelhardt, Jan<br>PhD student<br>University of Leipzig<br>Germany                                                   | Engelke, Clemens<br>Unit Manager<br>State Agency of Environment, Nature Conservation and<br>Geology, Mecklenburg-Vorpommern<br>Germany                                             |
| Engelke, Roswitha<br>PhD in Physics<br>Housewife<br>Germany                                                                                           | Engelman, Catherine<br>Graduate student<br>Oregon State University<br>United States of America (the)                 | Engelmann, Rolf A.<br>PhD<br>University Leipzig<br>Germany                                                                                                                         |
| Engleman, Abigail<br>Doctoral Student<br>Florida State University<br>United States of America (the)                                                   | Engler, Jan<br>PostDoc Biology / Biogeography / Ornithology<br>Terrestrial Ecology Unit, Ghent University<br>Belgium | English, Peter<br>Public Health Physician, specialising in health protection<br>N/A - this is a personal response<br>United Kingdom of Great Britain and Northern Ireland<br>(the) |
| Englund, Göran<br>Professor<br>Umeå University<br>Sweden                                                                                              | Enjalbert, Jérôme<br>Scientist<br>INRA<br>France                                                                     | Ennes Silva, Felipe<br>Primatologist<br>Mamiraua Institute for Sustainable Development<br>Brazil                                                                                   |
| Enright, Jim<br>Asia Cordinator / Mangrove Ecology<br>Mangrove Action Project<br>Thailand                                                             | ENRIQUEZ, CECILIA<br>Oceanographer<br>National University in Mexico (UNAM)<br>Mexico                                 | ENRIQUEZ, MARIA AMELIA<br>Deputy Secretary of Science and Technology of Para State<br>Secretary of Science and Technology of Para State<br>Brazil                                  |
| Enstipp, Manfred<br>Postdoctoral Researcher, Biologist<br>IPHC-DEPE/CNRS<br>France                                                                    | Entling, Martin<br>Professor of Ecosystem Analysis<br>University of Koblenz-Landau<br>Germany                        | Epelboin, Loïc<br>Specialist in infectious and tropical diseases<br>Centre Hospitalier Andrée Rosemon, Université de<br>Guyane, Cayenne<br>French Guiana                           |
| Epp, Laura<br>Postdoctoral Researcher<br>Alfred Wegener Institute Helmholtz Centre for Polar und<br>Marine Research, Research Unit Potsdam<br>Germany | Epperly, Sheryan<br>marine biologist<br>retired (NOAA NMFS)<br>United States of America (the)                        | Eppley, John<br>Computational Biologist<br>University of Hawaii, Manoa<br>United States of America (the)                                                                           |



|                                                                                                                        |                                                                                                             |                                                                                                                                                   |
|------------------------------------------------------------------------------------------------------------------------|-------------------------------------------------------------------------------------------------------------|---------------------------------------------------------------------------------------------------------------------------------------------------|
| Epron, Daniel *<br>Professor, Forest Biology<br>Université de Lorraine<br>France                                       | Equihua, Clementina<br>Science Communication<br>National Autonomous University of Mexico, UNAM<br>Mexico    | Eradam, Yusuf<br>Academic<br>Istanbul Kultur University<br>Turkey                                                                                 |
| Erazo Loor, Josue<br>Ingeniero Ambiental<br>Universidad Técnica Particular de Loja<br>Ecuador                          | Erdmann, James<br>Biology<br>Southeastern Louisiana University<br>United States of America (the)            | Erdmann, Sandra<br>Marine Biology<br>Germany                                                                                                      |
| Erdozain, Maitane<br>Biology<br>University of New Brunswick<br>Canada                                                  | Ergeneman, Candan<br>Environmental Management<br>Development Research Center, University of Bonn<br>Germany | Eriander, Louise<br>Researcher<br>Dept. of Marine Sciences Gothenburg University<br>Sweden                                                        |
| Ericksen, Polly<br>Program Leader Sustainable Livestock Systems<br>International Livestock Research Institute<br>Kenya | Ericson, Helena Sif<br>Conservation biologist<br>Iceland                                                    | Ericson Jogsten, Ingrid<br>Assistant professor/chemistry<br>Örebro university<br>Sweden                                                           |
| Eriksen, Ane<br>Postdoctoral researcher (Ecology)<br>Inland Norway University of Applied Sciences<br>Norway            | Eriksson, Amanda<br>Sweden                                                                                  | Eriksson, K. Martin<br>Researcher, Marine Ecotoxicology<br>Chalmers University of Technology<br>Sweden                                            |
| Eriksson, Maertha<br>PhD student in Biology<br>Stockholm University<br>Sweden                                          | Eriksson, Susanne<br>PhD<br>Department of biological and environmental sciences<br>Sweden                   | Erkens, Roy<br>Lecturer Evolutionary biology and Botany<br>Maastricht Science Programme - Maastricht University<br>Netherlands (the)              |
| Erkut, Cihan<br>Postdoctoral Researcher, Biochemistry<br>European Molecular Biology Laboratory<br>Germany              | Erlwein, Alfredo<br>Professor<br>Facultad de Ciencias Agrarias, Universidad Austral de Chile<br>Chile       | Ernest, Holly<br>Professor and Excellence Chair, Wildlife Genomics and Disease Ecology<br>University of Wyoming<br>United States of America (the) |
| Ernst, Jessica<br>Environmental Scientist<br>Ernst<br>Canada                                                           | Ernst, Stefan<br>Humboldt-Universität zu Berlin<br>Germany                                                  | Eronen, Jussi<br>Researcher (Geosciences)<br>University of Helsinki<br>Finland                                                                    |
| Erosa, Claudia<br>Marine biologist<br>Universidad Autonoma de Baja California Sur<br>Mexico                            | Eroukhmanoff, Fabrice<br>Evolutionary Ecologist<br>CEES, University of Oslo<br>Norway                       | Erritto Barbo, Fausto<br>Post-Doctoral fellow<br>Museu de Zoologia da Universidade de São Paulo<br>Brazil                                         |

|                                                                                                                              |                                                                                                                     |                                                                                                                                                                                                     |
|------------------------------------------------------------------------------------------------------------------------------|---------------------------------------------------------------------------------------------------------------------|-----------------------------------------------------------------------------------------------------------------------------------------------------------------------------------------------------|
| Ersoy, Zeynep<br>PhD student, Aquatic Ecology<br>University of Vic - Central University of Catalonia (UVIC-<br>UCC)<br>Spain | Erwin, Terry<br>Research Entomologist<br>Smithsonian Institution<br>United States of America (the)                  | Esbérard, Carlos<br>Assosiated Professor of Zoology<br>Universidade Federal Rural do Rio de Janeiro<br>Brazil                                                                                       |
| Escalante, Patricia<br>Professor<br>Universidad Ncional Autonoma de Mexico<br>Mexico                                         | Escalera-Vázquez, Luis<br>Researcher (Aquatic Ecology)<br>CONACyT-INIRENA-UMSNH<br>Mexico                           | Escamilla Molgora, Juan<br>PhD Student<br>Lancaster University<br>United Kingdom of Great Britain and Northern Ireland<br>(the)                                                                     |
| Escarguel, Gilles<br>Associate-Professor in Paleontology and Macroecology<br>University Claude Bernard Lyon 1<br>France      | Escarmis Homs, Cristina<br>Retired virologist<br>Centro Superior de Investigaciones Científicas<br>Spain            | Escobar, Elva<br>Professor Oceanography<br>Universidad Nacional Autonoma de Mexico<br>Mexico                                                                                                        |
| Escobar, Lina *<br>Biology- Herpetology<br>Universidad Nacional de Colombia<br>Colombia                                      | Escobedo, Francisco J<br>Professor Socio-Ecological Systems<br>Universidad del Rosario- Biology Program<br>Colombia | Escobedo Kenefic, Natalia<br>Biologist, Researcher on pollination and ecosystem<br>services<br>Centro de Estudios Conservacionistas (CECON),<br>Universidad de San Carlos de Guatemala<br>Guatemala |
| Escolà, Marta<br>Biologist<br>Autonomous University of Barcelona<br>Spain                                                    | ESCOUBAS, Jean-Michel<br>Researcher<br>CNRS<br>France                                                               | Escribano-Avila, Gema<br>Post-doctoral researcher<br>Instituto Mediterráneo de Estudios Avanzandos<br>Spain                                                                                         |
| Escudero, Adrián<br>Professor<br>Universidad Rey Juan Carlos<br>Spain                                                        | Escudero, Marcial<br>Assitant Professor in Botany<br>University of Seville<br>Spain                                 | Eshaghoff, Mathew<br>United States of America (the)                                                                                                                                                 |
| Eshel, Gidon<br>geophysicist<br>United States of America (the)                                                               | Esler, Karen<br>Professor, Conservation Ecology<br>Stellenbosch University<br>South Africa                          | Esnouf, Antoine<br>PhD candidate<br>INRA<br>France                                                                                                                                                  |
| Espadaler, Xavier<br>Associated Researcher<br>Centre for Ecological Research and Forestry Applications<br>(CREAF)<br>Spain   | Espeland, Marianne<br>Curator<br>Zoological Research Museum Alexander Koenig, Bonn<br>Germany                       | Esperanza, Calvo<br>Researcher in air pollution effects on plants<br>Spain                                                                                                                          |

|                                                                                                                          |                                                                                                                                  |                                                                                                                       |
|--------------------------------------------------------------------------------------------------------------------------|----------------------------------------------------------------------------------------------------------------------------------|-----------------------------------------------------------------------------------------------------------------------|
| Esperon-Rodriguez, Manuel<br>Postdoctoral Research Fellow<br>Western Sydney University<br>Australia                      | Espinaze, Marcela<br>PhD candidate<br>Stellenbosch University<br>South Africa                                                    | Espinosa, Al<br>Aquatic Biologist<br>Retired<br>United States of America (the)                                        |
| Espinosa, Cayetano<br>PhD Student<br>Universidad Andrés Bello<br>Chile                                                   | Espinosa, Free<br>Lecturer / Zoology<br>University of Sevilla<br>Spain                                                           | Espinosa, Hector<br>Fish Curator CNPE, IBUNAM<br>Universidad Nacional Autónoma de México<br>Mexico                    |
| Espinosa Andrade, Noemi<br>Master student<br>Universidad Autónoma de Baja California Sur<br>Mexico                       | Espinosa Ramirez, Adriana Janneth<br>teachear aquatic toxicology<br>Universidad Pedagógica y Tecnológica de Colombia<br>Colombia | Espinosa-Cantellano, Martha<br>Professor<br>Center for Research and Advanced Studies, Mexico City<br>Mexico           |
| Espinosa-García, Francisco<br>Professor, chemical ecology of plants<br>Universidad Nacional Autónoma de México<br>Mexico | Espinoza, Mario<br>Professor, Biology Department<br>Universidad de Costa Rica<br>Costa Rica                                      | Espinoza, Robert<br>Professor of Biology<br>California State University, Northridge<br>United States of America (the) |
| Esquete, Patricia<br>Postdoctoral researcher/Biology<br>Universidade de Aveiro<br>Portugal                               | Esseen, Per-Anders<br>Prof.<br>Dept. of Ecology and Environmental Science, Umeå<br>University, Umeå<br>Sweden                    | Esser, Helen<br>Postdoc in tick-borne disease ecology<br>Wageningen University<br>Netherlands (the)                   |
| ESSI, LILIANA<br>FULL PROFESSOR/BOTANY<br>UNIVERSIDADE FEDERAL DE SANTA MARIA<br>Brazil                                  | Essl, Franz<br>Assistant Professor, Ecology<br>University Vienna<br>Austria                                                      | Estades, Naina<br>Professor of Environment and Development<br>Federal University of Parana<br>Brazil                  |
| Esteban, Sara<br>PhD Epidemiology and Public Health<br>Spain                                                             | Estelle, Billard<br>PhD candidate<br>Nantes University<br>France                                                                 | Estep, Cynthia *<br>Sociology<br>United States of America (the)                                                       |
| Estep, James<br>Scientist, Genetics<br>Inova Health System<br>United States of America (the)                             | Estes, James<br>Professor<br>University of California<br>United States of America (the)                                          | Estes-Morgan, Kathy<br>Wildlife rehabilitation, education and conservation<br>United States of America (the)          |
| Esteve, Isabel<br>Professor /Microbial Ecology<br>Autonomous University of Barcelona<br>Spain                            | Esteve-Selma, Miguel-Angel<br>Professor of Ecology<br>University of Murcia<br>Spain                                              | Estévez, Rocío<br>Ecologia<br>Universidad Nacional de Cuyo<br>Argentina                                               |

|                                                                                                                                          |                                                                                                                                                    |                                                                                                                               |
|------------------------------------------------------------------------------------------------------------------------------------------|----------------------------------------------------------------------------------------------------------------------------------------------------|-------------------------------------------------------------------------------------------------------------------------------|
| Estévez Varón, Jaime V.<br>Professor<br>Universidad de Caldas<br>Colombia                                                                | ESTRADA, ALEJANDRO<br>SENIOR SCIENTIST<br>INSTITUTO DE BIOLOGIA, Universidad Nacional<br>Autonoma de Mexico<br>Mexico                              | Estrada, Christian<br>Ecologist<br>Fundacion Defensores de la Naturaleza<br>Guatemala                                         |
| Estrada-Peña, Agustín<br>Professor of Zoonoses<br>University of Zaragoza<br>Spain                                                        | ETCHEVERRY, ANGELA VIRGINIA<br>PROFESSOR OF BOTANY<br>UNIVERSIDAD NACIONAL DE SALTA<br>Argentina                                                   | Etchevers, Heather<br>Developmental biologist<br>INSERM, Aix-Marseille University<br>France                                   |
| Etchevers, J. D.<br>Professor of Soil<br>Coelgio de psotgradaudos<br>Mexico                                                              | Eterovick, Paula<br>Ecologist - Associate Professor<br>Pontificia Universidade Católica de Minas Gerais<br>Brazil                                  | Etherington, Thomas<br>United Kingdom of Great Britain and Northern Ireland<br>(the)                                          |
| Etienne, Rouby<br>Master degree student in marine ecology and<br>oceanography<br>Université Pierre et Marie curie<br>France              | Etoundi, Emilie<br>Belgium                                                                                                                         | Etxebeste, Oier<br>Lecturer/Microbiology<br>University of the Basque Country<br>Spain                                         |
| Etxebeste Larrañaga, Iñaki<br>Independent researcher in Forest Insect Ecology<br>Spain                                                   | Euán Chi, Isaí<br>PhD Student<br>Federal University of São Carlos<br>Brazil                                                                        | Eugenio, Marcia *<br>Professor<br>University of Valladolid<br>Spain                                                           |
| Evangelista Gomes, Samara<br>Junior Researcher / PhD Student<br>Center for Development Research, One Health Graduate<br>School<br>Brazil | Evans, Alina<br>Wildlife Veterinarian<br>Hedmark University of Applied Sciences<br>Norway                                                          | Evans, Darren<br>University Lecturer<br>Newcastle University<br>United Kingdom of Great Britain and Northern Ireland<br>(the) |
| Evans, David<br>Professor Emeritus of Biology<br>University of Florida<br>United States of America (the)                                 | Evans, Elaine<br>Assistant Professor of Extension<br>University of Minnesota<br>United States of America (the)                                     | Evans, Jonah<br>State Mammalogist<br>Texas Parks and Wildlife<br>United States of America (the)                               |
| Evans, Julian<br>Lecturer in Ecology<br>University of Malta<br>Malta                                                                     | Evans, Karl<br>Senior Lecturer in Conservation Biology<br>University of Sheffield<br>United Kingdom of Great Britain and Northern Ireland<br>(the) | Evans, Katy<br>Associate Professor, Applied Geology<br>Curtin University<br>Australia                                         |
| Evans, Matthew<br>Dean of Science<br>The University of Hong Kong<br>Hong Kong                                                            | Evans, Meaghan<br>Wildlife Conservation<br>Danau Girang Field Centre<br>Malaysia                                                                   | Evans, Michelle<br>PhD Student<br>University of Georgia<br>United States of America (the)                                     |

|                                                                                                                                                                                         |                                                                                                                                 |                                                                                                                                                             |
|-----------------------------------------------------------------------------------------------------------------------------------------------------------------------------------------|---------------------------------------------------------------------------------------------------------------------------------|-------------------------------------------------------------------------------------------------------------------------------------------------------------|
| <p>Evans, Nathaniel<br/>Postdoctoral Research Fellow<br/>National Museum of Natural History, Smithsonian<br/>United States of America (the)</p>                                         | <p>Evans, Theodore<br/>Associate Professor of Applied Entomology<br/>The University of Western Australia<br/>Australia</p>      | <p>Evelyn, Michelle<br/>Research Affiliate<br/>University of British Columbia<br/>Canada</p>                                                                |
| <p>EVELYNE, BAIWY<br/>Biology of Organisms and Ecology<br/>Belgium</p>                                                                                                                  | <p>Evenhuis, Neal<br/>Entomologist<br/>Bernice Pauahi Bishop Museum<br/>United States of America (the)</p>                      | <p>Everaars, Jeroen<br/>Ecologist<br/>Helmholtz Centre for Environmental Research GmbH -<br/>UFZ<br/>Germany</p>                                            |
| <p>Everatt, Kristoffer<br/>Biologist<br/>Nelson Mandela University<br/>Mozambique</p>                                                                                                   | <p>Everett, Bernadine<br/>Scientist<br/>Oceanographic Research Institute<br/>South Africa</p>                                   | <p>Everingham, Yvette<br/>Physical Sciences<br/>James Cook University<br/>Australia</p>                                                                     |
| <p>evink, Jan<br/>Emeritus professor in landscape analysis<br/>Research Institute for Biodiversity and Ecosystem<br/>Dynamics, University of Amsterdam<br/>Netherlands (the)</p>        | <p>Evrard, August<br/>Physics and Astronomy Departments<br/>University of Michigan<br/>United States of America (the)</p>       | <p>Ewers, Robert<br/>Professor of Ecology<br/>Imperial College London<br/>United Kingdom of Great Britain and Northern Ireland<br/>(the)</p>                |
| <p>Exposito-Alonso, Moises<br/>PhD student in Ecology and Evolutionary Genomics<br/>Max Planck Institute for Developmental Biology<br/>Germany</p>                                      | <p>Eythorsson, Einar<br/>Senior researcher social science<br/>Norwegian Institute for Cultural Heritage Research<br/>Norway</p> | <p>Ezcurra, Paula<br/>Master of Advanced Studies, Climate Science and Policy<br/>Scripps Institution of Oceanography<br/>United States of America (the)</p> |
| <p>F De-Miguel, Francisco<br/>Professor of Neurosciences<br/>Universidad Nacional Autónoma de México<br/>Mexico</p>                                                                     | <p>F. Japyassú, Hilton<br/>Associate Professor<br/>Federal University of Bahia<br/>Brazil</p>                                   | <p>F.O. Miranda, Vitor *<br/>Professor<br/>University of Sao Paulo State<br/>Brazil</p>                                                                     |
| <p>Fabeiro, Concepcion<br/>Organic Farming Teacher<br/>Castilla-LA Mancha University<br/>Spain</p>                                                                                      | <p>Fabian, Jenny<br/>PhD student<br/>Leibniz Institute for freshwater ecology and inland<br/>fisheries<br/>Germany</p>          | <p>Fabregat, Carlos<br/>Associate Researcher (Botany)<br/>Jardí Botànic de la Universitat de València<br/>Spain</p>                                         |
| <p>Fabrício Neto, Ailton<br/>Post-Graduate Studen in Biological Sciences (Zoology)<br/>Universidade Estadual Paulista "Júlio de Mesquita Filho",<br/>Câmpus de Rio Claro<br/>Brazil</p> | <p>Fabricius, Katharina<br/>Senior Principal Research Scientist<br/>Australian Institute of Marine Science<br/>Australia</p>    | <p>Facciotti, Camilla<br/>PhD candidate<br/>Wageningen University<br/>Netherlands (the)</p>                                                                 |

|                                                                                                                                 |                                                                                                                                                       |                                                                                                                      |
|---------------------------------------------------------------------------------------------------------------------------------|-------------------------------------------------------------------------------------------------------------------------------------------------------|----------------------------------------------------------------------------------------------------------------------|
| Fachinelli, Natalia Pezzi<br>PhD candidate<br>Energy Planning Program at Federal University of Rio de Janeiro<br>Brazil         | Fachinger, Friederike<br>Postdoctoral Researcher, Atmospheric Sciences<br>Max Planck Institute for Chemistry<br>Germany                               | Fada, Salamatu<br>Postdoc in CEBC<br>Bangor University<br>United Kingdom of Great Britain and Northern Ireland (the) |
| Fadini, Rodrigo<br>Professor<br>Universidade Federal do Oeste do Para<br>Brazil                                                 | Fadrique, Belen<br>PhD candidate Biology<br>University of Miami<br>United States of America (the)                                                     | Fagundes, Valeria<br>Professor<br>Federal University of Espirito Santo<br>Brazil                                     |
| Fahd, Soumia<br>Full Professor<br>Université Abdelmalek Essaâdi, Faculté des Sciences de Tétouan<br>Morocco                     | Fahrig, Lenore *<br>Professor of Biology<br>Carleton University<br>Canada                                                                             | Faik, Ahmed<br>United States of America (the)                                                                        |
| Fairbairn, Andrew<br>Ornithologist<br>United Kingdom of Great Britain and Northern Ireland (the)                                | Fairfield, Alexandra<br>Professor of Biology<br>Montgomery College, Maryland<br>United States of America (the)                                        | Faithfull, Carolyn *<br>Ecology Researcher<br>Umeå University<br>Sweden                                              |
| Fajardo, Javier<br>Real Jardín Botánico<br>Spain                                                                                | Fajarnés, Susana<br>Teacher. Biologist<br>Secondary school<br>Spain                                                                                   | Falcão, Luiz<br>Professor<br>Universidade Estadual de Montes Claros<br>Brazil                                        |
| Falcão, Marcus<br>Bachelor in Biology<br>Jardim Botânico do Rio de Janeiro<br>Brazil                                            | Falcón, Luisa<br>PI Bacterial Ecology Lab<br>UNAM<br>Mexico                                                                                           | Falcón, Wilfredo<br>PhD student, MSc / Ecology<br>University of Zurich<br>Switzerland                                |
| Falisse, Elodie<br>University of Namur<br>Belgium                                                                               | Falk, Don<br>Professor, Natural Resources<br>University of Arizona, School of Natural Resources and the Environment<br>United States of America (the) | Falke, Landon<br>Research technician<br>Oregon State University<br>United States of America (the)                    |
| Fallon, Candace<br>Conservation Biologist<br>The Xerces Society for Invertebrate Conservation<br>United States of America (the) | Fallows, Ellen<br>Doctor of medicine<br>NHS<br>United Kingdom of Great Britain and Northern Ireland (the)                                             | Falótico, Tiago<br>Primatologist<br>University of São Paulo<br>Brazil                                                |
| Falster, Daniel<br>Research Fellow in Ecology<br>University of New South Wales<br>Australia                                     | Fan, Qing-Hai<br>Principal Adviser<br>New Zealand                                                                                                     | Fanan, Simone<br>PhD student<br>Federal University of Santa Catarina<br>Brazil                                       |

|                                                                                                           |                                                                                                                                                                                               |                                                                                                                         |
|-----------------------------------------------------------------------------------------------------------|-----------------------------------------------------------------------------------------------------------------------------------------------------------------------------------------------|-------------------------------------------------------------------------------------------------------------------------|
| Fandohan, Adandé Belarmain *<br>Senior lecturer / Forestry<br>Université Nationale D'Agriculture<br>Benin | Fandrem, Marte<br>Peatland Ecology<br>NTNU University Museum<br>Norway                                                                                                                        | Fanelli, Francesca<br>Researcher<br>Institute of Sciences of Food Production - National<br>Research Council<br>Italy    |
| Fang, Shu<br>Biodiversity Research Center, Academia Sinica<br>Taiwan                                      | fanin, nicolas<br>Researcher in Ecology, Soil science, Microbial Ecology<br>INRA, UMR 1391 ISPA, 71, avenue Edouard Bourlaux, CS<br>20032, F33882 Villenave-d'Ornon 9 cedex, France<br>France | FANJUL, MARIA ELISA<br>BIOLOGY<br>FUNDACION MIGUEL LILLO<br>Argentina                                                   |
| Fanoni, Federica<br>Postdoc, Mathematics<br>Germany                                                       | Farabaugh, Susan<br>Associate Director Conservation Research<br>Instute for Conservation Research,San Diego Zoo Global<br>United States of America (the)                                      | Faraci, Franco<br>Museo civico Storia naturale Verona<br>Italy                                                          |
| Farage, Nádia<br>Professora Colaboradora<br>Universidade Estadual de Campinas<br>Brazil                   | Farah, Chuck<br>Professor of Biochemistry<br>University of São Paulo<br>Brazil                                                                                                                | Farahpour, Farnoush<br>Postdoctoral researcher in Bioinformatics<br>University of Duisburg-Essen<br>Germany             |
| Fares Sabbag, Ariadne<br>PhD student, Zoology<br>UNESP, Rio Claro, SP<br>Brazil                           | Faretra, Francesco<br>Professor of Plant Pathology<br>University of Bari<br>Italy                                                                                                             | Farfán-Beltrán, Manuel Edday<br>M.S. Student. Ecology<br>Universidad Nacional Autónoma de México<br>Mexico              |
| Fargallo, Juan A.<br>Senior Researcher<br>Consejo Superior de Investigaciones Científicas (CSIC)<br>Spain | Farhang, Farnaz<br>Student<br>San Diego State University<br>United States of America (the)                                                                                                    | Faria, Deborah<br>Full professor/Ecology<br>Universidade Estadual de Santa Cruz<br>Brazil                               |
| Faria, Rogério<br>Professor of Biology<br>Universidade Federal de Mato Grosso do Sul<br>Brazil            | Faria, Rui<br>Research Fellow on Evolutionary Biology<br>Animal and Plant Sciences, University of Sheffield<br>United Kingdom of Great Britain and Northern Ireland<br>(the)                  | Farias, Allysson Allan<br>Phd Student<br>University of Sao Paulo<br>Brazil                                              |
| Farias, Izeni<br>Associate Professor<br>Universidade Federal do Amazonas<br>Brazil                        | Farias, Luciana *<br>Teacher/Envirnmental<br>Universidade Faderal de São Paulo<br>Brazil                                                                                                      | Farina, Marcelo<br>Professor on Biochemistry<br>Universidade Federal de Santa Catarina<br>Brazil                        |
| Farinaccio, Maria Ana<br>Professor<br>Brazil                                                              | Farjalla, Vinicius<br>Associate professor<br>Brazil                                                                                                                                           | Farmer, Tessa<br>Assistant Professor, Global Studies-MESALC<br>University of Virginia<br>United States of America (the) |

|                                                                                                                                               |                                                                                                                                               |                                                                                                                              |
|-----------------------------------------------------------------------------------------------------------------------------------------------|-----------------------------------------------------------------------------------------------------------------------------------------------|------------------------------------------------------------------------------------------------------------------------------|
| Faroni-Perez, Larisse<br>PhD candidate, Ecology<br>Federal University of Santa Catarina<br>Brazil                                             | Farris, Krista<br>Botanist<br>USDA Forest Service<br>United States of America (the)                                                           | Farr-Wharton, Jeremy<br>Postdoctoral Fellow in Human Computer Interaction<br>Australia                                       |
| Farwig, Nina<br>Chair for Conservation Ecology<br>University of Marburg<br>Germany                                                            | Fasanello, Vincent<br>PhD Student / Ecology & Evolution<br>Washington University in Saint Louis<br>United States of America (the)             | Fasi, John *<br>Entomology/Ecology/Environment/Conservation<br>Solomon Islands National university (SINU)<br>Solomon Islands |
| fassbender, margit *<br>mathematics and physics<br>retired<br>United Kingdom of Great Britain and Northern Ireland<br>(the)                   | Fastner, Jutta<br>Biologist<br>German Environment Agency<br>Germany                                                                           | Fastré, Constance<br>PhD student<br>University of Antwerp<br>Belgium                                                         |
| Fathpour, Nanaz<br>Fathpour<br>United States of America (the)                                                                                 | Fatima, Ema<br>Manager<br>WWF<br>India                                                                                                        | Fattebert, Julien<br>Post-doc researcher in Animal ecology<br>Swiss Ornithological Institute<br>Switzerland                  |
| Fatti, Libero<br>Emeritus Professor of Statistics<br>University of the Witwatersrand, Johannesburg<br>South Africa                            | Fauchald, Per<br>Senior Researcher, ecology<br>Norwegian Institute for Nature Research<br>Norway                                              | Faucon, Michel-Pierre<br>Associate Professor of plant ecology and agroecology<br>UniLaSalle<br>France                        |
| Fauconnet, Laurence<br>Post-doc in fisheries science<br>France                                                                                | Faugeron, Sylvain<br>PhD Evolutionary Ecology<br>Pontificia Universidad Catolica de Chile<br>Chile                                            | Faulkner, Richard<br>Australia                                                                                               |
| Faull, Dr Katherine<br>Public Health Program Director<br>Torrens University Australia<br>Australia                                            | Faure, Philip<br>Community Engagement Officer and Carnivore<br>Researcher<br>Durham University's Primate and Predator Project<br>South Africa | Fauset, Sophie<br>Research Fellow<br>University of Leeds<br>United Kingdom of Great Britain and Northern Ireland<br>(the)    |
| Faustino de Lima, Ricardo<br>Post-doc researcher<br>Centre for Ecology, Evolution and Environmental<br>Changes, Lisbon University<br>Portugal | FAUSTINO-FUSTER, DARIO R.<br>Ichthyology<br>Museo de Historia Natural Universidad Nacional Mayor<br>de San Marcos<br>Peru                     | Fava, Wellington<br>Molecular ecology<br>Federal University of Mato Grosso do Sul<br>Brazil                                  |
| Favaro, Brett<br>Research Scientist, Fisheries Science<br>Memorial University of Newfoundland<br>Canada                                       | Fawcett, Adam<br>Ecologist<br>NSW National Parks & Wildlife Service<br>Australia                                                              | Fawcett, Anne<br>Veterinarian<br>University of Sydney<br>Australia                                                           |



|                                                                                                                                                |                                                                                                                                     |                                                                                                                                                                    |
|------------------------------------------------------------------------------------------------------------------------------------------------|-------------------------------------------------------------------------------------------------------------------------------------|--------------------------------------------------------------------------------------------------------------------------------------------------------------------|
| Fay, Philip<br>Ecologist<br>USDA-ARS<br>United States of America (the)                                                                         | Fay, Scott<br>Bioinformatics Scientist<br>Invitae<br>United States of America (the)                                                 | Fayvush, Georgi<br>Head of Department of Geobotany<br>Institute of Botany NAS RA<br>Armenia                                                                        |
| Fearnside, Philip<br>Research Professor<br>National Institute for Research in Amazonia (INPA)<br>Brazil                                        | Feary, David<br>Assistant Professor<br>University of Nottingham<br>United Kingdom of Great Britain and Northern Ireland (the)       | Febbroriello, Peter *<br>Researcher<br>Research Support Group (of Torrington CT)<br>United States of America (the)                                                 |
| Fechter, Dominik<br>Wildlife Management<br>Forest Research Institute of Baden-Württemberg,<br>Germany<br>Germany                               | Federico, Felicia<br>Executive Director, California Center for Sustainable<br>Communities<br>UCLA<br>United States of America (the) | Federwisch, Luisa<br>PhD candidate (Polar Marine Ecology)<br>Alfred Wegener Institute for Polar and Marine Research<br>Germany                                     |
| Fedriani, Jose<br>Spain                                                                                                                        | Fedriani, Jose<br>Principal Investigator<br>University of Lisbon<br>Portugal                                                        | Feeley, Kenneth<br>Associate Professor, and Smathers Chair of Tropical Tree<br>Biology<br>University of Miami<br>United States of America (the)                    |
| Feener Jr., Donald H.<br>Professor of Biology<br>University of Utah<br>United States of America (the)                                          | Feeney, Ann<br>Professor, Department of Immunology<br>The Scripps Research Institute<br>United States of America (the)              | Feeney, Richard<br>Collection Manager/ Ichthyology<br>Natural History Museum of Los Angeles County<br>United States of America (the)                               |
| Feffer, Andrew<br>Professor, History<br>Union College<br>United States of America (the)                                                        | Feinberg, Aryeh<br>Doctoral Researcher in Atmospheric Science<br>ETH Zürich<br>Switzerland                                          | Feinsinger, Peter<br>Adjunct Professor of Biology / conservation biology,<br>ecology<br>Northern Arizona University<br>United States of America (the)              |
| Feis, Marieke<br>PhD candidate, Evolutionary Biology<br>Alfred Wegener Institute, Helmholtz Centre for Polar and<br>Marine Research<br>Germany | Feitosa, Rodrigo<br>Professor - Entomology<br>Universidade Federal do Paraná<br>Brazil                                              | Felde, Vincent<br>Postdoctoral researcher in Soil Science<br>Department of Soil Science, Faculty of Organic<br>Agricultural Sciences, Kassel University<br>Germany |
| Feldhaar, Heike<br>Professor Animal Ecology<br>University of Bayreuth<br>Germany                                                               | Feldman, Chris<br>Assistant Professor of Biology<br>University of Nevada, Reno<br>United States of America (the)                    | Feldman, Tracy<br>Assistant Professor of Biology<br>St. Andrews University--a branch of Webber International<br>University<br>United States of America (the)       |

|                                                                                                                              |                                                                                                              |                                                                                                                                |
|------------------------------------------------------------------------------------------------------------------------------|--------------------------------------------------------------------------------------------------------------|--------------------------------------------------------------------------------------------------------------------------------|
| Feldmann, Eike<br>PhD-Student, Forest Ecology<br>University of Goettingen<br>Germany                                         | Feldmeier, Stephan<br>PhD candidate biogeography<br>Trier university<br>Germany                              | Feldmeyer, Barbara<br>Scientist<br>Senckenberg Biodiversity and Climate Research Centre<br>Germany                             |
| Felipe-Lucia, María<br>Postdoc in Ecology<br>University of Bern<br>Switzerland                                               | Felix Hackradt, Fabiana<br>Adjunct Professor<br>Universidade Federal do Sul da Bahia<br>Brazil               | Felling, Sven<br>Ecology<br>Netherlands (the)                                                                                  |
| Fellous, Simon<br>Researcher in biological sciences<br>INRA<br>France                                                        | Felmy, Anja<br>PhD-Student in Evolutionary Biology<br>EAWAG and ETH Zurich<br>Switzerland                    | Feng, Yanhao<br>Postdoc<br>German Centre for Integrative Biodiversity Research<br>(iDiv) Halle-Jena-Leipzig<br>Germany         |
| Fenker, Jessica<br>PhD student<br>Australian National University<br>Australia                                                | Fenoglio, Stefano<br>Professor Ecology<br>Università del Piemonte Orientale<br>Italy                         | Fent, Karl<br>Professor of Ecotoxicology<br>University of Applied Sciences and Arts Northwestern<br>Switzerland<br>Switzerland |
| Feoktistova, Natalia<br>Biologist, Dr. of science<br>Seversov Institute of Ecology and Evolution<br>Russian Federation (the) | Feo-Quer, Carles<br>Conservation Biologist<br>ConSORCI de l'Estany, Banyoles<br>Spain                        | Ferchaud, Anne-Laure<br>Post-doc<br>Laval University<br>Canada                                                                 |
| FERCHAUD, Fabien<br>Research Engineer in agronomy<br>INRA<br>France                                                          | Fernandes, Alessandra<br>Professor/ Student PhD - University of Coimbra<br>IF SUDESTE MG<br>Brazil           | Fernandes, Daniell Rodrigo Rodrigues<br>Postdoctoral Researcher<br>Instituto Nacional de Pesquisas da Amazônia<br>Brazil       |
| Fernandes, Geraldo *<br>Professor/Ecology<br>Universidade Federal de Minas Gerais<br>Brazil                                  | Fernandes, Paulo<br>Associate Professor, Forestry<br>University of Trás-os-Montes and Alto Douro<br>Portugal | Fernandes, Sidney *<br>Botany teacher<br>UNIP - Universidade Paulista<br>Brazil                                                |
| Fernandes Lima, Duane<br>PhD student<br>Universidade Estadual de Campinas<br>Brazil                                          | FERNANDES LIMA LUCIANO, BEATRIZ<br>MESTRANDA<br>UNESC<br>Brazil                                              | Fernandes-Ferreira, Hugo<br>Professor of Zoology<br>Universidade Estadual do Ceará<br>Brazil                                   |
| Fernandez, Diana<br>PhD student<br>University of Windsor<br>Canada                                                           | Fernandez, Fernando<br>Full Professor of Ecology<br>Universidade Federal do Rio de Janeiro<br>Brazil         | FERNANDEZ, JOSE LUIS<br>CHEMIST<br>Spain                                                                                       |

|                                                                                                                                       |                                                                                                                          |                                                                                                                                                   |
|---------------------------------------------------------------------------------------------------------------------------------------|--------------------------------------------------------------------------------------------------------------------------|---------------------------------------------------------------------------------------------------------------------------------------------------|
| Fernandez, Laura<br>PhD student in Biology<br>Macquarie University<br>Australia                                                       | Fernandez, Leyden<br>PhD student (Ecology and Genetics)<br>Uppsala University<br>Sweden                                  | Fernandez, Pablo<br>Director<br>Climate-Link<br>Switzerland                                                                                       |
| Fernández, Denny<br>Professor - Ecology<br>University of Puerto Rico<br>Puerto Rico                                                   | Fernández, Luis A.<br>Professor, Analytical Chemistry<br>University of The Basque Country<br>Spain                       | Fernández, Mariana<br>Organic Chemistry Professor- Researcher<br>Universidad Nacional de Córdoba<br>Argentina                                     |
| Fernández, Néstor<br>Researcher in Biodiversity Conservation<br>German Centre for Integrative Biodiversity Research - iDiv<br>Germany | Fernández, Rosa<br>Postdoctoral Fellow<br>Center for Genomic Regulation<br>Spain                                         | Fernández Cordeiro, Antonio<br>PhD Biology / Environmental inspector<br>Consellería de Medio Ambiente Galicia<br>Spain                            |
| Fernández Freire, Paloma<br>Associate Professor Cell Biology<br>Faculty of Science, Universidad Autónoma de Madrid<br>Spain           | Fernández Lozada, Sergio<br>PhD candidate: Resource and Environmental<br>Management<br>Simon Fraser University<br>Canada | Fernández Ruiz, Carlos<br>PhD Student<br>Universidad Autónoma de Madrid - Chemical Engineering<br>Section<br>Spain                                |
| Fernández Valiente, Eduardo<br>Professor / Plant Physiology<br>Autonomous University of Madrid<br>Spain                               | Fernández-Álvarez, Fernando Ángel<br>PHD Student<br>Institut de Ciències del Mar (CSIC)<br>Spain                         | Fernández-Gil, Alberto<br>PhD/ Conservation Biology<br>Estación Biológica de Doñana (Consejo Superior de<br>Investigaciones Científicas)<br>Spain |
| Fernández-Llamazares, Álvaro<br>Post-doctoral researcher<br>University of Helsinki<br>Finland                                         | Fernandez-Manjarres, Juan<br>Researcher<br>CNRS<br>France                                                                | Fernández-Martínez, Marcos<br>Researcher in ecology<br>CREAF<br>Spain                                                                             |
| Fernández-Méndez, Celia<br>Spain                                                                                                      | Fernández-Palacios, José María<br>Ecology Professor<br>La Laguna University<br>Spain                                     | Fernández-Pérez, Laura<br>PhD Student Forest Ecology<br>Universidad de Alcalá<br>Spain                                                            |
| fernandez-Piñas, Francisca<br>Professor<br>Universidad Autonoma de Madrid<br>Spain                                                    | Fernandez-Silva, Iria<br>Research Scientist — Marine biology<br>Universidad de Vigo<br>Spain                             | Ferner, Jessica<br>PhD student in Geography<br>Geographical Institute at the University of Bonn<br>Germany                                        |
| Fernholm, Bo<br>Professor emeritus<br>Swedish Museum of Natural History<br>Sweden                                                     | FERRANDIS, PABLO<br>Assistant Professor/Ecology<br>University of Castilla-La Mancha<br>Spain                             | Ferrandiz-Rovira, Mariona<br>Postdoc - Ecology<br>Universitat Autònoma de Barcelona<br>Spain                                                      |

|                                                                                                            |                                                                                                                                                                                                           |                                                                                                                                                       |
|------------------------------------------------------------------------------------------------------------|-----------------------------------------------------------------------------------------------------------------------------------------------------------------------------------------------------------|-------------------------------------------------------------------------------------------------------------------------------------------------------|
| Ferrari, Augusto<br>associate professor<br>Universidade Federal do Rio Grande - FURG<br>Brazil             | Ferrari, Fabricio<br>Universidade Federal do Rio Grande<br>Brazil                                                                                                                                         | FERRARI, NORA BEATRIZ<br>PSICOLOGA SOCIAL/ PSICOPEDAGOGA<br>Argentina                                                                                 |
| Ferrari, Rafael<br>Professor<br>University of Campinas<br>Brazil                                           | Ferrari Legorreta, Renata<br>Marine Ecologist<br>The University of Sydney<br>Mexico                                                                                                                       | Ferrario Bazalar, Valeria Paloma<br>Master student in Plant Physiology<br>University of São Paulo<br>Brazil                                           |
| Ferraz, Isolde<br>Senior Scientist - Biology<br>National Institute for Amazonian Research (INPA)<br>Brazil | Ferraz, Silvio<br>Professor<br>University of São Paulo<br>Brazil                                                                                                                                          | Ferreira, Andre *<br>Biologist<br>Portugal                                                                                                            |
| Ferreira, Bruno<br>PhD Candidate - Plant Biology<br>Universidade Federal de Minas Gerais<br>Brazil         | FERREIRA, CARLOS EDUARDO<br>Associated professor<br>Universidade Federal Fluminense<br>Brazil                                                                                                             | Ferreira, Catarina<br>Postdoctoral Fellow - Conservation Biology<br>UFZ - Helmholtz-Centre for Environmental Research,<br>Leipzig, Germany<br>Germany |
| Ferreira, Débora<br>Ecology<br>INPA<br>Brazil                                                              | Ferreira, Efrem<br>Senior Scientist - Ichthyologist<br>Instituto Nacional de Pesquisas da Amazonia (INPA)<br>Brazil                                                                                       | Ferreira, Felipe<br>MSc in Tropical Forest Sciences<br>INPA<br>Brazil                                                                                 |
| Ferreira, Gabriel Emiliano<br>PhD candidate<br>National Institute of Amazonian Research<br>Brazil          | Ferreira, Guilherme<br>Ecologist and PhD student<br>University College London, Zoological Society of London<br>and Instituto Biotropicos<br>United Kingdom of Great Britain and Northern Ireland<br>(the) | Ferreira, Harildon<br>Phd Candidate<br>Universidade Estadual de Santa Cruz<br>Brazil                                                                  |
| Ferreira, Helena<br>Portugal                                                                               | Ferreira, Leila da Costa<br>Full Professor in Environmental Sociology<br>Campinas State University<br>Brazil                                                                                              | Ferreira, Luane<br>Ph.D. student<br>UFRN-Laboratory of Bioacoustics<br>Brazil                                                                         |
| Ferreira, Marcelo<br>Professor<br>University of São Paulo<br>Brazil                                        | Ferreira, Mário<br>PhD Student<br>CIBIO/Inbio University of Porto<br>Portugal                                                                                                                             | Ferreira, Marta<br>Senior Lecturer<br>The University of the South Pacific<br>Fiji                                                                     |
| Ferreira, Rogério<br>Portugal                                                                              | FERREIRA, SILVANEY<br>Chemical Engineer<br>Universidade Federal de São Paulo<br>Brazil                                                                                                                    | Ferreira, Sofia<br>Postdoc in Marine Ecology<br>University of Wahsington<br>United States of America (the)                                            |

|                                                                                                                                           |                                                                                                                                                                                                        |                                                                                                               |
|-------------------------------------------------------------------------------------------------------------------------------------------|--------------------------------------------------------------------------------------------------------------------------------------------------------------------------------------------------------|---------------------------------------------------------------------------------------------------------------|
| Ferreira, Verónica<br>Researcher in Stream Ecology<br>University of Coimbra<br>Portugal                                                   | Ferreira da Silva, Maria Joana<br>Posdoc researcher, Conservation Genetics<br>CIBIO- Porto University<br>Portugal                                                                                      | Ferreira dos Santos, Marcela Maria *<br>Professora<br>CEI Municipal Angelina Leandro Eiras<br>Brazil          |
| Ferreira Gomes, Marta<br>PhD Student in Biology<br>Friedrich Schiller University Jena<br>Germany                                          | Ferreira Junior, Nelson<br>Associate Professor of Zoology<br>Universidade Federal do Rio de Janeiro<br>Brazil                                                                                          | Ferreira Pires, Cristiane Aparecida<br>Biologist<br>Instituto Butantan<br>Brazil                              |
| FERREIRA-GONCALVES, Joao<br>Biologist<br>Portugal                                                                                         | Ferrenberg, Scott<br>Assistant Professor of Biology<br>New Mexico State University<br>United States of America (the)                                                                                   | Ferreras, Pablo<br>Scientific Research<br>CSIC - Spanish Research Council<br>Spain                            |
| Ferrero, Victoria<br>Postdoctoral researcher<br>Centre for Functional Ecology, University of Coimbra<br>Portugal                          | Ferretti, Marco<br>Forest Resiurces and Management<br>Swiss Federal Institute for Forest, Snow and Landscape<br>Research WSL<br>Switzerland                                                            | Ferriere, Regis<br>Professor, Biology<br>Ecole Normale Supérieure and University of Arizona<br>France         |
| Ferris, Joseph S<br>Director/ Senior Ecologist<br>ECAP Consultancy Group<br>United Kingdom of Great Britain and Northern Ireland<br>(the) | Ferro Lozano, Natalie<br>MSc Plant Biotechnology<br>Wageningen University and Research Center<br>Netherlands (the)                                                                                     | Ferru-González, Marcos<br>Biologist<br>Centro de Muestreo y Análisis Biológico CeMABio<br>Chile               |
| Ferse, Sebastian<br>associate researcher, marine ecology<br>Leibniz Center for Tropical Marine Research<br>Germany                        | Ferwerda, Jelle<br>Spatial Sciences & Ecology<br>University of Twente<br>Netherlands (the)                                                                                                             | Fettweis, Michael<br>Marine Geologist<br>Royal Belgian Institute of Natural Sciences<br>Belgium               |
| Feurstein, Claudia *<br>Biotechnology<br>TU Berlin<br>Germany                                                                             | Fewings, Jason<br>Senior Metallurgist. BSc Chemistry, Mineral Science,<br>Process Control, Hons. Mineral Science, PGradDip Project<br>Management<br>Murdoch University, Curtin University<br>Australia | Fewster, Rachel<br>Associate Professor, Statistics<br>University of Auckland<br>New Zealand                   |
| Ficetola, Gentile Francesco<br>Associate Professor, Zoology<br>Università degli Studi di Milano<br>Italy                                  | Fichberg, Ilana<br>Teacher/Zoology<br>Universidade Federal de São Paulo<br>Brazil                                                                                                                      | Fichera, Giovanni<br>Research Technician/Health & Biosecurity/Managing<br>Weeds Species<br>CSIRO<br>Australia |

|                                                                                                                                        |                                                                                                                                                      |                                                                                                                     |
|----------------------------------------------------------------------------------------------------------------------------------------|------------------------------------------------------------------------------------------------------------------------------------------------------|---------------------------------------------------------------------------------------------------------------------|
| Fiebrig, Immo<br>Research Fellow Permaculture Systems<br>Coventry University's Centre for Agroecology, Water and Resilience<br>Germany | Fiedler, Konrad<br>Full Professor, Animal Ecology & Biodiversity Research<br>University of Vienna<br>Austria                                         | Field, Katharine<br>Professor, Microbiology<br>Oregon State University<br>United States of America (the)            |
| Fiesler, Emile<br>Bioveyda Biodiversity Inventories<br>United States of America (the)                                                  | Fievet, Virgil<br>Associate Professor<br>University of Bordeaux<br>France                                                                            | Fifer, James<br>Masters student Biology<br>University of Guam<br>Guam                                               |
| Figueira, Daniel<br>Brazil                                                                                                             | Figueira de Morisson Faria, Dr Carla<br>Reader in Physics<br>University College London<br>United Kingdom of Great Britain and Northern Ireland (the) | Figueiredo, Estrela<br>Honorary Professor<br>Nelson Mandela Metropolitan University<br>South Africa                 |
| Figueiredo, Gisela<br>Lecturer/ Marine Biology<br>Federal University of Rio de Janeiro<br>Brazil                                       | Figueroa, Neus<br>Marine Scientist<br>CSIC<br>Spain                                                                                                  | Figueroa, Rodrigo<br>Graduate student - Ecology and Evolution<br>Universidade do Estado do Rio de Janeiro<br>Brazil |
| Figueroa Jara, Ricardo<br>Academic<br>Concepción University, Environmental Sciences Faculty<br>Chile                                   | Figueroa-Castro, Dulce<br>Benemérita Universidad Autónoma de Puebla<br>Mexico                                                                        | Figueroa, Blanca<br>Postdoctoral Fellow<br>Smithsonian Tropical Research Institute (STRI)<br>Panama                 |
| Figuet, Emeric<br>PhD student<br>ISEM (Institute of Evolutionary Sciences of Montpellier)<br>France                                    | Figus, Elizabeth<br>Fisheries PhD Candidate<br>University of Alaska Fairbanks<br>United States of America (the)                                      | Filardi, Fabiana<br>Botany<br>Jardim Botânico do Rio de Janeiro<br>Brazil                                           |
| Fileman, Tim<br>Marine Scientist<br>Plymouth Marine Laboratory<br>United Kingdom of Great Britain and Northern Ireland (the)           | Filgueira Jorge, Rafael<br>Biologist/Researcher<br>Instituto Nacional de Pesquisas da Amazônia<br>Brazil                                             | Filgueiras, Tarciso<br>Professor/Botany<br>Instituto de Botânica, São Paulo<br>Brazil                               |
| Filipe, Ana Filipa<br>Researcher (PostDoc)<br>CIBIO/InBIO, University of Porto<br>Portugal                                             | Filla, Marc<br>Research Fellow<br>Georg-August-University Göttingen<br>Germany                                                                       | Fillinger, Lucas<br>Germany                                                                                         |

|                                                                                                                 |                                                                                                                                                |                                                                                                                                                              |
|-----------------------------------------------------------------------------------------------------------------|------------------------------------------------------------------------------------------------------------------------------------------------|--------------------------------------------------------------------------------------------------------------------------------------------------------------|
| Filshie, Barry<br>Executive Secretary Research Committee<br>Hermon Slade Foundation<br>Australia                | Findley, Lloyd<br>Profesor/Investigador Titular<br>Centro de Investigacion en Alimentacion y Desarrollo, A.C.<br>Mexico                        | Finke, Peter<br>Professor Soil Science<br>Ghent University<br>Belgium                                                                                        |
| Finley, Nina<br>Ecology<br>Thomas J. Watson Foundation<br>United States of America (the)                        | Finn, Hugh<br>Lecturer<br>Curtin University<br>Australia                                                                                       | Fiore, Gianluca<br>Scientific Officer of Joint Research Centre<br>EU Commission<br>Italy                                                                     |
| Fiore-Donno, Anna Maria<br>Biologist<br>University of Cologne<br>Germany                                        | Firstater, Fausto<br>CONICET<br>Argentina                                                                                                      | Firth, Ronald<br>Ecologist<br>Charles Darwin University<br>Australia                                                                                         |
| Fischer, Anke<br>United Kingdom of Great Britain and Northern Ireland<br>(the)                                  | Fischer, Christiane<br>Scientific Coordinator<br>Senckenberg Gesellschaft fuer Naturforschung<br>Germany                                       | Fischer, Erich<br>Titular Professor - Ecology<br>Universidade Federal de Mato Grosso do Sul<br>Brazil                                                        |
| Fischer, Jennifer<br>Landscape Planning<br>University of Natural Resources and Life Sciences, Vienna<br>Austria | Fischer, Manfred A.<br>professor of botany<br>University of Vienna, Austria<br>Austria                                                         | Fischer, Melissa<br>Forest Entomologist<br>Washington State Department of Natural Resources<br>United States of America (the)                                |
| Fischer, Nicola<br>MSc Biologist<br>University of Greifswald<br>Germany                                         | Fischer, Stefan<br>Postdoctoral Research Associate<br>University of Liverpool<br>United Kingdom of Great Britain and Northern Ireland<br>(the) | Fischer, Tim<br>GEOMAR Kiel<br>Germany                                                                                                                       |
| Fisher, Adrian<br>Researcher in Geography<br>The University of Queensland<br>Australia                          | Fisher, Alina<br>Research Manager<br>University of Victoria<br>Canada                                                                          | Fisher, Danielle<br>Engagement Specialist<br>National Geographic Society<br>United States of America (the)                                                   |
| Fisher, Diana<br>Associate Professor, Biological Sciences<br>University of Queensland<br>Australia              | Fisher, Jason<br>Senior Research Scientist & Adjunct Professor, Wildlife<br>Ecology<br>InnoTech Alberta & University of Victoria<br>Canada     | Fisher, Luke<br>Lecturer for Clinical Legal Education, and Solicitor<br>Plymouth University<br>United Kingdom of Great Britain and Northern Ireland<br>(the) |

|                                                                                                                                                       |                                                                                                                                                                                  |                                                                                                                                                                                 |
|-------------------------------------------------------------------------------------------------------------------------------------------------------|----------------------------------------------------------------------------------------------------------------------------------------------------------------------------------|---------------------------------------------------------------------------------------------------------------------------------------------------------------------------------|
| Fisher, Mark<br>Research Associate<br>Wildland Research Institute, University of Leeds<br>United Kingdom of Great Britain and Northern Ireland (the)  | Fisher, Matthew<br>Masters Student<br>University of Pretoria<br>South Africa                                                                                                     | Fisher, Michael<br>Emeritus Professor (in Physics, Chemistry, and Biophysics)<br>University of Maryland {also Emeritus at Cornell University}<br>United States of America (the) |
| Fisher, Penny<br>Wildlife Ecology and Management<br>Landcare Research<br>New Zealand                                                                  | Fisk, Martin<br>Professor Emeritus<br>Oregon State University<br>United States of America (the)                                                                                  | Fiskesjö, Magnus<br>Associate professor of Anthropology<br>Cornell University<br>United States of America (the)                                                                 |
| Fisogni, Alessandro<br>Postdoc - Pollination Ecology<br>Université de Lille - Sciences et Technologies<br>France                                      | Fitze, Patrick S.<br>senior scientist<br>Museo Nacional de Ciencias Naturales (MNCN) - Consejo Superior de Investigaciones Científicas (CSIC)<br>Spain                           | Fitzpatrick, Luisa<br>Evolutionary Biology PhD Candidate<br>University of Tasmania<br>Australia                                                                                 |
| Fitzsimmons, Kathryn<br>Earth sciences<br>Max Planck Institute for Chemistry<br>Germany                                                               | Fitzsimmons, Kevin<br>Professor of Environmental Science<br>University of Arizona<br>United States of America (the)                                                              | Fitzsimmons, Owen<br>Wildlife Biologist<br>United States of America (the)                                                                                                       |
| Fiuza de Melo, Maria Margarida<br>Associate Research. Editor-in-Chief of Hoehnea, Journal of Instituto de Botânica<br>Instituto de Botânica<br>Brazil | Flanagan, Christine<br>Plant Sciences Educator<br>U S Botanic Garden (retired)<br>United States of America (the)                                                                 | Flantua, Suzette<br>Research associate<br>University of Amsterdam<br>Netherlands (the)                                                                                          |
| Flather, Cortney<br>Field Technician<br>UC Davis<br>United States of America (the)                                                                    | Flather, Curtis<br>Research Ecologist<br>U.S. Forest Service, Rocky Mountain Research Station<br>United States of America (the)                                                  | Flaxman, Sam<br>Associate Professor<br>University of Colorado Boulder<br>United States of America (the)                                                                         |
| Flayhan, Ali<br>Postdoctoral researcher Biochemistry/Structural biology<br>EMBL<br>Germany                                                            | Fleischmann, Andreas<br>Curator and Research Scientist<br>Botanische Staatssammlung München, Munich<br>Germany                                                                   | Fleischner, Thomas<br>Executive Director<br>Natural History Institute<br>United States of America (the)                                                                         |
| Fleishman, Abram<br>Senior Analyst<br>Conservation Metrics, Inc.<br>United States of America (the)                                                    | Fleituch, Tadeusz<br>Professor, DSc/Freshwater Ecology, Hydrobiology<br>Department of Freshwater Biology, Institute of Nature Conservation, Polish Academy of Sciences<br>Poland | Fleming, Aysha<br>Research scientist/social science<br>Australia                                                                                                                |



|                                                                                                                              |                                                                                                                                                                                      |                                                                                                      |
|------------------------------------------------------------------------------------------------------------------------------|--------------------------------------------------------------------------------------------------------------------------------------------------------------------------------------|------------------------------------------------------------------------------------------------------|
| Fleming, Jory<br>Environmental Change & Management MPhil Candidate<br>University of Oxford<br>United States of America (the) | Fleming, Kelly<br>Environmental Health Sciences<br>University of South Carolina<br>United States of America (the)                                                                    | Flemming, Hans-Curt<br>Professor emeritus<br>Biofilm Centre, University of Duisburg-Essen<br>Germany |
| Flesch, Aaron<br>Research Scientist<br>University of Arizona<br>United States of America (the)                               | Fletcher, David<br>Associate Professor in Statistics<br>University of Otago<br>New Zealand                                                                                           | Fletcher, Garry<br>education<br>Lester B. Pearson College.. retired<br>Canada                        |
| Fletcher, George<br>Biologist<br>Red de Guardianes de Semillas (RGS)<br>Ecuador                                              | Fletcher, Lynn<br>Associate Professor of Biology<br>Salem State University<br>United States of America (the)                                                                         | Fletcher, Murray<br>Visiting Scientist, Entomology<br>Orange Agricultural Institute<br>Australia     |
| Fleurbaey, Hélène<br>Ph.D. student in Physics<br>Laboratoire Kastler Brossel, ENS/UPMC, Paris<br>France                      | Fleurbaey, Marc<br>Woodrow Wilson School<br>Princeton<br>United States of America (the)                                                                                              | Fleury, Beatriz<br>Brazil                                                                            |
| Fleury, Marina<br>Research Fellow, biological conservation<br>Universidad de Chile<br>Chile                                  | Flick, Brigitta<br>Social Psychologist<br>James Cook University, The Cairns Institute<br>Australia                                                                                   | Flo, Eva<br>Marine biologist<br>Institute of Marine Science (ICM-CSIC)<br>Spain                      |
| FLOC'H, Jean-Baptiste<br>Microbial Ecology<br>University of Montreal<br>Canada                                               | Flockhart, Tyler<br>Assistant Professor, Ecology<br>University of Maryland Center for Environmental Science -<br>Appalachian Laboratory<br>United States of America (the)            | Floeter, Sergio<br>Professor<br>Universidade Federal de Santa Catarina<br>Brazil                     |
| Flohr, Gretchen<br>Research Scientist - Organismal Biology<br>SIU<br>United States of America (the)                          | Florczyk, Aneta Jadwiga<br>Scientific Officer<br>European Commission, Joint Research Centre (JRC)<br>Italy                                                                           | Florec, Veronique<br>Research economist<br>The University of Western Australia<br>Australia          |
| Florek, Stan<br>archaeology - anthropology<br>Australian Museum<br>Australia                                                 | Florencio, Margarita<br>Postdoctoral Researcher<br>Departamento de Ecologia, Instituto de Ciências<br>Biológicas, Universidade Federal de Goiás, Goiânia, Goiás,<br>Brazil<br>Brazil | FLORENS, Vincent<br>Associate Professor of Ecology<br>University of Mauritius<br>Mauritius           |
| Flores, Adriana<br>PhD student<br>University Autonomous of Queretaro<br>Mexico                                               | Flores, Marcelo<br>Doctorado en Medicina de la Conservación, Facultad de<br>Ecología y Recursos Naturales<br>Universidad Andres Bello<br>Chile                                       | Flores, Olivier<br>Lecturer in Ecology and Statistics<br>University of La Réunion - CIRAD<br>Réunion |

|                                                                                                                                                              |                                                                                                                                          |                                                                                                                                                       |
|--------------------------------------------------------------------------------------------------------------------------------------------------------------|------------------------------------------------------------------------------------------------------------------------------------------|-------------------------------------------------------------------------------------------------------------------------------------------------------|
| Flores Soto, Víctor Hugo<br>PhD Student<br>UNAM<br>Mexico                                                                                                    | Flores-Villela, Oscar<br>Biology, Zoology<br>National Autonomous University of Mexico, UNAM<br>Mexico                                    | Floriano, Belen<br>Spain                                                                                                                              |
| Florín, Máximo<br>Associate Professor Environmental Technologies<br>University of Castilla-la Mancha<br>Spain                                                | Flower, Emily<br>Environmental Science<br>Griffith University<br>Australia                                                               | Flowerdew, John<br>University Lecturer, retired (Ecology)<br>University of Cambridge<br>United Kingdom of Great Britain and Northern Ireland<br>(the) |
| Flueck, Werner<br>Senior Scientist<br>National Scientific and Technical Research Council,<br>Argentina; Swiss Tropical Health Inst, Univ. Basel<br>Argentina | Foden, Wendy<br>Senior Researcher<br>University of Stellenbosch<br>South Africa                                                          | Foell, Melanie C.<br>PhD Student, biology<br>University of Freiburg<br>Germany                                                                        |
| Fogell, Daniel<br>Instructor, Life and Human Sciences<br>Southeast Community College, Lincoln, Nebraska<br>United States of America (the)                    | Foggo, Andy<br>Associate Professor in Ecology<br>University of Plymouth<br>United Kingdom of Great Britain and Northern Ireland<br>(the) | Fogliani, Bruno<br>Deputy director<br>New Caledonian Agronomic Institute<br>New Caledonia                                                             |
| Foil, Daniel<br>PhD Student, Marine Natural Products Chemistry<br>GEOMAR-Helmholtz Centre for Ocean Research Kiel<br>Germany                                 | Fois, Mauro<br>PhD<br>University of Cagliari, Dept. of Life Sciences and<br>Environment<br>Italy                                         | Földvari, Mihaly<br>researcher, zoology<br>Sweden                                                                                                     |
| Foley, Catherine<br>Stony Brook University<br>United States of America (the)                                                                                 | Folhas, Henrique<br>Marine Researcher<br>MARE-ISPA<br>Portugal                                                                           | Folt, Brian *<br>Ecologist<br>Organization for Tropical Studies<br>Costa Rica                                                                         |
| Foltz Jordan, Sarah<br>Pollinator Conservationist<br>Xerces Society<br>United States of America (the)                                                        | Fondahl, Gail<br>Professor, Geography<br>University of Northern British Columbia<br>Canada                                               | Fondario Grubbs, Laura<br>Microbiology/Biotechnology Lab Manager<br>UNCG<br>United States of America (the)                                            |
| Fonseca, Alesssandra Larissa<br>Professor<br>Universidade Federal de Santa Catarina<br>Brazil                                                                | Fonseca, Ana<br>Emergy Evaluation,<br>ICAAM- Instituto de Ciências Agrárias e Ambientais<br>Mediterrânicas<br>Portugal                   | Fonseca, Carlos Roberto<br>Professor in Ecology<br>Universidade Federal do Rio Grande do Norte<br>Brazil                                              |
| Fonseca, Emanuel<br>Universidade Federal do Rio Grande do Norte<br>Brazil                                                                                    | Fonseca, Érica<br>Phd student<br>Universidade Federal de Santa Maria<br>Brazil                                                           | Font, Toni<br>Spain                                                                                                                                   |

|                                                                                                                                                          |                                                                                                                                                                                            |                                                                                                                                |
|----------------------------------------------------------------------------------------------------------------------------------------------------------|--------------------------------------------------------------------------------------------------------------------------------------------------------------------------------------------|--------------------------------------------------------------------------------------------------------------------------------|
| Fontaine, Benoît<br>Research engineer<br>Muséum national d'Histoire naturelle, Paris<br>France                                                           | Fontaine, Sandrine<br>Engineer Ecology<br>CNRS<br>France                                                                                                                                   | Fontaneto, Diego<br>researcher, animal ecology<br>National Research Council of Italy, Institute of Ecosystem<br>Study<br>Italy |
| Fontcuberta, Amaranta<br>PhD student<br>University of Lausanne<br>Switzerland                                                                            | Fontenele, Laryany<br>Professora de Biologia<br>IFPA<br>Brazil                                                                                                                             | Fontenele-Araujo, John *<br>Full Professor<br>UFRN<br>Brazil                                                                   |
| Fontes, Marco Aurélio<br>Associate Professor - Ecology<br>Federal University of Lavras<br>Brazil                                                         | Fontes, Paulo<br>Investigador colaborador<br>CICP - Centro de Investigação em Ciência Política<br>Portugal                                                                                 | Fonti, Viviana<br>Research Fellow<br>University of Exeter<br>United Kingdom of Great Britain and Northern Ireland<br>(the)     |
| Fontoura, Carlos<br>Teacger<br>Prefeitura Municipal de Santos<br>Brazil                                                                                  | Fontoura, Nelson<br>Professor<br>PUCRS<br>Brazil                                                                                                                                           | Fontoura, Talita<br>Professor/Ecology<br>Universidade Estadual de Santa Cruz<br>Brazil                                         |
| Foo, Eloise<br>Senior Lecturer Biological Sciences<br>University of Tasmania<br>Australia                                                                | Foon, Junn Kitt<br>Research Associate; MSc student, Biodiversity and<br>Biosystematics<br>Rimba; Institute for Tropical Biology and Conservation,<br>Universiti Malaysia Sabah<br>Malaysia | Foord, Stefan<br>Ecologist<br>University of Venda<br>South Africa                                                              |
| Foot, Jaelle<br>Phage Display Scientist<br>Adaptimmune<br>Germany                                                                                        | Foote, Andrew<br>Biologist<br>Bangor University<br>United Kingdom of Great Britain and Northern Ireland<br>(the)                                                                           | Foot-Hardman, Francisco<br>Full Professor of Literature and Other Cultural<br>Productions<br>State University of<br>Brazil     |
| Foran, John<br>Professor of Sociology and Environmental Studies<br>UC Santa Barbara<br>United States of America (the)                                    | Forbanka, Derick<br>Zoologist<br>South Africa                                                                                                                                              | Forbes, Anthony<br>Honorary Professor - Estuarine ecology<br>University of KwaZulu-Natal<br>South Africa                       |
| Forbes, Elizabeth<br>PhD candidate in Ecology, Evolution, and Marine Biology<br>University of California Santa Barbara<br>United States of America (the) | Forbes, William<br>Associate Professor of Geography<br>United States of America (the)                                                                                                      | Force, Aisling<br>Project Development Coordinator<br>Adventure Scientists<br>United States of America (the)                    |

|                                                                                                                                           |                                                                                                                                |                                                                                                                                                             |
|-------------------------------------------------------------------------------------------------------------------------------------------|--------------------------------------------------------------------------------------------------------------------------------|-------------------------------------------------------------------------------------------------------------------------------------------------------------|
| Ford, Alex<br>Professor of Biology<br>University of Portsmouth<br>United Kingdom of Great Britain and Northern Ireland (the)              | Ford, Amber<br>United States of America (the)                                                                                  | Ford, Hilary<br>Ecologist<br>Bangor University<br>United Kingdom of Great Britain and Northern Ireland (the)                                                |
| Ford, Sophia<br>Michigan Technological University<br>United States of America (the)                                                       | Fordham, Barry<br>Earth Sciences<br>Australian National University<br>Australia                                                | Ford-Werntz, Donna<br>Assoc. Prof. Biol./Herbarium Curator<br>West Virginia University<br>United States of America (the)                                    |
| Fordyce, Alexander<br>Research Assistant<br>ARC Centre of Excellence for Coral Studies<br>Australia                                       | FOREL, Marie-Béatrice<br>Assistant Professor - Micropaleontology<br>Muséum national d'Histoire naturelle<br>France             | Foreman, Gabe<br>Marine Research Engineer<br>University of Hawaii<br>United States of America (the)                                                         |
| Forero, German<br>PhD Ecology<br>Colombia                                                                                                 | Forest, Katrina<br>Professor of Bacteriology<br>University of Wisconsin-Madison<br>United States of America (the)              | Forester, Brenna<br>Postdoctoral Research Fellow<br>Colorado State University<br>United States of America (the)                                             |
| Forêt, Philippe<br>Professor / Geography<br>Nazarbayev University<br>Kazakhstan                                                           | Forget, Nathalie<br>Research scientist in Marine Biology<br>Fisheries and Oceans Canada<br>Canada                              | Forget, Pierre-Michel<br>Professor, Tropical Ecology<br>Muséum National Histoire Naturelle<br>France                                                        |
| Forister, Matthew<br>Associate Professor of Biology<br>University of Nevada, Reno<br>United States of America (the)                       | Forman, Dan<br>Ecologist / Senior lecturer<br>Swansea University<br>United Kingdom of Great Britain and Northern Ireland (the) | Formato, Giovanni *<br>Head of Apiculture Laboratory<br>Istituto Zooprofilattico Sperimentale del Lazio e della Toscana<br>Italy                            |
| Formel, Stephen<br>Grad Student ; Microbial Ecology<br>Tulane University<br>United States of America (the)                                | Formey, Damien<br>Research Associate<br>Center for Genomic Sciences<br>Mexico                                                  | Fornaroli, Riccardo<br>Post-Doc - Freshwater ecologist<br>University of Milano-Bicocca<br>Italy                                                             |
| Fornieris, Mattia<br>PhD student / population genetics<br>European Molecular Biology Laboratory<br>Italy                                  | Forrest, Matthew<br>Vegetation and Climate Modelling<br>Germany                                                                | Forrester, Anita<br>Assistant Professor of Geography, Geology, and Environmental Studies<br>Northampton Community College<br>United States of America (the) |
| Forrester, Chiara<br>PhD Student, Ecology and Evolutionary Biology<br>University of Colorado at Boulder<br>United States of America (the) | Forristall, Caryl<br>United States of America (the)                                                                            | Forsberg, Bruce<br>Research scientist<br>Instituto Nacional de Pesquisas da Amazonia<br>Brazil                                                              |

|                                                                                                                  |                                                                                                                                                                         |                                                                                                               |
|------------------------------------------------------------------------------------------------------------------|-------------------------------------------------------------------------------------------------------------------------------------------------------------------------|---------------------------------------------------------------------------------------------------------------|
| Forsthuber, Martin<br>Toxicology<br>Charite<br>Germany                                                           | Fortelius, Mikael<br>Professor of Evolutionary Palaeontology<br>University of Helsinki<br>Finland                                                                       | Fortes Mello, José Henrique<br>PhD student<br>Rio de Janeiro Federal University<br>Brazil                     |
| Fortuna, Rita<br>Biology PhD Student<br>Faculty of Sciences, University of Porto and CIBIO<br>Portugal           | Fortuna Perez, Ana Paula<br>Professor<br>Universidade Estadual Paulista<br>Brazil                                                                                       | Fortunato, Helena *<br>Biology<br>Hokkaido University<br>Japan                                                |
| Forzza, Rafaela<br>Curator of the RB herbarium<br>Rio de Janeiro Botanical Garden<br>Brazil                      | Fossen, Erlend<br>Centre for Biodiversity Dynamics<br>Norway                                                                                                            | Foster, David<br>Director of the Harvard Forest<br>Harvard University<br>United States of America (the)       |
| Foster, Jamie<br>Microbiology<br>University of Florida<br>United States of America (the)                         | Foster, Mercedes S<br>USGS Curator of Birds Emerita/Tropical Ecology<br>National Museum of Natural History/Smithsonian<br>Institution<br>United States of America (the) | Foster, Neal<br>Fishery Biology<br>USGS Great Lakes Science Center, retired<br>United States of America (the) |
| Foster, Rachel *<br>Docent /Marine Microbiology<br>Stockholm University<br>Sweden                                | FOSTER, REBECCA<br>DIRECTOR BELIZE JAGUAR PROGRAM; ECOLOGY &<br>CONSERVATION<br>PANTHERA<br>Belize                                                                      | Foster, Susan<br>Professor of Biology<br>Clark University<br>United States of America (the)                   |
| Foster, Travis<br>PhD Student<br>University of Canterbury<br>New Zealand                                         | Foster, Walter<br>Senior Ecologist<br>U.S. EPA Retired<br>United States of America (the)                                                                                | Foth, Marcus<br>Professor of Urban Informatics<br>Queensland University of Technology<br>Australia            |
| FOUCART, Thomas<br>PhD degree<br>University of Rennes 1, ECOBIO laboratory UMR6553,<br>CEBC laboratory<br>France | Foucaud, julien<br>Research Engineer<br>INRA<br>France                                                                                                                  | Foufopoulos, Johannes<br>Associate Professor<br>University of Michigan<br>United States of America (the)      |
| Foujols, Marie-Alice<br>Climate modeling<br>IPSL<br>France                                                       | Foulkes, Jeff<br>Ecologist<br>Australia                                                                                                                                 | Fountain, Emily<br>Evolutionary biologist<br>United States of America (the)                                   |
| Fourcade, Yoan<br>Post-doctoral researcher<br>SLU - Swedish University of Agricultural Sciences<br>Sweden        | Fourie, Petrus<br>Radiologist<br>Scholtz Partners Radiologists<br>South Africa                                                                                          | Fournier, Denis<br>Research associate FRS-FNRS<br>Université libre de Bruxelles<br>Belgium                    |

|                                                                                                                                         |                                                                                                                                             |                                                                                                                                          |
|-----------------------------------------------------------------------------------------------------------------------------------------|---------------------------------------------------------------------------------------------------------------------------------------------|------------------------------------------------------------------------------------------------------------------------------------------|
| Fournier, Robert<br>Ecologist<br>University of Arkansas<br>United States of America (the)                                               | Fourtune, Lisa<br>PhD candidate in Ecology and Evolution<br>SETE - Moulis<br>France                                                         | Fouts, William<br>Teacher<br>Spring Valley High School<br>United States of America (the)                                                 |
| Fowler, Michael<br>Associate Professor, Biosciences<br>Swansea University<br>United Kingdom of Great Britain and Northern Ireland (the) | Fowles, Edward<br>Botany and Biochemistry<br>University of Natal, Pietermaritzburg, South Africa<br>Portugal                                | Fox, Cecilia<br>Professor of Biological Sciences and Neuroscience<br>Moravian College<br>United States of America (the)                  |
| Fox, Charles<br>Professor<br>University of Kentucky<br>United States of America (the)                                                   | Fox, John Tyler<br>PhD Fish and Wildlife Conservation<br>University of Arkansas<br>United States of America (the)                           | Fox Rosales, Lester Alexander<br>MSc. Student Ecology and Evolutionary Biology<br>Georg August Universitat<br>Germany                    |
| Frale, Ben<br>Fish Collection Manager<br>Scripps Institution of Oceanography<br>United States of America (the)                          | Fracasso, Gerardo<br>PhD student in Biology<br>University of Antwerp<br>Belgium                                                             | Fraga, Dean<br>Professor of Biology<br>College of Wooster<br>United States of America (the)                                              |
| Fraga, Julia<br>Proffesor and researcher<br>Human Ecology Department at CINVESTAV IPN<br>Mexico                                         | Fraga, Rafael<br>Substitute professor / Ecology<br>Universidade Federal do Oeste do Pará<br>Brazil                                          | Fragnière, Augustin<br>Environmental sciences / Philosophy<br>University of Lausanne<br>Switzerland                                      |
| Fragoso, Fabiana<br>Research Associate - Entomology<br>University of Wisconsin<br>United States of America (the)                        | Fragoso, Yara<br>Head of Neurology<br>Universidade Metropolitana de Santos<br>Brazil                                                        | Fragueira, Rita<br>PhD<br>University of Greifswald<br>Germany                                                                            |
| Fraimout, Antoine<br>Post doctoral researcher<br>Centre de Biologie pour la Gestion des Populations - UMR<br>CBGP INRA<br>France        | Fraixedas, Sara<br>Postdoctoral researcher<br>Tour du Valat, Research Institute for the Conservation of<br>Mediterranean Wetlands<br>France | Franc, Alain<br>Senior scientist, evolutionary ecology<br>INRA<br>France                                                                 |
| França, Daniella<br>Researcher-PHD student<br>Museu de Zoologia da Universidade de São Paulo, Brasil.<br>Brazil                         | France, Penny<br>Organic and Sustainable Horticulture<br>Michigan State University<br>United States of America (the)                        | France, Thibaut<br>PhD student in ecology<br>muséum national d'histoire naturelle<br>France                                              |
| Francescoli, Gabriel<br>Adjunct Professor of Ethology<br>Facultad de Ciencias. Universidad de la República<br>Uruguay                   | FRANCESIAZ, Charlotte<br>Researcher<br>ONCFS<br>France                                                                                      | Franchi, Fulvio<br>Lecturer Sedimentology and Stratigraphy<br>Botswana International University of Science and<br>Technology<br>Botswana |

|                                                                                                                               |                                                                                                                                                                                             |                                                                                                     |
|-------------------------------------------------------------------------------------------------------------------------------|---------------------------------------------------------------------------------------------------------------------------------------------------------------------------------------------|-----------------------------------------------------------------------------------------------------|
| Francini-Filho, Ronaldo<br>Associate Professor/Marine Ecology and Conservation<br>Federal University of Paraíba<br>Brazil     | Francis, Bethanie<br>PhD Student, Ocean Sciences<br>School of Ocean Sciences, Bangor University<br>United Kingdom of Great Britain and Northern Ireland<br>(the)                            | Francis, Charlotte<br>PhD student - biology<br>Université catholique de Louvain-la-Neuve<br>Belgium |
| Francis, Clinton<br>Assistant Professor, Ecology<br>California Polytechnic State University<br>United States of America (the) | Francis, Raymond<br>Planetary scientist, Physicist, Engineer<br>Jet Propulsion Laboratory, California Institute of<br>Technology<br>Canada                                                  | Francisco, Jéssica Nayara Carvalho *<br>Master<br>University of São Paulo<br>Brazil                 |
| Francisco, Theresa<br>Occupational Therapist Assistant (Student)<br>Grossmont College<br>United States of America (the)       | Francisco, Vanessa<br>Field officer/ Coral Reef Ecology and Climate Change<br>UNDP<br>Mexico                                                                                                | Franck, Boue *<br>Biologiste<br>Anses<br>France                                                     |
| Franco, Miguel<br>Associate Professor<br>Plymouth University<br>United Kingdom of Great Britain and Northern Ireland<br>(the) | FRANCO, RITA *<br>PROFESSOR EPIDEMIOLOGY<br>FEDERA UNIVERSITY OF BAHIA<br>Brazil                                                                                                            | Franco, Víthor Rosa<br>Psychometrics<br>University of Brasilia<br>Brazil                            |
| Francois, Christophe<br>Research Fellow<br>CNRS<br>France                                                                     | Francois, Juan Luis<br>Professor<br>National Autonomous Univerisity of Mexico<br>Mexico                                                                                                     | Francois, Sarah<br>PhD student<br>INRA<br>France                                                    |
| FRANÇOIS, GUEROLD<br>PROFESSOR /ECOLOGY<br>UNIVERSITY OF LORRAINE<br>France                                                   | Françoise, Gautier<br>PhD<br>Antilles Unversity<br>France                                                                                                                                   | Franco-Lara, Liliana<br>Professor<br>Universidad Militar Nueva Granada<br>Colombia                  |
| Franco-Moraes, Juliano<br>PhD in Ecology<br>Universidade de São Paulo<br>Brazil                                               | Franco-Santos, Rita<br>PhD Candidate<br>Universität Bremen<br>Germany                                                                                                                       | Frank, Alejandro<br>Professor of Physics<br>UNAM<br>Mexico                                          |
| Frank, Anke<br>Senior Researcher at CEPLAS<br>University of Cologne<br>Germany                                                | Frank, Dan<br>Physiotherapy<br>UVM<br>Mexico                                                                                                                                                | Frank, Erik<br>PhD-Student Tropical Biology/Ecology<br>University of Würzburg<br>Germany            |
| Frank, Jens<br>Associate Professor<br>Swedish University of Agricultural Sciences<br>Sweden                                   | Frank, Laurence<br>Carnivore Biology and Conservation<br>Living With Lions, Kenya and Museum of Vertebrate<br>Zoology, University of California, Berkeley<br>United States of America (the) | Frank, Malin<br>Climate Scientist<br>University of Hamburg<br>Germany                               |

|                                                                                                                    |                                                                                                                          |                                                                                                                                                    |
|--------------------------------------------------------------------------------------------------------------------|--------------------------------------------------------------------------------------------------------------------------|----------------------------------------------------------------------------------------------------------------------------------------------------|
| Frank Bolton, Pablo<br>PhD Student Computer Science<br>The George Washington University<br>Mexico                  | Franke, Andrea<br>Post-Doc (Marine Biology)<br>GEOMAR Helmholtz Centre for Ocean Research Kiel<br>Germany                | Franke-Ante, Rebeca<br>Biologist<br>Colombia                                                                                                       |
| Franken, Oscar<br>PhD Candidate, Community ecology<br>Vrije Universiteit, Amsterdam<br>Netherlands (the)           | Frankfurter, Greg<br>Wildlife Veterinarian<br>WHTG<br>United States of America (the)                                     | Frankham, Richard<br>Emeritus Professor in Biology (conservation geneticist)<br>Macquarie University<br>Australia                                  |
| Frankie, Gordon<br>Professor, Biologist<br>Univ. of California, Berkeley<br>United States of America (the)         | Franklin, Craig<br>Professor, Acting Head of School, Biological Sciences<br>The University of Queensland<br>Australia    | Franklin, Donald<br>University Fellow, Ecology<br>Charles Darwin University<br>Australia                                                           |
| Franklin, Elizabeth<br>Researcher<br>Inpa<br>Brazil                                                                | Franklin, Erik<br>Assistant Research Professor, Marine Biology<br>University of Hawaii<br>United States of America (the) | Franklin, Janet<br>Distinguished Professor of Botany and Plant Sciences<br>University of California at Riverside<br>United States of America (the) |
| Franklin, Kim<br>Conservation Research Scientist<br>Arizona-Sonora Desert Museum<br>United States of America (the) | Franklin, Naomi<br>Research Professor of Biology, retired<br>University Of Utah<br>United States of America (the)        | Franklin, Oskar<br>Research Scholar<br>International Institute for Applied Systems Analysis<br>Austria                                             |
| Franks, Kimberley<br>Research<br>University of Western Australia<br>Australia                                      | Franks, Wesley<br>Harte Research Institute for the Gulf of Mexico<br>United States of America (the)                      | Franz, Matthias<br>Ltd. Regierungsdirektor<br>Regierungspraesidium Freiburg<br>Germany                                                             |
| Fraser, Mischa<br>Biotechnology<br>South Africa                                                                    | Fraser, Nicola<br>PhD Candidate<br>Southern Cross University, National Marine Science<br>Centre<br>Australia             | Frate, Ludovico<br>Ecology<br>Italy                                                                                                                |
| Frazao, Fabio<br>Ecologist<br>Frazao<br>Canada                                                                     | Frazão, Annelise<br>PhD Student in Botany<br>University of São Paulo<br>Brazil                                           | Frazier, Camille<br>Ph.D. Candidate in Anthropology<br>University of California, Los Angeles<br>United States of America (the)                     |
| Freak-Poli, Rosanne<br>Epidemiologist, PhD<br>Monash University & Erasmus MC<br>Australia                          | Frechette, Jackson<br>Species Conservation Manager<br>Fauna & Flora International<br>Cambodia                            | Freda Pereira, Fernanda<br>Zootecnista - Educadora Ambiental<br>Centro de Preservação e Pesquisa de Mamíferos<br>Aquáticos da Amazônia<br>Brazil   |



|                                                                                                                      |                                                                                                                                                 |                                                                                                                                                    |
|----------------------------------------------------------------------------------------------------------------------|-------------------------------------------------------------------------------------------------------------------------------------------------|----------------------------------------------------------------------------------------------------------------------------------------------------|
| Fredeen, Art<br>Professor, Ecosystem Science and Management<br>University of Northern British Columbia<br>Canada     | Frederickx, Lander<br>PhD researcher in Earth Sciences<br>SCK-CEN, KU Leuven<br>Belgium                                                         | Frédérique, Santi<br>Genetics<br>INRA<br>France                                                                                                    |
| Fredricson Marquez, Jonatan<br>PhD candidate<br>Norwegian University of Science and Technology<br>Norway             | Fredriksson, Sam<br>Researcher<br>University of Gothenburg<br>Sweden                                                                            | Fredston-Hermann, Alexa<br>PhD Candidate<br>University of California Santa Barbara<br>United States of America (the)                               |
| Free, Aaron<br>Ethology<br>University of Tennessee<br>United States of America (the)                                 | Freeman, Amanda<br>Ecologist<br>The School for Field Studies<br>Australia                                                                       | Freeman, Benjamin<br>Postdoctoral Fellow<br>University of British Columbia<br>Canada                                                               |
| Freeman, Kathy<br>GIS Specialist<br>United States of America (the)                                                   | Freeman, Robin<br>Head of Indicators and Assessments Unit<br>Institute of Zoology<br>United Kingdom of Great Britain and Northern Ireland (the) | Freeman, Scott<br>Biology education; evolutionary biology<br>University of Washington<br>United States of America (the)                            |
| Freese, Katherine<br>professor of physics<br>univ of michigan<br>United States of America (the)                      | Freiberger, Matthias Anton<br>Phd Researcher, Neuromorphic Computing<br>Ghent University<br>Belgium                                             | Freire, Rafael Teixeira<br>Natural Products Research<br>University of São Paulo<br>Brazil                                                          |
| Freitas, Alexia<br>Federal University of Rio de Janeiro (UFRJ)<br>Brazil                                             | Freitas, Andre Victor Lucci<br>Professor<br>Campinas State University<br>Brazil                                                                 | Freitas, Antonio Carlos<br>Associate professor / Environmental scientific photography<br>Universidade do Estado do Rio de Janeiro - UERJ<br>Brazil |
| Freitas, Carolina<br>PhD Candidate (Ecology)<br>Universidade Federal do Rio Grande do Norte<br>Brazil                | Freitas, Helena<br>Full Professor Ecology<br>Centre for Functional Ecology - University of Coimbra<br>Portugal                                  | Freitas, Juliana<br>Professor<br>UNIFESP<br>Brazil                                                                                                 |
| Freitas, Leandro<br>Researcher - Botany<br>Rio de Janeiro Botanical Garden<br>Brazil                                 | Freitas, Madson Antonio Benjamin<br>PhD student Ecology<br>Federal University of Pernambuco<br>Brazil                                           | Freitas, Rafaela *<br>Biology<br>Colegio Marista Arquediocesano<br>Brazil                                                                          |
| Freitas, Rosa<br>Post-doc and Invited Assistant Professor<br>Department of Biology, University of Aveiro<br>Portugal | Freitas, Simone<br>Professor<br>Universidade Federal do ABC<br>Brazil                                                                           | Freitas, Tatiana *<br>MSc Veterinarian Science<br>Oswaldo Cruz Foundation - Rio de Janeiro<br>Brazil                                               |

|                                                                                                                     |                                                                                                                                                                                                         |                                                                                                                       |
|---------------------------------------------------------------------------------------------------------------------|---------------------------------------------------------------------------------------------------------------------------------------------------------------------------------------------------------|-----------------------------------------------------------------------------------------------------------------------|
| Freitas, Tiago<br>Professor<br>Universidade Federal do Pará<br>Brazil                                               | FREITAS DOS SANTOS, CRISTIANE MAGALI<br>NURSING TEACHER IN GRADUATION COURSE AND POST GRADUATION<br>BAHIANA SCHOOL OF MEDICINE AND PUBLIC HEALTH - ESCOLA BAHIANA DE MEDICINA E SAÚDE PÚBLICA<br>Brazil | Freixas Mora, Lúdia<br>Licenciada en biología<br>Museo de Ciencias Naturales de Granollers<br>Spain                   |
| Fréjaville, Thibaut<br>PhD Ecology<br>University of Bordeaux<br>France                                              | Frelat, Romain<br>PhD student<br>University of Hamburg<br>Germany                                                                                                                                       | Fremmerman, Karen<br>Laboratory Scientist<br>Inova Medical Group<br>United States of America (the)                    |
| French, Connor<br>Graduate Student<br>Southern Illinois University at Carbondale<br>United States of America (the)  | Frêne, Cristián<br>Ecosystem Ecology<br>Institute of Ecology and Biodiversity - Chile<br>Chile                                                                                                          | Frenschkowski, Marco<br>Professor of Theology (New Testament Studies)<br>University of Leipzig<br>Germany             |
| Frenzel, Mark<br>Research Scientist in Animal Ecology<br>Helmholtz Centre for Environmental Research UFZ<br>Germany | Frenzel, Peter<br>Lecturer in Palaeontology<br>Institute of Geosciences, University of Jena<br>Germany                                                                                                  | Freschet, Gregoire<br>Researcher, Ecology<br>CNRS<br>France                                                           |
| Freudmann, Anita<br>PhD Student<br>Queensland University of Technology<br>Australia                                 | Freund, Cathryn<br>Wake Forest University<br>United States of America (the)                                                                                                                             | Freund, James<br>Lecturer<br>Lancaster University<br>United Kingdom of Great Britain and Northern Ireland (the)       |
| Freund, Madeleine<br>PhD Physical Oceanography<br>Geomar Kiel<br>Germany                                            | Frey, David<br>PhD Student<br>Swiss Federal Institute for Forest, Snow and Landscape Research WSL<br>Switzerland                                                                                        | Frey, Frank<br>Professor of Biology and Environmental Studies<br>Colgate University<br>United States of America (the) |
| Frey, Julian<br>scientific staff in remote sensing of forests<br>Albert-Ludwigs-Universität Freiburg<br>Germany     | Frey, Mark<br>Biologist<br>United States of America (the)                                                                                                                                               | Frey, Roland<br>Evolutionary Morphologist<br>Leibniz Institute for Zoo and Wildlife Research<br>Germany               |
| Freyhof, Jörg<br>Senior Scientist<br>Leibniz-Institute of Freshwater Ecology and Inland Fisheries<br>Germany        | Freyre-González, Julio Augusto<br>Professor of Systems Biology<br>Universidad Nacional Autónoma de México<br>Mexico                                                                                     | Frias Castro, Gustavo Henrique<br>Professor<br>UFVJM<br>Brazil                                                        |

|                                                                                                                                                                                                  |                                                                                                                                                           |                                                                                                                                                 |
|--------------------------------------------------------------------------------------------------------------------------------------------------------------------------------------------------|-----------------------------------------------------------------------------------------------------------------------------------------------------------|-------------------------------------------------------------------------------------------------------------------------------------------------|
| Frias-Torres, Sarah<br>Research Collaborator in coral reef restoration<br>Smithsonian Marine Station<br>United States of America (the)                                                           | Frick, Hanna<br>PhD Student in Agriculture<br>Switzerland                                                                                                 | Frick, Liezel<br>Associate Professor, Centre for Higher and Adult<br>Education, Faculty of Education<br>Stellenbosch University<br>South Africa |
| Frick, Winifred<br>Senior Director of Conservation Science<br>Bat Conservation International<br>United States of America (the)                                                                   | Fricke, Ronald<br>Ichthyology<br>Germany                                                                                                                  | Frickey, Tancred<br>Senior Bioinformatician<br>SCION forest research<br>New Zealand                                                             |
| Fried, Guillaume<br>Research project manager on arable weeds and invasive<br>plants<br>Anses, Plant Health Laboratory<br>France                                                                  | Fried, Michael N.<br>Associate Professor and Chair of the Program for Science<br>and Technology Education<br>Ben-Gurion University of the Negev<br>Israel | Friedland, René<br>Postdoc<br>Leibniz Institute for Baltic Sea Research Warnemünde<br>Germany                                                   |
| Friedman, Rachel<br>PhD Student, Environmental Decisions<br>University of Queensland<br>Australia                                                                                                | Fried-Petersen, Hannah<br>PhD student in aquatic sciences<br>Swedish University of Agricultural Sciences<br>Sweden                                        | Friedrichs, Martin<br>Ph.D Student<br>Leipzig-Institute for Freshwater Ecology and Inland<br>Fisheries<br>Germany                               |
| Frieiro-Costa, Fernando Antônio<br>Population Ecology<br>Centro Universitário de Lavras<br>Brazil                                                                                                | Friel, John<br>Director<br>Alabama Museum of Natural History<br>United States of America (the)                                                            | Friend, Lucy<br>Environment Manager<br>Corporate<br>Australia                                                                                   |
| Friese, Kurt<br>Associate Professor for Environmental Geochemistry and<br>Hydrochemistry<br>Helmholtz Centre for Environmental Research - UFZ,<br>Department Lake Research, Magdeburg<br>Germany | Friesen, Sarah<br>M.Sc. Candidate in Environmental Studies<br>University of Victoria<br>Canada                                                            | Friesen, Vicki<br>Professor of Biology<br>Queen's University<br>Canada                                                                          |
| Frigerio, Jean-Marc<br>Informatics for Biology<br>INRA<br>France                                                                                                                                 | Frigg, Roman<br>Philosophy of Science<br>LSE<br>United Kingdom of Great Britain and Northern Ireland<br>(the)                                             | Friol, Natália<br>PhD student<br>Universidade de São Paulo<br>Brazil                                                                            |
| Frisch, Ashley<br>Research Coordinator - Marine Sciences<br>Reef HQ - Great Barrier Reef Marine Park Authority<br>Australia                                                                      | Frissell, Christopher<br>Freshwater Ecologist<br>Frissell & Raven Sciences, LLC<br>United States of America (the)                                         | Fritsch, Clémentine<br>Research scientist Ecotoxicology<br>CNRS<br>France                                                                       |

|                                                                                                                                                             |                                                                                                                                     |                                                                                                                                                                    |
|-------------------------------------------------------------------------------------------------------------------------------------------------------------|-------------------------------------------------------------------------------------------------------------------------------------|--------------------------------------------------------------------------------------------------------------------------------------------------------------------|
| Fritz, Uwe<br>Zoology<br>Germany                                                                                                                            | Fritze, Marcus<br>Doctoral Student Biology<br>IZW BERLIN<br>Germany                                                                 | Froese, Graden<br>Ecology<br>Duke University<br>United States of America (the)                                                                                     |
| Froese, Jens<br>Postdoctoral Research Associate<br>Queensland University of Technology<br>Australia                                                         | Froese, Rainer<br>Senior Scientist / Marine Ecology<br>GEOMAR<br>Germany                                                            | Fröhlich, Marlen<br>Postdoctoral researcher, Evolutionary Anthropology<br>University of Zurich<br>Germany                                                          |
| Froidevaux, Jérémy<br>Postgraduate Researcher / Conservation biology<br>University of Bristol<br>United Kingdom of Great Britain and Northern Ireland (the) | Frommen, Joachim<br>Researcher, Behavioural Ecology<br>University of Bern<br>Switzerland                                            | Fronhofer, Emanuel A.<br>Evolutionary Ecologist<br>Eawag and University of Zurich<br>Switzerland                                                                   |
| Frøslev, Tobias<br>Assistant professor<br>University of Copenhagen<br>Denmark                                                                               | Frotté, Lou<br>PhD student / Aquatic ecology<br>Université des Antilles<br>Guadeloupe                                               | Froud, Karyn<br>Epidemiologist<br>Biosecurity Research Ltd<br>New Zealand                                                                                          |
| Fruciano, Carmelo<br>Postdoctoral Fellow - Evolutionary Biology<br>Queensland University of Technology<br>Australia                                         | Fruitema, Marc<br>Netherlands (the)                                                                                                 | Frumkin, Howard<br>Professor, Environmental and Occupational Health Sciences<br>University of Washington School of Public Health<br>United States of America (the) |
| Frumkin, Ron<br>Ecologist<br>Ecological consultant<br>Israel                                                                                                | Fry, Gary<br>Wildlife Management<br>Taronga Zoo<br>Australia                                                                        | Fryar, Sally<br>Adjunct Senior Lecturer - College of Science and Engineering<br>Flinders University<br>Australia                                                   |
| Fuchs, Doris<br>Professor<br>University of Muenster<br>Germany                                                                                              | Fuchs, Jerome<br>Associate Professor/Curator of Bird; Evolutionary Biology<br>Museum National d'Histoire Naturelle, Paris<br>France | Fudickar, Adam<br>Research Scientist<br>Environmental Resilience Institute at Indiana University<br>United States of America (the)                                 |
| Fuentes, Agustin<br>Professor of Anthropology<br>University of Notre Dame<br>United States of America (the)                                                 | Fuentes, Alfredo<br>Research associate/Botany<br>Herbario Nacional de Bolivia<br>Bolivia (Plurinational State of)                   | Fuentes, Nicol<br>Associate researcher/ plant scientist<br>Universidad de Concepcion<br>Chile                                                                      |
| Fuentes-Montemayor, Elisa<br>Research Fellow<br>University of Stirling<br>United Kingdom of Great Britain and Northern Ireland (the)                        | Fuhrmann, Mona<br>Post doc<br>Institute of Zoology, ZSL<br>United Kingdom of Great Britain and Northern Ireland (the)               | Fuiman, Lee<br>Professor of Marine Science<br>University of Texas at Austin<br>United States of America (the)                                                      |

|                                                                                                                   |                                                                                                                                        |                                                                                                                                           |
|-------------------------------------------------------------------------------------------------------------------|----------------------------------------------------------------------------------------------------------------------------------------|-------------------------------------------------------------------------------------------------------------------------------------------|
| Fujita, Estefani<br>Veterinary Doctor<br>Amazon National Research Institute<br>Brazil                             | Fujita, Yoshiko<br>United States of America (the)                                                                                      | Fukuda, Marcelo V.<br>Professor - Invertebrates Zoology/Marine Biology<br>Federal University of Juiz de Fora<br>Brazil                    |
| Fulgione, Andrea<br>Ph.D. student<br>University of Vienna<br>Austria                                              | FULGIONE, WALTER<br>SENIOR RESEARCHER IN ASTRO-PARTICLE PHYSICS<br>Istituto Nazionale di Astrofisica - Osservatorio di Torino<br>Italy | Fuller, Andrea<br>Professor, Physiology<br>University of the Witwatersrand<br>South Africa                                                |
| Fuller, Matthew<br>PhD Student in Critical Geography<br>University of Victoria<br>Canada                          | Fuller, Randall<br>Professor of Biology and Environmental Studies<br>Colgate University<br>United States of America (the)              | Fuller, Richard<br>Associate Professor, Conservation Biology<br>University of Queensland<br>Australia                                     |
| Fulop, Martin<br>Carpenter<br>United States of America (the)                                                      | Fulton, Beth<br>Group Leader Ecosystem Modelling and Risk Assessment<br>CSIRO<br>Australia                                             | Fulton, Graham<br>Associate Lecturer and Editor Conservation Biology<br>Murdoch University and The University of Queensland.<br>Australia |
| Fulton, Mark<br>Professor of Biology<br>Bemidji State University<br>United States of America (the)                | Fumanal, Boris<br>Associate Professor in Ecology<br>Université Clermont Auvergne, INRA, UMR 547 PIAF<br>France                         | Fumey, Julien<br>Postdoctoral researcher in population genomics<br>Université Paris Sud, CNRS<br>France                                   |
| Funes, Manuela<br>PhD student<br>CESIMAR-CONICET<br>Argentina                                                     | FUNG, Obed *<br>Consultant in Environmental and Forestry Economics<br>CIFOR<br>Cameroon                                                | Fung-Loy, Kimberley<br>Suriname                                                                                                           |
| Funk, Jason<br>Associate Director<br>Center for Carbon Removal<br>United States of America (the)                  | Funk, W. Chris<br>Associate Professor<br>Colorado State University<br>United States of America (the)                                   | Funston, Paul<br>Senior Director Lion Program<br>Panthera<br>Namibia                                                                      |
| Furlan, Valentin<br>Biologist<br>Canada                                                                           | Furlan Lopes, Cassiane<br>Graduating in Biological Sciences<br>Federal University of Pampa<br>Brazil                                   | Fürtig, Marc-Alexander<br>Pharmacist<br>Germany                                                                                           |
| Fuß, Thomas<br>PhD Student, Ecology<br>Leibniz-Institute of Freshwater Ecology and Inland<br>Fisheries<br>Germany | Fust, Pascal<br>Biodiversity researcher<br>Dahari, Comoros<br>Comoros (the)                                                            | Fyles, James<br>Tomlinson Chair in Forest Ecology<br>McGill University<br>Canada                                                          |

|                                                                                                                                                       |                                                                                                                               |                                                                                                                        |
|-------------------------------------------------------------------------------------------------------------------------------------------------------|-------------------------------------------------------------------------------------------------------------------------------|------------------------------------------------------------------------------------------------------------------------|
| G, SATHISHKUMAR<br>RESEARCH SCHOLAR<br>PERIYAR UNIVERSITY<br>India                                                                                    | G B Souza-Dias, Pedro<br>Post doc<br>Instituto de Biociências, Universidade de São Paulo<br>Brazil                            | G J, Lingaraj<br>Researcher<br>McGill University<br>India                                                              |
| G. Bifi, Alessandro<br>Systematic and ecology of freshwater fishes<br>INPA-Instituto Nacional de Pesquisas da Amazônia<br>Brazil                      | G. Frederico, Renata<br>Postdoc<br>Universidade Federal do Pará<br>Brazil                                                     | G. Illan, Javier<br>Research Associate<br>Washington State University<br>United States of America (the)                |
| Gaard, Greta<br>Professor, Sustainable Justice & Environmental<br>HUmanities<br>University of Wisconsin-River Falls<br>United States of America (the) | Gaban-Lima, Renato *<br>Professor<br>Federal University of Alagoas<br>Brazil                                                  | Gabay, Dayanara Sharmaine<br>Philippines (the)                                                                         |
| Gabel, Sarah<br>PhD Student<br>Trinity College Dublin<br>Ireland                                                                                      | Gabor, Caitlin<br>Professor of biology<br>TEexas State University<br>United States of America (the)                           | Gabriel, Cuevas<br>Investigador Titular. Organic Chemistry<br>Universidad Nacional Autónoma de México<br>Mexico        |
| Gabriel, Marissa<br>Drexel University<br>United States of America (the)                                                                               | Gaburro, Julie<br>PhD student<br>Deakin University<br>Australia                                                               | Gachet, Sophie<br>Assistant Professor<br>Aix Marseille University<br>France                                            |
| Gaeta, Juliana<br>Phd student<br>Universidade Fedearl do Ceará<br>Brazil                                                                              | Gaffikin, Lynne<br>Consulting Associate Professor School of Medicine<br>Stanford University<br>United States of America (the) | Gafny, Sarig<br>Associate Professor<br>School of Marine Sciences, Ruppin Academic Center<br>Israel                     |
| Gagen, Sonja<br>Environmental Engineering Student<br>Clarkson University<br>United States of America (the)                                            | Gager, Leslie<br>phD student<br>IUEM<br>France                                                                                | Gager, Yann<br>Biology<br>Germany                                                                                      |
| Gaget, Elie<br>PhD student<br>MNHN - Tour du Valat<br>France                                                                                          | Gaget, Virginie<br>Post-doctoral fellow/Ecology and Environmental Sciences<br>University of Adelaide<br>Australia             | Gaglianone, Maria Cristina<br>Professor / Ecology<br>Universidade Estadual do Norte Fluminense Darcy Ribeiro<br>Brazil |
| Gaglioti, André Luiz<br>Professor / Botany<br>Instituto de Botânica, São Paulo<br>Brazil                                                              | Gagne, Lynda<br>Public Administration / Economics<br>University of Victoria<br>Canada                                         | Gagnon, Marianne<br>Biology<br>University Laval<br>Canada                                                              |

|                                                                                                                           |                                                                                                                                                                               |                                                                                                                        |
|---------------------------------------------------------------------------------------------------------------------------|-------------------------------------------------------------------------------------------------------------------------------------------------------------------------------|------------------------------------------------------------------------------------------------------------------------|
| Gaillard, Camille<br>Doctoral researcher - Ecological modelling<br>Senckenberg Gesellschaft für Naturforschung<br>Germany | Gaimari, Stephen<br>Environmental Program Manager I / Entomologist<br>California Department of Food and Agriculture<br>United States of America (the)                         | Gaiotto, Fernanda Amato<br>Professor / Population Genetics<br>Universidade Estadual de Santa Cruz<br>Brazil            |
| Gaiotto Miyoshi, Alexander<br>Adjunct professor<br>Universidade Federal de Uberlândia<br>Brazil                           | Gajardo, Gonzalo<br>Professor<br>Universidad de los Lagos at Osorno<br>Chile                                                                                                  | Galan, Maxime<br>Molecular Ecologist<br>INRA<br>France                                                                 |
| Galante Neto, Giuseppe<br>Civil Engineering<br>n/a<br>Brazil                                                              | Galatti, Ulisses<br>Researcher (Biologist)<br>Museu Goeldi<br>Brazil                                                                                                          | Galbán-Malagón, Cristóbal<br>Assistant Professor<br>Universidad Andres Bello<br>Chile                                  |
| Galbany, Jordi<br>Postdoctoral scientist<br>The George Washington University<br>United States of America (the)            | Galbraith, Josie<br>Ecologist<br>University of Auckland<br>New Zealand                                                                                                        | Galbraith, Mel<br>Senior Lecturer, Ecology<br>Unitec Institute of Technology<br>New Zealand                            |
| Gale, George<br>Thailand                                                                                                  | Galeano, Sandra P.<br>Adjunct Professor<br>Universidad de Antioquia<br>Colombia                                                                                               | Galen, Candace<br>Professor<br>University of Missouri<br>United States of America (the)                                |
| Galesic, Mirta<br>social science<br>Santa Fe Institute<br>United States of America (the)                                  | Galhano, Cristina<br>Assistant Professor Department of Environment/PhD<br>Biology-Ecology<br>Coimbra College of Agriculture – Polytechnic Institute of<br>Coimbra<br>Portugal | Galhardo, Mafalda<br>post-doc<br>CIBIO, University of Porto<br>Portugal                                                |
| Galiano, Mauricio<br>Researcher<br>National University of Cordoba<br>Argentina                                            | Galicia-Herbada, David<br>Biodiversity specialist and Associate Professor. Biology<br>Tragsatec and Universidad Autónoma de Madrid<br>Spain                                   | Galindo, Flavia<br>Professora de Consumo e Marketing<br>UFRRJ - Universidade Federal Rural do Rio de Janeiro<br>Brazil |
| Galizia, C Giovanni<br>Professor<br>University of Konstanz<br>Germany                                                     | Gall, Olivia<br>Full Professor History<br>National Autonomous University of Mexico<br>Mexico                                                                                  | Gallagher, Bryna<br>Environmental Humanities<br>University of Utah<br>United States of America (the)                   |
| Gallagher, steven<br>Assistant Vice Chancellor<br>Scripps Institution of Oceanography<br>United States of America (the)   | Gallardo Cruz, Karen<br>Master's Student in Tropical Conservation Biology and<br>Environmental Science<br>University of Hawaii, Hilo<br>United States of America (the)        | Gallardo-Gomez, Maria<br>PhD student<br>University of Vigo<br>Spain                                                    |

|                                                                                                                                                           |                                                                                                                                      |                                                                                                                                                                                                                                                                                                            |
|-----------------------------------------------------------------------------------------------------------------------------------------------------------|--------------------------------------------------------------------------------------------------------------------------------------|------------------------------------------------------------------------------------------------------------------------------------------------------------------------------------------------------------------------------------------------------------------------------------------------------------|
| Gallego Urrea, Julian<br>Researcher<br>Department of marine sciences, University of Gothenburg<br>Sweden                                                  | Gallego-García, Carlos<br>PhD student in Molecular Virology<br>Centro de Biología Molecular Severo Ochoa (CBMSO)<br>Spain            | Gallegos-Sánchez, Silvana<br>PhD student<br>Instituto de Biodiversidad Neotropical-Conicet<br>Argentina<br>Ecuador                                                                                                                                                                                         |
| Galli, Alessandro<br>Senior Scientist and Director Mediterranean Program<br>Global Footprint Network<br>Italy                                             | Gallien, Laure<br>Researcher<br>Centre of excellence for Invasion Biology, University of Stellenbosch<br>South Africa                | Gallmetzer, Nina<br>Austria                                                                                                                                                                                                                                                                                |
| Gallo, Natalya<br>PhD Candidate in Oceanography<br>Scripps Institution of Oceanography, UCSD<br>United States of America (the)                            | Gallon, Susan<br>Marine ecology<br>Agence Française pour la Biodiversité<br>France                                                   | Galloni, Marta<br>Associate Professor of Botany, Dept. BiGeA<br>Alma Mater Studiorum - Università di Bologna<br>Italy                                                                                                                                                                                      |
| Gallopin, Méline<br>Associate Professor<br>Université Paris Sud<br>France                                                                                 | Galloway, Aaron<br>Assistant Professor<br>Oregon Institute of Marine Biology; University of Oregon<br>United States of America (the) | Galloway, James Alexander McLaren<br>Masters by Science Student (Evolutionary and Behavioural Ecology) and as of Sept 2017 PhD Student (Sensory Ecology: Animal Vision, Colour Change and Camouflage)<br>University of Exeter, Penryn Campus<br>United Kingdom of Great Britain and Northern Ireland (the) |
| GALVAN, SILVIA<br>DOCTORADE STUDENT<br>UNESP<br>Brazil                                                                                                    | Galvão, Rafael<br>Doctor<br>UNICAMP<br>Brazil                                                                                        | Gálvez, José Ángel<br>Professor of Ecology<br>University of Cádiz<br>Spain                                                                                                                                                                                                                                 |
| Galvez-Bravo, Lucia<br>Lecturer in Conservation Ecology<br>Liverpool John Moores University<br>United Kingdom of Great Britain and Northern Ireland (the) | Galvin, Stephen<br>Lecturer in Biogeography<br>University of the South Pacific<br>Fiji                                               | Gama, Modesto Jose Luis da<br>Mechanical Engineer, civil engineer<br>University Veiga de Almeida<br>Brazil                                                                                                                                                                                                 |
| Gamba, Marco<br>Researcher in Zoology<br>University of Torino<br>Italy                                                                                    | Gambetta, Maria Cristina<br>Assistant Professor<br>University of Lausanne<br>Switzerland                                             | Gamboa, Ruth<br>Associate Professor/Biology<br>University of the Philippines Mindanao<br>Philippines (the)                                                                                                                                                                                                 |
| Gamez, Alejandra<br>Associated Professor / Molecular Biology<br>Universidad Autonoma de Madrid<br>Spain                                                   | Gamfeldt, Lars<br>Associate professor<br>University of Gothenburg<br>Sweden                                                          | Gammon, Richard<br>Professor Emeritus, Chemistry and Oceanography<br>University of Washington<br>United States of America (the)                                                                                                                                                                            |



|                                                                                                                                              |                                                                                                           |                                                                                                          |
|----------------------------------------------------------------------------------------------------------------------------------------------|-----------------------------------------------------------------------------------------------------------|----------------------------------------------------------------------------------------------------------|
| Ganade, Gislene<br>Associate Professor / Restoration Ecology<br>Universidade Federal do Rio Grande do Norte<br>Brazil                        | Gañan, Melisa<br>Biologist<br>Magallanes university<br>Chile                                              | Gancedo, Carlos<br>Research Professor<br>Instituto de Investigaciones Biomédicas "Alberto Sols"<br>Spain |
| Gandhi, Shrey<br>PhD student<br>Institute of Human Genetics, University of Muenster<br>Germany                                               | Gandin, Anthony<br>Assistant Professor<br>Université de Lorraine<br>France                                | Gangloff, Benoit<br>Molecular Ecology<br>Museum National D'Histoire Naturelle, Paris<br>France           |
| Gangloff, Eric J.<br>Marie Skłodowska-Curie Post-Doctoral Research Fellow<br>Station d'Ecologie Théorique et Expérimentale du CNRS<br>France | Gangloff, Giani<br>Plant Ecology<br>University of Tübingen<br>Germany                                     | Ganser, Dominik<br>PhD Student<br>Institute of Ecology and Evolution<br>Switzerland                      |
| Gant, Joshua<br>MD, MPH<br>United States of America (the)                                                                                    | Gantar, Miroslav<br>Senior Lecturer<br>Florida International University<br>United States of America (the) | Ganzarolli de Oliveira, Marcelo<br>Professor of Chemistry<br>University of Campinas - UNICAMP<br>Brazil  |
| Ganzert, Lars<br>Postdoc, Environmental Microbiology<br>Leibniz Institute for Freshwater Ecology and Inland<br>Fisheries<br>Germany          | Gao, Guoping *<br>Professor/Physical Oceanography<br>Shanghai Ocean University<br>China                   | Gao, Jiajia<br>PhD<br>University of Amsterdam<br>Netherlands (the)                                       |
| Garabedian, James<br>United States of America (the)                                                                                          | Garay-Arroyo, Adriana<br>Researcher<br>UNAM<br>Mexico                                                     | Garay-Narvaez, Leslie<br>Chile                                                                           |
| Garbino, Guilherme<br>PhD Candidate<br>Universidade Federal de Minas Gerais<br>Brazil                                                        | Garção, José<br>Assistant professor<br>Universidade de Évora<br>Portugal                                  | Garcés-Pastor, Sandra<br>PhD student<br>Universitat de Barcelona<br>Spain                                |
| Garcia, Celsa<br>Plant pathology<br>Universidad Nacional de Colombia<br>Colombia                                                             | GARCIA, EDENISE<br>Deputy Science Coordinator<br>The Nature Conservancy<br>Brazil                         | Garcia, Eduardo Garcia<br>Researcher<br>Fundacentro<br>Brazil                                            |
| Garcia, Erica<br>Aquatic Ecology<br>Charles Darwin University<br>Australia                                                                   | Garcia, Hernando<br>Deputy Director<br>Alexander von Humboldt Institute<br>Colombia                       | Garcia, Junior<br>Lecturer (Ecological Economist)<br>Federal University of Paraná<br>Brazil              |

|                                                                                                       |                                                                                                                                                                    |                                                                                                                                      |
|-------------------------------------------------------------------------------------------------------|--------------------------------------------------------------------------------------------------------------------------------------------------------------------|--------------------------------------------------------------------------------------------------------------------------------------|
| Garcia, Luis<br>Docente Grado 2<br>Universidad de la República-CURE<br>Uruguay                        | Garcia, Matthew<br>Ph.D. Candidate, Forest Science<br>University of Wisconsin – Madison<br>United States of America (the)                                          | Garcia, Maxime *<br>Bioinformtiker<br>Sweden                                                                                         |
| Garcia, Priscila<br>Brazil                                                                            | Garcia, Sarahi L.<br>Microbial Ecology<br>Uppsala University<br>Sweden                                                                                             | García, Adriana Karina<br>Dra. Cs Biologicas, Cs de la Tierra –Hidrología e<br>Hidrogeografía<br>Fundación Miguel Lillo<br>Argentina |
| García, Ana<br>PhD student<br>Rey Juan Carlos University<br>Spain                                     | García, Daniel<br>PhD student<br>Universidad de la República<br>Uruguay                                                                                            | García, Nuria<br>teacher, paleontology<br>Universidad Complutense de Madrid<br>Spain                                                 |
| Garcia - Orellana, Jordi<br>Associate professor<br>Universitat Autònoma de Barcelona<br>Spain         | García Ayala, Gabriel<br>Marine Biology<br>Universidad Veracruzana<br>Mexico                                                                                       | Garcia Bravo, Andrea<br>Post-doc<br>IDAEA-CSIC<br>Spain                                                                              |
| Garcia Cabrera, Karina<br>MSc. and PhD student<br>Wake Forest University<br>Peru                      | GARCIA CARRERA, VERONICA<br>graduate students in marine Sciences<br>Instituto de Ciencias del Mar y Limnología Universidad<br>Nacional Autónoma de Méxic<br>Mexico | Garcia Fernandez, Lisbeth *<br>Biologist<br>IDEA<br>Venezuela (Bolivarian Republic of)                                               |
| Garcia Luize, Bruno<br>Ecologist<br>UNESP<br>Brazil                                                   | García Manzanares, Ana *<br>Environmental biology<br>Spain                                                                                                         | GARCIA NOVO, Francisco<br>Ecology<br>Royal Spanish Academy of Science<br>Spain                                                       |
| Garcia Salom, Miguel<br>Professor of Physiology, Faculty of Medicine<br>University of Murcia<br>Spain | Garcia Walther, Julian<br>Biologist<br>Independent<br>Mexico                                                                                                       | Garcia-Bañuelos, Monica<br>Research Proffesor<br>CIAD (Centro de Investigación en Alimentación y<br>Desarrollo, A.C.)<br>Mexico      |
| García-Barros Saura, Enrique<br>Professor<br>Dept. Biology, Universidad Autónoma de Madrid<br>Spain   | Garcia-Bellido, Dr Diego C.<br>Australian Research Council Future Fellow<br>University of Adelaide<br>Australia                                                    | Garcia-Bellido, Juan<br>Professor of Physics<br>Universidad Autonoma Madrid<br>Spain                                                 |
| Garcia-Bellido Capdevila, Antonio<br>Ethology (Zoology-Biology)<br>Spain                              | Garcia-Berthou, Emili<br>Professor of Ecology<br>University of Girona<br>Spain                                                                                     | García-Bravo, Miguel<br>Mathematics<br>Universidad Autónoma de Madrid<br>Spain                                                       |

|                                                                                                                     |                                                                                                                                                                             |                                                                                                                                                              |
|---------------------------------------------------------------------------------------------------------------------|-----------------------------------------------------------------------------------------------------------------------------------------------------------------------------|--------------------------------------------------------------------------------------------------------------------------------------------------------------|
| García-Callejas, David<br>Ph.D student in Ecology<br>CREAF, Universitat Autònoma de Barcelona<br>Spain              | García-Camacho, Raúl<br>R&D Project Manager/Plant Ecology<br>Universidad Rey Juan Carlos<br>Spain                                                                           | Garcia-Cisneros, Alex<br>Post-Doc<br>CEAB-CSIC<br>Spain                                                                                                      |
| Garcia-Estrada, Carlos<br>Researcher (Biotechnology)<br>INBIOTEC, Instituto de Biotecnología de León<br>Spain       | García-Girón, Jorge<br>Ecology<br>University of León<br>Spain                                                                                                               | Garcia-Gonzalez, Francisco<br>Research Scientist (Evolutionary Biology)<br>Doñana Biological Station-CSIC<br>Spain                                           |
| García-González, Ricardo<br>Researcher/Mammal ecology<br>Spanish National Research Council<br>Spain                 | Garcia-Hernandez, Jaqueline<br>Researcher<br>CIAD<br>Mexico                                                                                                                 | García-Huidobro M., M. Roberto<br>Postdoctoral researcher<br>Centro de Investigación e Innovación para el Cambio Climático, Universidad Santo Tomás<br>Chile |
| Garcia-Iglesias, Miguel<br>Postdoctoral researcher in Organic Chemistry<br>Universidad Autonoma de Madrid<br>Spain  | GARCIA-MOZO, HERMINIA<br>PROFESSOR OF DEPARTMENT OF BOTANY<br>UNIVERSITY OF CORDOBA<br>Spain                                                                                | GARCIA-MURILLO, PABLO<br>PROFESOR TITULAR DE UNIVERSIDAD/BOTANY<br>UNIVERSIDAD DE SEVILLA<br>Spain                                                           |
| García-Pagán, Alejandro<br>Teacher/Physical science<br>Spain                                                        | García-Palacios, Pablo<br>Postdoctoral Researcher - Terrestrial Ecology<br>Rey Juan Carlos University<br>Spain                                                              | Garcia-Pausas, Jordi<br>Postdoc fellow, Ecology<br>Forest Sciences Centre of Catalonia (CTFC)<br>Spain                                                       |
| García-Rodríguez, Alberto<br>PhD Student<br>Institute of Nature Conservation - Polish Academy of Sciences<br>Poland | Garcirrubio Granados, Alejandro<br>Bioinformatics<br>National University of Mexico, UNAM<br>Mexico                                                                          | García-Salgado, Gonzalo<br>PhD Ecologist<br>Dpt. Life Sciences - University of Alcalá<br>Spain                                                               |
| GarciaSolis, Fernando<br>PhD Candidate<br>Los Lagos University<br>Chile                                             | García-Valdés, Raúl<br>Postdoctoral fellow, ecology<br>Centre of Ecological Research and Forestry Applications (CREAF) and Universitat Autònoma de Barcelona (UAB)<br>Spain | Garcia-Valencia, Liliana<br>PhD student, Plant Biology<br>Universidad Nacional Autónoma de México<br>Mexico                                                  |
| Garcia-Valls, Ricard<br>Associate Professor in Chem. Engineering<br>URV<br>Spain                                    | Garcimartin, Cristian<br>Lawyer<br>Spain                                                                                                                                    | Garda, Adrian<br>Full professor, Ecology and Evolution of amphibians and reptiles<br>Federal University of Rio Grande do Norte<br>Brazil                     |

|                                                                                                                                                          |                                                                                                                          |                                                                                                                                                                                                       |
|----------------------------------------------------------------------------------------------------------------------------------------------------------|--------------------------------------------------------------------------------------------------------------------------|-------------------------------------------------------------------------------------------------------------------------------------------------------------------------------------------------------|
| Gardea, Alfonso A.<br>Research Professor<br>Centro de Investigación en Alimentación y Desarrollo, A.C.<br>Mexico                                         | Gärdenfors, Ulf<br>Professor of Conservation Biology<br>Swedish Species Information Centre, SLU<br>Sweden                | Gardner, Charlie J.<br>Lecturer in Biodiversity Conservation<br>Durrell Institute of Conservation and Ecology, University<br>of Kent<br>United Kingdom of Great Britain and Northern Ireland<br>(the) |
| Gardner, Robert<br>Emeritus Professor of Psychology<br>University of Nevada, Reno<br>United States of America (the)                                      | Gardner, Robert<br>Emeritus Professor of Psychology<br>University of Nevada, Reno<br>Saint Barthélemy                    | Gardner, Robert<br>Emeritus Professor of Psychology<br>University of Nevada, Reno<br>United States of America (the)                                                                                   |
| Gardner, Scott<br>Curator of Parasitology<br>H.W. Manter Laboratory of Parasitology, University of<br>Nebraska-Lincoln<br>United States of America (the) | Garilleti, Ricardo<br>Profesor Titular<br>University of Valencia<br>Spain                                                | Garman, Gayle<br>Aquatic Ecology<br>United States of America (the)                                                                                                                                    |
| Garmendia, Eneko<br>Ecological Economics<br>University of the Basque Country (UPV/EHU)<br>Spain                                                          | Garnett, Stephen<br>Professor of Conservation and Sustainable Livelihoods<br>Charles Darwin University<br>Australia      | Garnier, Aurélie<br>PhD student in Ecology<br>France                                                                                                                                                  |
| Garnier, Eric<br>Director of Research<br>CNRS<br>France                                                                                                  | Garnier, Julie<br>Founder<br>Odyssey Conservation Trust<br>United Kingdom of Great Britain and Northern Ireland<br>(the) | GARNIER-GERE, Pauline<br>Research scientist, Evolutionary Biologist, Forestry<br>INRA (National Institute of Agronomical Research)<br>France                                                          |
| Garnock-Jones, Phil<br>Emeritus Professor/Botany<br>Victoria University of Wellington<br>New Zealand                                                     | Garrabou, Joaquim<br>Senior Researcher - Marine Conservation Biologist<br>Spanish Research Council<br>Spain              | Garrett, Eva<br>Assistant Professor of Anthropology<br>United States of America (the)                                                                                                                 |
| Garrett, John<br>Oceanography<br>Canada                                                                                                                  | Garrett, Kimball<br>Ornithologist<br>Natural History Museum of Los Angeles County<br>United States of America (the)      | Garrett, Lucy<br>PhD candidate, animal science<br>University of Birmingham<br>United Kingdom of Great Britain and Northern Ireland<br>(the)                                                           |
| Garrett-Engle, Philip<br>Senior Scientist<br>Merck & Co., Inc.<br>United States of America (the)                                                         | Garrido, Pablo<br>PhD candidate<br>Swedish University of Agricultural Sciences<br>Sweden                                 | Garriga, Joan<br>Data Scientist<br>CEAB-CSIC<br>Spain                                                                                                                                                 |

|                                                                                                                                        |                                                                                                                                                                 |                                                                                                                                                 |
|----------------------------------------------------------------------------------------------------------------------------------------|-----------------------------------------------------------------------------------------------------------------------------------------------------------------|-------------------------------------------------------------------------------------------------------------------------------------------------|
| Garriga, Núria<br>Biologist<br>Universitat de Barcelona<br>Spain                                                                       | Gartner, Coral<br>Principal Research Fellow<br>The University of Queensland<br>Australia                                                                        | Garvin, Stephanie<br>Permaculture consultant<br>Dreamscape permaculture<br>United Kingdom of Great Britain and Northern Ireland (the)           |
| Garza-Perez, J. Rodrigo<br>Coral Reef Assessment<br>UNAM<br>Mexico                                                                     | Gasbarro, Ryan<br>Graduate Student – Biological Oceanography<br>University of Victoria<br>Canada                                                                | Gascón, Stéphanie<br>Associate Professor<br>Institute of Aquatic Ecology & Dept of Environmental Sciences, University of Girona<br>Spain        |
| Gaspar, Augusta<br>Professor of Psychology<br>Universidade Católica Portuguesa and ISCTE-Instituto Universitario de Liaboa<br>Portugal | Gasparini, Stéphane<br>Associate professor<br>Pierre et Marie Curie University<br>France                                                                        | GASPAR-RAMIREZ, OCTAVIO<br>PhD, TOXICOLOGY<br>CIATEJ<br>Mexico                                                                                  |
| Gass, Lee<br>Professor Emeritus, Zoology<br>University of British Columbia<br>Canada                                                   | Gasso, Viktor<br>Associate Professor, Vice Dean / Zoology and Ecology<br>Oles Honchar Dnipro National University<br>Ukraine                                     | Gaston, Kevin<br>Professor of Biodiversity & Conservation<br>University of Exeter<br>United Kingdom of Great Britain and Northern Ireland (the) |
| Gaston, Nicola<br>Associate Professor of Physics<br>The University of Auckland<br>New Zealand                                          | Gasulla, Francisco<br>Posdoctoral Researcher<br>Universidad de Alcalá<br>Spain                                                                                  | Gateau, Lauranne<br>PhD student, Plant Sciences<br>University of Cambridge<br>United Kingdom of Great Britain and Northern Ireland (the)        |
| Gates, Dr<br>Gates<br>Australia                                                                                                        | Gates, J. Edward<br>Professor of Wildlife and Conservation Ecology<br>University of Maryland Center for Environmental Science<br>United States of America (the) | Gates, Jody<br>Principal Policy Officer - Nature Conservation<br>Dept. of Environment, Water and Natural Resources, Sth Aust.<br>Australia      |
| Gato, Anabela<br>Portugal                                                                                                              | Gatti, Jean-Luc<br>Directeur de Recherche<br>INRA<br>France                                                                                                     | Gatti, Luciana V.<br>Scientific Research<br>INPE<br>Brazil                                                                                      |
| Gatto, Cassiano AFR<br>Ph.D. candidate / Ornithology<br>Instituto Nacional de Pesquisas da Amazônia - INPA<br>Brazil                   | Gattuso, Jean-Pierre<br>Senior Research Scientist<br>CNRS, Université Pierre et Marie Curie and IDDRI<br>France                                                 | Gaube, Paul<br>PhD Student<br>University of Würzburg<br>Germany                                                                                 |

|                                                                                                             |                                                                                                                                                 |                                                                                                                                         |
|-------------------------------------------------------------------------------------------------------------|-------------------------------------------------------------------------------------------------------------------------------------------------|-----------------------------------------------------------------------------------------------------------------------------------------|
| GauchereI, Cédric<br>researcher in ecology<br>INRA<br>France                                                | Gauci, Vincent<br>Professor of Global Change Ecology<br>The Open University<br>United Kingdom of Great Britain and Northern Ireland<br>(the)    | Gaudard, Adrien<br>Eawag<br>Switzerland                                                                                                 |
| Gaudard, Clara<br>Zoology Honours student<br>University of Pretoria<br>South Africa                         | GAUDIN, Jean-Charles<br>Researcher / Molecular Biology<br>INRA<br>France                                                                        | Gauld, David<br>Professor, Mathematics<br>University of Auckland<br>New Zealand                                                         |
| Gauthier, Mailys<br>PhD Student<br>Irstea<br>France                                                         | Gauthier-Clerc, Michel<br>Director, DVM, PhD<br>Fondation du Parc Zoologique de la Garenne<br>Switzerland                                       | Gautier, Laurent<br>Head Curator - phanerogams<br>Conservatoire et Jardin botaniques de la Ville de Genève<br>Switzerland               |
| Gauto, Irene<br>Conservation Biology<br>Asociación Etnobotánica Paraguaya<br>Paraguay                       | Gaveau, David<br>Landscape Ecologist<br>Center for International Forestry Research<br>Indonesia                                                 | Gavin, Anne-Claude<br>Group leader, natural science, biology<br>European Molecular Biology Laboratory<br>Germany                        |
| Gavín Centol, María Pilar<br>Biologist, technician<br>Estación Experimental de Zonas Áridas - CSIC<br>Spain | Gawel, Mike<br>Resource Manager<br>NPS<br>Guam                                                                                                  | Gaynor, Andrea<br>Associate Professor of Environmental History<br>The University of Western Australia<br>Australia                      |
| Gayo, Eugenia<br>Historical Ecology<br>Center for Climate and Resilience Research<br>Chile                  | Gaytan, Susana<br>Full professor<br>University of Seville<br>Spain                                                                              | Gaytan-Caballero, Adriana<br>Master in Science and Teacher A<br>Facultad de Ciencias, Universidad Nacional Autónoma de México<br>Mexico |
| Gazave, Eve<br>Researcher<br>CNRS<br>France                                                                 | Gazzola, Andrea<br>PhD. Environmental biology, Biologist<br>ACDB, Association for the Conservation of Biological<br>Diversity<br>Romania        | Gea Bermúdez, Juan<br>Research Assistant<br>DTU<br>Denmark                                                                              |
| Geary, Dana<br>Professor Emerita<br>University of Wisconsin - Madison<br>United States of America (the)     | Geary, Matt<br>Senior Lecture in Conservation Biology<br>University of Chester<br>United Kingdom of Great Britain and Northern Ireland<br>(the) | Geary, William<br>Ecologist<br>Department of Environment, Land, Water & Planning<br>Australia                                           |
| Geballe, Gordon<br>Lecturer<br>School Forestry & Env Studies, Yale Univ<br>United States of America (the)   | Gebara, Maria Fernanda<br>Brazil                                                                                                                | Gebeyehu, Amare<br>Consultant/Horticulture<br>Reliable Horti-Consult<br>Ethiopia                                                        |

|                                                                                                                                                                        |                                                                                                                                          |                                                                                                                                                           |
|------------------------------------------------------------------------------------------------------------------------------------------------------------------------|------------------------------------------------------------------------------------------------------------------------------------------|-----------------------------------------------------------------------------------------------------------------------------------------------------------|
| Gehin, Charlotte<br>Postdoctoral fellow in Biochemistry<br>EMBL Heidelberg<br>Germany                                                                                  | Gehman, Alyssa-Lois<br>Postdoctoral fellow<br>University of British Columbia<br>Canada                                                   | Gehr, Benedikt<br>postdoctoral researcher/ ecologist<br>University of Zurich<br>Switzerland                                                               |
| Geiger, Daniel L.<br>Curator of Malacology<br>Santa Barbara Museum of Natural History<br>United States of America (the)                                                | Geiger, Katja, Juliana<br>Msc Marine biologist<br>Germany                                                                                | Geiger, Matthias Felix<br>PostDoc biologist<br>Zoologisches Forschungsmuseum Alexander Koenig,<br>Leibniz Institut für Biodiversität der Tiere<br>Germany |
| Geijzendorffer, Ilse<br>Senior scientist<br>• Tour du Valat, Research Institute for the conservation<br>of Mediterranean Wetlands<br>France                            | Geise, Lena<br>Associate Professor<br>State University of Rio de Janeiro (UERJ)<br>Brazil                                                | Geiser, Linda<br>Natural Resource Manager<br>USDA-US Forest Service<br>United States of America (the)                                                     |
| Gelink, Henriette Wathne<br>Coordinator, Applied Ecology<br>Inland Norway University of Applied Sciences<br>Norway                                                     | Gelling, Merryl<br>Post-doc Researcher, Zoology<br>University of Oxford<br>United Kingdom of Great Britain and Northern Ireland<br>(the) | Gelsinari, Simone<br>Ph.D. Student<br>Monash University / CSIRO<br>Australia                                                                              |
| Geml, Jozsef<br>Researcher<br>Naturalis Biodiversity Center<br>Netherlands (the)                                                                                       | Genaro, Julio A<br>Entomology<br>Caribbean Natural History Group<br>Canada                                                               | General, David<br>Entomologist<br>University of the Philippines Los Banos<br>Philippines (the)                                                            |
| Genes, Luísa<br>MSc Student / Ecology<br>Universidade Federal do Rio de Janeiro<br>Brazil                                                                              | Genolagani, John-Mark<br>Academic Lecturer and Research Scientist<br>University of Papua New Guimea<br>Papua New Guinea                  | Genovart, Meritxell<br>Postdoctoral researcher<br>CSIC<br>Spain                                                                                           |
| Genovesi, Piero<br>Senior Scientist and Chair IUCN SSC Invasive Species<br>Specialist Group<br>ISPRA - Institute for Environmental Protection and<br>Research<br>Italy | Gensel, Julia<br>M.Sc. Student (Chemistry)<br>Leibniz-Institute of Freshwater Ecology and Inland<br>Fisheries<br>Germany                 | Genthe, Bettina<br>Senior Researcher Environmental Microbiologist<br>Council for Scientific and Industrial Research<br>South Africa                       |
| Gentili, Francesco<br>Researcher<br>Wildlife, Fish and Environmental Studies, Swedish<br>University of Agricultural Sciences<br>Sweden                                 | Genton, Céline<br>Phd, Conservator of protected natural area<br>French Guiana                                                            | Gentry, Matthew<br>Environmental Scientist<br>The Academy of Natural Sciences of Drexel University<br>United States of America (the)                      |

|                                                                                                              |                                                                                                                                                         |                                                                                                                                                                           |
|--------------------------------------------------------------------------------------------------------------|---------------------------------------------------------------------------------------------------------------------------------------------------------|---------------------------------------------------------------------------------------------------------------------------------------------------------------------------|
| Gentsch, Regina<br>Sweden                                                                                    | George, Charles<br>Environmental Scientist<br>Centre for Ecology and Hydrology<br>United Kingdom of Great Britain and Northern Ireland (the)            | George, Robert<br>Masters Candidate of Environmental Science<br>Northern Arizona University<br>United States of America (the)                                             |
| Georges, Arthur<br>Distinguished Professor, Applied Ecology<br>University of Canberra<br>Australia           | Georgian, Samuel<br>Marine Biology<br>Marine Conservation Institute<br>United States of America (the)                                                   | Georgiev, Alexander<br>Lecturer, School of Biological Sciences<br>Bangor University<br>United Kingdom of Great Britain and Northern Ireland (the)                         |
| Geraldes, Pedro Luís<br>Biologist<br>SPEA<br>Portugal                                                        | Gerard, France<br>Senior Scientist, Earth Observation<br>Centre for Ecology and Hydrology<br>United Kingdom of Great Britain and Northern Ireland (the) | Gérard, Imani<br>Lecture<br>Université Officielle de Bukavu<br>Congo (the Democratic Republic of the)                                                                     |
| Gerardin, Théo<br>PhD Student (Forest Ecology and Ecophysiology)<br>INRA<br>France                           | Gerber, Natalie<br>Msc student<br>Bar Ilan University<br>Israel                                                                                         | Gerchman, Yoram<br>Biochemist and Ecologist<br>Oranim college<br>Israel                                                                                                   |
| Gereau, Roy<br>Assistant Curator<br>Missouri Botanical Garden<br>United States of America (the)              | Gergel, Sarah<br>Associate Professor<br>University of British Columbia<br>Canada                                                                        | Gerhardt Braz, Alan<br>PhD student in Ecology<br>Federal University of Rio de Janeiro<br>Brazil                                                                           |
| Gerkey, Drew<br>Anthropology<br>Oregon State University<br>United States of America (the)                    | Gerlach, Alice<br>PhD student<br>Universidade Federal do Rio Grande do Sul<br>Norway                                                                    | Gerlach, Justin<br>College Lecturer<br>Peterhouse, Cambridge<br>United Kingdom of Great Britain and Northern Ireland (the)                                                |
| Gerlach, Philipp<br>Doctoral Researcher<br>Max Planck Institute for Human Development<br>Germany             | GERMAIN, Stephane<br>Research - experimental medicine<br>INSERM<br>France                                                                               | Germano dos Santos, Amédís<br>Prof. Dr. - Anthropology and Civil Law<br>UFVJM - Universidade Federal dos Vales do Jequitinhonha e Mucuri - Minas Gerais, Brasil<br>Brazil |
| Gernaat, Hajo B.P.E.<br>Research Associate Lepidoptera<br>Naturalis Biodiversity Center<br>Netherlands (the) | Geropoulos, Antonios<br>phd student / invasion ecology / marine ecology<br>University of Crete<br>Greece                                                | Gerphagnon, Mélanie<br>Post Doctoral position in Microbial Ecology<br>IGB, berlin<br>Germany                                                                              |



|                                                                                                                                           |                                                                                                                                              |                                                                                                                                                             |
|-------------------------------------------------------------------------------------------------------------------------------------------|----------------------------------------------------------------------------------------------------------------------------------------------|-------------------------------------------------------------------------------------------------------------------------------------------------------------|
| Gerring, Peter<br>Marine Geology Technician<br>National Institute of Water and Atmospheric Research<br>New Zealand                        | Gerstner, Katharina<br>PostDoc<br>German Centre for Integrative Biodiversity Research<br>(iDiv) Halle-Jena-Leipzig<br>Germany                | Gertum Becker, Fernando<br>Professor, Ecology<br>Departamento de Ecologia, Instituto de Biociências,<br>Universidade Federal do Rio Grande do Sul<br>Brazil |
| Gervais, Jennifer<br>Wildlife Ecologist<br>Oregon Wildlife Institute<br>United States of America (the)                                    | Gérvás, Juan<br>Visiting Professor International Health<br>National School of Public Health, Madrid<br>Spain                                 | Gervascio, Timothy<br>Evolutionary Biology<br>United States of America (the)                                                                                |
| Geslin, Benoît<br>Lecturer<br>Aix Marseille Univ, Univ Avignon, CNRS, IRD, IMBE,<br>Marseille<br>France                                   | Gessner, Mark O.<br>Professor of Applied Aquatic Ecology<br>Leibniz Institute of Freshwater Ecology and Inland<br>Fisheries (IGB)<br>Germany | Getchell, Rodman<br>Assistant Research Professor<br>Cornell University<br>United States of America (the)                                                    |
| Gettinger, Donald<br>Parasitology and Medical Entomology<br>Harold W. Manter Laboratory of Parasitology<br>United States of America (the) | Geuer, Jana<br>Alfred Wegener Institute Helmholtz Centre for Polar und<br>Marine Research<br>Germany                                         | Ghadirian, Taher<br>Iran (Islamic Republic of)                                                                                                              |
| Gharasoo, Mehdi<br>Computational Hydrogeochemistry<br>HelmholtzZentrum München<br>Germany                                                 | Ghasemi, Benjamin<br>PhD Student<br>Texas A&M University<br>United States of America (the)                                                   | Ghassib, Humam *<br>Professor of Theoretical Physics<br>The University of Jordan<br>Jordan                                                                  |
| Ghavanini, Ali<br>Karolinska Institutet<br>Sweden                                                                                         | Ghedotti, Michael<br>Professor of Biology<br>Regis University<br>United States of America (the)                                              | Ghestemme, Thomas<br>Conservation officer<br>SOP MANU NGO/Birdlife partner<br>French Polynesia                                                              |
| GHIGLIONE, Matias<br>Professor and Researcher, Geology<br>Universidad de Buenos Aires<br>Argentina                                        | Ghoddousi, Arash<br>Postdoctoral research / conservation science<br>Humboldt University of Berlin, Germany<br>Iran (Islamic Republic of)     | Ghorbani, Abdolbaset<br>Researcher<br>Uppsala University<br>Sweden                                                                                          |
| Giacoma, Cristina<br>Full Professor Zoology<br>University of Torino<br>Italy                                                              | Giacomin, Leandro L.<br>Adjunct Professor<br>Universidade Federal do Oeste do Pará<br>Brazil                                                 | Giakoumi, Sylvaine<br>Researcher<br>University of Nice Sophia Antipolis - CNRS<br>France                                                                    |
| Giaretta, Augusto<br>PhD student<br>São Paulo University<br>Brazil                                                                        | Giavelli, Giovanni<br>(former) U. Researcher in Ecology<br>Univ. of Parma<br>Italy                                                           | giba, Zlatko<br>Professor of Plant Physiology<br>Faculty of Biology<br>Serbia                                                                               |

|                                                                                                                                       |                                                                                                                      |                                                                                                                                       |
|---------------------------------------------------------------------------------------------------------------------------------------|----------------------------------------------------------------------------------------------------------------------|---------------------------------------------------------------------------------------------------------------------------------------|
| Gibbs, Allen G.<br>Professor, School of Life Sciences<br>University of Nevada, Las Vegas<br>United States of America (the)            | Gibbs, Jason<br>Assistant Professor<br>University of Manitoba<br>Canada                                              | Gibbs, Joan<br>Lecturer in Ecology and Restoration<br>University of South Australia<br>Australia                                      |
| Gibeau, Pascale<br>PhD Candidate Ecology and Biologist<br>Simon Fraser University<br>Canada                                           | Gibert, Corentin<br>Paleontologist<br>Lyon 1<br>France                                                               | Giberto, Diego<br>Researcher<br>National Council of Scientific Research of Argentina<br>(CONICET)<br>Argentina                        |
| Gibon, Francois-Marie<br>Senior scientist<br>Institut de Recherche pour le Développement<br>France                                    | Gibson, Dan<br>Population ecologist<br>Virginia Tech<br>United States of America (the)                               | Gibson, Gary<br>Fisheries Biologist<br>Oregon Dept. of Fish and Wildlife (retired)<br>United States of America (the)                  |
| Gibson, Kara<br>PhD student, Biology<br>Northern Arizona University<br>United States of America (the)                                 | Gibson, Valerie<br>PhD candidate<br>Latrobe university<br>Australia                                                  | Gich, Martí<br>Tenured Scientist/Materials Science<br>Consejo Superior de Investigaciones Cientificas<br>Spain                        |
| Gidley, David<br>Professor Emeritus of Physics<br>University of Michigan<br>United States of America (the)                            | Giehl, Nubia<br>PhD student in Ecology and Conservation<br>University of the State of Mato Grosso - UNEMAT<br>Brazil | Gierkink, Max<br>Research Consultant - Energy Economics<br>ewi Energy & Research Scenarios<br>Germany                                 |
| Giglio, Vinicius<br>Ph.D. candidate<br>Universidade Federal do Rio de Janeiro<br>Brazil                                               | GIGORD, Luc<br>Head - Biodiversity<br>Conservatoire Botanique National de Mascarin<br>France                         | Gil, Artur<br>Post-Doctoral Researcher in Environmental and<br>Geospatial Sciences<br>University of the Azores<br>Portugal            |
| Gil, Diego<br>Behavioural Ecology<br>CSIC<br>Spain                                                                                    | Gil, Orlando<br>Adjunct Assistant Professor in Biology<br>Hunter College<br>United States of America (the)           | Gil de Sola, Luis *<br>Tenured scientist<br>Spanish Oceanographic Institute<br>Spain                                                  |
| Gil Pérez, Daniel<br>University Professor<br>Universitat de València<br>Spain                                                         | Gilbert, Alejandra<br>PhD student/Environmental toxicology<br>Spain                                                  | Gilbert, Deon<br>Threatened Species Project Officer - Herpetofauna<br>Zoos Victoria/PhD Student University of Wollongong<br>Australia |
| Gilbert, Francis<br>Professor of Ecology<br>University of Nottingham<br>United Kingdom of Great Britain and Northern Ireland<br>(the) | Gilbert, Guillermo<br>Ecuador                                                                                        | Gilbert, Neil<br>Graduate Student<br>University of Alabama<br>United States of America (the)                                          |

|                                                                                                                 |                                                                                                                                                                |                                                                                                                                 |
|-----------------------------------------------------------------------------------------------------------------|----------------------------------------------------------------------------------------------------------------------------------------------------------------|---------------------------------------------------------------------------------------------------------------------------------|
| Gilbert, Tania<br>Conservation Biologist<br>United Kingdom of Great Britain and Northern Ireland (the)          | Gilder, Thandi<br>Lecturer<br>Bangor University School of Psychology<br>United Kingdom of Great Britain and Northern Ireland (the)                             | Gilgert, Wendell<br>Director, Working Lands Program<br>Point Blue Conservation Science<br>United States of America (the)        |
| Gill, Bruce<br>Retired Research Scientist<br>Canadian Food Inspection Agency<br>Canada                          | Gill, Carissa<br>Ecologist<br>Sunshine Coast university<br>Australia                                                                                           | Gill, Cynthia<br>Associate Professor of Physiology<br>Hampshire College<br>United States of America (the)                       |
| Gill, Jacquelyn<br>Assistant Professor of Paleoecology<br>University of Maine<br>United States of America (the) | Gill, Jennifer<br>Professor of Applied Ecology<br>University of East Anglia<br>United Kingdom of Great Britain and Northern Ireland (the)                      | Gill, Nicole<br>Invasive species management<br>Australia                                                                        |
| Gill, Tony<br>Remote Sensing<br>NSW Office of Environment and Heritage<br>Australia                             | Gillefalk, Mikael<br>PhD Student / Ecosystem Research<br>Leibniz-Institute of Freshwater Ecology and Inland Fisheries<br>Germany                               | Gillespie, Kyle<br>PhD Candidate -- Marine Ecology, fisheries, and conservation<br>The University of British Columbia<br>Canada |
| Gillespie, Lauren<br>Centre National de Recherche Scientifique<br>France                                        | Gillespie, Thomas<br>Associate Professor / Environmental Sciences<br>Emory University<br>United States of America (the)                                        | Gillespie, Thomas<br>Professor<br>UCLA<br>United States of America (the)                                                        |
| Gillet, François<br>Professor of ecology<br>Université Bourgogne Franche-Comté<br>France                        | Gillett, Conrad P.D.T.<br>Postdoctoral Research Scholar<br>University of Hawai'i<br>United States of America (the)                                             | Gillikin, David<br>Associate Professor of Geology<br>Union College<br>United States of America (the)                            |
| Gillings, Michael<br>Professor of Molecular Evolution<br>Macquarie University<br>Australia                      | Gillis, Lucy Gwen<br>Post-doctorate<br>Leibniz-Zentrum für Marine Tropenforschung<br>Germany                                                                   | Gil-Martinez, Marta<br>Spain                                                                                                    |
| Gilmore, Alexander<br>Ecologist<br>Bush Heritage Australia<br>Australia                                         | Gilmore, Michelle<br>Staff Research Associate, Southern Sierra Critical Zone Observatory<br>University of California, Merced<br>United States of America (the) | Gilmour, Molly<br>Biologist<br>University of Queensland<br>Australia                                                            |
| Gilot-Fromont, Emmanuelle<br>Professor in epidemiology<br>VetAgro Sup<br>France                                 | Gilroy, James<br>Lecturer in Ecology<br>University of East Anglia<br>United Kingdom of Great Britain and Northern Ireland (the)                                | Gilroy, Michelle<br>Fisheries Biologist<br>United States of America (the)                                                       |

|                                                                                                                                                                      |                                                                                                                                       |                                                                                                                             |
|----------------------------------------------------------------------------------------------------------------------------------------------------------------------|---------------------------------------------------------------------------------------------------------------------------------------|-----------------------------------------------------------------------------------------------------------------------------|
| GIL-SANTANA, HELCIO REINALDO<br>ENTOMOLOGIST<br>OSWALDO CRUZ INSTITUTE<br>Brazil                                                                                     | Gil-Uriarte, Endika<br>PhD candidate, marine ecotoxicology<br>Plentzia Marine Station (PiE) UPV/EHU<br>Spain                          | Gimenez, Iria<br>PhD Candidate<br>Oregon State University<br>United States of America (the)                                 |
| Giménez, Andrés<br>Professor of Ecology<br>Miguel Hernández University of Elche<br>Spain                                                                             | Giménez, Joan<br>PhD student<br>Estación Biológica de Doñana - Consejo Superior de<br>Investigaciones Científicas (EBD-CSIC)<br>Spain | Gimeno-Colera, Cristina<br>Senior researcher<br>Fundación Centro de Estudios del Mediterráneo<br>Spain                      |
| Gimona, Alessandro<br>Senior scientist<br>The James Hutton Institute<br>United Kingdom of Great Britain and Northern Ireland<br>(the)                                | Gioda, Alain<br>Climatology<br>IRD<br>France                                                                                          | Gionchetta, Giulia<br>Spain                                                                                                 |
| Gioria, Margherita<br>Research Fellow<br>Italy                                                                                                                       | Giovannelli, Adriano<br>Full Professor in the field of Juridical Sciences<br>University of Genoa<br>Italy                             | Gipperth, Lena<br>Professor in Environmental law<br>University of Gothenburg<br>Sweden                                      |
| Gippet, Jérôme M. W.<br>PhD in Ecology<br>Université CLaude Bernard Lyon 1<br>France                                                                                 | Gippoliti, Spartaco<br>Zoologist<br>Società Italiana per la Storia della Fauna "Giuseppe<br>Altobello"<br>Italy                       | Giraldo, Alan<br>Professor Departament of Biology<br>Universidad del Valle<br>Colombia                                      |
| Girard, Pierre<br>Professor in Hydroecology<br>Universidade Federal de Mato Grosso<br>Brazil                                                                         | Girardin, Cecile<br>Researcher<br>Oxford University<br>United Kingdom of Great Britain and Northern Ireland<br>(the)                  | Giraudoux, Patrick<br>Professor of Ecology<br>University of Franche-Comté and Institut Universitaire de<br>France<br>France |
| Girling, Robbie<br>Lecturer in Agroecology and Sustainable Agriculture<br>The University of Reading<br>United Kingdom of Great Britain and Northern Ireland<br>(the) | Giroldo, Aelton<br>Professor EBTT<br>Instituto Federal de Educação, Ciência e Tecnologia do<br>Ceará<br>Brazil                        | Gish, Moshe<br>Researcher, Ecology<br>University of Haifa<br>Israel                                                         |
| Giurfa, Martin<br>Institute Director, Excellence-Class Professor<br>CNRS - University Paul Sabatier - Toulouse<br>France                                             | Gjelland, Karl<br>Ecologist<br>Norwegian Institute for Nature Research<br>Norway                                                      | Glaser, Karin<br>Biology<br>University of Rostock<br>Germany                                                                |
| Glassom, David<br>Academic, marine biology<br>University of KwaZulu-Natal<br>South Africa                                                                            | Gleason, Christine<br>PhD Candidate, Conservation Biology<br>George Mason University<br>United States of America (the)                | Gleiber, Miram<br>PhD Candidate<br>Oregon State University<br>United States of America (the)                                |

|                                                                                                                                     |                                                                                                                                            |                                                                                                                                                                                                    |
|-------------------------------------------------------------------------------------------------------------------------------------|--------------------------------------------------------------------------------------------------------------------------------------------|----------------------------------------------------------------------------------------------------------------------------------------------------------------------------------------------------|
| Glen, Al<br>Wildlife Ecologist<br>Landcare Research<br>New Zealand                                                                  | Glen, Hugh<br>retired plant taxonomist<br>formerly with SANBI<br>South Africa                                                              | Glenn, Betsy<br>Ecologist<br>Oregon State University<br>United States of America (the)                                                                                                             |
| gLIOZZI, Elsa<br>Full Professor of Paleontology and Paleoecology<br>Department of Science - Roma Tre University<br>Italy            | Glippa, Olivier<br>Postdoctoral researcher<br>Novia University of Applied Sciences<br>Finland                                              | Glisson, Wesley<br>Ecology Research Fellow<br>United States of America (the)                                                                                                                       |
| Gloder, Gabriele<br>Evolutionary biologist<br>University of Liverpool<br>United Kingdom of Great Britain and Northern Ireland (the) | Glon, Mael<br>Ph.D. Student<br>The Ohio State University<br>United States of America (the)                                                 | Glos, Julian<br>Scientist, PhD<br>University of Hamburg<br>Germany                                                                                                                                 |
| Gluck, John<br>Psychology/Bioethics<br>University of New Mexico<br>United States of America (the)                                   | Glue, Matthew<br>Marine Biology<br>University of Essex<br>United Kingdom of Great Britain and Northern Ireland (the)                       | Glynne, Elizabeth<br>Masters Student - Biology<br>SHSU<br>United States of America (the)                                                                                                           |
| Gmel, Gerhard<br>Senior Scientist<br>Lausanne Uniniversity Hospital<br>Switzerland                                                  | Gobert, Stefan<br>Biologist<br>Hasselt University<br>Belgium                                                                               | GOCHFELD, MICHAEL<br>Professor Emeritus of Environmental and Occupational<br>Medicine<br>Rutgers Robert Wood Johnson Medical School & School<br>of Public Health<br>United States of America (the) |
| Goczalk, Emily<br>graduate student, ALM Biology<br>Harvard Extension School<br>United States of America (the)                       | Godde, Cecile<br>Food Systems<br>Australia                                                                                                 | Godin-Beekmann, Sophie<br>Director of Research, Atmospheric Physics and Chemistry<br>CNRS<br>France                                                                                                |
| Godinez, Ed<br>University Student<br>Philippines (the)                                                                              | Godinho, Carlos<br>Pos-doc researcher - Ecology<br>University of Évora<br>Portugal                                                         | Godley, Brendan<br>Professor<br>University of Exeter<br>United Kingdom of Great Britain and Northern Ireland (the)                                                                                 |
| Godoy, Bruno<br>Professor / Ecology<br>UFPA<br>Brazil                                                                               | Godoy-Faúndez, Alex<br>Director, Centro de investigación en Sustentabilidad<br>Facultad de Ingeniería, Universidad del Desarrollo<br>Chile | Godwin, Sean<br>PhD Candidate<br>Simon Fraser University<br>Canada                                                                                                                                 |

|                                                                                                                    |                                                                                                                                                                                                                                                                                                                            |                                                                                                                                                                  |
|--------------------------------------------------------------------------------------------------------------------|----------------------------------------------------------------------------------------------------------------------------------------------------------------------------------------------------------------------------------------------------------------------------------------------------------------------------|------------------------------------------------------------------------------------------------------------------------------------------------------------------|
| Goehlich, Henry<br>Marine Biologist<br>GEOMAR<br>Germany                                                           | Goeller, Brandon<br>PhD student in freshwater ecology<br>University of Canterbury<br>New Zealand                                                                                                                                                                                                                           | Goepel, Jan<br>PostDoc Land-use change modeling/Scenarios of land-use change<br>University of Kassel/Center for environmental systems research (CESR)<br>Germany |
| Goeptar, Hemwatie<br>BSc<br>Private<br>Suriname                                                                    | Goette, Sebastian<br>mathematics<br>Universität Freiburg<br>Germany                                                                                                                                                                                                                                                        | Goetz, Scott<br>Professor<br>Northern Arizona University<br>United States of America (the)                                                                       |
| Goffinet, Bernard<br>Professor Evolutionary Biology<br>University of Connecticut<br>United States of America (the) | Gogarten, Jan Frederik<br>Postdoctoral fellow<br>Center for Infection & Immunity, Columbia University<br>Mailman School of Public Health; Epidemiology of Highly Pathogenic Microorganisms, Robert Koch Institute;<br>Institute of Microbiology and Epizootics, Freie Universität Berlin<br>United States of America (the) | Goh, Hong Ching<br>Senior lecturer, natural resource governance<br>University of Malaya<br>Malaysia                                                              |
| Goheen, Sara<br>Oceanographic Engineer<br>Scripps Institution of Oceanography<br>United States of America (the)    | Goijman, Andrea<br>Researcher<br>Instituto de Recursos Biologicos, Instituto Nacional de Tecnologia Agropecuaria (INTA)<br>Argentina                                                                                                                                                                                       | Goiran, Claire<br>Marine Biology<br>Université de la Nouvelle-Calédonie<br>New Caledonia                                                                         |
| GOITA, Kalifa<br>Professor remote sensing<br>Université de Sherbrooke<br>Canada                                    | gokalp, mert<br>Phd student / director /writer / photographer /<br>Wageningen University<br>Turkey                                                                                                                                                                                                                         | Golcher-Benavides, Jimena<br>PhD student in Ecology<br>University of Wyoming<br>Costa Rica                                                                       |
| Gold, Michele<br>Biologist<br>UNAM<br>Mexico                                                                       | Goldammer, Johann Georg<br>Director, Global Fire Monitoring Center (GFMC)<br>Max Planck Institute for Chemistry, Fire Ecology Research Group<br>Germany                                                                                                                                                                    | Goldarazena, Arturo<br>Entomologist. Researcher<br>Universite Catholique de Louvain, Earth and Life Institute<br>Belgium                                         |
| Goldbach, Lars<br>Germany                                                                                          | Goldberg, Michel<br>Associate professor in biochemistry<br>Université de La Rochelle<br>France                                                                                                                                                                                                                             | Golden Kroner, Rachel<br>PhD Candidate, Environmental Science and Policy<br>George Mason University<br>United States of America (the)                            |

|                                                                                                                                                                   |                                                                                                                                                                            |                                                                                                                                                                    |
|-------------------------------------------------------------------------------------------------------------------------------------------------------------------|----------------------------------------------------------------------------------------------------------------------------------------------------------------------------|--------------------------------------------------------------------------------------------------------------------------------------------------------------------|
| Goldfarb, Kathryn<br>Assistant Professor, Anthropology<br>University of Colorado at Boulder<br>United States of America (the)                                     | Golding, Sophie<br>Ecologist<br>Australia                                                                                                                                  | Goldney, Giles<br>Lecturer, Conservation and Land Management. BAppSc<br>Conservation and Park Management, University of South<br>Australia<br>TAFE SA<br>Australia |
| Goldschmidt, Tom<br>Biologist<br>Zoologische Staatssammlung München<br>Germany                                                                                    | Goldstein, Bernard<br>Professor Emeritus of Environmental and Occupational<br>Health<br>Univ Pittsburgh Graduate School of Public Health<br>United States of America (the) | Goldstein, Vicki N.<br>Executive Director<br>Inland Ocean Coalition<br>United States of America (the)                                                              |
| Golemansky, Vassil *<br>Professor, Zoologist, Member of Bulgarian Academy of<br>Sciences<br>Bulgarian Academy of Sciences<br>Bulgaria                             | Gollan, Gereon<br>Research Scientist / Meteorologist<br>GEOMAR Helmholtz Centre for Ocean Research Kiel<br>Germany                                                         | Gollifer, David<br>Agronomy<br>Dala Research Station 1967-1975<br>Solomon Islands                                                                                  |
| Golnar, Andrew<br>Graduate Student<br>Texas A&M University<br>United States of America (the)                                                                      | Golob, Ursa<br>Associate Professor, Corporate Social Responsibility<br>University of Ljubljana, Faculty of Social Sciences<br>Slovenia                                     | Golubov, Jordan<br>Professor<br>Mexico                                                                                                                             |
| Golubtsov, Alexander<br>Dr.Sci. in Ichthyology<br>A.N. Severtsov Institute of Ecology and Evolution of<br>Russian Academy of Sciences<br>Russian Federation (the) | Gombart, Adrian<br>Associate Professor/Biochemistry and Biophysics, Linus<br>Pauling Institute<br>Oregon State University<br>United States of America (the)                | Gomes, Beatriz<br>Botanist<br>USP<br>Brazil                                                                                                                        |
| Gomes, Beatriz<br>Brazil                                                                                                                                          | Gomes, Daniel<br>Information Scientist and Linguist<br>Universidade Federal do Pará<br>Brazil                                                                              | Gomes, Fernanda<br>Departament of Ecology<br>UFRJ<br>Brazil                                                                                                        |
| Gomes, Louise Cristina<br>Master degree<br>State University of Maringá<br>Brazil                                                                                  | Gomes, Raquel<br>Postdoctoral researcher<br>State University of Campinas<br>Brazil                                                                                         | Gomes, Samara<br>PhD student<br>Center for Development Research<br>Brazil                                                                                          |
| Gomes, Thiago<br>PhD Candidate in Ecology<br>Universidade Federal de Santa Catarina<br>Brazil                                                                     | Gomes, Vicente<br>Biologist<br>University of São Paulo<br>Brazil                                                                                                           | Gomes de Carvalho, André Luiz<br>Postdoctoral fellow<br>Instituto de Biociências, Universidade de São Paulo<br>Brazil                                              |
| Gomes Fischer, Luciano<br>Professor of Biological Oceanography<br>Universidade Federal do Rio de Janeiro<br>Brazil                                                | Gomes-Jaintilal, Iara<br>Veterinarian/ Researcher<br>Eduardo Mondlane University<br>Mozambique                                                                             | Gomez, Alicia<br>Scientific technician Scientific services<br>Ezemvelo KZN Wildlife<br>South Africa                                                                |

\* indicates individual also signed 1992 Scientists' Warning to Humanity

|                                                                                                                          |                                                                                                                      |                                                                                                                                                                                     |
|--------------------------------------------------------------------------------------------------------------------------|----------------------------------------------------------------------------------------------------------------------|-------------------------------------------------------------------------------------------------------------------------------------------------------------------------------------|
| Gomez, Camila<br>Biologist<br>Universidad de Los Andes<br>Colombia                                                       | Gomez, Manuel J.<br>Senior Technician, Bioinformatics<br>National Centre for Cardiovascular Research (CNIC)<br>Spain | Gomez, Mario Alejandro<br>Biologist, researcher<br>UNAM<br>Mexico                                                                                                                   |
| Gomez, Roberto<br>PhD student<br>Oregon State University<br>United States of America (the)                               | Gomez, Zulema<br>Postdoctoral Researcher<br>University of California, Irvine<br>United States of America (the)       | Gómez, Tomás<br>Director<br>Primary Care Research Foundation of Madrid<br>Spain                                                                                                     |
| Gómez de Dios, Miguel Ángel<br>Forest engineer - Pest Control - Entomology<br>(Coleopterology)<br>Spain                  | Gomez Diaz, Jorge Antonio<br>Postdoctoral researcher, Plant ecology<br>Instituto de Ecologia A.C.<br>Mexico          | Gómez Nácher, Evarist<br>Guarda d'Espais Naturals<br>Spain                                                                                                                          |
| Gomez Pinchetti, Juan Luis<br>Spanish Bank of Algae / IOCAG / Dpt. Biology<br>Universidad de Las Palmas de G.C.<br>Spain | Gomez Posada, Carolina<br>Conservation Biology<br>Instituto Alexander von Humboldt<br>United States of America (the) | Gómez Roca, Alejandro<br>Postdoc research<br>Instituto Catalán de Nanociencia y Nanotecnología<br>Spain                                                                             |
| Gómez-Cerezo, Rosa<br>Professor in Ecology<br>University of Murcia<br>Spain                                              | Gomez-Heras, Miguel<br>Assistant Professor / Geology<br>Universidad Autonoma de Madrid<br>Spain                      | Gomez-Martin, Tomas<br>Research<br>Universidad de Zaragoza<br>Spain                                                                                                                 |
| Gómez-Ramos, Pilar<br>Cell Biology retired full professor<br>Autonoma University of Madrid<br>Spain                      | Goncalves, David<br>Associate Professor Biology<br>University of Saint Joseph<br>Macao                               | goncalves, gabriela<br>PhD. Candidate<br>Universidade Federal do Pará/Museu Emilio Goeldi<br>Brazil                                                                                 |
| Gonçalves, Alany Pedrosa<br>PhD Student<br>National Institute of Amazonian Research - INPA<br>Brazil                     | Gonçalves, Clayton<br>Phd student<br>Universidade Federal do Rio de Janeiro<br>Brazil                                | Gonçalves, David<br>Post-doctoral Researcher<br>University of Coimbra<br>Portugal                                                                                                   |
| Gonçalves, Duarte<br>PhD Student, Biology<br>University of Porto<br>Portugal                                             | Gonçalves, Elizabeth<br>Professora<br>Universidade do Estado da Bahia<br>Brazil                                      | Gonçalves, Fernando<br>Postdoctoral Research<br>Universidade Estadual Paulista (UNESP), Instituto de<br>Biotecnologia, Departamento de Ecologia, Rio Claro, SP,<br>Brasil<br>Brazil |
| Gonçalves, Gabriela<br>PhD. Candidate<br>Universidade Federal do Pará/Museu Emilio Goeldi<br>Brazil                      | Gonçalves, Juliana<br>Brazil                                                                                         | Gonçalves, Lucas Eduardo<br>Student<br>Federal University of São Paulo<br>Brazil                                                                                                    |



|                                                                                                                                      |                                                                                                                                                                                                                              |                                                                                                              |
|--------------------------------------------------------------------------------------------------------------------------------------|------------------------------------------------------------------------------------------------------------------------------------------------------------------------------------------------------------------------------|--------------------------------------------------------------------------------------------------------------|
| Gonçalves, Maria Isabel<br>Marine Biologist<br>Gonçalves<br>Portugal                                                                 | Gonçalves, Maycon<br>Phd student<br>University of Valencia, Spain<br>Brazil                                                                                                                                                  | Gonçalves, Susana C.<br>Fungal Ecologist<br>Centre for Functional Ecology, University of Coimbra<br>Portugal |
| Gonçalves, Vasco<br>CEO of SDNC sàrl a.k.a. EVA Smart City<br>Luxembourg                                                             | Gonçalves Couto Sette de Almeida, Ivy<br>Engenheira agrônoma<br>UESC - BA<br>Brazil                                                                                                                                          | Gonçalves da Silva, Luís Fernando<br>Estudante<br>Jardim Botânico do Rio de Janeiro - JBRJ<br>Brazil         |
| Goncalves Lhano, Marcos<br>Professor<br>Universidade Federal do Recôncavo da Bahia<br>Brazil                                         | Gonçalves Ortega, Jean Carlo<br>PhD. Student in Ecology<br>Universidade Estadual de Maringá<br>Brazil                                                                                                                        | Gonçalves-Seco, Luís<br>Assistant Professor<br>University Institute of Maia<br>Portugal                      |
| Goncalves-Souza, Thiago<br>Associate Professor<br>UFRPE<br>Brazil                                                                    | Gonder, Mary Katherine<br>Associate Professor<br>Drexel University<br>United States of America (the)                                                                                                                         | Gonella, Paulo M.<br>Botany<br>Brazil                                                                        |
| Gonev, Andrej<br>Ecology student<br>Faculty of Natural Sciences and Mathematics<br>Macedonia, Republic of (the former Yugoslavia)    | Gongalsky, Konstantin B.<br>Research Scientist in Ecology<br>Severtsov Institute of Ecology and Evolution, Russian<br>Academy of Sciences<br>Russian Federation (the)                                                        | Gonzalez, Adriana<br>PhD student<br>CAU Kiel<br>Germany                                                      |
| Gonzalez, Andrew<br>Professor and researcher Environmental science<br>McGill University<br>Canada                                    | Gonzalez, Aridane G.<br>Postdoctoral Scientist / Marine Chemistry<br>Universite de Bretagne Occidentale. University Institute<br>European De La Mer. (Laboratoire des sciences de<br>l'environnement marin (LEMAR)<br>France | Gonzalez, Carmen<br>Lawyer<br>Spain                                                                          |
| Gonzalez, Eduardo<br>Research Associate, Ph.D. Riparian Plant Ecology<br>Colorado State University<br>United States of America (the) | Gonzalez, Ivan<br>Ecologist. Assisstan researcher<br>National Biodiversity Institute<br>Colombia                                                                                                                             | Gonzalez, Jesus<br>Biology<br>retired<br>United States of America (the)                                      |
| Gonzalez, Lisa<br>Assistant Collections Manager, Entomology<br>Natural History Museum of LA County<br>United States of America (the) | Gonzalez, Raul<br>Independent Researcher; Professor. Marine Biology and<br>Fisheries<br>Universidad Nacional el Comahue<br>Argentina                                                                                         | González, Alejandro<br>Postdoctoral researcher<br>Real Jardín Botánico , CSIC<br>Spain                       |
| González, Edgar J.<br>Associate Professor, Quantitative Ecology<br>UNAM<br>Mexico                                                    | González, Ezequiel<br>Ph.D. - Postdoctoral researcher - Insect Ecology<br>IMBIV (CONICET - Universidad Nacional de Córdoba)<br>Argentina                                                                                     | González, José M.<br>Assistant professor, ecology<br>Universidad Rey Juan Carlos<br>Spain                    |

|                                                                                                                              |                                                                                                                                                        |                                                                                                                                                |
|------------------------------------------------------------------------------------------------------------------------------|--------------------------------------------------------------------------------------------------------------------------------------------------------|------------------------------------------------------------------------------------------------------------------------------------------------|
| González, Luís<br>Professor of Plant Physiology<br>University of Vigo<br>Spain                                               | González, Mauro<br>Professor<br>Universidad Austral de Chile<br>Chile                                                                                  | Gonzalez de Zayas, Roberto *<br>Researcher<br>Centro de Investigaciones de Ecosistemas Costeros<br>Cuba                                        |
| González Guzmán, Adrián<br>PhD Soil science<br>University of cordoba<br>Portugal                                             | González Reyes, Luis<br>Doctor in Chemistry<br>Spain                                                                                                   | Gonzalez Rodriguez, Antonio<br>Researcher<br>National Autonomous University of Mexico<br>Mexico                                                |
| Gonzalez Suarez, Manuela<br>Lecturer<br>University of Reading<br>United Kingdom of Great Britain and Northern Ireland (the)  | González-Acosta, Adrián F.<br>Professor-Researcher<br>Instituto Politecnico Nacional-Centro Interdisciplinario de Ciencias Marinas<br>Mexico           | Gonzalez-Bernal, Alejandro<br>PhD Student<br>UNAM<br>Mexico                                                                                    |
| González-Calvo, Inés<br>PhD student<br>CIRB, Collège de France<br>France                                                     | Gonzalez-Candelas, Luis<br>Research Scientist<br>Spanish National Research Council<br>Spain                                                            | González-Chang, Mauricio<br>Agroecologist, entomologist, ecologist, PhD.<br>Chile                                                              |
| Gonzalez-Elizondo, M. Socorro<br>Researcher<br>Instituto Politecnico Nacional<br>Mexico                                      | Gonzalez-Gaya, Belen<br>Postdoctoral researcher in Environmental Pollution<br>IMDEA Water<br>Spain                                                     | Gonzalez-Martinez, Santiago<br>Research Director (Forest Genetics)<br>INRA<br>France                                                           |
| González-Murcia, Saúl<br>Researcher/Marine Biology and Ecology<br>UDP Ciencias Neotropicales/NGO NaturalEISA<br>El Salvador  | González-Pérez, José A.<br>IRNAS-CSIC<br>Spain                                                                                                         | González-Reyes, Acaimo<br>Researcher/Developmental Biology<br>Spanish National Research Council<br>Spain                                       |
| Gonzalez-Rodriguez, David<br>Professor<br>Spain                                                                              | González-Sanchis, María<br>PhD<br>Universitat Politénica de Valencia<br>Spain                                                                          | Gonzalez-Trujillo, Juan David<br>PhD student<br>Universidad Nacional de Colombia<br>Colombia                                                   |
| González-Varo, Juan P.<br>Ecologist<br>University of Cambridge<br>United Kingdom of Great Britain and Northern Ireland (the) | Gonzalez-Voyer, Alejandro<br>Associate Professor, Biology<br>Universidad Nacional Autónoma de México<br>Mexico                                         | Goodale, Eben<br>Professor, Ecologist<br>Guangxi University<br>China                                                                           |
| Goodale, Uromi<br>Associate Professor/ Ecology<br>Guangxi University<br>China                                                | Goodall, Jane<br>Ph.D., DBE Founder, the Jane Goodall Institute, UN Messenger of Peace<br>The Jane Goodall Institute<br>United States of America (the) | Goode, Matt<br>Research Scientist, Ecologist, Conservation Biologist, Herpetologist<br>University of Arizona<br>United States of America (the) |

|                                                                                                                  |                                                                                                                       |                                                                                                                                               |
|------------------------------------------------------------------------------------------------------------------|-----------------------------------------------------------------------------------------------------------------------|-----------------------------------------------------------------------------------------------------------------------------------------------|
| Gooden, Ben<br>Lecturer<br>University of Wollongong<br>Australia                                                 | Goodenough, Katharine<br>Ecology and Conservation Biology<br>University of Oklahoma<br>United States of America (the) | Goodman, Elizabeth<br>Ecologist<br>United Kingdom of Great Britain and Northern Ireland<br>(the)                                              |
| Goodman, Jesse<br>Mathematics and statistics<br>University of Auckland<br>New Zealand                            | Goodman, Peter<br>Conservation Biologist<br>Wildlife Conservation Solutions<br>South Africa                           | Goodman, Rosa<br>Assoc. Sr. Lecturer - Forest Management<br>Swedish University of Agricultural Sciences (SLU)<br>Sweden                       |
| Goodman, Steve<br>MacArthur Field Biologist<br>Field Museum of Natural History<br>United States of America (the) | Goodman Tchernov, Beverly<br>Asst. Professor, Marine Geology<br>University of Haifa<br>Israel                         | Goodrich, John<br>Biologist<br>Panthera<br>United States of America (the)                                                                     |
| Goordial, jacqueline<br>Microbial Ecologist<br>Canada                                                            | Goosem, Miriam<br>Adjunct Principal Research Fellow<br>James Cook University<br>Australia                             | Gopakumar, Rajesh<br>Senior Professor and director ICTS-TIFR, Physicist<br>International centre for theoretical sciences (ICTS-TIFR)<br>India |
| Gopalkrishnan, Narayan<br>Course Coordinanator, Social Work<br>James Cook University<br>Australia                | Gopaul, Sunil<br>Environmental Scientist<br>University of the South Pacific<br>Guyana                                 | Gordon, Ascelin<br>Senior Research Fellow<br>RMIT University<br>Australia                                                                     |
| Gordon, Galena<br>Biology Adjunct /Sci Tech<br>Glendale Community College<br>United States of America (the)      | Gordon, Iain<br>Deputy Vice Chancellor - Tropical Environments &<br>Societies<br>James Cook University<br>Australia   | Gordon, Mark<br>Independent Researcher in Evolutionary Ecology<br>United States of America (the)                                              |
| Gordon, Mathilde<br>Field officer in Land Management and Conservation<br>Ecosure<br>Australia                    | Gordon, Neil<br>Meteorologist<br>New Zealand                                                                          | Gordon, Noah<br>Associate Professor of Biology<br>University of Evansville<br>United States of America (the)                                  |
| Gordon, Rachel<br>Ecologist PhD<br>United Kingdom of Great Britain and Northern Ireland<br>(the)                 | Gordon-Werner, Elizabeth<br>Scientist/Artist<br>Australia                                                             | Gore, Damian<br>Professor in Environmental Sciences<br>Macquarie University<br>Australia                                                      |
| Gorgopa, Stefania<br>MSC candidate<br>University of Victoria<br>Canada                                           | Goris, Tobias<br>Research Scientist, Microbiology<br>Friedrich Schiller University Jena<br>Germany                    | gornev, galin<br>professor emeritus<br>bulgarian academy of sciences<br>Bulgaria                                                              |

|                                                                                                                              |                                                                                                                                        |                                                                                                                                                                              |
|------------------------------------------------------------------------------------------------------------------------------|----------------------------------------------------------------------------------------------------------------------------------------|------------------------------------------------------------------------------------------------------------------------------------------------------------------------------|
| Gortaire A., Esteban<br>Licenciado en Ciencias Biológicas<br>Pontificia Universidad Católica del Ecuador<br>Ecuador          | Gortazar, Christian<br>Professor - Animal Health<br>Universidad de Castilla - La Mancha<br>Spain                                       | Gossa, Mesfin Wondafrash<br>Postdoctoral Research Fellow - Entomology<br>University of Pretoria<br>South Africa                                                              |
| Gossieaux, Philippine<br>PhD student in Ecology<br>Université de Sherbrooke<br>Canada                                        | Goswami, Hit Kishore<br>Retired Professor of Human Genetics<br>Barkatullah University, Bhopal (RETIRED-Not affiliated)<br>NOW<br>India | Got, Jean-Baptiste<br>PhD student - Hydrology<br>Université catholique de Louvain<br>Belgium                                                                                 |
| Götmark, Elin<br>Associate Professor in Mathematics<br>Chalmers University of Technology<br>Sweden                           | Götmark, Frank<br>Professor in Ecology<br>University of Gothenburg<br>Sweden                                                           | Gottfried, Kurt *<br>Professor Physics Emeritus<br>Cornell University<br>United States of America (the)                                                                      |
| Gottsberger, Brigitte<br>phD, Zoology<br>University of Vienna<br>Austria                                                     | Gotz, Matt<br>Herpetology<br>United Kingdom of Great Britain and Northern Ireland<br>(the)                                             | GOUBET, Isabelle<br>Associate Professor in Biochemistry<br>La Rochelle University<br>France                                                                                  |
| Goudarzi, Forough<br>PhD student of Biodiversity<br>Isfahan University of Technology<br>Iran (Islamic Republic of)           | Goudarzi, Mohammad<br>Cell biologist<br>Institute of cell biology<br>Germany                                                           | Goudégnon, Eude O. A.<br>PhD student, Natural Resources Management<br>Laboratory of Applied Ecology, Faculty of Agronomic<br>Sciences (University of Abomey-Calavi)<br>Benin |
| Gough, Rachel<br>Researcher in Biology<br>Bangor University<br>United Kingdom of Great Britain and Northern Ireland<br>(the) | Gould, Kevin<br>Professor in Plant Biology<br>Victoria University of Wellington<br>New Zealand                                         | Gould, Lisa Lofland<br>Plant Ecologist (retired)<br>Rhode Island Natural History Survey<br>United States of America (the)                                                    |
| Gould, Matthew<br>Ph.D. Candidate<br>New Mexico State University<br>United States of America (the)                           | Gould, Sven<br>Assistant Professor for Evolutionary Cell Biology<br>HHU Dusseldorf<br>Germany                                          | Gould, Timothy<br>Science Outreach Program Associate<br>Penn State<br>United States of America (the)                                                                         |
| Goulson, Dave<br>Professor of Biology<br>Sussex university<br>United Kingdom of Great Britain and Northern Ireland<br>(the)  | Gour, Barbara<br>Organic Chemist<br>Retired<br>Canada                                                                                  | Gourlay, Philippe<br>DVM, PhD<br>Wildlife Health Centre - Oniris Nantes<br>France                                                                                            |
| Gourlez de La Motte, Louis<br>Phd student<br>University of Liège<br>Belgium                                                  | Gous, Petrus<br>Ophthalmologist<br>Pretoria Eye Institute<br>South Africa                                                              | gousset, aurelie<br>MCF<br>UCA<br>France                                                                                                                                     |

|                                                                                                                                     |                                                                                                                                                                              |                                                                                                                         |
|-------------------------------------------------------------------------------------------------------------------------------------|------------------------------------------------------------------------------------------------------------------------------------------------------------------------------|-------------------------------------------------------------------------------------------------------------------------|
| Goutte-Gattat, Damien<br>Postdoctoral research assistant / Life Sciences<br>CNRS UMR 5095<br>France                                 | Gouveia, Ana<br>Ecology<br>Chinese Academy of Sciences XTBG<br>China                                                                                                         | Gouveia, Sidney<br>Professor / Ecology<br>Federal University of Sergipe<br>Brazil                                       |
| Gouwakinnou, Nounagnon Gerard<br>Assistant Professor, Conservation Biologist<br>Faculty of Agronomy, University of Parakou<br>Benin | Gouyon, Pierre-Henri<br>Professor<br>Muséum National d'Histoire Naturelle de Paris<br>France                                                                                 | Govers, Laura<br>postdoctoral researcher in marine conservation ecology<br>University of Groningen<br>Netherlands (the) |
| Gowan, Evan<br>Post-doctoral Researcher, Paleo-Climate Science<br>Alfred Wegener Institute<br>Germany                               | Gowrappan, Muthusankar<br>Researcher - Earth Sciences<br>French Institute of Pondicherry<br>India                                                                            | Goyer, Aymeric<br>Associate Professor<br>Oregon State University<br>United States of America (the)                      |
| Goymann, Wolfgang<br>Professor for Behavioral Biology<br>Max Planck Institute for Ornithology<br>Germany                            | Goyos Pieroni, Laís<br>PhD student/Science Teaching<br>Universidade Estadual Paulista - UNESP<br>Brazil                                                                      | Graae, Bente Jessen<br>Professor in Plant Ecology<br>NTNU<br>Norway                                                     |
| Graber, Marianne<br>Professor in Biochemistry<br>University of La Rochelle<br>France                                                | Gräbin, Diogo<br>Biólogo Pesquisador Bolsista<br>Instituto de Desenvolvimento Sustentável Mamirauá<br>Brazil                                                                 | Grabowski, Marek<br>Research Scientist<br>University of Virginia<br>United States of America (the)                      |
| Graça, Manuel A.S.<br>Professor<br>University of Coimbra<br>Portugal                                                                | Graça Scheiffer, Rafaela<br>MSc Holistic Science<br>Schumacher College<br>Brazil                                                                                             | Graf, Nadin<br>PhD student / Environmental Sciences<br>University of Koblenz-Landau<br>Germany                          |
| Graf, Roland<br>Prof. Wildlife Management<br>ZHAW<br>Switzerland                                                                    | Grafius, Darren<br>Postdoctoral Research Associate in Environmental<br>Geography<br>University of Sheffield<br>United Kingdom of Great Britain and Northern Ireland<br>(the) | Graham, Caroline<br>United States of America (the)                                                                      |
| Graham, Hamish<br>Medicine<br>University of Melbourne<br>Australia                                                                  | Graham, Linda<br>Professor of Botany<br>University of Wisconsin-Madison<br>United States of America (the)                                                                    | Graham, Margaret<br>Director, Honors Program<br>Union College<br>United States of America (the)                         |
| Graham, Shirley<br>Professor Emerita in Biological Sciences<br>Missouri Botanical Garden<br>United States of America (the)          | Graham, Steve<br>Professor of International Child Health<br>University of Melbourne<br>Australia                                                                             | Graham, Stuart<br>PhD student in Biology<br>University of Washington<br>United States of America (the)                  |

|                                                                                                                                                                     |                                                                                                                                                                                                |                                                                                                                                     |
|---------------------------------------------------------------------------------------------------------------------------------------------------------------------|------------------------------------------------------------------------------------------------------------------------------------------------------------------------------------------------|-------------------------------------------------------------------------------------------------------------------------------------|
| Graham-Jones, Jasper<br>Associate Professor in Mechanical & Marine Engineering<br>Plymouth University<br>United Kingdom of Great Britain and Northern Ireland (the) | Grams, Thorsten<br>Professor<br>Technical University of Munich<br>Germany                                                                                                                      | Granado, Carlos<br>Full professor Ecology<br>Universidad de Sevilla<br>Spain                                                        |
| Granados, Alys<br>Ecology<br>Canada                                                                                                                                 | Granados, Ignacio<br>Limnologist<br>Research, Monitoring & Evaluation Center - Sierra de Guadarrama National Park<br>Spain                                                                     | Granato, Elisa<br>PhD Student, Ecology & Evolution<br>Institute of Plant and Microbial Biology, University of Zurich<br>Switzerland |
| Granda, Elena<br>Postdoctoral Researcher/Ecology<br>Instituto Pirenaico de Ecología IPE-CSIC<br>Spain                                                               | Grande, Juan Manuel<br>Researcher<br>CONICET<br>Argentina                                                                                                                                      | Grande, Matheus<br>Biology student<br>Universidade Federal do Paraná<br>Brazil                                                      |
| Grande, Terry<br>Professor<br>Loyola University Chicago<br>United States of America (the)                                                                           | Grande Allende, José Ramón<br>Professor, Systematic Botany and Ecology<br>Herbario MERF, Facultad de Farmacia y Bioanálisis,<br>Universidad de Los Andes<br>Venezuela (Bolivarian Republic of) | Grandin, Aurore<br>Student in cognitive sciences<br>Ecole Normale Supérieure<br>France                                              |
| Grandisoli, Edson<br>Consultant on Education for sustainable development<br>University of Sao Paulo<br>Brazil                                                       | grandjean, frederic *<br>professor<br>Poitiers university<br>France                                                                                                                            | Grané, Aurea<br>Associate Professor (Statistics Department)<br>Universidad Carlos III de Madrid<br>Spain                            |
| Granjon, Laurent<br>Research Scientist<br>Institut de Recherche pour le Développement (IRD)<br>France                                                               | Granouillac, Bruno<br>IT<br>IRD<br>France                                                                                                                                                      | Grant, Bruce W<br>Professor of Environmental Science<br>Widener University<br>United States of America (the)                        |
| Grantham, Hedley<br>Director, Conservation Planning<br>Wildlife Conservation Society<br>Australia                                                                   | Gras, Michaël<br>Fisheries Stock Assessment Scientist<br>Directorate of Natural Resources<br>United Kingdom of Great Britain and Northern Ireland (the)                                        | Grass, Ingo<br>Postdoctoral researcher in Ecology<br>University of Goettingen<br>Germany                                            |
| Grasset, Charlotte<br>Sweden                                                                                                                                        | Grasso, Donato A.<br>Professor of Zoology and of Behavioural Ecology & Sociobiology<br>Department of Chemistry, Life Sciences and Environmental Sustainability - University of Parma<br>Italy  | Graves, Alisha<br>Population and Family Planning<br>University of California, Berkeley<br>United States of America (the)            |

|                                                                                                                                                                                                                                  |                                                                                                                                                           |                                                                                                                                                |
|----------------------------------------------------------------------------------------------------------------------------------------------------------------------------------------------------------------------------------|-----------------------------------------------------------------------------------------------------------------------------------------------------------|------------------------------------------------------------------------------------------------------------------------------------------------|
| Graves, Julie<br>Adjunct Associate Professor of Management, Policy, and<br>Community Health and Physician, Family Medicine and<br>Public Health<br>University of Texas School of Public Health<br>United States of America (the) | Graves, William<br>Senior Biological Scientist<br>University of Florida<br>United States of America (the)                                                 | Grävingsholt, Jörn<br>German Development Institute<br>Germany                                                                                  |
| Gray, Alan<br>Plant Ecologist<br>The Centre for Ecology and Hydrology<br>United Kingdom of Great Britain and Northern Ireland<br>(the)                                                                                           | Gray, Donald<br>Reader in Science and Sustainability Education<br>University of Aberdeen<br>United Kingdom of Great Britain and Northern Ireland<br>(the) | Gray, Joe<br>PhD Candidate in Ecology<br>Royal Holloway, University of London<br>United Kingdom of Great Britain and Northern Ireland<br>(the) |
| Gray, Mary<br>Professor of mathematics and statistics<br>American University<br>United States of America (the)                                                                                                                   | Gray, Nia<br>PhD Student<br>United Kingdom of Great Britain and Northern Ireland<br>(the)                                                                 | Gray, Thomas<br>Director of Science<br>Wildlife Alliance<br>Cambodia                                                                           |
| Gray, Tracey<br>Marine Biologist<br>Deakin University<br>Australia                                                                                                                                                               | Grazziotin, Felipe Gobbi<br>Evolutionary Biologist<br>Instituto Butantan<br>Brazil                                                                        | Grecian, James<br>Research Fellow, Marine Ecology<br>University of St Andrews<br>United Kingdom of Great Britain and Northern Ireland<br>(the) |
| Green, Andy J.<br>Professor of Ecology<br>Estación Biológica de Doñana, Spanish Council for<br>Science CSIC<br>Spain                                                                                                             | Green, Franklin Bailey<br>Research Professor<br>Wake Forest University<br>United States of America (the)                                                  | Green, Jemma<br>MSc Student, Environmental Studies<br>University of Victoria<br>Canada                                                         |
| Green, Jo<br>Botanist/Ecologist<br>Northern NSW<br>Australia                                                                                                                                                                     | Green, Kelsey<br>MSc Student in Conservation and Wildlife Trade<br>University of Kent<br>United Kingdom of Great Britain and Northern Ireland<br>(the)    | Green, Leon<br>PhD candidate<br>Department of Environmental and Biological Sciences,<br>University of Gothenburg<br>Sweden                     |
| Green, Tom L<br>Ecological Economist and Associate Professor<br>Facultad de Ciencias Naturales y Matemáticas,<br>Universidad del Rosario<br>Colombia                                                                             | Greenberg, Dan<br>PhD Candidate - Biology<br>Simon Fraser University<br>Canada                                                                            | Greene, Charles<br>Professor<br>Cornell University<br>United States of America (the)                                                           |
| Greene, Harry<br>Professor Emeritus of Ecology and Evolutionary Biology<br>Cornell University<br>United States of America (the)                                                                                                  | Greene, Kshanti<br>Computer Science<br>Southern Maine Community College<br>United States of America (the)                                                 | Greengard, Paul<br>Professor, Nobel Laureate, 2000, in neuroscience<br>The Rockefeller University<br>United States of America (the)            |

|                                                                                                                                                  |                                                                                                                                                                                                 |                                                                                                                                                       |
|--------------------------------------------------------------------------------------------------------------------------------------------------|-------------------------------------------------------------------------------------------------------------------------------------------------------------------------------------------------|-------------------------------------------------------------------------------------------------------------------------------------------------------|
| Greenhagen, Andrew<br>Geologist<br>United States of America (the)                                                                                | Greenham, Kyla<br>Curator of Conservation & Environment<br>Toronto Zoo<br>Canada                                                                                                                | Greenspan, Evan<br>Graduate Student - Forestry<br>Southern Illinois University Carbondale<br>United States of America (the)                           |
| Greenspan, Itay<br>Lecturer<br>Hebrew University of Jerusalem<br>Israel                                                                          | Greenspan, Sasha<br>United States of America (the)                                                                                                                                              | Greenville, Aaron<br>Post-doctoral Research Associate<br>University of Sydney<br>Australia                                                            |
| Greenwald, Noah<br>Endangered Species Director<br>Center for Biological Diversity<br>United States of America (the)                              | Greenwood, Peter<br>Technology Transfer Fellow (Printed Photovoltaics) -<br>Materials Science<br>SPECIFIC - Swansea University<br>United Kingdom of Great Britain and Northern Ireland<br>(the) | Gregory, Nichar<br>Vector biologist and disease ecologist<br>Imperial College London<br>United Kingdom of Great Britain and Northern Ireland<br>(the) |
| Gregr, Edward<br>Adjunct Professor, Systems Ecology<br>Institute for Resources, Environment, and Sustainability<br>Canada                        | Greidanus, Harm<br>Scientific project officer<br>European Commission - Joint Research Centre<br>Italy                                                                                           | Greig, Carolyn<br>Research Assistant<br>Swansea Univerasity<br>United Kingdom of Great Britain and Northern Ireland<br>(the)                          |
| Greķe, Kristine<br>MSc in Biology<br>Latvia                                                                                                      | Grellier, S raphine<br>Assistant professor<br>University of Franois Rabelais of Tours, UMR CITERES<br>CNRS<br>France                                                                           | Gr millet, David<br>Marine ecologist<br>National Center for Scientific Research (CNRS)<br>France                                                      |
| Gresham, Amy<br>MSc Conservation & Biodiversity student<br>University of Exeter<br>United Kingdom of Great Britain and Northern Ireland<br>(the) | Greshon, Stephanie<br>Senior Lecturer in Conservation Biology<br>Bath Spa University<br>United Kingdom of Great Britain and Northern Ireland<br>(the)                                           | Grether, Gregory F.<br>Professor of Ecology and Evolutionary Biology<br>University of California Los Angeles<br>United States of America (the)        |
| Greuter, Werner<br>Professor emeritus, Botany<br>Botan. Garte & Botaan. Museum, Berlin-Dahlem<br>Germany                                         | Greve, Michelle<br>Senior Lecturer<br>University of Pretoria<br>South Africa                                                                                                                    | Grewe, Henny-C.<br>Nature Conservation<br>Hochschule Anhalt<br>Germany                                                                                |
| Grey, Penelope<br>Ecological Restoration Consultant<br>South Africa                                                                              | Grez, Audrey A.<br>Professor/Ecology<br>Universidad de Chile<br>Chile                                                                                                                           | Gribel, Rog rio<br>Senior Researcher/Forest Ecology and Genetics<br>INPA (National Institute for Amazonian Research)<br>Brazil                        |



|                                                                                                                                     |                                                                                                                                                        |                                                                                                                                                |
|-------------------------------------------------------------------------------------------------------------------------------------|--------------------------------------------------------------------------------------------------------------------------------------------------------|------------------------------------------------------------------------------------------------------------------------------------------------|
| Griebler, Christian<br>Senior Scientist in Aquatic Ecology<br>Helmholtz Center Munich - Institute of Groundwater Ecology<br>Germany | Grieco, Elisa<br>Researcher<br>EuroMediterranean Center on Climate Change<br>Italy                                                                     | Grier, Jennifer<br>Assistant Professor of Biology<br>Regis University<br>United States of America (the)                                        |
| Griffen, Blaine<br>Associate Professor<br>Brigham Young University<br>United States of America (the)                                | Griffin, Larry<br>Principal Research Officer<br>Wildfowl & Wetlands Trust<br>United Kingdom of Great Britain and Northern Ireland (the)                | Griffin, Megan<br>Rural Sociology MS student<br>Penn State University<br>United States of America (the)                                        |
| Griffin, Melissa<br>PhD Candidate<br>Deakin University<br>Australia                                                                 | Griffin, William<br>BSc Mechanical Design and Manufacture<br>University of Plymouth<br>United Kingdom of Great Britain and Northern Ireland (the)      | Griffioen, Maaik<br>Phd student<br>Belgium                                                                                                     |
| Griffith, Daniel M.<br>Ecologist<br>Universidad Técnica Particular de Loja<br>Ecuador                                               | Griffith, Gary<br>Research Scientist<br>Norwegian Polar Institute<br>Norway                                                                            | Griffiths, Huw<br>Marine Biologist<br>British Antarctic Survey<br>United Kingdom of Great Britain and Northern Ireland (the)                   |
| Griffiths, Jonathan<br>Research Scientist, Plant biologist<br>Agriculture and Agri-food Canada<br>Canada                            | Griffiths, Marylka<br>Evolutionary Biology<br>United Kingdom of Great Britain and Northern Ireland (the)                                               | Griffiths, Richard<br>Program Director<br>Island Conservation<br>New Zealand                                                                   |
| Griffiths-Ward, Megan<br>Plant Ecologist<br>Kent State University<br>United States of America (the)                                 | Grilliot, Amy<br>Biology and Environmental Science<br>Troy University<br>United States of America (the)                                                | Grinde, Alexis<br>Wildlife Ecologist<br>Natural Resources Research Institute, University of Minnesota Duluth<br>United States of America (the) |
| Gripp, Anderson<br>PhD student in Ecology<br>Universidade Federal do Rio de Janeiro<br>Brazil                                       | Gripp, Anne<br>Professor of Biological Sciences<br>Arkansas State University<br>United States of America (the)                                         | Gripp, Richard *<br>Professor of Environmental Biology<br>Arkansas State University<br>United States of America (the)                          |
| Grishchenko, Mikhail<br>PhD Candidate<br>Wageningen University<br>Netherlands (the)                                                 | Grist, Hannah<br>Marine Ecological Researcher<br>Scottish Association for Marine Science<br>United Kingdom of Great Britain and Northern Ireland (the) | Gritschacher, Simon<br>PhD Candidate, Mathematics<br>University of Oxford<br>United Kingdom of Great Britain and Northern Ireland (the)        |

|                                                                                                                                |                                                                                                                                                                    |                                                                                                                                                                                  |
|--------------------------------------------------------------------------------------------------------------------------------|--------------------------------------------------------------------------------------------------------------------------------------------------------------------|----------------------------------------------------------------------------------------------------------------------------------------------------------------------------------|
| Grobler, Adriaan<br>PhD candidate, Plant Ecology<br>Nelson Mandela University<br>South Africa                                  | Grobler, Jan<br>Polymer Chemist<br>South Africa                                                                                                                    | Groeblly, Thomas<br>Ethnicist<br>University on applied science of nordwestern Switzerland<br>Switzerland                                                                         |
| Groen, Kevin<br>PhD candidate Molecular Ecology<br>Leiden University: Institute of Environmental Sciences<br>Netherlands (the) | Groen, Marvin<br>Ecology student<br>Leiden University, Wageningen University<br>Netherlands (the)                                                                  | Groenendijk, Jessica<br>Biology / Tropical Ecology<br>San Diego Zoo Global Peru<br>Peru                                                                                          |
| Groenendijk, Peter<br>Professor Biology<br>State University of Campinas<br>Brazil                                              | Groenteman, Ronny<br>Ecologist, weed biocontrol<br>Manaaki Whenua Landcare Research<br>New Zealand                                                                 | Grogan, Paul<br>Professor of Terrestrial Ecosystem Ecology<br>Queen's University<br>Canada                                                                                       |
| Groisser, David<br>Associate Professor of Mathematics<br>University of Florida<br>United States of America (the)               | Grol, Monique<br>Project Manager - citizen science coral reef monitoring<br>and education<br>Queensland Brain Institute, The University of Queensland<br>Australia | grombone-guaratini, maria<br>Researcher<br>Instituto de botanica<br>Brazil                                                                                                       |
| Grondin, Alexandre<br>Chargé de Recherche<br>Institut de Recherche pour le Développement (IRD)<br>France                       | Groom, Martha<br>Professor of Biodiversity Conservation<br>University of Washington Bothell and University of<br>Washington<br>United States of America (the)      | Groom, Rachel<br>Marine Threatened Species Scientist<br>Northern Territory Government<br>Australia                                                                               |
| Grosbois, Guillaume<br>Postdoctoral researcher aquatic sciences<br>Uqac<br>Canada                                              | Grosiak, Marta<br>Biology PhD<br>Jagiellonian University<br>Poland                                                                                                 | Gross, Collin<br>Graduate student, Ecology and Evolution<br>University of California, Davis<br>United States of America (the)                                                    |
| Gross, Cornelius<br>Group Leader<br>EMBL<br>Italy                                                                              | Gross, Dorit<br>Wageningen University<br>Netherlands (the)                                                                                                         | Gross, Elisabeth M.<br>Professor, Plant ecophysiology and ecotoxicology<br>Interdisciplinary Laboratory for Continental Environments<br>(LIEC), Université de Lorraine<br>France |
| Groß, Lisa<br>Political Scientist<br>German Development Institute, Bonn<br>Germany                                             | Gross, Nicolas<br>Researcher in Ecology<br>INRA<br>France                                                                                                          | Grossart, Hans-Peter<br>Senior Scientist, Aquatic Ecologist, Microbial Ecologist<br>Leibniz Institute of Freshwater Ecology and Inland<br>Fisheries (IGB)<br>Germany             |

|                                                                                                                                                  |                                                                                                                                 |                                                                                                                                             |
|--------------------------------------------------------------------------------------------------------------------------------------------------|---------------------------------------------------------------------------------------------------------------------------------|---------------------------------------------------------------------------------------------------------------------------------------------|
| Grosse, Guido<br>Professor, Permafrost in the Earth System<br>Alfred Wegener Institute Helmholtz Centre for Polar and Marine Research<br>Germany | Grosse-Puppendahl, Tobias<br>Germany                                                                                            | Große-Wilde, Ewald<br>Biologist<br>MPI for Chemical Ecology<br>Germany                                                                      |
| Grossman, Gary<br>Professor, Animal Ecology<br>University of Georgia<br>United States of America (the)                                           | Großmann, Martina<br>Master Student in Evolution, Ecology and Systematics<br>LMU Munich<br>Germany                              | Grossmann, Nárjara<br>Wildlife Veterinarian<br>Brazil                                                                                       |
| Grosso-Silva, José<br>Biologist, Entomology Curator<br>Museu de História Natural e da Ciência, Universidade do Porto<br>Portugal                 | Grove, Simon<br>Zoology Curator<br>Tasmanian Museum & Art Gallery<br>Australia                                                  | Grover, Corrinne<br>Evolutionary Genomicist<br>Iowa State University<br>United States of America (the)                                      |
| Groves, Colin<br>Emeritus Professor of Biological Anthropology<br>Australian National University<br>Australia                                    | Gruber, Josephine<br>Biology and Environmental Science Student Researcher<br>Regis University<br>United States of America (the) | Gruber, Monica<br>Research Fellow<br>Victoria University of Wellington<br>New Zealand                                                       |
| Grubisic, Maja<br>PhD<br>Free University Berlin<br>Germany                                                                                       | Gruetzmacher, Kim<br>PhD candidate<br>Free University of Berlin<br>Germany                                                      | Grunau, Christoph<br>Professor (Biologie, Epigenetics)<br>University of Perpignan Via Domitiana<br>France                                   |
| Grunauer, Michelle<br>Dean of the School of Medicine/Critical Care/MD, PhD.<br>Universidad San Francisco de Quito<br>Ecuador                     | Grundy, Darryl<br>CEO, UQ Health Care, MSc Clin Pharm<br>University of Queensland<br>Australia                                  | Gruner, Daniel<br>Associate Professor of Entomology<br>University of Maryland<br>United States of America (the)                             |
| Grüning, Björn<br>Bioinformatics<br>Uni-Freiburg<br>Germany                                                                                      | Grunwald, Niklaus<br>Courtesy Professor<br>Oregon State University<br>United States of America (the)                            | Grunwald, Theresa<br>PhD Student<br>GFZ German Research Centre for Geo Science<br>Germany                                                   |
| Grupe, Benjamin<br>Postdoctoral Fellow, Marine Ecology<br>Fisheries and Oceans Canada<br>Canada                                                  | Grutter, Alexandra<br>Marine Biologist<br>The University of Queensland<br>Australia                                             | Gryseels, Sophie<br>Postdoc in Ecology and Evolutionary Biology<br>University of Arizona<br>United States of America (the)                  |
| Gsell, Alena<br>postdoc<br>Netherlands Institute of Ecology<br>Netherlands (the)                                                                 | Guadagnin, Demetrio Luis<br>Professor<br>Universidade Federal do Rio Grande do Sul<br>Brazil                                    | Guadarrama Olivera, María de los Ángeles<br>Teacher and researcher and taxonomy<br>Universidad Juárez Autónoma de Tabasco, México<br>Mexico |

|                                                                                                                                                             |                                                                                                                                                                                                         |                                                                                                                                            |
|-------------------------------------------------------------------------------------------------------------------------------------------------------------|---------------------------------------------------------------------------------------------------------------------------------------------------------------------------------------------------------|--------------------------------------------------------------------------------------------------------------------------------------------|
| Guallart, Javier<br>Ph.D. Marine Biologist<br>Freelance researcher, University of Valencia<br>Spain                                                         | Guareschi, Simone<br>Freshwater ecologist<br>Italy                                                                                                                                                      | Guarino, Riccardo<br>Assistant Professor/Applied and Environmental Botany<br>University of Palermo<br>Italy                                |
| GUASTI, MARIA TERESA<br>PROFESSOR<br>UNIVERSITY OF MILANO BICOCCA<br>Italy                                                                                  | Guayasamin, Juan<br>Professor, Biological Sciences<br>Universidad San Francisco de Quito<br>Ecuador                                                                                                     | Guazzaroni, María Eugenia<br>Assistant Professor<br>FFCLRP-University of Sao Paulo<br>Brazil                                               |
| Guazzo, Regina<br>Biological Oceanography<br>Scripps Institution of Oceanography<br>United States of America (the)                                          | Gudge, Sallyann<br>Marine Ecologist/Marine Park Manager<br>Marine Parks, NSW Department Primary industries<br>Australia                                                                                 | Guðlaugsdóttir, Hera<br>PhD student<br>Institute of Earth Sciences, University of Iceland<br>Iceland                                       |
| Guedes, Thaís<br>Postdoc Researcher<br>Federal University of São Paulo<br>Brazil                                                                            | Guegan, Jean-Francois<br>Research professor in ecology and evolution of infectious diseases<br>French Institute for Research on Sustainable Development (IRD, Department Health and Societies<br>France | Guêné-Nanchen, Mélina<br>PhD Candidate<br>Université Laval<br>Canada                                                                       |
| Guenther, Genevieve<br>Lecturer, Literary Studies<br>The New School<br>United States of America (the)                                                       | Guenther, Mariana<br>Associate Professor/Ecology<br>Universidade de Pernambuco<br>Brazil                                                                                                                | Guéorguiev, Borislav<br>Senior researcher, Entomology<br>National Museum of Natural History, Sofia<br>Bulgaria                             |
| Guerova, Guergana<br>Associate professor in Meteorology<br>Department of Meteorology and Geophysics, Sofia<br>University "St. Kliment Ohridski"<br>Bulgaria | Guerra, Miguel Pedro<br>Professor in the Graduate Program in Plant Genetic Resources<br>Federal University of Santa Catarina<br>Brazil                                                                  | Guerra, Tadeu *<br>Ecology<br>Universidade Federal de Minas Gerais<br>Brazil                                                               |
| Guerra, Vinicius<br>PhD student<br>Maringá State University<br>Brazil                                                                                       | Guerreiro, Gertrudes<br>Economist<br>University of Evora<br>Philippines (the)                                                                                                                           | Guerreiro, Ricardo<br>Genetics and Biogeography<br>CIBIO<br>Portugal                                                                       |
| Guerrero, José<br>PhD in Natural Resources. Full professor<br>Universidad Técnica de Manabí<br>Ecuador                                                      | Guerrero, José *<br>Teacher in Biogeography<br>Universidad de la Republica<br>Uruguay                                                                                                                   | Guerrero, Kelvin<br>Profesor of Biology and Entomologist<br>Universidad Agroferestal Fernando Arturo de Meriño<br>Dominican Republic (the) |
| Guerrero, Pablo<br>Director of PhD in Botany and Assistant Professor<br>Universidad de Concepción<br>Chile                                                  | Guerrero, Roberto J.<br>Professor/Invertebrate Zoology and Evolution<br>Universidad del Magdalena<br>Colombia                                                                                           | Guerrero-Latorre, Laura<br>PostDoc Researcher<br>Universidad de las Americas<br>Ecuador                                                    |

|                                                                                                                                                                               |                                                                                                                                     |                                                                                                                                                                                                                                     |
|-------------------------------------------------------------------------------------------------------------------------------------------------------------------------------|-------------------------------------------------------------------------------------------------------------------------------------|-------------------------------------------------------------------------------------------------------------------------------------------------------------------------------------------------------------------------------------|
| Guerrieri, Rossella<br>Post-doctoral researcher<br>CREAF<br>Spain                                                                                                             | Guerrini, Anita<br>History of science, historical ecology<br>Oregon State University<br>United States of America (the)              | Guerta, Rafael Soave<br>PhD Candidate/Applied Ecology-Zoology<br>Federal University of Pará<br>Brazil                                                                                                                               |
| Guéry, Lorelei<br>Post-doc<br>CEFE - CNRS - UMR 5175<br>France                                                                                                                | Guest, David<br>Professor of Plant Pathology<br>The University of Sydney<br>Australia                                               | Guétat-Bernard, Hélène *<br>sociology<br>UMIFRE French Institut of Pondicherry<br>France                                                                                                                                            |
| Gugerli, Felix<br>Senior Scientist<br>WSL Swiss Federal Research Institute<br>Switzerland                                                                                     | Guggenbuhl, Chantal<br>Scientific Collaborator in Statistics / Biologist<br>Federal Office of Statistics Switzerland<br>Switzerland | Guggisberg, Alessia<br>Senior Assistant and Herbarium Curator<br>ETH Zurich<br>Switzerland                                                                                                                                          |
| Guha, Kalyan<br>B.Tech.<br>Indian Institute of Technology, Kharagpur<br>India                                                                                                 | Guiden, Peter<br>United States of America (the)                                                                                     | Guijarro, Luis<br>Mathematics<br>Universidad Autónoma de Madrid<br>Spain                                                                                                                                                            |
| Guilhaumon, François<br>Research scientist<br>Institut de Recherche pour le Développement (IRD)<br>France                                                                     | Guilhermino, Lúcia<br>Full Professor<br>ICBAS & CIIMAR, University of Porto<br>Portugal                                             | Guilhot, Robin<br>PhD student<br>INRA<br>France                                                                                                                                                                                     |
| GUILLEBAUD, John<br>Emeritus Professor of Family Planning and Reproductive Health<br>University College, London<br>United Kingdom of Great Britain and Northern Ireland (the) | Guillén, Diego<br>Biologist<br>Universidad del Valle<br>Colombia                                                                    | Guillon, Jean-Michel<br>Researcher<br>Université Paris Sud<br>France                                                                                                                                                                |
| Guillozet, Kathleen<br>Forest and social science<br>Bonneville Environmental Foundation<br>United States of America (the)                                                     | Guimaraes, Julio<br>Maths and Data Science<br>Universidad Nacional de Asuncion<br>Paraguay                                          | Guimarães, Gilson Burigo<br>Geologist, Doctor in Igneous Petrology; responsible for the disciplines of Mineralogy, General Geology, and Natural Resources and Society<br>State University of Ponta Grossa, Paraná, Brazil<br>Brazil |
| Guimarães, Larissa<br>PhD studente<br>Universidade Federal do Ceará<br>Brazil                                                                                                 | Guimarães Araujo, Gabriela<br>Doctoral student<br>National Museum / UFRJ<br>Brazil                                                  | Guimaraes Sales, Naiara<br>Brazil                                                                                                                                                                                                   |
| Guimarães Thielemann, Maria Elizabeth<br>Graduate Researcher<br>UNICAMP<br>Brazil                                                                                             | Guimaraes Bermejo, Mayrene<br>PhD student<br>Universidad Nacional Autónoma de México<br>Mexico                                      | Guisan, Antoine<br>Full Professor in Ecology<br>University of Lausanne<br>Switzerland                                                                                                                                               |

|                                                                                                                                   |                                                                                                                            |                                                                                                                                                                                                                   |
|-----------------------------------------------------------------------------------------------------------------------------------|----------------------------------------------------------------------------------------------------------------------------|-------------------------------------------------------------------------------------------------------------------------------------------------------------------------------------------------------------------|
| Guitet, Stéphane<br>Tropical forest ecology (PhD)<br>France                                                                       | Gutián, Pablo<br>Universidade de Santiago de Compostela<br>Spain                                                           | Guivarch, Celine<br>Senior researcher, environmental and resources<br>economics<br>CIRED, Ecole des Ponts ParisTech<br>France                                                                                     |
| Guldemon, Robert<br>South Africa                                                                                                  | Gull, Emanuel<br>Assistant Professor<br>University of Michigan<br>United States of America (the)                           | Gullan, Penelope<br>Emeritus Professor<br>The Australian National University<br>Australia                                                                                                                         |
| Gundale, Michael<br>Associate Professor<br>Swedish University of Agricultural Sciences<br>Sweden                                  | Gunnarson, Sydney<br>MSc Geology<br>University of Iceland<br>Iceland                                                       | Gunnarsson, Bengt<br>Professor Environmental Science<br>University of Gothenburg<br>Sweden                                                                                                                        |
| Gunnarsson, Lina<br>Ecotoxicologist<br>University of Exeter<br>United Kingdom of Great Britain and Northern Ireland<br>(the)      | Gunsch, Danielle<br>M.Sc. Candidate and Research Assistant / Wetland Biology<br>University of Windsor<br>Canada            | Gunson, Kari<br>Road Ecologist<br>Eco-Kare International<br>Canada                                                                                                                                                |
| Gunzburg, Daniel<br>Senior Environmental Officer<br>Department of Environmnet and Heritage Protection,<br>Queensland<br>Australia | Guo, Lian<br>Organismic and Evolutionary Biology<br>University of Massachusetts Amherst<br>United States of America (the)  | Gupta, Vijai Kumar *<br>Senior Research Scientist<br>Department of Chemistry and Biotechnology, ERA Chair<br>of Green Chemistry, School of Science, Tallinn University<br>of Technology, 12618 Tallinn<br>Estonia |
| Gurevitch, Jessica<br>Professor, Ecology<br>Stony Brook University<br>United States of America (the)                              | Gurung, Sabita<br>Research Officer<br>Small Mammals Conservation and Research Foundation<br>Nepal                          | Gusman Ferraz, José Maria<br>Professor / Agroecology<br>Unicamp -State University of Campinas<br>Brazil                                                                                                           |
| Gustafsson, Lena<br>Professor emerita<br>SLU Swedish University of Agricultural Sciences<br>Sweden                                | Gustavsson, Eva<br>Senior lecturer, landscape management<br>University of Gothenburg, Department of Conservation<br>Sweden | Gustin, Jean<br>Assistant Staff Scientist<br>Oregon Health & Science University<br>United States of America (the)                                                                                                 |
| Guta, Dawit<br>Asssitant Professor<br>Addis Ababa University<br>Ethiopia                                                          | Guth, Miriam<br>Forest Science<br>Germany                                                                                  | Gutierrez, Eliecer E.<br>Professor/Evolutionary Biology<br>Universidade Federal de Santa Maria (UFSM)<br>Brazil                                                                                                   |

|                                                                                                                                                  |                                                                                                                                                                        |                                                                                                                          |
|--------------------------------------------------------------------------------------------------------------------------------------------------|------------------------------------------------------------------------------------------------------------------------------------------------------------------------|--------------------------------------------------------------------------------------------------------------------------|
| Gutierrez, Gabriela *                                                                                                                            | Gutierrez, Luis<br>Editor, Mother Pelican Journal (pelicanweb.org)<br>United States of America (the)                                                                   | Gutiérrez, David<br>Senior Lecturer/ Ecology<br>Universidad Rey Juan Carlos<br>Spain                                     |
| Gutiérrez, José María<br>Professor<br>Universidad de Costa Rica<br>Costa Rica                                                                    | Gutiérrez, Yeisson<br>PhD Student<br>University of Münster, Institute of Landscape Ecology<br>Germany                                                                  | Gutiérrez del Arroyo Santiago, Omar<br>PhD Candidate<br>UC Berkeley<br>Puerto Rico                                       |
| Gutiérrez-Cánovas, Cayetano<br>Postdoc fellow, Ecology<br>University of Barcelona<br>Spain                                                       | Gutiérrez-Cárdenas, Paul David Alfonso<br>Assistant professor / Zoologist<br>Facultad de Ciencias Exactas y Naturales, Universidad de<br>Caldas, Manizales<br>Colombia | Gutiérrez-Fonseca, Pablo E.<br>Post Doctoral Researcher / Freshwater Ecology<br>University of Puerto Rico<br>Puerto Rico |
| Guuroh, Reginald Tang<br>Research Scientist<br>CSIR-Forestry Research Institute of Ghana<br>Ghana                                                | Güven, Nihat Emin<br>Turkey                                                                                                                                            | Guy, Travis<br>Ecologist<br>University of Florida<br>United States of America (the)                                      |
| Guy-Haim, Tamar<br>Postdoctoral researcher<br>GEOMAR Helmholtz Centre for Ocean Science Kiel<br>Germany                                          | GUZMAN, Luz Maria<br>Marine Biology<br>My own company of Turism<br>Mexico                                                                                              | Guzman Jacob, Valeria<br>PhD. Biodiversity Ecology<br>Georg-August University Göttingen<br>Germany                       |
| Guzmán Rendón, Garen<br>MSc, PhD student<br>Universidad de Concepción<br>Chile                                                                   | Guzman-Bustamante, Ivan<br>PhD student - Agricultural Sciences<br>University of Hohenheim<br>Germany                                                                   | Guzzo, Marcelo M.<br>Physics<br>UNICAMP<br>Brazil                                                                        |
| Gwinn, Daniel<br>Quantitative Ecologist<br>Biometric Research<br>Australia                                                                       | Gwynn`, Dr dennis<br>rtired professor<br>university of Maryland University College Asian division<br>United States of America (the)                                    | Gxasheka, Masibonge *<br>Lecturer<br>University of Limpopo<br>South Africa                                               |
| H. Sharma, Chithra<br>Ph. D. Student<br>Indian Institute of Science Education and Research<br>Thiruvananthapuram<br>India                        | Haag, Fridolin<br>Environmental & Engineering Management<br>Eawag<br>Switzerland                                                                                       | Haaland, Thomas<br>Norwegian University of Science and Technology<br>Norway                                              |
| Haarloo, Jammille<br>Researcher, Ecology and Natural Resource Management<br>The Centre for Agricultural Research in Suriname (CELOS)<br>Suriname | Haase, Catherine<br>Postdoctoral Researcher<br>Montana State University<br>United States of America (the)                                                              | Haberkorn, Hansy<br>France                                                                                               |

|                                                                                                                                                   |                                                                                                            |                                                                                                                                 |
|---------------------------------------------------------------------------------------------------------------------------------------------------|------------------------------------------------------------------------------------------------------------|---------------------------------------------------------------------------------------------------------------------------------|
| Haberman, Adam<br>Assistant Professor of Biology<br>University of San Diego<br>United States of America (the)                                     | Habibzadeh, Nader<br>Assistant Professor<br>Islamic Azad University, Tabriz<br>Iran (Islamic Republic of)  | Hackett, Jamie<br>Principal Investigator<br>European Molecular Biology Laboratory<br>Italy                                      |
| Hacking, Jennifer<br>Blue Forests Madagascar Programme Manager<br>Blue Ventures<br>Madagascar                                                     | Haddad, Celio<br>Full Professor/Vertebrates<br>Universidade Estadual Paulista<br>Brazil                    | Haddad, Marcelo<br>MSc. Environmental Technology<br>Instituto de Pesquisas Tecnológicas<br>Brazil                               |
| HADDAD, NADIA<br>Professor in contagious diseases, Director of the Joint<br>Research Unit BIPAR<br>Ecole Nationale Vétérinaire d'Alfort<br>France | Hadj-Chikh, Leila<br>Ecology & Evolutionary Biology<br>United States of America (the)                      | Hadjikakou, Michalis<br>Senior Research Associate (Sustainability)<br>University of New South Wales<br>Australia                |
| Hadjioannou, Louis<br>Research Director<br>Enalia Physis Environmental Research Centre<br>Cyprus                                                  | Haeger, Achim<br>Professor of Natural Resources Management<br>School for Field Studies<br>Costa Rica       | Haelters, Jan<br>Marine biologist<br>Royal Belgian Institute of Natural Sciences<br>Belgium                                     |
| Haertl, Fabian<br>Forestry scientist<br>Technical University of Munich<br>Germany                                                                 | Haesler, Barbara<br>United Kingdom of Great Britain and Northern Ireland<br>(the)                          | Haesler, Marcel<br>Biologist<br>University of Bern<br>Switzerland                                                               |
| Häfker, N. Sören<br>PhD student<br>Alfred Wegener Institute Helmholtz Centre for Polar und<br>Marine Research<br>Germany                          | HAFTEK-TERREAU, Zofia<br>PhD-Ingeneer<br>Ecole Normale Supérieure de Lyon<br>France                        | Hagen, Christina<br>Conservation biologist<br>BirdLife South Africa<br>South Africa                                             |
| Haghighi, Hassan<br>Associate Professor, Mathematics<br>K. N. Toosi University of Technology<br>Iran (Islamic Republic of)                        | Hagyo, Andrea<br>Scientific Officer, ecologist<br>Joint Research Centre, European Commission<br>Italy      | Hahn, Thomas<br>Associate Professor Environmental Social Science<br>Stockholm Resilience Centre, Stockholm University<br>Sweden |
| Hahn, Tobias<br>Doctoral Researcher, Chemical Oceanography<br>GEOMAR Helmholtz Centre for Ocean Research Kiel<br>Germany                          | Hahs, Amy<br>Honorary Associate (Urban Ecology)<br>The University of Melbourne<br>Australia                | Haider, Sylvia<br>Assistant Professor in Geobotany<br>Martin Luther University Halle-Wittenberg<br>Germany                      |
| Haines, Dustin<br>Research Associate, Ecology<br>University of Minnesota Duluth<br>United States of America (the)                                 | Hajdu, Eduardo<br>Associate Professor<br>Universidade Federal do Rio de Janeiro - Museu Nacional<br>Brazil | Haji Mohammad Din, Hazimah<br>Master student<br>Yeungnam University, South Korea<br>Brunei Darussalam                           |



|                                                                                                                             |                                                                                                                                        |                                                                                                                                               |
|-----------------------------------------------------------------------------------------------------------------------------|----------------------------------------------------------------------------------------------------------------------------------------|-----------------------------------------------------------------------------------------------------------------------------------------------|
| Hajizadeh, Nelly<br>Biophysics<br>EMBL<br>Germany                                                                           | Hajkova, Petra<br>Research assistant/Zoology<br>Institute of Vertebrate Biology, The Czech Academy of Sciences<br>Czech Republic (the) | Håkansson, Eckart<br>Professor emeritus<br>The University of Western Australia<br>Australia                                                   |
| Halac, Silvana<br>Senior Research<br>CICTERRA (Conicet)<br>Argentina                                                        | Halajian, Ali<br>Senior Researcher<br>University of Limpopo<br>South Africa                                                            | Halbleib, Mary<br>Adult Education for Integrated Pest Management (IPM)<br>Oregon State University<br>United States of America (the)           |
| Halbritter, Aud Helen<br>Postdoctoral Researcher<br>University of Bergen<br>Norway                                          | Hale, Brack<br>Associate Professor of Biology and Environmental Science<br>Franklin University Switzerland<br>Switzerland              | Hales, Simon<br>Research Associate Professor, Public Health<br>University of Otago<br>New Zealand                                             |
| Halfacree, Keith<br>Human Geography<br>Swansea University<br>United Kingdom of Great Britain and Northern Ireland (the)     | Halfhide, Trina<br>Assistant professor<br>the University of the West Indies<br>Trinidad and Tobago                                     | Halford, Andrew<br>Research Scientist - Coral Reefs<br>Australia                                                                              |
| Halford, Stephen<br>Natural History Museum Technician (Retired)<br>Simon Fraser University<br>Canada                        | Hall, Billy<br>Postdoctoral Fellow<br>SESYNC<br>United States of America (the)                                                         | Hall, James D<br>Professor Emeritus of Fisheris<br>Oregon State University<br>United States of America (the)                                  |
| Hall, Nathan<br>Ecologist<br>Environment Agency<br>United Kingdom of Great Britain and Northern Ireland (the)               | Hall, Roberta<br>Biological Anthropology, Professor Emeritus<br>Oregon State University<br>United States of America (the)              | Hall, Steven<br>Assistant Professor of Environmental Biogeochemistry<br>Iowa State University<br>United States of America (the)               |
| Hall, Stuart<br>Restoration Ecologist<br>Stellenbosch University<br>South Africa                                            | Hall, William<br>Australia                                                                                                             | Hallam, Thomas<br>Professor Emeritus Ecology and Evolutionary Biology<br>University of Tennessee, Knoxville<br>United States of America (the) |
| Hall-Bowman, Jenifer<br>Science journal editor<br>Institute of Arctic and Alpine Research<br>United States of America (the) | Haller, Benjamin C.<br>Evolutionary biologist<br>Cornell University<br>United States of America (the)                                  | Hallett, Matt<br>PhD Candidate<br>University of Florida<br>United States of America (the)                                                     |

|                                                                                                                                                                                  |                                                                                                                                                                                            |                                                                                                                                               |
|----------------------------------------------------------------------------------------------------------------------------------------------------------------------------------|--------------------------------------------------------------------------------------------------------------------------------------------------------------------------------------------|-----------------------------------------------------------------------------------------------------------------------------------------------|
| Hallett, Sascha<br>Senior Research Associate, Ichthyoparasitology<br>Oregon State University<br>United States of America (the)                                                   | Halley, John M<br>Professor<br>University of Ioannina<br>Greece                                                                                                                            | hall-spencer, Jason<br>Professor of Marine Biology<br>University of Plymouth<br>United Kingdom of Great Britain and Northern Ireland<br>(the) |
| Halpern, MD, DSc, Georges M<br>Former Distinguished Professor of Medicinal Sciences<br>The Hong Kong Polytechnic University<br>United States of America (the)                    | Halsey, Richard<br>Ecology<br>California Chaparral Institute<br>United States of America (the)                                                                                             | Halun, Sitti Zayda<br>Marine Ecology<br>Mindanao State University in Tawi-Tawi<br>Philippines (the)                                           |
| Hamann, Madeleine<br>PhD Candidate -- Physical Oceanography<br>Scripps Institution of Oceanography<br>United States of America (the)                                             | Hamdaoui, Ahmed<br>Professor in Biology<br>Cadi Ayyad University Faculty of Sciences Semlalia<br>Marrakech<br>Morocco                                                                      | Hameed, Sarah<br>Science Fellow<br>Marine Conservation Institute<br>United States of America (the)                                            |
| Hameister, Inga<br>PhD in Cognitive Science<br>Macquarie University<br>Australia                                                                                                 | Hamel, Sandra<br>Researcher<br>UiT The Arctic University of Norway<br>Norway                                                                                                               | Hamelin, Jérôme<br>Director of Research<br>INRA<br>France                                                                                     |
| Hamer, Rowena<br>Ecologist and PhD Candidate<br>University of Tasmania<br>Australia                                                                                              | Hamid, RGUIBI IDRISSEI *<br>Professor university/ECOLOGY OF CONSERVATION<br>University Mohammed V, Faculty of Sciences,<br>Laboratory "Biodiversité, Ecology and Genome", Rabat<br>Morocco | Hamilton, Ava<br>independent documentary producer/citizen scientist<br>United States of America (the)                                         |
| Hamilton, Dr Martin<br>Research Leader (UKOTs)<br>Royal Botanic Gardens, Kew<br>United Kingdom of Great Britain and Northern Ireland<br>(the)                                    | Hamilton, Grant<br>Senior Lecturer, Ecology<br>Queensland University of Technology (QUT)<br>Australia                                                                                      | Hamilton, Stephen<br>PhD Student (Ecology)<br>University of Alberta<br>Canada                                                                 |
| Hamilton, Terry<br>Scientific Director, Marshall Islands Dose Assessment and<br>Radioecology Program<br>Lawrence Livermore National Laboratory<br>United States of America (the) | Hammel, Barry *<br>Curator<br>Missouri Botanical Garden<br>United States of America (the)                                                                                                  | Hammer, Edith<br>Associate senior lecturer Biology<br>Lund University, Biology<br>Sweden                                                      |
| Hammerton, Zan<br>Marine Ecology<br>Australia                                                                                                                                    | Hammock, Jennifer<br>Biodiversity Informaticist<br>Smithsonian Institution<br>United States of America (the)                                                                               | Hamoud, Aref<br>Marine Biologist, and Field Research Coordinator<br>MSBRA<br>Yemen                                                            |

|                                                                                                                                      |                                                                                                                                              |                                                                                                                             |
|--------------------------------------------------------------------------------------------------------------------------------------|----------------------------------------------------------------------------------------------------------------------------------------------|-----------------------------------------------------------------------------------------------------------------------------|
| Hampe, Arndt<br>Director of Research<br>Institut National de la Recherche Agronomique (INRA)<br>France                               | Hampson, Katie<br>Reader, Ecology<br>University of Glasgow<br>United Kingdom of Great Britain and Northern Ireland (the)                     | Hampton, Shannon<br>Marine Biology<br>South Africa                                                                          |
| Hampton, William John<br>Chief Scientist, Fisheries<br>Pacific Community<br>New Caledonia                                            | Han, Susan<br>Faculty<br>University of Massachusetts<br>United States of America (the)                                                       | Hanazaki, Natalia<br>Professor, Ecology<br>Universidade Federal de Santa Catarina<br>Brazil                                 |
| Hancock, Joana<br>MSc Graduate - PhD Candidate<br>cE3c Faculty of Sciences of Lisbon/ CIBIO Faculty of Sciences of Porto<br>Portugal | Hancock, Laura<br>Graduate Student<br>University of Massachusetts Amherst<br>United States of America (the)                                  | Hancock, Nola<br>Research Fellow<br>Macquarie University<br>Australia                                                       |
| Hancock, Trevor<br>Professor and Senior Scholar<br>School of Public Health and Social Policy, University of Victoria<br>Canada       | Handley, Claire<br>trainee clinical psychologist<br>nwcpp<br>United Kingdom of Great Britain and Northern Ireland (the)                      | Handschuh, Markus<br>PhD student and freelance Ecologist<br>University of Freiburg<br>Germany                               |
| Hanewinkel, Marc<br>Professor<br>University of Freiburg<br>Germany                                                                   | Hanken, James<br>Director, Museum of Comparative Zoology<br>Harvard University<br>United States of America (the)                             | Hanley, Mick<br>Associate Professor<br>University of Plymouth<br>United Kingdom of Great Britain and Northern Ireland (the) |
| Hanna, Liz *<br>President Climate and Health Alliance<br>Australian National University<br>Australia                                 | Hannes, Grobe<br>Geologist/Paleoclimatologist<br>Alfred Wegener Institute, Helmholtz Centre for Polar und Marine Research<br>Germany         | Hanold, Dagmar<br>Plant virologist<br>Adelaide<br>Australia                                                                 |
| Hansel, Troy<br>Conservation Biologist<br>Consultant<br>United States of America (the)                                               | Hansen, Christian<br>Research Associated / Biogeochemistry, Geochemistry, Earth Sciences<br>ICBM / University of Oldenburg<br>Germany        | Hansen, Dennis<br>Research Group Leader, Ecology & Conservation<br>University of Zurich<br>Switzerland                      |
| Hansen, Georg<br>Senior Scientist<br>NILU - Norwegian Institute for Air Research<br>Norway                                           | Hansen, James<br>Director, Climate Science, Awareness and Solutions<br>Columbia University Earth Institute<br>United States of America (the) | Hansen, Jannik<br>Scientific Officer, biology<br>Aarhus University<br>Denmark                                               |

|                                                                                                                                   |                                                                                                                                              |                                                                                                                                 |
|-----------------------------------------------------------------------------------------------------------------------------------|----------------------------------------------------------------------------------------------------------------------------------------------|---------------------------------------------------------------------------------------------------------------------------------|
| Hansen, Marten<br>PhD<br>Sanquin<br>Netherlands (the)                                                                             | Hansen, Matthew<br>Professor<br>University of Maryland<br>United States of America (the)                                                     | Hansen, Simone<br>PhD Candidate - Conservation Ecology & Entomology<br>University of Stellenbosch<br>South Africa               |
| Hanshumaker, William<br>Oregon Sea Grant Chief Scientist<br>Oregon State University<br>United States of America (the)             | Hanske, Jonas<br>Postdoctoral Researcher<br>European Molecular Biology Laboratory (EMBL),<br>Heidelberg<br>Germany                           | Hara, Ana<br>Technical Officer<br>Western Australian Museum<br>Australia                                                        |
| Haran, Julien<br>Dr Entomology<br>Cirad<br>France                                                                                 | Harbor, Jon<br>Professor, Department of Earth, Atmospheric, and<br>Planetary Sciences<br>Purdue University<br>United States of America (the) | Harborne, Alastair<br>Assistant Professor, Marine biology<br>Florida International University<br>United States of America (the) |
| Harcourt, Rob<br>Professor of Marine Ecology<br>Macquarie University<br>Australia                                                 | Harden, Carol<br>Professor emerita/Geography<br>University of Tennessee<br>United States of America (the)                                    | Hardenbol, Alwin<br>Early stage researcher in Forest Ecology<br>University of Eastern Finland<br>Finland                        |
| Hardesty, Britta<br>Ecology<br>Australia                                                                                          | HARDESTY, JOHN<br>ECONOMICS, PH.D<br>RETIRED<br>United States of America (the)                                                               | Hardesty-Moore, Molly<br>Graduate student/Ecology<br>University of California, Santa Barbara<br>United States of America (the)  |
| Harding, Lisa<br>Psychiatrist<br>United States of America (the)                                                                   | Harding, William (Bill)<br>Ecologist / Environmental Law<br>DH Environmental Consulting<br>South Africa                                      | Hardinge, Simone<br>Veterinarian<br>Australia                                                                                   |
| Hardy, Douglas R.<br>Senior Research Fellow<br>University of Massachusetts Amherst<br>United States of America (the)              | Hardy, Mathew<br>PhD Graduand, Conservation Science<br>RMIT University<br>Australia                                                          | Hargis, Jacob<br>Wildlife Research Assistant<br>San Diego Zoo Global<br>United States of America (the)                          |
| hargreaves, sarah<br>Phycology researcher<br>Plymouth University<br>United Kingdom of Great Britain and Northern Ireland<br>(the) | Harkavy, Angela *<br>Journalist<br>Retired<br>Brazil                                                                                         | Harlaß, Jan<br>Climate Researcher<br>GEOMAR Helmholtz Centre for Ocean Research Kiel<br>Germany                                 |
| Harms, Arne<br>Lecturer, Social and Cultural Anthropology<br>University Leipzig<br>Germany                                        | Harms, Kyle<br>Professor of Biological Sciences<br>Louisiana State University<br>United States of America (the)                              | Harmsen, Bart<br>Wildlife Fellow<br>University of Belize-Environmental Research Institute<br>Belize                             |

|                                                                                                                             |                                                                                                                                 |                                                                                                                                |
|-----------------------------------------------------------------------------------------------------------------------------|---------------------------------------------------------------------------------------------------------------------------------|--------------------------------------------------------------------------------------------------------------------------------|
| Harnos, Andrea<br>associate professor, statistics<br>University of Veterinary Medicine Budapest<br>Hungary                  | Harold, Simon<br>Senior Editor<br>Nature Ecology and Evolution<br>United Kingdom of Great Britain and Northern Ireland<br>(the) | HAROUN, Ricardo<br>Prof. Marine Plant Conservation<br>Research Institute ECOAQUA, Univ. Las Palmas de Gran<br>Canaria<br>Spain |
| Harper, Grant<br>Terrestrial Ecology<br>Company Director<br>New Zealand                                                     | Harre, Niki<br>Lecturer in Psychology<br>The University of Auckland<br>New Zealand                                              | Harries, Hugh<br>Coconut Time LIne<br>United Kingdom of Great Britain and Northern Ireland<br>(the)                            |
| Harris, Daniel<br>Lecturer - Coastal and Marine Science<br>The University of Queensland<br>Australia                        | Harris, Emma<br>Lecturer: Nature Conservation<br>University of South Africa<br>South Africa                                     | Harris, Jean<br>Director Oceans. PhD Marine Ecology.<br>Wildlands Conservation Trust<br>South Africa                           |
| Harris, Jenine<br>Associate Professor<br>Brown School, Washington University in St. Louis<br>United States of America (the) | Harris, Lauren<br>PhD Student<br>Berkeley<br>United States of America (the)                                                     | Harris, Maria Inês Nogueira de Camargo<br>CEO<br>Instituto Harris<br>Brazil                                                    |
| Harris, Rebecca<br>Climate Research Fellow<br>Antarctic Climate Ecosystem CRC, University of Tasmania<br>Australia          | Harris, Reid<br>Professor Emeritus<br>James Madison University<br>United States of America (the)                                | Harris, Richard<br>Lecturer<br>Curtin University<br>Australia                                                                  |
| Harrison, Hugo<br>Research Fellow Coral Reef Ecology<br>James Cook University<br>Australia                                  | Harrison, Joshua<br>Ecology and Evolution, PhD candidate<br>University of Nevada, Reno<br>United States of America (the)        | Harrison, Mark E.<br>Co-Director<br>Borneo Nature Foundation<br>Indonesia                                                      |
| Harrison, Peter<br>Ornithologist<br>Apex Expeditions<br>United Kingdom of Great Britain and Northern Ireland<br>(the)       | Harrod, Chris<br>Titular Professor (Aquatic Ecology)<br>Universidad de Antofagasta<br>Chile                                     | Harsem, Siri<br>MSc Biology<br>Norway                                                                                          |
| Hart, Rob<br>Professor Emeritus Zoology & Limnology<br>University of KwaZulu-Natal<br>South Africa                          | Hart, Stephen<br>Professor of Ecology<br>University of California Merced<br>United States of America (the)                      | Hart, Terese<br>Director of Conservation Project<br>Lukuru Wildlife Research Foundation<br>United States of America (the)      |
| Harte, John *<br>Professor of Ecosystem Sciences<br>UC Berkeley<br>United States of America (the)                           | Hartl, Christoph<br>Ecology<br>SniffX<br>Germany                                                                                | Hartley, Stephen<br>Senior Lecturer<br>Victoria University of Wellington<br>New Zealand                                        |

|                                                                                                                                                                               |                                                                                                                                                 |                                                                                                                                                                                    |
|-------------------------------------------------------------------------------------------------------------------------------------------------------------------------------|-------------------------------------------------------------------------------------------------------------------------------------------------|------------------------------------------------------------------------------------------------------------------------------------------------------------------------------------|
| Hartline, Daniel<br>Professor of Neurobiology<br>University of Hawai'i at Manoa<br>United States of America (the)                                                             | Hartline, Frederick<br>VP, Program Developer (Informal Science Education)<br>The Science Mine, Butte, Montana<br>United States of America (the) | Hartline, Peter<br>Current: Development Fellow; Previous: Senior Scientist<br>Current: New England Biolabs; Previous: Schepens Eye<br>Res. Inst.<br>United States of America (the) |
| Hartmann, Hanna<br>Vegetation and Disturbance Ecology<br>University of Bayreuth<br>Germany                                                                                    | Hartmann, Hans J.<br>Senior Associate Professor<br>University of La Rochelle<br>France                                                          | Hartmann, Jonas<br>Predoc Fellow, Cell and Developmental Biology<br>European Molecular Biology Laboratory (EMBL)<br>Germany                                                        |
| Hartmann, Jörg<br>Senior Scientist<br>Alfred Wegener Institute<br>Germany                                                                                                     | Hartmann, Nanna B.<br>Senior Researcher<br>Technical University of Denmark<br>Denmark                                                           | Hartung, Thomas<br>Chair Evidence-based Toxicology<br>Johns Hopkins Bloomberg School of Public Health<br>United States of America (the)                                            |
| Hartvig, Martin<br>Postdoctoral alumni, Theoretical Ecology<br>University of Copenhagen<br>Denmark                                                                            | Hartwell, Leland<br>Professor Education and Sustainability<br>Arizona State University<br>United States of America (the)                        | Härtwich, Hannah<br>Geoecology<br>Netherlands (the)                                                                                                                                |
| Harvey, Ben P.<br>Assistant Professor, Marine Climate Change Ecology<br>Shimoda Marine Research Center, University of Tsukuba<br>Japan                                        | Harvey, Jim<br>Director<br>Moss Landing Marine Laboratories<br>United States of America (the)                                                   | Harvey, William *<br>Emeritus Professor of Biology<br>Earlham College<br>United States of America (the)                                                                            |
| Harwatt, Helen<br>Independent research specialist. Environmental social<br>science/sustainable food systems.<br>United Kingdom of Great Britain and Northern Ireland<br>(the) | Hasenack, Heinrich<br>Geographer<br>Universidade Federal do Rio Grande do Sul<br>Brazil                                                         | Hasid, Iior<br>M.sc student<br>Department of Evolutionary and Environmental Biology,<br>Haifa University<br>Israel                                                                 |
| Hass, Carla<br>Teaching Professor of Biology<br>Penn State<br>United States of America (the)                                                                                  | Hass, Christine<br>Soundscape ecologist<br>Self-employed<br>United States of America (the)                                                      | hassan, asmaa<br>assistant researched<br>NARSS<br>Egypt                                                                                                                            |
| Hassan, Moshira *<br>Marine Ecologist<br>Free University Berlin, Germany<br>Germany                                                                                           | Hassanali, Ahmed<br>Professor (Chemical Ecology)<br>Kenyatta University<br>Kenya                                                                | Hassellöv, Ida-Maja<br>Assoc Prof Maritime Environmental Science<br>Chalmers University of Technology<br>Sweden                                                                    |

|                                                                                                                                          |                                                                                                                                                                     |                                                                                                                                                                                                             |
|------------------------------------------------------------------------------------------------------------------------------------------|---------------------------------------------------------------------------------------------------------------------------------------------------------------------|-------------------------------------------------------------------------------------------------------------------------------------------------------------------------------------------------------------|
| Hasselquist, Niles<br>Researcher<br>Swedish University of Agricultural Sciences (SLU), Umeå<br>Sweden                                    | Hassemer, Gustavo<br>Botanist<br>University of Copenhagen<br>Denmark                                                                                                | Hassenrueck, Christiane<br>Postdoc Marine Microbiology<br>Leibniz Centre for Tropical Marine Research<br>Germany                                                                                            |
| Haßler, Kathrin<br>Germany                                                                                                               | Hassum, Izabella *<br>Medical Veterinary Research<br>Embrapa<br>Brazil                                                                                              | Haswell, Peter<br>Wildlife Biologist / Graduate teaching associate & PhD<br>researcher<br>School of Biological Sciences, Bangor University<br>United Kingdom of Great Britain and Northern Ireland<br>(the) |
| Hatch, Martin<br>Ethnomusicology<br>Cornell University<br>United States of America (the)                                                 | Hatcher, Bruce Gordon<br>Chair in Marine Ecosystem Research<br>Cape Breton University<br>Canada                                                                     | Hatfield, Joanna<br>Physician, Associate professor of obstetrics and<br>gynecology<br>Oregon Health & Sciences University<br>United States of America (the)                                                 |
| Hatfield, Richard<br>Senior Conservation Biologist<br>The Xerces Society for Invertebrate Conservation<br>United States of America (the) | Hatjina, Fani<br>Researcher A', Honeybee behaviour<br>Division of Apiculture, Institute of Animal Science,<br>Hellenic Agricultural Organization;DEMETER;<br>Greece | Hattingh, Adele<br>Aquaculture<br>South Africa                                                                                                                                                              |
| Hattingh, Wesley<br>PhD Candidate in Ecology<br>University of the Witwatersrand<br>South Africa                                          | Hatton, Geoffrey<br>Man. Director ----Turf & Pasture Rersearch Company<br>Hatton Turf Research Pty Ltd.<br>Australia                                                | Haubrich, Kevin<br>PhD student in Structural Biology<br>European Molecular Biology Laboratory (EMBL)<br>Germany                                                                                             |
| Hauck, Judith<br>Marine Biogeochemistry<br>Alfred Wegener Institute, Helmholtz-Centre for Polar and<br>Marine Research<br>Germany        | Haugaasen, Torbjørn<br>Professor in Tropical Ecology<br>Norwegian University of Life Sciences<br>Norway                                                             | Haugen, Thron<br>Professor Fish Ecology and Evolution<br>Norwegian University of Life Sciences<br>Norway                                                                                                    |
| Hauke, Sebastian<br>PhD Student<br>European Molecular Biology Laboratory<br>Germany                                                      | Haupt, Bernard *<br>Energy Management<br>Climatepeace<br>South Africa                                                                                               | Hauser-Davis, Rachel<br>Researcher<br>Fiocruz<br>Brazil                                                                                                                                                     |
| Hausmann, Alexander Emanuel<br>Master student<br>Ludwig-Maximilians-Universität München<br>Germany                                       | Hausmann, Anna<br>Conservation biologist, postdoc<br>University of Helsinki<br>Finland                                                                              | Hauss, Helena<br>Biological Oceanographer<br>GEOMAR<br>Germany                                                                                                                                              |

|                                                                                                                                                             |                                                                                                                            |                                                                                                                                     |
|-------------------------------------------------------------------------------------------------------------------------------------------------------------|----------------------------------------------------------------------------------------------------------------------------|-------------------------------------------------------------------------------------------------------------------------------------|
| Hausser, Yves<br>Professor, Natural Resource Management<br>University of Applied Sciences Western Switzerland<br>Switzerland                                | Hautier, Lionel<br>CNRS<br>France                                                                                          | Havens, Kayri<br>Senior Director, Plant Science and Conservation<br>Chicago Botanic Garden<br>United States of America (the)        |
| Havig, Jeff<br>Assistant Professor<br>University of Minnesota<br>United States of America (the)                                                             | Havron, Andrea<br>PhD Candidate, Statistics<br>University of Auckland<br>New Zealand                                       | Haw, Anna<br>South Africa                                                                                                           |
| hawes, colin<br>PhD student<br>Royal Holloway University of London<br>United Kingdom of Great Britain and Northern Ireland                                  | Hawes, Ian<br>Professor, Freshwater Ecology<br>University of Waikato<br>New Zealand                                        | Hawkes, Jeffrey<br>Researcher<br>Uppsala University<br>Sweden                                                                       |
| Hawkins, Julie<br>Senior Lecturer in Marine Environmental Management<br>University of York<br>United Kingdom of Great Britain and Northern Ireland<br>(the) | Hawkins, Melissa<br>Assistant Professor, Curator of Mammals<br>Humboldt State University<br>United States of America (the) | Hawkins, Ronnie<br>Philosophy<br>University of Central Florida (retired)<br>Costa Rica                                              |
| Hawkins, Ronnie<br>Environmental Philosophy<br>University of Central Florida (retired)<br>United States of America (the)                                    | Haworth, Penny<br>Manager: Science Communication and Governance (RRI)<br>South Africa                                      | Hawwa, Hussam *<br>Water Resources<br>Difaf<br>Lebanon                                                                              |
| Hay, Amanda<br>Fish Biologist<br>Australia                                                                                                                  | Hay, Julien<br>Assistant professor in economics<br>Université de Brest<br>France                                           | Haydon, Trent<br>Marine Biologist<br>University of Technology, Sydney<br>Australia                                                  |
| Hayes, Brittany<br>Australia                                                                                                                                | Hayes, Christine<br>MS Candidate Raptor Biology<br>Boise State University<br>United States of America (the)                | Hayes, Loren<br>Associate Professor, Behavioral Ecology<br>University of Tennessee at Chattanooga<br>United States of America (the) |
| Hayford, Barbara<br>Professor of Life Sciences<br>Wayne State College<br>United States of America (the)                                                     | Hayward, Lydia<br>Postdoctoral Research Associate, Psychology<br>UNSW Sydney<br>Australia                                  | Hayward, Matt<br>Associate Professor of Conservation<br>University of Newcastle<br>Australia                                        |
| Hayward, Robin<br>PhD Candidate in Ecology<br>University of Stirling<br>United Kingdom of Great Britain and Northern Ireland<br>(the)                       | Haywood, Penny<br>Geoscientist<br>Bangor University<br>United Kingdom of Great Britain and Northern Ireland<br>(the)       | Hazard, Lisa<br>Associate Professor of Biology<br>Montclair State University<br>United States of America (the)                      |



|                                                                                                                                                             |                                                                                                                                    |                                                                                                                                                                                                                                                                                                                                                  |
|-------------------------------------------------------------------------------------------------------------------------------------------------------------|------------------------------------------------------------------------------------------------------------------------------------|--------------------------------------------------------------------------------------------------------------------------------------------------------------------------------------------------------------------------------------------------------------------------------------------------------------------------------------------------|
| Hazel, Julia<br>Adjunct Research Fellow<br>James Cook University<br>Australia                                                                               | Hazel, Wade<br>Professor of Biology<br>DePauw University<br>United States of America (the)                                         | Hazen, Samuel<br>Associate Professor of Biology<br>University of Massachusetts<br>United States of America (the)                                                                                                                                                                                                                                 |
| He, Fengzhi<br>PhD student (Freshwater ecology)<br>Leibniz-Institute of Freshwater Ecology and Inland<br>Fisheries (IGB)<br>Germany                         | HE, Kai<br>The Kyoto University Museum<br>Japan                                                                                    | Head, Jessica<br>Plant Pathologist<br>University of Pretoria<br>South Africa                                                                                                                                                                                                                                                                     |
| Heal, Geoffrey<br>Professor of Economics<br>Columbia Business School<br>United States of America (the)                                                      | Healey, John<br>Professor of Forest Sciences<br>Bangor University<br>United Kingdom of Great Britain and Northern Ireland<br>(the) | Heaney, Lawrence<br>Negaunee Curator of Mammals<br>Field Museum of Natural History<br>United States of America (the)                                                                                                                                                                                                                             |
| Heard, Matthew<br>Assistant Professor of Biology<br>Belmont University<br>United States of America (the)                                                    | Hearn, Andrew<br>Postdoctoral researcher<br>University of Oxford<br>United Kingdom of Great Britain and Northern Ireland<br>(the)  | Hearn, Gail<br>Conservation Biology<br>Drexel University<br>United States of America (the)                                                                                                                                                                                                                                                       |
| Heath, Douglas<br>Professor Emeritus of Geography, Geology, and<br>Environmental Studies<br>Northampton Community College<br>United States of America (the) | Heatlie, Jeff<br>Ecology<br>Griffith University<br>Australia                                                                       | Hebberecht López, Laura<br>MPhil in Zoology student<br>University of Cambridge<br>United Kingdom of Great Britain and Northern Ireland<br>(the)                                                                                                                                                                                                  |
| Hebestreit, Fabian<br>Mathematician<br>University of Bonn<br>Germany                                                                                        | Hecht, Susanna<br>Professor<br>UCLA<br>United States of America (the)                                                              | Hedayatkah, Abolghasem<br>PhD Candidate<br>Department of Aquatic Microbiology Institute for<br>Biodiversity and Ecosystem Dynamics (IBED) University of<br>Amsterdam;; And Department of Marine Microbiology<br>and Biogeochemistry (MMB), NIOZ Royal Institute for Sea<br>Research and Utrecht University, The Netherlands<br>Netherlands (the) |
| Hedrick, Stephen<br>Distinguished Professor, Immunology<br>UC San Diego<br>United States of America (the)                                                   | Heeb, Philipp<br>Director of Research<br>CNRS<br>France                                                                            | Heeley, Edward<br>Biochemistry<br>University of Exeter<br>United Kingdom of Great Britain and Northern Ireland<br>(the)                                                                                                                                                                                                                          |

|                                                                                                                                      |                                                                                                                                                              |                                                                                                                          |
|--------------------------------------------------------------------------------------------------------------------------------------|--------------------------------------------------------------------------------------------------------------------------------------------------------------|--------------------------------------------------------------------------------------------------------------------------|
| Heeren, Alexander<br>Post Doctoral Scholar-Natural Resource<br>University of California Merced<br>United States of America (the)     | Hegemann, Arne<br>Researcher in Ecophysiology<br>Lund University<br>Sweden                                                                                   | Hehre, James<br>Postdoctoral Fellow/ Marine Ecology<br>University of Western Australia<br>Australia                      |
| Heiden, Gustavo<br>Researcher, Botany & Genetic Resources<br>Embrapa<br>Brazil                                                       | Heil, Ethan<br>Civil Engineer / Environmental Scientist<br>United States of America (the)                                                                    | Heim, René<br>PhD Student<br>Macquarie University<br>Australia                                                           |
| Heim, Wieland<br>Researcher, Bird migration and conservation<br>Institute of Landscape Ecology, University of Münster<br>Germany     | Heimbürger, Lars-Eric<br>Research Scientist, Chemical Oceanographer<br>CNRS - Aix-Marseille-University- Mediterranean Institute<br>of Oceanography<br>France | Hein, Margaux<br>Marine ecologist<br>James Cook University<br>Australia                                                  |
| Heinen, Julia<br>MSc student in Ecology<br>University of Amsterdam<br>Netherlands (the)                                              | Heinsohn, Robert<br>Professor of Conservation Biology<br>Australian National University<br>Australia                                                         | Heinz, Cheryl<br>Associate Professor of Biological Sciences<br>Benedictine University<br>United States of America (the)  |
| Heinze, Alan<br>PhD Candidate - Production Ecology and Resource<br>Conservation<br>Wageningen UR<br>Mexico                           | Heinzelmann Figueira, Renata<br>Graduanda de Ciências Biológicas<br>Universidade de Brasilia<br>Brazil                                                       | Heise, Jeffrey<br>Prairie Research Ecologist<br>Northern Illinois University<br>United States of America (the)           |
| Heiss, Georg<br>Lecturer<br>Freie Universität Berlin, Dept. of Geological Sciences<br>Germany                                        | Heitkönig, Ignas<br>Asst Prof (Ecology)<br>Wageningen University<br>Netherlands (the)                                                                        | Hekkala, Anne-Maarit<br>Postdoc researcher, forest biodiversity<br>Swedish University of Agricultural Sciences<br>Sweden |
| Hekkala, Evon<br>Associate Professor Conservation Biology<br>Fordham University<br>United States of America (the)                    | Held, Alex<br>Principal Research Scientist<br>CSIRO<br>Australia                                                                                             | Hélène, Verheyden *<br>researcher<br>INRA<br>France                                                                      |
| Heleno, Ruben<br>Researcher (Ecology)<br>University of Coimbra<br>Portugal                                                           | Helfer, Joseph<br>PhD Student in Mathematics<br>Stanford University<br>United States of America (the)                                                        | Helgason, Halfdan<br>MSc in biology<br>Norway                                                                            |
| Helgen, Kristofer M.<br>Professor, Environment Institute and School of Biological<br>Sciences<br>University of Adelaide<br>Australia | Heller, Klaus-Gerhard<br>Zoology<br>Germany                                                                                                                  | Heller, Richard<br>Scientist<br>Heller<br>Portugal                                                                       |

|                                                                                                                                        |                                                                                                                                         |                                                                                                                                                      |
|----------------------------------------------------------------------------------------------------------------------------------------|-----------------------------------------------------------------------------------------------------------------------------------------|------------------------------------------------------------------------------------------------------------------------------------------------------|
| Helleu, Quentin<br>Postdoctorale fellow<br>University of Pennsylvania<br>United States of America (the)                                | Helliwell, John<br>retired Lecturer in Chemistry<br>Suffolk College<br>United Kingdom of Great Britain and Northern Ireland (the)       | Helm, Aveliina<br>Senior Researcher, Ecology<br>University of Tartu<br>Estonia                                                                       |
| Helm, Chantal<br>Ecologist/ Lecturer<br>University of Hertfordshire<br>United Kingdom of Great Britain and Northern Ireland (the)      | Helmert, Malte<br>Professor of Artificial Intelligence<br>University of Basel<br>Switzerland                                            | Helmkamp, Martin<br>Research Scientist (Biology)<br>University of Hawaii<br>United States of America (the)                                           |
| Helmreich, Stefan<br>Professor of Anthropology<br>MIT<br>United States of America (the)                                                | Helmstetter, Nicolas<br>Biology<br>University of Exeter<br>United Kingdom of Great Britain and Northern Ireland (the)                   | Helsen, Kenny<br>Post. Doc. Researcher<br>Norwegian University of Science and Technology<br>Norway                                                   |
| Hemala, Vladimír<br>PhD Student<br>Department of Botany and Zoology, Faculty of Science,<br>Masaryk University<br>Czech Republic (the) | Hemami, Mahmoud-Reza *<br>Associate professor of conservation ecology<br>Isfahan University of Technology<br>Iran (Islamic Republic of) | Hemberger, Jeremy<br>PhD Candidate, Entomology<br>University of Wisconsin-Madison<br>United States of America (the)                                  |
| Hemery, Lenaig<br>Marine Ecology & Evolution<br>United States of America (the)                                                         | Hemmendinger, David<br>Professor Emeritus of Computer Science<br>Union College<br>United States of America (the)                        | Hemming, Michael<br>PhD candidate<br>The University of East Anglia<br>United Kingdom of Great Britain and Northern Ireland (the)                     |
| Hemp, Andreas<br>Germany                                                                                                               | Hemp, Claudia<br>coordination reserach unit Kilimanjaro<br>Climate and Research Center Frankfurt, Germany<br>Germany                    | Henckel, Laura<br>Postdoctoral researcher in ecology<br>Swedish University of Agricultural Sciences<br>Sweden                                        |
| Henderson, Alan<br>Zoology/Entomology<br>Australia                                                                                     | Henderson, Cory<br>Ph. D. Candidate in Biology<br>Pennsylvania State University<br>United States of America (the)                       | Henderson, Deanna<br>Zoology/Entomology<br>Australia                                                                                                 |
| Henderson, Robert<br>United States of America (the)                                                                                    | Hendler, Gordon<br>Invertebrate Zoology<br>Natural History Museum of Los Angeles County<br>United States of America (the)               | Hendlin, Yogi<br>Environmental Philosopher and Public Health Researcher<br>University of California, San Francisco<br>United States of America (the) |

|                                                                                                                                   |                                                                                                                             |                                                                                                                            |
|-----------------------------------------------------------------------------------------------------------------------------------|-----------------------------------------------------------------------------------------------------------------------------|----------------------------------------------------------------------------------------------------------------------------|
| Hendrickson, Cary Yungmee<br>Postdoc researcher, environmental science and technology<br>The University of Rome Sapienza<br>Italy | Hendrickx, Michel E.<br>Senior Scientist Marine Biology<br>University Auton. Nac. Mexico<br>Mexico                          | Henle, Klaus<br>Conservation Biologist<br>UFZ Helmholtz Centre for Environmental Research<br>Germany                       |
| Henley, Michelle<br>Ecologist and CEO Elephants Alive<br>NGO Elephants Alive<br>South Africa                                      | Henneck, Jerry<br>Senoir Research Scientist/ Aquatic Ecologist<br>University of Minnesota<br>United States of America (the) | Hennesse, Thomas<br>Ph.D. student, Orchid Research Group<br>Université catholique de Louvain<br>Belgium                    |
| Hennessey, Shannon<br>PhD Student, Integrative Biology<br>Oregon State University<br>United States of America (the)               | Hennig, Jörg<br>Senior Lecturer in Applied Mathematics<br>University of Otago<br>New Zealand                                | Henning, Jeremiah<br>Postdoctoral Research Associate, Ecology<br>University of Minnesota<br>United States of America (the) |
| Henning, John<br>Professor, (Retired) Agricultural Economics<br>McGill University<br>Canada                                       | Henning, Tilo<br>Botany<br>Botanical Garden Botanical Museum Berlin<br>Germany                                              | Hennon, Tyler<br>Postdoctoral Scholar<br>Scripps Institution of Oceanography<br>United States of America (the)             |
| Henrique, Vinicios<br>Student<br>Unifesp<br>Brazil                                                                                | Henriques, Jorge<br>PhD student<br>CE3C - Center for ecology, evolution and environmental changes<br>Portugal               | Henry, Annie<br>PhD Candidate<br>University of Denver<br>United States of America (the)                                    |
| Henry, Catherine<br>Environmental Scientist<br>Canada                                                                             | HENRY, Claude<br>professor of sustainable development<br>Sciences Po Paris and Columbia University<br>France                | Henry, Donata<br>Senior Professor of the Practice<br>Tulane University<br>United States of America (the)                   |
| Henry, Greg<br>Professor, Ecology/Biogeography<br>University of British Columbia<br>Canada                                        | Henry, Mickaël<br>Researcher in ecology<br>INRA, Bee & Environment research unit<br>France                                  | Henry, Tantoh *<br>Researcher<br>University of the Witwatersrand<br>South Africa                                           |
| Henschel, Philipp<br>West and Central Africa Regional Director, Lion Program<br>Panthera<br>Gabon                                 | Henschell, Max<br>Wildlife Ecology<br>United States of America (the)                                                        | Hensmans, Manuel<br>Hensmans<br>Belgium                                                                                    |
| Hepburn, Lana<br>Environmental Science<br>Australia                                                                               | Hepp, Fábio<br>Professor of Zoology<br>Federal University of Rio de Janeiro<br>Brazil                                       | Heras, Francisco<br>Assistant Professor<br>Chemical Engineering Dpt. Universidad Autónoma de Madrid<br>Spain               |

|                                                                                                                                               |                                                                                                                                 |                                                                                                                                      |
|-----------------------------------------------------------------------------------------------------------------------------------------------|---------------------------------------------------------------------------------------------------------------------------------|--------------------------------------------------------------------------------------------------------------------------------------|
| Herbert, Ph.D., Betsy<br>President, Santa Cruz Mountains Bioregional Council<br>United States of America (the)                                | Herdean, Andrei<br>Postdoctoral researcher<br>University of Gothenburg<br>Sweden                                                | Heringer, Gustavo<br>PhD candidate in Botany<br>Universidade Federal de Viçosa<br>Brazil                                             |
| Hermann, Sharon<br>Assistant Professor, Biological Sciences<br>Auburn University<br>United States of America (the)                            | Hermógenes da Silva, Hugo Juliano<br>Phd student - Environment and Development<br>Federal University of Parana - UFPR<br>Brazil | Hermon, Karen<br>Environmental Scientist<br>Australia                                                                                |
| Hermsen, Ger<br>Chemistry and physics teacher<br>Raayland college<br>Netherlands (the)                                                        | Hermy, Martin<br>Full professor in ecology, conservation and urban green<br>University of Leuven (KU Leuven)<br>Belgium         | Hernandes, Fabio<br>Researcher<br>São Paulo State University<br>Brazil                                                               |
| Hernandes-Lopes, José<br>Post doctoral researcher<br>Universidade de São Paulo<br>Brazil                                                      | Hernandez, Adriana<br>PhD Student<br>Cornell University<br>United States of America (the)                                       | hernandez, diana<br>antropologia<br>Mexico                                                                                           |
| Hernandez, Maria Jesus *<br>Physicist<br>Universidad Autónoma de Madrid<br>Spain                                                              | HERNANDEZ, SOLIMARY<br>Ph. D. candidate<br>UNIVERSIDADE DE SÃO PAULO<br>Brazil                                                  | Hernández, Daniel<br>MSc in Ecology<br>JULANA<br>Uruguay                                                                             |
| Hernández, Lionel *<br>retired Professor and Researcher<br>Universidad Nacional Experimental de Guayana<br>Venezuela (Bolivarian Republic of) | Hernández, Sandra<br>Biology<br>Universidad Rey Juan Carlos<br>Spain                                                            | Hernández Plaza, María Eva<br>PhD<br>Institute for Sustainable Agriculture. Spanish National<br>Research Council (IAS-CSIC)<br>Spain |
| Hernandez Rosales, Maribel<br>Conacyt Fellow Researcher<br>Institute of Mathematics, UNAM<br>Mexico                                           | Hernandez Santin, Lorna<br>Postdoctoral Research Fellow<br>University of Queensland<br>Australia                                | Hernández-Apolinar, Mariana<br>Plant Ecology<br>Universidad Nacional Autónoma de México<br>Mexico                                    |
| Hernández-Castellano, Carlos<br>Researcher, Ecology<br>CREAF<br>Spain                                                                         | Hernandez-Coronado, Hector<br>Associate professor<br>Universidad Nacional Autonoma de Mexico<br>Mexico                          | Hernandez-Coronado, Marcela<br>Postdoctoral fellow<br>New York University<br>United States of America (the)                          |
| Hernández-del Amo, Elena<br>Spain                                                                                                             | Hernandez-Manrique, Olga<br>Social science an biodiversity knowlegde<br>Alexander von Humboldt Institute<br>Colombia            | Hernandez-Salmeron, Ivan Raniero<br>PhD Candidate - Ecology<br>Wageningen University<br>Netherlands (the)                            |

|                                                                                                                   |                                                                                                                     |                                                                                                                                                              |
|-------------------------------------------------------------------------------------------------------------------|---------------------------------------------------------------------------------------------------------------------|--------------------------------------------------------------------------------------------------------------------------------------------------------------|
| Hernández-Sandoval, Luis<br>Plant Systematics Professor/Researcher<br>Universidad Autónoma de Querétaro<br>Mexico | Hernandez-Santana, Virginia<br>postdoctoral fellow in críos ecophysiology<br>IRNAS-CSIC<br>Spain                    | Hernandez-Serna, Andres<br>Ecology and Remote sensing<br>University of Maryland<br>United States of America (the)                                            |
| Hero, Jean-Marc<br>Professor<br>University of the Sunshine Coast<br>Australia                                     | Herold, Kevan<br>Professor<br>Yale University<br>United States of America (the)                                     | Herrando-Pérez, Salvador<br>Postdoc (Ecology and Genetics)<br>Spanish National Research Council<br>Spain                                                     |
| Herranz, Daniel<br>Demonstrator in Chemistry<br>Universidad Autónoma de Madrid<br>Spain                           | Herranz, Jesús<br>Tenured Full-time Lecturer / Ecology<br>Universidad Autónoma de Madrid, Dpto de Ecología<br>Spain | Herranz Muñoz, Vanessa<br>Project Leader. Conservation of Biodiversity<br>Bastet Conservation<br>Cambodia                                                    |
| Herremans, Marc<br>Head of Research<br>Natuurpunt<br>Belgium                                                      | Herrera, Mariana<br>Biology and microbiology student<br>University of the Andes Colombia<br>Colombia                | Herrero, Asier<br>PhD Researcher (Ecology)<br>University of Basque Country<br>Spain                                                                          |
| Herrero, Pilar<br>University Professor<br>Universidad Autónoma de Madrid<br>Spain                                 | Herreros, Claudia<br>Bioquímico<br>Pontificia Universidad Católica de Chile<br>Chile                                | Herrford, Josefina<br>PhD student<br>Geomar Helmholtz Centre for Ocean Research<br>Germany                                                                   |
| Herring, Matthew<br>Conservation Biology<br>Charles Darwin University<br>Australia                                | Herring, Susan<br>Professor, biologist<br>University of Washington<br>United States of America (the)                | Herrmann, Kathrin<br>European Specialist in Animal Welfare Science, Ethics and Law<br>Bloomberg School of Public Health, Johns Hopkins University<br>Germany |
| Herrmann, Tobias<br>Master Student in Toxicology<br>SweTox GmbH<br>Sweden                                         | Hershberger, Wil<br>United States of America (the)                                                                  | Hershey, Anne<br>Distinguished Professor of Biology<br>University of North Carolina at Greensboro<br>United States of America (the)                          |
| Hertel, Dietrich<br>Plant Ecologist<br>University of Goettingen<br>Germany                                        | Hertz, Andreas<br>Postdoctoral Researcher - Disease Ecology<br>UMass Boston<br>United States of America (the)       | Herz, Katharina<br>Germany                                                                                                                                   |
| Herzog, Lisa<br>Paleontology<br>NC Museum of Natural Sciences<br>United States of America (the)                   | Herzog, Sebastian<br>Scientific Director<br>Asociacion Armonia<br>Bolivia (Plurinational State of)                  | Herzog, Stefan<br>Decision Scientist<br>Max Planck Institute for Human Development<br>Germany                                                                |

|                                                                                                                                               |                                                                                                                                                   |                                                                                                                         |
|-----------------------------------------------------------------------------------------------------------------------------------------------|---------------------------------------------------------------------------------------------------------------------------------------------------|-------------------------------------------------------------------------------------------------------------------------|
| Herzon, Iryna<br>associate professor, university lecturer<br>University of Finland<br>Finland                                                 | Heshusius, Steven<br>PhD student, Biomedical science<br>Sanquin Research<br>Netherlands (the)                                                     | Heshusius, Tim<br>Graduate student<br>Amsterdam Medical Centre<br>Netherlands (the)                                     |
| Hess, Gérald<br>Maître d'enseignement et de recherche<br>Université de Lausanne<br>Switzerland                                                | Hessberg, Andreas<br>postDoc Disturbance Ecology<br>University of Bayreuth<br>Germany                                                             | Hessel, John<br>BiologyEntomology<br>United States of America (the)                                                     |
| Hesselberg, Thomas<br>Lecturer in Environmental Science<br>University of Oxford<br>United Kingdom of Great Britain and Northern Ireland (the) | Hettwer Giehl, Eduardo L.<br>Post Doc Fellow<br>Federal University of Santa Catarina<br>Brazil                                                    | Heuchel, Franz<br>PhD student in Acoustical Engineering<br>Technical University of Denmark<br>Denmark                   |
| Heuer, Amelie<br>Head of Programmes and Impact<br>Teach A Man To Fish<br>United Kingdom of Great Britain and Northern Ireland (the)           | Heuertz, Myriam<br>Research Scientist, Plant population genetics<br>INRA<br>France                                                                | Heuzé, Céline<br>Department of Marine Sciences, University of Gothenburg<br>Sweden                                      |
| Hevia, Violeta<br>Post-doctoral researcher of Ecology<br>Universidad Autónoma de Madrid<br>Spain                                              | Hevia-Koch, Pablo<br>PhD St. Energy Economics<br>Technical University of Denmark (DTU)<br>Denmark                                                 | Hewison, Mark<br>Research director<br>INRA<br>France                                                                    |
| Hewitt, Chad<br>Dean of Science, Marine Ecology<br>University of Waikato<br>New Zealand                                                       | Hewlett, Mark<br>Postdoctoral researcher, synthetic biology<br>University of Exeter<br>United Kingdom of Great Britain and Northern Ireland (the) | Hey, Ana Paula<br>Professor of Sociology<br>University of Sao Paulo<br>Brazil                                           |
| Heystek, Mercia<br>South Africa                                                                                                               | Heywood, Eleanor<br>Research Associate, Marine Geospatial Ecology<br>Duke University<br>United States of America (the)                            | Hibat Allah, Loumassine<br>PhD, Ecology and Environment<br>University Ibn Khaldoun, Tiaret<br>Algeria                   |
| Hicham-Stéphane, Afeissa<br>Philosophy<br>Dijon<br>France                                                                                     | Hickerson, Cari-Ann<br>Ecology Professor<br>John Carroll University<br>United States of America (the)                                             | Hickey, Anthony<br>Associate Professor Comparative Physiology and Biochemistry<br>University of Auckland<br>New Zealand |
| Hickey, Phil<br>Environmental Scientist - Spatial<br>Northern Territory Government<br>Australia                                               | Hickman, Gene<br>Wildlife Biology<br>United States of America (the)                                                                               | Hicks, James<br>PhD student<br>University of Nottingham<br>United Kingdom of Great Britain and Northern Ireland (the)   |

|                                                                                                                                |                                                                                                                                                                                |                                                                                                                                                               |
|--------------------------------------------------------------------------------------------------------------------------------|--------------------------------------------------------------------------------------------------------------------------------------------------------------------------------|---------------------------------------------------------------------------------------------------------------------------------------------------------------|
| Hidalgo, Christian<br>Veterinarian<br>Universidad Andres Bello<br>Chile                                                        | Hiddes, Jetske<br>Master student Biology bio-interactions<br>NIOO KNAW & Wageningen University<br>Netherlands (the)                                                            | Hiebenthal, Claas<br>Marine Biologist<br>GEOMAR<br>Germany                                                                                                    |
| Hieber, Mäggi<br>Scientific Coordinator<br>Germany                                                                             | Hiebert, Laurel<br>Postdoctoral Fellow<br>University of Sao Paulo<br>Brazil                                                                                                    | Hiemstra, Auke-Florian<br>Master student 'Evolution, Biodiversity and Conservation.<br>Naturalis Biodiversity Center / Leiden University<br>Netherlands (the) |
| Hiemstra, John<br>Associate Professor<br>Swansea University<br>United Kingdom of Great Britain and Northern Ireland<br>(the)   | Hietala, Sanna<br>Researcher<br>Natural Resources Institute Finland<br>Finland                                                                                                 | Hietala-Henschell, Katie<br>Conservation Biologist<br>Xerces Society<br>United States of America (the)                                                        |
| Higashikawa, Emílio<br>Forest Engineer<br>INPA<br>Brazil                                                                       | Higgins, Emily<br>MSc Student in Biology<br>Dalhousie University<br>Canada                                                                                                     | Higgins, Lila<br>Senior Manager, Citizen Science<br>Natural History Museum of Los Angeles County<br>United States of America (the)                            |
| Higgins, Mark<br>Biodiversity Specialist<br>PhD, Duke University<br>United States of America (the)                             | Higgins, Peter<br>Professor of Outdoor Environmental & Sustainability<br>Education<br>University of Edinburgh<br>United Kingdom of Great Britain and Northern Ireland<br>(the) | Higgins, Sahran<br>Research Scientist (Ecology)<br>United Kingdom of Great Britain and Northern Ireland<br>(the)                                              |
| Higgs, Kerry<br>Associate, Geography and Environmental Studies<br>School of Land and Food, University of Tasmania<br>Australia | Higham, William<br>Natural Resource Science/Agricultural Extension<br>Cape York Natural Resource Management<br>Australia                                                       | Higuti, Janet<br>Universidade Estadual de Maringá<br>Brazil                                                                                                   |
| Hilário, Renato<br>Professor/Environmental Sciences<br>Federal University of Amapá<br>Brazil                                   | Hilbeck, Angelika<br>Senior Scientist - Agroecology & Environmental Biosafety<br>Swiss Federal Institute of Technology Zurich<br>Switzerland                                   | Hildebrand, Falk<br>Postdoc, Biology<br>EMBL Heidelberg<br>Germany                                                                                            |
| Hildebrandt, Anke<br>Assistent Professor<br>Friedrich Schiller University Jena<br>Germany                                      | Hildebrandt, Nicole<br>PostDoc, Polar Biological Oceanography<br>Alfred-Wegener-Institut Helmholtz-Zentrum für Polar-<br>und Meeresforschung<br>Germany                        | Hilgen, Frits<br>Geologist<br>Faculty of Geosciences, Utrecht University<br>Netherlands (the)                                                                 |



|                                                                                                                                                          |                                                                                                                                     |                                                                                                                                        |
|----------------------------------------------------------------------------------------------------------------------------------------------------------|-------------------------------------------------------------------------------------------------------------------------------------|----------------------------------------------------------------------------------------------------------------------------------------|
| Hilgen, Sander<br>Student<br>Leiden University<br>Netherlands (the)                                                                                      | Hill, Lance<br>Australia                                                                                                            | Hill, Louise<br>PhD candidate in Plant Sciences<br>University of Oxford<br>United Kingdom of Great Britain and Northern Ireland (the)  |
| Hill, Malcolm<br>Professor of Biology<br>University of Richmond<br>United States of America (the)                                                        | Hill, Michael<br>Professor Emeritus Earth System Science and Policy<br>University of North Dakota<br>United States of America (the) | Hill, Rosemary<br>Principal Research Scientist and Geographer<br>CSIRO<br>Australia                                                    |
| Hill, Stuart<br>Emeritus Professor & Foundation Chair of Social Ecology<br>Western Sydney University<br>Australia                                        | hiller, alicia<br>Canada                                                                                                            | Hillgarth, Nigella<br>Visiting Scientist<br>Center for Ecosystem Sentinels, University of Washington<br>United States of America (the) |
| Hilliou, Frédérique<br>Research engineer in biology<br>INRA<br>France                                                                                    | Hillman, Jess<br>Marine Geoscience<br>Germany                                                                                       | Hillman, Katy<br>Wildlife conservation<br>RSPB<br>United Kingdom of Great Britain and Northern Ireland (the)                           |
| Hilt, Sabine<br>Senior Scientist in Aquatic Ecology<br>Leibniz-Institute of Freshwater Ecology and Inland Fisheries Berlin<br>Germany                    | Hiltbrunner, Andreas<br>Professor of Molecular Plant Physiology<br>University of Freiburg<br>Germany                                | Hilton Jr., Bill<br>Executive Director<br>Hilton Pond Center for Piedmont Natural History<br>United States of America (the)            |
| Himmelreich, Uwe<br>Professor Biomedical Sciences<br>KU Leuven<br>Belgium                                                                                | Hinaux, Hélène<br>Postdoctoral fellow in Biology<br>Ludwig Maximilians Universität Munich<br>Germany                                | Hindle, Charlie<br>Environmental scientist<br>Australia                                                                                |
| Hines, Ellen<br>Associate Director and Professor of Geography<br>Romberg Tiburon Center San Francisco State University<br>United States of America (the) | Hingst-Zaher, Erika<br>Scientific Researcher<br>Instituto Butantan<br>Brazil                                                        | Hinojosa-Centeno, M. Belén<br>Assistant professor / Ecology<br>Universidad de Castilla-La Mancha<br>Spain                              |
| Hins, Caroline<br>Biologiste<br>Ministère des Forêts, de la Faune et des Parcs du Québec<br>Canada                                                       | Hinsinger, Damien Daniel<br>Postdoctoral researcher<br>Guangxi University<br>China                                                  | Hintzsche, Jessica<br>Research assistant<br>University of Hawaii<br>United States of America (the)                                     |

|                                                                                                                                               |                                                                                                                                     |                                                                                                                                                                        |
|-----------------------------------------------------------------------------------------------------------------------------------------------|-------------------------------------------------------------------------------------------------------------------------------------|------------------------------------------------------------------------------------------------------------------------------------------------------------------------|
| Hinzman, Larry<br>Professor of Civil and Environmental Engineering<br>University of Alaska Fairbanks<br>United States of America (the)        | Hinzmann, Mariana<br>PhD<br>CIIMAR<br>Portugal                                                                                      | Hipólito, Juliana<br>Post doc researcher<br>Irnard/UNRN<br>Argentina                                                                                                   |
| Hipp, Andrew<br>Senior Scientist in Plant Systematics<br>The Morton Arboretum<br>United States of America (the)                               | Hiraldo, Fernando<br>Research profesor ad honoren<br>Estacion Biológica de Doñana CSIC<br>Spain                                     | Hird, Cameron<br>PhD Reseracher<br>The University of Exeter<br>United Kingdom of Great Britain and Northern Ireland (the)                                              |
| Hiriart, Marcia<br>Professor/Biomedicine, Physiology<br>Instituto de Fisiología Celular, Universidad Nacional<br>Autonoma de Mexico<br>Mexico | Hirota, Marina<br>Federal University of Santa Catarina<br>Brazil                                                                    | Hiroyasu, Elizabeth<br>PhD Candidate<br>Bren School of Environmental Science & Management,<br>University of California Santa Barbara<br>United States of America (the) |
| Hirsbrunner, Moritz<br>Göttingen University<br>Germany                                                                                        | Hirsch, Heidi<br>Postdoctoral Research Fellow<br>Centre for Invasion Biology, Stellenbosch University<br>South Africa               | Hirschinger, Julien<br>DVM, PhD<br>Ecole Nationale Vétérinaire de Toulouse<br>France                                                                                   |
| Hita Garcia, Francisco<br>Staff Scientist<br>Okinawa Institute of Science and Technology Graduate<br>University<br>Japan                      | HITCHCOCK, Peter<br>Forest Science, Conservation<br>WCPA<br>Australia                                                               | Hitchcock, Susan<br>MA Environmental Education Graduate Student<br>Royal Roads University<br>Canada                                                                    |
| Hitchins, Peter<br>Retired game ranger<br>Nil<br>United Kingdom of Great Britain and Northern Ireland (the)                                   | Hitchins, Peter<br>Retired game ranger<br>Game Rangers Association of Africa<br>South Africa                                        | Hixon, Mark *<br>Endowed Professor of Marine Biology<br>University of Hawaii<br>United States of America (the)                                                         |
| Hlina, Paul<br>UWS-Lake Superior Research Institute, Plant Science -<br>Taxonomy (emeritus)<br>UW-Superior<br>United States of America (the)  | Hlusko, Leslea<br>Associate Professor of Integrative Biology<br>University of California Berkeley<br>United States of America (the) | Ho, Lik Theng<br>Student in Marine Biology<br>University of Southampton/James Cook University<br>Malaysia                                                              |
| Ho, Ming-Jay<br>Research Specialist<br>Biodiversity Rearch center , Academia Sinica<br>Taiwan                                                 | Ho, Ofalia<br>Honours Student - Environmental Science<br>The University of Queensland<br>Australia                                  | Hoaghia, Alexandra<br>Environmental science<br>INOE 2000, ICIA Cluj-Napoca<br>Romania                                                                                  |

|                                                                                                                                              |                                                                                                                                                     |                                                                                                                                                  |
|----------------------------------------------------------------------------------------------------------------------------------------------|-----------------------------------------------------------------------------------------------------------------------------------------------------|--------------------------------------------------------------------------------------------------------------------------------------------------|
| Hoarau, Ludovic<br>Msc Marine Biodiversity and Conservation<br>Marine Sea Turtle Research Center<br>Réunion                                  | Hoare, Robert<br>systematist<br>New Zealand                                                                                                         | Hoareau, Yves<br>Research scientist in Conservation genetics and Wildlife biology.<br>University of Washington<br>United States of America (the) |
| Hobbs, Ralph<br>Ecologist<br>Natural England<br>United Kingdom of Great Britain and Northern Ireland (the)                                   | Hobbs, Richard<br>Professor of Ecology<br>University of Western Australia<br>Australia                                                              | Hobson, Angela<br>Assistant Dean for Public Health<br>Washington University in St. Louis<br>United States of America (the)                       |
| Hobson, Keziah<br>PhD student - Conservation Science<br>University of Aberdeen<br>United Kingdom of Great Britain and Northern Ireland (the) | Hocevar, John<br>Marine Biology<br>Greenpeace<br>United States of America (the)                                                                     | Hoch, Peter<br>Curator/ Botany<br>Missouri Botanical Garden<br>United States of America (the)                                                    |
| HOCHER, Valérie<br>reserche Scientist<br>IRD<br>France                                                                                       | Hochfeld, Paul<br>Emergency Physician<br>Retired<br>United States of America (the)                                                                  | Hochheiser, Harry<br>Assistant Professor, Biomedical Informatics<br>University of Pittsburgh<br>United States of America (the)                   |
| Hochkirch, Axel<br>Professor, Conservation Biology<br>Trier University<br>Germany                                                            | Hockings, Marc<br>Emeritus Professor, Environmental Management<br>University of Queensland<br>Australia                                             | Hóðar, José A.<br>Ecology, Associate Professor<br>University of Granada<br>Spain                                                                 |
| Hodder, Grace<br>Ecology<br>University of Adelaide<br>Australia                                                                              | Hodge, Anne-Marie<br>Professor of Biology<br>Hiwassee College<br>United States of America (the)                                                     | Hodge, Sarah<br>Senior Lecturer (Bioscience's)<br>University of Exeter<br>United Kingdom of Great Britain and Northern Ireland (the)             |
| Hodgson, Danielle<br>Postgraduate Ecologist<br>Griffith University<br>Australia                                                              | Hodnebrog, Øivind<br>Researcher, Atmospheric Sciences<br>CICERO<br>Norway                                                                           | Hodum, Peter<br>Associate Professor, Conservation Biology<br>University of Puget Sound<br>United States of America (the)                         |
| Hoeinghaus, David<br>Associate Professor, Aquatic Ecology<br>University of North Texas<br>United States of America (the)                     | Hoeksema, Bert<br>Senior Researcher<br>Netherlands (the)                                                                                            | Hoekstra, Hopi<br>Professor, Biology<br>Harvard University<br>United States of America (the)                                                     |
| Hoekstra, Paul<br>PhD student<br>Naturalis Biodiversity Center Leiden<br>Netherlands (the)                                                   | Hoekzema, Renee<br>PhD student Mathematics, PhD Palaeontology<br>University of Oxford<br>United Kingdom of Great Britain and Northern Ireland (the) | Hoelzel, Rus<br>Professor of Molecular Ecology<br>Durham University<br>United Kingdom of Great Britain and Northern Ireland (the)                |

|                                                                                                                                                                                    |                                                                                                                            |                                                                                                                                                         |
|------------------------------------------------------------------------------------------------------------------------------------------------------------------------------------|----------------------------------------------------------------------------------------------------------------------------|---------------------------------------------------------------------------------------------------------------------------------------------------------|
| Hof, Anouschka<br>Assistant professor<br>Wageningen University<br>Netherlands (the)                                                                                                | Hof, Barbara<br>Climate Scientist<br>University of Hamburg<br>Germany                                                      | Hof, Christian<br>Postdoctoral Researcher, ecology/biogeography<br>Senckenberg Biodiversity and Climate Research Centre<br>Germany                      |
| Hofer, Heribert<br>Professor, Behavioural Ecology and Conservation Science<br>Leibniz Institute for Zoo & Wildlife Research Berlin<br>Germany                                      | Hoffman, Bruce<br>Botanical Consultant<br>Amazon Conservation Team<br>United States of America (the)                       | Hoffman, Marco<br>Botanist/taxonomist<br>Naktuinbouw<br>Netherlands (the)                                                                               |
| Hoffman, Peter *<br>Professor of Mathematics<br>University of Waterloo<br>Canada                                                                                                   | Hoffmann, Andre<br>Biologist<br>Museu Nacional do Rio de Janeiro - Universidade Federal<br>do Rio de Janeiro<br>Brazil     | Hoffmann, Ben<br>Ecologist<br>CSIRO<br>Australia                                                                                                        |
| Hoffmann, Emily<br>PhD Candidate - Conservation Biology<br>The University of Western Australia<br>Australia                                                                        | Hoffmann, Karl<br>PhD Student<br>Technical University Dresden, Dresden, Germany<br>Germany                                 | Hoffmann, Mathias<br>Geoecology<br>Leibniz Centre for Agricultural Landscape Research<br>Germany                                                        |
| Hoffmann, Rachel<br>Director, Conservation Outcomes<br>United Kingdom of Great Britain and Northern Ireland<br>(the)                                                               | Hoffmann, Ralf<br>Marine Biology<br>Alfred Wegener Institute, Helmholtz Centre for Polar and<br>Marine Research<br>Germany | HOFFMANN, RODOLFO<br>Senior Professor<br>University of São Paulo<br>Brazil                                                                              |
| Hoffmann, William<br>Professor<br>North Carolina State University<br>United States of America (the)                                                                                | Hoffnagle, Timothy<br>Fisheries Biologist<br>Tacoma Power<br>United States of America (the)                                | Hofhansl, Florian<br>University Assistant (Post Doctoral Researcher)<br>University of Vienna<br>Austria                                                 |
| Höfle, Ursula<br>Research professor on diseases of avian wildlife in the<br>Health and Biotechnology Research Group<br>Instituto de Investigación en Recursos Cinegéticos<br>Spain | Hofman, Maarten<br>Conservation biology<br>University of Goettingen & Bangor University<br>Germany                         | Hofmann, Erich<br>PhD Student, Department of Biological Sciences<br>Clemson University, Clemson, South Carolina 29634<br>United States of America (the) |
| Hofmeester, Tim<br>Postdoc in wildlife ecology<br>Wageningen university<br>Netherlands (the)                                                                                       | Hofmeister, Mirella<br>MSc Biodiversity, Ecology and Evolution<br>Georg-August University Göttingen<br>Germany             | Hogan, J. Aaron<br>PhD student / tropical forest ecology<br>Florida International University<br>United States of America (the)                          |

|                                                                                                                                                   |                                                                                                                                   |                                                                                                                                                          |
|---------------------------------------------------------------------------------------------------------------------------------------------------|-----------------------------------------------------------------------------------------------------------------------------------|----------------------------------------------------------------------------------------------------------------------------------------------------------|
| Hogan, James Aaron<br>Florida International University<br>United States of America (the)                                                          | Hogan, Lee<br>Consultant Clinical Psychologist<br>Bangor University<br>United Kingdom of Great Britain and Northern Ireland (the) | Hogendoorn, Katja<br>Entomologist<br>Australia                                                                                                           |
| Hogle, Ingrid *<br>Plant Ecologist and GIS Manager<br>San Francisco Estuary Invasive Spartina Project<br>United States of America (the)           | Hohensee, Christiane<br>Scientific Consultant<br>Federal Association of People for Animal Rights Germany<br>Germany               | Höing, Andrea<br>Research Assistant/ PhD student<br>Bonn University<br>Germany                                                                           |
| Hojamberdiev, Mirabbos *<br>Senior Researcher<br>Turin Polytechnic University in Tashkent<br>Uzbekistan                                           | Hokamp, Sascha<br>Postdoctoral Researcher<br>Universität Hamburg<br>Germany                                                       | Hölck, Lasse<br>Historian<br>Latin American Institute at Free University Berlin<br>Germany                                                               |
| Holdaway, Robert<br>Ecologist<br>New Zealand                                                                                                      | Hole, Georgia<br>PhD Student<br>University of Oxford<br>United Kingdom of Great Britain and Northern Ireland (the)                | Hollanda Carvalho, Pedro<br>Professor/Researcher on Evolution<br>UFRJ<br>Brazil                                                                          |
| Hollander, Jessy<br>Biology<br>Utrecht University<br>Netherlands (the)                                                                            | Hollenbeck, Jeff<br>Ecologist<br>United States of America (the)                                                                   | Hollington, Dr Philip<br>Senior Research Fellow, agricultural science<br>Bangor University<br>United Kingdom of Great Britain and Northern Ireland (the) |
| Hollister, Robert<br>Professor of Biology<br>Grand Valley State University<br>United States of America (the)                                      | Hollister, Ryan<br>Geoscience & Environmental Science Educator<br>Turlock High School<br>United States of America (the)           | Holm, Geoffrey<br>Associate Professor of Biology<br>Colgate University<br>United States of America (the)                                                 |
| Holm, Stig-Olof<br>Associate professor in ecology<br>IDepartment of Ecology and Environmental Science,<br>Umeå University, Umeå, Sweden<br>Sweden | Holman, Luke<br>PhD Student<br>University of Southampton<br>United Kingdom of Great Britain and Northern Ireland (the)            | Holmes, Amelia *<br>Socio-Economic aspects of Conservation<br>The University of Queensland<br>Australia                                                  |
| Holmes, Glen<br>marine ecologist<br>Australia                                                                                                     | Holmes, Marion<br>PhD Candidate in Botany specialising in diatoms<br>Nelson Mandela University<br>South Africa                    | Holmes, Pablo<br>Associate Professor<br>University of Brasilia<br>Brazil                                                                                 |
| Holmes, Patricia<br>Biophysical Specialist<br>City of Cape Town<br>South Africa                                                                   | Holmes, Richard T.<br>Professor Emeritus<br>Dartmouth College<br>United States of America (the)                                   | Holmgren, Noel<br>Head of Department of Aquatic resources<br>Swedish University of Agriculture<br>Sweden                                                 |

|                                                                                                                                                                           |                                                                                                                                                |                                                                                                                           |
|---------------------------------------------------------------------------------------------------------------------------------------------------------------------------|------------------------------------------------------------------------------------------------------------------------------------------------|---------------------------------------------------------------------------------------------------------------------------|
| Holroyd, Susan<br>Wildlife Biologist/Consultant<br>Alberta Community Bat Program<br>Canada                                                                                | Holthuijzen, Wieteke<br>Environmental Science<br>University of Idaho<br>United States of America (the)                                         | Holtslag, Frank<br>Biology teacher<br>St. Bonifatius college<br>Netherlands (the)                                         |
| Holwell, Greg<br>Associate Professor, and President of the New Zealand<br>Entomological Society<br>University of Auckland<br>New Zealand                                  | Hołyńska, Maria<br>Associate Professor, zoology<br>Museum and Institute of Zoology Polish Academy of<br>Sciences<br>Poland                     | Hołyński, Roman Bohdan<br>biologist, PhD<br>Poland                                                                        |
| Holyoak, Marcel<br>Professor and Chair, Ecologist<br>Department of Environmental Science and Policy,<br>University of California, Davis<br>United States of America (the) | Holz, Andres<br>Assistant Professor<br>Portland State University<br>United States of America (the)                                             | Holzman, Roi<br>Professor of Zoology<br>Tel Aviv University<br>Israel                                                     |
| Holzwarth, Frederic<br>Postdoc Forest Ecology, Biodiversity and Ecosystem<br>Functioning<br>University Leipzig, University Göttingen<br>Germany                           | Hom, Calvin<br>Instructor<br>City College of San Francisco<br>United States of America (the)                                                   | Homan, Rebecca<br>Associate Professor of Biology<br>Denison University<br>United States of America (the)                  |
| Homberger, Dominique G.<br>Professor of Biological Sciences<br>Louisiana State University<br>United States of America (the)                                               | Homeier, Juergen<br>Postdoctoral researcher<br>University of Goettingen<br>Germany                                                             | Honan, Patrick<br>Manager, Live Exhibits Unit<br>Museum Victoria<br>Australia                                             |
| Hone, Robert<br>Lecturer in Navigation<br>Plymouth University<br>United Kingdom of Great Britain and Northern Ireland<br>(the)                                            | Höner, Oliver<br>Senior scientist<br>Leibniz Institute for Zoo and Wildlife Research<br>Germany                                                | Honeycutt, Rodney<br>University Professor/Biology<br>Honeycutt<br>United States of America (the)                          |
| Honey-Roses, Jordi<br>Planning<br>University of British Columbia<br>Canada                                                                                                | Hong, Suk Bong<br>Professor<br>OISTECH<br>Korea (the Republic of)                                                                              | Honkanen, Anna<br>Post-doctoral researcher, biology<br>Lund University<br>Sweden                                          |
| Hons, Michael<br>Structural Biology<br>EMBL<br>France                                                                                                                     | Hood, Amelia<br>PhD Student<br>Department of Zoology, University of Cambridge<br>United Kingdom of Great Britain and Northern Ireland<br>(the) | Hoogesteijn, Almira<br>Researcher and full professor<br>Centro de Investigación y de Estudios Avanzados del IPN<br>Mexico |

|                                                                                                                                      |                                                                                                                                                              |                                                                                                                                |
|--------------------------------------------------------------------------------------------------------------------------------------|--------------------------------------------------------------------------------------------------------------------------------------------------------------|--------------------------------------------------------------------------------------------------------------------------------|
| Hoogmoed, Marinus<br>Pesquisador Colaborador<br>Museu Paraense Emilio Goeldi<br>Brazil                                               | Hooper, Sam<br>Faculty Research Assistant<br>Oregon State University, College of Earth, Ocean, and<br>Atmospheric Sciences<br>United States of America (the) | Hoopes, Martha<br>Professor of Biological Sciences<br>Mount Holyoke College<br>United States of America (the)                  |
| Hoover, Jeff<br>Avian Ecologist<br>University of Illinois<br>United States of America (the)                                          | Hope, Geoffrey<br>Professor emeritus<br>Australian National University<br>Australia                                                                          | Hopkins, Ashley<br>Senior Assistant Director, Student Success/Instructor<br>Miami University<br>United States of America (the) |
| Hopkins, Debbie<br>Geography<br>University of Oxford<br>United Kingdom of Great Britain and Northern Ireland<br>(the)                | Hopkins, Frances<br>Marine biogeochemist<br>Plymouth Marine Laboratory<br>United Kingdom of Great Britain and Northern Ireland<br>(the)                      | Hoppema, Mario<br>Alfred Wegener Institute, Bremerhaven<br>Germany                                                             |
| Hopper AC, Stephen D.<br>Professor of Biodiversity<br>The University of western Australia<br>Australia                               | Hopping, Kelly<br>Postdoctoral researcher<br>Stanford University<br>United States of America (the)                                                           | Hopwood, Jennifer<br>Conservation Biologist<br>Xerces Society for Invertebrate Conservation<br>United States of America (the)  |
| Horaeb, Richard<br>Senior Fisheries Biologist<br>National Marine Information & Research Centre, Ministry<br>of Fisheries<br>Namibia  | Horecka, Maria<br>Algology, Hydrobiology<br>Slovak Limnology society<br>Slovakia                                                                             | Horejsi, Dr. Brian<br>Wildlife Ecologist / activist<br>Speak Up For Wildlife Foundation<br>Canada                              |
| Horemans, Benjamin<br>Environmental Microbiology<br>KU Leuven<br>Belgium                                                             | Horn, Myriel<br>PhD Student / Physical Oceanography<br>Alfred Wegener Institute for Polar and Marine Research<br>Germany                                     | Hornburg, Philipp<br>PhD Student Structural Biology<br>European Molecular Biology Laboratory (EMBL)<br>Germany                 |
| Horne, Curtis<br>Postdoctoral Researcher<br>University of Liverpool<br>United Kingdom of Great Britain and Northern Ireland<br>(the) | Horne, John<br>Postdoctoral researcher<br>Dalhousie University<br>Canada                                                                                     | Horreo, Jose Luis<br>National Museum of Natural Sciences (CSIC)<br>Spain                                                       |
| Horrocks, Julia<br>Professor of Conservation Ecology<br>University of the West Indies<br>Barbados                                    | Horta, Paulo<br>Professor<br>Federal University of Santa Catarina<br>Brazil                                                                                  | Hortal, Joaquín<br>Tenured Scientist<br>Museo Nacional de Ciencias Naturales (MNCN-CSIC)<br>Spain                              |

|                                                                                                                                                                                                           |                                                                                                                                                                          |                                                                                                                                                |
|-----------------------------------------------------------------------------------------------------------------------------------------------------------------------------------------------------------|--------------------------------------------------------------------------------------------------------------------------------------------------------------------------|------------------------------------------------------------------------------------------------------------------------------------------------|
| Hortal, Sara<br>Microbial Ecology<br>Western Sydney University, Hawkesbury Institute for the Environment<br>Australia                                                                                     | Hortas, Francisco<br>Assistant Lecturer<br>Department of Biology, Cádiz University<br>Spain                                                                              | Hortle, Kent<br>Adjunct Research Fellow<br>Charles Sturt University<br>Australia                                                               |
| Horton, John<br>Global Public Health<br>United Kingdom of Great Britain and Northern Ireland (the)                                                                                                        | Horton, Tammy<br>Research Scientist, taxonomy & biodiversity<br>National Oceanography Centre, Southampton<br>United Kingdom of Great Britain and Northern Ireland (the)  | Horvath, Rita *<br>Biodiversity expert<br>Hungary                                                                                              |
| Horváth, Anna<br>Researcher / Conservation Biology, small mammals<br>Instituto Montebello, Centro Interdisciplinario para el Fomento del Desarrollo Integral de la Frontera Sur de México, A.C.<br>Mexico | Horváth, Ferenc<br>forest ecology<br>Centre for Ecology, Hungarian Academy of Sciences<br>Hungary                                                                        | Hosken, David<br>Professor<br>University of Exeter<br>United Kingdom of Great Britain and Northern Ireland (the)                               |
| Hosking, Gordon<br>Forest Entomologist<br>NZ Forest Research Institute (Retired)<br>New Zealand                                                                                                           | Hosking, Rob<br>General Medical Practitioner<br>Australia                                                                                                                | Hoskisson, Paul<br>Reader in Molecular Microbiology<br>University of Strathclyde<br>United Kingdom of Great Britain and Northern Ireland (the) |
| Hossain, Md Muzammel<br>PhD student<br>Huazhong Agricultural University<br>China                                                                                                                          | Hossie, Thomas<br>Postdoctoral fellow - Biological Sciences<br>Trent University<br>Canada                                                                                | Hostim-Silva, Mauricio *<br>Professor/Ichthyology<br>Universidade Federal do Espirito Santo<br>Brazil                                          |
| Houde, Peter<br>Professor of Biology<br>New Mexico State University<br>United States of America (the)                                                                                                     | Houehanou, Thierry<br>Lecturer-Researcher/Conservation of plant biodiversity<br>Faculty of Agronomy, University of Parakou<br>Benin                                      | Houessou, Laurent Gbenato *<br>Lecturer<br>National School of Wildlife and Park Management,<br>University of Parakou (Benin Republic)<br>Benin |
| Hough, Moira<br>PhD Candidate, Ecology & Evolutionary Biology<br>University of Arizona<br>United States of America (the)                                                                                  | Hough-Snee, Nathaniel<br>Research Ecologist<br>Meadow Run Environmental LLC<br>United States of America (the)                                                            | Houle, Carolyne<br>MSc Student/Ecology<br>Université de Sherbrooke<br>Canada                                                                   |
| Houngnon, Alfred *<br>Management and conservation of remnant forests in Benin Republic<br>Laboratoire d'Ecologie, de Botanique et de Biologie Végétale<br>Benin                                           | Houpert, Loic<br>Postdoctoral Scientist / Physical Oceanography<br>Scottish Association for Marine Science<br>United Kingdom of Great Britain and Northern Ireland (the) | HOURS, Martine<br>SEnior Researcher, epidemiologist<br>IFSTTAR<br>France                                                                       |



|                                                                                                                                                  |                                                                                                                                                               |                                                                                                                                  |
|--------------------------------------------------------------------------------------------------------------------------------------------------|---------------------------------------------------------------------------------------------------------------------------------------------------------------|----------------------------------------------------------------------------------------------------------------------------------|
| House, Jenny<br>Field Scientist, Marine Conservation<br>Blue Ventures<br>Timor-Leste                                                             | Houslay, Thomas<br>Research Fellow<br>University of Exeter<br>United Kingdom of Great Britain and Northern Ireland<br>(the)                                   | Howard, Edward<br>Aquarium Manager BSc in Marine Biology<br>Island Bay Marine Education Centre<br>New Zealand                    |
| Howard, Jerome<br>Professor of Biology<br>University of New Orleans<br>United States of America (the)                                            | Howard, Richard<br>Professor Emeritus of Biology<br>Purdue University<br>United States of America (the)                                                       | Howarth, Stephanie<br>Post Doctoral Researcher<br>Macquarie University<br>Australia                                              |
| Howe, Kristy<br>Wildlife Biologist<br>Nevada Natural Heritage Program<br>United States of America (the)                                          | Howey, Christopher<br>Assistant Professor<br>University of Scranton<br>United States of America (the)                                                         | Howison, Ruth<br>Post doctorate ecosystem ecology<br>Groningen Institute for Evolutionary Life Sciences<br>Netherlands (the)     |
| Howley, Christina<br>Environmental Scientist<br>Howley Environmental Consulting<br>Australia                                                     | Høye, Toke<br>Senior scientist<br>Aarhus University<br>Denmark                                                                                                | Hrabik, Robert<br>State Ichthyologist<br>State of Missouri, Conservation Department<br>United States of America (the)            |
| Hrbek, Tomas<br>Associate Professor<br>Federal University of Amazonas<br>Brazil                                                                  | HS, Sushma<br>Adjunct Scientist<br>Salim Ali Centre for Ornithology and Natural History<br>(SACON)<br>India                                                   | Hsu, Tiffany<br>PhD Candidate<br>Harvard University<br>United States of America (the)                                            |
| Hu, Darcy<br>Ecologist<br>United States of America (the)                                                                                         | Huang, Danwei<br>Assistant Professor<br>National University of Singapore<br>Singapore                                                                         | Huang, Xiaolei<br>Professor of entomology<br>Fujian Agriculture and Forestry University, College of<br>Plant Protection<br>China |
| Huang, Ya-Yi<br>Postdoc<br>Academia Sinica<br>Taiwan                                                                                             | Huang, Zhongyun<br>PhD student, plant biology<br>United States of America (the)                                                                               | Huaranca, Juan Carlos<br>Ph.D Student<br>Universidad de Los Lagos<br>Chile                                                       |
| Huba, Mikulas<br>Professor, senior research worker/environmental<br>geographer<br>Institute of Geography, Slovak Academy of Sciences<br>Slovakia | Hubbe, Alex<br>Assistant Professor, Paleontology/Evolutionary Biology<br>Universidade Federal da Bahia<br>Brazil                                              | Hube, Bernhard<br>Microbiologist<br>Jena<br>Germany                                                                              |
| Huber, Bernhard A.<br>Zoologist<br>Zoological Research Museum Alexander Koenig<br>Germany                                                        | Huber, Nikolaus<br>Scientist, DVM, Stress Physiologist<br>Institute for Wildlife Ecology and Evolution, University of<br>Veterinary Science Vienna<br>Austria | Huber, Wolfgang<br>Research Group Leader<br>EMBL - European Molecular Biology Laboratory<br>Germany                              |

|                                                                                                                                                              |                                                                                                                                                                                                                                    |                                                                                                                                |
|--------------------------------------------------------------------------------------------------------------------------------------------------------------|------------------------------------------------------------------------------------------------------------------------------------------------------------------------------------------------------------------------------------|--------------------------------------------------------------------------------------------------------------------------------|
| HUCHET, Jean-Bernard<br>PhD, researcher in Entomology<br>Muséum national d'Histoire naturelle, Paris<br>France                                               | Huck, Thierry<br>research scientist<br>CNRS<br>France                                                                                                                                                                              | Hucke-Gaete, Rodrigo<br>Professor, Dr Sc<br>Universidad Austral de Chile<br>Chile                                              |
| Huckstadt, Luis<br>PostDoctoral Researcher<br>UC Santa Cruz<br>United States of America (the)                                                                | Hudson, John<br>Restoration Biologist<br>Southeast Alaska Watershed Coalition<br>United States of America (the)                                                                                                                    | Hudson, Leone<br>Zoology<br>North-West University<br>South Africa                                                              |
| Hudson, Malcolm<br>Associate Professor; Environmental Sciences<br>University of Southampton<br>United Kingdom of Great Britain and Northern Ireland<br>(the) | Hudson, Patrick<br>Aquatic Ecologist<br>United States Geological Service<br>United States of America (the)                                                                                                                         | Huebner, Diane<br>PhD Candidate, Biology & Wildlife<br>University of Alaska Fairbanks<br>United States of America (the)        |
| Huete-Perez, Jorge<br>Senior Vice President<br>University of Central America<br>Nicaragua                                                                    | Huete-Stauffer, Carla<br>PhD, Postdoc Marine biology and ecology<br>CEAB-CSIC<br>Spain                                                                                                                                             | Hufford, Mary<br>Cultural Sustainability and Environmental Studies<br>Goucher College<br>United States of America (the)        |
| Hufnagel, Johannes<br>Senior Scientist<br>Leibniz Centre for Agricultural Landscape Research (ZALF)<br>Germany                                               | Huft, Michael<br>Systematic Botanist; Editor of The Great Lakes Botanist;<br>Board Member of Flora of North America Association<br>Field Museum of Natural History; Missouri Botanical<br>Garden<br>United States of America (the) | Hugé, Jean<br>Postdoctoral Researcher, Sustainability Science &<br>Systems Ecology<br>Université Libre de Bruxelles<br>Belgium |
| Huggett, Jennifer<br>Research Geologist<br>Petroclays Ltd<br>United Kingdom of Great Britain and Northern Ireland<br>(the)                                   | Hughes, Alice<br>Associate Professor & Group leader/Biodiversity &<br>Conservation<br>Xishuangbanna Tropical Botanical Garden, Chinese<br>Academy of Sciences<br>China                                                             | Hughes, Christi<br>Conservation and Research Specialist<br>South Carolina Aquarium<br>United States of America (the)           |
| Hughes, Dan<br>Research Coordinator<br>Whale Shark and Oceanic Research Centre<br>Honduras                                                                   | Hughes, Dianne<br>Honorary Research Associate<br>The University of Sydney<br>Australia                                                                                                                                             | Hughes, George<br>Zoologist. Former CEO of Nature Conservation<br>Natal Parks Board/Ezemvelo KZN Wildlife<br>South Africa      |
| Hughes, Jocelyne<br>Lecturer, Environmental Science<br>University of Oxford<br>United Kingdom of Great Britain and Northern Ireland<br>(the)                 | Hughes, Karen<br>Professor<br>University of Tennessee<br>United States of America (the)                                                                                                                                            | Hughes, Katie<br>United States of America (the)                                                                                |

|                                                                                                                                    |                                                                                                                                                     |                                                                                                                                                      |
|------------------------------------------------------------------------------------------------------------------------------------|-----------------------------------------------------------------------------------------------------------------------------------------------------|------------------------------------------------------------------------------------------------------------------------------------------------------|
| Hughes, Kevin<br>Environmental Scientist<br>British Antarctic Survey<br>United Kingdom of Great Britain and Northern Ireland (the) | Hughes, Lesley<br>Distinguished Professor of Biology<br>Macquarie University<br>Australia                                                           | Hughes, Michael<br>Senior Lecturer, Environmental Management<br>Murdoch University<br>Australia                                                      |
| Hughey, Lacey<br>Ecology<br>University of California, Santa Barbara<br>United States of America (the)                              | Hugo, Sanet<br>Postdoctoral Fellow, Statistical Ecology<br>South African Institute for Aquatic Biodiversity<br>South Africa                         | Huillet, Thierry<br>CNRS Researcher<br>University of Cergy-Pontoise and CNRS<br>France                                                               |
| Huisman, Robert<br>Instrument scientist<br>SRON Netherlands Institute for Space Research<br>Netherlands (the)                      | Huld, Thomas<br>Scientific Officer<br>European Commission Joint Research Centre<br>Italy                                                            | Hull, Elizabeth<br>Deputy Chair, SOAS Food Studies Centre<br>SOAS University of London<br>United Kingdom of Great Britain and Northern Ireland (the) |
| Hüller, Torsten<br>PhD. crop science<br>Institute for crop science, University of Hohenheim<br>Germany                             | Hulme, Philip Eric<br>Professor of Plant Biosecurity<br>Lincoln University<br>New Zealand                                                           | Hulsman, Kees<br>Honorary Research Fellow/ Ecologist<br>Griffith University<br>Australia                                                             |
| Human, Mieke<br>PhD Student<br>University of Pretoria<br>South Africa                                                              | Humanes Schumann, Adriana<br>Postdoctoral Research Associate<br>Newcastle University<br>United Kingdom of Great Britain and Northern Ireland (the)  | Humbatova, Sevinj *<br>Biologist<br>BSU<br>Azerbaijan                                                                                                |
| Humpfer, Jutta<br>Psychologist<br>New Zealand                                                                                      | Humphrey, Bonnie<br>Master of Science (zoology) student<br>University of Canterbury<br>New Zealand                                                  | Humphreys, James<br>Professor of Mathematics & Statistics (retired)<br>University of Massachusetts, Amherst<br>United States of America (the)        |
| Humphreys, William F.<br>Adjunct Professor, School of Biological Sciences<br>University of Western Australia<br>Australia          | Humphries, Hope<br>Research Associate, Ecology<br>Institute of Arctic and Alpine Research, University of Colorado<br>United States of America (the) | Huneman, Philippe<br>Research Director, Philosophy of Science<br>IHPST, CNRS<br>France                                                               |
| Hünemeier, Tábita<br>Professor Genetics and Evolutionary Biology<br>University of São Paulo (USP)<br>Brazil                        | Hung, Chih-Ming *<br>Biodiversity Research Center, Academia Sinica<br>Taiwan                                                                        | Hunt, Carter<br>Assistant Professor of RPTM & Anthropology<br>Penn State University<br>United States of America (the)                                |
| Hunt, Grainger<br>Scientist Emeritus<br>The Peregrine Fund<br>United States of America (the)                                       | Hunt, Hugh<br>Reader in Engineering Dynamics and Vibration<br>University of Cambridge<br>United Kingdom of Great Britain and Northern Ireland (the) | Hunt, Rob<br>Science grad, Natural Resource Manager<br>Independent<br>Australia                                                                      |

|                                                                                                                        |                                                                                                                                                                                   |                                                                                                                                           |
|------------------------------------------------------------------------------------------------------------------------|-----------------------------------------------------------------------------------------------------------------------------------------------------------------------------------|-------------------------------------------------------------------------------------------------------------------------------------------|
| Hunter, Cynthia<br>Associate Professor, Biology<br>University of Hawaii<br>United States of America (the)              | Hunter, David<br>Locust and Grasshopper Control<br>Australia                                                                                                                      | Hunter, Luke<br>President & Chief Conservation Officer<br>Panthera<br>United States of America (the)                                      |
| Hunter, Malcolm<br>Libra Professor of Conservation Biology<br>University of Maine<br>United States of America (the)    | Hurford, Anthony<br>Water Resources Management<br>University of Manchester<br>United Kingdom of Great Britain and Northern Ireland (the)                                          | Hurstel, Arnaud<br>Independant researcher<br>Observatoire des Carnivores Sauvages (OCS)<br>France                                         |
| Hurtado, Ana Belén<br>Colombia                                                                                         | Hurtado, Isabel<br>Biologist<br>Aquatec-SUEZ<br>Spain                                                                                                                             | Hurtado, Natali<br>Research<br>Universidad Austral de Chile<br>Chile                                                                      |
| Hurtado McCormick, Valentina<br>PhD Candidate/Marine Microbial Ecology<br>University of Technology Sydney<br>Australia | Hurth, Victoria<br>Associate Professor Marketing and Sustainable Business<br>University of Plymouth<br>United Kingdom of Great Britain and Northern Ireland (the)                 | Husic, Diane<br>Dean, School of Natural and Health Sciences<br>Moravian College<br>United States of America (the)                         |
| HUSSAIN, SHAH *<br>Ecologist / Wildlife Ecology<br>DELHI UNIVERSITY<br>India                                           | Hussey, Charles<br>Retired taxonomist and biodiversity informatics specialist<br>The Natural History Museum, London<br>United Kingdom of Great Britain and Northern Ireland (the) | Hutchings, Roger<br>Research Scientist<br>INPA - Instituto Nacional de Pesquisas da Amazônia<br>Brazil                                    |
| Hutton, Keryn *<br>Agricultural Genetics<br>ABRI<br>Australia                                                          | Huybrechts, Michiel<br>PhD student<br>Centre for environmental sciences<br>Belgium                                                                                                | Huys, Anne-Catherine<br>Doctor and Neuroscientist<br>University College London, UK, but originally from<br>Liechtenstein<br>Liechtenstein |
| Huysamer, Anton<br>Masters Student<br>Stellenbosch University<br>South Africa                                          | Huyse, Tine<br>Biologist<br>Royal museum for Central Africa<br>Belgium                                                                                                            | Hvenegaard, Glen<br>Professor, Environmental Science<br>University of Alberta<br>Canada                                                   |
| Hyatt, Kim<br>Fisheries Research Scientist<br>Fisheries and Oceans Canada<br>Canada                                    | Hyde, Julian<br>General Manager<br>Reef Check Malaysia<br>Malaysia                                                                                                                | Hyman, Amanda<br>Fisheries and Wildlife<br>Oregon State University<br>United States of America (the)                                      |

|                                                                                                                                                |                                                                                                                         |                                                                                                                                            |
|------------------------------------------------------------------------------------------------------------------------------------------------|-------------------------------------------------------------------------------------------------------------------------|--------------------------------------------------------------------------------------------------------------------------------------------|
| Iacarella, Josephine<br>Postdoctoral Fellow<br>Fisheries and Oceans Canada<br>Canada                                                           | Iacolina, Laura<br>Conservation Genetics/Genomics<br>Italy                                                              | Iaffa, Diego *<br>Geologist<br>Argentina                                                                                                   |
| Ibanez, Thomas<br>Forest ecology<br>Institut Agronomique néo-Calédonien<br>New Caledonia                                                       | Ibañez, Soledad<br>Academic<br>Universidad Adventista de Chile<br>Chile                                                 | Ibarguchi, Gabriela<br>Conservation Program Manager<br>San Diego Zoo Institute for Conservation Research<br>United States of America (the) |
| Ibarra, José Tomás<br>Assistant Professor<br>Villarrica Campus, Pontificia Universidad Católica de Chile<br>Chile                              | Ibarra-Cerdeña, Carlos N.<br>Professor<br>Departamento de Ecología Humana, Cinvestav Unidad Mérida<br>Mexico            | Ibarra-Manríquez, Guillermo<br>Researcher/Taxonomist-Ecologist<br>Universidad Nacional Autónoma de México<br>Mexico                        |
| Ibelings, Bas<br>Professor in Microbial Ecology<br>University of Geneva<br>Switzerland                                                         | Ibrahim, Kamate *<br>Water sanitation<br>International Institute of water and environment 2IE<br>Burkina Faso           | Ibrahim Uehbe de Oliveira, Marla<br>Professor of Botany<br>Sergipe Federal University (Universidade Federal de Sergipe-UFS)<br>Brazil      |
| Ibrahimi, Halil *<br>Professor of Animal Ecology<br>University of Prishtina<br>Albania                                                         | Ibsen, Timo<br>Archaeology<br>Center for Baltic and Scandinavian Archaeology Schleswig<br>Germany                       | Ichang'i, Daniel<br>Chairman, Department of Geology<br>University of Nairobi<br>Kenya                                                      |
| Iddings, Kelli<br>Master of Environmental Management<br>Duke University<br>United States of America (the)                                      | Idohou, Rodrigue *<br>Head of research Unit<br>Laboratoire de Biomathématiques et d'Estimations Forestières<br>Benin    | Igarza, Maricarmen<br>PhD Student<br>University of Oldenburg, Germany<br>Peru                                                              |
| Iglesias, Gregorio<br>Professor of Coastal Engineering<br>University of Plymouth<br>United Kingdom of Great Britain and Northern Ireland (the) | Iglesias-Prieto, Roberto<br>Professor of Biology<br>The Pennsylvania State University<br>United States of America (the) | Ignatchenko, Alexandr<br>Bioinformatition<br>EMBL-EBI<br>United Kingdom of Great Britain and Northern Ireland (the)                        |
| Igne Rocha, Fernando<br>Student/ PhD Soil Science<br>Federal Rural University of Rio de Janeiro<br>Brazil                                      | Igos, Elorri<br>Researcher in Life Cycle Assessment field<br>Luxembourg                                                 | Iguatemy, Mariana<br>Pos Doctoral student<br>Consejo Superior de Investigaciones Cientificas<br>Brazil                                     |

|                                                                                                                                    |                                                                                                                                        |                                                                                                                                             |
|------------------------------------------------------------------------------------------------------------------------------------|----------------------------------------------------------------------------------------------------------------------------------------|---------------------------------------------------------------------------------------------------------------------------------------------|
| Ikin, Karen<br>Research Fellow, Conservation and Landscape Ecology<br>The Australian National University<br>Australia              | Ikyo, Achakpa *<br>Physics<br>Benue State University Makurdi<br>Nigeria                                                                | Ilany, Amiyaal<br>Senior Lecturer<br>Bar Ilan University<br>Israel                                                                          |
| Iler, Amy<br>Conservation Scientist & Ecologist<br>Chicago Botanic Garden<br>United States of America (the)                        | Iles, Alison<br>Ecologist<br>Oregon State University<br>United States of America (the)                                                 | Ilieva, Mihaela<br>Assoc. prof. / Ecology<br>Institute of Biodiversity and Ecosystem Research,<br>Bulgarian Academy of Sciences<br>Bulgaria |
| Iliffe, Thomas<br>Professor<br>Texas A&M University<br>United States of America (the)                                              | Iliopoulos, Yorgos<br>Wildlife Biology PhD<br>Greece                                                                                   | Illescas Monterroso, Carlos Manuel<br>Carcinólogo<br>Instituto de >Ciencias del Mar y Limnología, UNAM<br>Mexico                            |
| Ilyushkin, Sergey<br>Research Assistant Professor, Physics<br>Colorado School of Mines<br>United States of America (the)           | Ilyushkina, Irina<br>Marine Biology<br>Victoria University of Wellington<br>New Zealand                                                | Imaz, Mireya *<br>Professor<br>UNAM<br>Mexico                                                                                               |
| Imeri, Alma *<br>Lecture<br>Agricultural University of Tirana<br>Albania                                                           | Immak, Joy<br>Ph.D. Candidate<br>University of Nevada, Las Vegas<br>United States of America (the)                                     | Imperatriz Fonseca, Vera Lucia<br>Sênior Professor Ecology<br>São Paulo University<br>Brazil                                                |
| Imperio, Simona<br>Researcher in Ecology<br>National Research Council of Italy<br>Italy                                            | Inaba, Kazuo *<br>Professor/Director<br>Shimoda Marine Research Center, University of Tsukuba<br>Japan                                 | Iñarritu, Begoña<br>UNAM<br>Mexico                                                                                                          |
| Indelicato, Claire<br>Graduate student in Biology<br>ENS Lyon<br>France                                                            | Indreica, Adrian<br>Assoc. Prof. Dr., Geobotany, Vegetation Mapping<br>Transilvania University of Brasov, Dep. Silviculture<br>Romania | Ingels, Jeroen<br>Research Faculty<br>Florida State University<br>United States of America (the)                                            |
| Ingeman, Kurt<br>Postdoctoral Scholar, Marine Ecology<br>University of California, Santa Barbara<br>United States of America (the) | Inger, Richard<br>Research Fellow<br>University of Exeter<br>United Kingdom of Great Britain and Northern Ireland<br>(the)             | Ingleby, Sandy<br>Collection Manager Mammals<br>Australian Museum<br>Australia                                                              |
| Inglez, Mariana<br>PhD Student in Bioanthropology<br>Universidade de São Paulo<br>Brazil                                           | INGOLE, BABAN *<br>Chief Scientist / Marine Ecology<br>CSIR-NATIONAL INSTITUTE OF OCEANOGRAPHY<br>India                                | Ingram, Krista<br>Professor of Biology<br>Colgate University<br>United States of America (the)                                              |

|                                                                                                                             |                                                                                                                                                                |                                                                                                                                            |
|-----------------------------------------------------------------------------------------------------------------------------|----------------------------------------------------------------------------------------------------------------------------------------------------------------|--------------------------------------------------------------------------------------------------------------------------------------------|
| Ingrid Guimarães de Alencar, Mery *                                                                                         | Ingrisch, Sigfrid<br>Biodiversity Informatics<br>Zoologisches Forschungsmuseum Alexander Koenig -<br>Leibniz-Institut für Biodiversität der Tiere -<br>Germany | Iñiguez-Dávalos, Luis I.<br>Full Time Preffesor-Researcher, wildlife ecology and<br>conservation<br>University of Guadalajara<br>Mexico    |
| Inogwabini, Bila-Isia<br>Ecologist<br>CERED/The Jesuit Loyola University of Congo<br>Congo (the Democratic Republic of the) | Inouye, David *<br>Professor Emeritus / ecology<br>University of Maryland<br>United States of America (the)                                                    | Insarov, Gregory<br>Leading research scientist<br>Institute of Geography of the Russian Academy of<br>Sciences<br>Russian Federation (the) |
| Intan, Mariana<br>Marine Biologist<br>Surya University<br>Indonesia                                                         | Invik, Rosemary<br>Canada                                                                                                                                      | Iporac, Lowell Andrew<br>Ph.D Student<br>Florida International University<br>United States of America (the)                                |
| Ippolito, Antonio<br>Full professor<br>Dept. of Soil, Plant and Food Science<br>Italy                                       | Irabien, Angel<br>Professor Chemical Engineering<br>Universidad de Cantabria<br>Spain                                                                          | Iranzo, Esperanza<br>postdoctoral researcher<br>Consejo Nacional de Investigaciones Científicas y<br>Técnicas (CONICET)<br>Argentina       |
| Irastorza-Azcarate, Ibai<br>Bioinformatician<br>CABD Pablo de Olavide university<br>Spain                                   | ireland, david<br>biomedical<br>CSIRO<br>Australia                                                                                                             | Iriarte, Agustin<br>Biologist<br>Flora & Fauna Chile Limited<br>Chile                                                                      |
| Iriondo, Jose<br>Full Professor / Plant Ecology<br>Universidad Rey Juan Carlos<br>Spain                                     | Iriondo de Hond, Maite<br>PhD Student<br>IMIDRA<br>Spain                                                                                                       | Iriondo-DeHond, Amaia<br>PhD Student in Food Science<br>Food Science Research Center (CIAL), CSIC<br>Spain                                 |
| Irisari, Iker<br>Postdoctoral researcher<br>Uppsala University<br>Sweden                                                    | Irish, Frances<br>Associate Professor of Biological Sciences<br>Moravian College<br>United States of America (the)                                             | Irish, John<br>Entomologist<br>Namibia                                                                                                     |
| Irl, Severin<br>Assistant Professor<br>Biogeography, University of Bayreuth<br>Germany                                      | Irons, Jessica<br>Psychology<br>The Ohio State University<br>United States of America (the)                                                                    | Irvine, Kenneth<br>Chair of Aquatic Ecosystems<br>IHE Delft<br>Netherlands (the)                                                           |
| Irving, Katie<br>PhD Candidate<br>IGB - Leibniz Institute for Freshwater Ecology and Inland<br>Fisheries<br>Germany         | Isabel, Liberal<br>PhD<br>CSIC<br>Spain                                                                                                                        | isabelle, CHIVILO<br>medecine<br>France                                                                                                    |

|                                                                                                                                                                                          |                                                                                                                              |                                                                                                                                                                                                                                  |
|------------------------------------------------------------------------------------------------------------------------------------------------------------------------------------------|------------------------------------------------------------------------------------------------------------------------------|----------------------------------------------------------------------------------------------------------------------------------------------------------------------------------------------------------------------------------|
| Isacch, Juan<br>Dr. Natural Sciences, Research Staff CONICET<br>Instituto de Investigaciones Marinas y Costeras (IIMyC),<br>CONICET - Universidad Nacional de Mar del Plata<br>Argentina | Isaias, Rosy<br>Full Professor<br>Universidade Federal de Minas Gerais<br>Brazil                                             | Isaza, Carolina<br>Professor / Biology<br>Universidad Militar Nueva Granada<br>Colombia                                                                                                                                          |
| Isaza-López, Lina Marcela *<br>Biology<br>Isaza-López<br>Colombia                                                                                                                        | Isernhagen, Ingo<br>Biologist, Ecological Restoration Researcher<br>Embrapa<br>Brazil                                        | Ishida, Yoko<br>Post Doctoral Fellow<br>James Cook University<br>Australia                                                                                                                                                       |
| Ishihara, Hajime<br>CEO<br>W&I Associates Corporation<br>Japan                                                                                                                           | Isidorova, Anastasija<br>PhD student/ Limnology<br>Uppsala University<br>Sweden                                              | Isla, Enrique<br>Researcher/Marine Biochemistry<br>Instituto de Ciencias del Mar-CSIC<br>Spain                                                                                                                                   |
| Islam, M. Zahirul<br>Biologist<br>Wilderness Conservation<br>Bangladesh                                                                                                                  | Islam, Mohammad *<br>Biologist<br>Marinelife Alliance<br>Bangladesh                                                          | Islas, Camila<br>Doctorate student<br>University of Campinas<br>Brazil                                                                                                                                                           |
| Islas, Tania<br>Académico. Biología Celular y Molecular de Plantas y<br>Organismos Marinos<br>UASA-ICMyL-UNAM<br>Mexico                                                                  | Issberner, Liz-Rejane<br>Researcher/Political Ecology<br>Brazilian Institute in Science and Technology Information<br>Brazil | ISSELIN-NONDEDEU, Francis<br>Associate Professor<br>Université François Rabelais, Département<br>Aménagement Environnement, Ecole Polytechnique<br>Tours, UMR CNRS CITERES, et UMR IMBE CNRS IRD<br>Université Avignon<br>France |
| Ito, Emi<br>Professor, Earth Sciences<br>University of Minnesota<br>United States of America (the)                                                                                       | Iturralde, Gabriel<br>UDLA<br>Ecuador                                                                                        | Ivanauskas, Natalia<br>Researcher<br>Instituto Florestal<br>Brazil                                                                                                                                                               |
| Ivanenko, Viatcheslav *<br>Leading researcher<br>Department of Invertebrate Zoology Biological Faculty,<br>Lomonosov Moscow State University<br>Russian Federation (the)                 | Ivanova, Ielyzaveta<br>Honours student<br>University of the Witwatersrand<br>South Africa                                    | Ivanova, Silviya V.<br>Environmental Science<br>GLIER, University of Windsor<br>Canada                                                                                                                                           |
| Iverson, John<br>Biology Research Professor<br>Earlhm College<br>United States of America (the)                                                                                          | iverson, wendy<br>Registered Nurse<br>UCSF, Marin General Hospital<br>United States of America (the)                         | Ivory, Jami<br>Faculty Research Assistant<br>Oregon State University<br>United States of America (the)                                                                                                                           |



|                                                                                                                                  |                                                                                                                                                |                                                                                                                                               |
|----------------------------------------------------------------------------------------------------------------------------------|------------------------------------------------------------------------------------------------------------------------------------------------|-----------------------------------------------------------------------------------------------------------------------------------------------|
| Ivy, Catherine<br>PhD Candidate Animal Physiology<br>McMaster University<br>Canada                                               | Iwama, Gabriela<br>Psychology<br>Brazil                                                                                                        | Iwamura, Takuya<br>Senior Lecturer<br>Tel Aviv University<br>Israel                                                                           |
| Iwashita, Adhann<br>Curriculum Developer/RISE (NIH)<br>University of Hawai'i at Hilo<br>United States of America (the)           | Iyer, Ravi<br>Molecular biologist<br>OHSU<br>United States of America (the)                                                                    | Izidio, Geison<br>Professor<br>UFSC<br>Brazil                                                                                                 |
| Izquierdo López, Alejandro<br>Masters in Evolution, Ecology and Systematics<br>Ludwig-Maximilians Universität München<br>Germany | Izquieta-Rojano, Sheila<br>Postdoctoral researcher / Environmental scientist<br>Universidad de Navarra<br>Spain                                | Jaafar, Zeehan<br>Marine Biologist<br>National University of Singapore<br>Singapore                                                           |
| Jablonicky, Caroline<br>Staff Scientist<br>UCSB<br>United States of America (the)                                                | Jacic, Ljubomir<br>Professor of Automation and Control Engineering<br>Technical College Pozarevac<br>Serbia                                    | Jacka, Jerry<br>Environmental Anthropology<br>University of Colorado Boulder<br>United States of America (the)                                |
| Jackson, Grahame<br>Chair PestNet / Plant Protection<br>PestNet<br>Australia                                                     | Jackson, Hannah<br>PhD Student, Evolutionary Biology<br>University of Nottingham<br>United Kingdom of Great Britain and Northern Ireland (the) | Jackson, Jennifer<br>Oceanographer<br>Hakai Institute<br>Canada                                                                               |
| Jackson, Micha<br>PhD candidate<br>University of Queensland<br>Australia                                                         | Jackson, Michelle<br>Research Associate / Ecologist<br>Imperial College London<br>United Kingdom of Great Britain and Northern Ireland (the)   | Jackson, Paul<br>Environmental Studies & Chemistry<br>St. Olaf College<br>United States of America (the)                                      |
| Jackson, Peter<br>Professor, Atmospheric Science<br>University of Northern British Columbia<br>Canada                            | Jackson, Randall<br>Professor of Grassland Ecology<br>University of Wisconsin-Madison<br>United States of America (the)                        | Jackson, Tobias<br>PhD student<br>University of Oxford<br>United Kingdom of Great Britain and Northern Ireland (the)                          |
| Jackson III, Lauren<br>PhD fellow<br>University of Minnesota<br>United States of America (the)                                   | Jacob, Aerin<br>Conservation Scientist<br>Yellowstone to Yukon Conservation Initiative<br>Canada                                               | Jacob, Jens<br>Wildlife Biologist<br>JKI<br>Germany                                                                                           |
| JACOBI, Pedro Roberto<br>Full Professor<br>Institute of Energy and Environment- University of Sao Paulo<br>Brazil                | Jacobs, Ilf<br>Research<br>Natuurpunt<br>Belgium                                                                                               | Jacobsen, Henrik<br>Postdoc in condensed matter physics<br>University of Oxford<br>United Kingdom of Great Britain and Northern Ireland (the) |

|                                                                                                                           |                                                                                                                                                                              |                                                                                                                                                                  |
|---------------------------------------------------------------------------------------------------------------------------|------------------------------------------------------------------------------------------------------------------------------------------------------------------------------|------------------------------------------------------------------------------------------------------------------------------------------------------------------|
| Jacobsen, Kim<br>Economic valuation<br>University of Oxford<br>United Kingdom of Great Britain and Northern Ireland (the) | Jacobson, Andrew<br>PhD in Conservation Biology<br>Duke University<br>United States of America (the)                                                                         | Jacomel Junior, Nelson<br>Agronomist<br>NJ A. Negocios Ltda<br>Brazil                                                                                            |
| Jacques, Helene<br>Veterinary surgeon<br>IUCN Otter specialist Group<br>France                                            | Jacquez, Geoffrey<br>Professor of Geography and President, BioMedware<br>University at Buffalo, BioMedware, and The University of Michigan<br>United States of America (the) | Jactel, Herve<br>Senior scientist in forest ecology and biodiversity<br>National Institute for Agricultural Research (INRA)<br>France                            |
| Jaeger, Audrey<br>Associate Professor<br>Université de La Réunion - UMR ENTROPIE<br>Réunion                               | Jaeger, Jochen A.G.<br>Associate Professor in Geography, Planning and Environment<br>Concordia University Montreal<br>Canada                                                 | Jaén Molina, Ruth<br>Researcher at Department of Molecular Biodiversity & DNA Bank<br>Jardin Botanico Canario "Viera y Clavijo"-Unidad Asociada al CSIC<br>Spain |
| Jaenicke, Hannah<br>Senior Scientist, Agriculture<br>Bonn University, Centre for Development Research (ZEF)<br>Germany    | Jaffré, Mikaël<br>PhD Ecology<br>Université du Québec à Rimouski<br>Canada                                                                                                   | Jagatap, Harini<br>PhD Student/Zoology<br>University of Johannesburg, Centre for Ecological Genomics & Wildlife Conservation<br>South Africa                     |
| Jagoš, Pavel<br>Student<br>Mendelu<br>Czech Republic (the)                                                                | Jahn, Alex<br>Biologist<br>Smithsonian Institution<br>United States of America (the)                                                                                         | Jähmig, Sonja C.<br>Research group leader / Freshwater Science<br>Leibniz-Institute of Freshwater Ecology and Inland Fisheries (IGB)<br>Germany                  |
| Jahren, Torfinn<br>PhD Candidate<br>Inland Norway University of Applied Sciences<br>Norway                                | Jahyny, Benoit<br>Professor of zoology and phylogenetic systematics<br>Universidade Federal do Vale do São Francisco - UNIVASF<br>Brazil                                     | Jaillard, Benoît<br>Scientific researcher<br>Institut National de la Recherche Agronomique<br>France                                                             |
| Jaillet, Benjamin<br>Software development<br>INRA<br>France                                                               | Jaimez Tarifa, Mariano<br>PhD Student<br>University of Málaga & Technical University of Munich<br>Spain                                                                      | Jakop, Ulrike<br>Germany                                                                                                                                         |
| Jalali, Mohammad S.<br>Research Faculty<br>Massachusetts Institute of Technology<br>United States of America (the)        | Jamelli, Davi<br>PhD student<br>Universidade Federal de Pernambuco<br>Brazil                                                                                                 | James, Allan<br>Professor of Geography<br>University of South Carolina<br>United States of America (the)                                                         |

|                                                                                                                                          |                                                                                                                                 |                                                                                                                                           |
|------------------------------------------------------------------------------------------------------------------------------------------|---------------------------------------------------------------------------------------------------------------------------------|-------------------------------------------------------------------------------------------------------------------------------------------|
| James, Dana<br>PhD Student<br>Institute for Resources, Environment and Sustainability at<br>the University of British Columbia<br>Canada | James, Hannah<br>Atmospheric science technician<br>United States of America (the)                                               | James, Nina<br>Environmental Science<br>University of South Australia<br>Australia                                                        |
| James, Paul<br>Professor, Biological Sciences<br>Central Washington University<br>United States of America (the)                         | JAMET, Dominique<br>Professor<br>université de Toulon<br>France                                                                 | JAMET, Jean-Louis<br>Professor / Marine ecology<br>Université de Toulon<br>France                                                         |
| Jami, Fahimeh *<br>University of Pretoria<br>South Africa                                                                                | Jamieson, Catherine<br>Retired<br>ex City of Edinburgh Council<br>United Kingdom of Great Britain and Northern Ireland<br>(the) | Jamieson, Glen *<br>Emeritus Scientist<br>Fisheries and Oceans Canada<br>Canada                                                           |
| Jan, Knorn<br>research assistant - Geography<br>Humboldt-University Berlin<br>Germany                                                    | Janak, James<br>Physics<br>Retired<br>United States of America (the)                                                            | Janc, Anaïs<br>PhD Student, OrcaDepred Project<br>Marine Predator Team - Centre d'Etudes Biologiques de<br>Chizé, UMR-7372 CNRS<br>France |
| Janeau, Jean Louis<br>Hydrologist<br>IRD<br>France                                                                                       | Janes, Holger<br>PhD Candidate - Marine ecosystem services<br>Deakin University<br>Australia                                    | JANG, YIKWEON<br>Professor<br>EWA WOMANS UNIVERSITY<br>Korea (the Republic of)                                                            |
| Jani, Andrea<br>Researcher<br>University of Hawaii at Manoa<br>United States of America (the)                                            | Janion-Scheepers, Charlene<br>Biologist<br>South Africa                                                                         | Janisch, Judith<br>PhD in Behavioural Biology<br>Austria                                                                                  |
| Jann, Cosimo<br>PhD Student<br>Germany                                                                                                   | Jann, Gianna<br>M.Sc. Student Biodiversity and Environmental Education<br>Germany                                               | Janosik, Alexis<br>Marine Biology<br>United States of America (the)                                                                       |
| Janse, Jan H.<br>aquatic ecologist<br>PBL Netherlands Environmental Assessment Agency<br>Netherlands (the)                               | Janse van Rensburg, Johann (Rensie)<br>Manager Rural Enterprise and Economic Development<br>CSIR<br>South Africa                | Jansen, Boris<br>Associate Professor of Soil Chemistry<br>University of Amsterdam<br>Netherlands (the)                                    |
| Jansen, David<br>Research scientist<br>University of Notre Dame<br>United States of America (the)                                        | jansen, henk<br>landscape and home-ecologist<br>Buro Elodea<br>Netherlands (the)                                                | Jansen, Patrick<br>Associate professor<br>Wageningen University & Research<br>Netherlands (the)                                           |

|                                                                                                               |                                                                                                                                                                                        |                                                                                                                                                                       |
|---------------------------------------------------------------------------------------------------------------|----------------------------------------------------------------------------------------------------------------------------------------------------------------------------------------|-----------------------------------------------------------------------------------------------------------------------------------------------------------------------|
| Jansman, Hugh<br>animal ecologist<br>Wageningen Environmental Research (Alterra)<br>Netherlands (the)         | Janssen, Renee<br>Postdoctoral researcher biogeochemistry<br>Max-Planck-Institut für Chemie<br>Germany                                                                                 | Janssens de Bisthoven, Luc<br>Coordinator CEBioS, 'capacities for biodiversity and sustainable development'<br>Royal Belgian Institute of Natural Sciences<br>Belgium |
| Jansson, Janet<br>Scientist<br>Private Citizen<br>United States of America (the)                              | Jansson, Johan<br>Associate Professor in Business Administration and Marketing<br>Lund University School of Economics and Management & Umeå School of Business and Economics<br>Sweden | Jantke, Kerstin<br>Postdoctoral Scientist in Conservation Biology<br>Universität Hamburg<br>Germany                                                                   |
| Jantz, Samuel<br>Faculty specialist<br>University of Maryland, College Park<br>United States of America (the) | Januario, Matheus<br>Msc. Student<br>Universidade de São Paulo<br>Brazil                                                                                                               | Janzen, Daniel<br>Professor of Conservation Biology<br>University of Pennsylvania<br>United States of America (the)                                                   |
| Janzen, Fredric<br>Professor<br>Iowa State University<br>United States of America (the)                       | Janzen, Thijs<br>Postdoctoral Researcher<br>Carl von Ossietzky University, Oldenburg<br>Germany                                                                                        | Jäppinen, Jukka-Pekka<br>Development manager / Biodiversity and Ecosystem Services<br>Finnish Environment Institute (SYKE)<br>Finland                                 |
| JAQUEMET, Sébastien<br>Professor<br>Université de La Réunion, UMR Entropie<br>Réunion                         | Jaquet, Olivier<br>PhD Earth Sciences<br>Switzerland                                                                                                                                   | Jara, Andrea<br>Colombia                                                                                                                                              |
| Jaramillo Torres, Alexander<br>Researcher<br>NMBU<br>Norway                                                   | Jardim Manso, Paulo Roberto *<br>Universidade Federal de Santa Catarina<br>Brazil                                                                                                      | Jarenkow, João André *<br>Biologist, Professor<br>Universidade Federal do Rio Grande do Sul<br>Brazil                                                                 |
| Jaric, Ivan<br>Researcher<br>Leibniz-Institute of Freshwater Ecology and Inland Fisheries, Berlin<br>Germany  | Jarlskog, Cecilia<br>prof. em.<br>Mathematical Physics, Lund University<br>Sweden                                                                                                      | Jarne, Philippe<br>Researcher<br>CEFE, campus CNRS, Montpellier<br>France                                                                                             |
| Järnström, Marie<br>PhD student, Marine Biology<br>Åbo Akademi University<br>Finland                          | Jarvis, Jessie<br>Assistant Professor<br>University of North Carolina Wilmington<br>United States of America (the)                                                                     | Jas, Nathalie<br>Senior Researcher in sociology of risks<br>French National Institute for Agricultural Research<br>France                                             |

|                                                                                                                                                                      |                                                                                                                             |                                                                                                                       |
|----------------------------------------------------------------------------------------------------------------------------------------------------------------------|-----------------------------------------------------------------------------------------------------------------------------|-----------------------------------------------------------------------------------------------------------------------|
| Jashimuddin, Mohammed<br>Professor of Forestry and Environmental Sciences<br>University of Chittagong<br>Bangladesh                                                  | Jasper, William<br>Fisheries Biologist<br>United States of America (the)                                                    | Jasser, Iwona<br>assistant professor / Biology - freshwater ecology<br>University of Warsaw<br>Poland                 |
| Jatavallabhula, Divija<br>MSc Ecology and Evolution<br>Universite de Fribourg<br>Switzerland                                                                         | Jathar, Girish<br>Senior Scientist, Climate Change and Ornithology<br>Bombay Natural History Society<br>India               | Jaud, Thomas *<br>France                                                                                              |
| Jauhiainen, Jyrki<br>Scientist<br>Natural Resources Institute Finland<br>Finland                                                                                     | Jaureguiberry, Pedro<br>Assistant Researcher<br>Instituto Multidisciplinario de Biología Vegetal (CONICET-UNC)<br>Argentina | Javaid, Tasleem<br>PhD Student/ PBIO<br>Ohio University<br>United States of America (the)                             |
| Jayne, Kimberley<br>Animal Behaviour Science<br>United Kingdom of Great Britain and Northern Ireland (the)                                                           | Jeal, Corey<br>Conservation Biologist<br>University of Cape Town<br>South Africa                                            | Jean, Fred<br>Professor Marine Ecology<br>University of Brest / IUEM<br>France                                        |
| Jean-Baptiste, Riou<br>France                                                                                                                                        | Jean-François, Ruault<br>Researcher<br>Irstea<br>France                                                                     | Jean-Jacques, Jaeger<br>Emeritus Professor of Paleontology<br>Université de Poitiers<br>France                        |
| Jean-Luc, Probst *<br>CNRS Researcher<br>ECOLAB, University of Toulouse<br>France                                                                                    | Jean-Marc, Fromentin<br>Researcher in Marine Ecology<br>Ifremer<br>France                                                   | Jean-Marc, Louvet<br>Technician Climate change in Pyrenees mountains forests<br>INRA<br>France                        |
| Jeanmonod, Daniel<br>Honorary curator<br>Conservatoire et jardin botaniques de Genève<br>Switzerland                                                                 | Jeanmougin, Martin<br>PhD Conservation biology<br>Muséum National d'Histoire Naturelle (MNHN)<br>France                     | Jeanne, Richard<br>Consulting Geologist, retired<br>Independent<br>United States of America (the)                     |
| Jeanne, Robert<br>Professor Emeritus of Entomology<br>University of Wisconsin-Madison<br>United States of America (the)                                              | Jeanneret, Philippe<br>Senior Scientist Agroecology<br>Agroscope<br>Switzerland                                             | Jeanniard du Dot, Tiphaine<br>Researcher<br>Canada                                                                    |
| Jedd, Theresa<br>Post-doctoral Researcher in Environmental Policy<br>School of Natural Resources, University of Nebraska - Lincoln<br>United States of America (the) | Jeffery, Kathryn<br>Research Fellow<br>University of Stirling<br>United Kingdom of Great Britain and Northern Ireland (the) | Jeffreys, Rachel<br>Lecturer<br>University of Liverpool<br>United Kingdom of Great Britain and Northern Ireland (the) |

|                                                                                                                                                            |                                                                                                                                               |                                                                                                                                                                             |
|------------------------------------------------------------------------------------------------------------------------------------------------------------|-----------------------------------------------------------------------------------------------------------------------------------------------|-----------------------------------------------------------------------------------------------------------------------------------------------------------------------------|
| Jégou, Laurent<br>Maître de conférences, Geography<br>Université de Toulouse-Jean Jaurès<br>France                                                         | Jehamalar, Eyarin<br>SERB-Young Scientist<br>Zoological Survey of India<br>India                                                              | Jeknić, Zoran<br>Courtesy Faculty, Biotechnology<br>Oregon State University, Department of Horticulture, ALS<br>4017, Corvallis, OR 97331<br>United States of America (the) |
| Jeleapov, Ana<br>Scientific researcher (geography)<br>Institute of Ecology and Geography of Academy of<br>Sciences of Moldova<br>Moldova (the Republic of) | Jeliazkov, Alienor<br>Ecology/Conservation Biology<br>German Centre for Integrative Biodiversity Research (iDiv)<br>Germany                   | Jellinek, Sacha<br>Senior Ecologist<br>LaTrobe University & Greening Australia<br>Australia                                                                                 |
| Jemal, Omarsherif<br>Junior Researcher<br>ZEF, Uni Bonn<br>Ethiopia                                                                                        | Jenkins, Aaron<br>Research Fellow in Planetary Health<br>University of Sydney & Edith Cowan University<br>Australia                           | Jenkins, Arthur<br>Ecology<br>Auburn University<br>United States of America (the)                                                                                           |
| Jenkins, David<br>Professor, Ecology & Biogeography<br>University of Central Florida<br>United States of America (the)                                     | Jenkins, David J A<br>Canada Research Chair<br>Faculty of Medicine, University of Toronto<br>Canada                                           | Jenkins, David John Anthony<br>Canada                                                                                                                                       |
| Jenkins, Jeffrey<br>Assistant Professor of Natural Resource Management<br>University of California, Merced<br>United States of America (the)               | Jenkins, Kelsey<br>Graduate Student - Vertebrate Paleontologist<br>Sam Houston State University<br>United States of America (the)             | Jenkins, Stuart<br>Professor of Marine Ecology<br>Bangor University<br>United Kingdom of Great Britain and Northern Ireland<br>(the)                                        |
| jenkins, Suzanne<br>Ecologist<br>Wet Tropics Healthy Waterways Partnership<br>Australia                                                                    | Jenkinson, Ian R.<br>Researcher, Journal Editor, Consultant / Ocean Science<br>Agency for Consultation and Research in Oceanography<br>France | Jennings, Keith<br>PhD Candidate, Geography<br>University of Colorado Boulder<br>United States of America (the)                                                             |
| Jennings, Philip<br>Emeritus Professor of Physics<br>Murdoch University<br>Australia                                                                       | Jennings, W. Bryan<br>Visiting Professor of Zoology<br>Museu Nacional, Universidade Federal do Rio de Janeiro<br>Brazil                       | Jensen, Frants<br>Postdoc, Marine Biology<br>Aarhus Institute of Advanced Studies<br>Denmark                                                                                |
| Jensen, Jeffrey<br>Professor, OBGYN<br>OHSU<br>United States of America (the)                                                                              | Jensen, Kathe<br>Retired/ marine zoology<br>Natural History Museum of Denmark<br>Denmark                                                      | Jensen, Michael<br>Research scientist - marine biology<br>Ocean Associates<br>United States of America (the)                                                                |

|                                                                                                                                     |                                                                                                                            |                                                                                                                               |
|-------------------------------------------------------------------------------------------------------------------------------------|----------------------------------------------------------------------------------------------------------------------------|-------------------------------------------------------------------------------------------------------------------------------|
| Jentsch, Anke<br>Professor of Disturbance Ecology<br>University of Bayreuth<br>Germany                                              | Jeppesen, Erik<br>Professor, Dsc<br>Aarhus University<br>Denmark                                                           | Jepsen, Jane Uhd<br>Senior Research Scientist<br>Norwegian Institute for Nature Research<br>Norway                            |
| Jerolmack, Colin<br>Chair of Environmental Studies and Associate Professor<br>of Sociology<br>NYU<br>United States of America (the) | Jerome, Mallefet<br>Research associate FNRS/ Marine biology UCL<br>FNRS- National science foundation of Belgium<br>Belgium | Jerschabek Laetz, Elise<br>PhD Student Researcher<br>Zoological Research Museum Koenig<br>Germany                             |
| Jerzy M., Gutowski<br>Professor, Entomology<br>Department of Natural Forests, Forest Research Institute<br>Poland                   | Jesse, Wendy A.M.<br>PhD Candidate - Animal Ecology<br>Vrije Universiteit Amsterdam<br>Netherlands (the)                   | Jesus, Douglas<br>Estudante de Ciências Biológicas<br>Unijuí<br>Brazil                                                        |
| Jesús, Román<br>Full Professor of Inorganic Chemistry<br>Universidad Complutense de Madrid UCM<br>Spain                             | Jewell, Zoe<br>Veterinary Surgeon/Wildlife Conservationist<br>Duke University<br>United States of America (the)            | Jewitt, Debbie<br>Ecosystem Ecologist<br>Ezemvelo KZN Wildlife<br>South Africa                                                |
| Jha, Ashish<br>PhD<br>CSIR-CCMB Hyderabad<br>India                                                                                  | Jha, Rohit<br>Researchers for Wildlife Conservation<br>India                                                               | Jhangeer-Khan, Reshad<br>Rodrigues Manager, Terrestrial and Marine Conservation<br>Mauritian Wildlife Foundation<br>Mauritius |
| Jiang, Yiting<br>phD student<br>China                                                                                               | JIGUET, Frédéric<br>Professor<br>UMR7204 MNHN-CNRS-UPMC, Museum National<br>d'Histoire Naturelle, Paris<br>France          | Jimenez, David<br>Project Officer<br>ULPGC<br>Spain                                                                           |
| Jimenez, Jaime<br>Professor Ecology & Conservation<br>University of North Texas<br>United States of America (the)                   | Jimenez, Paula<br>Academic<br>Universidade Federal de São Paulo<br>Brazil                                                  | Jimenez, Viviana<br>Senior Consultant<br>United Kingdom of Great Britain and Northern Ireland<br>(the)                        |
| Jiménez, Antonio<br>PhD. Researcher<br>National University of Mexico<br>Mexico                                                      | Jiménez Cisneros, Blanca<br>Senior Researcher<br>Institute of Engineering<br>Mexico                                        | Jiménez Monge, Andrés<br>Biologist and Master in Environmental Studies Candidate<br>York University<br>Costa Rica             |
| Jiménez Nieva, Javier<br>Professor<br>Universidad de Huelva<br>Spain                                                                | Jiménez Robles, Octavio<br>Ecology<br>Museo Nacional de Ciencias Naturales (CSIC)<br>Spain                                 | Jimenez Ruiz, Jesus<br>Researcher<br>Inia<br>Spain                                                                            |

|                                                                                                                                  |                                                                                                                                            |                                                                                                                                          |
|----------------------------------------------------------------------------------------------------------------------------------|--------------------------------------------------------------------------------------------------------------------------------------------|------------------------------------------------------------------------------------------------------------------------------------------|
| Jiménez-Morillo, Nicasio Tomás<br>PhD<br>IRNAS-CSIC<br>Spain                                                                     | Jiménez-Navarro, Gerardo<br>PhD<br>CIBIO/InBio/University of Évora<br>Portugal                                                             | Jiménez-Prado, Pedro<br>Profesor<br>Escuela de Gestión Ambiental, Pontificia Universidad Católica del Ecuador Sede Esmeraldas<br>Ecuador |
| Jiménez-Ramos, Rocío<br>Marine Ecology<br>Cádiz University<br>Spain                                                              | Jimeno-Romero, Alba<br>Postdoc fellow in Marine Environmental Research<br>university of the Basque Country<br>Spain                        | Jirmo, Tuqa *<br>Wildlife conservation and management<br>Lewa Wildlife conservancy<br>Kenya                                              |
| Job, Nancy<br>Wetland ecologist<br>University of the Free State<br>South Africa                                                  | Jobin, Anja<br>Wildlife Biology<br>KORA<br>Italy                                                                                           | Jochum, Malte<br>Postdoctoral researcher, Biodiversity and Ecosystem Functioning<br>University of Bern<br>Switzerland                    |
| JOFFRE, Richard<br>Senior Scientist<br>CNRS<br>France                                                                            | Joffroy, Bastian<br>PhD student, Bioengineering<br>TU Dresden<br>Germany                                                                   | Johal, Kiran<br>Ecologist<br>United Kingdom of Great Britain and Northern Ireland (the)                                                  |
| Johannesson, Bo<br>Marine Biologist<br>Department of Marine Sciences, Gothenburg University<br>Sweden                            | Johannesson, Kerstin<br>Professor in Marine Ecology<br>University of Gothenburg<br>Sweden                                                  | Johannsson, Ora<br>Adjunct Professor Zoology, Emeritus Researcher<br>UBC, DFO<br>Canada                                                  |
| Johansson, Maria Ulrika<br>Fire ecologist<br>Stockholm University<br>Sweden                                                      | John, Rosa<br>University of Vienna<br>Austria                                                                                              | Johns, David<br>School of Government<br>Portland State University<br>United States of America (the)                                      |
| Johnsen, Jana<br>Social Work, Retired<br>United States of America (the)                                                          | Johnson, Andrew F<br>Postdoctoral Scholar<br>Scripps Institution of Oceanography<br>United States of America (the)                         | Johnson, Chris<br>Professor of Wildlife Conservation<br>Australia                                                                        |
| Johnson, Christopher<br>Postdoctoral Fellow<br>ETH Zurich<br>Switzerland                                                         | Johnson, Donald<br>Fisheries Scientist/Retired Professor of Biology<br>Libby Creek Watershed Association<br>United States of America (the) | Johnson, E.A.<br>Professor. Biological Sciences<br>University of Calgary<br>Canada                                                       |
| Johnson, Jeff<br>Associate Professor, Dept of Biological Sciences<br>University of North Texas<br>United States of America (the) | Johnson, Kenneth<br>Natural History Museum<br>United Kingdom of Great Britain and Northern Ireland (the)                                   | Johnson, Kersten<br>Writer<br>Community Environmental Education<br>United States of America (the)                                        |



|                                                                                                                                                                |                                                                                                                                                  |                                                                                                                                                       |
|----------------------------------------------------------------------------------------------------------------------------------------------------------------|--------------------------------------------------------------------------------------------------------------------------------------------------|-------------------------------------------------------------------------------------------------------------------------------------------------------|
| Johnson, Melissa<br>Postdoctoral Researcher<br>United States Department of Agriculture<br>United States of America (the)                                       | Johnson, Mireille<br>Researcher Conservation genetics/Human elephant<br>conflict<br>Gabon Biodiversity Program Of Smithsonian Institute<br>Gabon | Johnson, Noor<br>Research Scientist<br>National Snow and Ice Data Center, University of<br>Colorado Boulder<br>United States of America (the)         |
| Johnson, Paul<br>Research fellow Zoology<br>University of Oxford<br>United Kingdom of Great Britain and Northern Ireland<br>(the)                              | Johnson, Peter<br>Research Associate, Botanist, Plant Ecologist<br>Landcare Research NZ<br>New Zealand                                           | Johnson, Robert<br>PhD Candidate in Zoology<br>University of Florida<br>United States of America (the)                                                |
| Johnson, Shannon<br>Associate Professor, Department of Psychology and<br>Neuroscience<br>Dalhousie University<br>Canada                                        | Johnson, Shelly<br>Professor (retired)<br>Pasadena City college<br>United States of America (the)                                                | Johnson, Shelly R<br>Professor Biology Retired<br>Pasadena City College<br>United States of America (the)                                             |
| Johnston, Cora Ann<br>Post-doctoral Researcher in Ecology<br>UCSB<br>United States of America (the)                                                            | Johnston, Emma<br>Professor of Marine Ecology & Dean of Science<br>University of New South Wales<br>Australia                                    | Johnston, Greg<br>Associate Professor<br>South Australian Museum, Flinders University of South<br>Australia & The University of Adelaide<br>Australia |
| Jokinen, Maarit<br>Ecology<br>University of Helsinki<br>Finland                                                                                                | Jolly, Christopher<br>PhD Candidate<br>University of Melbourne<br>Australia                                                                      | Joly, Carlos A.<br>Full Professor Plant Ecology<br>Biology Institute, State University of Campinas/UNICAMP<br>Brazil                                  |
| Joly, François-Xavier<br>Postdoctoral Research Assistant in Ecology<br>University of Stirling<br>United Kingdom of Great Britain and Northern Ireland<br>(the) | Jonak, Claudia<br>Plant molecular biologist<br>Austria                                                                                           | Jonard, Mathieu<br>Associate professor and researcher / forestry - ecology<br>Université catholique de Louvain<br>Belgium                             |
| Jonas-Levi, Adi<br>Biochemistry of food and natural products<br>Tel-Hai College<br>Israel                                                                      | Jonathan, Benito-Sipos<br>Professor of Animal Physiology<br>Universidad Autónoma de Madrid<br>Spain                                              | JONCOUR, Pauline<br>Bioinformatics<br>IGFL<br>France                                                                                                  |
| Jones, Alan *<br>Senior Fellow, Ecologist<br>Australian Museum<br>Australia                                                                                    | Jones, Alice<br>Postdoctoral researcher / marine biology & ecology<br>The University of Adelaide<br>Australia                                    | Jones, Allan<br>Scientific Project and Communications Manager<br>EMBL, Heidelberg<br>Germany                                                          |

|                                                                                                                                                         |                                                                                                                                                             |                                                                                                                                                                        |
|---------------------------------------------------------------------------------------------------------------------------------------------------------|-------------------------------------------------------------------------------------------------------------------------------------------------------------|------------------------------------------------------------------------------------------------------------------------------------------------------------------------|
| Jones, Andrea<br>Biological Anthropology<br>Lawrence Berkeley National Lab<br>United States of America (the)                                            | Jones, Benjamin<br>Research Assistant<br>Cardiff University<br>United Kingdom of Great Britain and Northern Ireland (the)                                   | Jones, Chris<br>Ecologist, visiting researcher at Exeter University<br>Exeter University Cornwall Campus<br>United Kingdom of Great Britain and Northern Ireland (the) |
| Jones, Christopher<br>Professor of Biological Sciences<br>Moravian College<br>United States of America (the)                                            | Jones, Claris<br>Retired Professor of Botany<br>California State University, Fullerton<br>United States of America (the)                                    | Jones, Cynthia<br>Professor of Ecology and Evolutionary Biology<br>University of Connecticut<br>United States of America (the)                                         |
| Jones, Darren<br>Medical science Liaison<br>Novartis Oncology<br>Australia                                                                              | Jones, Darryl<br>Professor of Ecology<br>Griffith University<br>Australia                                                                                   | Jones, Davey<br>Chair of Soil and Environmental Science<br>Bangor University<br>United Kingdom of Great Britain and Northern Ireland (the)                             |
| jones, david<br>Research Associate IV - Vegetation Ecologist<br>Colorado State University<br>United States of America (the)                             | Jones, Eric T. *<br>Anthropology<br>OregonMuse<br>United States of America (the)                                                                            | Jones, F. Andrew<br>Assistant Professor, Department of Botany and Plant Pathology<br>Oregon State University<br>United States of America (the)                         |
| Jones, Glenys<br>Parks Planning & Evaluation /Zoology<br>Government<br>Australia                                                                        | Jones, Hannah<br>Research Project Manager (Environmental Sciences)<br>University of Liverpool<br>United Kingdom of Great Britain and Northern Ireland (the) | Jones, Harrison<br>Doctoral Student<br>University of Florida<br>United States of America (the)                                                                         |
| Jones, Harvey<br>Communications Manager<br>The Institute of European Environmental Policy<br>United Kingdom of Great Britain and Northern Ireland (the) | Jones, Holly<br>Assistant Professor<br>Northern Illinois University<br>United States of America (the)                                                       | Jones, Josh<br>Postdoc River Fragmentation<br>Swansea University<br>United Kingdom of Great Britain and Northern Ireland (the)                                         |
| Jones, Julia PG<br>conservation science<br>Bangor University<br>United Kingdom of Great Britain and Northern Ireland (the)                              | Jones, Kayleigh *<br>United Kingdom of Great Britain and Northern Ireland (the)                                                                             | Jones, Kendall<br>Conservation biology PhD Student<br>University of Queensland<br>Australia                                                                            |
| Jones, Kristal<br>Assistant Research Scientist/Rural Sociologist<br>University of Maryland<br>United States of America (the)                            | Jones, Michael<br>Assistant Professor, School of Public Policy<br>Oregon State University<br>United States of America (the)                                 | Jones, Nicholas<br>Biologist<br>University St Andrews<br>United Kingdom of Great Britain and Northern Ireland (the)                                                    |

|                                                                                                                                                                                                           |                                                                                                                       |                                                                                                                                                         |
|-----------------------------------------------------------------------------------------------------------------------------------------------------------------------------------------------------------|-----------------------------------------------------------------------------------------------------------------------|---------------------------------------------------------------------------------------------------------------------------------------------------------|
| Jones, Penelope<br>Public Health<br>University of Tasmania<br>Australia                                                                                                                                   | Jones, Phil<br>School teacher<br>Taylors College<br>Australia                                                         | Jones, Roger<br>Professorial Research Fellow, Climate Risk<br>Victoria University Melbourne<br>Australia                                                |
| Jones, Roy<br>Emeritus Professor of Geography<br>Curtin University<br>Australia                                                                                                                           | Jones, Sarah<br>Sustainable Development Research Assistant<br>Bioersity International<br>France                       | Jones, Timothy<br>Lecturer<br>Bangor University<br>United Kingdom of Great Britain and Northern Ireland<br>(the)                                        |
| Jones, Wyn<br>Wildlife Ecologist and Artist<br>Formerly with NSW National Parks Service, Forestry<br>Commission of NSW, NSW Department of Agricultur. And<br>as a private consultant to NOWS<br>Australia | Jónsdóttir, Ingibjörg Svava<br>Professor of Ecology<br>University of Iceland<br>Iceland                               | Jonsson, Micael<br>Ecologist (PhD)<br>Umeå University<br>Sweden                                                                                         |
| Jooste, Candice<br>Zoologist (MSc student)<br>University of Johannesburg<br>South Africa                                                                                                                  | Joosten, Hans<br>Professor of Peatland Studies and Palaeoecology<br>Greifswald University<br>Germany                  | Jordaan, Abri<br>Lecturer in music<br>University of Pretoria<br>South Africa                                                                            |
| Jordaan, Adriaan<br>Msc student - Ecology<br>University of the Free State<br>South Africa                                                                                                                 | Jordan, Bryen<br>Associate Professor Neuroscience<br>United States of America (the)                                   | Jordan, Frank<br>Landrieu Distinguished Teaching Professor of Biological<br>Sciences<br>Loyola University New Orleans<br>United States of America (the) |
| Jordan, Sebastian<br>PhD Student<br>Leibniz Institute for Baltic Sea Research Warnemuende<br>Germany                                                                                                      | Jordan, Sylvia<br>Aquatic Ecology<br>Leibniz Institute of Freshwater Ecology and Inland<br>Fisheries (IGB)<br>Germany | Jordan-Dahlgren, Eric *<br>Researcher<br>Universidad Nacional Autnoma de Mexico<br>Mexico                                                               |
| Jordán-Garza, Adán Guillermo<br>Coral Reef Scientist<br>Facultad de Ciencias Biológicas y Agropecuarias, Tuxpan,<br>Universidad Veracruzana<br>Mexico                                                     | Jordano Barbudo, Diego<br>Professor of Ecology<br>Faculty of Sciences, University of Cordoba<br>Sri Lanka             | Jordao, Lucas<br>Biologist<br>Brazil                                                                                                                    |
| Jörgens, Dirk<br>Veterinarian<br>Germany                                                                                                                                                                  | Jørgensbye, Helle<br>PhD student<br>Jørgensbye<br>Denmark                                                             | Jorgensen, Bethany<br>PhD Student, Dept. of Natural Resources<br>Cornell University<br>United States of America (the)                                   |

|                                                                                                                                          |                                                                                                                                                       |                                                                                                                                           |
|------------------------------------------------------------------------------------------------------------------------------------------|-------------------------------------------------------------------------------------------------------------------------------------------------------|-------------------------------------------------------------------------------------------------------------------------------------------|
| Jorissen, Michiel<br>PhD student (Parasitology)<br>Royal Museum for Central Africa and Hasselt University<br>Belgium                     | Josefa, Velasco<br>Ecologist<br>University of Murcia<br>Spain                                                                                         | Joseph, Grant<br>Ecologist and Medical Doctor<br>University of Cape Town<br>South Africa                                                  |
| Joshi, Aditya<br>Head of Conservation Research (wildlife)<br>Wildlife Conservation Trust<br>India                                        | Joshi, Jasmin<br>Professor for Biodiversity Research/Systematic Botany<br>University of Potsdam<br>Germany                                            | Joshi, Srijana<br>Ecosystem Specialist<br>International Centre for Integrated Mountain<br>Development<br>Nepal                            |
| Josselin, CLO<br>PhD student in Evolution and Ecology<br>UMR AGAP<br>France                                                              | Jossie Konoyima, Komba<br>Lecturer<br>Institute of Marine Biology and Oceanography, Fourah<br>Bay College, University of Sierra Leone<br>Sierra Leone | Joubert, Monique<br>Bioinformatitian<br>University of Pretoria<br>South Africa                                                            |
| Joubert-van der Merwe, Lize<br>Conservation Ecology<br>Stellenbosch University<br>South Africa                                           | Jourdain, Elsa<br>Senior researcher<br>INRA<br>France                                                                                                 | JOURDAN, Hervé<br>Researcher in Biological invasions & conservation<br>IRD - Institut de Recherche pour le Développement<br>New Caledonia |
| Journé, Valentin<br>PhD Student<br>INRA<br>France                                                                                        | Jovani, Roger<br>Evolutionary Ecology<br>Estación Biológica de Doñana (C.S.I.C.)<br>Spain                                                             | Jovanović Glavaš, Olga<br>postdoc<br>Department of biology, University of Osijek<br>Croatia                                               |
| Jové, Guillermo<br>Universidad de Valladolid<br>Spain                                                                                    | Joyal, André<br>Professor Emeritus, Mathematics<br>Université du Québec à Montréal (UQAM)<br>Canada                                                   | Joyce, Leah<br>Graduate Student<br>University of Montana<br>United States of America (the)                                                |
| Joyeux, Jean-Christophe<br>Professor, Ichthyology<br>Federal University of Espirito Santo<br>Brazil                                      | Juan José, Bacallado Aránega *<br>Director Museo de Ciencias Naturales de Tenerife<br>Cabildo de Tenerife<br>Spain                                    | Juan José, Pastor Comín *<br>Professor<br>Universidad de Castilla-La Mancha<br>Spain                                                      |
| Juarranz, Angeles<br>Professor of Cell Biology<br>Universidad Autonoma de Madrid<br>Spain                                                | Jucá, Thays<br>Msc Student<br>Instituto Nacional de Pesquisa da Amazônia - INPA<br>Brazil                                                             | Jucker, Tommaso<br>Research Scientist<br>Australia                                                                                        |
| Judas, Jacky<br>Manager & Scientific adviser - Terrestrial biodiversity<br>Emirates Wildlife Society - WWF<br>United Arab Emirates (the) | Juette, Tristan<br>PhD student - Behavioural Ecology<br>University of Quebec in Montreal<br>Canada                                                    | Juffermans, Jan<br>Ecologist<br>Dutch Footprint Group<br>Netherlands (the)                                                                |

|                                                                                                                           |                                                                                                                                                        |                                                                                                                                                                               |
|---------------------------------------------------------------------------------------------------------------------------|--------------------------------------------------------------------------------------------------------------------------------------------------------|-------------------------------------------------------------------------------------------------------------------------------------------------------------------------------|
| Julian, Moennich<br>PhD student<br>University of Bremen<br>Germany                                                        | Juliano, Pablo<br>Principal Research Scientist, Food Process Engineering<br>CSIRO<br>Australia                                                         | Jumeau, Jonathan<br>Road Ecology<br>CNRS<br>France                                                                                                                            |
| Jumman, Ashiel<br>Agricultural Engineer: Researcher<br>South African Sugarcane Research Institute (SASRI)<br>South Africa | Jung, Chuleui<br>Professor<br>Andong National University<br>Korea (the Republic of)                                                                    | Jung, Eunyoung<br>Post-doc<br>University of Bayreuth<br>Korea (the Republic of)                                                                                               |
| Jung, Ferris<br>Research Technician<br>EMBL Genomics Corefacility<br>Germany                                              | Jung, Jean-Luc<br>Molecular Ecologist<br>University of Brest<br>France                                                                                 | Jung, Jong-Kook<br>Post Doctor<br>National Institute of Forest Science<br>Korea (the Republic of)                                                                             |
| Jung, Sascha<br>Research assistant Applied and Molecular Microbiology<br>Technische Universität Berlin<br>Germany         | Junglen, Sandra<br>Group leader / Virology<br>Charite Universitätsmedizin Berlin<br>Germany                                                            | junior, Valdecir<br>Master<br>Brazil                                                                                                                                          |
| Junker, James<br>PhD candidate, Ecology<br>Montana State University<br>United States of America (the)                     | Junoy, Juan<br>Professor/Marine Biology<br>Universidad de Alcalá<br>Spain                                                                              | Junqueira, André<br>Post-doctoral researcher / Ethnoecology, Historical<br>Ecology, Ecology of Agroecosystems<br>International Institute for Sustainability<br>Brazil         |
| Junqueira, Nicia<br>Plant Biotechnology<br>Federal University of Rio de Janeiro<br>Brazil                                 | Junqueira Lima, Ivan<br>Graduate Student<br>National Institute of Amazonian Research<br>Brazil                                                         | junquera Izzo, Thiago<br>Associate Professor<br>Instituto de Biologia - Universidade Federal Mato Grosso<br>Brazil                                                            |
| Jupiter, Stacy<br>Melanesia Regional Director<br>Wildlife Conservation Society<br>Fiji                                    | Juránková, Jana<br>Assistant Professor/Veterinary Parasitology<br>University of Veterinary and Pharmaceutical Sciences<br>Brno<br>Czech Republic (the) | Jurasinski, Gerald<br>Associate Professor, Landscape Ecology<br>University of Rostock<br>Germany                                                                              |
| Jurdak, Raja<br>Distributed Sensing Systems<br>CSIRO<br>Australia                                                         | Jusaitis, Manfred<br>Conservation Biologist<br>Botanic Gardens of South Australia<br>Australia                                                         | Justan, Joahna<br>Research Ornithologist and Certified National Wildlife<br>Federation Habitat Steward<br>Wild Bird Research North Carolina<br>United States of America (the) |

|                                                                                                                                                                        |                                                                                                                                                                                                                                         |                                                                                                                                                                             |
|------------------------------------------------------------------------------------------------------------------------------------------------------------------------|-----------------------------------------------------------------------------------------------------------------------------------------------------------------------------------------------------------------------------------------|-----------------------------------------------------------------------------------------------------------------------------------------------------------------------------|
| <p>Juste, Javier<br/>Assistant Professor<br/>Spanish Research Council EBD-CSIC<br/>Spain</p>                                                                           | <p>Justel, Ana<br/>Associate Professor, Statistics<br/>Universidad Autonoma de Madrid<br/>Spain</p>                                                                                                                                     | <p>Justice, Casey<br/>Fishery Scientist<br/>Columbia River Inter-Tribal Fish Commission<br/>United States of America (the)</p>                                              |
| <p>Justino, Cintia<br/>UNESP/ São José do Rio preto<br/>Brazil</p>                                                                                                     | <p>Juteau, Christy<br/>Registered Professional Biologist<br/>A Rocha Canada<br/>Canada</p>                                                                                                                                              | <p>K, ATHIRA<br/>PhD Scholar<br/>Indian Institute of Information Technology and<br/>Management- Kerala (IIITM-K)<br/>India</p>                                              |
| <p>K, Yoganand<br/>Conservation Biologist<br/>India</p>                                                                                                                | <p>Kaatz, Ingrid<br/>Zoology<br/>none<br/>United States of America (the)</p>                                                                                                                                                            | <p>Kabajani, Miya<br/>Research and Rehabilitation Coordinator<br/>B2Gold Namibia<br/>Namibia</p>                                                                            |
| <p>Kachel, Shannon<br/>Wildlife Ecology and Conservation<br/>University of Washington<br/>United States of America (the)</p>                                           | <p>Kaczmarek, Łukasz<br/>Associate Professor/ Biology<br/>Adam Mickiewicz University in Poznań<br/>Poland</p>                                                                                                                           | <p>Kaczmarska, Zuzanna<br/>Postdoctoral Fellow<br/>EMBL<br/>France</p>                                                                                                      |
| <p>Kádár, András<br/>Co-President<br/>Jane Goodall Institute Hungary<br/>Hungary</p>                                                                                   | <p>Kadej, Marcin<br/>Assistant Professor, biologist<br/>Department of Invertebrate Biology, Evolution and<br/>Conservation, Institute of Environmental Biology, Faculty<br/>of Biological Science, University of Wrocław<br/>Poland</p> | <p>Kadiata, Victor<br/>IT Software Developer &amp; DBA<br/>OSFAC (Observatoire Satellitale des Forêts d'Afrique<br/>Centrale<br/>Congo (the Democratic Republic of the)</p> |
| <p>Kadykalo, Andrew<br/>Ph.D. student<br/>Carleton University<br/>Canada</p>                                                                                           | <p>Kaefer, Igor Luis<br/>Professor / Ecology<br/>Universidade Federal do Amazonas<br/>Brazil</p>                                                                                                                                        | <p>Käffer, Márcia<br/>Post doctoral<br/>Feevale University<br/>Brazil</p>                                                                                                   |
| <p>Kaftanoglu, Osman<br/>Emeritus Professor/Apiculture<br/>Cukurova University, Adana, Turkey<br/>Turkey</p>                                                           | <p>kagansky, alexander<br/>Group leader, Cancer Epigenetics<br/>University of Edinburgh<br/>United Kingdom of Great Britain and Northern Ireland<br/>(the)</p>                                                                          | <p>Kahar, Rafhiah<br/>Brunei Darussalam</p>                                                                                                                                 |
| <p>Kahlen, Jonas<br/>Doctorate student, Wildlife ecology<br/>Institute for Wildlife Ecology and Evolution, University of<br/>Veterinary Science Vienna<br/>Austria</p> | <p>Kahn, Cub<br/>Environmental Sciences<br/>Oregon State University<br/>United States of America (the)</p>                                                                                                                              | <p>Kahn, Joel<br/>MD, FACC, Clinical Professor of Medicine<br/>Wayne State University School of Medicine<br/>United States of America (the)</p>                             |
| <p>Kahnt, Belinda<br/>Germany</p>                                                                                                                                      | <p>Kaiser, Clive *<br/>Professor of Horticulture<br/>Oregon State University<br/>United States of America (the)</p>                                                                                                                     | <p>Kaiser, Hinrich<br/>Professor of Biology<br/>Victor Valley College<br/>United States of America (the)</p>                                                                |

|                                                                                                                                                                                                     |                                                                                                                         |                                                                                                                                                                             |
|-----------------------------------------------------------------------------------------------------------------------------------------------------------------------------------------------------|-------------------------------------------------------------------------------------------------------------------------|-----------------------------------------------------------------------------------------------------------------------------------------------------------------------------|
| Kaiser, Stefanie<br>Biologist<br>Germany                                                                                                                                                            | Kaiser-Bunbury, Christopher<br>Senior Researcher<br>TU Darmstadt<br>Germany                                             | Kaizer, Mariane<br>PhD student<br>University of Salford<br>United Kingdom of Great Britain and Northern Ireland (the)                                                       |
| Kajiki, Lia<br>PhD student in Ecology<br>universidade de Brasília<br>Brazil                                                                                                                         | Kajita, Takaaki<br>Professor (2015 Nobel Prize in Physics)<br>University of Tokyo<br>Japan                              | Kala, Jatin<br>Lecturer<br>Murdoch University<br>Australia                                                                                                                  |
| Kalafusova, Ivana<br>Zoologist<br>State Nature Conservation of Slovak republic<br>Slovakia                                                                                                          | KALALI, Faouzia<br>Lecturer<br>CIRNEF université Rouen<br>France                                                        | Kalamatianou, Sofia<br>United Kingdom of Great Britain and Northern Ireland (the)                                                                                           |
| KALBOUSSI, Mohsen<br>Assistant Professor<br>Institut Sylvo-Pastoral<br>Tunisia                                                                                                                      | Kalei, Heather Nahaku<br>Cultural Biologist<br>United States of America (the)                                           | Kaleme, Prince<br>Head Mammal Research Unit/ Scientific Director<br>Centre de Recherches en Sciences Naturelles, Lwiro/<br>Bukavu<br>Congo (the Democratic Republic of the) |
| Kalen, Ola<br>Researcher, Marine Sciences<br>University of Gothenburg<br>Sweden                                                                                                                     | Kalfas, Nick<br>PhD Candidate, Environmental Sciences<br>University of Adelaide<br>Australia                            | Kalinkat, Gregor<br>Postdoctoral researcher<br>Leibniz-Institute of Freshwater Ecology and Inland<br>Fisheries (IGB)<br>Germany                                             |
| Kalinowska, Anna *<br>Dr, biologist, ecologist, expert in environmental education<br>University Centre for Environmental Studies and<br>Sustainable Development, The University of Warsaw<br>Poland | Källander, Hans<br>PhD, Animal ecologist (retired)<br>Department of Animal Ecology<br>Sweden                            | Kalliola, Risto<br>Professor of geography<br>University of Turku<br>Finland                                                                                                 |
| Källström, Björn<br>PhD Marine Biology<br>Gothenburg Marine Biological Laboratory<br>Sweden                                                                                                         | Kallunki, Jacquelyn<br>Curator Emerita/systematic botany<br>New York Botanical Garden<br>United States of America (the) | Kalogiannakis, Michail<br>Assistant Professor<br>University of Crete<br>Greece                                                                                              |
| Kaloudis, Triantafyllos<br>PhD Chemist<br>EYDAP SA<br>Greece                                                                                                                                        | Kaltenbach, Robin<br>PhD Environmental Sciences<br>University of Koblenz-Landau<br>Germany                              | Kamenova, Stefaniya<br>Postdoc<br>University of Oslo<br>Norway                                                                                                              |

|                                                                                                                                                                                   |                                                                                                                                                   |                                                                                                                                             |
|-----------------------------------------------------------------------------------------------------------------------------------------------------------------------------------|---------------------------------------------------------------------------------------------------------------------------------------------------|---------------------------------------------------------------------------------------------------------------------------------------------|
| Kamerling, Thie<br>Netherlands (the)                                                                                                                                              | KAMGANG, Serge Alexis<br>Conservation biologist/PhD candidate<br>(Primateology)/Lecturer<br>Garoua Wildlife College<br>Cameroon                   | Kamhi, Franne<br>Postdoctoral Fellow<br>Macquarie University<br>Australia                                                                   |
| Kaminski, Gwenaël<br>Associate Professor<br>Toulouse University<br>France                                                                                                         | Kämmer, Juliane<br>Research Scientist, Psychology<br>Charité Universitätsmedizin Berlin<br>Germany                                                | Kämmer, Marcel<br>Environmental science<br>Germany                                                                                          |
| Kamp, Ulrich<br>Professor<br>Department of Geography, University of Montana<br>United States of America (the)                                                                     | kamsteeg, frans<br>associate professor<br>Vrije Universiteit Amsterdam<br>Netherlands (the)                                                       | Kamvar, Zhian<br>Postdoctoral Scholar, Plant Pathology<br>University of Nebraska-Lincoln<br>United States of America (the)                  |
| Kanana Erastus, Fridah<br>Senior Lecturer<br>Kenyatta University<br>Kenya                                                                                                         | Kanasiro, Andre<br>Herpetology Research Assistant<br>Sam Houston State University<br>Brazil                                                       | KANDULU, JOHN<br>Economist<br>CSIRO<br>Australia                                                                                            |
| Kane, Erin<br>Postdoctoral Associate, Anthropology<br>Boston University<br>United States of America (the)                                                                         | Kane, Gordon<br>Victor Weisskopf Distinguished Professor of Physics<br>University of Michigan<br>United States of America (the)                   | Kannebley de Oliveira, Alexandre<br>Biologist<br>Universidade Federal de São Carlos<br>Brazil                                               |
| Kansky, Ruth<br>Post doctoral fellow, Conservation Ecology<br>University of Stellenbosch<br>South Africa                                                                          | Kapdan, Onur<br>sociology<br>uc santa barbara<br>United States of America (the)                                                                   | Kapelonis, Nikos *<br>Technical University Staff<br>University of Crete<br>Greece                                                           |
| Kapiel, Tarek<br>Assistant Professor<br>Cairo University<br>Saudi Arabia                                                                                                          | Karachle, Paraskevi<br>Researcher<br>Institute of Marine Biological Resources and Inland<br>Waters, Hellenic Centre for Marine Research<br>Greece | Karanth, Krithi<br>Associate Conservation Scientist<br>Wildlife Conservation Society<br>India                                               |
| Karan-Žnidaršič, Tamara<br>Assistant professor, biology, general and invertebrate<br>zoology, crustaceology, ostracodology<br>University of Belgrade Faculty of Biology<br>Serbia | Karastanev, Doncho<br>Dr<br>GI-BAS<br>Bulgaria                                                                                                    | Karaytug, Suphan<br>Lecturer<br>Mersin University<br>Turkey                                                                                 |
| Kardamaki, Afroditi<br>Greece                                                                                                                                                     | Kardol, Paul<br>Associate Professor<br>Swedish University of Agricultural Sciences (SLU)<br>Sweden                                                | KAREMO-GARNETT, KATE M. B.<br>Acting Executive Director<br>National Protected Area Authority and Conservation<br>Trust Fund<br>Sierra Leone |



|                                                                                                                |                                                                                                                                                                           |                                                                                                                                                        |
|----------------------------------------------------------------------------------------------------------------|---------------------------------------------------------------------------------------------------------------------------------------------------------------------------|--------------------------------------------------------------------------------------------------------------------------------------------------------|
| Karger, Dirk Nikolaus<br>Research Associate<br>Swiss Federal Research Institute WSL<br>Switzerland             | Karimi, James<br>Naturalist<br>WWF Italy<br>Italy                                                                                                                         | Karl, David<br>Professor of Oceanography<br>University of Hawaii<br>United States of America (the)                                                     |
| Karlson, Ronald<br>Emeritus Professor<br>University of Delaware<br>United States of America (the)              | Karlsson, Therese M.<br>PhD candidate<br>Department of marine sciences, University of Gothenburg<br>Sweden                                                                | Karmin, Monika<br>human population genetics<br>Estonian Biocentre and University of Tartu<br>Estonia                                                   |
| karplus, martin<br>prof of Chemistry emeritus<br>harvard university<br>United States of America (the)          | Karpowicz, Maciej<br>PhD Biology<br>University of Bialystok, Institute of Biology, Department<br>of Hydrobiology, Ciołkowskiego 1J, 15-245 Białystok,<br>Poland<br>Poland | Kärsna, Hannes *<br>Estonia                                                                                                                            |
| Kärsna, Kelli<br>Student<br>Univeristy of Tartu<br>Estonia                                                     | Karssies, Linda<br>Archivist Australian National Soil Archive, Soil Science<br>CSIRO<br>Australia                                                                         | Kartawinata, Kuswata<br>Research Associate (Plant Ecology and Taxonomy)<br>Integrative Research Center, Field Museum<br>United States of America (the) |
| Kartikasari, Ani<br>Ecologist abd social scientist<br>Lincoln university<br>New Zealand                        | Kaschula, Carol<br>Research Scientist<br>Australia                                                                                                                        | Käse, Laura<br>Alfred Wegener Institute Helmholtz Centre for Polar und<br>Marine Research<br>Germany                                                   |
| Kasembele Gyrhais, Kapepula<br>Assistant<br>University of Lubumbashi<br>Congo (the Democratic Republic of the) | Kasina, Muo<br>Economic Entomologist/ agroecologists<br>Kenya Agricultural And Livestock Research Organization<br>Kenya                                                   | Kasoar, Tim<br>University of Cambridge<br>United Kingdom of Great Britain and Northern Ireland<br>(the)                                                |
| Kasonta, Anthony<br>Geophysicist<br>Ministry of Water<br>Tanzania, United Republic of                          | Kasper, Daniele<br>Postdoctoral researcher<br>Universidade Federal do Rio de Janeiro<br>Brazil                                                                            | Kassai, José Roberto<br>Professor of environmental accounting<br>University of Sao Paulo (USP)<br>Brazil                                               |
| Kaster, Manuella<br>Professor<br>Universidade Federal de Santa Catarina<br>Brazil                              | Katlein, Christian<br>Sea Ice Physicist<br>Alfred-Wegener-Institut Helmholtz-Zentrum für Polar-<br>und Meeresforschung<br>Germany                                         | Katovai, Eric<br>Assistant Dean, School of Science and Technology<br>Pacific Adventist University<br>Papua New Guinea                                  |

|                                                                                                                       |                                                                                                                                    |                                                                                                                              |
|-----------------------------------------------------------------------------------------------------------------------|------------------------------------------------------------------------------------------------------------------------------------|------------------------------------------------------------------------------------------------------------------------------|
| Kattwinkel, Mira<br>Geo-Ecologist<br>University of Koblenz-Landau<br>Germany                                          | Katz, David<br>Founder, True Health Initiative<br>Yale University School of Public Health<br>United States of America (the)        | Katzenberger, Jakob<br>Conservation Biologist<br>Georg-August University Göttingen<br>Germany                                |
| Katzner, Erin<br>Director of Global Engagement<br>The Peregrine Fund<br>United States of America (the)                | Kauczok, Dr. Sebastian<br>Physical Chemistry<br>Germany                                                                            | Kaufman, Les<br>Professor<br>Boston University<br>United States of America (the)                                             |
| Kause, Astrid<br>Research fellow<br>University of Leeds<br>United Kingdom of Great Britain and Northern Ireland (the) | Kaushal, Kevin R.<br>PhD Candidate in Economics<br>Norwegian University of Life Sciences<br>Norway                                 | Kavanagh, Rod<br>Senior Ecologist<br>Australian Wildlife Conservancy<br>Australia                                            |
| Kavembe, Geraldine Dorcas<br>Evolutionary Biology<br>South Eastern Kenya University (SEKU)<br>Kenya                   | Kavousi, Javid<br>Iran (Islamic Republic of)                                                                                       | Kawashita-Ribeiro, Ricardo Alexandre<br>Professor adjunct / herpetologist<br>Universidade Federal do Oeste do Pará<br>Brazil |
| Kaweesa, Sara<br>Doctoral Student<br>Centre for Development Research<br>Austria                                       | Kawo, Samuel Tuffa<br>PhD student<br>University of Hohenheim<br>Germany                                                            | Kay, Lou Ellen<br>Biologist<br>Retired, New Mexico State University<br>United States of America (the)                        |
| Kayal, Mohsen<br>Marine biologist - Ecologist<br>Université de Perpignan Via Domitia<br>France                        | Kay-Cruz, Jessa<br>Entomologist / Agronomist<br>The Xerces Society for Invertebrate Conservation<br>United States of America (the) | Kays, Roland<br>Research Associate Professor<br>North Carolina State University<br>United States of America (the)            |
| Kazarian, Kazaros<br>Foreign Professor<br>Universidad Autónoma de Madrid<br>Spain                                     | Keane, Thomas<br>Faculty member<br>EMBL-EBI<br>United Kingdom of Great Britain and Northern Ireland (the)                          | Kearsley, Elizabeth<br>postdoc - tropical ecology<br>Ghent University<br>Belgium                                             |
| Keasar, Tamar<br>Professor of Insect Ecology<br>University of Haifa - Oranim<br>Israel                                | Keating, Richard<br>botanist<br>Missouri Botanical Garden<br>United States of America (the)                                        | Keating, Usna<br>Fisheries scientist, Ornithologist, Scientist, Marine biologist<br>Inland Fisheries Ireland<br>Ireland      |
| Kebede, Yodit<br>PhD Candidate<br>Wageningen University<br>Netherlands (the)                                          | Keck, Hannes<br>PhD Student<br>Swedish University of Agricultural Sciences<br>Sweden                                               | Keeley, Jon<br>Adjunct Professor of Ecology<br>University of California, Los Angeles<br>United States of America (the)       |

|                                                                                                             |                                                                                                                                                  |                                                                                                       |
|-------------------------------------------------------------------------------------------------------------|--------------------------------------------------------------------------------------------------------------------------------------------------|-------------------------------------------------------------------------------------------------------|
| Keeping, Malcolm<br>Senior Entomologist<br>South African Sugarcane Research Institute<br>South Africa       | Keeping, Natalie<br>Researcher<br>South African Sugar association<br>South Africa                                                                | Kehdi, Renata<br>Medica<br>Universidade federal do Ceará<br>Brazil                                    |
| Kehoe, Laura<br>Post Doc<br>University of Victoria<br>Canada                                                | Keiluweit, Marco<br>Assistant Professor, Soil Science<br>University of Massachusetts Amherst<br>United States of America (the)                   | Keinan, Andrés<br>Academic, Biology<br>Universidad Autónoma de la Ciudad de México<br>Mexico          |
| Keišs, Oskars<br>leading researcher / Ornithology<br>Institute of Biology, University of Latvia<br>Latvia   | Keith, Mark<br>PhD Zoology<br>South Africa                                                                                                       | Keith-Diagne, Lucy<br>Executive Director<br>African Aquatic Conservation Fund<br>Senegal              |
| Kelchner, Scot<br>Research Associate Professor<br>Utah State University<br>United States of America (the)   | Keller, Alexander<br>Lecturer<br>University of Würzburg<br>Germany                                                                               | Keller, Randy<br>Geologist<br>Oregon State University<br>United States of America (the)               |
| Kelleway, Jeffrey<br>Postdoctoral Research Fellow<br>Macquarie University<br>Australia                      | Kelley, Laura<br>Lecturer, Animal Perception and Behaviour<br>University of Exeter<br>United Kingdom of Great Britain and Northern Ireland (the) | Kelly, Anne<br>Landscape ecology<br>University of California Merced<br>United States of America (the) |
| Kelly, Crystal<br>Msc Student Ecology<br>Trent University<br>Canada                                         | Kelly, Marcella<br>Professor<br>Virginia Tech<br>United States of America (the)                                                                  | Kelly, Paul<br>Professor of Biology<br>Salem State University<br>United States of America (the)       |
| Kelly, Rachel *<br>Institute of Marine and Antarctic Studies<br>Australia                                   | Kelly, Ryan<br>Assistant Professor<br>School of Marine and Environmental Affairs, University of Washington<br>United States of America (the)     | Keltsch, Florian<br>Biogeography<br>University of Trier<br>Germany                                    |
| Kema Kema, Judicaël Régis *<br>Marine and Freshwater Officer- Southern Programme<br>WWF<br>Gabon            | Kemenes, Alexandre<br>researcher global climate<br>Embrapa<br>Brazil                                                                             | Kemp, Caralyn<br>Post-doctoral fellow in ethology and human-animal interactions<br>Australia          |
| Kemp, Jeremy<br>Marine Biology<br>Independent<br>United Kingdom of Great Britain and Northern Ireland (the) | Kemper, Catherine<br>Senior Researcher, Mammals<br>South Australian Museum<br>Australia                                                          | Ken, Bensolo<br>Policy Officer<br>Wildlife Conservation Society<br>Papua New Guinea                   |

|                                                                                                                                                    |                                                                                                                                                                                  |                                                                                                                                              |
|----------------------------------------------------------------------------------------------------------------------------------------------------|----------------------------------------------------------------------------------------------------------------------------------------------------------------------------------|----------------------------------------------------------------------------------------------------------------------------------------------|
| Kendal, Rachel<br>Associate Professor (Reader) - Evolutionary Anthropology<br>Durham<br>United Kingdom of Great Britain and Northern Ireland (the) | Kendall, Bruce<br>Professor of Applied Ecology<br>University of California, Santa Barbara<br>United States of America (the)                                                      | Keniger, Lucy<br>Conservation Biology<br>Australia                                                                                           |
| Kenk, Vida<br>Evolutionary Biology<br>San Jose State University<br>United States of America (the)                                                  | Kennard, Deborah<br>Professor, Environmental Science<br>Colorado Mesa University<br>United States of America (the)                                                               | Kennard, Robin<br>Wind energy engineer<br>United Kingdom of Great Britain and Northern Ireland (the)                                         |
| Kennedy, Malcolm<br>Research Officer<br>Department of Primary Industries and Regional Development<br>Australia                                     | Kennelly, Julie<br>Doctor<br>University of New England<br>Australia                                                                                                              | Kent, Alyssa<br>Postdoctoral Associate<br>Cornell University<br>United States of America (the)                                               |
| Kent, Cody<br>Graduate Researcher<br>Tulane University<br>United States of America (the)                                                           | Kent, Rafi<br>Ecology<br>Bar Ilan University<br>Israel                                                                                                                           | Kent, Vivien<br>Conservation Biology<br>Durham Wildlife Trust<br>United Kingdom of Great Britain and Northern Ireland (the)                  |
| Kentepozidou, Eleni<br>Educator<br>Greece                                                                                                          | Kenter, Jasper<br>Principal Investigator in Ecological Economics<br>Scottish Association for Marine Science (SAMS)<br>United Kingdom of Great Britain and Northern Ireland (the) | Kenup, Caio<br>Associate Researcher<br>Universidade Federal do Rio de Janeiro<br>Brazil                                                      |
| Kenvat, Rashmi<br>Assistant Professor<br>Anantrao Pawar College of Engineering and Research,<br>Parvati, Pune<br>India                             | Kepfer Rojas, Sebastian<br>Postdoc in Ecology<br>University of Copenhagen<br>Denmark                                                                                             | Keppel, Gunnar<br>Senior Lecturer in Environmental Science<br>University of South Australia<br>Australia                                     |
| Kerbler, Sandra<br>PhD Candidate<br>The University of Western Australia<br>Australia                                                               | Kergoat, Gael<br>Research Scientist - Evolutionary Biology<br>French National Institute for Agricultural Research (INRA)<br>France                                               | Kerle, J. Anne<br>Ecologist<br>Consultant<br>Australia                                                                                       |
| Kerley, Adrienne<br>PhD Student<br>United Kingdom of Great Britain and Northern Ireland (the)                                                      | Kerley, Graham<br>Distinguished Professor of Zoology<br>Nelson Mandela University<br>South Africa                                                                                | Kerr, Gregory<br>Landscape Ecologist - Eyre Peninsula<br>South Australian Department of Environment Water and Natural Resources<br>Australia |

|                                                                                                                                                             |                                                                                                                |                                                                                                                            |
|-------------------------------------------------------------------------------------------------------------------------------------------------------------|----------------------------------------------------------------------------------------------------------------|----------------------------------------------------------------------------------------------------------------------------|
| Kerr, Jeremy<br>University Research Chair in Macroecology and Conservation and Professor of Biology<br>University of Ottawa<br>Canada                       | Kerr, Kevin<br>Curator of Birds and Invertebrates<br>Toronto Zoo<br>Canada                                     | kerschner, Christian<br>Assistant Professor<br>Masaryk University<br>Czech Republic (the)                                  |
| Kerstholt, Maud<br>Biomedical Sciences / Bioinformatics<br>University Medical Centre Utrecht, Wageningen University & Research<br>Netherlands (the)         | Kersting, Diego<br>Researcher<br>Institut für Geologische Wissenschaften. Freie Universität Berlin<br>Germany  | Kerviel, Adeline<br>Research fellow<br>United Kingdom of Great Britain and Northern Ireland (the)                          |
| KERVYN, Thierry<br>Dr. Sc.<br>ULiège<br>Belgium                                                                                                             | Keshavmurthy, Shashank<br>Postdoctoral Research Fellow<br>Academia Sinica<br>Taiwan                            | Kessler, Michael<br>Botany<br>University of Zurich<br>Switzerland                                                          |
| Kester, Jessica<br>VP of Education<br>Allegheny Land Trust<br>United States of America (the)                                                                | Ketchell, Thomas<br>Entrepreneur in Residence<br>University of Massachusetts<br>United States of America (the) | Keuper, Frida<br>Researcher, Ecology<br>French National Institute for Agricultural Research (INRA)<br>France               |
| Kevan, FRSC, FRES, FLS, FRSB, Peter<br>University Professor Emeritus<br>University of Guelph<br>Canada                                                      | Keys, Brianna<br>Research Analyst, Public Policy<br>Oregon State University<br>United States of America (the)  | Khalatbari, Leili<br>PhD Student<br>CIBIO/Inbio University of Porto Portugal<br>Portugal                                   |
| Khalik, M. Z.<br>Researcher in Evolutionary Biology<br>Universiti Malaysia Sarawak<br>Malaysia                                                              | Khalil, Élie<br>Geomatics/Data analysis<br>Université Catholique de Louvain<br>Belgium                         | Khan, Caira<br>Australia                                                                                                   |
| Khan, Hameed<br>Project coordinator / soil science<br>central plantation crops research institute - ICAR<br>India                                           | Khanyi, Hlobisile<br>MSC Student<br>North-West University<br>South Africa                                      | Khatter, Heena<br>Postdoctoral fellow<br>EMBL<br>Germany                                                                   |
| khatun, Kaysara<br>Marie Curie Fellow<br>Environmental Change Institute- University of Oxford<br>United Kingdom of Great Britain and Northern Ireland (the) | Khila, Abderrahman<br>Principal investigator<br>CNRS France<br>France                                          | Khlentzos, Drew<br>Adjunct Professor, Department of Linguistics<br>Macquarie University, New South Wales 2109<br>Australia |
| Khorozyan, Igor<br>Research scientist<br>Georg-August-Universität Göttingen, Germany<br>Armenia                                                             | KHush, Gurdev<br>Adjunct Professor<br>University of California , Davis<br>United States of America (the)       | Khwarahm, Nabaz<br>Lecturer in Ecology and Pollution<br>University of Sulaimani<br>Iraq                                    |

|                                                                                                              |                                                                                                                                                    |                                                                                                                                        |
|--------------------------------------------------------------------------------------------------------------|----------------------------------------------------------------------------------------------------------------------------------------------------|----------------------------------------------------------------------------------------------------------------------------------------|
| Kicklighter, Cynthia<br>Associate Professor of Biology<br>Goucher College<br>United States of America (the)  | Kidane O., Yohannes<br>Biogeography<br>University of Bayreuth<br>Germany                                                                           | Kiefer, Sarah<br>Citizen Science Coordinator<br>Leibniz-Institute for Zoo and Wildlife Research, Berlin<br>(BIBS)<br>Germany           |
| Kiehn, Michael<br>Director, Botanical Garden<br>University of Vienna<br>Austria                              | Kiene, Marvin<br>Master of Science (Biology)<br>Germany                                                                                            | Kienle, Cornelia<br>Scientist in aquatic ecotoxicology<br>Swiss Centre for Applied Ecotoxicology Eawag-EPFL<br>Switzerland             |
| Kierepka, Elizabeth<br>Postdoctoral Fellow in Ecology and Genetics<br>Trent University<br>Canada             | Kiesel, Jens<br>PostDoc at the Leibniz-Institute of Freshwater Ecology<br>and Inland Fisheries, Germany<br>Kiesel<br>Germany                       | KIKI, MARTIAL<br>Benin                                                                                                                 |
| Kildea, Tim<br>Senior Scientist, Environmental Assessment<br>South Australian Water Corporation<br>Australia | Kilian, Norbert<br>Scientist, Research Group Leader / Botany<br>Botanic Garden and Botanical Museum Berlin, Freie<br>Universität Berlin<br>Germany | Kilpi, Mikael<br>Senior researcher, ecology<br>University of Helsinki<br>Finland                                                       |
| Kim, Carlina<br>Undergrad in Environmental Sciences<br>University of British Columbia<br>Canada              | Kim, Catherine<br>PhD Student - Coral Reef Ecology<br>University of Queensland, Australia<br>United States of America (the)                        | Kim, Janice<br>Medical Epidemiologist<br>California Department of Public Health<br>United States of America (the)                      |
| Kim, Jeong Yoon<br>Biology<br>European Molecular Biology Laboratory<br>New Zealand                           | Kim, Mikael<br>PhD Student, Marine biology<br>University of Technology Sydney<br>Australia                                                         | KIM, Namsuk<br>postdoc<br>College de France<br>France                                                                                  |
| Kim, Seon Young<br>Korea (the Republic of)                                                                   | Kimball, Heather<br>Ecology<br>Pacific Science Advocates<br>United States of America (the)                                                         | Kimbrough, Elizabeth<br>Ph.D. Student/Ecology<br>Tulane University<br>United States of America (the)                                   |
| Kin, Bram<br>Applied Economic Sciences<br>Vrije Universiteit Brussels<br>Belgium                             | Kindermann, Liana<br>researcher of climate change impacts / vegetation<br>ecology<br>University of Cologne<br>Germany                              | Kinefuchi, Etsuko<br>Associate Professor/Communication<br>University of North Carolina at Greensboro<br>United States of America (the) |
| King, Alexander<br>Acoustic Engineer<br>Technical University of Denmark<br>Denmark                           | King, David<br>Ecologist<br>United States of America (the)                                                                                         | King, Dr Gaylord Skip<br>retired insect pheromone chemist<br>Simon Fraser University<br>Canada                                         |

|                                                                                                                                         |                                                                                                                                          |                                                                                                                                     |
|-----------------------------------------------------------------------------------------------------------------------------------------|------------------------------------------------------------------------------------------------------------------------------------------|-------------------------------------------------------------------------------------------------------------------------------------|
| King, Geoffrey<br>Aerospace Engineer<br>University of Colorado at Boulder<br>United States of America (the)                             | King, Jonathan<br>Reader, Marine Science<br>Bangor University<br>United Kingdom of Great Britain and Northern Ireland (the)              | King, Lucy<br>Head of Human-Elephant Co-Existence Program and<br>Doctor of Zoology,<br>Save the Elephants<br>Kenya                  |
| King, Rebecca<br>PhD candidate in Animal Sciences<br>Newcastle University<br>United Kingdom of Great Britain and Northern Ireland (the) | King, Russell<br>General Practitioner - medicine<br>University of New England<br>Australia                                               | King, Shauna<br>Wildlife Biologist<br>Institute for Conservation Research<br>United States of America (the)                         |
| Kingma, Sytze<br>Scholar Organization Sciences<br>VU University<br>Netherlands (the)                                                    | Kingondu, Cecil<br>Senior Lecturer<br>South Eastern Kenya University<br>Kenya                                                            | Kinkel, Hanno<br>Science Coordinator<br>GEOMAR Helmholtz Centre for Ocean Research Kiel<br>Germany                                  |
| Kinross, Cilla<br>Adjunct Lecturer in Environmental Management<br>Charles Sturt University<br>Australia                                 | Kjørboe, Thomas<br>Professor & Cwnter Leader, Biolical Oceanography<br>Centre for Ocean Life, Technical University of Denmark<br>Denmark | Kioussi, Chrissa<br>Professor of Pharmacology<br>Oregon State University<br>United States of America (the)                          |
| Kip, E.L.<br>Graduate Student, Marine Sciences<br>Utrecht University<br>Netherlands (the)                                               | KIRANKAYA, Şerife Gülsün<br>Assoc. Prof. Dr. / Biology<br>Duzce University<br>Turkey                                                     | Kirchhof, Sebastian<br>Researcher, Ecology<br>Museum für Naturkunde, Berlin<br>Germany                                              |
| Kirk, Amanda<br>Environmental Engineer<br>Opus International Consultants<br>New Zealand                                                 | Kirkland, Kelly<br>PhD student in Psychology<br>University of Queensland<br>Australia                                                    | Kirkman, Kevin<br>Dean of Research<br>University of KwaZulu-Natal<br>South Africa                                                   |
| Kirkpatrick, Kaylyn<br>Graduate Researcher<br>Oregon State University<br>United States of America (the)                                 | Kirkpatrick, Will<br>Lab Tech<br>University of Tennessee<br>United States of America (the)                                               | Kirkwood, Andrea<br>Associate Professor of Biology<br>University of Ontario Institute of Technology<br>Canada                       |
| Kirsch, Eileen<br>research wildlife biologist<br>USGS<br>United States of America (the)                                                 | Kirschbaum, Anna<br>PhD student; Plant Evolutionary Ecology<br>Eberhard Karls Universität Tübingen<br>Germany                            | Kirui, Joackim<br>Environmental scientist graduate<br>Egerton university<br>Kenya                                                   |
| Kisakuerek Ibsen, Basak<br>Germany                                                                                                      | Kisel, Yael<br>Evolutionary Biologist<br>KBRWyle/NASA Ames Research Center<br>United States of America (the)                             | Kiss, Andor<br>Director of Center for Bioinformatics & Functional<br>Genomics<br>Miami University<br>United States of America (the) |

|                                                                                                                                                         |                                                                                                                                     |                                                                                                                                                                  |
|---------------------------------------------------------------------------------------------------------------------------------------------------------|-------------------------------------------------------------------------------------------------------------------------------------|------------------------------------------------------------------------------------------------------------------------------------------------------------------|
| Kissling, W. Daniel<br>Associate Professor<br>Institute for Biodiversity and Ecosystem Dynamics (IBED),<br>University of Amsterdam<br>Netherlands (the) | KITCHING, Roger *<br>Emeritus Professor<br>Griffith University<br>Australia                                                         | Kite, Katharine<br>Research assistant ecology<br>RSPB<br>United Kingdom of Great Britain and Northern Ireland<br>(the)                                           |
| Kittel, Timothy<br>Research Associate, Institute of Arctic and Alpine<br>Research<br>University of Colorado, Boulder<br>United States of America (the)  | Kittlmann, Sebastian<br>Oxford Brookes University<br>United Kingdom of Great Britain and Northern Ireland<br>(the)                  | Kittle, Ronald<br>PhD Candidate<br>University of Louisiana at Lafayette<br>United States of America (the)                                                        |
| Kiup, Emma<br>Papua New Guinea Coffee Industry Corporation Ltd<br>Papua New Guinea                                                                      | Kivell, Bronwyn<br>Senior Lecturer<br>Victoria University of Wellington<br>New Zealand                                              | Kjellander, Petter<br>Professor<br>Dep of Ecology, Swedish University of Agricultural<br>Sciences<br>Sweden                                                      |
| Klaas, Christine<br>Senior scientist / Biological Oceanography<br>Alfred Wegener Institute for Polar and Marine Research<br>(AWI)<br>Germany            | Klaassen, Marcel<br>Professor in Ecology<br>Centre for Integrative Ecology, Deakin University<br>Australia                          | Klaczko, Louis Bernard<br>Professor / Genetics<br>UNICAMP - State University of Campinas<br>Brazil                                                               |
| Klaere, Steffen<br>University of Auckland<br>New Zealand                                                                                                | Klages, Johann P.<br>Marine Geologist<br>Alfred Wegener Institute Helmholtz Center for Polar and<br>Marine Research<br>Germany      | Klain, Sarah<br>Post-Doctoral Research Associate, College of Earth Ocean<br>and Atmospheric Science<br>Oregon State University<br>United States of America (the) |
| Klánová, Jana<br>professor<br>Masaryk University<br>Czech Republic (the)                                                                                | Klapper, Martin<br>Natural Product Chemistry<br>Leibniz-Institute for Natural Product Chemistry and<br>Infection Biology<br>Germany | Klappert, Kirsten<br>Biologist<br>Eawag<br>Switzerland                                                                                                           |
| Klasek, Scott<br>Graduate Student, Environmental Microbiology<br>Oregon State University<br>United States of America (the)                              | Klass, Keren<br>PhD student, Primatology<br>University of Toronto<br>Canada                                                         | Klassen, Susanna<br>PhD Student, Agriculture, Resource Management &<br>Sustainability<br>University of British Columbia<br>Canada                                |
| Klaus, Marcus<br>Biogeochemistry<br>Ecology and Environmental Science<br>Sweden                                                                         | Klaus, Rebecca<br>Tropical Marine Ecologist<br>United Kingdom of Great Britain and Northern Ireland<br>(the)                        | Klaus, Siegfried<br>Biology, Game Biology, Ecology<br>retired, NABU Germany<br>Germany                                                                           |



|                                                                                                                                           |                                                                                                                              |                                                                                                                                         |
|-------------------------------------------------------------------------------------------------------------------------------------------|------------------------------------------------------------------------------------------------------------------------------|-----------------------------------------------------------------------------------------------------------------------------------------|
| Klaus, Valentin<br>Ecologist, Agricultural science<br>ETH Zurich<br>Switzerland                                                           | Klawitter, Jonathan<br>PhD Student<br>University of Auckland<br>New Zealand                                                  | Klayn, Stefania<br>PhD student, marine biology<br>Bulgaria                                                                              |
| Kleijn, David<br>professor in Plant Ecology and Nature Conservation<br>Wageningen University<br>Netherlands (the)                         | Klein, Ákos<br>Ecology, senior conservationist<br>Barn Owl Foundation, Hungary<br>Hungary                                    | Klein, Alexandra-Maria<br>Nature Conservation and Landscape Ecology<br>University of Freiburg<br>Germany                                |
| Klein, Daniel<br>Environmental Science - Water Conservation<br>Canada                                                                     | Klein, Simon<br>PhD student<br>Macquarie University<br>Australia                                                             | Kleiner, Manuel<br>Assistant Professor<br>North Carolina State University<br>United States of America (the)                             |
| Kleinschroth, Fritz<br>Postdoctoral Researcher in Ecosystem Management<br>ETH Zürich Institute of Terrestrial Ecosystems<br>Switzerland   | Klenz, Jennifer<br>Senior Instructor in Botany and Zoology<br>University of British Columbia<br>Canada                       | Klett, Katrina<br>Graduate Student- Chemical Ecology<br>Chinese Academy of Science- Xishuangbanna Tropical<br>Botanical Garden<br>China |
| KLETTY, Florian<br>PHD ecology / ecophysiology<br>CNRS<br>France                                                                          | Kleyheeg, Erik<br>Postdoctoral researcher in Avian Ecology<br>Max Planck Institute for Ornithology<br>Germany                | Klignes, David<br>Resident Naturalist<br>Alliance for a Sustainable Amazon<br>Peru                                                      |
| Klimaszewski, Jan<br>Research Scientista, Entomology<br>NRCAN, CFS, Laurentian Forestry Centre<br>Canada                                  | Klinenberg, Eric<br>Professor of Sociology and Public Policy<br>New York University<br>United States of America (the)        | Kling, Jennifer<br>Plant Breeder<br>Oregon State University<br>United States of America (the)                                           |
| Klingbeil, Brian<br>Postdoctoral Scientist<br>Auburn University<br>United States of America (the)                                         | Klinges, Julia Grace<br>PhD student in coral microbiology<br>Oregon State University<br>United States of America (the)       | Klinghardt, Moritz<br>M.Sc. Biology<br>University of Oldenburg<br>Germany                                                               |
| Klinke, Christian<br>Group leader<br>University of Hamburg<br>Germany                                                                     | Klischies, Meike<br>Doctoral researcher / Geoscience<br>GEOMAR - Helmholtz Center for Ocean Research Kiel<br>Germany         | Klitzke, Sonda<br>Scientist<br>German Environment Agency<br>Germany                                                                     |
| Klocke, Michael<br>Senior Scientist (Systems Microbiology)<br>Leibniz Institute for Agricultural Engineering and<br>Bioeconomy<br>Germany | Klocko, Amy<br>Instructor, PhD in Plant Biology<br>University of Colorado, Colorado Spring<br>United States of America (the) | Klopfstein, Seraina<br>Postdoctoral Researcher<br>University of Bern<br>Switzerland                                                     |

|                                                                                                                                                                                      |                                                                                                                                                       |                                                                                                                                                                                  |
|--------------------------------------------------------------------------------------------------------------------------------------------------------------------------------------|-------------------------------------------------------------------------------------------------------------------------------------------------------|----------------------------------------------------------------------------------------------------------------------------------------------------------------------------------|
| Klückow, Timothy<br>Conservation/Aquaculture<br>~~~<br>Zimbabwe                                                                                                                      | Kluen, Edward<br>Researcher (biologist)<br>Finland                                                                                                    | Klutsch, Cornelya<br>Postdoctoral Researcher/Biologist<br>Trent University<br>Canada                                                                                             |
| Kment, Petr<br>entomologist<br>National Museum<br>Czech Republic (the)                                                                                                               | Kmentová, Nikol<br>Parasitologist<br>Masaryk University<br>Czech Republic (the)                                                                       | Kmita, Hanna<br>Professor<br>Adam Mickiewicz University, Faculty of Biology, Institute<br>of Molecular Biology and Biotechnology<br>Poland                                       |
| Knaff, Rémi<br>INRA<br>France                                                                                                                                                        | Knapp, Charles<br>United States of America (the)                                                                                                      | Knapp, Ingrid<br>Postdoctoral Researcher in Marine Biology<br>University of Hawaii, Hawaii Institute of Marine Biology<br>United States of America (the)                         |
| Knapp, Katie<br>Biology Graduate Student<br>Annis Water Resources Institute - Grand Valley State<br>University<br>United States of America (the)                                     | Knapp, Markus<br>Research Scientist<br>Koppert Biological Systems<br>Netherlands (the)                                                                | Knees, Sabina<br>PhD, Research Associate<br>Centre for Middle Eastern Plants, Royal Botanic Garden<br>Edinburgh<br>United Kingdom of Great Britain and Northern Ireland<br>(the) |
| Kneitel, Jamie<br>Professor<br>California State University, Sacramento<br>United States of America (the)                                                                             | Kneller, Laura<br>MA student in Toxicology<br>Charite - Berlin University of Medicine<br>Germany                                                      | Knelman, Joseph<br>United States of America (the)                                                                                                                                |
| Knickel, Karlheinz<br>Visiting Research Professor / Research Coordinator<br>ICAAM - Instituto de Ciências Agrárias e Ambientais<br>Mediterrânicas, Universidade de Évora<br>Portugal | Knight, Andrew<br>Professor of Animal Welfare and Ethics<br>University of Winchester<br>United Kingdom of Great Britain and Northern Ireland<br>(the) | Knight, Dennis<br>Professor Emeritus, Botany and Ecology<br>University of Wyoming<br>United States of America (the)                                                              |
| Knight, Jon<br>Estuarine Environmental Scientist<br>Griffith University<br>Australia                                                                                                 | Knight, Michael<br>Park Planning & Development<br>South African National Parks<br>South Africa                                                        | Knight, V. Bleu<br>Neuroscience<br>New Mexico State University<br>United States of America (the)                                                                                 |
| Knittweis, Leyla<br>Lecturer in Fish Biology & Fisheries Science<br>University of Malta<br>Malta                                                                                     | Knobel, Marcelo<br>Rector<br>University of Campinas (Unicamp)<br>Brazil                                                                               | Knöbel, Loreen<br>PhD Student in Evolutionary Biology<br>Senckenberg Natural History Collections<br>Germany                                                                      |

|                                                                                                                                  |                                                                                                                                                                                                          |                                                                                                                           |
|----------------------------------------------------------------------------------------------------------------------------------|----------------------------------------------------------------------------------------------------------------------------------------------------------------------------------------------------------|---------------------------------------------------------------------------------------------------------------------------|
| Knoerzer, Kai<br>Food Process Engineer<br>Commonwealth Scientific and Industrial Research Organisation (CSIRO)<br>Australia      | Knot, Ineke<br>PhD student<br>University of Amsterdam<br>Netherlands (the)                                                                                                                               | Knowler, Sarah<br>Environmental Microbiologist<br>La Trobe University<br>Australia                                        |
| Knowlton, Jessie<br>Assistant Professor, Biology<br>Wheaton College Massachusetts<br>United States of America (the)              | Knox, Kirsten<br>Research Scientist<br>Australia                                                                                                                                                         | Knox, Oliver<br>Senior Lecturer<br>University of New England<br>Australia                                                 |
| Knutsson, Per<br>Senior lecturer in Environmental Social Science<br>School of Global Studies, University of Gothenburg<br>Sweden | Ko, Meng-Ching<br>PhD candidate in Neurobiology<br>Max Planck Institute for Ornithology<br>Germany                                                                                                       | Koami B. J. Norbert, GBENYEDJI<br>PhD<br>Université de Lomé<br>Togo                                                       |
| Kobayashi, Gerson<br>Post doc, Human Genetics<br>Universidade de São Paulo<br>Brazil                                             | koblitz, rodrigo<br>Environmental analyst<br>IBAMA. INSTITUTO BRASILEIRO DO MEIO AMBIENTE E DOS RECURSOS NATURAIS RENOVÁVEIS<br>Brazil                                                                   | Koch, Amelia<br>Research Biologist (forest)<br>Forest Practices Authority<br>Australia                                    |
| Koch, André P.<br>Biodiversity Researcher<br>Zoologisches Forschungsmuseum Alexander Koenig<br>Germany                           | Koch, Claudia<br>Curtor of Herpetology<br>Zoologisches Forschungsmuseum Alexander Koenig Bonn<br>Germany                                                                                                 | Koch, Ido<br>Research fellow, Institute of Archaeology<br>Tel Aviv University<br>Israel                                   |
| Koch, Jonathan<br>Ecologist<br>University of Hawaii, Hilo<br>United States of America (the)                                      | Kochan, David<br>Phd Student, Ecology<br>Florida International University<br>United States of America (the)                                                                                              | Kochen, Momo<br>Director Programs/Sustainable Fisheries NGO<br>Masyarakat dan Perikanan Indonesia (MDPI)<br>Indonesia     |
| Kock, Alison<br>Marine Biologist<br>South African National Parks<br>South Africa                                                 | Kock, Richard<br>Professor veterinary medicine - specialist in emerging and infectious disease wildlife<br>Royal Veterinary College London<br>United Kingdom of Great Britain and Northern Ireland (the) | Kocken, Ilja<br>PhD candidate in Palaeoceanography<br>Utrecht University<br>Netherlands (the)                             |
| Koehler, Birgit<br>Researcher Biogeochemistry<br>Uppsala University<br>Sweden                                                    | Koehler, Hartmut<br>Prof. (retired) Ecology<br>University of Bremen<br>Germany                                                                                                                           | Koehn, Maja<br>Professor for Integrated Signalling Research in Biology and Chemistry<br>University of Freiburg<br>Germany |

|                                                                                                                                   |                                                                                                                                                        |                                                                                                                                                |
|-----------------------------------------------------------------------------------------------------------------------------------|--------------------------------------------------------------------------------------------------------------------------------------------------------|------------------------------------------------------------------------------------------------------------------------------------------------|
| Koehne, Jana C.<br>MSc Student Environmental Marine Science<br>University of Oldenburg<br>Germany                                 | Koerner, Sally<br>Ecology<br>University of North Carolina at Greensboro<br>United States of America (the)                                              | Koeth, Monica<br>Entomologist<br>Germany                                                                                                       |
| Kofes, Suely<br>Anthropologist<br>Unicamp<br>Brazil                                                                               | Kofod Petersen, Tanja<br>PhD Candidate in Biolgy<br>NTNU University Museum<br>Norway                                                                   | Kögler, Anna<br>Predoctoral Fellow<br>European Molecular Biology Laboratory (EMBL)<br>Heidelberg<br>Germany                                    |
| Kohl, Lukas<br>Postdoctoral Fellow<br>University of Toronot<br>Canada                                                             | Kohl, Stefan<br>Dr. rer. nat., Mathematics<br>Germany                                                                                                  | Kohlbach, Doreen<br>Postdoctoral Researcher<br>Germany                                                                                         |
| Kohler, Glenn<br>Forest Entomologist<br>Washington Department of Natural Resources<br>United States of America (the)              | Kohler, Quentin<br>Nature protection project manager<br>A Rocha<br>Switzerland                                                                         | Kohler, Tyler<br>Researcher, ecology<br>Charles University<br>Czech Republic (the)                                                             |
| Köhler, Lars<br>Curator Experimental Botanical Garden Göttingen<br>University of Göttingen<br>Germany                             | Köhler, Matias<br>PhD Candidate, Botany<br>Universidade Federal do Rio Grande do Sul<br>Brazil                                                         | Kohlmann, Thomas<br>Graduate Student of Ecology<br>SUNY Stony Brook<br>United States of America (the)                                          |
| Köhn, Alf<br>Postdoctoral researcher, plasma physics<br>Max Planck Institute for Plasma Physics<br>Germany                        | Koistinen, Katariina<br>Junior Researcher, Sustainability Science<br>Lappeenranta University of Technology<br>Finland                                  | Kok, Eva<br>Phd Student<br>NIOZ<br>Netherlands (the)                                                                                           |
| Kok, Juultje<br>PhD Mathematics<br>KU Leuven<br>Belgium                                                                           | Kokal, Kristin<br>United States of America (the)                                                                                                       | Kokkoris, Giorgos<br>Assistant Professor, Statistical and Mathematical Ecology<br>Dept. of Marine Sciences, University of the Aegean<br>Greece |
| Kolanowski, Wojciech<br>Prof. Food Science and Human Nutrition<br>Siedlce University of Natural Sciences and Humanities<br>Poland | Koldewyn, Kami<br>Lecturer in Psychology and Social Neuroscience<br>Bangor University<br>United Kingdom of Great Britain and Northern Ireland<br>(the) | Kolev, Stanimir<br>associate professor<br>Sofia University<br>Bulgaria                                                                         |
| Kolicka, Małgorzata<br>Researcher<br>Department of Animal Taxonomy and Ecology, Adam<br>Mickiewicz University in Poznań<br>Poland | Kolipaka, S.S<br>Researcher<br>Leiden University<br>Netherlands (the)                                                                                  | Kollai, Helen<br>Research Assistant<br>Leibniz Institute of Ecological Urban and Regional<br>Development (IOER)<br>Germany                     |

|                                                                                                                                            |                                                                                                             |                                                                                                                    |
|--------------------------------------------------------------------------------------------------------------------------------------------|-------------------------------------------------------------------------------------------------------------|--------------------------------------------------------------------------------------------------------------------|
| Koller, Silvia<br>Professor<br>UFRGS<br>Brazil                                                                                             | Kolodny, Oren<br>Post-doctoral researcher, Biology<br>Stanford University<br>United States of America (the) | Kolska Horwitz, Liora *<br>Researcher<br>The Hebrew University<br>Israel                                           |
| Kolstad, Anders Lorentzen<br>PhD student in Ecology<br>NTNU University Museum, Norwegian University of<br>Science and Technology<br>Norway | Koltzenburg, Michael<br>Biologist<br>University of Tuebingen<br>Germany                                     | Komape, Dennis Mmakgabo<br>MSc Student<br>North-West University<br>South Africa                                    |
| Kominoski, John<br>Assistant Professor<br>Florida International University<br>United States of America (the)                               | Komonen, Atte<br>University lecturer<br>Finland                                                             | Konczal, Mateusz<br>Adam Mickiewicz University in Poznan<br>Poland                                                 |
| Kondoh, Kazumi<br>Chuo University<br>Japan                                                                                                 | KONE, Inza<br>Senior Lecturer of Conservation Biology<br>Université Félix Houphouet-Boigny<br>Côte d'Ivoire | Konjević, Dean<br>Assist. Prof., Dipl. ECZM<br>University of Zagreb, The Faculty of Veterinary Medicine<br>Croatia |
| Konno, Tatiana<br>UFRJ<br>Brazil                                                                                                           | Kontautas, Antanas<br>researcher, hydrobiology<br>Klaipeda University<br>Lithuania                          | Konter, Johan<br>Mathematics<br>Northwestern<br>United States of America (the)                                     |
| Kontschán, Jenő<br>director<br>Plant Protection Institute, Centre for Agricultural<br>Researches, Hungarian Academy of Sciences<br>Hungary | Koocheki, Alireza<br>Professor<br>Ferdowsi University of Mashhad<br>Iran (Islamic Republic of)              | Kool, Richard<br>Professor, Environmental Education and Communication<br>Royal Roads University<br>Canada          |
| Koontz, Fred<br>Wildlife Biology<br>Retired<br>United States of America (the)                                                              | Kooyman, Robert<br>Research Fellow in Ecology and Botany<br>Macquarie University<br>Australia               | Kopach, Andrii<br>PhD student in Biology<br>MPI-CBG, Dresden<br>Germany                                            |
| Koper, Michal<br>PhD/molecular biology<br>Institute of Genetics and Biotechnology, Faculty of<br>Biology, University of Warsaw<br>Poland   | Kopnina, Helen<br>researcher, lecturer<br>Leiden University<br>Netherlands (the)                            | KOPP, KATIA<br>Biologist<br>Goias Federal University<br>Brazil                                                     |
| Koppelman, Rolf<br>Researcher and Lecturer in Biological Oceanography<br>University of Hamburg<br>Germany                                  | Koppelmeyer, Bernd<br>Limnologist<br>enviteam Umwelt-Netzwerk Gewässer & Landschaft<br>Germany              | Köpping, Isabell<br>M.Sc. Environmental Engineer and PhD student<br>Eawag - Water Research<br>Switzerland          |

|                                                                                                                                                                                    |                                                                                                                                                                                            |                                                                                        |
|------------------------------------------------------------------------------------------------------------------------------------------------------------------------------------|--------------------------------------------------------------------------------------------------------------------------------------------------------------------------------------------|----------------------------------------------------------------------------------------|
| Koprowski, John<br>Professor of Wildlife Conservation<br>University of Arizona<br>United States of America (the)                                                                   | Kopte, Robert<br>PhD candidate Oceanography<br>GEOMAR<br>Germany                                                                                                                           | Korasaki, Vanesca<br>Professor<br>Universidade do Estado de Minas Gerais<br>Brazil     |
| Kordas, Dr Rebecca<br>Research Fellow<br>Imperial College London<br>United Kingdom of Great Britain and Northern Ireland (the)                                                     | Koren, Johannes<br>Clinical Neuroscience<br>Karl Landsteiner Institute for Clinical Epilepsy Research and Cognitive Neurology<br>Austria                                                   | Koren, Lee<br>Wildlife ecologist<br>Bar Ilan University<br>Israel                      |
| Kormas, Konstantinos<br>Professor<br>University of Thessaly<br>Greece                                                                                                              | Kornder, Niklas<br>PhD Candidate/ Coral reef Ecology<br>University of Amsterdam<br>Netherlands (the)                                                                                       | Korngreen, Alon<br>Faculty of life sciences<br>Bar-Ilan University<br>Israel           |
| Kornilaki, Ekaterina<br>Associate Professor in Developmental Psychology<br>University of Crete<br>Greece                                                                           | Korniluk, Michał<br>Ecology<br>Museum & Institute of Zoology, Polish Academy of Sciences<br>Poland                                                                                         | Koroiva, Ricardo<br>PhD student<br>Federal University of Mat Grosso do Sul<br>Brazil   |
| Korovchinsky, Nikolay<br>Leading Research Scientist, zoologist<br>A.N. Severtsov Institute of ecology and evolution of the Russian Academy of Sciences<br>Russian Federation (the) | Kortland, Kenny<br>Ecologist<br>Forestry Commission Scotland<br>United Kingdom of Great Britain and Northern Ireland (the)                                                                 | Kosanic, Aleksandra (Sasha)<br>Research Associate<br>University of Konstanz<br>Germany |
| Koschnitzke, Cristiana<br>Professor / Botany<br>Universidade Federal do Rio de Janeiro<br>Brazil                                                                                   | Koscielak, Katie<br>Sustainability Analyst<br>Humboldt State University<br>United States of America (the)                                                                                  | Koslowski, Maximilian<br>NTNU<br>Norway                                                |
| Köster, Nils<br>Scientific curator of tropical and subtropical living collections<br>Botanic Garden and Botanical Museum Berlin<br>Germany                                         | Kotiaho, Janne<br>Professor of Ecology and Scientific Director<br>Department of Biological and Environmental Science and Sustainability Science Centre, University of Jyväskylä<br>Finland | koto, Camari Waqanivalu<br>Human Geographer<br>University of the South Pacific<br>Fiji |
| Kotov, Alexey *<br>Dr.Sci. in Zoology<br>A.N. Severtsov Institute of Ecology and Evolution of Russian Academy of Sciences<br>Russian Federation (the)                              | Kotrba, Marion<br>Curator<br>Zoologische Staatssammlung<br>Germany                                                                                                                         | Kottelat, Maurice<br>Biologist<br>Delémont<br>Switzerland                              |

|                                                                                                                                |                                                                                                                                                       |                                                                                                                                                                             |
|--------------------------------------------------------------------------------------------------------------------------------|-------------------------------------------------------------------------------------------------------------------------------------------------------|-----------------------------------------------------------------------------------------------------------------------------------------------------------------------------|
| Kouagou, M'Mouyohoun<br>Ecological modeling<br>University of Parakou<br>Benin                                                  | Koudelková, Lenka<br>Bachelor degree in Sociology<br>Comenius University in Bratislava<br>Slovakia                                                    | Kough, Andrew<br>Marine Ecologist<br>John G. Shedd Aquarium<br>United States of America (the)                                                                               |
| Koulgi, Pradeep<br>Wildlife and Conservation Biology<br>India                                                                  | Kounchev, Ognyan<br>Professor, Mathematics and Computer Science<br>Bulgarian Academy of Sciences<br>Bulgaria                                          | Kourkoutas, Elias *<br>University of Crete<br>Greece                                                                                                                        |
| Kouwenberg, Juliana *<br>Marine scientist zooplankton<br>University of Amsterdam<br>Netherlands (the)                          | Kovacs, Eva<br>Australia                                                                                                                              | Kovalenko, Katya<br>Aquatic Ecologist<br>University of Minnesota Duluth<br>United States of America (the)                                                                   |
| Kovalev, Vitaly<br>Scientific Software Engineer, Imaging Mass Spectrometry<br>European Molecular Biology Laboratory<br>Germany | Kovarikova, Kristyna<br>Bats<br>Czech university of lifisciences<br>Czech Republic (the)                                                              | Kovarovic, Kris<br>Associate Professor in Human Evolution<br>Department of Anthropology, Durham University<br>United Kingdom of Great Britain and Northern Ireland<br>(the) |
| KOWALCZYK, Céline<br>PhD student<br>Hasselt University<br>Belgium                                                              | Kowalewski, Martin<br>Researcher/Primatologist<br>Estacion Biologica Corrientes - CONICET<br>Argentina                                                | Koziol, Krystyna<br>Earth Scientist, PhD<br>currently freelance<br>Poland                                                                                                   |
| Kozłowski, Jan<br>full professor/biology<br>Jagiellonian University<br>Poland                                                  | Kozovits, Alessandra<br>Full Professor/Ecosystem Ecology<br>Brazil                                                                                    | Kraaij, Tineke<br>Vegetation and fire ecology<br>Nelson Mandela University<br>South Africa                                                                                  |
| Krabbenhoft, Trevor<br>Postdoctoral Researcher<br>Wayne State University<br>United States of America (the)                     | Kraemer, Benjamin<br>Post-doctoral Research Fellow<br>IGB Leibniz institute for freshwater ecology and inland<br>fisheries<br>Germany                 | Kraemer, Robert<br>Professor/Physiology<br>Southeastern Louisiana University<br>United States of America (the)                                                              |
| Kraemer, Roland<br>Environmental Science<br>Germany                                                                            | Kraft, Derek<br>Ph.D Candidate in Marine Biology<br>Hawaii Institute of Marine Biology<br>United States of America (the)                              | Kraft, Fanny-Linn<br>PhD student of biology<br>Australia                                                                                                                    |
| Krajenbrink, Trudy<br>Post-doc, cognitive science<br>Switzerland                                                               | Krajnović, Marija<br>Master in Ecology and Environmental Protection (mag.<br>oecol. et prot. nat.)<br>Croatian Biological Research Society<br>Croatia | Králik, Michal<br>Survey/field worker - ecology<br>HBH projekt<br>Slovakia                                                                                                  |

|                                                                                                                                             |                                                                                                                                                                             |                                                                                                                                         |
|---------------------------------------------------------------------------------------------------------------------------------------------|-----------------------------------------------------------------------------------------------------------------------------------------------------------------------------|-----------------------------------------------------------------------------------------------------------------------------------------|
| Kramer, Lars<br>Master student<br>Vrije Universiteit Amsterdam<br>Netherlands (the)                                                         | Kramer, Marcelo A. F.<br>Biologist/Speleologist<br>Sociedade Espeleológica Potiguar<br>Brazil                                                                               | Krangel, Michael<br>Professor of Immunology<br>Duke University School of Medicine<br>United States of America (the)                     |
| Krantz, Gerald<br>Professor Emeritus, Department of Integrative Biology<br>Oregon State University<br>United States of America (the)        | Krapek, John<br>Agriculture<br>Krapek<br>United States of America (the)                                                                                                     | Krapp, Rupert<br>marine biologist<br>Norway's Arctic University - UiT<br>Norway                                                         |
| Krasnow, Kevin<br>Research and Graduate Faculty<br>Teton Science Schools Graduate Program<br>United States of America (the)                 | Kratochvil, Lukas<br>Professor of ecology<br>Charles University<br>Czech Republic (the)                                                                                     | Krauel, Jennifer<br>Research Specialist<br>University of Tennessee, Knoxville<br>United States of America (the)                         |
| Kraus, Brian<br>Graduate Research Assistant, Plasma Physics<br>Princeton University<br>United States of America (the)                       | Kraus, Robert H. S.<br>Biology<br>Max Planck Institute for Ornithology & University of<br>Konstanz<br>Germany                                                               | Krause, Maya<br>Anthropology<br>Vanderbilt University<br>United States of America (the)                                                 |
| Krauss, Jochen<br>Professor, Academic Researcher<br>Department of Animal Ecology and Tropical Biology,<br>University of Würzburg<br>Germany | Krauße, Thomas<br>PhD<br>Friedrich Schiller University Jena<br>Germany                                                                                                      | Kravec, Marcy<br>Associate Chair and Faculty, Biological Sciences<br>Florida International University<br>United States of America (the) |
| Krawinkel, Pia<br>Zooveterinary<br>Zoom Erlebniswelt Gelsenkirchen<br>Germany                                                               | Krebs, Isabel<br>Postdoc (Plasma Physics)<br>Princeton Plasma Physics Laboratory<br>United States of America (the)                                                          | Krebs, Julius<br>Environmental Sciences<br>University of Koblenz-Landau<br>Germany                                                      |
| Krebs-Kanzow, Uta<br>PostDoc Oceanography and Paleoclimate<br>Germany                                                                       | Kreft, Holger<br>Professor of Biodiversity, Macroecology and Biogeography<br>University of Goettingen<br>Germany                                                            | Kreft, Peter<br>Meteorologist<br>Meteorological Service of New Zealand Limited<br>New Zealand                                           |
| KREITER, Serge *<br>Professor-Dr, researcher and teacher<br>Montpellier SupAgro<br>France                                                   | Kreitzman, Maayan<br>PhD student, resources & environmental studies<br>Institute for Resource, Environment, and Sustainability,<br>University of British Columbia<br>Canada | Krell, Frank-Thorsten<br>Senior Curator of Entomology<br>Denver Museum of Nature & Science<br>United States of America (the)            |



|                                                                                                                                             |                                                                                                                              |                                                                                                                                          |
|---------------------------------------------------------------------------------------------------------------------------------------------|------------------------------------------------------------------------------------------------------------------------------|------------------------------------------------------------------------------------------------------------------------------------------|
| Kremer, Aspen<br>Graduate Student<br>Northern Illinois University<br>United States of America (the)                                         | Kremer, Colin<br>Postdoctoral Associate, Ecology<br>Michigan State University<br>United States of America (the)              | Krenn, Christoph<br>Senior Research Fellow<br>Max Planck Institute for Comparative Public Law and<br>International Law<br>Germany        |
| Kress, Monika<br>Professor and Chair, Department of Physics and<br>Astronomy<br>San Jose State University<br>United States of America (the) | Kretzmann, Jessica<br>PhD Candidate<br>The University of Western Australia<br>Australia                                      | Kreuzberg, Elena<br>International Consultant (Conservation Biology, EIA, SDGs)<br>Independent Consulting<br>Canada                       |
| Krevitz, Alex<br>Mammalogist<br>Kunak Ecological Studies<br>United States of America (the)                                                  | Krevitz, Alex<br>Mammalogist<br>Kumar Ecological Studies<br>United States of America (the)                                   | Krieger, William<br>Assoc Prof of Philosophy and Archaeologist<br>Univ of Rhode Island<br>United States of America (the)                 |
| Kriegsman, Leo<br>Senior Researcher, Geology<br>Naturalis Biodiversity Center<br>Netherlands (the)                                          | Krisai-Greilhuber, Irmgard<br>Ao.-Univ.-Prof., mycology<br>Dept. of Botany and Biodiversity, University of Vienna<br>Austria | Krisantini, Krisantini<br>Australia                                                                                                      |
| Krishna, Suraj<br>Graduate student, mathematics<br>Université Paris-Sud<br>France                                                           | Krishnadas, Meghna<br>PhD candidate<br>India                                                                                 | Krishnamurthy, Vijaykumar<br>Faculty, Biophysics<br>International Centre for Theoretical Sciences (ICTS-TIFR)<br>India                   |
| Krist, Amy<br>Associate Professor<br>University of Wyoming<br>United States of America (the)                                                | Kristensen, Eric<br>MA, MDiv<br>Retired<br>Canada                                                                            | Kriticos, Darren<br>Principal Research Scientist, Ecologist<br>CSIRO<br>Australia                                                        |
| KRL, Saranya<br>Research scholar<br>National remote sensing centre<br>India                                                                 | Kröber, Eileen<br>PostDoc (Microbial Ecology)<br>Leibniz Centre for Agricultural Landscape Research<br>Germany               | Krock, Bernd<br>Senior scientist/marine biology<br>Alfred Wegener Institut-Helmholtz Zentrum für Polar- nd<br>Meeresforschung<br>Germany |
| Kroening, Dubear<br>Professor of Biological Sciences<br>University of Wisconsin-Colleges Online<br>United States of America (the)           | Krofel, Miha<br>Ecology - Assistant Professor and Wildlife Researcher<br>University of Ljubljana<br>Slovenia                 | Kröger, Kerstin<br>Marine Ecology / Marine Monitoring<br>United Kingdom of Great Britain and Northern Ireland<br>(the)                   |
| Kroglund, Frode<br>Fish manager, County Governor<br>Count goverernor of Aust- and Vest-Agder<br>Norway                                      | Krohmer, Julia<br>Geoecology<br>Senckenberg Gesellschaft für Naturforschung<br>Germany                                       | Krohn, Christian<br>Graduate Student<br>Latrobe University Melbourne<br>Australia                                                        |

|                                                                                                                                                                      |                                                                                                                                                                      |                                                                                                                                                                                          |
|----------------------------------------------------------------------------------------------------------------------------------------------------------------------|----------------------------------------------------------------------------------------------------------------------------------------------------------------------|------------------------------------------------------------------------------------------------------------------------------------------------------------------------------------------|
| Krojerová, Jarmila<br>ecology and population genetics of vertebrates<br>Institute of Vertebrate Biology AS CR, v.v.i<br>Czech Republic (the)                         | Krokowski, Jan<br>Senior Specialist Scientist / Phycology<br>Scottish Environment Protection Agency<br>United Kingdom of Great Britain and Northern Ireland<br>(the) | Kronenberger, John<br>Ecology<br>Colorado State University<br>United States of America (the)                                                                                             |
| Kronfeld-schor, Noga<br>Chair, school of Zoology<br>Tel Aviv University<br>Israel                                                                                    | Kršinić, Frano<br>Prof. dr. sc. / Marine Biology<br>Institute of Oceanography and Fisheries, Split<br>Croatia                                                        | Krstic, Svetislav<br>Professor/Biology-Ecology<br>Faculty of Natural Sciences and Mathematics, "Ss. Cyril<br>and Methodius" University<br>Macedonia, Republic of (the former Yugoslavia) |
| Krueger, Fritz<br>Climate Research<br>GEOMAR, Kiel<br>Germany                                                                                                        | Krueger, Thomas<br>Postdoctoral Researcher/Coral Reef Biologist<br>École polytechnique fédérale de Lausanne<br>Switzerland                                           | Kruger, Ariel<br>PhD Candidate<br>Rutgers University<br>United States of America (the)                                                                                                   |
| Kruger, Ashley<br>Postdoctoral Fellow Palaeoanthropology<br>Evolutionary Studies Institute, University of the<br>Witwatersrand<br>South Africa                       | KRUIJT, Bart<br>Senior scientist carbon cycle, climate change and<br>Amazonia<br>Wageningen University and Research centre<br>Netherlands (the)                      | Krull, Cheryl<br>Lecturer<br>Auckland University of Technology<br>New Zealand                                                                                                            |
| Krumhardt, Kristen<br>PhD candidate, Environmental Studies<br>University of Colorado Boulder<br>United States of America (the)                                       | Kruse, Stefan<br>Researcher, Ecosystem Modelling & Population Genetics<br>Alfred-Wegener-Institute<br>Germany                                                        | Kruse, Stefan *<br>Doctoral researcher, Microbiology/Biochemistry<br>Insitute for Microbiology, Friedrich Schiller University<br>Germany                                                 |
| Krushelnycky, Paul<br>Ecologist<br>University of Hawaii<br>United States of America (the)                                                                            | Kruszynski, Cecilia<br>PhD candidate<br>Leibniz Institute for Zoo and Wildlife Research<br>Germany                                                                   | Kruuk, Loeske<br>University Professor<br>Australian National University<br>Australia                                                                                                     |
| Krzyzanowski, Judi<br>Owner and Principal Scientist (Air Quality, Climate<br>Change, Cumulative Effects, Environmental Science)<br>Krzyzanowski Consulting<br>Canada | Kubelka, Vojtěch<br>PhD student, Evolutionary ecology of birds<br>Charles University, Prague<br>Czech Republic (the)                                                 | Kubicek, Andreas<br>Germany                                                                                                                                                              |
| Kuchenreuther, Margaret<br>Associate Professor of Biology<br>University of Minnesota, Morris<br>United States of America (the)                                       | Kuchta, Shawn<br>Assistant Professor, Department of Biological Sciences<br>Ohio University<br>United States of America (the)                                         | Kuczenski, Brandon<br>Associate Researcher, Industrial Ecology<br>University of California, Santa Barbara<br>United States of America (the)                                              |

|                                                                                                                      |                                                                                                                                 |                                                                                                                         |
|----------------------------------------------------------------------------------------------------------------------|---------------------------------------------------------------------------------------------------------------------------------|-------------------------------------------------------------------------------------------------------------------------|
| Kuczyńska-Kippen, Natalia<br>Associate professor, Freshwater Ecology<br>Adam Mickiewicz University<br>Poland         | Kudalkar, Sahila<br>Conservation Biology<br>Centre for Wildlife Studies<br>India                                                | Kudryashov, Alexei<br>PhD Student<br>University of Augsburg<br>Germany                                                  |
| Kueffer, Christoph<br>Professor<br>University of Applied Sciences Eastern Switzerland & ETH<br>Zurich<br>Switzerland | Kuehne, Lauren<br>Aquatic Ecologist<br>University of Washington<br>United States of America (the)                               | Kuemmerle, Tobias<br>Professor for Conservation Biogeography<br>Humboldt-University Berlin<br>Germany                   |
| Kuemmerlen, Mathias<br>Postdoctoral researcher, freshwater ecology<br>Eawag<br>Switzerland                           | Kufel, Joanna<br>Prof/molecular biology<br>University of Warsaw<br>Poland                                                       | Kugbe, Joseph<br>Lecturer<br>University for Development Studies<br>Ghana                                                |
| Kuglerová, Lenka<br>Postdoctoral fellow, freshwater ecology<br>University of British Columbia<br>Canada              | Kühl, Hjalmar<br>Research group leader<br>iDiv, MPI EVAN<br>Germany                                                             | Kühl, Paulo<br>University of Campinas<br>Brazil                                                                         |
| Kühn, Ingolf *<br>Professor for Macroecology<br>Helmholtz Centre for Environmental Research - UFZ<br>Germany         | Kuijper, Dries<br>Associate professor<br>Mammal Research Institute, Polish Academy of Sciences<br>Poland                        | Kuiper, Timothy<br>PhD student<br>University of Oxford<br>United Kingdom of Great Britain and Northern Ireland<br>(the) |
| Kuipers, Marieke<br>em. professor of cultural heritage<br>Netherlands (the)                                          | Kujawa, Krzysztof<br>PhD, Ecology<br>Institute for Agricultural and Forest Environment, Polish<br>Academy of Sciences<br>Poland | Kuku, Aderemi *<br>Distinguished Professor of Mathematics<br>National Mathematical Centre, Abuja,<br>Nigeria            |
| Kulis, Januarie<br>Park Warden<br>Sarawak Forestry Corporation Sdn Bhd<br>Malaysia                                   | KÜLKÖYLÜOĞLU, OKAN<br>Prof.Dr. /Hydrobiology<br>ABANT İZZET BAYSAL UNIVERSITY<br>Turkey                                         | Kulmala, Markku<br>Academy Professor<br>University of Helsinki<br>Finland                                               |
| KUMAR, ANIL<br>Senior Director<br>M.S. SWAMINATHAN RESEARCH FOUNDATION<br>India                                      | Kumar, Dushyant<br>PhD Student<br>Senckenberg Biodiversity and Climate Research Center,<br>60325 Frankfurt am Main<br>Germany   | Kumar, Lokesh<br>Assistant Chemist<br>Delhi Jal Board, Government of NCT Delhi<br>India                                 |
| Kumari, Anitha<br>Scientist (Agricultural Extension)<br>Indian Council of Agricultural Research CPCRI<br>India       | Kuncheva, Zhana<br>Genetics Project Leader<br>C4X Discovery<br>United Kingdom of Great Britain and Northern Ireland<br>(the)    | Kunegel-Lion, Mélodie<br>PhD candidate<br>University of Alberta<br>Canada                                               |

|                                                                                                                         |                                                                                                                                      |                                                                                                                          |
|-------------------------------------------------------------------------------------------------------------------------|--------------------------------------------------------------------------------------------------------------------------------------|--------------------------------------------------------------------------------------------------------------------------|
| Kung, Carmen<br>Psycholinguistics<br>Macquarie University<br>Australia                                                  | Kunwar, Amar<br>Conservation Officer Wildlife Ecology<br>Small Mammals Conservation and Research Foundation<br>Nepal                 | Kunz, Daniele<br>Australia                                                                                               |
| Kunz, Natalie<br>Scientist & Lecturer in Botany and Ecology<br>University of Kaiserslautern<br>Germany                  | Kunzmann, Andreas<br>Ecophysiology / Aquaculture<br>ZMT - Leibniz Centre for Tropical Marine Research<br>Germany                     | Kuokkanen, Anna<br>Doctoral Researcher, Sustainability science<br>Lappeenranta University of Technology<br>Finland       |
| Kupetz, Marc<br>Limnologist<br>Leibniz-IGB Berlin<br>Germany                                                            | Kuppler, Jonas<br>Scientific assistant<br>Institute of Evolutionary Ecology & Conservation<br>Genomics, University of Ulm<br>Germany | Kupprat, Franziska<br>PhD student (Biology)<br>Institute for Freshwater Ecology and Inland Fisheries<br>Germany          |
| Kuprewicz, Erin<br>Assistant Research Professor<br>University of Connecticut<br>United States of America (the)          | Kupsch, Denis<br>Conservation Biologist<br>Georg-August-Universität Göttingen<br>Germany                                             | Kuralt, Žan<br>researcher<br>University of Ljubljana<br>Slovenia                                                         |
| Kurchin, Rachel<br>PhD Student<br>MIT<br>United States of America (the)                                                 | Kuria, Charles<br>Forester<br>Kenya Forest Service<br>Kenya                                                                          | Kursar, Thomas<br>Professor of Biology<br>University of Utah<br>United States of America (the)                           |
| Kurth, Elizabeth<br>Senior Faculty Research Assistant<br>Oregon State University<br>United States of America (the)      | Kurtz, Kirsten<br>Manager, Cornell Soil Health Laboratory<br>Cornell University<br>United States of America (the)                    | Kurtz, Markus Peter<br>Research assistant in soil and environmental chemistry<br>University of Koblenz-Landau<br>Germany |
| Kurtz, Stanley<br>Professor of Astrophysics<br>National Autonomous University of Mexico<br>Mexico                       | Kurvers, Ralf<br>Research Scientist. Collective Behavior<br>Max Planck Institute for Human Development<br>Germany                    | Kusak, Josip<br>Professor of zoology<br>Veterinary faculty, University of Zagreb<br>Croatia                              |
| Kuserk, Frank<br>Louise E. Juley Professor of Biological Sciences<br>Moravian College<br>United States of America (the) | Kusi, Nana<br>PhD Student<br>Texas Tech University<br>United States of America (the)                                                 | Kusi, Naresh<br>Wildlife Researcher<br>Resources Himalaya Foundation<br>Nepal                                            |
| Kusmanoff, Alex<br>Interdisciplinary Conservation Scientist<br>RMIT University<br>Australia                             | Kutal, Miroslav<br>Zoology<br>Department of Forest Ecology, Mendel University in Brno<br>Czech Republic (the)                        | Kutt, Alex<br>Manager and Ecologist, Arid and Riverine Ecosystems<br>Bush Heritage Australia<br>Australia                |

|                                                                                                                                                          |                                                                                                                          |                                                                                                                                   |
|----------------------------------------------------------------------------------------------------------------------------------------------------------|--------------------------------------------------------------------------------------------------------------------------|-----------------------------------------------------------------------------------------------------------------------------------|
| Kutter Krolow, Tiago<br>Assistant teacher/Zoologist<br>Federal University of Tocantins<br>Brazil                                                         | Kuusela, Saija<br>Ecology<br>Finnish Environment Institute<br>Finland                                                    | Kuyper, Nick<br>Senior Herpetologist<br>Australia Zoo<br>Australia                                                                |
| Kvale, Karin<br>Scientific Programmer<br>GEOMAR<br>Germany                                                                                               | Kvist, Sebastian<br>Associate Curator of Invertebrates<br>Royal Ontario Museum<br>Canada                                 | Kwasniewski, Slawomir<br>Researcher, Marine Ecology and Biology<br>Institute of Oceanology, Polish Academy of Sciences<br>Poland  |
| Kwiatowski, Jan<br>Professor of Evolutionary Biology<br>Faculty of Biology, University of Warsaw<br>Poland                                               | Kwok, Rosanna<br>Molecular Biology PhD<br>University of California, Davis<br>United States of America (the)              | Kyle, Scotty<br>Section Head Scientific Services<br>Ezemvelo KZN Wildlife South Africa<br>South Africa                            |
| Kylin, Henrik<br>Professor of Environmental Change/Environmental<br>Chemistry<br>Linkoping University<br>Sweden                                          | Kylling, Arve<br>Atmospheric scientist<br>NILU - Norwegian Institute for Air Research<br>Norway                          | Kyriakopoulou, Evangelia<br>Netherlands (the)                                                                                     |
| Kythreotis, Andrew<br>Assistant Professor/Environmental Geography<br>Cardiff University<br>United Kingdom of Great Britain and Northern Ireland<br>(the) | L. B. Magalhães, André<br>Postdoctoral Researcher/Invasive Species<br>Universidade Federal de São João Del Rei<br>Brazil | L. G. Raimundo, Rafael<br>Adjunct Professor (Ecology)<br>Federal University of Paraíba<br>Brazil                                  |
| L. Guilherme, João<br>Independent Researcher in Ecology and Ornithology<br>Portugal                                                                      | L.M.P. de Lima, João<br>Prof.<br>University of Coimbra<br>Portugal                                                       | La Hood, Samantha<br>Undergraduate student (Bachelor Applied Science -<br>Animal Management and Welfare)<br>Unitec<br>New Zealand |
| La Puma MD, John<br>Director and Founder<br>Chef Clinic<br>United States of America (the)                                                                | La Serra, Leonardo *<br>Researcher<br>University of São Paulo<br>Brazil                                                  | La Torre Cuadros, Maria de los Angeles<br>Visiting Professor<br>Universidad Nacional Agraria La Molina<br>Peru                    |
| Laanisto, Lauri<br>research scientist<br>Estonian University of Life Sciences<br>Estonia                                                                 | Laban, Njoroge<br>Entomologist<br>The National Museums of Kenya<br>Kenya                                                 | Labba, Nils-Anders<br>PhD, pharmacotoxicology<br>School of Pharmacy, University of Oslo<br>Norway                                 |
| Labbé, Pierrick<br>Assistant Professor<br>Montpellier University<br>France                                                                               | Labocha-Derkowska, Marta<br>Biology<br>Jagiellonian University<br>Poland                                                 | Labonne, Jacques<br>Researcher<br>INRA<br>France                                                                                  |

|                                                                                                                       |                                                                                                                        |                                                                                                                                                            |
|-----------------------------------------------------------------------------------------------------------------------|------------------------------------------------------------------------------------------------------------------------|------------------------------------------------------------------------------------------------------------------------------------------------------------|
| Laborda, Ignacio<br>Nanotechnology<br>Universidad de la Republica<br>Uruguay                                          | Labrut, Sophie<br>Oniris<br>France                                                                                     | Labuto, Geórgia<br>Professor/chemistry<br>Universidade Federal de São Paulo<br>Brazil                                                                      |
| Lacava, Mariangeles<br>University professor of ecology<br>Universidad de la República<br>Uruguay                      | LaCava, Melanie<br>PhD student<br>University of Wyoming<br>United States of America (the)                              | Lacave Lena, Jose Maria<br>Researcher in Cell Biology in Environmental Toxicology<br>University of the Basque Country (UPV/EHU)<br>Spain                   |
| Lacayo Victory, Christine<br>Youth Projects Earth Charter International<br>Earth Charter International<br>Costa Rica  | Lach, Lori<br>ecologist<br>James Cook University, Cairns<br>Australia                                                  | Lachaise, Tom<br>PhD student<br>Universität Konstanz<br>Germany                                                                                            |
| Lachenaud, Olivier<br>Botanist<br>Botanic Garden Meise<br>Belgium                                                     | Lacher, Thomas<br>Professor<br>Texas A&M University<br>United States of America (the)                                  | Lachman, Jamie<br>Research Fellow, Social Policy and Intervention<br>University of Oxford<br>United Kingdom of Great Britain and Northern Ireland<br>(the) |
| Lachmuth, Susanne<br>Researcher and lecturer in Plant Ecology<br>Martin Luther University Halle Wittenberg<br>Germany | Lackmann, Malte<br>Mathematics<br>Universität Bonn<br>Germany                                                          | LACOMBA, IGNACIO<br>BIOLOGIST, PhD<br>REGIONAL MINISTRY OF ENVIRONMENT<br>Spain                                                                            |
| Lacombe, Eric<br>Associate Professor<br>Université montpellier<br>France                                              | Lacruz, Andrea<br>Biology<br>Instituto Venezolano de Investigaciones Cientificas<br>Venezuela (Bolivarian Republic of) | Ladd, Mark<br>Phd Candidate, Marine Ecology<br>University of California Santa Barbara<br>United States of America (the)                                    |
| Ladeira, Gustavo<br>Masters student, Ecology<br>INPA<br>Brazil                                                        | Ladin, Emily<br>Marine Biologist<br>California State University Northridge<br>United States of America (the)           | ladio, ana<br>researcher<br>inibioma<br>Argentina                                                                                                          |
| Ladle, Richard<br>Titular Professor of Conservation Biogeography<br>Federal University of Alagoas<br>Brazil           | Ladrón de Guevara, Mónica<br>Universidad Rey Juan Carlos<br>Spain                                                      | LaDuke, Thomas<br>Associate Professor, Department of Biological Sciences<br>East Stroudsburg University of Pennsylvania<br>United States of America (the)  |
| Lafon, Michel<br>Linguistics - retired<br>Llacan - Cnrs (retired)<br>France                                           | Lafontaine, René-Marie<br>Conservation Biologist<br>Royal Belgian Institute of Natural Sciences<br>Belgium             | Lagesson, Annelie<br>PhD Student<br>Department of Ecology and Environmental Science,<br>Umeå University<br>Sweden                                          |

|                                                                                                                                                            |                                                                                                                                                                                  |                                                                                                                                                                                              |
|------------------------------------------------------------------------------------------------------------------------------------------------------------|----------------------------------------------------------------------------------------------------------------------------------------------------------------------------------|----------------------------------------------------------------------------------------------------------------------------------------------------------------------------------------------|
| Lago Souza, Vera Lúcia do<br>Professora - História da Educação - Curso de Pedagogia<br>Universidade do Estado de Minas Gerais<br>Brazil                    | Lago-Paiva, Celso<br>Analista Ambiental<br>ICMBio/ Ministério do Meio Ambiente<br>Brazil                                                                                         | LAGUNA FERNANDEZ, EDUARDO<br>PhD STUDENT IN WILDLIFE MANAGEMENT AND<br>EPIDEMIOLOGY<br>INSTITUTO DE INVESTIGACIÓN EN RECURSOS<br>CINEGÉTICOS, IREC (UCLM-CSIC-JCCM)<br>Spain                 |
| Laguna-Lumbreras, Emilio<br>Head of Section, Plant Conservation<br>CIEF - Wildlife Service, Generalitat Valenciana<br>Spain                                | Lahm, Sally<br>Assistant Professor of Research, Department of<br>Epidemiology and Environmental Health<br>University at Buffalo (SUNY Buffalo)<br>United States of America (the) | Laidlaw, Mark<br>Vice Chancellors Postdoctoral Fellow<br>RMIT University<br>Australia                                                                                                        |
| Laigle, Idaline<br>Ecology, PhD<br>Canada                                                                                                                  | Laine, Veronika<br>NIOO-KNAW<br>Netherlands (the)                                                                                                                                | Laing, Ingrid<br>Senior Research Fellow<br>University of Western Australia<br>Australia                                                                                                      |
| Laitung, Beryl<br>Associate Professor<br>University of Burgundy<br>France                                                                                  | Lake, Nicole<br>Wildlife Biology / Environmental Education<br>United States of America (the)                                                                                     | Lakhtakia, Akhlesh<br>Charles Godfrey Binder Professor of Engineering Science<br>and Mechanics<br>Pennsylvania State University<br>United States of America (the)                            |
| Lallemand, Félix<br>PhD Student Ecology<br>Muséum national d'Histoire naturelle<br>France                                                                  | Lamberson, Roland<br>Emeritus Professor<br>Humboldt State University<br>United States of America (the)                                                                           | Lambert, Amaury<br>Professor, mathematics<br>UPMC Univ Paris 06 & Collège de France<br>France                                                                                                |
| Lambert, Joanna *<br>Professor, Environmental Studies and Biological<br>Anthropology<br>University of Colorado - Boulder<br>United States of America (the) | Lambert, Matthew<br>Postdoctoral scholar<br>Oregon Health & Science University<br>United States of America (the)                                                                 | LAMBERTUCCI, SERGIO A.<br>Investigador Científico, Conservation Biology<br>Grupo de Investigaciones en Biología de la Conservación,<br>INIBIOMA (CONICET-Uni. Nac. del Comahue)<br>Argentina |
| Lambin, Xavier<br>Professor of Ecology<br>University of Aberdeen<br>United Kingdom of Great Britain and Northern Ireland<br>(the)                          | Lamers, Carolien<br>Consultant Clinical Psychologist<br>Bangor University<br>United Kingdom of Great Britain and Northern Ireland<br>(the)                                       | Lamichhane, Jay Ram<br>Research Scientist<br>INRA<br>France                                                                                                                                  |
| Lamim-Guedes, Valdir<br>Professor of Environmental Education<br>Centro Universitário Senac (São Paulo-SP)<br>Brazil                                        | Lamin, Paul A.<br>Head of Natural Resources Management Department<br>Environment Protection Agency<br>Sierra Leone                                                               | Laming, Sven<br>Postdoctoral researcher, Developmental biology and<br>symbiont integration in the deep-sea<br>Ifremer<br>France                                                              |

|                                                                                                                                |                                                                                                                                                                         |                                                                                                                                      |
|--------------------------------------------------------------------------------------------------------------------------------|-------------------------------------------------------------------------------------------------------------------------------------------------------------------------|--------------------------------------------------------------------------------------------------------------------------------------|
| Lammel, Gerhard<br>Professor, senior scientist<br>Max Planck Institute for Chemistry & Masaryk University<br>Germany           | Lammel, Tobias<br>Environmental Toxicologist<br>University of Gothenburg<br>Sweden                                                                                      | Lammers, Mark<br>PhD candidate in evolutionary ecology<br>Dept. of Animal Ecology, Vrije Universiteit Amsterdam<br>Netherlands (the) |
| Lamping, Nele<br>PhD Student Marine Geology<br>Alfred-Wegener Institute<br>Germany                                             | Lamprecht, Andrea<br>Junior scientist, High mountain ecology<br>GLORIA, BOKU-ÖAW<br>Austria                                                                             | Land, Peter<br>researcher<br>Plymouth Marine Laboratory<br>United Kingdom of Great Britain and Northern Ireland<br>(the)             |
| Landeira, Jose Maria<br>JSPS postdoctoral fellow/ Marine Biology<br>Tokyo University of Marine Science and Technology<br>Japan | Landing, Dr. Ed<br>New York State Paleontologist, emeritus<br>New York State Museum<br>United States of America (the)                                                   | Landman, Marietjie<br>Postdoctoral Research Fellow<br>Nelson Mandela University<br>South Africa                                      |
| Landolt, John<br>Research Professor of Biology, Emeritus<br>Shepherd University<br>United States of America (the)              | Landry, Bernard<br>Museum Curator in Entomology<br>Muséum d'histoire naturelle, Geneva<br>Switzerland                                                                   | Landschoff, Jannes<br>PhD candidate marine biology<br>University of Cape Town<br>South Africa                                        |
| Lang, David<br>Biology Professor<br>Glendale Community College, Glendale, AZ<br>United States of America (the)                 | Lang, Judith<br>Scientific Advisor<br>Atlantic and Gulf Rapid Reef Assessment<br>United States of America (the)                                                         | Lang, Richard<br>Senior Research Fellow<br>Monash University<br>Australia                                                            |
| Lang, Zsolt<br>mathematician, PhD<br>University of Veterinary Medicine Budapest<br>Hungary                                     | Langan, Laura<br>Post doc scientist in animal alternatives for toxicity testing<br>Plymouth University<br>United Kingdom of Great Britain and Northern Ireland<br>(the) | Langan, Liam<br>Ph.D. student<br>Senckenberg<br>Germany                                                                              |
| Langbehn, Tom<br>PhD Student   Ecology, Evolution, Marine Biology<br>University of Bergen<br>Norway                            | Lange, Benjamin A.<br>PostPostdoctoral Fellow, Physical Ecology of Polar<br>Environments<br>Canada                                                                      | Langeani, Francisco<br>Full Professor<br>UNESP<br>Brazil                                                                             |
| Langellotto, Gail<br>Associate Professor of Horticulture<br>Oregon State University<br>United States of America (the)          | Langen, Tom<br>Professor, Dept. of Biology<br>Clarkson University<br>United States of America (the)                                                                     | Langer, Julia<br>PhD Student<br>Alfred-Wegener-Institut Helmholtz-Zentrum für Polar-<br>und Meeresforschung<br>Germany               |
| Langer, Torben<br>Master of International Nature Conservation<br>Germany                                                       | Langkilde, Tracy<br>Professor and Department Head of Biology<br>Pennsylvania State University<br>United States of America (the)                                         | Langmore, John<br>Biologist<br>University of Michigan<br>United States of America (the)                                              |



|                                                                                                                                                                                                                                                 |                                                                                                                 |                                                                                                                                                      |
|-------------------------------------------------------------------------------------------------------------------------------------------------------------------------------------------------------------------------------------------------|-----------------------------------------------------------------------------------------------------------------|------------------------------------------------------------------------------------------------------------------------------------------------------|
| Langmore, Naomi<br>Associate Professor of Evolutionary Ecology<br>Australian National University<br>Australia                                                                                                                                   | Langor, David<br>Senor Research Scientist<br>Natural Resources Canada<br>Canada                                 | Laniran, Paul Tolulope<br>Nigeria                                                                                                                    |
| Lanna, Andre<br>PhD Student<br>UFRJ<br>Brazil                                                                                                                                                                                                   | Lanna, Emilio<br>Professor / Biological Sciences<br>Universidade Federal da Bahia<br>Brazil                     | Lanna, Flávia<br>Master in Ecology<br>Universidade Federal do Rio Grande do Norte<br>Brazil                                                          |
| Lannig, Gisela<br>PhD Biology<br>Alfred Wegener Institute Helmholtz Center for Polar &<br>Marine Research<br>Germany                                                                                                                            | Lanning, Seth<br>Stream Ecologist<br>United States of America (the)                                             | Lansdown, Richard<br>Ecologist, Chair<br>IUCN SSC Freshwater Plant Specialist Group<br>United Kingdom of Great Britain and Northern Ireland<br>(the) |
| Lansing, Stephen<br>Director, Complexity Institute<br>Nanyang Technological University<br>Singapore                                                                                                                                             | Lansø, Anne Sofie<br>Post doctoral researcher<br>LSCE<br>France                                                 | Lantyer-Silva, Amanda<br>PhD Student/ Zoology<br>UNESP<br>Brazil                                                                                     |
| Lantz, Samantha<br>Lecturer, Ecology<br>CSU Channel Islands<br>United States of America (the)                                                                                                                                                   | Lanzaco, Bethania<br>Chemist - PhD Student<br>Universidad Nacional de Cordoba<br>Argentina                      | Lapa, Mariana<br>MS Student<br>Portugal                                                                                                              |
| Laparie, Mathieu<br>Research Scientist (Biology, Ecology)<br>Forest Zoology Research Unit (URZF), INRA, Orléans,<br>FRANCE; Norwegian Institute for Nature Research (NINA) -<br>The Arctic University of Norway (UiT), Tromsø, NORWAY<br>France | Laplaze, Laurent<br>Directeur de Recherche<br>IRD<br>France                                                     | Laporte, Martin<br>Biology<br>Université Laval<br>Canada                                                                                             |
| Lapuz, Ralph Sedricke<br>PhD Student in Ecology<br>Xishuangbanna Tropical Botanical Garden, Chinese<br>Academy of Sciences<br>Philippines (the)                                                                                                 | Lara, Yannick<br>Microbial Ecology<br>University of Liège<br>Belgium                                            | Lara Romero, Carlos<br>Postdoctoral researcher<br>Mediterranean Institute for Advanced Studies<br>(IMEDEA/CSIC)<br>Spain                             |
| Laranjeiras, Thiago<br>Analista Ambiental<br>Instituto Chico Mendes de Conservação da Biodiversidade<br>Brazil                                                                                                                                  | Larke, Charmian<br>Renewable energy technology<br>United Kingdom of Great Britain and Northern Ireland<br>(the) | Larkin, Kay<br>United States of America (the)                                                                                                        |

|                                                                                                                             |                                                                                                                      |                                                                                                                                                                                                   |
|-----------------------------------------------------------------------------------------------------------------------------|----------------------------------------------------------------------------------------------------------------------|---------------------------------------------------------------------------------------------------------------------------------------------------------------------------------------------------|
| Larkum, Anthony *<br>Emeritus Professor<br>University of Sydney<br>Australia                                                | Larney, Eileen<br>Wildlife Conservation<br>Conservation International<br>United States of America (the)              | Larocque, Guillaume<br>Research professional<br>McGill University<br>Canada                                                                                                                       |
| Larraín Barrios, Bárbara<br>MSc, PhD candidate (Ecology)<br>Universidad Nacional Autónoma de México<br>Chile                | Larrañaga, Aitor<br>Lecturer<br>University of the Basque Country<br>Spain                                            | Larrinaga, Asier R.<br>Assistant Researcher and Environmental Consultant, on<br>plant ecology, plant-animal interactions and conservation<br>Spanish Research Council (CSIC) and eNeBaDa<br>Spain |
| Larroque, Jeremy<br>Postdoctoral Research Fellow<br>Université de Montréal<br>Canada                                        | Larroux, Claire<br>Postdoctoral research fellow<br>University of Queensland<br>Australia                             | Larrue, Sébastien<br>Senior lecturer<br>University Clermont Auvergne<br>France                                                                                                                    |
| Larsen, Elisabeth Karlstad<br>PhD student, Ecology<br>El Centro de Estudios Ambientales del Mediterráneo<br>(CEAM)<br>Spain | Larsen, Peter<br>Associate Professor, Surgery and Anaesthesia<br>University of Otago<br>New Zealand                  | Larson, Helen<br>Emeritus Curator of Fishes<br>Australia                                                                                                                                          |
| Larsson, Lena<br>PhD<br>Sutton Avian Research Center<br>United States of America (the)                                      | Larsson, Michaela<br>University of Technology Sydney<br>Australia                                                    | Lashley, Marcus<br>Assistant Professor<br>Mississippi State university<br>United States of America (the)                                                                                          |
| Lasser, Laurent<br>Belgium                                                                                                  | Lasso, Eloisa<br>Associate Professor Biology<br>Universidad de los Andes<br>Colombia                                 | LAST, John *<br>Emeritus professor of epidemiology<br>University of Ottawa, Ottawa, Ontario<br>Canada                                                                                             |
| Latella, Leonardo<br>Curator of Zoology<br>Museo Civico di Storia Naturale of Verona, Zoology<br>Department<br>Italy        | Laterza Barbosa, Júlia<br>Herpetology<br>John Carroll University<br>Brazil                                           | Latino, Diogo<br>Scientist<br>Eawag<br>Switzerland                                                                                                                                                |
| Latorre, Claudio<br>Professor<br>Pontificia Universidad Catolica de Chile<br>Chile                                          | Latorre, Dani<br>PhD student. Research Group on Ecology of Inland<br>Waters (GRECO)<br>University of Girona<br>Spain | Latorre, Lucía<br>Spain                                                                                                                                                                           |

|                                                                                                                                     |                                                                                                                                                             |                                                                                                                                 |
|-------------------------------------------------------------------------------------------------------------------------------------|-------------------------------------------------------------------------------------------------------------------------------------------------------------|---------------------------------------------------------------------------------------------------------------------------------|
| Latour, Jordan<br>M. Sc. student in Oceanography<br>Institut des Sciences de la Mer à Rimouski (ISMER)<br>Canada                    | Lattke, John<br>Professor of Entomology<br>Universidade Federal do Paraná<br>Brazil                                                                         | Lau, Danny Chun Pong<br>Assistant Professor<br>Department of Ecology and Environmental Science,<br>Umeå University<br>Sweden    |
| Lau, Mari<br>Ecologist<br>Scottish Environmental Protection Agency<br>United Kingdom of Great Britain and Northern Ireland<br>(the) | Laubichler, Manfred<br>President's Professor of Theoretical Biology and History<br>of Biology<br>Arizona State University<br>United States of America (the) | Lauda Rodriguez, Zenaida Luisa<br>PhD candidate<br>Institute of Energy and Environmental - University of Sao<br>Paulo<br>Brazil |
| Lauer, Oliver<br>PhD Student Multiphase Chemistry<br>Max Planck Institute for Chemistry<br>Germany                                  | Laugen, Ane Timenes<br>Senior Scientist<br>Novia University of Applied Sciences<br>Finland                                                                  | Laughinghouse, Dail<br>Asst. Professor of Applied Phycology<br>University of Florida / IFAS<br>United States of America (the)   |
| Laughlin, Daniel<br>Associate Professor<br>University of Wyoming<br>United States of America (the)                                  | Laumann, Raul<br>Researcher / Professor - Chemical Ecology<br>Embrapa Genetic Resources and Biotechnology<br>Brazil                                         | Laundré, John<br>Ecology<br>Western Oregon University<br>United States of America (the)                                         |
| Laurans, Marilyne<br>Researcher<br>CIRAD<br>France                                                                                  | Laurenson, Laurie<br>Associate Prof<br>Deakin University<br>Australia                                                                                       | Laurent, Estelle<br>PhD student in Ecology<br>UCL<br>Belgium                                                                    |
| laurent serge, ndengue mekong<br>PhD student<br>university of Dschang<br>Cameroon                                                   | Laureto, Livia Maira<br>Brazil                                                                                                                              | LAURI, Pierre-Eric<br>Senior Scientist<br>INRA<br>France                                                                        |
| Laur, Michael<br>Fisheries Oceanographer<br>Retired<br>United States of America (the)                                               | Lauterbur, M. Elise<br>Ecology and Evolution<br>Stony Brook University<br>United States of America (the)                                                    | Lauzier, Benjamin<br>associate professor<br>nantes university<br>France                                                         |
| Lavaggi, Maria Laura<br>Professor<br>Universidad de la Republica<br>Uruguay                                                         | Lavagnoli, Sergio<br>Assistant Professor<br>von Karman Institute for Fluid Dynamics<br>Belgium                                                              | LaVal, Richard<br>Mammalogist<br>The Bat Jungle<br>Costa Rica                                                                   |
| LaVanchy, Thomas<br>Visiting Teaching Assistant Professor<br>University of Denver<br>United States of America (the)                 | Lavazza, Antonio<br>Veterinary Diagnostician<br>Istituto Zooprofilattico Sperimentale della Lombardia e<br>dell'Emilia Romagna<br>Italy                     | Lavergne, Sébastien<br>Research scientist<br>CNRS - Université Grenoble Alpes<br>France                                         |

|                                                                                                                                                                   |                                                                                                                                               |                                                                                                                                                            |
|-------------------------------------------------------------------------------------------------------------------------------------------------------------------|-----------------------------------------------------------------------------------------------------------------------------------------------|------------------------------------------------------------------------------------------------------------------------------------------------------------|
| Lavers, Jennifer<br>Research Scientist<br>University of Tasmania<br>Australia                                                                                     | Lavigne, Claire<br>researcher<br>INRA<br>France                                                                                               | Lavine, Michael<br>Professor of Statistics<br>UMass Amherst<br>United States of America (the)                                                              |
| Lavoie, Isabelle<br>Freshwater Biomonitoring<br>INRS-ETE<br>Canada                                                                                                | Lavrador, Catarina<br>Assistant professor<br>University of Évora, Portugal<br>Portugal                                                        | Lavrov, Dennis<br>Associate Professor in the Dept. of Ecology, Evolution and Organismal Biology<br>Iowa State University<br>United States of America (the) |
| Law, Beverly<br>Professor, Global Change Biology & Terrestrial Systems Science<br>Oregon State University<br>United States of America (the)                       | Law, Bradley<br>Wildlife Ecologist<br>UNSW/UNE<br>Australia                                                                                   | Law, Elizabeth<br>Postdoctoral Research Scientist - Environmental Science<br>Canada                                                                        |
| Law, Peter<br>Mathematical modeller<br>United States of America (the)                                                                                             | Lawing, A. Michelle<br>Assistant Professor<br>Texas A&M University<br>United States of America (the)                                          | Lawley, Jonathan<br>MSc. in Zoology Student<br>Instituto de Biociências, Universidade de São Paulo<br>Brazil                                               |
| Lawrence, Alistair<br>Professor of Animal Behaviour and Welfare<br>SRUC and University of Edinburgh<br>United Kingdom of Great Britain and Northern Ireland (the) | Lawrence, Andrew<br>Professor of Marine Conservation<br>University of Chester<br>United Kingdom of Great Britain and Northern Ireland (the)   | Lawrence, Andrew<br>PhD Student<br>New Mexico State University<br>United States of America (the)                                                           |
| Lawrence, Deborah<br>Professor of Environmental Sciences<br>University of Virginia<br>United States of America (the)                                              | Lawrence, John<br>Retired Reserach Scienist. Evolutionary bi9ology,<br>Entomology<br>CSIRO Australian National Insect Collection<br>Australia | Lawson, Dawn<br>Adjunct Faculty, Ecologist<br>San Diego State University<br>United States of America (the)                                                 |
| Lawton, Harriet<br>Undergraduate<br>Bangor University<br>United Kingdom of Great Britain and Northern Ireland (the)                                               | Laza-Martínez, Aitor<br>Marine Biology Researcher<br>University of the Basque Country (UPV/EHU)<br>Spain                                      | Lázaro, Roberto<br>Tenured scientist / terrestrial ecology<br>CSIC (Spanish National Research Council)<br>Spain                                            |
| Lázaro, Wilkinson<br>Researcher<br>Universidade do Estado de Mato Grosso<br>Brazil                                                                                | Lazaro-Carrillo, Ana<br>Assistant professor cellular biology<br>Universidad Autónoma de Madrid<br>Spain                                       | Lazoski, Cristiano<br>Genetics Professor<br>UFRJ<br>Brazil                                                                                                 |

|                                                                                                                          |                                                                                                                        |                                                                                             |
|--------------------------------------------------------------------------------------------------------------------------|------------------------------------------------------------------------------------------------------------------------|---------------------------------------------------------------------------------------------|
| LC Dayrell, Roberta<br>PhD candidate<br>Universidade Federal de Minas Gerais - UFMG<br>Brazil                            | Le, Quang Bao<br>Senior Scientist<br>International Center for Agricultural Research in Dry<br>Areas (ICARDA)<br>Jordan | Le Billon, Philippe<br>Professor, Geography<br>University of British Columbia<br>Canada     |
| Le Blay, Gwenaëlle<br>Professor<br>University of Brest<br>France                                                         | Le Chevalier, Hugo<br>Research Engineer<br>CNRS<br>France                                                              | Le Corre, Valérie<br>Researcher, evolutionary biology and ecology<br>INRA<br>France         |
| Le Cozannet, Gonéri<br>Research engineer<br>French geological survey<br>France                                           | Le Dantec, Nicolas<br>Researcher in coastal sediment dynamics<br>Cerema<br>France                                      | le Grange, Anja<br>Zoologist<br>University of Pretoria<br>South Africa                      |
| Le Lann, Cécile<br>Associate professor<br>University of Rennes1<br>France                                                | Le Roux, Elizabeth<br>Postdoctoral Fellow in Ecology<br>Nelson Mandela University<br>South Africa                      | Le Roux, Johannes<br>Associate Professor<br>Stellenbosch University<br>South Africa         |
| Le Roux, Vincent<br>Lecturer in insect ecology<br>CNRS / University of Picardie Jules Verne<br>France                    | LE ROUX, Xavier<br>Senior scientist, and BiodivERSA Coordinator & CEO<br>INRA & FRB<br>France                          | Le Souëf, Peter<br>Professor of Paediatrics<br>University of Western Australia<br>Australia |
| Le Stradic, Soizig<br>Post-doctoral fellow, Ecology<br>UNESP Universidade Estadual Paulista, Brazil<br>Brazil            | Le Surf, Fiona<br>Veterinarian<br>Australia                                                                            | Le Vaillant, Justine<br>PhD student<br>Research Unit of Biodiversity (CSIC/UO/PA)<br>Spain  |
| Le Viol, Isabelle<br>Researcher, lecturer. Biodiversity Conservation<br>Museum National d'Histoire naturelle<br>France   | Lea, Jessica<br>Ecologist<br>United Kingdom of Great Britain and Northern Ireland<br>(the)                             | Leach, Michael<br>Author/Environmental Studies<br>United States of America (the)            |
| Leal, Adrielle<br>Mestranda em Ecologia e Conservação da Biodiversidade<br>Universidade Estadual de Santa Cruz<br>Brazil | Leal, Antonio<br>Science disclosure technician<br>Centro de Ciencia de Angra do Heroismo Science Centre<br>Portugal    | Leal, Camille Victória<br>PhD student<br>Universidade Federal do Rio de Janeiro<br>Brazil   |
| Leal, Inara<br>Professor<br>Universidade Federal de Pernambuco<br>Brazil                                                 | Leandro, Camila<br>PhD Student - Conservation Biology<br>CEFE-UPVM3<br>France                                          | Leão-Pires, Thiago Augusto<br>PhD student<br>UNICAMP<br>Brazil                              |

|                                                                                                                             |                                                                                                                                    |                                                                                                                                                      |
|-----------------------------------------------------------------------------------------------------------------------------|------------------------------------------------------------------------------------------------------------------------------------|------------------------------------------------------------------------------------------------------------------------------------------------------|
| Leary, John<br>Environmental Science and Policy MS Student<br>Northern Arizona University<br>United States of America (the) | Leathem, Jamie<br>Ecosystems Biologist<br>BC Ministry of Forests, Lands, Natural a Resource Ops<br>and Rural Development<br>Canada | Leather, Simon<br>Professor of Entomology<br>Harper Adams University<br>United Kingdom of Great Britain and Northern Ireland<br>(the)                |
| Leavitt, Steve<br>Brigham Young University<br>United States of America (the)                                                | Lebed, Victoria<br>Research Fellow, Mathematics<br>Trinity College Dublin<br>Ireland                                               | Leberger, Roxanne<br>PhD<br>German Centre for Integrative Biodiversity Research<br>(iDiv) Halle-Jena-Leipzig<br>Germany                              |
| Leblans, Niki Ines Walter<br>PhD Biology<br>University of Antwerp and Agrigultural University of<br>Iceland<br>Belgium      | Leblans, Paul<br>Manager Technology & Innovation<br>Agfa HealthCare NV<br>Belgium                                                  | Leblois, Raphael<br>Researcher<br>French National Institute for Agronomical Reasearch<br>(INRA)<br>France                                            |
| Leblond, Mathieu<br>Research Scientist<br>Environment and Climate Change Canada<br>Canada                                   | Lebouvier, Marc<br>Research Engineer in Ecology<br>CNRS<br>France                                                                  | Lebreton, Jean-Dominique<br>Emeritus director of Research<br>CNRS<br>France                                                                          |
| Lebreton, Sébastien<br>Postdoctoral fellow<br>Aix-Marseille university<br>France                                            | LECAROS BUSTAMANTE, EMILIO MARTIN *<br>ENTOMOLOGIST<br>LECAROS BUSTAMANTE<br>Peru                                                  | Lecce, Scott<br>Professor of Geography and Geomorphology<br>East Carolina University<br>United States of America (the)                               |
| Lecina-Diaz, Judit<br>Ph.D candidate<br>CREAF<br>Spain                                                                      | Leckie, Leo<br>Research Associate<br>A Naturalist's World<br>United States of America (the)                                        | Leclerc, Martin<br>Ph.D. in biology<br>Université de Sherbrooke<br>Canada                                                                            |
| Lecollinet, Sylvie<br>Scientist in biology<br>ANSES<br>France                                                               | Lecours, Natacha<br>Program Officer, Food, Environment and Health Program<br>IDRC<br>Canada                                        | Lecours, Vincent<br>Assistant Professor in Marine Remote Sensing &<br>Geospatial Analysis<br>University of Florida<br>United States of America (the) |
| Ledda, Julieta<br>Alumno<br>Facultad de ciencias exactas y naturales Universidad<br>nacional de Cuyo<br>Argentina           | Ledegen, Hannes<br>Conservation biologist<br>Natuurpunt Studie VZW<br>Belgium                                                      | Leder, Stephanie<br>Post-doc<br>Swedish University of Agricultural Sciences (SLU)<br>Germany                                                         |
| Ledesma, José<br>Postdoctoral Researcher<br>Swedish University of Agricultural Sciences<br>Sweden                           | LEDESMA-VÁZQUEZ, JORGE<br>EMERITUS PROFESSOR<br>UABC<br>Mexico                                                                     | Ledoux, Jean-Baptiste<br>Postdoctoral researcher<br>Institute of Marine Science (ICM-CSIC)<br>Spain                                                  |

|                                                                                                                                    |                                                                                                                                |                                                                                                                                  |
|------------------------------------------------------------------------------------------------------------------------------------|--------------------------------------------------------------------------------------------------------------------------------|----------------------------------------------------------------------------------------------------------------------------------|
| Leduc, Antoine<br>Biologist<br>Universidade Federal da Bahia<br>Brazil                                                             | Leduc, Daniel<br>Environmental scientist<br>New Zealand                                                                        | Leduc, Guillaume<br>CEREGE, CNRS<br>France                                                                                       |
| Lee, Adrian<br>Retired Professor of Medical Microbiology<br>University of New South Wales<br>Australia                             | Lee, Carol Eunmi<br>Professor, Evolutionary Genetics<br>University of Wisconsin, Madison<br>United States of America (the)     | Lee, Charles<br>Senior Lecturer<br>University of Waikato<br>New Zealand                                                          |
| Lee, Christina<br>United States of America (the)                                                                                   | Lee, David G.<br>Ecologist/Protected Areas Specialist<br>Jamaica                                                               | Lee, Don *<br>Professor Emeritus<br>Seoul National University<br>Korea (the Republic of)                                         |
| Lee, Jasmine<br>PhD Candidate<br>University of Queensland<br>Australia                                                             | Lee, Jessica<br>Chemist, PhD<br>University of California, Berkeley<br>Hong Kong                                                | Lee, Jie-Yinn<br>M.Sc student, Biodiversity & Bio-systematic /<br>Environmental Science<br>Universiti Malaysia Sabah<br>Malaysia |
| Lee, Justin<br>Research Scientist/ Plant Science<br>Leibniz Inst of Plant Biochemistry<br>Germany                                  | Lee, Kyle<br>Meteorology<br>MetService New Zealand<br>New Zealand                                                              | LEE, Ling-Ling<br>Professor<br>National Taiwan University<br>Taiwan                                                              |
| Lee, Phyllis<br>Professor of Psychology<br>University of Stirling<br>United Kingdom of Great Britain and Northern Ireland<br>(the) | Lee, Seung-Il<br>PhD, Forest Ecologist<br>Canada                                                                               | Lee, Soon-Gu *<br>Professor<br>Dep't of Plant Medicals<br>Korea (the Republic of)                                                |
| Lee, Yohan<br>Assistant Professor<br>Yeungnam University<br>Korea (the Republic of)                                                | LEE, ZAN HUI *<br>BSC ENVIRONMENTAL SCIENCE (HONS)<br>THE UNIVERSITY OF NOTTINGHAM MALAYSIA CAMPUS<br>Malaysia                 | Leeds, Austin<br>PhD Candidate<br>Case Western Reserve University<br>United States of America (the)                              |
| Lee-Mäder, Eric<br>The Xerces Society<br>United States of America (the)                                                            | Leemans, Rik *<br>Professor in environmental Systems Analysis<br>Wageningen University<br>Netherlands (the)                    | Leeming, Samuel<br>MSc student<br>LMU - Munich<br>Germany                                                                        |
| Leen, Labeeuw<br>Research Associate<br>University Technology Sydney<br>Australia                                                   | Leenders, Twan<br>Conservation Biologist<br>Roger Tory Peterson Institute of Natural History<br>United States of America (the) | Leeney, Ruth<br>Post-doctoral research fellow<br>Simon Fraser University<br>Canada                                               |

|                                                                                                                                                                    |                                                                                                                             |                                                                                                                                            |
|--------------------------------------------------------------------------------------------------------------------------------------------------------------------|-----------------------------------------------------------------------------------------------------------------------------|--------------------------------------------------------------------------------------------------------------------------------------------|
| Lee-Yaw, Julie<br>Post-Doctoral fellow<br>University of British Columbia<br>Canada                                                                                 | Lefebvre, Marlène<br>INRA, Centre Val de Loire<br>France                                                                    | Lefebvre, Sébastien<br>Associate Professor in vétérinaire clinical nutrition<br>VetAgro Sup<br>France                                      |
| Lefebvre, Sébastien<br>Associate professor in veterinary clinical nutrition<br>VetAgro- Sup<br>France                                                              | LEFEVRE, EMILIE<br>Microbial Ecologist<br>Duke University<br>United States of America (the)                                 | legendre, stephane<br>research engineer<br>ecole normale superieure<br>France                                                              |
| Leger, Adrien<br>Postdoctoral fellow in Bioinformatics<br>EMBL-EBI<br>United Kingdom of Great Britain and Northern Ireland<br>(the)                                | Leger, Elizabeth<br>Associate Professor<br>University of Nevada, Reno<br>United States of America (the)                     | Legge, Sarah<br>Ass Prof<br>The Australian National University<br>Australia                                                                |
| Legler, Daniel<br>Professor, Faculty of Biology<br>University of Konstanz<br>Switzerland                                                                           | Legrand, Marine<br>post doc fellow, environmental anthropology<br>INRA/LISIS<br>France                                      | Legros, Mathieu<br>Postdoctoral Researcher<br>ETH Zurich<br>Switzerland                                                                    |
| Lehikoinen, Aleksi<br>Academy Research Fellow<br>University of Helsinki<br>Finland                                                                                 | Lehikoinen, Annukka<br>PhD, Aquatic sciences<br>University of Helsinki<br>Finland                                           | Lehikoinen, Petteri<br>Visiting researcher<br>Lund University<br>Sweden                                                                    |
| Lehman, Scott<br>Senior Research Scientist, Geochemistry and Climate<br>University of Colorado<br>United States of America (the)                                   | Lehmann Albornoz, Pablo *<br>Professor<br>Universidade do vale do rio dos Sinos (UNISINOS)<br>Brazil                        | Leidenberger, Sonja<br>Scientist/ Biology<br>Swedish Museum of Natural History<br>Sweden                                                   |
| LEIGH, KATHARINE<br>Biologist<br>United States of America (the)                                                                                                    | Leigh, Mary Beth<br>Associate Professor of Microbiology<br>University of Alaska Fairbanks<br>United States of America (the) | Leigh, Samantha<br>PhD Candidate of Ecology and Evolutionary Biology<br>University of California, Irvine<br>United States of America (the) |
| Leinfelder, Reinhold<br>Univ. Professor, Geology, Geobiology, Anthropocene<br>Research<br>Institute of Geological Sciences, Freie Universität Berlin<br>Germany    | Leis, Jeffrey<br>Adjunct Professor<br>Institute for Marine and Antarctic Studies, University of<br>Tasmania<br>Australia    | Leist, Marcel<br>Professor of Biology<br>University of Konstanz<br>Germany                                                                 |
| Leitão, Pedro J.<br>Post-doctoral Researcher<br>Technische Universitaet Braunschweig, Department<br>Landscape Ecology and Environmental System Analysis<br>Germany | Leite, Luciana<br>M.Sc., Ph.D. candidate<br>Oregon State University<br>Brazil                                               | LEITE, NEI<br>PROFESSOR<br>UFSC<br>Brazil                                                                                                  |



|                                                                                                             |                                                                                                                                                 |                                                                                                |
|-------------------------------------------------------------------------------------------------------------|-------------------------------------------------------------------------------------------------------------------------------------------------|------------------------------------------------------------------------------------------------|
| Leite, Tatiana<br>Professor - Marine Ecology<br>Universidade Federal do Rio Grande do Norte<br>Brazil       | Leite, Yuri<br>Associate Professor<br>Universidade Federal do Espírito Santo<br>Brazil                                                          | Leite Pitman, Renata<br>Director<br>Center for Atlantic Forest Conservation<br>Brazil          |
| Leitman, Paula Moraes<br>Jardim Botânico do Rio de Janeiro<br>Brazil                                        | Lejeusne, Christophe<br>Associate Professor in marine ecology<br>University Pierre and Marie Curie - Station Biologique de<br>Roscoff<br>France | Lelis, Diego<br>Master Degree Student/Plant Biotechnology<br>UFRJ<br>Brazil                    |
| Lemaire, Patrick<br>Research group leader, marine embryologist<br>Université de Montpellier-CNRS<br>France  | Lemarchand, Frederick<br>Full Professor<br>University of Caen<br>France                                                                         | Lemay, Evelyne<br>Master's Student in Biology<br>University Laval<br>Canada                    |
| Lemberger, Karin<br>Zoo and Wildlife Pathologist<br>Faunapath<br>France                                     | Lembrechts, Jonas<br>PhD Student - Global Change Ecology<br>University of Antwerp<br>Belgium                                                    | LEMERCIER, Audrey<br>PhD in Mechanics<br>France                                                |
| Lemes, Maristerra<br>Permanent Researcher<br>National Institute for Amazonia Research (INPA)<br>Brazil      | Lemes, Priscila<br>Post doctoral fellow<br>Universidade Estadual Julio de Mesquita Filho, UNESP,<br>Rio Claro<br>Brazil                         | Lemes Landeiro, Victor<br>Professor / Ecology<br>Universidade Federal de Mato Grosso<br>Brazil |
| Lemieux, Joanne<br>Associate Professor<br>University of Alberta<br>Canada                                   | Lemmel, Hartmut<br>Physicist<br>Vienna University of Technology<br>Austria                                                                      | Lemos, Felipe<br>Entomologist<br>Brazil                                                        |
| Lemos da Silva, Alessandro<br>archivist<br>Brazil                                                           | Lempert, William<br>PhD Candidate<br>University of Colorado<br>United States of America (the)                                                   | Lenancker, Pauline<br>PhD student in Ecology<br>James Cook University, Cairns<br>Australia     |
| Lenfers, Ulfia Annette *<br>Junior scientist<br>Hamburg University of Applied Sciences<br>Germany           | Lenoir, Jonathan<br>Associate Professor in Ecology and Biostatistics<br>Université de Picardie Jules Verne<br>France                            | Lenormand, Thomas<br>Research Director<br>CNRS<br>France                                       |
| Lens, Frederic<br>Assistant professor / wood sciences<br>Naturalis Biodiversity Center<br>Netherlands (the) | Lensink, Marc F.<br>Group leader, Computational Biology<br>CNRS<br>France                                                                       | Lentendu, Guillaume<br>PostDoc in Ecology<br>University of Kaiserslautern<br>Germany           |

|                                                                                                                                                                                      |                                                                                                                                                   |                                                                                                                                               |
|--------------------------------------------------------------------------------------------------------------------------------------------------------------------------------------|---------------------------------------------------------------------------------------------------------------------------------------------------|-----------------------------------------------------------------------------------------------------------------------------------------------|
| <p>Lenz, Dorina<br/>Bioinformatician<br/>Leibniz Institute for Zoo and Wildlife Research (IZW) in<br/>the Forschungsverbund Berlin e.V.<br/>Germany</p>                              | <p>Lenzen, Manfred<br/>Professor of Sustainability Research<br/>The University of Sydney<br/>Australia</p>                                        | <p>Lenzner, Bernd<br/>Research Assistant (PhD student)<br/>University of Vienna<br/>Austria</p>                                               |
| <p>Leon, Ariel<br/>Disease Ecologist<br/>Virginia Tech<br/>United States of America (the)</p>                                                                                        | <p>Leon, Blanca<br/>Research associate<br/>Museo de Historia Natural-UNMSM<br/>Peru</p>                                                           | <p>León, María<br/>research associate<br/>CINVESTAV<br/>Mexico</p>                                                                            |
| <p>Leon-Alvarado, Omar Daniel<br/>Biologist<br/>Universidad Industrial de Santander<br/>Colombia</p>                                                                                 | <p>Leonard, Jennifer<br/>permanent researcher<br/>Estación Biológica de Doñana, Consejo Superior de<br/>Investigaciones Científicas<br/>Spain</p> | <p>Leonard, Kaeden<br/>Postdoctoral fellow<br/>University of Waikato<br/>New Zealand</p>                                                      |
| <p>Leonardi, Jacques<br/>Senior Researcher<br/>University of Westminster, Dept for Planning and<br/>Transport<br/>United Kingdom of Great Britain and Northern Ireland<br/>(the)</p> | <p>Leonardo, Bereczky<br/>Wildlife biologist<br/>Association For Conserving Natural Values<br/>Romania</p>                                        | <p>Leonelli, Sabina<br/>Philosophy of Science<br/>University of Exeter<br/>United Kingdom of Great Britain and Northern Ireland<br/>(the)</p> |
| <p>leoni, federico<br/>Ph.d agrobiodiversity<br/>Scuola Superiore Sant'Anna<br/>Italy</p>                                                                                            | <p>Leon-Montiel, Roberto de J.<br/>Assistant Professor<br/>UNAM<br/>Mexico</p>                                                                    | <p>Lepais, Olivier<br/>Research Scientist<br/>INRA<br/>France</p>                                                                             |
| <p>Lepe, Manuel<br/>Student PhD. Conservation Medicine<br/>Universidad Andrés Bello<br/>Chile</p>                                                                                    | <p>Lepennetier, Gildas<br/>Researcher<br/>Klinikum rechts der Isar<br/>Germany</p>                                                                | <p>Lepofsky, Dana<br/>Professor of Archaeology<br/>Simon Fraser University<br/>Canada</p>                                                     |
| <p>Leponce, Maurice<br/>Tropical ecologist<br/>Royal Belgian Institute of Natural Sciences<br/>Belgium</p>                                                                           | <p>Lerdau, Manuel<br/>Professor of Environmental Sciences and of Biology<br/>University of Virginia<br/>United States of America (the)</p>        | <p>Leroy, Boris<br/>Lecturer<br/>Muséum National d'Histoire Naturelle<br/>France</p>                                                          |
| <p>Leroy, Celine<br/>Researcher in tropical ecology<br/>IRD - French Institute for Research on Sustainable<br/>Development<br/>France</p>                                            | <p>Lertzman, Ken<br/>Professor of Forest Ecology and Management<br/>Simon Fraser University<br/>Canada</p>                                        | <p>Les, Donald<br/>Professor<br/>University of Connecticut<br/>United States of America (the)</p>                                             |
| <p>Lescak, Emily<br/>United States of America (the)</p>                                                                                                                              | <p>Lescinsky, Halard<br/>Professor Coral Reef Ecology and Paleontology<br/>Otterbein University<br/>United States of America (the)</p>            | <p>Lescroëil, Amélie<br/>Seabird ecologist<br/>France</p>                                                                                     |

|                                                                                                                                                                               |                                                                                                                                                   |                                                                                                                                |
|-------------------------------------------------------------------------------------------------------------------------------------------------------------------------------|---------------------------------------------------------------------------------------------------------------------------------------------------|--------------------------------------------------------------------------------------------------------------------------------|
| Lessard, Bryan<br>Entomologist<br>CSIRO<br>Australia                                                                                                                          | Lessmann, Janeth<br>PhD Candidate in Ecology<br>Pontificia Universidad Católica de Chile<br>Chile                                                 | Lestak, Leanne<br>Associate Scientist II/GIS Specialist<br>University of Colorado at Boulder<br>United States of America (the) |
| Lester, Philip<br>Professor<br>Victoria University of Wellington<br>New Zealand                                                                                               | Lester, Rebecca<br>Associate Professor, Freshwater Biology<br>Deakin University<br>Australia                                                      | Letnic, Mike<br>Associate Professor Ecology<br>University of New South Wales<br>Australia                                      |
| Letourneur, Yves<br>Professor, Ecology<br>Université de la Nouvelle-Calédonie<br>New Caledonia                                                                                | Leuker, Christina<br>PhD Student<br>Max Planck Institute for Human Development<br>Germany                                                         | Leusch, Frederic<br>Associate Professor<br>Griffith University<br>Australia                                                    |
| Levacov, Diana<br>Biologist<br>Instituto Estadual do Ambiente - Inea/RJ<br>Brazil                                                                                             | Leven, Catriona<br>Research Technician, Ecology<br>University of Alberta<br>Canada                                                                | LEVEQUE, Maude<br>Postdoc Parasitology<br>CHU Montpellier - UMR MiVEGEC<br>France                                              |
| Leverkus, Alexandro B<br>Researcher/ Ecology<br>Universidad de Alcalá<br>Spain                                                                                                | Levers, Christian<br>Postdoctoral researcher<br>Germany                                                                                           | Levesley, Aurora<br>United Kingdom of Great Britain and Northern Ireland<br>(the)                                              |
| Levi, Taal<br>Assistant Professor<br>Oregon State University<br>United States of America (the)                                                                                | Levin, Noam<br>Associate Professor of Geography<br>The Hebrew University of Jerusalem<br>Israel                                                   | Levin, Simon<br>Professor, Ecology and Evolutionary Biology<br>Princeton University<br>United States of America (the)          |
| Levine, Alexis<br>Landscape Architect<br>BS Ecology UMich MLA Illinois Institute of Tech<br>United States of America (the)                                                    | Levis, Carolina<br>PhD in Ecology<br>Brazilian National Institute for Amazonian Research and<br>Wageningen University & Research<br>Brazil        | Levitt Barmats, Ya'arit<br>PhD student<br>Tel Aviv University<br>Israel                                                        |
| Level, Harold<br>Professor<br>CRED-AgroParisTech<br>France                                                                                                                    | Levy, Karen<br>Associate Professor of Environmental Health<br>Rollins School of Public Health, Emory University<br>United States of America (the) | Levy, Laura<br>Geology<br>United States of America (the)                                                                       |
| lewallen, ann-elise<br>Associate Professor of Modern Japanese Cultural Studies<br>& Anthropology<br>University of California, Santa Barbara<br>United States of America (the) | Lewandowski, Jörg<br>Scientist / Ecohydrology<br>Leibniz-Institute of Freshwater Ecology and Inland<br>Fisheries Berlin<br>Germany                | Lewandowski, Wolfgang<br>Research Scientist (seed/ plant ecophysiology)<br>The University of Western Australia<br>Australia    |

|                                                                                                                 |                                                                                                                                        |                                                                                                                               |
|-----------------------------------------------------------------------------------------------------------------|----------------------------------------------------------------------------------------------------------------------------------------|-------------------------------------------------------------------------------------------------------------------------------|
| Lewis, Alan<br>Emeritus Professor<br>Earth, Oceans & Atmospheric Sciences - Univ. of British Columbia<br>Canada | Lewis, Ceri<br>Senior lecturer in marine biology<br>University of Exeter<br>United Kingdom of Great Britain and Northern Ireland (the) | Lewis, Deborah<br>Curator, Plant Sciences<br>Iowa State University<br>United States of America (the)                          |
| Lewis, FJ Adam<br>Biologist<br>Ecofish Research Ltd.<br>Canada                                                  | Lewis, Joe *<br>Head of Chemical Biology Core Facility<br>EMBL<br>Germany                                                              | Lewis, Ladonna<br>Psychology Professor<br>Glendale Community College, AZ<br>United States of America (the)                    |
| Lewis, Melissa<br>Wildlife Conservation Law Specialist<br>South Africa                                          | Lewis, Paige<br>University of Victoria<br>Canada                                                                                       | Lewis, Patrick<br>Botany<br>U.W.I. Herbarium, Mona.<br>Jamaica                                                                |
| Lewis, Susan<br>Professor of Biology<br>Carroll University<br>United States of America (the)                    | Lewis, Thomas<br>Program Manager<br>The Ara Project<br>United Kingdom of Great Britain and Northern Ireland (the)                      | Leynen, Nathalie<br>University of Hasselt<br>Belgium                                                                          |
| Leyten, Harrie<br>Ph.D.<br>Retired<br>Netherlands (the)                                                         | L'Hévéder, Blandine<br>Oceanography<br>LOCEAN-IPSL, UPMC<br>France                                                                     | Li, Blaise<br>Research engineer in bioinformatics on a temporary contract<br>Institut Pasteur<br>France                       |
| Li, Chunhui<br>Geochemistry<br>USTC<br>China                                                                    | Li, Fuyan<br>postdoc<br>University of Hawaii<br>United States of America (the)                                                         | Li, Guo<br>Ph.D candidate<br>Max Planck Institute for Chemistry<br>Germany                                                    |
| Li, Larry<br>Professor of Ecology<br>University of California at Riverside<br>United States of America (the)    | Li, Shanghua<br>Ph.D. Student<br>University of Tübingen<br>China                                                                       | LI, SONGHAI<br>Professor/Marine mammal research<br>China                                                                      |
| Li, Wen-Hsiung<br>Distinguished Research Fellow, Biodiversity Research Center<br>Academia Sinica<br>Taiwan      | Li, Xuankun<br>PhD student<br>Australian National Insect Collection, CSIRO<br>Australia                                                | Li, Yuanheng<br>theoretical ecology<br>German Centre for Integrative Biodiversity Research (iDiv) Halle-Jena-Leipzig<br>China |
| Li, Yueh-Fen<br>Research Scientist<br>The Ohio State University<br>United States of America (the)               | Li, Zhongqiu<br>Associate Professor of Zoology<br>Nanjing University<br>China                                                          | Liang, Boyi<br>Peking University<br>China                                                                                     |

|                                                                                                                                                     |                                                                                                                                       |                                                                                                                                                           |
|-----------------------------------------------------------------------------------------------------------------------------------------------------|---------------------------------------------------------------------------------------------------------------------------------------|-----------------------------------------------------------------------------------------------------------------------------------------------------------|
| <p>Liataud, Kevin<br/>PhD student<br/>CNRS<br/>France</p>                                                                                           | <p>LIBOIS, Roland<br/>Prof. Zoology<br/>Université de LIEGE<br/>Belgium</p>                                                           | <p>Licuanan, Wilfredo<br/>Professor, Ecology and Marine Biology<br/>De La Salle University<br/>Philippines (the)</p>                                      |
| <p>Lidicker, William Z.<br/>Professor of Integrative Biology Emeritus<br/>University of California, Berkeley<br/>United States of America (the)</p> | <p>Lieberman, Susan<br/>Vice President, International Policy<br/>Wildlife Conservation Society<br/>United States of America (the)</p> | <p>Liebhold, Andrew<br/>Adjunct Professor<br/>West Virginia University<br/>United States of America (the)</p>                                             |
| <p>Liede-Schumann, Sigrid<br/>Full Professor, Botany<br/>University of Bayreuth<br/>Germany</p>                                                     | <p>Liefting, Yorick<br/>Research Technician<br/>Wageningen University<br/>Netherlands (the)</p>                                       | <p>Lieke, Thora<br/>Leibnitz Institute of Freshwater Ecology and Inland<br/>Fisheries<br/>Germany</p>                                                     |
| <p>Lienert, Judit<br/>Cluster Leader Decision Analysis<br/>Eawag: Swiss Federal Institute of Aquatic Science and<br/>Technology<br/>Switzerland</p> | <p>Lier, Ciarán<br/>MSc A. I. / Civil movement<br/>Netherlands (the)</p>                                                              | <p>Liess, Antonia<br/>Associate Professor in Environmental Science<br/>Department of Environmental and Bioscience, Halmstad<br/>University<br/>Sweden</p> |
| <p>Lietz, Robin<br/>Master Student in Ecology, Evolution and Conservation<br/>University of Potsdam<br/>Germany</p>                                 | <p>Lievens, Eewoud<br/>PhD Researcher in Agricultural Economics<br/>University of Leuven<br/>Belgium</p>                              | <p>Lightfoot, Sophie<br/>Biologist<br/>University of Oxford<br/>United Kingdom of Great Britain and Northern Ireland<br/>(the)</p>                        |
| <p>Ligmann-Zielinska, Arika<br/>Associate Professor Geography<br/>Michigan State University<br/>United States of America (the)</p>                  | <p>Lihl, Christina<br/>PhD Student<br/>Germany</p>                                                                                    | <p>Lihoreau, Mathieu<br/>CNRS<br/>France</p>                                                                                                              |
| <p>Likens, Gene E.<br/>Founding Director and President Emeritus<br/>Cary Institute of Ecosystem Studies<br/>United States of America (the)</p>      | <p>Liles, Michael<br/>Conservation Scientist<br/>Asociación ProCosta<br/>El Salvador</p>                                              | <p>Lilley, Bianca<br/>New Zealand</p>                                                                                                                     |
| <p>Lilley, Brenna<br/>Medical Student<br/>Perelman School of Medicine at the University of<br/>Pennsylvania<br/>United States of America (the)</p>  | <p>Lim, Boon Han *<br/>Engineering (Solar energy)<br/>Universiti Tunku Abdul Rahman<br/>Malaysia</p>                                  | <p>Lim, Norman<br/>Lecturer / Ecologist<br/>Nanyang Technological University<br/>Singapore</p>                                                            |
| <p>Lim, Voon Ching<br/>Malaysia</p>                                                                                                                 | <p>Lima, Albertina<br/>Biologist<br/>INPA<br/>Brazil</p>                                                                              | <p>Lima, Daniela Oliveira<br/>Lecture - ecology<br/>Universidade Federal da Fronteira Sul<br/>Brazil</p>                                                  |

|                                                                                                                                   |                                                                                                                      |                                                                                                                                                  |
|-----------------------------------------------------------------------------------------------------------------------------------|----------------------------------------------------------------------------------------------------------------------|--------------------------------------------------------------------------------------------------------------------------------------------------|
| Lima, Fernando<br>Researcher<br>CIBIO/InBIO University of Porto<br>Portugal                                                       | Lima, Joni Esrom<br>Associate professor<br>Universidade Federal de Minas Gerais<br>Brazil                            | Lima, Lucas *<br>Biólogo<br>Universidade Paulista<br>Brazil                                                                                      |
| Lima, Luciano<br>Ornithologist<br>Instituto Butantan<br>Brazil                                                                    | Lima, Marcos<br>Assistant Professor<br>Physics Institute, University of Sao Paulo<br>Brazil                          | Lima, Marina *<br>Oceanographer<br>Universidade Federal do Espírito Santo<br>Brazil                                                              |
| Lima, Mauricio<br>Full professor/Population Dynamics<br>Pontificia Universidad Católica de Chile<br>Chile                         | Lima, Sergio<br>Zoology Professor<br>Universidade Federal do Rio Grande do Norte<br>Brazil                           | Lima da Silva, Gustavo Henrique<br>Botany<br>Brazil                                                                                              |
| Lima jr., Francisco<br>PhD student<br>Federal University of Pernambuc<br>Brazil                                                   | Lima-Junior, Dilermando *<br>Professor - Evolution, Ecology<br>Federal University of Mato Grosso<br>Brazil           | Lima-Rezende, Cássia A.<br>Postdoctoral researcher<br>Universidade de Brasília<br>Brazil                                                         |
| Limpens, Juul<br>Associate professor<br>Wageningen University<br>Netherlands (the)                                                | Lin, Huimin<br>Ecology<br>China                                                                                      | Linares, Omar J.<br>Head Laboratory of Paleobiology<br>Universidad Simón Bolívar, Dpt Estudios Ambientales<br>Venezuela (Bolivarian Republic of) |
| Lincoln, Noa<br>Professor<br>University of Hawai'i at Mānoa<br>United States of America (the)                                     | Lind, Johan<br>Associate professor<br>Stockholm University<br>Sweden                                                 | Lind, Lovisa<br>Postdoctor in Ecology<br>Umeå University<br>Sweden                                                                               |
| Lind, Ole Christian<br>Associate professor<br>Norwegian University of Life Sciences<br>Norway                                     | Lindgaard, Claus<br>Freshwater Biologist<br>Freshwater Biological Laboratory, University of<br>Copenhagen<br>Denmark | Lindgart, Mats<br>Professor<br>Department of Marine Sciences<br>Sweden                                                                           |
| Lindeman, Ken<br>Professor, Sustainability<br>Lindeman<br>United States of America (the)                                          | Lindeman, Peter<br>Professor of Biology<br>Edinboro University of Pennsylvania<br>United States of America (the)     | Lindén, Andreas<br>Senior Researcher, Ecology<br>Novia University of Applied Sciences<br>Finland                                                 |
| Lindenfors, Patrik<br>Associate Professor of Zoological Ecology at the<br>Department of Zoology<br>Stockholm University<br>Sweden | Linder, Christian<br>Field Entomologist<br>Agroscope<br>Switzerland                                                  | Linder, Hans Peter<br>Professor of Systematic Botany<br>University of Zurich<br>Switzerland                                                      |

|                                                                                                                                     |                                                                                                                        |                                                                                                                                                         |
|-------------------------------------------------------------------------------------------------------------------------------------|------------------------------------------------------------------------------------------------------------------------|---------------------------------------------------------------------------------------------------------------------------------------------------------|
| Lindestad, Olle<br>PhD student, animal ecology<br>Department of Zoology, Stockholm University<br>Sweden                             | Lindhe, Ulla<br>Professor emerita<br>Zoology<br>Sweden                                                                 | Lindquist Karlsson, Albert<br>pedagogics<br>Göteborgs universitet<br>Sweden                                                                             |
| Lindroth, Richard<br>Vilas Distinguished Achievement Professor<br>University of Wisconsin-Madison<br>United States of America (the) | Lindsay, Dhugal<br>Deep Sea Biologist<br>JAMSTEC<br>Japan                                                              | Lindsell, Jeremy<br>Conservation Scientist<br>A Rocha International<br>United Kingdom of Great Britain and Northern Ireland<br>(the)                    |
| Lindsey, Emily<br>Curator<br>La Brea Tar Pits & Museum<br>United States of America (the)                                            | Lindsey, PhD, Kieran<br>Wildlife Biologist<br>Virginia Tech<br>United States of America (the)                          | Lindström, Eva<br>Professor<br>Uppsala University<br>Sweden                                                                                             |
| Line, Rochefort<br>University Professor<br>University Laval<br>Canada                                                               | Linford, Samantha<br>Graduate Student Anthropology<br>University of Colorado Boulder<br>United States of America (the) | Linhares Dantas, Maria Luiza<br>PhD Candidate<br>Instituto de Astronomia, Geofísica e Ciências<br>Atmosféricas - Universidade de São Paulo<br>Brazil    |
| Linhoff, Luke<br>PhD Candidate, Conservation Biology<br>Florida International University<br>United States of America (the)          | Link, Andres<br>Biologist<br>Universidad de Los Andes<br>Colombia                                                      | Link, Arthur<br>Researcher<br>NA<br>United States of America (the)                                                                                      |
| Link, Roman Mathias<br>PhD Student, Ecology<br>Georg-August-University Göttingen<br>Germany                                         | Linke, Simon<br>Senior Research Fellow<br>Griffith University<br>Australia                                             | Linkie, Matthew<br>Terrestrial Program Director<br>Wildlife Conservation Society<br>Indonesia                                                           |
| Linnanen, Lassi<br>Professor, Environmental Economics and Management<br>Lappeenranta University of Technology<br>Finland            | Lino, Eric<br>Volunteer GIS analyst<br>International Institute for Sustainability<br>Brazil                            | Lintermans, Mark<br>Associate Professor of freshwater fish management and<br>ecology<br>University of Canberra<br>Australia                             |
| Liow, Lee Hsiang<br>Associate Professor<br>University of Oslo<br>Norway                                                             | Liparini, Alexandre<br>Teacher/ Paleontology; Evolution<br>Universidade Federal de Sergipe<br>Brazil                   | Lipcius, Romuald<br>Professor of Marine Science<br>Virginia Institute of Marine Science, College of William &<br>Mary<br>United States of America (the) |

|                                                                                                                                                                                   |                                                                                                                                                                                                   |                                                                                                                                                  |
|-----------------------------------------------------------------------------------------------------------------------------------------------------------------------------------|---------------------------------------------------------------------------------------------------------------------------------------------------------------------------------------------------|--------------------------------------------------------------------------------------------------------------------------------------------------|
| Lipeh, Shahlinney<br>PhD Candidate (Wood Science) & Research entomologist<br>Oregon State University & Forest Research Institute of<br>Malaysia<br>United States of America (the) | Liporoni, Rodolfo<br>Ecology<br>University of São Paulo<br>Brazil                                                                                                                                 | Lipoti, Jill<br>Assistant Teaching Professor, Human Ecology<br>Rutgers University<br>United States of America (the)                              |
| Lipps, Jere<br>Professor Emeritus, Integrative Biology<br>University of California, Berkeley<br>United States of America (the)                                                    | Lipshutz, Sara<br>PhD Student<br>University of Tennessee<br>United States of America (the)                                                                                                        | Liquete, Camino<br>Belgium                                                                                                                       |
| Lira Martins, Demetrius<br>PhD Student<br>Imperial College London<br>United Kingdom of Great Britain and Northern Ireland<br>(the)                                                | Lira-Cuadra, Francisco<br>Biologist, MSc Environmental Planning and Management<br>Chile                                                                                                           | Lis, Hagar<br>Oceanography<br>Hebrew University of Jerusalem<br>Israel                                                                           |
| Lisboa, Décio<br>Biologist<br>Uesc<br>Brazil                                                                                                                                      | Lisboa, Gabriella<br>Estudante de Farmácia<br>Unifesp<br>Brazil                                                                                                                                   | Lisnizer, Nora<br>Researcher/Seabird ecology<br>CESIMAR (Conicet, National Council for Scientific<br>Research)<br>Argentina                      |
| Lister, Adrian<br>Research Leader in Palaeontology<br>Natural History Museum<br>United Kingdom of Great Britain and Northern Ireland<br>(the)                                     | Lister, Andrew<br>Ecology<br>United States of America (the)                                                                                                                                       | Liston, Aaron<br>Professor<br>Oregon State University<br>United States of America (the)                                                          |
| Litchfield, Carla<br>Senior Lecturer, School of Psychology, Social Work &<br>Social Policy<br>University of South Australia<br>Australia                                          | Litschel, Johannes<br>Research fellow<br>Collaborative Research Center 1015 Muße (Otiose<br>Leisure): Borders, Temporal and Spatial Character,<br>Practices' at University of Freiburg<br>Germany | Little, Charles<br>retired<br>New Zealand                                                                                                        |
| Little, Chelsea J.<br>PhD candidate, Ecology<br>University of Zurich<br>Switzerland                                                                                               | Little, Mary<br>Professor-Sustainable Development<br>School for Field Studies<br>Costa Rica                                                                                                       | Little, Rob<br>Manager; DST-NRF Centre of Excellence<br>FitzPatrick Institute of African Ornithology, University of<br>Cape Town<br>South Africa |
| Litwinski, Anthony<br>Business educator (retired)<br>Litwinski<br>United States of America (the)                                                                                  | Litza, Kathrin<br>PhD student in Ecology<br>University of Bremen<br>Germany                                                                                                                       | Liu, Leonard<br>Biologist<br>United States of America (the)                                                                                      |



|                                                                                                                                                                                                |                                                                                                                           |                                                                                                                       |
|------------------------------------------------------------------------------------------------------------------------------------------------------------------------------------------------|---------------------------------------------------------------------------------------------------------------------------|-----------------------------------------------------------------------------------------------------------------------|
| Liu, Mingxin<br>PhD student / Forest ecology<br>University of Tasmania<br>Australia                                                                                                            | Livak, Ferenc<br>Immunology<br>National Institute of Health<br>United States of America (the)                             | Livramento Mendes, Renata<br>MBA Coordinator-Positive Psychology<br>Centro Universitário UNA e IPOG<br>Brazil         |
| Lizana, Miguel<br>Univ. Lecturer in Zoology, animal conservation and<br>herpetology<br>Universidad de Salamanca<br>Spain                                                                       | LIZARRAGA, MARIA CAMINO<br>JEFA CONTROL CALIDAD ABASTECIMIENTO<br>SERVICIOS DE LA COMARCA DE PAMPLONA SA<br>Spain         | Lizcano Sandoval, Luis David<br>Biologist<br>Universidad del Valle<br>Colombia                                        |
| Ljung, Karl<br>Lecturer, Geology<br>Department of Geology, Lund University<br>Sweden                                                                                                           | Llebot, Josep Enric<br>Full professor in Condensed Matter Physics<br>Autonomous University of Barcelona<br>Spain          | Llerena, Carlos A.<br>Forestry<br>Universidad Nacional Agraria La Molina<br>Peru                                      |
| Llirós, Marc<br>Postdoctoral Researcher<br>Universitat Autònoma de Barcelona; Universitat de Vic–<br>Universitat Central de Catalunya; Institut d'Investigació<br>Biomèdica de Girona<br>Spain | Lliso, Bosco<br>Junior Researcher and PhD Candidate<br>BC3 - Basque Center for Climate Change<br>Spain                    | Llorente, Miquel<br>Research Director, Primatologist<br>Institut de Recerca i Estudis en Primatologia, IPRIM<br>Spain |
| Llorente, Mireia *<br>Soil Scientist<br>Forest Research Centre of Catalonia<br>Spain                                                                                                           | Llovet, Juan<br>Associate Professor of Ecology<br>University of Alicante<br>Spain                                         | Lloyd, Alicia<br>Coral Reef Scientist<br>Australia                                                                    |
| Lloyd, Janice<br>Teacher/Researcher in Human/Animal Health, Behaviour,<br>Welfare & Ethics<br>Australia                                                                                        | Lloyd, Justin<br>Zoology<br>University of Johannesburg<br>South Africa                                                    | Lluís, Pesquer<br>CREAF<br>Spain                                                                                      |
| Loayza, Andrea<br>Associate Professor<br>Universidad de La Serena<br>Chile                                                                                                                     | Lobato-García, Juan Manuel<br>Academic<br>Instituto de Investigaciones en Ecosistemas y<br>Sustentabilidad UNAM<br>Mexico | LOBEJON, LUIS FERNANDO<br>LECTURER IN ECONOMICS<br>UNIVERSITY OF VALLADOLID<br>Spain                                  |
| Lobert, Bertram<br>Ecologist & community advocate<br>Australia                                                                                                                                 | Lobo, Guilherme<br>Master in Ecology<br>INPA<br>Brazil                                                                    | Lobo Fernandes, Teresa<br>Zoo Veterinarian<br>Lisbon Zoo<br>Portugal                                                  |
| Lobo-Hajdu, Gisele<br>Professor<br>State University Rio de Janeiro<br>Brazil                                                                                                                   | LOCKHART, Peter<br>Professor Evolutionary Genetics<br>Massey Unibversity<br>New Zealand                                   | Loconto, Allison<br>Researcher, Sociology<br>Institut National de la Recherche Agronomique (INRA)<br>France           |

|                                                                                                                       |                                                                                                                                                             |                                                                                                                                                   |
|-----------------------------------------------------------------------------------------------------------------------|-------------------------------------------------------------------------------------------------------------------------------------------------------------|---------------------------------------------------------------------------------------------------------------------------------------------------|
| Loeb, Marina<br>Zoology<br>Museu de Zoologia da Universidade de São Paulo (MZUSP)<br>Brazil                           | Loechel, Barton<br>Social Scientist<br>Australia                                                                                                            | Loeuille, Nicolas<br>Full Professor (Ecology)<br>University Pierre & Marie Curie (UPMC)<br>France                                                 |
| Loew, Christian<br>Group Leader?Structural Biology<br>EMBL Hamburg<br>Germany                                         | Löfroth, Therese<br>Associate professor in ecology<br>Wildlife, Fish and Environmental studies at the Swedish University of Agricultural Sciences<br>Sweden | Logan, Corina<br>Leverhulme Early Career Research Fellow<br>University of Cambridge<br>United Kingdom of Great Britain and Northern Ireland (the) |
| Lognoul, Margaux<br>Researcher in Environmental Physics<br>Gembloux Agro-Bio Tech, University of Liège<br>Belgium     | Logue, Jürg B.<br>Postdoctoral Researcher<br>Linneaus University<br>Sweden                                                                                  | Loguercio, Leandro L.<br>Associate Professor - Genetics<br>Dept Biological Sciences (DCB), State University of Santa Cruz (UESC)<br>Brazil        |
| Lohbeck, Madelon<br>scien<br>Wageningen University<br>Netherlands (the)                                               | Lohmann, Gerrit<br>Climate<br>AWI<br>Germany                                                                                                                | Lohmann, Lucia<br>Botany Professor<br>Universidade de Sao Paulo<br>Brazil                                                                         |
| Lõhmus, Asko<br>Chair of Natural Resources<br>Institute of Ecology and Earth Sciences, University of Tartu<br>Estonia | Lohtander-Buckbee, Katileena<br>Biologist<br>Finnish Environment Institute<br>Finland                                                                       | Loik, Michael<br>Professor of Environmental Studies<br>University of California, Santa Cruz<br>United States of America (the)                     |
| Loiseau, Claire<br>Auxiliary Researcher<br>CIBIO University of Porto<br>Portugal                                      | Lokonon, Boris<br>University of Parakou<br>Benin                                                                                                            | Lokuciejewski, Emma<br>MRes student<br>University of Exeter<br>United Kingdom of Great Britain and Northern Ireland (the)                         |
| Lombaert, Eric<br>Research engineer<br>INRA<br>France                                                                 | Lombard, Fabien<br>Associate professor, Marine Ecology<br>Sorbonne Universités, Université Pierre et Marie Curie (UPMC)<br>France                           | Lona-Durazo, Frida<br>PhD student<br>University of Toronto<br>Canada                                                                              |
| Londono-Burbano, Alejandro<br>PhD student<br>PUCRS<br>Brazil                                                          | Londoño-Cruz, Edgardo<br>Marine Biologist - Professor<br>Universidad del Valle<br>Colombia                                                                  | Londono-Murcia, Maria<br>Biodiversity Researcher<br>Alexander von Humboldt Institute<br>Colombia                                                  |

|                                                                                                                    |                                                                                                                                                           |                                                                                                                                      |
|--------------------------------------------------------------------------------------------------------------------|-----------------------------------------------------------------------------------------------------------------------------------------------------------|--------------------------------------------------------------------------------------------------------------------------------------|
| Lone, Imtiaz Nisar<br>Postdoctoral fellow, life science<br>EMBL, Heidelberg<br>Germany                             | Lone, Karen<br>Norway                                                                                                                                     | LONEUX, Michele<br>Wildlife Biologist<br>Belgium                                                                                     |
| Long, Barney<br>Director of Species Conservation<br>Global Wildlife Conservation<br>United States of America (the) | Long, Jo<br>Senior Conservation Policy Officer<br>Scottish Environment Protection Agency<br>United Kingdom of Great Britain and Northern Ireland<br>(the) | Long, John<br>Strategic Professor in Palaeontology<br>Flinders University<br>Australia                                               |
| Long, Roger<br>Biology/Ecology Professor<br>Long<br>United States of America (the)                                 | Longdoz, Bernard<br>Professor in Environmental Biophysic<br>Gembloux Agro-Bio Tech, Liège University<br>Belgium                                           | Longo, Caterina<br>Researcher<br>Biology Department-Bari University<br>Italy                                                         |
| Longobardi, Lorenzo<br>PhD in marine ecology<br>Stazione Zoologica Anton Dohrn<br>Italy                            | Looman, Arun<br>Environmental Science<br>Southern Cross University<br>Australia                                                                           | Looney, Brian<br>Mycologist<br>INRA-Nancy<br>France                                                                                  |
| Looney, Erin<br>PhD student<br>Massachusetts Institute of Technology<br>United States of America (the)             | Loope, David<br>Professor of Geology<br>University of Nebraska<br>United States of America (the)                                                          | Loope, Kevin<br>Postdoctoral Researcher<br>Dept of Entomology, University of California, Riverside<br>United States of America (the) |
| Looström, Jakob<br>Research assistant, marine biology<br>Sveriges lantbruks universitet<br>Sweden                  | Loots, Karl<br>Meteorologist<br>Meteorological service of New Zealand Ltd<br>New Zealand                                                                  | Lopera-Salazar, Andrea<br>Estudiante MSc<br>Universidad de Antioquia<br>Colombia                                                     |
| Lopes, Aline<br>Associate professor of Ecology and Limnology<br>Universidade Nilton Lins<br>Brazil                 | Lopes, Amauri<br>Retired<br>State University of Campinas<br>Brazil                                                                                        | Lopes, Célia<br>post doc fellow in Biological Anthropology<br>University of Évora / CIAS<br>Portugal                                 |
| Lopes, Daniel<br>Conservation Biology<br>Portugal                                                                  | Lopes, Francis<br>Graduando<br>Universidade do Estado de Mato Grosso<br>Brazil                                                                            | Lopes, Gerson<br>Research/Conservation<br>Institute of Sustainable Development Mamirauá<br>Brazil                                    |
| Lopes, Ileyne<br>Environmental education - Ecology<br>AQUASIS<br>Brazil                                            | Lopes, Norberto<br>Professor of Organic Chemistry<br>University of Sao Paulo<br>Brazil                                                                    | Lopes, Priscila<br>Human Ecology<br>Federal University of Rio Grande do Norte<br>Brazil                                              |

|                                                                                                                |                                                                                                                |                                                                                                                        |
|----------------------------------------------------------------------------------------------------------------|----------------------------------------------------------------------------------------------------------------|------------------------------------------------------------------------------------------------------------------------|
| Lopes, Rubens<br>Associate Professor, Biological Oceanography<br>Univesity of Sao Paulo<br>Brazil              | Lopes, Vanessa<br>Universidade Federal de Goiás<br>Brazil                                                      | Lopes-Assad, Maria-Leonor<br>Professor, Soil Science<br>Federal University of São Carlos<br>Brazil                     |
| Lopez, Clément<br>Research technician / PhD student<br>France                                                  | Lopez, Felix<br>Research<br>Instituto de Pesquisa Econômica Aplicada<br>Brazil                                 | Lopez, Luis<br>Mathematician<br>Universidad Nacional Autónoma de México<br>Mexico                                      |
| Lopez, Omar<br>Plant science<br>National Secretariat for Science Tecnology and<br>Innovation SENACYT<br>Panama | López, Cerén *<br>Curator Herbarium/Botany<br>Museo de Historia Natural de El Salvador<br>El Salvador          | López, Edgardo<br>Professor<br>UNAM<br>Mexico                                                                          |
| López, Jaime<br>PhD in Marine Sciences<br>Spain                                                                | López, Rafael<br>Associate Professor<br>Universidad Autónoma de Madrid<br>Spain                                | López, Rosana<br>Marie Curie postdoctoral fellow/Plant Ecophysiology<br>INRA<br>France                                 |
| López Bujanda, Oscar Enrique<br>Master Student, ornithology<br>Universidad de Sonora<br>Mexico                 | López Cabrera, Magali<br>Peru                                                                                  | López de la Fuente, Adolfo<br>Retired Professor; Engineering/Biology<br>Universidad Centroamericana (UCA)<br>Nicaragua |
| Lopez Delgado, Julia<br>MSc Evolutionary Biology student<br>Leiden University<br>Spain                         | Lopez Gonzalez, Carlos<br>Mexico                                                                               | LOPEZ MELIAN, FERNANDO<br>OCEANOGRAPHER AND MARINE BIOLOGIST<br>OCEAN NET<br>Spain                                     |
| López Núñez, Rafael *<br>Researcher/Agriculture<br>CSIC<br>Spain                                               | Lopez Zieher, Ximena<br>PhD student<br>IFEVA<br>Argentina                                                      | Lopez-Acosta, Maria<br>Spain                                                                                           |
| López-Ballesteros, Ana<br>Ecology postdoctoral researcher<br>University of Castilla La Mancha<br>Spain         | López-Bao, José Vicente<br>Research fellow<br>Oviedo University<br>Spain                                       | Lopez-Baucells, Adria<br>PhD Student<br>Granollers Museum of Natural Sciences<br>Spain                                 |
| López-Bueno, Alberto<br>Associated Professor<br>Universidad Autónoma de Madrid<br>Spain                        | López-Castañeda, Carolina<br>PHd in Biology Science<br>Independent consultor<br>Colombia                       | López-Corona, Oliver<br>Associate Researcher<br>C3-UNAM<br>Mexico                                                      |
| Lopez-Cubillos, Sofia<br>Conservation Researcher<br>The University of Queensland<br>Australia                  | López-Fernández, Hernán<br>Curator/Associate Professor<br>Royal Ontario Museum/University of Toronto<br>Canada | López-Gay, Rafael<br>Science Education<br>University of Almería (Spain)<br>Spain                                       |

|                                                                                                                                                                                                        |                                                                                                                                                                               |                                                                                                                               |
|--------------------------------------------------------------------------------------------------------------------------------------------------------------------------------------------------------|-------------------------------------------------------------------------------------------------------------------------------------------------------------------------------|-------------------------------------------------------------------------------------------------------------------------------|
| LÓPEZ-GUERRERO, JOSÉ ANTONIO<br>ASSOCIATE PROFESSOR MICROBIOLOGY<br>UNIVERSIDAD AUTÓNOMA DE MADRID<br>Spain                                                                                            | López-lopez, Wilson<br>Professor-psychology<br>Universidad Javeriana<br>Colombia                                                                                              | López-Márquez, Violeta<br>PhD Student<br>Museo Nacional de Ciencias Naturales (MNCN-CSIC)<br>Spain                            |
| López-Medellín, Xavier<br>Researcher, environmental conservation and<br>management<br>Centro de Investigación en Biodiversidad y Conservación,<br>Universidad Autónoma del Estado de Morelos<br>Mexico | López-Núñez, Francisco Alejandro<br>Spain                                                                                                                                     | López-Rayó, Sandra<br>Assitant Professor, PhD Agricultural Chemistry<br>University Autonoma of Madrid<br>Spain                |
| Lopez-Rodriguez, Maria Dolores<br>Postdoctoral researcher / Transdisciplinary research<br>University of Almeria<br>Spain                                                                               | López-Rodríguez, Manuel Jesús<br>Assisstant professor of Ecology<br>Universidad de Granada<br>Spain                                                                           | López-Sepulcre, Andrés<br>CNRS Researcher<br>Institute of Ecological and Environmental Sciences of<br>Paris (CNRS)<br>France  |
| López-Udias, Silvia<br>Associate Researcher (Botany)<br>Jardí Botànic de la Universitat de València<br>Spain                                                                                           | Lopez-Vaamonde, Carlos<br>Research Scientist<br>Institut National de la Recherche Agronomique (INRA) &<br>Institut de Recherche sur la Biologie de l'Insecte (IRBI)<br>France | López-Victoria, Mateo<br>Associate Professor<br>Pontificia Universidad Javeriana Cali<br>Colombia                             |
| Lopez-Villada, Jesus<br>Sustainable Energy<br>cr3Ea<br>Ecuador                                                                                                                                         | LOPEZ-WILCHIS, RICARDO<br>Researcher<br>UNIVERSIDAD AUTONOMA METROPOLITANA<br>Mexico                                                                                          | Lord, Joshua<br>Assistant Professor of Biology<br>Moravian College<br>United States of America (the)                          |
| Lorda, Julio<br>Professor<br>Universidad Autónoma de Baja California<br>Mexico                                                                                                                         | Lorel, Claire<br>PhD Student<br>MNHN<br>France                                                                                                                                | Lorenz, Aline<br>Professor<br>Federal University of Mato Grosso do Sul<br>Brazil                                              |
| Loretto, Matthias-Claudio<br>Postdoctoral Researcher<br>University of Vienna<br>Austria                                                                                                                | Lorimer, Craig<br>Professor Emeritus, Forest & Wildlife Ecology<br>University of Wisconsin-Madison<br>United States of America (the)                                          | Loroch, Vanya<br>Biology and Biotechnology Educator<br>Business School Lausanne<br>Switzerland                                |
| Lorrio Gonzalez, Silvia<br>Biomedical Researcher<br>Universidad Autonoma de Madrid<br>Spain                                                                                                            | Losada, Alberto<br>Full Professor - Retired Agricultural Irrigaton Hidrology @<br>Hydraulics<br>University Madrid<br>Spain                                                    | Losch, Martin<br>Research Scientist<br>Alfred Wegener Institute, Helmholtz Centre for Polar and<br>Marine Research<br>Germany |

|                                                                                                                                        |                                                                                                                                           |                                                                                                                                                 |
|----------------------------------------------------------------------------------------------------------------------------------------|-------------------------------------------------------------------------------------------------------------------------------------------|-------------------------------------------------------------------------------------------------------------------------------------------------|
| Losin, Neil<br>Biology<br>United States of America (the)                                                                               | Loss, Scott<br>Assistant Professor of Global Change Ecology and Management<br>Oklahoma State University<br>United States of America (the) | Loth, Alina<br>Biologist<br>University of St Andrews<br>United Kingdom of Great Britain and Northern Ireland (the)                              |
| Lotufo, Tito<br>Professor<br>Oceanographic Institute, University of Sao Paulo<br>Brazil                                                | LOUGBEGNON, Olou Toussaint<br>Associate Professor, Specialist in Ornithology<br>National Agriculture University of Benin<br>Benin         | Louise, SOUQUET<br>PhD student<br>Institut de Génomique Fonctionnelle de Lyon<br>France                                                         |
| Loureiro, João<br>Assistant Professor<br>Centre for Functional Ecology, Department of Life Sciences, University of Coimbra<br>Portugal | Loureiro, Marcelo<br>Assistant Professor in Vertebrate Zoology<br>Facultad de Ciencias<br>Uruguay                                         | Lourenço, André<br>PhD student (Biodiversity, Genetics and Evolution)<br>CIBIO-InBIO and Science Faculty of the University of Porto<br>Portugal |
| Lourenço, Carla<br>PhD candidate<br>Rhodes University<br>South Africa                                                                  | Lourenço, Pedro M.<br>Post-doc researcher in Animal Ecology<br>University of Lisboa<br>Portugal                                           | Lourenço, Rui<br>Postdoctoral researcher in Ecology and Conservation<br>University of Evora<br>Portugal                                         |
| Loustau, Denis<br>Senior scientist - Forest Biogeochemistry<br>INRA<br>France                                                          | Louw, Wanda<br>United Kingdom of Great Britain and Northern Ireland (the)                                                                 | Louwrens, Joan<br>Medical doctor<br>South Africa                                                                                                |
| Louyakis, Artemis<br>Postdoc<br>University of Connecticut<br>United States of America (the)                                            | Love, Martin.<br>Consultant Bat Ecologist<br>Halburn Consultants<br>United Kingdom of Great Britain and Northern Ireland (the)            | Lövei, Gabor L<br>Professor, Ecology<br>Aarhus University & Fujian Agricultural & Forestry University<br>Denmark                                |
| Loveless, Marilyn<br>Professor of Biology Emerita<br>The College of Wooster<br>United States of America (the)                          | lovell, chris<br>Ecologist<br>United Kingdom of Great Britain and Northern Ireland (the)                                                  | Lovo, Juliana<br>Pos-doc<br>University of Sao Paulo<br>Brazil                                                                                   |
| Low, Gabriel<br>Research Assistant, Avian Evolution Lab<br>National University of Singapore<br>Singapore                               | Low, Matthew<br>Associate Professor in Ecology<br>Swedish University of Agricultural Sciences<br>Sweden                                   | Löwenberg, Ulf<br>Fisheries Scientist<br>Freelancer<br>Germany                                                                                  |
| Löwenhardt, Hannah<br>Student of Forest and nature conservation<br>Wageningen university<br>Netherlands (the)                          | Lowman, Meg<br>Senior Scientist/Lindsay Chair in Botany<br>California Academy of Sciences<br>United States of America (the)               | Low-Pfeng, Antonio<br>Biólogo Marino, MSc.<br>Universidad de Los Lagos<br>Chile                                                                 |

|                                                                                                                               |                                                                                                                                                             |                                                                                                                                                     |
|-------------------------------------------------------------------------------------------------------------------------------|-------------------------------------------------------------------------------------------------------------------------------------------------------------|-----------------------------------------------------------------------------------------------------------------------------------------------------|
| Lowrey, Blake<br>PhD Student<br>Montana State University<br>United States of America (the)                                    | Lowther, Jason<br>Associate Professor in Law<br>University of Plymouth<br>United Kingdom of Great Britain and Northern Ireland (the)                        | Loy, Anna<br>Associate Professor in Zoology<br>Università del Molise<br>Italy                                                                       |
| Loyau, Adeline<br>Researcher<br>Helmholtz Centre for Environmental Research-UFZ<br>Germany                                    | Loyd, Destiny<br>Ecology<br>University of Georgia<br>United States of America (the)                                                                         | Loye, Jenella *<br>Research associate UCD and CFO Carroll-Loye Biological Research<br>University California Davis<br>United States of America (the) |
| Loyer, Lilian<br>Atmospheric Science<br>France                                                                                | Loyn, Richard<br>Director<br>Eco Insights<br>Australia                                                                                                      | Loyola, Rafael<br>Professor<br>Universidade Federal de Goiás<br>Brazil                                                                              |
| Lozada, Tannya<br>Biology<br>UDLA<br>Ecuador                                                                                  | Lozano, Jorge<br>PostDoc Researcher in Ecology<br>Leuphana University of Lüneburg<br>Germany                                                                | Lu, Mei-Yeh<br>Associate Research Specialist<br>Biodiversity Research Center, Academia Sinica<br>Taiwan                                             |
| Lu, Xiankai<br>Associate Professor<br>Lu<br>China                                                                             | Lubin, Yael<br>Professor Emerita<br>Ben-Gurion University of the Negev<br>Israel                                                                            | Luby, Stephen<br>Professor, Infectious Diseases and Geographic Medicine<br>Stanford University<br>United States of America (the)                    |
| Lucas, Amanda<br>Evolutionary Psychologist<br>Exeter University<br>United Kingdom of Great Britain and Northern Ireland (the) | Lucas, Jeffrey<br>Professor of Biological Sciences<br>Purdue University<br>United States of America (the)                                                   | Lucas, Pablo M.<br>Postdoc/Ecology<br>Institute of Nature Conservation (PAS)<br>Poland                                                              |
| Lucas, Richard<br>Adjunct Professor<br>University of New South Wales<br>Australia                                             | Lucas, Robert<br>CEO<br>Field Studies Council<br>United Kingdom of Great Britain and Northern Ireland (the)                                                 | Lucas, Robyn<br>Professor and Head, National Centre for Epidemiology and Population Health<br>Australian National University<br>Australia           |
| Lucci Freitas, Andre Victor<br>Full Professor<br>Department of Animal Biology, Campinas State University<br>Brazil            | Luce, Aidan<br>MSc Arch: Advanced Environment and Energy Studies<br>University of East London<br>United Kingdom of Great Britain and Northern Ireland (the) | Lucena, Emerson<br>Professor of Biology<br>Universidade Estadual de Santa Cruz (UESC)<br>Brazil                                                     |

|                                                                                                                                                                                                 |                                                                                                                                        |                                                                                                                                                                                                                                      |
|-------------------------------------------------------------------------------------------------------------------------------------------------------------------------------------------------|----------------------------------------------------------------------------------------------------------------------------------------|--------------------------------------------------------------------------------------------------------------------------------------------------------------------------------------------------------------------------------------|
| Lucena, Juan<br>Professor<br>UAM<br>Spain                                                                                                                                                       | Lucero, Sergio<br>Tecnico Curador, Mammalogy<br>Museo Argentino de Ciencias Naturales "Bernardino<br>Rivadavia"<br>Argentina           | Lucero Mosquera, Hernan<br>Lecturer<br>Universidad Técnica Particular de Loja<br>Ecuador                                                                                                                                             |
| Lucero Mosquera, Hernán *<br>University Lecturer<br>Universidad Técnica Particular de Loja<br>Ecuador                                                                                           | Lucey, Noelle<br>Postdoc/ Marine Biology<br>Smithsonian Tropical Research Institute<br>Panama                                          | Lucifora, Luis<br>Conservation Biology, Aquatic Ecology, Ichthyology.<br>Instituto de Biología Subtropical - Iguazú, Universidad<br>Nacional de Misiones, Consejo Nacional de<br>Investigaciones Científicas y Técnicas<br>Argentina |
| Lucinda, Paulo<br>Professor and Curator of Fishes/ Phylogenetic<br>Systematics, Zoological Nomenclature, Vertebrate<br>Zoology<br>Universidade Federal do Tocantins at Porto Nacional<br>Brazil | Luck, Gary<br>Adjunct Professor of Ecology and Interdisciplinary Science<br>Charles Sturt University<br>Australia                      | Luckau, Tara<br>Staff Research Associate<br>University of California, Los Angeles<br>United States of America (the)                                                                                                                  |
| Lücking, Robert<br>Curator<br>Botanical Garden and Botanical Museum, Freie<br>Universität Berlin<br>Germany                                                                                     | Luco Rocha da Silva, Gabriel<br>UNESP<br>Brazil                                                                                        | Ludden, Maizy<br>Undergraduate Biology Student<br>Syracuse University<br>United States of America (the)                                                                                                                              |
| Ludwików, Agnieszka<br>Professor, Dept of Biotechnology<br>Adam Mickiewicz University, Poznań<br>Poland                                                                                         | Luers, Lori<br>United States of America (the)                                                                                          | Lugo, Rafael<br>Mestrando pelo Programa de Pós-Graduação em<br>Zoologia da PUCRS<br>PUCRS<br>Brazil                                                                                                                                  |
| Lugo-Ibarra, Maria-Guadalupe<br>PhD science Post-harvest<br>Center of Research in Food and Development<br>Mexico                                                                                | LUGON, Ana Paula<br>Brazil                                                                                                             | Luis, Gil de Sola<br>Marine biologist<br>Instituto Español de Oceanografía<br>Spain                                                                                                                                                  |
| Luizzi, Victoria<br>Ecology and Evolutionary Biology--student<br>United States of America (the)                                                                                                 | Luja, Victor Hugo<br>Proffessor/Biology<br>Universidad Autónoma de Nayarit<br>Mexico                                                   | Lukas, Kristen<br>Conservation Science<br>Cleveland Metroparks Zoo & Case Western Reserve<br>University<br>United States of America (the)                                                                                            |
| Łukaszewicz, Marcin<br>Professor Biotechnology<br>University of Wroclaw, Faculty of Biotechnology<br>Poland                                                                                     | Luker, Sally<br>Academic researcher - ecology<br>University of Exeter<br>United Kingdom of Great Britain and Northern Ireland<br>(the) | Luksenburg, Jolanda<br>Affiliate Professor<br>George Mason University<br>United States of America (the)                                                                                                                              |



|                                                                                                         |                                                                                                                           |                                                                                                                                                     |
|---------------------------------------------------------------------------------------------------------|---------------------------------------------------------------------------------------------------------------------------|-----------------------------------------------------------------------------------------------------------------------------------------------------|
| Luna, Belén<br>Spain                                                                                    | Luna, Emerson<br>Reader<br>Federal University of Rio Grande do Sul<br>Brazil                                              | Luna, Leilton Willians<br>PhD Student (Zoology/Environmental Biology)<br>Museu Paraense Emílio Goeldi/Universidade Federal do Pará<br>Brazil        |
| Luna-Laurent, Emilie<br>Environmental Scientist<br>France                                               | Luna-Mora, Victor *<br>Biology<br>University of Tolima<br>Colombia                                                        | Lunazzi, José Joaquín<br>Prof. Dr. Physics<br>Campinas State University<br>Brazil                                                                   |
| Lund, Jessie<br>Research Technician and Lab Manager, Marine Biology<br>University of Victoria<br>Canada | Lundgren, Erick<br>PhD Student<br>University of Technology Sydney<br>Australia                                            | Lundgren, Jonathan<br>Director<br>Ecdysis Foundation<br>United States of America (the)                                                              |
| Lundqvist, Hans<br>Professor emeritus<br>Swedish University of Agricultural Sciences (SLU)<br>Sweden    | Lunghi, Enrico<br>PhD student - Biogeography<br>University of Trier<br>Italy                                              | Luoma, Daniel<br>Research Professor, Forest Mycology and Ecology<br>College of Forestry, Oregon State University<br>United States of America (the)  |
| Luporini, Pierangelo<br>Prof/Zoology<br>University of Camerino<br>Italy                                 | LUPU, Gabriel<br>Senior Scientist - Entomology<br>Danube Delta National Institute for Research and Development<br>Romania | Luque, Ángel<br>Titular Professor (Zoology and Marine Biology)<br>Biology Department, Universidad Autónoma de Madrid<br>Spain                       |
| Luque, Javier<br>PhD Candidate, Biological Sciences<br>University of Alberta<br>Canada                  | LUQUE-LARENA, JUAN JOSE<br>ASSOCIATE PROFESSOR<br>UNIVERSIDAD DE VALLADOLID<br>Spain                                      | Luscher, Bernhard<br>Professor of Biology, Biochemistry and Molecular Biology<br>Penn State University<br>United States of America (the)            |
| Lush, Mike<br>Ecologist<br>United Kingdom of Great Britain and Northern Ireland (the)                   | Lushchak, Volodymyr<br>professor<br>Precarpatian national university<br>Ukraine                                           | Lutton, Bram<br>Associate Professor of Biology and Biotechnology<br>Endicott College<br>United States of America (the)                              |
| Lutz, Eleanor<br>PhD Candidate, Biology<br>University of Washington<br>United States of America (the)   | Lutz, Ilka<br>Biologist<br>Leibniz-Institute of Freshwater Ecology and Inland Fisheries<br>Germany                        | Lutz, Matthias<br>Guest Scientist/Mycology<br>2University of Tübingen, Plant Evolutionary Ecology,<br>Institute of Evolution and Ecology<br>Germany |
| Luusua, Anna<br>Post-Doctoral Researcher, Architecture<br>University of Oulu<br>Finland                 | Luyckx, Marie<br>PhD student and teaching assistant<br>Université Catholique de Louvain-la-Neuve (UCL)<br>Belgium         | Luyssaert, Sebastiaan<br>forest-atmosphere interactions<br>VU Amsterdam<br>Netherlands (the)                                                        |

|                                                                                                                                                                        |                                                                                                |                                                                                                                           |
|------------------------------------------------------------------------------------------------------------------------------------------------------------------------|------------------------------------------------------------------------------------------------|---------------------------------------------------------------------------------------------------------------------------|
| Luz, Adriana *                                                                                                                                                         | Luz, Lafayette                                                                                 | LUZ, RENAN GUSTAVO RODRIGUES                                                                                              |
| Professor / Gynecology and obstetric<br>University State of Campinas-UNICAMP<br>Brazil                                                                                 | Professor<br>Federal University do Bahia<br>Brazil                                             | Master degree student of Animal Science<br>Universidade Federal do Paraná - UFPR<br>Brazil                                |
| Luzuriaga, Arantzazu L.                                                                                                                                                | Lyall, Joanna                                                                                  | Lyle, Peter                                                                                                               |
| lecturer<br>Universidad Rey Juan Carlos<br>Spain                                                                                                                       | Ecologist and Masters Candidate, Life Science<br>University of Tasmania<br>Australia           | Participatory and Interaction Design Postdoctoral<br>Researcher<br>Madeira Interactive Technologies Institute<br>Portugal |
| Lyman, Rachel                                                                                                                                                          | Lynch, Catherine                                                                               | Lynch, Maureen                                                                                                            |
| PhD Candidate<br>Washington University in St. Louis<br>United States of America (the)                                                                                  | Ecologist<br>Australia                                                                         | United States of America (the)                                                                                            |
| Lynn, William                                                                                                                                                          | Lyon, Bethany                                                                                  | Lyon, Bobi                                                                                                                |
| Research Scientist<br>Marsh Institute of Clark University<br>United States of America (the)                                                                            | Doctoral Candidate, Psychology<br>Louisiana State University<br>United States of America (the) | Psychology/Recreation Leader<br>Borough Of Wildwood Crest<br>United States of America (the)                               |
| Lyons, Shelby                                                                                                                                                          | M, Subbiah                                                                                     | M. Flores, Bernardo                                                                                                       |
| PhD Candidate in Geosciences<br>Penn State University<br>United States of America (the)                                                                                | Assistant Professor Mathematics<br>LNGC<br>India                                               | Post-doc / Ecology<br>Unicamp<br>Brazil                                                                                   |
| M. Koch, Natalia                                                                                                                                                       | M. Lobo, Jorge                                                                                 | M. Machado, Talita                                                                                                        |
| Postdoctoral Researcher<br>Universidade Federal de Mato Grosso do Sul, UFMS<br>Brazil                                                                                  | Research professor<br>MNCN. CSIC<br>Spain                                                      | Researcher in Plant Systematics<br>Museu Paraense Emílio Goeldi<br>Brazil                                                 |
| M. Rocha, Rosana                                                                                                                                                       | M. Vale, Mariana                                                                               | Ma. de los Angeles, Herrera-Vega                                                                                          |
| Professor Titular em Zoologia (Full professor - Zoology)<br>Universidade Federal do Paraná<br>Brazil                                                                   | Associate Professor<br>Federal University of Rio de Janeiro<br>Brazil                          | M. en C. Laboratorio de Genetica<br>Instituto de Ciencias del Mar y Limnologia UNAM<br>Mexico                             |
| Maas, Bea                                                                                                                                                              | Mac Andrew, Steven                                                                             | MacAdams, Jeffrey                                                                                                         |
| PostDoc<br>University of Vienna - Department of Botany and<br>Biodiversity Research - Division of Conservation Biology,<br>Vegetation and Landscape Ecology<br>Austria | Social Scientist<br>STIA<br>Suriname                                                           | MSc Environmental Studies<br>University of Victoria<br>Canada                                                             |
| Macario, Alessandro                                                                                                                                                    | Macario, Phoebe                                                                                | Maccagnani, Bettina                                                                                                       |
| Associate Lecturer in Animal Behaviour<br>United Kingdom of Great Britain and Northern Ireland<br>(the)                                                                | PhD student (Ecology)<br>Universidade Federal do Rio Grande do Norte<br>Brazil                 | Italy                                                                                                                     |

|                                                                                                                             |                                                                                                         |                                                                                                                                                                                                                                |
|-----------------------------------------------------------------------------------------------------------------------------|---------------------------------------------------------------------------------------------------------|--------------------------------------------------------------------------------------------------------------------------------------------------------------------------------------------------------------------------------|
| Maccagnani, Bettina.<br>Apidologist, PuR, self employed<br>Bettina.maccagnani@gmail.com<br>Italy                            | MacCarthy, James<br>Graduate Student<br>Duke University<br>United States of America (the)               | Macchi, Leandro<br>Researcher<br>CONICET<br>Germany                                                                                                                                                                            |
| Macdonald, Hannah<br>PhD graduate in Conservative Genetics<br>United Kingdom of Great Britain and Northern Ireland<br>(the) | Macdonald, Ian A W<br>International Environmental Consultant<br>Independent<br>South Africa             | MacDonald, Michael<br>Graduate Student / Ecology<br>Montana State University<br>United States of America (the)                                                                                                                 |
| Macdonald, Stewart<br>Ecologist<br>James Cook University<br>Australia                                                       | Macdonald, Stuart<br>Restoration Ecologist<br>University of Tasmania<br>Australia                       | Macedo, Leandro<br>PhD student<br>Universidade Federal do Rio de Janeiro<br>Brazil                                                                                                                                             |
| Macedo, Regina<br>Professor<br>University of Brasilia<br>Brazil                                                             | Macedo, Tahysa<br>University Teacher<br>UNIRIO<br>Brazil                                                | Macerollo, Antonella<br>Neurologist PhD candidate<br>University College of London<br>United Kingdom of Great Britain and Northern Ireland<br>(the)                                                                             |
| MacFadyen, Duncan *<br>Zoologist<br>E Oppenheimer & Son<br>South Africa                                                     | Macfarlane, Craig<br>Adjunct Senior Lecturer<br>The University of Western Australia<br>Australia        | Macfarlane, Magnus<br>Senior Socio-economic Consultant<br>Independent<br>United Kingdom of Great Britain and Northern Ireland<br>(the)                                                                                         |
| Machado, Anderson F. P.<br>Plant Systematics<br>Universidade Federal do Recôncavo da Bahia (UFRB)<br>Brazil                 | Machado, Caio Graco *<br>Professor / Bird Ecology<br>State University of Feira de Santana<br>Brazil     | Machado, Carlos Saldanha<br>Full Professor<br>Oswaldo Cruz Foundation (FIOCRUZ/Ministry of Health)<br>Brazil                                                                                                                   |
| Machado, Daniel<br>Post-doctoral researcher in Computational Biology<br>European Molecular Biology Laboratory<br>Germany    | Machado, Francisco<br>Professor of Philosophy<br>Universidade Federal de São Paulo<br>Brazil            | Machado, Gisela<br>Machado<br>Portugal                                                                                                                                                                                         |
| Machado, Luiz Augusto *<br>Researcher<br>Machado<br>Brazil                                                                  | Machado, Margarida<br>Retired biologist<br>Centre of Marine Sciences, University of Algarve<br>Portugal | Machado, Marlon Magno Monteiro<br>Master's in Development Practice / Master's in Science<br>Education and PhD candidate.<br>Universidade Federal Rural do Rio de Janeiro /<br>Universidade Federal do Rio de Janeiro<br>Brazil |

|                                                                                                                                               |                                                                                                                                        |                                                                                                                                           |
|-----------------------------------------------------------------------------------------------------------------------------------------------|----------------------------------------------------------------------------------------------------------------------------------------|-------------------------------------------------------------------------------------------------------------------------------------------|
| Machado Allison, Carlos<br>Biologist<br>Venezuelan Academy of Natural Sciences, Physics and Mathematics<br>Venezuela (Bolivarian Republic of) | Machado Filho, Paulo Roberto<br>Ph.D. Student in Zoology<br>MZUSP - Museu de Zoologia da USP<br>Brazil                                 | Machado-Allison, Antonio<br>Full Professor Biology<br>Instituto Zoología y Ecología Tropical U.C.V.<br>Venezuela (Bolivarian Republic of) |
| Machado-de-Souza, Tiago<br>PhD student in Ecology and Conservation<br>Federal University of Paraná<br>Brazil                                  | Machaka-Houri, Nisrine<br>Environmental expert and instructor<br>Saint Joseph University<br>Lebanon                                    | Macheda, Desire'<br>researcher<br>Universitat Koblenz-Landau<br>Germany                                                                   |
| Macheriotou, Lara<br>PhD student<br>Ghent University<br>Belgium                                                                               | Machin, Francisco<br>Lecturer<br>University of Las Palmas de Gran Canaria<br>Spain                                                     | Machon, Nathalie<br>Professor<br>National Museum of Natural History<br>France                                                             |
| Machordom, Annie<br>Senior Researcher<br>Museo Nacional de Ciencias Naturales (MNCN-CSIC)<br>Spain                                            | Machu, Eric<br>Researcher<br>IRD<br>France                                                                                             | Machuche, Joyce<br>Student of Food Science and technology<br>University Eduardo Mondlane<br>Mozambique                                    |
| Macía, Manuel J.<br>Associate Professor<br>Universidad Autónoma de Madrid<br>Spain                                                            | Macías Garcia, Constantino<br>Biology; Researcher<br>Instituto de Ecología, UNAM<br>Mexico                                             | Maciá-Vicente, Jose G.<br>Academic Researcher in Microbial Ecology<br>Goethe Universität Frankfurt<br>Germany                             |
| Macieira, Raphael<br>Full professor<br>Universidade Vila Velha<br>Brazil                                                                      | Maciejewska, Agnieszka M.<br>Ph.D, Molecular Biology<br>Institute of Biochemistry and Biophysics, Polish Academy of Sciences<br>Poland | Maciel, Israel<br>PhD Student<br>Federal Rural University of Rio de Janeiro<br>Brazil                                                     |
| Maciel, Natan<br>Associate Professor of Biological Sciences<br>Universidade Federal de Goiás<br>Brazil                                        | Maciel Lyra, Paulo Roberto<br>Full Professor<br>Federal University of Pernambuco<br>Brazil                                             | Macinnis-Ng, Cate<br>Senior Lecturer in Ecology<br>University of Auckland<br>New Zealand                                                  |
| MacKay, Fiona<br>Senior Scientist, Marine Ecologist<br>Oceanographic Research Institute<br>South Africa                                       | MacKay, Jamie<br>Senior Ecologist<br>Wildland Consultants Ltd<br>New Zealand                                                           | MacKay, Mary<br>PhD student Behavioural economist<br>Centre for Marine Socioecology, The University of Tasmania<br>Australia              |
| MacKenzie, James<br>Specialist Ecologist: rivers and wetlands<br>Private Consultant<br>South Africa                                           | MacKichan, Joanna<br>Senior Lecturer in Microbiology<br>Victoria University of Wellington<br>New Zealand                               | Macklin, Andrew MacKendrick<br>Research Technician<br>Princess Margaret Cancer Centre<br>Canada                                           |

|                                                                                                                                                         |                                                                                                                                                                            |                                                                                                                          |
|---------------------------------------------------------------------------------------------------------------------------------------------------------|----------------------------------------------------------------------------------------------------------------------------------------------------------------------------|--------------------------------------------------------------------------------------------------------------------------|
| <p>Maclean, Ilya<br/>Senior Lecturer in Natural Environment<br/>University of Exeter<br/>United Kingdom of Great Britain and Northern Ireland (the)</p> | <p>Macleod, Adrian<br/>post-doctoral research scientist<br/>The Scottish Association for Marine science<br/>United Kingdom of Great Britain and Northern Ireland (the)</p> | <p>macleod, gordon<br/>Chiropractor<br/>New Zealand</p>                                                                  |
| <p>Maclin, Edward<br/>Anthropology Instructor<br/>University of Memphis<br/>United States of America (the)</p>                                          | <p>Macpherson, Enrique<br/>Research Professor<br/>Spanish Research Council (CEAB-CSIC)<br/>Spain</p>                                                                       | <p>Macreadie, Peter<br/>Marine Scientist<br/>Deakin University<br/>Australia</p>                                         |
| <p>Madden, Hannah<br/>Director/Terrestrial Ecologist<br/>Ecological Professionals Foundation<br/>Bonaire, Sint Eustatius and Saba</p>                   | <p>Madden, Helen<br/>Madden<br/>New Zealand</p>                                                                                                                            | <p>Maddi, Franck<br/>Project manager - Botany<br/>L'Herminier Natural History Society (SHNLH)<br/>France</p>             |
| <p>MADDISON, PETER<br/>Entomologist<br/>Field Studies<br/>New Zealand</p>                                                                               | <p>Madeira, Camila<br/>Graduate Assistant - Environmental Engineering<br/>University of Arizona<br/>United States of America (the)</p>                                     | <p>Madelrieux, Sophie<br/>Irstea<br/>France</p>                                                                          |
| <p>Madin, Elizabeth<br/>Research Fellow in Marine Conservation Ecology<br/>Macquarie University<br/>Australia</p>                                       | <p>Madin, Joshua<br/>Associate Professor in Ecology and Evolution<br/>Macquarie University<br/>Australia</p>                                                               | <p>Madkour, Fedekar<br/>Professor<br/>Port Said University<br/>Egypt</p>                                                 |
| <p>Madrak, Sheila<br/>Wildlife Ecologist/Adjunct Professor of Biology<br/>AECOM/San Diego Miramar College<br/>United States of America (the)</p>        | <p>Madrigal, Jaime<br/>Associate Researcher in Ecology<br/>Universidad de Alcalá<br/>Spain</p>                                                                             | <p>Madurell, Teresa<br/>Researcher<br/>Institute of Marine Sciences<br/>Spain</p>                                        |
| <p>Maeir, Aren<br/>Archaeology<br/>Bar-Ilan University<br/>Israel</p>                                                                                   | <p>Maes, Jean-Michel<br/>Entomologist<br/>Museo Entomologico de Leon<br/>Nicaragua</p>                                                                                     | <p>Mafantiri, Tsitso<br/>Range Resources Management Officer<br/>Department of Range Resources Management<br/>Lesotho</p> |
| <p>Mafra, Álvaro Luiz<br/>Professor<br/>Santa Catarina State University<br/>Brazil</p>                                                                  | <p>Magal, Boaz<br/>Science Teacher<br/>Rose Bay Secondary College<br/>Australia</p>                                                                                        | <p>Magalhães, Ana Luisa<br/>occupational therapist<br/>Casa do Adolescente<br/>Brazil</p>                                |
| <p>Magalhães, José<br/>PhD student Ecology<br/>Universidade Federal do Pará<br/>Brazil</p>                                                              | <p>Magee, Madeline<br/>Postdoctoral Research Fellow<br/>University of Wisconsin - Madison<br/>United States of America (the)</p>                                           | <p>Magel, Jennifer<br/>MSc Student<br/>University of Victoria<br/>Canada</p>                                             |

|                                                                                                                                                                        |                                                                                                                                                                                                                                                  |                                                                                                                         |
|------------------------------------------------------------------------------------------------------------------------------------------------------------------------|--------------------------------------------------------------------------------------------------------------------------------------------------------------------------------------------------------------------------------------------------|-------------------------------------------------------------------------------------------------------------------------|
| Magellan, Kit<br>Research Scientist: behavioural, aquatic, invasion ecology and climate change<br>University of Hong Kong<br>Hong Kong                                 | Mager, Klaus<br>Independent Food Service Professional<br>Food with Thought<br>United States of America (the)                                                                                                                                     | Mager, Svenja<br>PhD Student<br>Germany                                                                                 |
| Maggs, Gwen<br>Scientist<br>Durrell Wildlife Conservation Trust<br>United Kingdom of Great Britain and Northern Ireland (the)                                          | Maggs, Jade<br>Fisheries Scientist<br>Oceanographic Research Institute<br>South Africa                                                                                                                                                           | Magini, Ariana<br>Honours Student, Conservation Science<br>University of Queensland<br>Australia                        |
| Magliaro, Chiara<br>Post-Doctoral Researcher<br>Research Center "E.Piaggio"- University of Pisa<br>Italy                                                               | Magnago, Luiz Fernando Silva<br>Research Fellow<br>Universidade Federal de Lavras<br>Brazil                                                                                                                                                      | Magney, David<br>Rare Plant Program Manager/Botany<br>California Native Plant Society<br>United States of America (the) |
| Magno Amaral, Fernanda<br>Phd student / climate change<br>ZFMK - Zoologisches Forschungsmuseum Alexander Koenig<br>Germany                                             | Magnuson, Sharon<br>Genomic Lab Coordinator<br>Texas A&M Corpus Christi<br>United States of America (the)                                                                                                                                        | Magrach, Ainhoa<br>Postdoctoral researcher<br>Basque Centre for Climate Change (BC3)<br>Spain                           |
| Magrane, Eric<br>Visiting Assistant Professor<br>New Mexico State University<br>United States of America (the)                                                         | Maguiño, Rossana<br>Biologist<br>Peru                                                                                                                                                                                                            | Maguire, Rena<br>PhD<br>QUB Belfast<br>Ireland                                                                          |
| Mahajan, Yatin<br>Research fellow<br>Western Sydney University<br>Australia                                                                                            | Mahala, Buyiswa<br>Scientist Production<br>Amathole Museum<br>South Africa                                                                                                                                                                       | Mahar, Jackie<br>Postdoctoral associate in evolutionary virology<br>University of Sydney<br>Australia                   |
| Maharaj, Sandeep<br>Lecturer<br>The University of the West Indies<br>Trinidad and Tobago                                                                               | Mahdavi, Ahmad<br>Insect/ pesticides/ chemicals/ biocides environmental regulatory toxicologist/ professor emeritus at University of Tehran.<br>University of Tehran/ and Sustainable agriculture and environment.<br>Iran (Islamic Republic of) | Maher, Ray<br>Sustainability knowledge systems & Design<br>The University of Queensland<br>Australia                    |
| Maher, Rj Daniel<br>Adjunct Faculty, Environmental Science, English and Communication<br>California State University Channel Islands<br>United States of America (the) | Maheshwari, Basant<br>Professor<br>Western Sydney University<br>Australia                                                                                                                                                                        | Mahiques, Michel<br>Full Professor<br>University of São Paulo<br>Brazil                                                 |

|                                                                                                                                                                                             |                                                                                                                                                           |                                                                                                                           |
|---------------------------------------------------------------------------------------------------------------------------------------------------------------------------------------------|-----------------------------------------------------------------------------------------------------------------------------------------------------------|---------------------------------------------------------------------------------------------------------------------------|
| Mahler, Lisa<br>PhD student, microbiology and microfluidics<br>Leibniz-Institute for Natural Product Research and<br>Infection Biology -Hans-Knöll-Institut-, Jena<br>Germany               | Mahmoodi, Mohammad<br>Assistant Professor in Plant Ecology & Taxonomy<br>Research Institute of Forest and Rangelands (RIFR)<br>Iran (Islamic Republic of) | Mahmoodi, Mohammad Bashir<br>Assistant professor<br>Badghis higher education institution<br>Afghanistan                   |
| Mahmud, Anisul Islam<br>Department of Biology<br>Vrije Universiteit Brussels<br>Bangladesh                                                                                                  | Mahmud, Husayn<br>United Kingdom of Great Britain and Northern Ireland<br>(the)                                                                           | Mahnkopf, Judith<br>Geographer<br>Leibniz-Institute of Freshwater Ecology and Inland<br>Fisheries<br>Germany              |
| Mahood, Simon<br>Charles Darwin University<br>Australia                                                                                                                                     | Mahr, Katharina<br>Post-Doc<br>University of Veterinary Medicine<br>Austria                                                                               | Mahu, Edem<br>Lecturer<br>Department of Marine and Fisheries Sciences, University<br>of Ghana<br>Ghana                    |
| Mahuika, Jenny<br>Research Student<br>University of Queensland<br>Australia                                                                                                                 | Maia, Marcia<br>CNRS senior scientist, Marine Geophysics and<br>Geodynamics<br>Institut Universitaire Européen de la Mer<br>France                        | Maia, Monique<br>Masters in Ecology<br>National Research Institute of the Amazon<br>Brazil                                |
| Maicher, Doris<br>Earth Sciences<br>GEOMAR Helmholtz Centre for Ocean Research<br>Germany                                                                                                   | Maida, Carl<br>Public Health and Environmental Sciences<br>University of California, Los Angeles<br>United States of America (the)                        | Maiese, Carl<br>Ecologist/ Physiologist<br>United States of America (the)                                                 |
| Maignan, Fabienne<br>Engineer/Researcher<br>Laboratoire des Sciences du Climat et de l'Environnement<br>France                                                                              | Mailleret, Ludovic<br>Research Scientist<br>Université Côte d'Azur, INRA, CNRS, Inria<br>France                                                           | Mairal, Mario<br>Post-doctoral researcher in Biology<br>Charles University<br>Czech Republic (the)                        |
| Maisels, Fiona<br>Conservation Scientist<br>(i) Wildlife Conservation Society (ii) University of Stirling,<br>Scotland, UK<br>United Kingdom of Great Britain and Northern Ireland<br>(the) | Maistrello, Lara<br>Researcher in General and Applied Entomology<br>University of Modena and Reggio Emilia, Dept. Life<br>Sciences<br>Italy               | Maitland, Bryan<br>Conservation/Aquatic biologist, PhD student<br>University of Wyoming<br>United States of America (the) |
| Majaneva, Markus<br>Norway                                                                                                                                                                  | Majaneva, Sanna<br>UiT the Arctic University of Norway<br>Norway                                                                                          | Majer, Jonathan<br>Adjunct professor<br>University of Western Australia<br>Australia                                      |

|                                                                                                                             |                                                                                                                                         |                                                                                                                           |
|-----------------------------------------------------------------------------------------------------------------------------|-----------------------------------------------------------------------------------------------------------------------------------------|---------------------------------------------------------------------------------------------------------------------------|
| Majewska, Roksana<br>post-doctoral researcher/marine biologist<br>North-West University<br>South Africa                     | Makena, Maryanne<br>MSC. Conservation Biology<br>The University of Nairobi<br>Kenya                                                     | Makol, Joanna<br>Professor, biology (zoology)<br>Wrocław University of Environmental and Life Sciences<br>Poland          |
| Makower, Katharina<br>Postdoctoral Researcher<br>Liebniz/Institute of Freshwater Ecology and Inland<br>Fisheries<br>Germany | Makowska, Nicoletta<br>PhD student<br>Department of Microbiology, Faculty of Biology, Adam<br>Mickiewicz University in Poznań<br>Poland | Malabarba, Luiz<br>Professor Ichthyology<br>Universidade Federal do Rio Grande do Sul<br>Brazil                           |
| Malagoli, Davide<br>Associate Professor of Comparative Anatomy<br>University of Modena and Reggio Emilia<br>Italy           | Malagoli, Leo<br>PhD candidate in Zoology<br>Universidade Estadual Paulista (UNESP), Campus de Rio<br>Claro, SP<br>Brazil               | Malano, Hector<br>Professor (ret'd)<br>University of Melbourne<br>Australia                                               |
| Malaquias, Manuel<br>Associate Professor<br>University of Bergen<br>Norway                                                  | Malaquias Souto, Paula<br>PhD student in Animal Biology<br>Universidade Federal do Espírito Santo<br>Brazil                             | Malatos, Joseph<br>Veterinary Anatomic Pathology Resident<br>Cornell University and WCS<br>United States of America (the) |
| Malats, Núria *<br>Senior Group Leader<br>Spanish National Cancer Research Centre (CNIO)<br>Spain                           | Malausa, Thibaut<br>Researcher<br>Institut National de la Recherche Agronomique<br>France                                               | Malay, Machel<br>marine biology<br>University of the Philippines Visayas<br>Philippines (the)                             |
| Maldonado, Alejandra<br>PhD Candidate<br>Texas A&M University<br>United States of America (the)                             | Maldonado, Ana<br>Graduate Student<br>CNIO<br>Mexico                                                                                    | Maldonado, Diego E.<br>Biologist<br>Bolivia (Plurinational State of)                                                      |
| Maldonado, Ernesto<br>Principal Investigator<br>Universidad Nacional Autónoma de México (UNAM)<br>Mexico                    | Maldonado, Mayra L.<br>Ecologist<br>Guatemala                                                                                           | Maldonado Ocampo, Javier Alejandro<br>Head, Biology Department<br>Pontificia Universidad Javeriana<br>Colombia            |
| Malé, Pierre-Jean<br>Postdoc in Evolutionary Biology<br>Harvard University<br>United States of America (the)                | Malecki, Jakub<br>glaciologist<br>Adam Mickiewicz University<br>Poland                                                                  | Malej, Alenka<br>retired marine biologist<br>Marine Biology Station Piran, NIB<br>Slovenia                                |
| Malekani, Jean<br>Professor, Biology<br>University of Kinshasa<br>Congo (the Democratic Republic of the)                    | Malhotra, Anita<br>Senior Lecturer<br>Bangor University<br>United Kingdom of Great Britain and Northern Ireland<br>(the)                | Malik, Sumi<br>City/Environmental Planner<br>CH2M<br>United States of America (the)                                       |



|                                                                                                                                                   |                                                                                                                           |                                                                                                                                        |
|---------------------------------------------------------------------------------------------------------------------------------------------------|---------------------------------------------------------------------------------------------------------------------------|----------------------------------------------------------------------------------------------------------------------------------------|
| Malinowska, Agata<br>Proteomics<br>IBB Polish Academy of Sciences<br>Poland                                                                       | Malinowski, Szymon<br>professor, atmospheric physics<br>University of Warsaw<br>Poland                                    | Malins, Chris<br>Alternative fuels policy consultant<br>Cerology<br>United Kingdom of Great Britain and Northern Ireland (the)         |
| Malla, Aaliyah<br>Marine Science Student<br>Scottish Association for Marine Science<br>United Kingdom of Great Britain and Northern Ireland (the) | Mallarach, Josep Maria<br>PhD Biodlogy, MSC Environmental Sciences<br>Independent consultant<br>Spain                     | Mallmann Büneker, Henrique<br>Universidade Federal de Santa Maria<br>Brazil                                                            |
| Mallory, Ellen<br>Associate Professor of Sustainable Agriculture<br>University of Maine<br>United States of America (the)                         | MALM, OLAF<br>Professor<br>Universidade Federal do Rio de Janeiro<br>Brazil                                               | Malmcrona Friberg, Kristin<br>Research fellow, Circular economy<br>Business school - Exeter university<br>Sweden                       |
| Malo, Aurelio<br>Evolutionary Ecology<br>University of Oxford<br>United Kingdom of Great Britain and Northern Ireland (the)                       | Malone, John<br>Assistant Professor<br>University of Connecticut<br>United States of America (the)                        | Maloney, Megan<br>Geography<br>Appalachian State University<br>United States of America (the)                                          |
| Malpica Cruz, Luis<br>PhD Candidate, Biology<br>Simon Fraser University/ECOCIMATI A.C.<br>Canada                                                  | Maltby, Katherine<br>PhD Researcher<br>University of Exeter<br>United Kingdom of Great Britain and Northern Ireland (the) | Malthus, Tim<br>Research Group Leader<br>CSIRO Oceans and Atmosphere<br>Australia                                                      |
| Malusa, Jim<br>Research Scientist<br>School of Natural Resources and the Environment,<br>University of Arizona<br>United States of America (the)  | Maman, Jacob<br>Molecular Biology<br>UMass Amherst<br>United States of America (the)                                      | Mamede, Maria Candida H<br>Scientific Researcher/Curator of Phanerogams,<br>Herbarium SP<br>Instituto de Botânica, São Paulo<br>Brazil |
| Mamede da Silva Alves, Renata<br>PhD candidate<br>Marine Biology Section at Ghent University<br>Belgium                                           | Mammides, Christos<br>Associate Professor<br>Guangxi University<br>China                                                  | Mammola, Stefano<br>PostDoc student; Ecologist<br>University of Turin<br>Italy                                                         |
| Mamouridis, Valeria *<br>Independent Researcher<br>Italy                                                                                          | Man, Jarrett<br>Plant Biologist<br>University of Massachusetts Amherst<br>United States of America (the)                  | Manandhar, Prajwol<br>Conservation genetics<br>Center for Molecular Dynamics Nepal (CMDN)<br>Nepal                                     |
| Manarte Lopes Peixoto Neto, Alberto<br>Master in Tropical Forest Sciences<br>INPA (National Institute of Amazonian Research)<br>Brazil            | Mancilla Morales, Misael Daniel *<br>Master in Chemical-Biological Sciences<br>Instituto Politécnico Nacional<br>Mexico   | Manes, Facundo<br>Director<br>INECO<br>Argentina                                                                                       |

|                                                                                                                                                    |                                                                                                                           |                                                                                                                                                  |
|----------------------------------------------------------------------------------------------------------------------------------------------------|---------------------------------------------------------------------------------------------------------------------------|--------------------------------------------------------------------------------------------------------------------------------------------------|
| <p>MANEYRO, Raúl<br/>Zoologist<br/>Universidad de la República<br/>Uruguay</p>                                                                     | <p>Manfrin, Marcos<br/>Undergraduate researcher in cytogenetics<br/>University of Campinas - UNICAMP<br/>Brazil</p>       | <p>Manfrinetti, Pietro<br/>Associate professor. Physical chemistry<br/>Department of Chemistry, University of Genova. Italy<br/>Italy</p>        |
| <p>Manfrini, Marcelo<br/>Archaeology<br/>University of São Paulo<br/>Brazil</p>                                                                    | <p>Manga, Anicet<br/>Faculty member<br/>Université Gaston Berger<br/>Senegal</p>                                          | <p>Manglicmot, Claire<br/>Master's Student<br/>University of Toronto - Royal Ontario Museum<br/>Canada</p>                                       |
| <p>Manguin, Sylvie<br/>Research Professor<br/>IRD<br/>France</p>                                                                                   | <p>Mangwende, Edgar<br/>PhD candidate<br/>University of Pretoria<br/>South Africa</p>                                     | <p>Manica, Lilian<br/>Professor<br/>Universidade Federal do Paraná<br/>Brazil</p>                                                                |
| <p>Mankin, Richard<br/>Research Entomologist<br/>USDA Agricultural Research Service<br/>United States of America (the)</p>                         | <p>Manlay, Raphaël<br/>Senior lecturer, PhD<br/>AgroParisTech<br/>France</p>                                              | <p>Mann, Bruce<br/>Senior scientist, Fishery biologist<br/>Oceanographic Research Institute<br/>South Africa</p>                                 |
| <p>Mann, Jordan<br/>Zoology with Conservation student<br/>Bangor University<br/>United Kingdom of Great Britain and Northern Ireland<br/>(the)</p> | <p>Mann, Judy<br/>Conservation Strategist<br/>SAAMBR<br/>South Africa</p>                                                 | <p>Manna, Vincenzo<br/>Graduate student in Marine Ecology<br/>Stazione Zoologica 'Anton Dohrn'<br/>Italy</p>                                     |
| <p>Manning, Adrian<br/>Professor, Ecology and Conservation Biology<br/>The Australian National University<br/>Australia</p>                        | <p>Mannocci, Laura<br/>Postdoctoral Associate / marine ecology<br/>Duke Univesrity<br/>United States of America (the)</p> | <p>Mansfield, Peter R<br/>Director<br/>Healthy Skepticism Inc<br/>Australia</p>                                                                  |
| <p>Mansfield, Sarah<br/>Senior Scientist<br/>AgResearch<br/>New Zealand</p>                                                                        | <p>Manske, Günther<br/>Academic Coordinator<br/>Center of Development Research (ZEF), University of Bonn<br/>Germany</p>  | <p>Manski, Ben<br/>Sociology<br/>University of California, Santa Barbara<br/>United States of America (the)</p>                                  |
| <p>Mantyka-Pringle, Chrystal<br/>Research Fellow<br/>University of Saskatchewan<br/>Canada</p>                                                     | <p>Manyuk, Vadyum<br/>Docent, Candidate of Biological Sciences<br/>Dnipropetrovsk National University<br/>Ukraine</p>     | <p>Manzano-Marín, Alejandro<br/>Postdoctoral Researcher<br/>INRA UMR1062 - Centre de Biologie pour la Gestion des<br/>Populations<br/>France</p> |
| <p>Manzi, Olivier Jean Léonce<br/>Masters student/ Tropical biodiversity and ecosystems<br/>Free University of Brussels<br/>Belgium</p>            | <p>Mao, Qinggong *<br/>Ecology<br/>South China Botanical Garden<br/>China</p>                                             | <p>Maoela, Malebajoa Anicia<br/>Science Officer<br/>CSIR, South Africa<br/>Lesotho</p>                                                           |

|                                                                                                                                                            |                                                                                                                                        |                                                                                                                 |
|------------------------------------------------------------------------------------------------------------------------------------------------------------|----------------------------------------------------------------------------------------------------------------------------------------|-----------------------------------------------------------------------------------------------------------------|
| Maon, François<br>Associate Professor of Strategy and Corporate Social Responsibility<br>IÉSEG School of Management<br>France                              | Maor, Roi<br>Ecology and Evolution doctoral student<br>Tel Aviv University<br>Israel                                                   | Mappin, Bonnie<br>Phd candidate<br>University of Queensland<br>Australia                                        |
| Marafatto, Francesco Femi<br>Post-doctoral researcher in environmental geochemistry<br>Paul Scherrer Institut / Eawag<br>Switzerland                       | Marais, Ben<br>Professor of Paediatrics and Infectious Diseases<br>University of Sydney<br>Australia                                   | Marais, Mario<br>Community Informatics<br>CSIR<br>South Africa                                                  |
| Marangione, Margaret<br>Professor English<br>Blue Ridge Community College<br>United States of America (the)                                                | Maranhão, Andrea *<br>Professor of Immunology<br>Universidade de Brasilia<br>Brazil                                                    | Marani, Luciano<br>Researcher<br>Instituto Nacional de Pesquisas Espaciais - INPE<br>Brazil                     |
| Marañón, Teodoro<br>Researcher in Forest Ecology<br>IRNAS, CSIC<br>Spain                                                                                   | Marañón-Jiménez, Sara<br>Marie Curie post-doctoral fellow<br>Center for Ecological Research and Forestry Application - CREAM-<br>Spain | Marasco, Valeria<br>Postdoc<br>University of Veterinary Medicine Vienna<br>Austria                              |
| Marazzi, Brigitte<br>Botany curator and scientist<br>Natural History Museum of Canton Ticino, Lugano,<br>Switzerland<br>Switzerland                        | Marc, Regier<br>Prof. Dr.-Ing. Food Process Engineering<br>Trier University of Applied Sciences<br>Germany                             | Marçais, Benoit<br>Senior scientist<br>INRA<br>France                                                           |
| Marcarelli, Amy<br>United States of America (the)                                                                                                          | Marcelino Mendes Cordeiro, Cesar Augusto<br>Postdoctoral<br>Universidade Federal Fluminense<br>Brazil                                  | Marcelo, Kun<br>PHD Professor of Zoology<br>Universidad Nacional del Comahue<br>Argentina                       |
| Marcelo-Peña, José Luis<br>Assistant professor-Botanical<br>Universidad Nacional Agraria La Molina<br>Peru                                                 | Marchã, João<br>Renewable energy researcher<br>Portugal                                                                                | Marchand, Cyril<br>Mangrove Ecology<br>Institut de Recherche pour le Développement<br>France                    |
| Marchant, John H<br>bird population monitoring<br>retired from British Trust for Ornithology<br>United Kingdom of Great Britain and Northern Ireland (the) | Marchant, Rob<br>Professor<br>University York<br>United Kingdom of Great Britain and Northern Ireland (the)                            | Marchante, Elizabete<br>Post doc researcher<br>Centre for Functional Ecology, University of Coimbra<br>Portugal |

|                                                                                                               |                                                                                                                                             |                                                                                                               |
|---------------------------------------------------------------------------------------------------------------|---------------------------------------------------------------------------------------------------------------------------------------------|---------------------------------------------------------------------------------------------------------------|
| Marchante, Hélia<br>Adjunt Professor<br>Escola Superior Agrária, Instituto Politécnico de Coimbra<br>Portugal | Marchetti, Michael<br>Fletcher Jones Professor of Ecology<br>St. Marys College of California<br>United States of America (the)              | Marchio, Elizabeth<br>Ph.D. Candidate<br>Texas A&M<br>United States of America (the)                          |
| Marchiol, Luca<br>PhD, Associate Professor<br>University of Udine<br>Italy                                    | March-Salas, Martí<br>PhD student / Biodiversity and Evolutionary Ecology<br>Museo Nacional de Ciencias Naturales MNCN-CSIC<br>Spain        | Marcil, Catherine<br>Marine Biology student<br>Univesity of Quebec in Rimouski<br>Canada                      |
| Marcinkowski, Jakub<br>Economics<br>Wrocław University of Economics<br>Poland                                 | Marco, Isaia<br>Researcher, Ecology<br>University of Torino<br>Italy                                                                        | Marcolino Polaz, Carla Natacha<br>Environmental Analyst<br>Chico Mendes Institute - ICMBio<br>Brazil          |
| Marcon, Eric<br>Researcher in ecology<br>AgroParisTech<br>France                                              | Marcondes Machado, Fabrizio<br>PhD<br>Universidade Estadual de Campinas<br>Brazil                                                           | Marcos, Eduardo<br>Full Professor of Departamento de Matemática da USP<br>Universidade de São Paulo<br>Brazil |
| MARCQ, Emmanuel<br>Associate Professor<br>Université de Versailles Saint-Quentin<br>France                    | Marcus, W. Andrew<br>Professor of Geography<br>University of Oregon<br>United States of America (the)                                       | Mardones, Fernando<br>Assistant Professor<br>Universidad Andres Bello<br>Chile                                |
| Maree, Bronwyn<br>Conservation - Project leader<br>BirdLife South Africa/FAO<br>South Africa                  | Maree, Sarita<br>Post-doctoral Rresearch Fellow Evolutionary Biology and<br>Conservation Genetics<br>University of Pretoria<br>South Africa | Marengo, Jose<br>R&D Director, Climate change, natural disasters<br>CEMADEN<br>Brazil                         |
| Maret, Tim<br>Professor of Biology<br>Shippensburg University<br>United States of America (the)               | Margalet, Jose Luis<br>Senior Technician Biodiversity Lab.<br>Rey Juan Carlos University<br>Spain                                           | Margalida, Antoni<br>Ramon y Cajal Researcher<br>University of Lleida<br>Spain                                |
| Mari Fanton, Jean Carlo<br>Biologist<br>Museu de Zoologia, IB, UNICAMP<br>Brazil                              | Maria, Tatiana<br>Professor / Introduction to Ecology and Basic Ecology<br>UNIRIO<br>Brazil                                                 | María, Morán-Luis<br>Phd Student/ Ecology<br>University of Oviedo<br>Spain                                    |
| Mariagrazia, Piarulli<br>Biology student<br>Università degli studi di Bari<br>Italy                           | Mariama, Ngom<br>Postdoctoral researcher<br>LCM (IRD/UCAD/ISRA)<br>Senegal                                                                  | Mariano-Neto, Eduardo<br>Full Professor/Ecology<br>Federal University of Bahia<br>Brazil                      |

|                                                                                                                                                   |                                                                                                       |                                                                                                                      |
|---------------------------------------------------------------------------------------------------------------------------------------------------|-------------------------------------------------------------------------------------------------------|----------------------------------------------------------------------------------------------------------------------|
| Mariaux, Jean<br>Professor, Curator<br>Natural History Museum of Geneva<br>Switzerland                                                            | Maricato, Guilherme<br>Master student<br>Unirio<br>Brazil                                             | Mariette, Stéphanie<br>Researcher<br>INRA<br>France                                                                  |
| Marigomez, Ionan<br>Prof Cell Biology & Dtor Plentzia Marine Station (PIE-UPV/EHU)<br>University of the Basque Country (UPV/EHU)<br>Spain         | Marin, Isabel<br>PhD Marine Sciences<br>Spain                                                         | Marín Samper, Laura<br>Researcher<br>Hawaii Pacific University<br>United States of America (the)                     |
| Marine, Robuchon<br>Postdoc in conservation biology<br>France                                                                                     | Marin-Guirao, Lazaro<br>Postdoc Marine Ecology<br>Stazione Zoologica Anton Dohrn<br>Italy             | Marinho, Manoela<br>Post doc researcher<br>Museu de Zoologia da Universidade de São Paulo, MZUSP<br>Brazil           |
| Marinho, Marcia Mara<br>Lecturer<br>Universidade Federal da Bahia<br>Brazil                                                                       | Marinho-Filho, Jader<br>Professor of Zoology<br>University of Brasília<br>Brazil                      | Marini-Filho, Onildo J<br>Environmental Analyst<br>Instituto Chico Mendes de Conservação da Biodiversidade<br>Brazil |
| Marin-Menendez, Alejandro<br>Postdoctoral Fellow<br>Wellcome Trust-Sanger Institute<br>United Kingdom of Great Britain and Northern Ireland (the) | Marino-Tapia, Ismael *<br>Coastal Oceanography<br>CINVESTAV- Merida<br>Mexico                         | Marinova, Gabriela<br>Food technologies<br>Institute of Cryobiology and Food Technologies<br>Bulgaria                |
| Marinova, prof. PhD Gabriela<br>Food technologies<br>Institute of Cryobiology and Food Technologies - Director<br>Bulgaria                        | Marion, Jeffrey<br>Research Biologist<br>U.S. Geological Survey<br>United States of America (the)     | Marjakangas, Emma-Liina<br>PhD candidate<br>Norwegian University of Science and Technology<br>Norway                 |
| Marjamaki, Paula<br>PhD Student<br>University of Exeter<br>United Kingdom of Great Britain and Northern Ireland (the)                             | Mark, Waters<br>Senior Lecturer, Genetics<br>The University of Western Australia<br>Australia         | Mark, FRSNZ, Sir Alan<br>Emeritus Professor<br>University of Otago<br>New Zealand                                    |
| Markesteijn, Lars<br>Lecturer in Forest Sciences<br>Bangor University<br>United Kingdom of Great Britain and Northern Ireland (the)               | Markham, Katherine<br>PhD Student/Ecology<br>Boise State University<br>United States of America (the) | Markle, Douglas<br>Professor Emeritus<br>Oregon State University<br>United States of America (the)                   |

|                                                                                                                                                            |                                                                                                                                          |                                                                                                                       |
|------------------------------------------------------------------------------------------------------------------------------------------------------------|------------------------------------------------------------------------------------------------------------------------------------------|-----------------------------------------------------------------------------------------------------------------------|
| Marklein, Alison<br>Postdoctoral Scholar, Ecology<br>University of California, Berkeley<br>United States of America (the)                                  | Marklund, Maria<br>Researcher, Freshwater science<br>Australia                                                                           | Markman, Shai<br>Senior Lecturer<br>University of Haifa - Oranim<br>Israel                                            |
| Markou, Christopher<br>PhD Candidate/Lecturer<br>The University of Cambridge, Faculty of Law<br>United Kingdom of Great Britain and Northern Ireland (the) | Marler, Thomas<br>Professor Terrestrial Ecology<br>University of Guam<br>Guam                                                            | Marlew, Joseph<br>United Kingdom of Great Britain and Northern Ireland (the)                                          |
| Marley, Nigel<br>Postdoc Researcher, Meiofauna/Tardigrada<br>University of Plymouth<br>United Kingdom of Great Britain and Northern Ireland (the)          | Marmontel, Miriam<br>Wildlife researcher<br>Instituto de Desenvolvimento Sustentável Mamirauá<br>Brazil                                  | Marnell, Ferdia<br>Zoologist<br>National Parks & Wildlife Service<br>Ireland                                          |
| Marneweck, Courtney<br>Dr / Chemical Ecology<br>South Africa                                                                                               | Marneweck, David<br>Carnivore Conservationist<br>Endangered Wildlife Trust<br>South Africa                                               | Maron, Martine<br>Associate Professor of Environmental Management<br>The University of Queensland<br>Australia        |
| Marone, Eduardo<br>Full Professor - Physical Oceanography<br>Center for Marine Studies - Federal University of Parana<br>Brazil                            | Marozava, Sviatlana<br>Postdoctoral researcher, microbiologist<br>Institute of Groundwater Ecology, Helmholtz Zentrum München<br>Germany | Marquard, Helen<br>Sustainable development<br>INSPIRE<br>United Kingdom of Great Britain and Northern Ireland (the)   |
| MARQUER, Didier<br>Professor<br>UMR Chrono-environnement, Université de Franche Comté<br>France                                                            | Marques, Ana Teresa<br>Biology<br>University of Lisbon<br>Portugal                                                                       | Marques, Antonio C<br>Professor<br>Universidade de São Paulo<br>Brazil                                                |
| Marques, Caio<br>Biologist / PhD Candidate<br>Universidade Estadual de Santa Cruz (UESC)<br>Brazil                                                         | Marques, Isabel<br>postdoctoral Marie Curie Fellow/ Botany<br>University of Lisbon<br>Portugal                                           | Marques, J. Tiago<br>Ecologist and Post-doc Researcher<br>Departamento de Biologia, Universidade de Évora<br>Portugal |
| MARQUES, JURACY *<br>PROFESSOR<br>UNEB<br>Brazil                                                                                                           | Marques, Luiz<br>Associate Professor History and Environmental Studies<br>State University of Campinas (Brazil)<br>Brazil                | Marques, Marcia<br>Professor of Ecology and Environmental Sciences<br>Federal University of Paraná<br>Brazil          |
| Marques, Maria Jose<br>Senior researcher. Land and Soil Conservation<br>Universidad Autonoma Madrid<br>Spain                                               | Marques, Otávio<br>PhD candidate<br>Instituto de Botânica<br>Brazil                                                                      | Marques, Renato<br>Professor of Forest biogeochemistry<br>Universidade Federal do Paraná<br>Brazil                    |

|                                                                                                                               |                                                                                                                                |                                                                                                                                       |
|-------------------------------------------------------------------------------------------------------------------------------|--------------------------------------------------------------------------------------------------------------------------------|---------------------------------------------------------------------------------------------------------------------------------------|
| Marques, Thiago Simon<br>Professor<br>Núcleo de Estudos Ambientais (NEAS) da Universidade de Sorocaba (UNISO)<br>Brazil       | Marques, Tiago<br>Senior Research Fellow, Ecological Statistics<br>University of St Andrews<br>Portugal                        | Marques Telles, Monica<br>Lecturer / Pathology<br>Universidade Federal de São Paulo<br>Brazil                                         |
| Marquet, Pablo<br>Professor of Ecology<br>Pontificia Universidad Católica de Chile<br>Chile                                   | Marquete, Ronaldo<br>Pesquisador<br>Instituto Brasileiro de Geografia e Estatística<br>Brazil                                  | Marquez, Ana Citlali<br>PhD Candidate Immunology<br>University of British Columbia<br>Canada                                          |
| Marquez, Javier<br>Doctor in Biology<br>Universidad Nacional de Rio Cuarto<br>Argentina                                       | Márquez, viviana<br>Biology<br>Universidade Federal da Paraíba<br>Brazil                                                       | MARQUEZ HERNANDEZ, LAURA<br>CHEMICAL ENGINEERING PHD CANDIDATE<br>UNIVERSITY OF ARIZONA<br>United States of America (the)             |
| Marquínez, Jorge<br>Head of Natural Resources and Territorial Planning<br>Institute<br>INDUROT, University of Oviedo<br>Spain | Marr, Jonathan<br>Senior Lecturer of Physics and Astronomy<br>Union College<br>United States of America (the)                  | Marra, Francesco<br>Hebrew University of Jerusalem<br>Israel                                                                          |
| Marras, Stelio<br>Professor de antropologia<br>Instituto de Estudos Brasileiros - Universidade de São Paulo<br>Brazil         | MARRUGAL, ANGELA<br>phD student<br>Instituto de investigación Hospital 12 de Octubre / CNIO<br>Spain                           | Marschalek, Daniel<br>United States of America (the)                                                                                  |
| Marsden, Claire<br>Associate professor in soil ecology<br>Montpellier SupAgro<br>France                                       | Marsden, Ross<br>Meteorology<br>Meteorological Service of New Zealand Ltd.<br>New Zealand                                      | Marsh, Charles<br>Postdoc in tropical ecology<br>University of Oxford<br>United Kingdom of Great Britain and Northern Ireland (the)   |
| Marsh, Kate<br>Advanced Accredited Practising Dietitian<br>Private Practice<br>Australia                                      | Marshal, Jason<br>Professor of Ecology<br>University of the Witwatersrand<br>South Africa                                      | Marshall, Harry<br>Postdoctoral Research Fellow<br>University of Exeter<br>United Kingdom of Great Britain and Northern Ireland (the) |
| Marshall, John<br>Mathematics, microclimatology<br>Retired<br>United Kingdom of Great Britain and Northern Ireland (the)      | Marshall, Justin<br>ARC Laureate Research Fellow / Marine Neuroscience and CoralWatch<br>University of Queensland<br>Australia | Marshall, Leesia<br>Assistant Professor<br>Louisiana State University Alexandria<br>United States of America (the)                    |

|                                                                                                                                                                   |                                                                                                                                                                                      |                                                                                                                          |
|-------------------------------------------------------------------------------------------------------------------------------------------------------------------|--------------------------------------------------------------------------------------------------------------------------------------------------------------------------------------|--------------------------------------------------------------------------------------------------------------------------|
| Marshall, Leon<br>PhD Candidate<br>University of Namur<br>Belgium                                                                                                 | Marsh-Matthews, Edie<br>Professor Emerita<br>University of Oklahoma<br>United States of America (the)                                                                                | Marsola Giroti, André<br>PhD student - Zoology Department<br>USP - Universidade de São Paulo<br>Brazil                   |
| Marson, Izabel<br>Instituto de Filosofia e Ciências Humanas<br>Universidade Estadual de Campinas - UNICAMP<br>Brazil                                              | Marston, Richard<br>University Distinguished Professor Emeritus of Geography<br>Kansas State University<br>United States of America (the)                                            | Marte, Clarissa<br>Aquaculture, biology<br>Philippines (the)                                                             |
| Martel, An<br>Prof.<br>Ghent University, Faculty of Veterinary Medicine, Wildlife<br>Health Ghent<br>Belgium                                                      | Martel Quintana, Antera<br>Curator BEA culture collection of microalgae. Scientific<br>director.<br>Spanish Bank of Algae (BEA) University of Las Palmas de<br>Gran Canaria<br>Spain | Martello, Mariana<br>Marine Biologist and Master student of Ecology<br>UFPR- Federal University of Parana<br>Brazil      |
| Martens, Carola<br>PhD candidate in Physical Geography<br>Goethe University Frankfurt<br>Germany                                                                  | Martens, Koen<br>Head of Research<br>Royal Belgian Institute of natural Sciences<br>Belgium                                                                                          | Martensen, Alexandre<br>Post-doc Ecology<br>GCBEv - INPA<br>Brazil                                                       |
| Marthews, Toby<br>Research Associate in Land Surface Modelling<br>Centre for Ecology & Hydrology<br>United Kingdom of Great Britain and Northern Ireland<br>(the) | Martí, Eugènia<br>Permanent Staff Researcher<br>CSIC (Spanish National Research Council)<br>Spain                                                                                    | Martí Roca, Eugènia<br>Permanent Staff Researcher/Stream ecology and<br>biogeochemistry<br>CEAB-CSIC<br>Spain            |
| Martí Vázquez, Laura<br>Biologist<br>Spain                                                                                                                        | Martí-Lluch, Ruth<br>Spain                                                                                                                                                           | Martin, Daniel<br>Scientific Researcher / Marine Biologist<br>Centre d'Estudis Avançats de Blanes (CEAB - CSIC)<br>Spain |
| Martin, Dominic<br>Ecology<br>University of Goettingen<br>Germany                                                                                                 | Martin, François-Marie<br>Ph.D candidate<br>National Research Institute of Science and Technology for<br>Environment and Agriculture<br>France                                       | Martin, Gaetan<br>Phd student fresh water microbial ecology<br>SLU, Uppsala<br>Sweden                                    |
| Martin, Gerardo<br>Infectious disease ecology<br>James Cook University<br>Australia                                                                               | Martin, Guillaume<br>Researcher in population biology<br>CNRS<br>France                                                                                                              | Martin, Jean-Louis<br>Senior Scientist<br>CNRS<br>France                                                                 |
| Martin, Jez<br>Ecologist<br>United Kingdom of Great Britain and Northern Ireland<br>(the)                                                                         | Martin, Joel<br>Associate Vice President for Research & Collections<br>Natural History Museum of Los Angeles County<br>United States of America (the)                                | Martin, John<br>Ecologist<br>Royal Botanic Garden Sydney<br>Australia                                                    |



|                                                                                                                                                                |                                                                                                                                    |                                                                                                                                         |
|----------------------------------------------------------------------------------------------------------------------------------------------------------------|------------------------------------------------------------------------------------------------------------------------------------|-----------------------------------------------------------------------------------------------------------------------------------------|
| Martin, Julien<br>Lecturer<br>University of Aberdeen<br>United Kingdom of Great Britain and Northern Ireland (the)                                             | Martin, Maria<br>Scientist<br>EMBL-European Bioinformatics Institute<br>United Kingdom of Great Britain and Northern Ireland (the) | Martin, Marie Caroline<br>Professor<br>France                                                                                           |
| Martin, Meghan<br>Conservation Biologist<br>San Diego Zoo<br>United States of America (the)                                                                    | Martin, Nancy<br>PhD Chemistry<br>Universidad Autónoma Metropolitana Iztapalapa<br>Mexico                                          | Martin, Rachel<br>Research Scientist (MSc). Conservation Science - Volunteer.<br>RMIT University<br>Australia                           |
| Martin, Ryan<br>Assistant Professor of Biology<br>Case Western Reserve University<br>United States of America (the)                                            | Martin, Tara<br>Conservation Scientist<br>University of British Columbia<br>Canada                                                 | Martin, Thomas<br>Associate Professor of Aquatic Ecology<br>Western Carolina University<br>United States of America (the)               |
| Martin, Welinga *<br>Environmental Health Specialist<br>The Eldoret National Polytechnic<br>Kenya                                                              | Martín, Lucas<br>Researcher Phycology<br>Argentina                                                                                 | Martin Duran, Andres Manuel<br>Profesor de Universidad<br>Unam<br>Spain                                                                 |
| Martin Herranz, Daniel Elias<br>PhD in Biological Sciences<br>EMBL-EBI / University of Cambridge<br>United Kingdom of Great Britain and Northern Ireland (the) | Martín Herrero, Nuria<br>Agricultural technical engineer<br>Autonomous Worker<br>Spain                                             | Martín R., Alvarez<br>Professor and Curator (mammalogy)<br>Universidade Estadual de Santa Cruz (UESC)<br>Brazil                         |
| Martina, Claudia<br>PhD Candidate<br>University College London<br>Mexico                                                                                       | MARTINA, ESTEBAN<br>CONSULTANT, PHYSICS<br>Mexico                                                                                  | Martin-Alciati, Mario<br>Research Associate<br>National Research Program, U.S. Geological Survey<br>United States of America (the)      |
| Martín-Esquinas, Alexandra<br>PhD Student in Agricultural Chemistry<br>Universidad Autónoma de Madrid<br>Spain                                                 | Martinez, David R.<br>Professor of Ecology<br>Universidad de Los Lagos<br>Chile                                                    | MARTINEZ, Flor<br>Associate Professor in Plant Biology<br>Universidad Autónoma de Madrid<br>Spain                                       |
| Martinez, Iciar<br>Professor, Seafood Safety<br>Ikerbasque & University of the Basque Country<br>Spain                                                         | Martinez, Jean-Jacques Itzhak<br>Senior Lecturer in Entomology<br>Tel Hai College<br>Israel                                        | Martinez, Maite<br>Universty professor and researcher. Animal physiology and Ecotoxicology<br>University of the Basque Country<br>Spain |
| Martinez, Pablo Ariel *<br>Professor<br>Universidade Federal de Sergipe<br>Brazil                                                                              | Martinez, Stephanie<br>Bachelor in Biology<br>Simon Bolivar University<br>Venezuela (Bolivarian Republic of)                       | Martínez, Brezo<br>Associate Professor<br>Universidad Rey Juan Carlos<br>Spain                                                          |

|                                                                                                                         |                                                                                                                                               |                                                                                                                                                                      |
|-------------------------------------------------------------------------------------------------------------------------|-----------------------------------------------------------------------------------------------------------------------------------------------|----------------------------------------------------------------------------------------------------------------------------------------------------------------------|
| Martínez, Carlos<br>PhD Student<br>University of Jaén<br>Spain                                                          | Martínez, Carlos<br>Professor, Systems Ecology, Vertebrate Zoology<br>Departamento de Biología, Universidade Federal do<br>Maranhão<br>Brazil | Martínez, Fernando<br>Doctorate student/ insect ecology<br>Instituto Patagónico para el Estudio de los Ecosistemas<br>Continetales (CCT CONICET-CENPAT)<br>Argentina |
| Martínez, Katherine<br>PhD Student in Ecology<br>Pontificia Universidad Católica de Chile<br>Chile                      | Martínez, Nicolás<br>Biologist<br>Museo Nacional de Historia Natural del Paraguay<br>Paraguay                                                 | Martínez, Pablo A.<br>Biologist<br>Universidad Nacional de Mar del Plata<br>Argentina                                                                                |
| Martínez, Raúl<br>Instituto de Ecología UNAM<br>Mexico                                                                  | Martinez Estevez, Lourdes<br>PhD student<br>University of California Santa Cruz<br>United States of America (the)                             | Martinez Granero, Maria Magdalena<br>lawyer<br>Spain                                                                                                                 |
| Martínez Hernández, Fabián<br>Postdoctoral Researcher<br>University of Almería<br>Spain                                 | Martínez Muñoz, Carlos Alberto<br>Biologist<br>Universität Greifswald, Germany<br>Cuba                                                        | Martínez Ortí, Alberto<br>Biologist<br>Museo Valenciano de Historia Natural<br>Spain                                                                                 |
| Martinez Pardo, Julia<br>PhD Student in Biological Sciencie<br>Instituto de Biología Subteopical-CONICET<br>Argentina   | Martínez Rivas, Félix Juan<br>PhD Student, plant biotechnology<br>University of Córdoba<br>Spain                                              | Martínez Romero, Eva<br>Biology<br>Spain                                                                                                                             |
| Martínez Santalla, Sara<br>Biology graduated, Phd and master student<br>Universidade de Santiago de Compostela<br>Spain | Martínez Sarabia, Paulina<br>Marine Ecology<br>Universidad Autónoma de Baja California Sur<br>Mexico                                          | Martinez Torregrosa, Joaquín<br>Professor of Science Education<br>University oficina Alicante<br>Spain                                                               |
| Martinez Varela, Alicia<br>Phd candidate<br>Institute of Environmental Assesment and Water<br>Research, CSIC<br>Spain   | Martinez Vergara, Hernando<br>Postdoctorate in nervous system evolution<br>EMBL<br>Spain                                                      | Martínez-Abaigar, Javier<br>Professor of Botany<br>Universidad de La Rioja<br>Spain                                                                                  |
| Martinez-Agüero, Maria<br>Principal professor / biologist<br>Universidad del Rosario<br>Colombia                        | Martinez-Alonso, Celia<br>Reseracher<br>CETEMAS<br>Spain                                                                                      | Martínez-Álvarez, Pablo *<br>Researcher<br>Sustainable Forest Management Research Institute<br>(University of Valladolid - INIA)<br>Spain                            |
| Martinez-Anaya, Claudia<br>Researcher<br>Universidad Nacional Autonoma de Mexico<br>Mexico                              | MARTINEZ-ASENSIO, ADRIAN<br>Postdoctoral researcher<br>LIENSs - CNRS/Université de La Rochelle<br>France                                      | Martinez-Cruz, Begoña<br>Postdoctoral Researcher<br>Spain                                                                                                            |

|                                                                                                                                                                                                              |                                                                                                                                           |                                                                                                                                                                    |
|--------------------------------------------------------------------------------------------------------------------------------------------------------------------------------------------------------------|-------------------------------------------------------------------------------------------------------------------------------------------|--------------------------------------------------------------------------------------------------------------------------------------------------------------------|
| Martínez-Eixarch, Maite<br>Agroecologist<br>IRTA<br>Spain                                                                                                                                                    | Martinez-Escauriaza, Roi<br>Doctorate Marine Biology<br>OOM<br>Spain                                                                      | Martinez-Fernandez, Julia<br>Ecologist<br>New Water Culture Foundation<br>Spain                                                                                    |
| Martínez-Fernández, Vanesa<br>PHD Candidate Forestry Advanced Research<br>Universidad Politécnica de Madrid<br>Spain                                                                                         | Martínez-García, Felipe<br>Teacher<br>Polytechnic University of Madrid<br>Spain                                                           | Martínez-Gordillo, Martha<br>Biologist/Botany<br>National University of Mexico (UNAM)<br>Mexico                                                                    |
| Martínez-Guijosa, Jordi<br>PhD Student in Wildlife Management and Epidemiology<br>Instituto de Investigación en Recursos Cinegéticos IREC<br>(UCLM-CSIC-JCCM)<br>Spain                                       | MARTINEZ-HABIBE, MARIA CRISTINA<br>Profesora Asociada<br>Instituto de Ciencias Naturales, Universidad Nacional de<br>Colombia<br>Colombia | Martinez-Harms, María Jose<br>Post-doctoral researcher, ecology department<br>Pontificia Universidad Católica de Chile<br>Chile                                    |
| Martínez-Lanfranco, Juan Andrés<br>Investigador Asociado<br>Grupo Biodiversidad y Ecología de la Conservación (BEC),<br>Facultad de Ciencias, Universidad de la República<br>Oriental del Uruguay<br>Uruguay | Martínez-López, Javier<br>Postdoctoral researcher<br>BC3-Basque Centre for Climate Change<br>Spain                                        | Martinez-Luis, Sergio<br>Researcher<br>INDICASAT-AIP<br>Panama                                                                                                     |
| Martínez-Meyer, Enrique<br>Professor Ecology<br>Universidad Nacional Autonoma de Mexico<br>Mexico                                                                                                            | Martinez-Ortega, M. Montserrat<br>Prof. Dr. Botany<br>University of Salamanca<br>Spain                                                    | Martínez-Ramos, Miguel<br>Full Professor<br>Instituto de Investigaciones en Ecosistemas y<br>Sustentabilidad, Universidad Nacional Autónoma de<br>México<br>Mexico |
| Martinez-Rangel, Sayuri G. *<br>Ecology<br>Universidad Autónoma de Baja California<br>Mexico                                                                                                                 | MARTÍNEZ-SÁNCHEZ, JUAN JOSÉ<br>FULL PROFESSOR<br>TECHNICAL UNIVERSITY OF CARTAGENA<br>Spain                                               | Martínez-Taberner, Antoni<br>Professor<br>University of Balearic Islands<br>Spain                                                                                  |
| Martínez-Vilalta, Jordi<br>Researcher and Lecturer, Ecology<br>CREAF, Univ. Autònoma Barcelona<br>Spain                                                                                                      | Martinez-Yrizar, Angelina<br>Researcher<br>Instituto de Ecology, Universidad Nacional Autonoma de<br>Mexico<br>Mexico                     | Martinou, Angeliki F<br>Head Entomologist/Vector Ecologist<br>Joint Services Health Unit Cyprus<br>Cyprus                                                          |
| Martinovic, Vesna<br>Senior Research Associate<br>Institut for Biological Research „dr Sinisa Stankovic"<br>Serbia                                                                                           | MARTIN-PREVEL, Yves<br>Head of the Health & Societies Scientific Department<br>IRD<br>France                                              | Martín-Robles, Nieves<br>phd student<br>Universidad Rey Juan Carlos<br>Spain                                                                                       |

|                                                                                                                                                                          |                                                                                                                                                  |                                                                                                                                                     |
|--------------------------------------------------------------------------------------------------------------------------------------------------------------------------|--------------------------------------------------------------------------------------------------------------------------------------------------|-----------------------------------------------------------------------------------------------------------------------------------------------------|
| Martins, Catarina<br>PhD Student<br>Justus Liebig University Giessen<br>Germany                                                                                          | Martins, Dino<br>Entomology, Evolutionary Biology<br>Mpala Research Centre<br>Kenya                                                              | martins, ezequiel *<br>geology<br>Brazil                                                                                                            |
| Martins, Felipe<br>Genomics<br>Australian National University<br>Australia                                                                                               | Martins, Gustavo<br>Researcher<br>University of Azores<br>Portugal                                                                               | Martins, Ivan M.<br>PhD candidate<br>Oceanographic Institute, University of São Paulo<br>Brazil                                                     |
| Martins, MarluCIA<br>Researcher conservation biology<br>Museu Paraense Emilio Goeldi<br>Brazil                                                                           | Martins, Renato<br>Postdoctoral Researcher<br>Universidade Federal de Goiás - UFG<br>Brazil                                                      | Martins, Thais<br>Lecturer in Zoology and Conservation<br>Cornwall College Newquay<br>United Kingdom of Great Britain and Northern Ireland<br>(the) |
| Martín-Sosa Rodríguez, Pablo<br>Marine Ecology and Fisheries Researcher<br>Spanish Institute of Oceanography<br>Spain                                                    | Martins-Silva, Jimi<br>PhD Student<br>Universidade do Estado do Rio de Janeiro -UERJ<br>Brazil                                                   | Martín-Vivaldi, Manuel<br>Associate Professor, Zoology<br>Universidad de Granada<br>Spain                                                           |
| Martius, Christopher<br>Team Leader - Climate Change, Bioenergy, and Low-<br>Carbon Development (CCE)<br>Center for International Forestry Research (CIFOR)<br>Indonesia | Martoni, Francesco<br>PhD student<br>Lincoln University<br>New Zealand                                                                           | Martorell, Carlos<br>Professor<br>Universidad Nacional Autónoma de México<br>Mexico                                                                 |
| Marty, Micah<br>Research Scientist<br>University of North Carolina Wilmington<br>United States of America (the)                                                          | Martyka, Rafal<br>Assistant professor<br>Institute of Nature Conservation, Polish Academy of<br>Sciences<br>Poland                               | Marufu, Tamuona<br>Graduate in Fisheries and Aquatic Sciences<br>University Of Namibia<br>Namibia                                                   |
| Marulanda Gómez, Angela Maria<br>Biologist<br>Pontificia Universidad Javeriana Cali<br>Colombia                                                                          | Marulanda Gómez, Jorge Hernán<br>Jefe Departamento de Gestión Ambiental<br>E.pfesa de Acueducto y Alcantarillado de Pereira S.A. ESP<br>Colombia | Maruyama, Pietro<br>Postdoctoral researcher<br>Plant Biology Department, University of Campinas<br>Brazil                                           |
| Marx, Laura<br>Forest Ecologist<br>United States of America (the)                                                                                                        | MARY, Bruno<br>Researcher<br>INRA<br>France                                                                                                      | MARY, Nathalie *<br>Aquatic biologist<br>ETHYCO<br>New Caledonia                                                                                    |
| Marzec, Magdalena<br>zoologist, ecologist<br>Poland                                                                                                                      | Marzloff, Martin<br>Research scientist / marine ecosystem modelling<br>Ifremer<br>France                                                         | Marzluff, John<br>Professor of Wildlife Science<br>University of Washington<br>United States of America (the)                                       |

|                                                                                                                                             |                                                                                                                                                          |                                                                                                                                                  |
|---------------------------------------------------------------------------------------------------------------------------------------------|----------------------------------------------------------------------------------------------------------------------------------------------------------|--------------------------------------------------------------------------------------------------------------------------------------------------|
| Mascalzoni, Deborah<br>Senior scientist<br>Uppsala University<br>Sweden                                                                     | Mascarenhas, André<br>Researcher<br>Humboldt-Universitaet zu Berlin<br>Germany                                                                           | Masciadri Bálsamo, Silvana<br>Professor /Environmental managment and sustainability<br>CETP-UTU<br>Uruguay                                       |
| Mascovich, Katie<br>Graduate Student, Ecology<br>University of Georgia<br>United States of America (the)                                    | Masello, Juan<br>Principal Investigator<br>Department of Animal Ecology & Systematics, Justus-Liebig Universität Gießen<br>Germany                       | Masese, FRank<br>Lecturer<br>Department of Fisheries and Aquatic Sciences, University of Eldoret<br>Kenya                                        |
| Mason, Gareth<br>Forest Ecologist<br>University of the Highlands and Islands<br>United Kingdom of Great Britain and Northern Ireland (the)  | Mason, Kate<br>PhD student, Epidemiology<br>London School of Hygiene and Tropical Medicine<br>United Kingdom of Great Britain and Northern Ireland (the) | Mason, Kelly<br>Researcher in Biogeochemistry<br>United Kingdom of Great Britain and Northern Ireland (the)                                      |
| Mason, Lucy<br>Conservation Scientist<br>RSPB Centre for Conservation Science<br>United Kingdom of Great Britain and Northern Ireland (the) | Mason, Sherry A.<br>Fish biologist<br>California Department of Fish And Wildlife<br>United States of America (the)                                       | Mason, Tate<br>Director of the World Center for Birds of Prey<br>The Peregrine Fund<br>United States of America (the)                            |
| Mason, Tom<br>Post-doctoral Researcher<br>Durham University<br>United Kingdom of Great Britain and Northern Ireland (the)                   | Maspoli, Guido<br>Biologist<br>Indipendent<br>Switzerland                                                                                                | Massabò, Dario<br>Researcher/Environmental Sciences<br>University of Genoa<br>Italy                                                              |
| Massabuau, Jean-Charles<br>Research Director<br>Centre National de la Recherche Scientifique & Université de Bordeaux<br>France             | Massad, Raia Silvia<br>Researcher<br>Institut National de Recherche Agronomique<br>France                                                                | Massaguer, Leonardo<br>Msc. Mechanical Engineer<br>KIT - Karlsruhe Institute of Technology and Unicamp - State University of Campinas<br>Germany |
| Massaine Moulatlet, Gabriel<br>PhD candidate<br>University of Turku<br>Finland                                                              | Massaloux, Damien *<br>Agroecological engineer<br>ISARA-Lyon<br>France                                                                                   | Massaro, Melanie<br>Senior Lecturer in Ecology and Ornithology<br>Charles Sturt University<br>Australia                                          |
| Massensini Júnior, Antônio<br>Herbarium Manager<br>Universidade Federal de Lavras<br>Brazil                                                 | Masseret, Estelle<br>associate professor<br>University of Montpellier<br>France                                                                          | Massimino, Dario<br>Research Ecologist<br>British Trust for Ornithology<br>United Kingdom of Great Britain and Northern Ireland (the)            |

|                                                                                                                          |                                                                                                                               |                                                                                                                                          |
|--------------------------------------------------------------------------------------------------------------------------|-------------------------------------------------------------------------------------------------------------------------------|------------------------------------------------------------------------------------------------------------------------------------------|
| Masson-Delmotte, Valerie<br>senior climate scientist<br>Université Paris Saclay, IPSL, LSCE, CEA Saclay<br>France        | Massutí, Enric<br>Research Professor on Fisheries<br>Instituto Español de Oceanografía<br>Spain                               | Mastromonaco, Gabriela<br>Reproductive Physiologist<br>Toronto Zoo<br>Canada                                                             |
| Mata, Joao<br>Associate Professor - Geochemisry<br>Faculdade de Ciências, Universidade de Lisboa<br>Portugal             | Mataloni, Gabriela<br>Biology Professor and Lead Researcher<br>National University of General San Martín (UNSAM)<br>Argentina | Matatiken, Eddy Denis *<br>Environmentalist<br>Ministry of Environment, Energy and Climate Change<br>Seychelles                          |
| Matee, Lusanda Patrick<br>Ecologist<br>University of KwaZulu-Natal<br>South Africa                                       | Mateo, Rafael<br>Professor / Ecotoxicology<br>Univerisity of Castilla-La Mancha<br>Spain                                      | MATEOS-GONZALEZ, FERNANDO<br>PhD Animal Behaviour<br>Spain                                                                               |
| Mateo-Vega, Javier<br>Research Fellow<br>Smithsonian Tropical Research Institute<br>Costa Rica                           | Mateus, Andre<br>Postdoctoral Researcher<br>European Molecular Biology Laboratory<br>Germany                                  | Mateus, Octávio<br>Professor. Paleontology<br>Universidade Nova de Lisboa<br>Portugal                                                    |
| Mateus, Simão<br>Paleontologist<br>Museu da Lourinhã<br>Portugal                                                         | Mathé-Hubert, Hugo<br>PostDoc evolution / ecology<br>ETH - Eawag<br>Switzerland                                               | Mathews, Antony<br>Associate Professor and Head, Department of<br>Mathematics<br>St Berchmans College, Changanacherry, Kerala<br>India   |
| Mathews, Christopher<br>Professor Emeritus, Biochemistry<br>Oregon State University<br>United States of America (the)    | Matias, Catherine<br>Senior Researcher in Statistics<br>CNRS - Université Pierre & marie Curie<br>France                      | Matias, Denise Margaret S.<br>Center for Development Research (ZEF) Bonn, The<br>German Development Institute (DIE)<br>Philippines (the) |
| Matias, Luis<br>Research Scientist, Ecologist<br>Spanish Research Council (CSIC)<br>Spain                                | Matias Reis, Simone<br>PhD Student<br>Universidade do Estado do Mato Grosso<br>Brazil                                         | Matilde, Estrela<br>Conservation Program Manager<br>Fundação Príncipe Trust<br>Sao Tome and Principe                                     |
| Matos, Dalva<br>Full time professor / Ecology and Environmental Sciences<br>Universidade Federal de São Carlos<br>Brazil | Matos Pupo, Felipe<br>Researcher and Professor<br>Centro de Investigaciones de Ecosistemas Costeros<br>Cuba                   | Matson, Kevin<br>Assistant Professor, Resource Ecology Group<br>Wageningen University<br>Netherlands (the)                               |
| Matsuda Goodwin, Reiko<br>Big logic cal Anthropologist<br>Fordham University<br>United States of America (the)           | Matsushita, Yasuo<br>Professor Emeritus<br>Osaka City University Advanced Mathematical Institute<br>Japan                     | Matsuura, Keiichi<br>Curator Emeritus<br>National Museum of Nature and Science<br>Japan                                                  |

|                                                                                                                                                          |                                                                                                                            |                                                                                                                                             |
|----------------------------------------------------------------------------------------------------------------------------------------------------------|----------------------------------------------------------------------------------------------------------------------------|---------------------------------------------------------------------------------------------------------------------------------------------|
| Mattei, Simone<br>Germany                                                                                                                                | Mattera, Lorenzo<br>Professor, Solid State Physics<br>Università di Genova<br>Italy                                        | Mattern, David *<br>Sr. Environmental Consultant<br>Parametrix<br>United States of America (the)                                            |
| Matteuzzo, Marcela Camargo<br>Teacher/researcher biology/ecology<br>Instituto Federal de Minas Gerais<br>Brazil                                          | Matthews, Alex<br>Biological Consultant<br>United Kingdom of Great Britain and Northern Ireland<br>(the)                   | Matthews, Thalassa<br>Palaeontologist<br>Iziko Museums of South Africa<br>South Africa                                                      |
| Matthews, Ty<br>Senior Lecturer (Aquatic Ecology)<br>Deakin University<br>Australia                                                                      | Matthews, William J.<br>Professor Emeritus (Biology)<br>University of Oklahoma<br>United States of America (the)           | Matthysen, Erik<br>Full Professor<br>University of Antwerp<br>Belgium                                                                       |
| Mattingly, Hayden<br>Director and Professor of Environmental Studies<br>Tennessee Tech University<br>United States of America (the)                      | Mattison, Elizabeth<br>Ecology<br>United Kingdom of Great Britain and Northern Ireland<br>(the)                            | Mattos, Kaitlin<br>Environmental Science/Engineering<br>University of Colorado<br>Northern Mariana Islands (the)                            |
| Mattos, Sérgio Henrique Vannucchi Leme de<br>Professor<br>Universidade Federal de São Carlos<br>Brazil                                                   | Mattson, Sean<br>Science writer and photographer<br>Smithsonian Tropical Research Institute<br>Panama                      | Mattson, William<br>Emeritus Insect Ecologist, retired<br>USDA Forest Service<br>United States of America (the)                             |
| Matule, Baiba<br>Latvia                                                                                                                                  | Matz, Mikhail<br>Associate professor, Biology<br>University of Texas at Austin<br>United States of America (the)           | Mauffret, Aourell<br>Ecotoxicologist<br>Ifremer<br>France                                                                                   |
| Maurel, Noëlie<br>Postdoctoral research associate in Ecology<br>University of Konstanz<br>Germany                                                        | Maurer, Golo<br>KBA Program Manager<br>BirdLife Australia<br>Australia                                                     | Maurie, Vanessa<br>Ecologist<br>Groupe de Recherche et d'Etude pour la Gestion de<br>l'Environnement (GREGE)<br>France                      |
| Mauritti, Rosário<br>Assistant Professor, Sociology<br>Universidade de Évora<br>Portugal                                                                 | Mauvisseau, Quentin<br>PhD student<br>University of Derby<br>United Kingdom of Great Britain and Northern Ireland<br>(the) | MAVRAKI, DIMITRA<br>ENVIRONMENTALIST<br>HELLENIC CENTRE FOR MARINE RESEARCH<br>Greece                                                       |
| Mavridis, Avraam<br>Lecturer of Agroenvironmental Management Systems/<br>GIS Analyst<br>Perrotis College, American Farm School of Thessaloniki<br>Greece | Maxime, Burst<br>Lecturer, Plant community ecology<br>Université de Lorraine<br>France                                     | Maxwell, Daniel<br>Postdoctoral Researcher (Physics)<br>Swansea University<br>United Kingdom of Great Britain and Northern Ireland<br>(the) |

|                                                                                                                                 |                                                                                                                                |                                                                                                                                                                                                                                                           |
|---------------------------------------------------------------------------------------------------------------------------------|--------------------------------------------------------------------------------------------------------------------------------|-----------------------------------------------------------------------------------------------------------------------------------------------------------------------------------------------------------------------------------------------------------|
| Maxwell, Jessica<br>Research Fellow<br>The James Hutton Institute<br>United Kingdom of Great Britain and Northern Ireland (the) | May, Christian Albrecht<br>Anatomy<br>TU Dresden<br>Germany                                                                    | May, Everette<br>Professor of Mathematics & Computer Science<br>Salisbury University<br>United States of America (the)                                                                                                                                    |
| May, Giacomo<br>Germany                                                                                                         | May, Peter<br>Resource Economist<br>Federal Rural University of Rio de Janeiro<br>Brazil                                       | Mayhew, Owen<br>Chemist<br>University of Plymouth<br>United Kingdom of Great Britain and Northern Ireland (the)                                                                                                                                           |
| Maynard, Erynn<br>PhD Candidate in Ecology<br>The Pennsylvania State University<br>United States of America (the)               | Mayol-Serra, Joan<br>Biologist, responsible for wildlife conservation in Balearic Is.<br>Balearic Regional Government<br>Spain | Mayor, Federico *<br>Professor of Biochemistry (1963-) Director of the Center of Molecular Biology "Severo Ochoa" of the Autonomous University of Madrid (1976-81); Director General of UNESCO (1987-1999)/<br>Foundation for a Culture of Peace<br>Spain |
| Mayoral, Maria J<br>Postdoctoral Researcher<br>Universidad Autonoma de Madrid<br>Spain                                          | Mayr, Antonia<br>PhD Student in Tropical Ecology<br>University of Würzburg<br>Germany                                          | Mayronne, Andrew<br>United States of America (the)                                                                                                                                                                                                        |
| Maza-Villalobos, Susana<br>Research<br>CONACYT<br>Mexico                                                                        | Mazimba, Ofentse<br>Chemistry<br>Botswana International University of Science and Technology<br>Botswana                       | Mazukatow, Jana<br>PhD student, plant and soil ecology<br>Freie Universität Berlin<br>Germany                                                                                                                                                             |
| Mazzamuto, Maria Vittoria<br>Wildlife Biologist<br>University of Insubria<br>Italy                                              | Mazzega, Pierre<br>Researcher - Environmental modelling<br>CNRS Centre National de la Recherche Scientifique<br>France         | Mazzeo, Isabela<br>Biologa<br>Universidade Paulista - UNIP<br>Brazil                                                                                                                                                                                      |
| Mazzeo, Steve<br>United States of America (the)                                                                                 | Mazzetti, Loredana<br>Physician Anaesthetist<br>University of Siena<br>Italy                                                   | Mazzettu, Loredana<br>Physician Anaesthetist<br>University of Siena<br>Italy                                                                                                                                                                              |
| Mazzoldi, Carlotta<br>Associate Professor, Marine Biology<br>Department of Biology, University of Padova<br>Italy               | Mazzoli, Claudio<br>Associate Professor<br>Department of Geosciences, Padova University<br>Italy                               | Mazzucconi, Silvia Ana<br>Researcher (Entomology) - University teaching<br>Facultad de Ciencias Exactas y Naturales - Universidad de Buenos Aires<br>Argentina                                                                                            |



|                                                                                                                            |                                                                                                                                                      |                                                                                                                                                    |
|----------------------------------------------------------------------------------------------------------------------------|------------------------------------------------------------------------------------------------------------------------------------------------------|----------------------------------------------------------------------------------------------------------------------------------------------------|
| MBONAYEM, LIBOUM *<br>ENGINEER OF FOREST AND WILDLIFE/MSC RESEARCH IN ENVIRONMENTAL MANAGEMENT<br>MONITORTRUST<br>Cameroon | Mc Arthur, Ellen<br>Research and Community Education Officer / Ecologist<br>Borsarmulu Park Management / Universiti Malaysia Sarawak<br>Malaysia     | Mc Guinness, Sarah<br>Zoology with conservation Masters student<br>Bangor university<br>United Kingdom of Great Britain and Northern Ireland (the) |
| Mc Pherson, Fred<br>University of Calif. Santa Cruz (Retired)<br>United States of America (the)                            | McArthur, Genevieve<br>Head of Department of Cognitive Science<br>Macquarie University<br>Australia                                                  | McCafferty, S. Shawn<br>Associate Professor<br>Wheaton College Massachusetts<br>United States of America (the)                                     |
| McCain, Christy<br>Associate Professor<br>University of Colorado Boulder<br>United States of America (the)                 | McCairns, R.J. Scott<br>Research Scientist<br>France                                                                                                 | McCallion, Laura<br>Graduate, Ecology<br>Australian Rivers Institute, Griffith University<br>Australia                                             |
| MCCallum, Hamish<br>Professor of Environmental Science<br>Griffith University<br>Australia                                 | McCann, Kevin<br>Professor Ecology<br>University of Guelph<br>Canada                                                                                 | McCarthy, Andrew<br>Team leader (Structural biology)<br>EMBL-Grenoble<br>France                                                                    |
| McCarthy, Brian<br>Professor of Ecology<br>Ohio University<br>United States of America (the)                               | McCarthy, Damien<br>PhD candidate<br>Macquarie University<br>Australia                                                                               | McCarthy, James<br>Skellig Foundation<br>Ireland                                                                                                   |
| McCarthy, Thomas<br>Executive Director - Snow Leopard Program<br>Panthera<br>United States of America (the)                | McCartney, Matthew<br>Principal Researcher<br>International Water Management Institute<br>United Kingdom of Great Britain and Northern Ireland (the) | McCauley, Douglas<br>Assistant Professor<br>UCSB<br>United States of America (the)                                                                 |
| McCleary, Ryan<br>Visiting Assistant Professor<br>Stetson University<br>United States of America (the)                     | McClees, Whitney<br>Research Fellow<br>Smithsonian Environmental Research Center<br>United States of America (the)                                   | McClellan, Catherine<br>Marine Ecology Consultant<br>ONG Manga<br>United States of America (the)                                                   |
| McClenaghan, Beverly<br>Graduate Student<br>Trent University<br>Canada                                                     | McCluskey, Shannon<br>Wildlife Biologist<br>Murdoch University<br>United States of America (the)                                                     | McColly, Quinn<br>Research Assistant/PhD student<br>United States of America (the)                                                                 |
| McConkey, Kim<br>Ecology<br>NIAS<br>India                                                                                  | McConnell, David<br>Professor of Anthropology<br>The College of Wooster<br>United States of America (the)                                            | McConville, Kristian<br>Doctoral Researcher<br>Plymouth Marine Laboratory<br>United Kingdom of Great Britain and Northern Ireland (the)            |

|                                                                                                                                                |                                                                                                                                                                      |                                                                                                                                                     |
|------------------------------------------------------------------------------------------------------------------------------------------------|----------------------------------------------------------------------------------------------------------------------------------------------------------------------|-----------------------------------------------------------------------------------------------------------------------------------------------------|
| McCorkell, David<br>Freshwater Ecology<br>Scottish Environment Protection Agency<br>United Kingdom of Great Britain and Northern Ireland (the) | McCormick, Frank<br>Research Program Manager<br>United States of America (the)                                                                                       | McCormick, Gail<br>Ecologist, Science Writer<br>Penn State University<br>United States of America (the)                                             |
| McCormick, Mark<br>Professor, Marine Biology and Aquaculture<br>James Cook University<br>Australia                                             | McCormick-Ray, Jerry<br>Senior Scientist<br>University of Virginia<br>United States of America (the)                                                                 | McCowan, Fergus<br>Senior Systems Engineer<br>AMW Professional Services<br>Australia                                                                |
| McCoy, Karen<br>Research Director<br>CNRS<br>France                                                                                            | McCoy, Laura<br>Natural History Curator<br>Warwickshire Museum Service<br>United Kingdom of Great Britain and Northern Ireland (the)                                 | McCreery, Anna<br>Senior Research Analyst<br>Nonprofit in the energy sector<br>United States of America (the)                                       |
| McCreery, Kim<br>Conservation Biology<br>African Wild Dog Conservancy<br>United States of America (the)                                        | McCreless, Erin<br>Conservation Biology<br>University of Queensland<br>Australia                                                                                     | McCulloch, Kyle<br>Postdoc<br>Harvard University<br>United States of America (the)                                                                  |
| McCulloh, Katherine<br>Assistant Professor of Botany<br>University of Wisconsin-Madison<br>United States of America (the)                      | McCullough, Dale<br>Senior Fishery Scientist<br>Columbia River Inter-Tribal Fish Commission<br>United States of America (the)                                        | McCullough Hennessy, Sarah<br>Ecologist<br>San Diego Zoo Institute for Conservation Research<br>United States of America (the)                      |
| McDade, Lucinda<br>Executive Director / Plant Scientist<br>Rancho Santa Ana Botanic Garden<br>United States of America (the)                   | McDavitt, Bob *<br>Meteorologist<br>MetBob<br>New Zealand                                                                                                            | McDermott, Kirk<br>Assistant professor<br>Slippery Rock University of Pennsylvania<br>United States of America (the)                                |
| McDermott, Mike *<br>Ecologist<br>N/A<br>United Kingdom of Great Britain and Northern Ireland (the)                                            | McDiarmid, Roy<br>Research Zoologist & Curator of Amphibians & Reptiles<br>USGS, National Museum of Natural History, Washington DC<br>United States of America (the) | McDonald, David<br>Professor of Zoology & Physiology<br>University of Wyoming<br>United States of America (the)                                     |
| McDonald, Jennifer<br>Microbiologist<br>United States of America (the)                                                                         | mcdonald, justin<br>Principal Scientist - Biosecurity<br>Australia                                                                                                   | McDonald, Morag<br>Professor of Ecology and Catchment Management<br>Bangor University<br>United Kingdom of Great Britain and Northern Ireland (the) |

|                                                                                                                                        |                                                                                                                                                                                         |                                                                                                                                    |
|----------------------------------------------------------------------------------------------------------------------------------------|-----------------------------------------------------------------------------------------------------------------------------------------------------------------------------------------|------------------------------------------------------------------------------------------------------------------------------------|
| McDonald, Robbie<br>Chair in Natural Environment<br>University of Exeter<br>United Kingdom of Great Britain and Northern Ireland (the) | McDougall, MD, John<br>Researcher, author and medical doctor<br>The McDougall Program at <a href="http://www.drmcDougall.com">www.drmcDougall.com</a><br>United States of America (the) | McEntegart, Laura<br>Science Student<br>National University of Ireland Galway<br>Ireland                                           |
| McFadden, Michael<br>Conservation biology<br>Taronga Conservation Society Australia<br>Australia                                       | McFadden, Phil<br>Biochemistry and Biophysics<br>Oregon State University<br>United States of America (the)                                                                              | McFadden, Tyler<br>PhD Student<br>Stanford University<br>United States of America (the)                                            |
| McFadgen, Belinda<br>Environmental policy researcher<br>Institute for Environment Studies<br>New Zealand                               | McFarland, Kent<br>Conservation Biologist<br>Vermont Center for Ecostudies<br>United States of America (the)                                                                            | McGee, John<br>Prof., Dept. of Forest Resources and Environmental Conservation<br>Virginia Tech<br>United States of America (the)  |
| McGehee, Michael<br>Professor<br>Stanford University<br>United States of America (the)                                                 | McGeoch, Melodie A.<br>Professor, Ecology<br>Monash University<br>Australia                                                                                                             | McGlynn, Terrence<br>Professor of Biology<br>California State University Dominguez Hills<br>United States of America (the)         |
| McGovern, Barry<br>PhD Candidate<br>University of Queensland<br>Australia                                                              | McGranahan, Devan<br>Assistant Professor of Range Science<br>North Dakota State University<br>United States of America (the)                                                            | McGrannachan, Chris<br>Community Ecology<br>Monash University<br>Australia                                                         |
| McGrouther, Mark<br>Ichthyology Collection Manager<br>Australian Museum<br>Australia                                                   | McGuire, N P<br>computer science<br>Rice U.<br>United States of America (the)                                                                                                           | McHale, Cliona<br>Researcher, Environmental Health Science<br>University of California, Berkeley<br>United States of America (the) |
| McHardy, Cara Lynn<br>Industrial Ecology<br>Norwegian University of Science and Technology<br>United States of America (the)           | McHenry, Ewan<br>PhD Researcher, Ecology<br>University of Aberdeen<br>United Kingdom of Great Britain and Northern Ireland (the)                                                        | McHugh, Damhnait<br>Professor of Biology<br>Colgate University<br>United States of America (the)                                   |
| mchugh, susan<br>Professor of English<br>University of New England<br>United States of America (the)                                   | McIlwain, Jennifer<br>Head of Department<br>Curtin University<br>Australia                                                                                                              | McIntyre, Mary<br>retired; ecology, vector borne-disease, public health<br>University of Otago Wellington<br>New Zealand           |
| McKay, Alexa<br>Associate Editor<br>Nature Communications<br>United States of America (the)                                            | McKeen, Margaret<br>Geographical Information systems research assistant<br>James Hutton Institute, Aberdeen<br>United Kingdom of Great Britain and Northern Ireland (the)               | McKelvy, Alexander<br>Evolutionary Biology / Herpetology<br>City University of New York<br>United States of America (the)          |

|                                                                                                                   |                                                                                                                                                                            |                                                                                                                                                                                                                                         |
|-------------------------------------------------------------------------------------------------------------------|----------------------------------------------------------------------------------------------------------------------------------------------------------------------------|-----------------------------------------------------------------------------------------------------------------------------------------------------------------------------------------------------------------------------------------|
| Mckelvy, Marianne<br>PhD, Chemistry, retired<br>United States of America (the)                                    | McKenna, Christine<br>PhD Student, Climate Science<br>University of Cambridge<br>United Kingdom of Great Britain and Northern Ireland (the)                                | McKenna, Mary<br>Associate Professor - Ecologist<br>Howard University, Washington, DC<br>United States of America (the)                                                                                                                 |
| McKenzie, Elizabeth<br>Postdoctoral Research Fellow<br>Liggins Institute, University of Auckland<br>New Zealand   | McKie, Brendan G.<br>Associate Professor<br>Swedish University of Agricultural Sciences<br>Sweden                                                                          | McKinley, Vicky *<br>Professor of Biology<br>Roosevelt University<br>United States of America (the)                                                                                                                                     |
| McKinnon, Gay<br>Plant geneticist<br>School of Plant Science, University of Tasmania<br>Australia                 | McLean, Matthew<br>PhD Student<br>Ifremer<br>France                                                                                                                        | McLean, Tim<br>Ecology and Evolutionary Biology<br>Tulane University<br>United States of America (the)                                                                                                                                  |
| McLennan, Deborah<br>Professor/ Ecology & Evolutionary Biology<br>University of Toronto<br>Canada                 | Mcloughlin, Lee<br>Mesoamerica and Western Caribbean Program<br>Coordinator<br>Wildlife conservation society<br>United Kingdom of Great Britain and Northern Ireland (the) | McMahan, Caleb<br>Ichthyologist<br>The Field Museum of Natural History<br>United States of America (the)                                                                                                                                |
| McManus, Jeannine<br>Ecological researcher<br>Landmark Foundation<br>South Africa                                 | McManus, John<br>Professor, Marine Ecology<br>University of Miami<br>United States of America (the)                                                                        | MCMANUS, LIANA<br>BIOLOGICAL OCEANOGRAPHER<br>United States of America (the)                                                                                                                                                            |
| McMillan, Louise<br>PhD Student, Department of Statistics<br>University of Auckland<br>New Zealand                | McMullen, Laura<br>Conservation Biologist<br>The Xerces Society<br>United States of America (the)                                                                          | McMurray, Steven<br>Postdoctoral Researcher<br>University of North Carolina Wilmington<br>United States of America (the)                                                                                                                |
| McNary Wood, Kathleen<br>Principal Environmental Scientist<br>SWA Environmental<br>Turks and Caicos Islands (the) | McNaughton, Keith<br>Meteorology/hydrology<br>Private Researcher, ex University of Edinburgh<br>New Zealand                                                                | McNeely, David *<br>Retired Professor of Biological Sciences, University of Texas at Brownsville, Langston University/ Zoology and Ecology<br>University of Texas at Brownsville, Langston University<br>United States of America (the) |
| McNeill, John<br>Professor of Environmental History<br>Georgetown University<br>United States of America (the)    | McPherran, Anna<br>PhD Student, Ecology and Evolution<br>Stony Brook University<br>United States of America (the)                                                          | McPherson, Gordon<br>United States of America (the)                                                                                                                                                                                     |

|                                                                                                                                                    |                                                                                                                                                          |                                                                                                                                                      |
|----------------------------------------------------------------------------------------------------------------------------------------------------|----------------------------------------------------------------------------------------------------------------------------------------------------------|------------------------------------------------------------------------------------------------------------------------------------------------------|
| McQuatters-Gollop, Abigail<br>Lecturer in Marine Conservation<br>Plymouth University<br>United Kingdom of Great Britain and Northern Ireland (the) | McQueen, Alexandra<br>PhD candidate, Ecology<br>Monash University<br>Australia                                                                           | McQueen, David<br>Meteorologist<br>Australia                                                                                                         |
| McQueen, Donald<br>Emeritus Research Professor<br>York University<br>Canada                                                                        | McRae, Ellen<br>Science Director<br>Forest and Marine Reserves Association of Caye Caulker<br>Belize                                                     | McRae, Louise<br>Research Associate<br>Zoological Society of London<br>United Kingdom of Great Britain and Northern Ireland (the)                    |
| McTaggart, Alistair<br>Postdoctoral Fellow<br>University of Pretoria<br>Australia                                                                  | McVicar, Tim<br>Remote Sensing Ecohydrology<br>Co-Editor-in-Chief: Journal of Hydrology<br>Australia                                                     | Meakin, Craig<br>Scientific officer, Natural Resource Management<br>Gov<br>Australia                                                                 |
| Meaney, Carron<br>PhD Ecologist<br>University of Colorado<br>United States of America (the)                                                        | Measey, John<br>Senior Researcher in the Centre for Invasion Biology<br>Stellenbosch University<br>South Africa                                          | Meave, Jorge A.<br>Full Professor in Plant Ecology and Vegetation Science<br>Universidad Nacional Autonoma de Mexico, Facultad de Ciencias<br>Mexico |
| Mech, Stephen<br>Professor of Biology<br>Albright College<br>United States of America (the)                                                        | Mechlin, Beth<br>Assistant Professor of Psychology<br>Earlham College<br>United States of America (the)                                                  | MEDAIL, Frédéric<br>Professor in Ecology and Biogeography<br>Aix-Marseille University<br>France                                                      |
| Medeiros, Aline<br>Graduate student<br>National Institute of Amazonian Research<br>Brazil                                                          | Medeiros, Lucas<br>Graduate student in Ecology<br>University of São Paulo<br>Brazil                                                                      | Medeiros, Marcelo<br>Professor of Sociology<br>University of Brasilia<br>Brazil                                                                      |
| Medeiros, Renata<br>Seabird ecologist<br>Cardiff University<br>United Kingdom of Great Britain and Northern Ireland (the)                          | Medeiros, Rodrigo<br>Vice President / Associate Professor<br>Conservation International Brazil / Federal Rural<br>University of Rio de Janeiro<br>Brazil | Medeiros Neto, Ciro<br>Physiotherapy<br>UEPB<br>Brazil                                                                                               |
| Medellin, Rodrigo<br>Senior Professor of Ecology<br>Institute of Ecology, National Autonomous University of Mexico, UNAM<br>Mexico                 | Mederos, Jorge<br>Biologists Entomologist<br>Museu Ciències Naturals de Barcelona<br>Spain                                                               | Mediavilla, Sonia<br>Professor assistant ecology<br>University of Salamanca<br>Spain                                                                 |

|                                                                                                                 |                                                                                                          |                                                                                                                             |
|-----------------------------------------------------------------------------------------------------------------|----------------------------------------------------------------------------------------------------------|-----------------------------------------------------------------------------------------------------------------------------|
| Mediavilla Pascual, Margarita<br>System Dynamics<br>Universidad de Valladolid<br>Spain                          | Medici, Alberto<br>Sociology<br>Brazil                                                                   | Medina, Carlos *<br>Researcher (Microbiology)<br>University Pablo de Olavide<br>Spain                                       |
| MEDINA, DIANA PAOLA<br>CHEMISTRY<br>UNIVERSIDAD AUTÓNOMA DE MADRID<br>Spain                                     | Medina Tanco, Gustavo<br>PhD Prof. Physics<br>ICN-UNAM<br>Mexico                                         | Medina-Müller, Margarita<br>Biologist<br>Consultancy<br>Peru                                                                |
| Medina-Sánchez, Juan Manuel<br>Associate Professor - Ecology<br>Universidad de Granada<br>Spain                 | MEDINA-VEGA, JA<br>PhD Candidate<br>Wageningen University and Research<br>Ecuador                        | Meehan, Pascale<br>PhD student, Anthropology<br>University of Colorado, Boulder<br>United States of America (the)           |
| Meek, Johannes<br>Retired professor of funcional morphology<br>Radboud University Nijmegen<br>Netherlands (the) | Meek, Paul<br>Adjunct Lecturer<br>University of New England<br>Australia                                 | Meekan, Mark<br>Research Scientist<br>Australia                                                                             |
| Meeuwig, Jessica<br>Professor of Marine Science<br>University of Western Australia<br>Australia                 | Meffe, Gary<br>Conservation Biology<br>University of Florida (retired)<br>United States of America (the) | Megraw, Molly<br>Assistant Professor, Botany & Plant Pathology<br>Oregon State University<br>United States of America (the) |
| Mehl, Adrian<br>environmental engineer<br>ETH Zürich<br>Switzerland                                             | Mehl, Calvin<br>MSc Biology student<br>University of KwaZulu-Natal<br>South Africa                       | Mehl, Ryan<br>Professor<br>Oregon State University<br>United States of America (the)                                        |
| Mehra, Sarita<br>Environmental Professional<br>Rajputana Society of Natural History<br>India                    | Mehra, Satya Prakash *<br>Environmental Professional<br>Rajputana Society of Natural History<br>India    | Mehretu, Assefa<br>Professor Emeritus<br>Michigan State University<br>United States of America (the)                        |
| Meier, Eliane<br>Research fellow<br>Agroscope<br>Switzerland                                                    | Meijaard, Erik<br>Honorary Professor<br>University of Queensland<br>Netherlands (the)                    | Meikar, Oliver<br>Scientist, molecular biology<br>Tartu University<br>Estonia                                               |
| Meinard, Yves<br>CNRS Researcher, Decision Science<br>CNRS, Paris-Dauphine University<br>France                 | Meincke, Jens<br>Professor in Physical Oceanography<br>University of Hamburg<br>Germany                  | Meinikmann, Karin<br>Post-doc in Freshwater Science<br>IGB Berlin, Germany<br>Germany                                       |
| Meintzer, Phillip<br>MSc Marine Biology Graduate Student<br>Memorial University of Newfoundland<br>Canada       | Meir, Patrick<br>Professor, Forest Ecosystem Science<br>Australian National University<br>Australia      | Meira, Teresa<br>PhD Candidate in Ecological Economics<br>Universidade Federal Fluminense<br>Brazil                         |

|                                                                                                                    |                                                                                                                   |                                                                                                                                                 |
|--------------------------------------------------------------------------------------------------------------------|-------------------------------------------------------------------------------------------------------------------|-------------------------------------------------------------------------------------------------------------------------------------------------|
| Meira-Neto, Joao<br>Full Professor<br>Universidade Federal de Vicosa<br>Brazil                                     | Meirelles, Gabriela<br>PhD student<br>Universidade Federal de Lavras<br>Brazil                                    | Meirelles, Pedro<br>Assistant Professor<br>Federal University of Bahia<br>Brazil                                                                |
| Meiri, Shai<br>Associate professor / Zoology<br>Tel Aviv University<br>Israel                                      | Meirmans, Patrick<br>Assistant Professor in Population Genetics<br>University of Amsterdam<br>Netherlands (the)   | Meisch, Claude<br>Zoologist<br>Musée national d'histoire naturelle de Luxembourg<br>Luxembourg                                                  |
| Meisel, Moritz<br>Germany                                                                                          | Mejia, Luis<br>Researcher<br>INDICASAT AIP<br>Panama                                                              | Mejía Correa, Paulina<br>Candidata a Doctora en Ecología Tropical<br>Centro de Investigaciones Tropicales, Universidad<br>Veracruzana<br>Mexico |
| Mekers, Pamela<br>Environmental scientist<br>UTAS<br>Australia                                                     | Meldrum, Hamish<br>Physician<br>Australia                                                                         | Melendez, Jorge<br>Professor in Astronomy<br>Universidade de Sao Paulo<br>Brazil                                                                |
| Meléndez, Adrià<br>Postdoc in Geophysics<br>Institut de Ciències del Mar<br>Spain                                  | Meléndez Ramírez, Virginia<br>Research-Professor<br>Universidad Autónoma de Yucatán<br>Mexico                     | Melendez-Ackerman, Elvia<br>Professor, Plant Ecology<br>University of Puerto Rico at Rio Piedras<br>Puerto Rico                                 |
| Melendez-Vasquez, Carmen<br>Associate Professor of Biology<br>Huntwer College<br>United States of America (the)    | Melero, Yolanda<br>Postdoctoral Researcher<br>CREAF<br>Spain                                                      | Melguizo-Ruiz, Nereida<br>Doctor<br>CIBIO/InBIO/University of Evora<br>Portugal                                                                 |
| Melián, Edgardo<br>Becario Doctoral de CONICET<br>Dpto. de Biología, Universidad Nacional de San Juan<br>Argentina | Melin, Amanda<br>Assistant Professor<br>University of Calgary<br>Canada                                           | MELIN, Frederic<br>Research in Earth Sciences<br>Italy                                                                                          |
| Melki de Souza, Renata<br>Teacher<br>Unifesp<br>Brazil                                                             | Mellado, Jesús<br>Biologist<br>Consejo Superior Investigaciones Cientificas<br>Spain                              | Mellado Garcia, Ana<br>PhD Ecology<br>University of Granada<br>Spain                                                                            |
| Mellado-Diaz, Andres<br>Freshwater Ecologist<br>DBO5 SL<br>Spain                                                   | Mellbye, Brett<br>AFRI-NIFA USDA Postdoctoral Fellow<br>Oregon State University<br>United States of America (the) | Mello, Natália<br>PhD Student<br>KU Leuven<br>Belgium                                                                                           |

|                                                                                                                                                |                                                                                                                               |                                                                                                                                                                      |
|------------------------------------------------------------------------------------------------------------------------------------------------|-------------------------------------------------------------------------------------------------------------------------------|----------------------------------------------------------------------------------------------------------------------------------------------------------------------|
| Mellow, David<br>Retired<br>United States of America (the)                                                                                     | Melo, Felipe<br>Ecology<br>Universidade Federal de Pernambuco<br>Brazil                                                       | Melo, María Cecilia<br>Researcher Entomology<br>Museo de La Plata, CONICET<br>Argentina                                                                              |
| Melovski, Dime<br>Wildlife Biologist<br>Macedonian Ecological Society<br>Macedonia, Republic of (the former Yugoslavia)                        | Melton, Sierra<br>Student, Geology and climate science<br>Colorado College<br>United States of America (the)                  | Melvin, Robert<br>United States of America (the)                                                                                                                     |
| Menchaca Rodriguez, Angelica<br>Postgraduate Researcher<br>University of Bristol<br>United Kingdom of Great Britain and Northern Ireland (the) | Mencía, Mario<br>Assistant Professor<br>Autonomous University Madrid<br>Spain                                                 | Mendelsohn, Beth<br>University of Wyoming<br>United States of America (the)                                                                                          |
| Mendelson III, Joseph R<br>Director of Research<br>Zoo Atlanta<br>United States of America (the)                                               | Mendes, Cecili<br>Master in Tropical Marine Sciences<br>Universidade de São Paulo<br>Brazil                                   | Mendes, Clarice<br>Graduated in Biological Sciences (Ecology)<br>Universidade do Estado do Rio de Janeiro - UERJ<br>Brazil                                           |
| Mendes, Thiago<br>Postdoctoral Fellow<br>Universidade Federal do Rio de Janeiro<br>Brazil                                                      | Mendes Bezerra, Ana Carolina<br>PHD student<br>UFRJ<br>Brazil                                                                 | Mendes Costa, Elias<br>PhD student<br>Federal Rural University of Rio de Janeiro<br>Brazil                                                                           |
| Mendez, German<br>Marine biologist<br>Mendez<br>Mexico                                                                                         | Mendez, German<br>Marine Biologist<br>Cozumel Coral Reed Restoration ONG<br>Mexico                                            | Mendez, Javier *<br>Marine Biology<br>University of Hawaii at Manoa<br>United States of America (the)                                                                |
| Mendez, Loriane<br>PhD student<br>Centre d'Etudes Biologiques de Chizé - Université de la Rochelle<br>France                                   | MENDEZ ALONZO, RODRIGO<br>Investigador<br>Centro de Investigacion Cientifica y de Educacion Superior de Ensenada BC<br>Mexico | Mendez Aragon, Veronica<br>Senior Research Associate/Conservation ecology<br>University of East Anglia<br>United Kingdom of Great Britain and Northern Ireland (the) |
| Mendez Fernandez, Leire<br>Postdoctoral Researcher, Environmental Toxicology<br>University of the Basque Country<br>Spain                      | Mendo, Tania<br>Research Fellow<br>University of St. Andrews<br>United Kingdom of Great Britain and Northern Ireland (the)    | Mendola, Ph.D., Dominick<br>Senior Development Engineer<br>UCSD, Scripps Institution of Oceanography<br>United States of America (the)                               |
| Mendonca, Andre<br>Associate researcher / ecology<br>Universidade de Brasilia<br>Brazil                                                        | Mendonça, Raquel<br>Post doctoral researcher<br>Universidade Federal de Juiz de Fora<br>Brazil                                | Mendonça-Furtado, Olívia<br>Post-doc researcher<br>University of São Paulo<br>Brazil                                                                                 |



|                                                                                                                                                    |                                                                                                                                         |                                                                                                                          |
|----------------------------------------------------------------------------------------------------------------------------------------------------|-----------------------------------------------------------------------------------------------------------------------------------------|--------------------------------------------------------------------------------------------------------------------------|
| Mendoza, Blanca<br>Profesor in Geophysics<br>Universidad Nacional Autonoma de México<br>Mexico                                                     | MENDOZA, DINORAH *<br>MENDOZA<br>Spain                                                                                                  | Mendoza, Laura<br>Post-doc in Applied Mathematics<br>France                                                              |
| Mendoza, Manuel<br>Full Researcher, Ecology<br>National Museum of Natural History (MNCN), Spanish<br>Scientific Council (CSIC)<br>Spain            | MENDOZA, ROBERTO<br>HEAD OF THE ECOPHYSIOLOGY LAB<br>UNIVERSIDAD AUTONOMA DE NUEVO LEON<br>Mexico                                       | Mendoza, Teodoro<br>Professor of crop science---'sgroecology<br>UP LOS BANOS LAGUNA PHIL.<br>Philippines (the)           |
| Meneghel, Melitta<br>Professor, Vertebrate Zoology<br>Facultad de Ciencias, Universidad de la República<br>Uruguay                                 | menegozzo, adriana<br>Italy                                                                                                             | Menendez Lopez, Margarita<br>Full professor, Ecology and Limnology<br>University of Barcelona<br>Spain                   |
| Menéndez Serra, Mateu<br>PhD Student. Microbial Ecology<br>Center for Advanced Studies of Blanes (CEAB-CSIC) /<br>University of Barcelona<br>Spain | Menezes, Rosemberg<br>Adjunct Professor<br>Universidade Federal da Paraíba<br>Brazil                                                    | Menin, Marcelo<br>Associate Professor<br>Universidade Federal do Amazonas, Instituto de Ciências<br>Biológicas<br>Brazil |
| Menkhorst, Peter<br>Principle Scientist<br>Arthur Rylah Institute for Environmental Research<br>Australia                                          | Mennerat, Adele<br>Associate Professor, Evolutionary Ecology<br>France                                                                  | MENNERAT, François<br>Physician (MD)<br>Pensioned<br>France                                                              |
| MENNERAT, Jeannine<br>Teacher in Biology<br>Pensioned<br>France                                                                                    | Menon, Marcio José<br>Professor of Physics<br>Campinas State University<br>Brazil                                                       | Menon, Vivek<br>Executive Director<br>Wildlife Trust of India<br>India                                                   |
| Ménoni, Emmanuel<br>Wildlife Biologist<br>National Office of Game and Wildlife (Office National de<br>la Chasse et de la Faune Sauvage)<br>France  | Mentges, Andrea<br>PhD student<br>Institute for Chemistry and Biology of the Marine<br>Environment, University of Oldenburg<br>Germany  | Mentz, Steve<br>Professor of English<br>St John's University<br>United States of America (the)                           |
| Mercalli, Luca<br>Climatologist<br>Italian Meteorological Society<br>Italy                                                                         | Mercer, Edwina *<br>Water Science<br>Cranfield Water Science Institute<br>United Kingdom of Great Britain and Northern Ireland<br>(the) | Merchán Rubira, Jesús<br>Predoctoral researcher in Neurobiology<br>Severo Ochoa Centre for Molecular Biology<br>Spain    |
| Merckx, Thomas<br>Postdoctoral researcher<br>Earth & Life Institute, Université catholique de Louvain<br>Belgium                                   | Meredith, Laura<br>Assistant Professor of Ecosystem Genomics<br>University of Arizona<br>United States of America (the)                 | Meredith-Jones, Kim<br>Research Fellow/ Department of Medicine<br>University of Otago<br>New Zealand                     |

|                                                                                                                                                      |                                                                                                                                                                                                  |                                                                                                     |
|------------------------------------------------------------------------------------------------------------------------------------------------------|--------------------------------------------------------------------------------------------------------------------------------------------------------------------------------------------------|-----------------------------------------------------------------------------------------------------|
| Meref, Mikaa<br>Professor of Arctic and Antarctic economics and geopolitics<br>Institut Libre d'Etude des Relations Internationales, Paris<br>France | Meregalli, Massimo<br>Researcher, Entomologist<br>University of Turin<br>Italy                                                                                                                   | Mergenci, Ayse<br>PhD student<br>Bogaziçi University<br>Turkey                                      |
| Merida-Floriano, Angela<br>PhD<br>University of Seville<br>Spain                                                                                     | Mérigot, Bastien<br>Associate Professor<br>Montpellier University<br>France                                                                                                                      | Merilä, Juha<br>Professor in Population Genetics<br>University of Helsinki<br>Finland               |
| Meriluoto, Jussi<br>Researcher, Biochemistry<br>Åbo Akademi University<br>Finland                                                                    | Merinero, Sonia<br>Postdoc researcher<br>Stockholm University<br>Sweden                                                                                                                          | Merino, Marta<br>Coastal Engineer<br>The Danish Coastal Authority<br>Denmark                        |
| Merino, Santiago<br>Professor of Research<br>Higher Council for Scientific Research<br>Spain                                                         | Merino-Ibarra, Martin<br>Full Time Senior Researcher (Investigador Titular C de tiempo completo)<br>Institute of Ocean Sciences and Limnology, Universidad Nacional Autónoma de México<br>Mexico | Merino-Martín, Luis<br>Post Doctoral Researcher / Soil ecology<br>INRA<br>France                    |
| Merkel, Benjamin<br>marine biologist<br>Norway                                                                                                       | Merkel, Fabian<br>PhD student<br>EMBL Heidelberg<br>Germany                                                                                                                                      | Merlin, Roberto<br>Professor of Physics<br>University of Michigan<br>United States of America (the) |
| Merlo, Luca<br>Staff member. Physics<br>Universidad Autonoma de Madrid<br>Spain                                                                      | Mermudes, Jose *<br>Professor<br>Universidade Federal do Rio de Janeiro<br>Brazil                                                                                                                | Merrey, Douglas<br>Independent Consultant, Social Scientist<br>United States of America (the)       |
| Merselis, Daniel<br>PhD candidate / Coral Biologist<br>Florida International University<br>United States of America (the)                            | Mertens, Jan<br>Professor urban green and nature<br>Ghent University<br>Belgium                                                                                                                  | Mertens, Kewan<br>PhD natural resource economics<br>KU Leuven<br>Belgium                            |
| Mertes, Laura<br>Scientist of Physics<br>Technical University Darmstadt<br>Germany                                                                   | Mertzanis, Yorgos<br>Senior Scientist<br>CALLISTO - Wildlife and Nature Conservation Society<br>Greece                                                                                           | Méry, Geneviève<br>Biologiste, Lic. ès Sciences<br>Bureau L'Aubépine<br>Switzerland                 |
| Mesa, Oscar<br>Professor, Hydrolgy<br>Universidad Nacional de Colombia<br>Colombia                                                                   | Mesa Cuadros, Gregorio<br>Lawyer, Msc in Law and Doctor in Law<br>Faculty of Law, Political and Social Sciences, National University of Colombia<br>Colombia                                     | Mesibov, Robert<br>Taxonomist<br>Retired, unaffiliated<br>Australia                                 |

|                                                                                                                             |                                                                                                           |                                                                                                                                        |
|-----------------------------------------------------------------------------------------------------------------------------|-----------------------------------------------------------------------------------------------------------|----------------------------------------------------------------------------------------------------------------------------------------|
| Mesleard, François<br>Professor ecology/ research director<br>Tour du valat/university of Avignon<br>France                 | Mesmin, TCHINDJANG<br>Prof of Geography and environmental studies<br>University of Yaoundé I,<br>Cameroon | Mesnage, Robin<br>Computational toxicologist<br>King's College London<br>United Kingdom of Great Britain and Northern Ireland<br>(the) |
| Mesochina, Pascal *<br>Ecologist<br>France                                                                                  | Mesquita, Geison *<br>Research Biodiversity<br>Universitat Autònoma de Barcelona - UAB<br>Spain           | Mesquita, Rickson<br>Assistant Professor<br>University of Campinas<br>Brazil                                                           |
| Mesquita, Rita<br>PhD in Ecology, Researcher<br>Brazilian National Institute for Research in the Amazon -<br>INPA<br>Brazil | Mesquita-Joanes, Francesc<br>Associate Professor of Ecology<br>University of Valencia<br>Spain            | Messier, Julie<br>Postdoctoral Researcher, Ecology and Evolution<br>Université de Sherbrooke<br>Canada                                 |
| Mestre, Joao Nuno<br>Postdoctoral researcher<br>University of Coimbra<br>Portugal                                           | Mestre, Laia<br>University of Koblenz-Landau<br>Germany                                                   | Mestre, Mireia<br>Marine Microbiology<br>ICM-CSIC<br>Spain                                                                             |
| Mestres, Francesc<br>Associate Professor of Genetics<br>Universitat de Barcelona<br>Spain                                   | Metali, Faizah<br>Lecturer in Plant and Soil science<br>Universiti Brunei Darussalam<br>Brunei Darussalam | Metaxas, Anna<br>Professor in Oceanography<br>Dalhousie University<br>Canada                                                           |
| Metcalfe, Dean<br>Zoologist<br>Australia                                                                                    | Mettouris, Onoufrios<br>Phd, Ecology and Zoology<br>Cyprus                                                | Metz, Margaret<br>Assistant Professor<br>Lewis & Clark College<br>United States of America (the)                                       |
| Metz, Shirley<br>Geographer<br>Apex Expeditions<br>United States of America (the)                                           | Metzker, Thiago<br>Director<br>IBAM - Instituto Bem Ambiental<br>Brazil                                   | METZL, Nicolas<br>Senior Scientist, Oceanography<br>CNRS<br>France                                                                     |
| Meunier, Félicien<br>PhD in soil sciences<br>Université catholique de Louvain<br>Belgium                                    | Meurer, Katharina<br>PostDoc<br>Swedish University of Agricultural Sciences<br>Sweden                     | Mevenkamp, Lisa<br>PhD candidate Marine Biology<br>Ghent University<br>Belgium                                                         |
| Mewis, Heike<br>Freie Universität Berlin<br>Germany                                                                         | Mexia, Teresa<br>PhD Student of Forestry Engineering<br>ISA<br>Portugal                                   | Meyer, Amelie<br>Physical Oceanographer<br>Norwegian Polar Institute<br>Norway                                                         |

|                                                                                                                             |                                                                                                                                    |                                                                                                                                                         |
|-----------------------------------------------------------------------------------------------------------------------------|------------------------------------------------------------------------------------------------------------------------------------|---------------------------------------------------------------------------------------------------------------------------------------------------------|
| Meyer, Armin<br>Reserach Scientist<br>Helmholtz Zentrum München<br>Germany                                                  | Meyer, Astrid<br>scientific project manager<br>Helmholtz Center Munich - Institute of Groundwater<br>Ecology<br>Germany            | Meyer, Axel<br>Professor of Biology<br>University of Konstanz<br>Germany                                                                                |
| Meyer, Britta<br>GEOMAR<br>Germany                                                                                          | Meyer, Carsten<br>Junior Research Group Leader<br>German Centre for Integrative Biodiversity Research (iDiv)<br>Germany            | Meyer, Christoph<br>Lecturer in Global Ecology & Conservation<br>University of Salford<br>United Kingdom of Great Britain and Northern Ireland<br>(the) |
| Meyer, Eileen<br>Assistant Professor, Physics<br>University of Maryland, Baltimore County<br>United States of America (the) | Meyer, Joao Frederico<br>Professor of Biomathematics and Numerical Analysis<br>State University at Campinas - UNICAMP<br>Brazil    | Meyer, Julien<br>Permanent Researcher/ Bioacoustics and Language<br>Sciences<br>Univ. Grenoble Alpes, CNRS, GIPSA-Lab, Grenoble, France<br>France       |
| Meyer, Katrin M.<br>Senior Lecturer and Researcher in Ecological Modelling<br>University of Göttingen<br>Germany            | Meyer, Luke<br>MSME Student<br>Massachusetts Institute of Technology (MIT)<br>United States of America (the)                       | Meyer, Michel<br>Geologist<br>SIG-Geneva<br>Switzerland                                                                                                 |
| Meyer, Nils<br>Germany                                                                                                      | Meyer, Sebastian T.<br>Researcher Ecology<br>Technical University of Munich<br>Germany                                             | Meyer, Tara<br>Wildlife Biologist and Conservation Scientist<br>Washington Department of Fish and Wildlife<br>United States of America (the)            |
| Meyer, Ulf-Niklas<br>Scientific staff and PhD candidate<br>Institute of Landscape Ecology; University of Münster<br>Germany | Meyer, Vera<br>Professor for Microbiology<br>Technische Universität Berlin<br>Germany                                              | Meyer, Wayne<br>Professor Natural Resource Science<br>University of Adelaide<br>Australia                                                               |
| Meyer Steiger, Dagmar<br>Research Fellow<br>James Cook University<br>Australia                                              | MEYER-ROCHOW, Victor Benno<br>Managing Director<br>Research Institute of Luminous Organisms<br>Japan                               | Meynier, Adeline<br>Phd candidate - environmental law<br>Université Jean Moulin Lyon 3<br>France                                                        |
| Meynier, Simon<br>PhD student<br>Irstea<br>France                                                                           | Meyns, Michaela<br>Postdoctoral scientist<br>Alfred-Wegener-Institute Helmholtz Centre for polar and<br>marine research<br>Germany | Meza-Vargas, Vanessa<br>Biologist<br>Pontificia Universidade Catolica do Rio Grande do Sul<br>Brazil                                                    |

|                                                                                                                                                                    |                                                                                                                                                  |                                                                                                                 |
|--------------------------------------------------------------------------------------------------------------------------------------------------------------------|--------------------------------------------------------------------------------------------------------------------------------------------------|-----------------------------------------------------------------------------------------------------------------|
| Mezquida, Eduardo T.<br>Assistant Professor, Ecology<br>Universidad Autonoma de Madrid<br>Spain                                                                    | MG Apgaua, Deborah<br>Postdoctoral Fellow<br>James Cook University<br>Australia                                                                  | M'ghirbi, Youmna<br>Assistant professor<br>Institute Pasteur of Tunis<br>Tunisia                                |
| Miceli, Joseph<br>Research Project Coordinator, Molecular Biology and<br>Environmental Biotechnology<br>Arizona State University<br>United States of America (the) | Michaelis, Jana<br>Vegetation Ecology and Conservation Biology<br>University of Bremen<br>Germany                                                | Michalczyk, Łukasz<br>Associate Professor / Biology<br>Jagiellonian University<br>Poland                        |
| MICHEL, Bruno<br>Researcher/systematic entomology<br>Cirad<br>France                                                                                               | Michel, Loic<br>Postdoctoral researcher<br>University of Liege<br>Belgium                                                                        | Michel, Monsigny<br>professor of Biochemistry<br>CNRS & University of Orléans France<br>France                  |
| Michelet, Lorraine<br>Researcher<br>ANSES<br>France                                                                                                                | Michelle, Michelle<br>Ecological Economist<br>David Suzuki Foundation<br>Canada                                                                  | Michez, Denis<br>Assistant Professor/Biology<br>University of Mons<br>Belgium                                   |
| Michielsen, Hans *<br>Psychology<br>United States of America (the)                                                                                                 | Mickelson, Aaron<br>Tropical Conservation Biology and Environmental<br>Scientist<br>University of Hawai'i Hilo<br>United States of America (the) | Micol, Thierry<br>Head of department<br>LPO/BirdLife partner<br>France                                          |
| Middleton, Sara Lil<br>Imperial College London<br>United Kingdom of Great Britain and Northern Ireland<br>(the)                                                    | Midendorf, George<br>Professor/Biology<br>Howard University<br>United States of America (the)                                                    | Midgley, John<br>Assistant Director: Natural Science<br>KwaZulu-Natal Museum<br>South Africa                    |
| Midlane, Neil<br>Conservation Biologist<br>Singita<br>South Africa                                                                                                 | Migliano, Andrea<br>Reader<br>UCL<br>United Kingdom of Great Britain and Northern Ireland<br>(the)                                               | Migoni Alexandre, Elizabeth<br>Ph.D. candidate Environmental Sciences<br>Leiden University<br>Netherlands (the) |
| Migotto, Alvaro<br>Associate Professor<br>Univeristy of Sao Paulo<br>Brazil                                                                                        | Miguek, Bacic<br>Full Professor, Economics<br>Universidade Estadual de Campinas = UNICAMP<br>Brazil                                              | Miguel, Jose<br>PhD Candidate<br>University of São Paulo<br>Brazil                                              |
| Miguel-Chinchilla, Leticia<br>Freshwater Ecologist<br>United Kingdom of Great Britain and Northern Ireland<br>(the)                                                | Miguet, Paul<br>PhD in Ecology<br>France                                                                                                         | Migura, Lourdes<br>Researcher<br>IRTA-CReSA<br>Spain                                                            |

|                                                                                                                                                                                    |                                                                                                                               |                                                                                                                       |
|------------------------------------------------------------------------------------------------------------------------------------------------------------------------------------|-------------------------------------------------------------------------------------------------------------------------------|-----------------------------------------------------------------------------------------------------------------------|
| Mihajlović, Dijana<br>PhD, teaching assistant in Inorganic and Nuclear Chemistry<br>University of Banja Luka, Faculty of Agriculture<br>Bosnia and Herzegovina                     | Mihoub, Jean-Baptiste<br>Lecturer<br>Sorbonne Universités, UPMC Université Paris 06<br>France                                 | Mikulecky, Dr Donald C<br>Physiology/Biophysics<br>Virginia Commonwealth University<br>United States of America (the) |
| Milá, Borja<br>Researcher<br>Consejo Superior de Investigaciones Científicas<br>Spain                                                                                              | Miladi, Milad<br>Research Assistant<br>University of Freiburg<br>Germany                                                      | Milenkaya, Olga<br>Assistant Professor of Biology<br>Young Harris College<br>United States of America (the)           |
| Miler, Marko<br>Research assistant<br>Institute for Biological Research “Siniša Stanković”,<br>University of Belgrade<br>Serbia                                                    | Miles, Joel<br>Agriculture and Invasive Species<br>Retired<br>Palau                                                           | Milewski, Morlin<br>Research Technician<br>EMBL Hamburg<br>Germany                                                    |
| Milich, Lenard<br>Head of Nutrition-Sensitive Agriculture project; crop<br>growth conditions<br>Welthungerhilfe e.V.<br>Germany                                                    | Milla, Ruben<br>Professor<br>Universidad Rey Juan Carlos<br>Spain                                                             | Millan, Andres<br>Lecturer Ecology<br>Murcia University<br>Spain                                                      |
| Millan, Andres<br>Ecology<br>University of Murcia<br>Spain                                                                                                                         | Millar, Elinor<br>Public Health Research Fellow<br>University of Otago<br>New Zealand                                         | Miller, Andrew<br>Assistant Professor<br>Cornell University<br>United States of America (the)                         |
| Miller, Brian<br>Senior Scientist<br>Denver Zoological Foundation at Rio Mora NWR<br>United States of America (the)                                                                | Miller, Eleanor F.<br>PhD Student<br>University of Cambridge<br>United Kingdom of Great Britain and Northern Ireland<br>(the) | Miller, Fiona<br>Associate Professor of Health Policy<br>University of Toronto<br>Canada                              |
| Miller, Jennifer<br>Postdoctoral Researcher<br>Department of Environmental Science, Policy, and<br>Management, University of California-Berkeley<br>United States of America (the) | Miller, John<br>Carbon Cycle Scientist<br>United States of America (the)                                                      | Miller, Jonathan<br>PhD student /Biology/Ecology<br>Museo Nacional de Ciencias Naturales<br>Spain                     |
| Miller, Jonathan *<br>Ecologist, Degree in forest science<br>Australia                                                                                                             | Miller, Kyle<br>United States of America (the)                                                                                | Miller, Matthew R.<br>MSc in Ocean Science<br>University of Victoria<br>Canada                                        |

|                                                                                                                                        |                                                                                                                                                    |                                                                                                                                                                                           |
|----------------------------------------------------------------------------------------------------------------------------------------|----------------------------------------------------------------------------------------------------------------------------------------------------|-------------------------------------------------------------------------------------------------------------------------------------------------------------------------------------------|
| Miller, Melissa<br>Post-doctoral Researcher<br>Auburn University<br>United States of America (the)                                     | Miller, Peter<br>Principal Earth Observation Scientist<br>Plymouth Marine Laboratory<br>United Kingdom of Great Britain and Northern Ireland (the) | Miller, Raeanne<br>Knowledge Exchange and Communication Manager - Marine Science<br>Scottish Association for Marine Science<br>United Kingdom of Great Britain and Northern Ireland (the) |
| Miller, Susan<br>Conservation Biologist<br>University of Cape Town<br>South Africa                                                     | Miller-Derhe, Mia<br>Biodiversity Research Manager<br>Dian Fossey Gorilla Fund International<br>Rwanda                                             | Milligan, Brook<br>Professor of Biology<br>New Mexico State University<br>United States of America (the)                                                                                  |
| Milligan, Rosanna<br>Marine Ecologist<br>NSU<br>United States of America (the)                                                         | MILLON, Alexandre<br>Lecturer<br>Aix Marseille Université<br>France                                                                                | Millross, Thomas<br>Industrial Ecologist<br>TU Delft & Leiden University<br>Netherlands (the)                                                                                             |
| Mills, Gus<br>Ecologist<br>South Africa                                                                                                | Mills, Michael<br>South Africa                                                                                                                     | Milne, Eleanor<br>Research Fellow, GHG Accounting<br>Colorado State University<br>United Kingdom of Great Britain and Northern Ireland (the)                                              |
| Milne, Ian<br>Senior Ecologist<br>Scottish Environment Protection Agency<br>United Kingdom of Great Britain and Northern Ireland (the) | Milne, Sol<br>PhD candidate<br>University of Aberdeen<br>United Kingdom of Great Britain and Northern Ireland (the)                                | Milonas, Panagiotis<br>Greece                                                                                                                                                             |
| Milstein, Daniela<br>Professor<br>Universidade Federal de Sao Paulo<br>Brazil                                                          | Milton, Suzanne Jane<br>Research Associate<br>South African Environmental Observation Network<br>South Africa                                      | Mimet, Anne<br>Postdoctoral researcher<br>Helmholtz Centre for Environmental Research<br>Germany                                                                                          |
| Mincarone, Michael<br>Professor / Zoology<br>Universidade Federal do Rio de Janeiro (UFRJ)<br>Brazil                                   | Ming, Jing<br>Postdoctoral Scientist<br>Max Planck Institute for Chemistry<br>China                                                                | Ming, Lin Chau<br>Full Professor - Horticulture and Ethnobotany<br>São Paulo State University - Botucatu campus<br>Brazil                                                                 |
| Minghetti, Eugenia<br>Museo de La Plata<br>Argentina                                                                                   | Minguez, Laetitia<br>Research scientist - Ecotoxicology<br>Interdisciplinary Laboratory for Continental Environments (LIEC), CNRS<br>France        | Minier, Christophe<br>Professor - Ecotoxicology<br>Normandie University<br>France                                                                                                         |

|                                                                                                                                                                  |                                                                                                                               |                                                                                                                 |
|------------------------------------------------------------------------------------------------------------------------------------------------------------------|-------------------------------------------------------------------------------------------------------------------------------|-----------------------------------------------------------------------------------------------------------------|
| Minkowski, Karen<br>retired geographer<br>United States of America (the)                                                                                         | Miño, Carolina Isabel<br>Researcher<br>Instituto de Biología Subtropical, Nodo Iguazú,<br>UNaM/CONICET<br>Argentina           | MINOS, GEORGE<br>Associate Professor<br>Alexander Technological Educational Institute<br>Thessaloniki<br>Greece |
| Minteguiaga, Manuel A.<br>Research Assistant. Chemistry<br>Faculty of Chemistry, University of the Republic<br>Uruguay                                           | Miot, Elliott<br>PhD student in medical entomology<br>Institut Pasteur du Laos<br>France                                      | Miquelutti, Maria Amelia<br>Post-doctoral physiotherapist<br>University of Campinas<br>Brazil                   |
| Mira, Eleonore<br>Botanical conservatory<br>Guadeloupe                                                                                                           | mirabdullayev, iskandar *<br>prof. zoology<br>national university of uzbekistan<br>Uzbekistan                                 | Miraglia, Simone<br>Professor<br>UNIFESP<br>Brazil                                                              |
| Miraldo, Andrea<br>Postdoctoral researcher / Biodiversity, Evolutionary<br>Biology, Conservation Biology, Ecology<br>Swedish Museum of Natural History<br>Sweden | Miramontes, Octavio<br>Full-time researcher - Physics<br>UNAM<br>Mexico                                                       | Miramontes, Pedro<br>Professor of Mathematics<br>UNAM<br>Mexico                                                 |
| Miranda, Ana Catarina<br>PhD in Organismal Biology<br>Federal University of Maranhão, Postgraduate Progamme<br>in Biodiversity and Conservation<br>Brazil        | Miranda, José Garcia<br>Faculty/ Physics<br>Universidade Federal da Bahia<br>Brazil                                           | Miranda, Lucilia Souza<br>Postdoctoral researcher<br>University of São Paulo<br>Brazil                          |
| Miranda, Margarida<br>PhD student<br>Faculdade de Farmácia da Universidade de Coimbra<br>Portugal                                                                | Miranda, Nelson<br>Scientific Director<br>Marine Megafauna Foundation<br>Mozambique                                           | Miranda, Paulo<br>Associate Professor of Physics<br>University of Sao Paulo<br>Brazil                           |
| Miranda, Paulo Emilio<br>Professor<br>Coppe - Federal University of Rio de Janeiro<br>Brazil                                                                     | Miranda Toledo, Marcos<br>Biologist<br>Empresa Brasileira de Pesquisa Agropecuária<br>Brazil                                  | Mirasole, Alice<br>Marine Ecologist - post doc<br>University of Palermo<br>Italy                                |
| Miró, Alexandre<br>Biologist<br>Centre for Advanced studies of Blanes (CSIC)<br>Spain                                                                            | Miró Pina, Verónica<br>PhD student<br>Center for Interdisciplinary Research in Biology (CIRB),<br>Collège de France<br>France | mirzaei, khaled<br>PhD, Evolutionary Biology<br>Université catholique de Louvain<br>Belgium                     |
| Mischke, Steffen<br>Professor of Quaternary Geology<br>University of Iceland<br>Iceland                                                                          | Mishler, Brent<br>Professor of Integrative Biology<br>University of California, Berkeley<br>United States of America (the)    | Mishra, Amrit kumar<br>Doctoral Researcher/Marine Ecology<br>University of Plymouth<br>India                    |



|                                                                                                                                                                                        |                                                                                                                                                                 |                                                                                                                                                      |
|----------------------------------------------------------------------------------------------------------------------------------------------------------------------------------------|-----------------------------------------------------------------------------------------------------------------------------------------------------------------|------------------------------------------------------------------------------------------------------------------------------------------------------|
| Mishra, Ashish<br>Geosciences<br>James Cook University<br>Australia                                                                                                                    | Mishra, Satya narain<br>Associate Professor Mathematics<br>Brahmanand PG College, Kanpur<br>India                                                               | Missagia, Caio<br>Doctoral Researcher, Ecology and Evolution<br>Universidade do Estado do Rio de Janeiro (Rio de Janeiro State University)<br>Brazil |
| Mistretta Pires, Mathias<br>Postdoctoral researcher<br>São Paulo University<br>Brazil                                                                                                  | Mitchard, Edward<br>Senior Lecturer, Geosciences<br>University of Edinburgh<br>United Kingdom of Great Britain and Northern Ireland (the)                       | Mitchell, Andrew<br>Founder Director, Global Canopy Programme, Oxford<br>United Kingdom of Great Britain and Northern Ireland (the)                  |
| Mitchell, Andrew<br>Founder Director, Global Canopy Programme, Oxford, UK & Co-Founder, Natural Capital Finance Alliance<br>United Kingdom of Great Britain and Northern Ireland (the) | Mitchell, Duncan<br>Emeritus Professor, Conservation physiology<br>University of the Witwatersrand, Johannesburg<br>South Africa                                | Mitchell, Edward<br>Full Professor, Soil Biodiversity<br>University of Neuchâtel<br>Switzerland                                                      |
| Mitchell, Euan<br>Lecturer, Geology<br>Miami University<br>United States of America (the)                                                                                              | Mitchell, Harold<br>Ecologist<br>United States of America (the)                                                                                                 | Mitchell, Joseph *<br>Visiting Research Scientist<br>Florida Museum of Natural History<br>United States of America (the)                             |
| Mitchell, Joseph<br>visiting research scientist<br>University of Florida<br>United States of America (the)                                                                             | Mitchell, Nicola<br>Senior Lecturer, Conservation Physiology<br>The University of Western Australia<br>Australia                                                | Mitchell, Patrick<br>Plant scientist<br>Mitchell<br>Australia                                                                                        |
| Mitchell, Randall<br>Professor of Biology<br>University of Akron<br>United States of America (the)                                                                                     | Mitra, Chandana<br>Associate Professor<br>Auburn University<br>United States of America (the)                                                                   | Mitson, Catherine<br>MSc by Research in Biological Research<br>University of Exeter<br>United Kingdom of Great Britain and Northern Ireland (the)    |
| Mittelhauser, Jennifer<br>Biology Instructor<br>University of Central Missouri<br>United States of America (the)                                                                       | Mittermeier, John<br>PhD student, School of Geography and the Environment<br>University of Oxford<br>United Kingdom of Great Britain and Northern Ireland (the) | Mix, Alan<br>Distinguished Professor of Earth, Ocean, & Atmospheric Sciences<br>Oregon State University<br>United States of America (the)            |
| Miyagishima, Danielle<br>MD-PhD Student<br>Yale School of Medicine/Yale Graduate School of Arts and Sciences<br>United States of America (the)                                         | Miyaki, Cristina<br>Associate Professor<br>Instituto de Biociencias, Universidade de Sao Paulo<br>Brazil                                                        | Mjaja, Sboniso<br>M.Sc Candidate in Plant Ecophysiology<br>University of KwaZulu-Natal<br>South Africa                                               |

|                                                                                                                                                                        |                                                                                                                  |                                                                                                                            |
|------------------------------------------------------------------------------------------------------------------------------------------------------------------------|------------------------------------------------------------------------------------------------------------------|----------------------------------------------------------------------------------------------------------------------------|
| Mo, Giulia<br>Researcher<br>ISPRA<br>Italy                                                                                                                             | Moakley, Robert<br>United States of America (the)                                                                | Moallem, Mino<br>Professor<br>UC Berkeley<br>United States of America (the)                                                |
| Mobiglia, Massimo<br>Teacher and researcher<br>SUPSI<br>Switzerland                                                                                                    | Mobley, Jason<br>Biologist<br>AQUASIS - Associação de Pesquisa e Preservação de Ecossistemas Aquáticos<br>Brazil | Mochán, W Luis<br>Prof.<br>Universidad Nacional Autónoma de México<br>Mexico                                               |
| Möckel, Stefan<br>legal scientist<br>Helmholtz Centre for Environmental Research<br>Germany                                                                            | Moeller, Joseph<br>Mathematics<br>University of California, Riverside<br>United States of America (the)          | Moen, Jon<br>Professor in Ecology<br>Umeå University<br>Sweden                                                             |
| Mogg, Andrew<br>PDRA Scientific diving and coral reef ecology<br>Scottish Association for Marine Science<br>United Kingdom of Great Britain and Northern Ireland (the) | Mohamed, Azlan<br>Scientist<br>Leibniz Institute for Zoo and Wildlife Research<br>Germany                        | Mohamed, Maesha<br>Maldives                                                                                                |
| Mohammadi-Aragh, Mahdi<br>Postdoc / Climate Dynamics<br>Alfred Wegener Institute<br>Germany                                                                            | Mohammed, Alshabrawy<br>Marine Environmental Consultant<br>ESCO, KSA<br>Saudi Arabia                             | Mohammed, Munef<br>Associate Professor<br>Sana'a University<br>Yemen                                                       |
| Mohren, Frits<br>Professor of Forest Ecology and Forest Management<br>Wageningen University<br>Netherlands (the)                                                       | Moinet, Marie<br>DVM, MSC, PhD candidate<br>Massey University<br>New Zealand                                     | Mokkapati, Jaya Sravanthi<br>Doctoral student<br>Jagiellonian University<br>Poland                                         |
| Mol, Jan<br>Professor of Aquatic ecology<br>Anton de Kom University of Suriname<br>Suriname                                                                            | Moldowan, Patrick<br>PhD Student, Ecology & Evolutionary Biology<br>University of Toronto<br>Canada              | Moldzio, Stephan<br>Diplom Biologe / Biologische Meereskunde<br>Reef Check<br>Germany                                      |
| Molenaar, Willem<br>Landscape ecologist<br>Bureau Molenaar<br>Netherlands (the)                                                                                        | Molento, Carla<br>Professor/Animal welfare<br>Federal University of Parana<br>Brazil                             | Moleón, Marcos<br>Department of Zoology, University of Granada<br>Spain                                                    |
| Molepo, Mokgatla<br>Ornithology<br>Nelson Mandela University<br>South Africa                                                                                           | Molina, Ana<br>Research botanist<br>University of Leon<br>Spain                                                  | Molina, Erina Pauline<br>MS Student, Environmental Science<br>University of the Philippines - Diliman<br>Philippines (the) |

|                                                                                                                                          |                                                                                                                           |                                                                                                                                                                                            |
|------------------------------------------------------------------------------------------------------------------------------------------|---------------------------------------------------------------------------------------------------------------------------|--------------------------------------------------------------------------------------------------------------------------------------------------------------------------------------------|
| Molina, Flavio de Barros<br>Professor of Ecology and Zoology<br>Universidade Santo Amaro<br>Brazil                                       | Molina, Gonzalo AR<br>Biologist (PhD)<br>IFEVA/CONICET - Facultad de Agronomía - Universidad de Buenos Aires<br>Argentina | Molina, Isabel<br>Proffesor<br>Biology Department. Universidad Autónoma de Madrid<br>Spain                                                                                                 |
| Molina, Serena<br>Spain                                                                                                                  | Molina-Burgos, Blanca E. *<br>Marine Biologist<br>Universidad Andres Bello<br>Chile                                       | Molina-Freaner, Francisco<br>Researcher; Geology/Ecology<br>Instituto de Geología, Universidad Nacional Autónoma de México<br>Mexico                                                       |
| Molina-Henao, Y. Franchesco<br>Evolutionary Biologist<br>Harvard University<br>United States of America (the)                            | Molina-Montenegro, Marco<br>Full Professor / Ecology<br>Universidad de Talca<br>Chile                                     | Molinari, bianca<br>Griffith University<br>Australia                                                                                                                                       |
| Molinari, Jesús<br>Ecology and zoology<br>Universidad de Los Andes<br>Venezuela (Bolivarian Republic of)                                 | Molinas-González, Carlos Rubén<br>PhD student<br>Universidad de Granada<br>Spain                                          | Molina-Venegas, Rafael<br>Postdoctoral researcher<br>Institute of Plant Scinces<br>Switzerland                                                                                             |
| Moliner Cachazo, Luis<br>Research Technician<br>Imperial College of London<br>United Kingdom of Great Britain and Northern Ireland (the) | Molineri, Carlos<br>Senior Researcher, Biology<br>Instituto de Biodiversidad Neotropical - CONICET-UNT<br>Argentina       | Molineri, Jon<br>Stream ecologist<br>Escuela de Gestión Ambiental, Pontificia Universidad Católica del Ecuador Sede Esmeraldas, Espejo y Subida a Santa Cruz, 080150 Esmeraldas<br>Ecuador |
| Molino, Jean-François<br>Senior scientist<br>IRD<br>France                                                                               | Molino, João Vitor<br>PhD<br>Brazil                                                                                       | Mollá, Salvador<br>Associate Professor<br>Department of Ecology. Universidad Autónoma de Madrid<br>Spain                                                                                   |
| Möller, Klas Ove<br>PostDoc Biological Oceanography<br>Institute of Coastal Research, Helmholtz-Zentrum Geesthacht<br>Germany            | Mollet, Pierre<br>Forest Conservation Manager<br>Switzerland                                                              | Mollicone, Danilo<br>Climate and Land Officer<br>Food and Agriculture Organization of the United Nations<br>Italy                                                                          |
| Molodenskiy, Dmitry<br>Postdoc/Molecular Biology<br>EMBL<br>Russian Federation (the)                                                     | Moloney, James<br>Adjunct Lecturer, College of Science and Engineering<br>James Cook University<br>Australia              | Molyneux, Jenny<br>Environmental science<br>Charles Darwin University<br>Australia                                                                                                         |

|                                                                                                                              |                                                                                                                                             |                                                                                                                                                           |
|------------------------------------------------------------------------------------------------------------------------------|---------------------------------------------------------------------------------------------------------------------------------------------|-----------------------------------------------------------------------------------------------------------------------------------------------------------|
| Momigliano, Paolo<br>Postdoctoral Researcher, Evolutionary genomics<br>University of Helsinki<br>Finland                     | Monaco, Cristián<br>Postdoctoral researcher<br>Rhodes University<br>South Africa                                                            | Monageng, Nathan Paul<br>Social and Environmental Specialist<br>Norsad Finance Limited<br>Botswana                                                        |
| Monaghan, Michael T.<br>Senior Scientist<br>Leibniz Institute of Freshwater Ecology and Inland<br>Fisheries (IGB)<br>Germany | Monceau, Karine<br>Lecturer<br>Université de La Rochelle<br>France                                                                          | Mondain-Monval, Jean-Yves<br>research engineer in Wildlife management and<br>conservation<br>ONCFS<br>France                                              |
| Mondav, Rhiannon<br>Microbial ecology<br>Uppsala University<br>Sweden                                                        | Mondet, Boris<br>PhD candidate in Engineering Acoustics<br>DTU Electrical Engineering<br>Denmark                                            | Mondet, Fanny<br>INRA<br>France                                                                                                                           |
| Mondon, Julie *<br>Ecotoxicologist<br>Deakin University<br>Australia                                                         | Moner-Girona, Magda<br>Researcher/Energy consultant<br>European Commission<br>Italy                                                         | Monica, Garcia-Bañuelos<br>CIAD (Centro de Investigación en Alimentación y<br>Desarrollo, A.C.)<br>Mexico                                                 |
| Monir, Suzanne<br>Science Educator/Chemist<br>Villanova College<br>Canada                                                    | Monismith, Stephen<br>Professor of Civil and Env. Eng.<br>Stanford University<br>United States of America (the)                             | Monjeau, Adrian<br>Director Department of Complex Systems<br>Fundacion Bariloche & CONICET<br>Argentina                                                   |
| Monné, Marcela<br>Professor<br>Museu Nacional, Universidade Federal do Rio de Janeiro<br>Brazil                              | Monnens, Marlies<br>PhD student<br>Hasselt University<br>Belgium                                                                            | Monnin, Thibaud<br>DR<br>CNRS / Université Pierre et Marie Curie - Paris 6<br>France                                                                      |
| MONNOT, Catherine<br>Research - Experimental Medicine<br>INSERM<br>France                                                    | Monosson, Emily<br>Toxicologist and Writer<br>Ronin Institute for Independent Scholarship<br>United States of America (the)                 | Monros, Juan<br>Assistant Professor of Ecology<br>University of Valencia<br>Spain                                                                         |
| Monroy-Rios, Emiliano<br>PhD Student<br>Northwestern University<br>United States of America (the)                            | Monsarrat, Sophie<br>Postdoctoral Research Fellow<br>Centre for African Conservation Ecology - Nelson<br>Mandela University<br>South Africa | Monshausen, Gabriele<br>Associate Professor of Biology<br>Pennsylvania State University<br>United States of America (the)                                 |
| Montagna, Tiago<br>PhD Student<br>Universidade Federal de Santa Catarina<br>Brazil                                           | Montagne, J.P.<br>Conservation Ecologist<br>San Diego Zoo Global<br>United States of America (the)                                          | Montanheiro Paolino, Roberta<br>PhD student of Applied Ecology<br>Universidade de São Paulo - Escola Superior de<br>Agricultura Luiz de Queiroz<br>Brazil |

|                                                                                                                                    |                                                                                                                                                     |                                                                                                                                                       |
|------------------------------------------------------------------------------------------------------------------------------------|-----------------------------------------------------------------------------------------------------------------------------------------------------|-------------------------------------------------------------------------------------------------------------------------------------------------------|
| Monteiro, Antonia<br>Biologist<br>National University of Singapore<br>Singapore                                                    | Monteiro, Erison Carlos dos Santos<br>PhD Student<br>State University of São Paulo- UNESP<br>Brazil                                                 | Monteiro, Ilza<br>Associate Professor<br>University of Campinas<br>Brazil                                                                             |
| Monteiro, Paulo<br>Researcher - Ph.D.<br>Butantan Institute<br>Brazil                                                              | Monteiro de Almeida-Rocha, Juliana<br>Applied Ecology and Conservation Lab, State University of<br>Santa Cruz<br>Brazil                             | Monteiro de Lima Demange, Lia Helena<br>PhD Candidate<br>Institute of Energy and Environment of the University of<br>São Paulo<br>Brazil              |
| Monteiro Gomes, Guilherme<br>PhD in Neuroscience<br>Brazil                                                                         | Monteith, Geoffrey<br>Research Associate (retired Senior Curator of Insects)<br>Queensland Museum<br>Australia                                      | Montenegro, Olga<br>Associate Professor in Wildlife Ecology and Conservation<br>Universidad Nacional de Colombia<br>Colombia                          |
| Monteale Gavazzi, Giacomo<br>PhD<br>Royal Belgian Institute of Natural Sciences<br>Belgium                                         | Montero Serra, Ignasi<br>PhD Candidate<br>Department of Ecology, University of Barcelona<br>Spain                                                   | Montero-López, M <sup>a</sup> del Pilar<br>Profesora del Departamento de Biología. Facultad de<br>Ciencias<br>Universidad Autónoma de Madrid<br>Spain |
| Montesinos, Daniel<br>Researcher / Ecology<br>Centre for Functional Ecology - University of Coimbra<br>Portugal                    | Monteux, Sylvain<br>PhD student, microbial ecology<br>Umeå University<br>Sweden                                                                     | Montgomery, W. Linn<br>Professor<br>Northern Arizona University<br>United States of America (the)                                                     |
| Monticelli, Patricia Ferreira<br>Professor<br>Faculdade de Filosofia, Ciências e Letras da USP de<br>Ribeirão Preto<br>Brazil      | Montoya, Daniel<br>Research fellow<br>Centre for Biodiversity Theory and Modelling, Theoretical<br>and Experimental Ecology Station, CNRS<br>France | Montoya, Isabel<br>Marine and coastal geology<br>Universidad de Las Palmas de Gran Canaria<br>Spain                                                   |
| Montoya, José V.<br>Researcher<br>Instituto Venezolano de Investigaciones Científicas (IVIC)<br>Venezuela (Bolivarian Republic of) | Montoya-Lerma, James<br>Associate Professor<br>Universidad del Valle<br>Colombia                                                                    | Montserrat Larrosa, Marta<br>Tenured scientist<br>Spanish National Research Council<br>Spain                                                          |
| Monzon, Javier<br>Ecologist<br>Pepperdine University<br>United States of America (the)                                             | Moody, Jennie<br>Research Associate Professor, Environmental Sciences<br>UVA<br>United States of America (the)                                      | Moody, Scott M<br>Assoc Professor Organismic and Evolutionary Biology<br>Ohio University<br>United States of America (the)                            |

|                                                                                                                                                           |                                                                                                                                                            |                                                                                                                                                         |
|-----------------------------------------------------------------------------------------------------------------------------------------------------------|------------------------------------------------------------------------------------------------------------------------------------------------------------|---------------------------------------------------------------------------------------------------------------------------------------------------------|
| Moody, Suzy Clare<br>Research Microbiologist<br>Swansea University<br>United Kingdom of Great Britain and Northern Ireland (the)                          | Mooers, Arne<br>Professor of Biodiversity<br>Simon Fraser University<br>Canada                                                                             | Mooi, Randall<br>Curator of Zoology<br>The Manitoba Museum<br>Canada                                                                                    |
| Moonen, Anna-Camilla<br>Assistant Professor in Agronomy and Field Crops<br>Institute of Life Sciences, Scuola Superiore Sant'Anna di Pisa<br>Italy        | Mooney, Kailen<br>Professor, Ecology & Evolutionary Biology<br>University of California, Irvine<br>United States of America (the)                          | Mooney, Karen<br>Macroalgal Postdoctoral Research Assistant<br>Queen's University Belfast<br>United Kingdom of Great Britain and Northern Ireland (the) |
| Moor, Helen<br>Ecologist<br>Swedish University of Agricultural Sciences<br>Sweden                                                                         | Moorais, Zilda<br>Associate Professor of Organic Chemistry and Bromatology<br>Egas Moniz Cooperativa de Ensino Superior CRL<br>Portugal                    | Moore, Abigail<br>PhD Student in Fisheries Science<br>Hasanuddin University<br>Indonesia                                                                |
| Moore, Glenn<br>Curator of Fishes<br>Western Australian Museum<br>Australia                                                                               | Moore, Jared<br>Master's Researcher, Mangrove Ecology<br>National University of Singapore<br>Singapore                                                     | Moore, Jenna<br>Invertebrate Zoology<br>United States of America (the)                                                                                  |
| Moore, Karen<br>Molecular Biologist<br>University of Exeter<br>United Kingdom of Great Britain and Northern Ireland (the)                                 | Moore, Nathan<br>Associate Professor, Geography<br>Michigan State University<br>United States of America (the)                                             | Moore-Barkus, Autumn<br>Environmental, Health & Safety<br>United States of America (the)                                                                |
| Moores, Eldridge<br>Distinguished Professor Emeritus of Earth and Planetary Sciences<br>University of California, Davis<br>United States of America (the) | Moorhouse, Tom<br>Post doctoral researcher, Ecology and Conservation<br>University of Oxford<br>United Kingdom of Great Britain and Northern Ireland (the) | Mooshammer, Maria<br>PostDoc<br>University of Vienna<br>Austria                                                                                         |
| Mor, Jordi-René<br>PhD student, freshwater ecologist<br>Catalan Institute for Water Research (ICRA)<br>Spain                                              | Mora, Camilo<br>Professor<br>University of Hawaii<br>United States of America (the)                                                                        | mora heredia, enrique<br>Researcher, Limnology, aquatic ecology, water quality<br>Instituto de Ecología A.C.<br>Mexico                                  |
| Moraes, Bruno<br>Master in Ecology / Science Journalist<br>Campinas State University (Unicamp)<br>Brazil                                                  | Moraes, Luiz Roberto Santos<br>Professor in Environmental Sanitation<br>Universidade Federal da Bahia/Federal University of Bahia<br>Brazil                | Moraes-Barros, Nadia<br>Researcher, Conservation Genetics<br>CIBIO-InBIO, University of Porto<br>Portugal                                               |

|                                                                                                         |                                                                                                  |                                                                                                                                               |
|---------------------------------------------------------------------------------------------------------|--------------------------------------------------------------------------------------------------|-----------------------------------------------------------------------------------------------------------------------------------------------|
| Morais, Paula<br>Associate Professor / Microbiologist<br>Universidade Federal do Tocantins<br>Brazil    | Morais Vidal, Mariana<br>Postdoctoral researcher<br>Universidade de São Paulo<br>Brazil          | Morales, Carlos<br>PhD student in Physics<br>Universidad Autónoma de Madrid<br>Spain                                                          |
| Morales, Eduardo A.<br>Postdoc Ecology<br>Universidade da Évora<br>Portugal                             | Morales, Hernan<br>Evolutionary Biologist<br>Gothenburg University<br>Sweden                     | Morales, Jesus<br>Conservation Biologist<br>Provita<br>Venezuela (Bolivarian Republic of)                                                     |
| Morales, Manuel B.<br>Assistant Profesor of Ecology<br>Autónoma University of Madrid<br>Spain           | Morales, Patricia<br>Visiting Prof.<br>University of Leuven<br>Argentina                         | Morales Yokobori, Marcelo Lino<br>Adjunct Professor of Ecology and Conservation / Marine<br>Resources<br>Universidad de Belgrano<br>Argentina |
| Morales-Castilla, Ignacio<br>Research Associate<br>Harvard University<br>United States of America (the) | Morales-Jimenez, Alba<br>Primatologist<br>Fundacion BioDiversa Colombia<br>Colombia              | Morales-Reyes, Zebensui<br>Department of Applied Biology<br>Universidad Miguel Hernández<br>Spain                                             |
| Morales-Romero, Daniel<br>Profesor Investigador<br>Universidad Estatal de Sonora<br>Mexico              | Moran, Catherine<br>Ecologist<br>Australia                                                       | Moran, Emily<br>Assistant Professor (forest ecology & genetics)<br>UC Merced<br>United States of America (the)                                |
| Moran, Joseph<br>Principal Investigator and Assistant Professor<br>University of Strasbourg<br>France   | Moran, Kate<br>President & CEO & Professor<br>Ocean Networks Canada, Univ. of Victoria<br>Canada | Morán, M.Asunción<br>Retired Genetics university lecturer<br>Universidad Autónoma de Madrid<br>Spain                                          |
| Morana, Cedric<br>Biogeochemist<br>KULeuven<br>Belgium                                                  | Morand, Serge<br>Health Ecology<br>CNRS Université de Montpellier<br>France                      | Morandi, Paulo<br>Post doctoral<br>Universidade do Estado de Mato Grosso<br>Brazil                                                            |
| Morandin, Claire<br>Postdoctoral researcher<br>University of Helsinki<br>Finland                        | Morandini, Marina<br>PhD Student<br>University of Arizona<br>United States of America (the)      | Morando, Mariana<br>Researcher and Proffesor<br>IPEEC-CONICET and Universidad Nacional de la Patagonia<br>San Juan Bosco<br>Argentina         |
| Morante-Filho, Jose Carlos<br>Visiting Professor<br>Universidade Estadual de Santa Cruz<br>Brazil       | Moraru, Gail Miriam<br>Biology Instructor<br>United States of America (the)                      | Moraza, María L.<br>Professor<br>Universidad de Navarra<br>Spain                                                                              |

|                                                                                                                                                                                                  |                                                                                                                                                 |                                                                                                                                |
|--------------------------------------------------------------------------------------------------------------------------------------------------------------------------------------------------|-------------------------------------------------------------------------------------------------------------------------------------------------|--------------------------------------------------------------------------------------------------------------------------------|
| Morcillo, Luna<br>Junior Researcher<br>CEAM Foundation<br>Spain                                                                                                                                  | More, Elisabet<br>PhD Student, Medicine and Animal Health<br>IRTA-CReSA<br>Spain                                                                | Moreau, Inès<br>Post-Doc in Earth Observation<br>Université catholique de Louvain (UCL - Geomatics)<br>Belgium                 |
| Moreau, Robert<br>Faculty/Staff - Interdisciplinary Environmental Studies<br>Southeastern Louisiana University - Turtle Cove<br>Environmental Research Station<br>United States of America (the) | Moreira, Ana Paula<br>Researcher<br>Federal Institute of Rio de Janeiro UFRJ<br>Brazil                                                          | Moreira, Felipe<br>Technologist in Public Health<br>Fundação Oswaldo Cruz<br>Brazil                                            |
| Moreira, Jasmine<br>professor<br>Ponta Grossa State University<br>Brazil                                                                                                                         | Moreira, Renato Soares<br>Biólogo mestre em Biodiversidade Ecologia e Conservação<br>ODS - Organização De Desenvolvimento Sustentável<br>Brazil | Moreira, Silvia<br>Veterinarian<br>Instituto Estadual do Ambiente<br>Brazil                                                    |
| Moreira, Thiago *<br>Brazil                                                                                                                                                                      | Morel-Journal, Thibaut<br>Postdoctoral Fellow<br>Université Catholique de Louvain<br>Belgium                                                    | Morellato, Patricia<br>Professor<br>UNESP<br>Brazil                                                                            |
| Morelli, Chiara<br>PhD student - Neuroscience<br>EMBL<br>Italy                                                                                                                                   | Moreno, Almudena<br>Universidad Autónoma de Madrid<br>Spain                                                                                     | Moreno, Cristhian<br>MSC Ecology<br>Ecuador                                                                                    |
| Moreno, Esteban<br>Spain                                                                                                                                                                         | MORENO, HUGO<br>SCIENTIFIC SPACE RESEARCH. DIRECTOR.<br>MEXICAN SPACE AGENCY<br>Mexico                                                          | Moreno, Iñigo<br>PhD Student / Ecotoxicology<br>University of the Basque Country<br>Spain                                      |
| Moreno, Jose Luis<br>Professor, Limnology<br>University of Castilla-La Mancha<br>Spain                                                                                                           | Moreno, José M.<br>Professor of Ecology<br>University of Castilla-La Mancha<br>Spain                                                            | Moreno, Juan *<br>Research Professor<br>CSIC<br>Spain                                                                          |
| Moreno, Karen<br>Auxiliar Professor, Paleobiology<br>Universidad Austral de Chile<br>Chile                                                                                                       | Moreno, Luís<br>Assistant Professor / Geography & Spatial Planning<br>University of Lisbon<br>Portugal                                          | Moreno, S. Andrea<br>Biochemistry and neurosciences<br>Universidad de Los Andes<br>Venezuela (Bolivarian Republic of)          |
| Moreno de Sousa, João Carlos<br>Archaeologist<br>PPGARq, Museu Nacional, Universidade Federal do Rio de Janeiro<br>Brazil                                                                        | Moreno Lampreave, Diego<br>Marine Biologist<br>Agencia Medio Ambiente y Agua de Andalucía<br>Spain                                              | Moreno Mateos, David<br>Ikerbasque Research Fellow. Conservation biologist.<br>Basque Centre for Climate Cahnge - BC3<br>Spain |



|                                                                                                                                   |                                                                                                                                                    |                                                                                                                                               |
|-----------------------------------------------------------------------------------------------------------------------------------|----------------------------------------------------------------------------------------------------------------------------------------------------|-----------------------------------------------------------------------------------------------------------------------------------------------|
| Moreno-Baez, Marcia<br>Research Associate<br>University of New England<br>United States of America (the)                          | Moreno-Jiménez, Eduardo<br>Agricultural Chemistry<br>Universidad Autónoma de Madrid<br>Spain                                                       | Moreno-Navarro, Juan José<br>Full Professor<br>Universidad Politécnica de Madrid<br>Spain                                                     |
| Moreno-Rueda, Gregorio<br>professor<br>Universidad de Granada<br>Spain                                                            | Moreno-Saiz, Juan Carlos<br>Assistant Professor of Botany<br>Universidad Autónoma de Madrid<br>Spain                                               | Morero, Natalia<br>Biological Chemistry<br>EMBL<br>Germany                                                                                    |
| Moresco, Carina<br>Professor/ Botany and Ecology<br>Brazil                                                                        | Moretti, Eduardo<br>Postdoctoral<br>University of São Paulo<br>Brazil                                                                              | Moretti, Marcelo<br>Freshwater Professor/Researcher<br>University of Vila Velha<br>Brazil                                                     |
| Moretti, Marco<br>Senior Reseracher<br>Swiss Federal Research Institute<br>Switzerland                                            | Moretti, Simone<br>PhD student in Climate history & Paleoceanography<br>Max Planck Institute for Chemistry<br>Germany                              | Moretzsohn, Fabio<br>Professional Assistant Professor, Invertebrates<br>Texas A&M University-Corpus Christi<br>United States of America (the) |
| Morewood, William Dean<br>Scientific Evaluation Officer, Entomology<br>Health Canada, Pest Management Regulatory Agency<br>Canada | Morgan, Alexia<br>United States of America (the)                                                                                                   | Morgan, Dr. Donald<br>Physics--Retired<br>University of St. Mary's/Minnesota<br>United States of America (the)                                |
| Morgan, Ray<br>Animal ecologist<br>UMCES-AL<br>United States of America (the)                                                     | Morgan, Rhys<br>Animal care technician. Biological sciences.<br>Bangor University<br>United Kingdom of Great Britain and Northern Ireland<br>(the) | Morgan, William<br>PhD in student in ecology<br>University of Aberdeen<br>United Kingdom of Great Britain and Northern Ireland<br>(the)       |
| Morgan, William<br>Professor<br>College of Wooster<br>United States of America (the)                                              | Morgan, Xochitl<br>Environmental Microbiology<br>The University of Otago<br>New Zealand                                                            | Morgans, Courtney<br>PhD Candidate, Conservation Ecology<br>University of Queensland<br>Australia                                             |
| Morgenstern, Olaf<br>Climate and ozone scientist<br>New Zealand                                                                   | Morgenstern, Robert<br>scientist in ecological research<br>Leibniz-Institute of freshwater ecology and inland<br>fisheries<br>Germany              | Mori, Scott<br>United States of America (the)                                                                                                 |
| Moriani Siniscalchi, Carolina<br>PhD Candidate: Botany<br>Universidade de São Paulo<br>Brazil                                     | Morien, Evan<br>Microbial Ecology<br>University of British Columbia<br>Canada                                                                      | Morillo, Jose A.<br>Postdoctoral Reseracher<br>Spanish National Research Council<br>Spain                                                     |

|                                                                                                                                        |                                                                                                                                                                   |                                                                                                                                    |
|----------------------------------------------------------------------------------------------------------------------------------------|-------------------------------------------------------------------------------------------------------------------------------------------------------------------|------------------------------------------------------------------------------------------------------------------------------------|
| Morin, Soizic<br>Researcher, ecotoxicology<br>Irstea<br>France                                                                         | Morin, Xavier<br>Researcher in forest ecology<br>CNRS<br>France                                                                                                   | Morinay, Jennifer<br>PhD student<br>LBBE, University Lyon 1<br>France                                                              |
| Moritz, Craig<br>Professor, Evolutionary Biology<br>The Australian National University<br>Australia                                    | Morley, Craig<br>Associate Professor Resource Management<br>Toi Ohomai Institute of Technology<br>New Zealand                                                     | Morley, Terry<br>Lecturer in Physical Geography<br>NUI Galway<br>Ireland                                                           |
| Mormul, Roger Paulo<br>Professor / Freshwater Ecology<br>State University of Maringá<br>Brazil                                         | Moro, Paulo<br>Professor Adjunto<br>Universidade Estadual de Ponta Grossa<br>Brazil                                                                               | Moro, Rosemeri<br>Senior Researcher<br>Ponta Grossa State University<br>Brazil                                                     |
| Morón López, Jesús<br>PhD student<br>IMDEA Agua<br>Spain                                                                               | Morón Zambrano, Vilisa<br>Research assistant / Conservation Biology<br>Universidad Simón Bolívar<br>Venezuela (Bolivarian Republic of)                            | Morrien, Elly<br>Postdoctoral researcher, Soil ecology<br>University of Amsterdam<br>Netherlands (the)                             |
| Morris, Alvin<br>Retired, Pollution Biology<br>Environmental Protection Agency<br>United States of America (the)                       | Morris, Andrew<br>Ecologist<br>Scottish Environment Protection Agency<br>United Kingdom of Great Britain and Northern Ireland (the)                               | Morris, Jenna<br>Field Ecology Technician<br>Battelle Ecology - NEON Project<br>United States of America (the)                     |
| Morris, Joshua<br>Ocean and coastal resource management<br>The Nature Conservancy<br>United States of America (the)                    | Morris, Michael<br>Environmental Science<br>Environmental Education<br>New Zealand                                                                                | Morris, Robert<br>William & Elsie Prentice Professor of Biology<br>Wheaton College Massachusetts<br>United States of America (the) |
| Morris, Robert<br>Data Scientist<br>The SETI Institute<br>United States of America (the)                                               | Morris, Valerie<br>Professional Research Assistant<br>Institute for Arctic and Alpine Research, University of Colorado, Boulder<br>United States of America (the) | Morrison, Maria<br>International environmental management masters student<br>Canada                                                |
| Morrison, Peter<br>Senior Ecologist<br>Pacific Biodiversity Institute<br>United States of America (the)                                | Morrissey, Corrie *<br>Science Graduate<br>University of Auckland<br>New Zealand                                                                                  | Morrissey, Emma<br>Fisheries Researcher<br>Ireland                                                                                 |
| Morrogh-Bernard, Helen<br>Conservation Biologist<br>University of Exeter<br>United Kingdom of Great Britain and Northern Ireland (the) | Morse, Geoffrey<br>Associate Professor of Biology<br>University of San Diego<br>United States of America (the)                                                    | Morse, Julie<br>Ecologist<br>The Nature Conservancy<br>United States of America (the)                                              |

|                                                                                                                                                      |                                                                                                                                                            |                                                                                                                                 |
|------------------------------------------------------------------------------------------------------------------------------------------------------|------------------------------------------------------------------------------------------------------------------------------------------------------------|---------------------------------------------------------------------------------------------------------------------------------|
| Morselli Gysi, Deisy *<br>Bioinformatics<br>Leipzig University<br>Germany                                                                            | Mortara, Renato<br>Parasitology<br>Escola Paulista de Medicina-UNIFESP<br>Brazil                                                                           | Mortega, Kim Geraldine<br>Biologist<br>Germany                                                                                  |
| mortezapour, marzieh<br>PhD Candidate at Natural Resources and Environmental<br>Science<br>UNBC<br>Canada                                            | Mortimer, Charli<br>PhD candidate in Marine Ecology<br>Victoria University of Wellington<br>New Zealand                                                    | Morton, Olivia<br>Bat Advice Officer<br>Bat Conservation Trust<br>United Kingdom of Great Britain and Northern Ireland<br>(the) |
| Morvidone, Marcela<br>Argentina                                                                                                                      | Mosandl, Reinhard<br>Professor of Silviculture<br>Technical University Munich<br>Germany                                                                   | Moschilla, Joe<br>PhD Candidate<br>University of Western Australia<br>Australia                                                 |
| Moscoso-Sánchez, David<br>Associate Professor / Sociologist<br>Pablo de Olavide University<br>Spain                                                  | Moseby, Katherine<br>Research Fellow<br>University of New South Wales<br>Australia                                                                         | Moser, Christine<br>Assistant Professor Organization Sciences<br>VU Amsterdam<br>Netherlands (the)                              |
| Moses, Kelli<br>International Coordinator of the Sub-Antarctic Biocultural<br>Conservation Program<br>Institute of Ecology and Biodiversity<br>Chile | Mosier, Donald<br>Professor Emeritus<br>The Scripps Research Institute<br>United States of America (the)                                                   | Mosier, Thomas<br>Researcher<br>Climate Context<br>United States of America (the)                                               |
| MOSNIER, Emilie<br>Infectious disease physician<br>Centre Hospitalier de Cayenne<br>French Guiana                                                    | Mosquera, Denis<br>Master student, birds ecology<br>Viena University<br>Ecuador                                                                            | Mosquera, Diego<br>Researcher<br>Tiputini Biodiversity Station - Universidad San Francisco<br>de Quito<br>Ecuador               |
| Mosquera, Teresa<br>Full professor<br>National University of Colombia<br>Colombia                                                                    | Moss, David<br>Honoray Reader in Mathematics - astrophysicist<br>University of Manchester<br>United Kingdom of Great Britain and Northern Ireland<br>(the) | Moss, Robert<br>Ecology<br>United Kingdom of Great Britain and Northern Ireland<br>(the)                                        |
| Mostafa, Hany *<br>Environment and Climate change research institute<br>Egypt                                                                        | Mota, Luísa L.<br>PHD student<br>Universidade Estadual de Campinas<br>Brazil                                                                               | Mota, Mario<br>Assistant Professor in Ecology<br>National Univee<br>United States of America (the)                              |
| Motta, Flávia<br>Bióloga<br>Fiocruz<br>Brazil                                                                                                        | MOTTA MAUES, MARCIA<br>Researcher / Pollination Ecologist<br>Embrapa Eastern Amazon<br>Brazil                                                              | Motte, Grégory<br>Biologist Phd / Nature conservation<br>Belgium                                                                |

|                                                                                                                  |                                                                                                                         |                                                                                                                                          |
|------------------------------------------------------------------------------------------------------------------|-------------------------------------------------------------------------------------------------------------------------|------------------------------------------------------------------------------------------------------------------------------------------|
| Mougeot, Francois<br>Cientifico Titular del CSIC<br>IREC (CSIC-UCLM-JCCM)<br>Spain                               | Moulds, Max<br>Entomologist<br>Australian Museum<br>Australia                                                           | Moullec, Fabien<br>PhD Student<br>UMR MARine Biodiversity, Exploitation and Conservation<br>(MARBEC) (IRD, CNRS, IFREMER, UM)<br>France  |
| Moulton, Timothy<br>Associate Professor, Ecology<br>Universidade do Estado do Rio de Janeiro<br>Brazil           | Mountjoy, Joshu<br>Marine Geologist<br>National Institute for Water and Atmospheric Research<br>New Zealand             | Mouquet, Nicolas<br>Director of Research<br>Centre National de la Recherche Scientifique<br>France                                       |
| Moura, Catarina<br>Ecology<br>Portugal                                                                           | Moura, Ciro<br>Technical advisor<br>INEA<br>Brazil                                                                      | Moura, Claudio<br>Researcher, Master of science/Management of<br>Conservation Units<br>Forest Institute of the São Paulo State<br>Brazil |
| Moura, Yhasmin<br>Brazil                                                                                         | Moura Costa, Pedro<br>Director<br>BVRio Environmental Exchange<br>Brazil                                                | Moura Da Costa, Fábio<br>Biologist<br>Museum of Science of Nature, Universidade de Caxias do<br>Sul<br>Brazil                            |
| Moura de Faria, Gabriel Messias<br>Research<br>Independent<br>Brazil                                             | Mousseau, Timothy<br>Professor of Biological Sciences<br>University of South Carolina<br>United States of America (the) | Moutailler, Sara *<br>Researcher<br>ANSES<br>France                                                                                      |
| Moutinho, Paulo<br>Senior Scientist<br>Amazon Environmental Research Institute<br>Brazil                         | Mouton, Anna<br>Veterinary pathologist<br>Amanzi Biosecurity<br>South Africa                                            | Mouton, Elna<br>Professor in New Testament<br>Stellenbosch University<br>South Africa                                                    |
| Moya Jimenez, Maria Rosario<br>PhD student<br>Consejo Superior Investigaciones Cientificas<br>Spain              | Moya-Laraño, Jordi<br>Tenure Scientist - Ecology<br>Estación Experimenta de Zonas Áridas - CSIC<br>Spain                | Moyers, Sahnzi<br>Biology<br>Virginia Tech<br>United States of America (the)                                                             |
| Mozzi, Paolo<br>Assistant Professor in Physical Geography and<br>Geomorphology<br>University of Padova<br>Italy  | Mramor, Neza<br>professor of mthematics<br>University of Ljubljana<br>Slovenia                                          | Msimango, Thabang<br>Msc Student (Biotechnology)<br>Univeristy of Pretoria<br>South Africa                                               |
| Mtz Gonzalez-Tablas, Angel<br>catedrático de universidad/ Economía<br>Universidad Complutense de Madrid<br>Spain | Muambalo, Kisimenda *<br>Researcher and Curator<br>Natural History Museum<br>Mozambique                                 | Muanis, Manoel<br>Ph.D. Ecology<br>UFRJ<br>Brazil                                                                                        |

|                                                                                                                                  |                                                                                                                                                   |                                                                                                                                    |
|----------------------------------------------------------------------------------------------------------------------------------|---------------------------------------------------------------------------------------------------------------------------------------------------|------------------------------------------------------------------------------------------------------------------------------------|
| Mubarrok, Saat<br>Junior Researcher of Oceanography<br>Mulawarman University, Samarinda<br>Indonesia                             | Mubi Brighenti, Andrea<br>Social Theory<br>Università di Trento<br>Italy                                                                          | Mucciolo, Serena<br>PhD candidate<br>Universidade Federal do Paraná<br>Brazil                                                      |
| Muchailh, Mariese<br>Director forestry restauration<br>Iap<br>Brazil                                                             | Muchowska, Kamila<br>Postdoctoral Research Assistant, Chemistry<br>Institut de Science et d'Ingénierie Supramoléculaires,<br>Strasbourg<br>France | Mudd, Gavin<br>Associate Professor- Environmental Engineering<br>RMIT University<br>Australia                                      |
| Mudde, Laura<br>PhD Hisotry and Sociology<br>University of British Columbia<br>Netherlands (the)                                 | Muelbert, Jose H<br>Professor<br>Instituto de Oceanografia - Universidade Federal do Rio<br>Grande<br>Brazil                                      | Mueller, Miriam S.<br>Postgraduate Student Marine Biology<br>National Autonomous University of Mexico (UNAM)<br>Mexico             |
| Muheim, Rachel<br>Biology<br>Lund University<br>Sweden                                                                           | Mühldorfer, Kristin<br>Scientist / Veterinary Microbiologist<br>Leibniz Institute for Zoo and Wildlife Research<br>Germany                        | Muilwijk, Morven<br>PhD Candidate Physical Oceanography<br>University of Bergen, Bjerknes Center for Climate<br>Research<br>Norway |
| Muir, Barry<br>Ecologist, Environmental Consultant - retired<br>Muir Environmental<br>Australia                                  | Mujica, Maria<br>Diplomat<br>Paraguay                                                                                                             | MUKANDANGA, Josee *<br>Project officer<br>FxB<br>Rwanda                                                                            |
| Mukherjee, Shomita<br>Principal Scientist, Conservation Biology<br>Salim Ali Centre for Ornithology and Natural History<br>India | Mukherjee, Vaskar<br>Post-doctoral researcher, Functional Genomics<br>University of Gothenburg<br>Sweden                                          | Mukiibi, Alex<br>Agriculturalist<br>University of Pretoria<br>South Africa                                                         |
| MUKUBU PIKA, Léa<br>Urban Ecology<br>University of Kinshasa (DRC)<br>Congo (the Democratic Republic of the)                      | Mukul, Sharif Ahmed<br>Assistant Professor, Department of Environmental<br>Management<br>Independent University Bangladesh<br>Bangladesh          | Mulder, Christa<br>Professor of Ecology<br>University of Alaska Fairbanks<br>United States of America (the)                        |
| Mulder, Eridani<br>Wildlife Ecologist<br>Australian Wildlife Conservancy<br>Australia                                            | Mulder, Karel<br>Professor Urban Metabolism<br>The Hague University of Applied Science<br>Netherlands (the)                                       | Muldrow Jr., PhD, Milton<br>Chair, Environmental Science and Policy<br>Wilmington University<br>United States of America (the)     |
| Mulhouse, John<br>Plant Ecologist<br>University of New Mexico<br>United States of America (the)                                  | Mulieri, Pablo<br>Researcher/Biology<br>CONICET<br>Argentina                                                                                      | Mulkey, Stephen<br>Program Officer<br>NSF<br>United States of America (the)                                                        |

\* indicates individual also signed 1992 Scientists' Warning to Humanity

|                                                                                                                                                                                               |                                                                                                                                               |                                                                                                                               |
|-----------------------------------------------------------------------------------------------------------------------------------------------------------------------------------------------|-----------------------------------------------------------------------------------------------------------------------------------------------|-------------------------------------------------------------------------------------------------------------------------------|
| Mull, John<br>Professor of Zoology<br>Weber State University<br>United States of America (the)                                                                                                | Mullen, Kerri *<br>Non-Tenure Track Biology Lecturer<br>United States of America (the)                                                        | Muller, Eduard<br>Regenerative development<br>University for International Cooperation<br>Costa Rica                          |
| Muller, Helen<br>Postgraduate Research Assistant<br>Institute of Zoology, Zoological Society of London<br>United Kingdom of Great Britain and Northern Ireland (the)                          | Muller, Richard<br>Computer Science<br>New Zealand                                                                                            | Müller, Adrian<br>Chemist<br>Eawag<br>Switzerland                                                                             |
| Müller, Anke<br>PhD Student in Nature Conservation Science<br>IMPRS on Earth System Modelling, University of Hamburg<br>Germany                                                               | Müller, Beat<br>Aquatic Geochemist<br>eawag, Swiss Federal Institute of Aquatic Science and Technology<br>Switzerland                         | Müller, Daniel<br>Senior Scientist<br>Leibniz Institute of Agricultural Development in Transition Economies (IAMO)<br>Germany |
| Müller, Jörg P.<br>Full Professor, Computer Science<br>Technische Universität Clausthal, Department of Informatics<br>Germany                                                                 | Müller, Lilian-Lee B.<br>PhD<br>University of Oldenburg<br>Germany                                                                            | Müller, Tina<br>Doctoral Researcher, Microbial Communications<br>University Hospital Jena<br>Germany                          |
| Mullerova, Jana<br>plant ecologist<br>Institute of Botany Czech Academy of Sciences<br>Czech Republic (the)                                                                                   | Mullin, Dale<br>Bachelor of Science, Majors in Zoology & Ecology<br>The University of Queensland<br>Australia                                 | Mullins, Hanan<br>Archaeology<br>Lebanese University<br>Lebanon                                                               |
| Mulrow, John<br>Researcher / PhD Student, Environmental Engineering<br>University of Illinois at Chicago, Civil & Materials Engineering<br>United States of America (the)                     | Mundaca, Enrique A.<br>Assistant Professor<br>Universidad Católica del Maule<br>Chile                                                         | Mundkur, Taej<br>Senior Technical Officer<br>Wetlands International<br>Netherlands (the)                                      |
| Munduruku, Mike *<br>graduando<br>UFOPA<br>Brazil                                                                                                                                             | Munguia, Steffanie *<br>International Environmental Policy<br>Middlebury Institute of International Studies<br>United States of America (the) | Munguira, Miguel L.<br>Professor Zoology<br>Universidad Autonoma de Madrid<br>Spain                                           |
| Munishi, Linus<br>Lecturer in Ecology and Conservation Biology<br>The Nelson Mandela-African Institution of Science and Technology (NM-AIST, Arusha, Tanzania<br>Tanzania, United Republic of | Muniz, Francisca Helena<br>Professor of Ecology and Botany<br>State University of Maranhão<br>Brazil                                          | Muniz, Jaqueline<br>Biologist<br>Brazil                                                                                       |

|                                                                                                                            |                                                                                                                                      |                                                                                                                              |
|----------------------------------------------------------------------------------------------------------------------------|--------------------------------------------------------------------------------------------------------------------------------------|------------------------------------------------------------------------------------------------------------------------------|
| Muniz, Pablo<br>Prof. Oceanography<br>Faculty of Sciences, University of the Republic (UdelaR)<br>Uruguay                  | Muñiz, Carlota<br>PhD candidate in Marine Biology<br>Rhodes University<br>South Africa                                               | Munjuga, Moses<br>Kenya                                                                                                      |
| Munk, Michael<br>PhD Student<br>Bioscience, Aarhus University<br>Denmark                                                   | Munn, Jamie<br>Teaching Assistant<br>United States of America (the)                                                                  | Munoz, Cynthia C<br>ecologist<br>Mexico                                                                                      |
| Muñoz, Antonio Román<br>Assistant Professor<br>Universidad de Málaga<br>Spain                                              | Muñoz, Gabriel<br>MSc. candidate<br>University of Amsterdam<br>Netherlands (the)                                                     | Muñoz, Isabel<br>Professor in Ecology<br>University of Barcelona<br>Spain                                                    |
| Muñoz, Laia<br>Msc in ecology<br>Universidad San Francisco de Quito<br>Ecuador                                             | Muñoz, M. Angeles<br>Postdoctoral Researcher/ Environmental Microbiology<br>UAM<br>Spain                                             | Muñoz, Nicolas<br>PhD Candidate<br>Simon Fraser University<br>Canada                                                         |
| Muñoz, Roldan<br>United States of America (the)                                                                            | Muñoz Hernández, Susana<br>Associate professor at Computer Science<br>Universidad Politécnica de Madrid<br>Spain                     | Muñoz Williams, Chelsea<br>Research Associate<br>Occidental College<br>United States of America (the)                        |
| Muñoz-Walther, Vicente<br>Research Technician<br>Departament of Biology, Universidad de Chile<br>Chile                     | Munro, Neil<br>Science Adviser, Atlantic Region, Retired<br>Parks Canada<br>Canada                                                   | Munson, Alison<br>Professor, Forest Ecology<br>Université Laval, Quebec<br>Canada                                            |
| Münster, Marie<br>Senior Researcher, Energy System Analysis<br>Technical University of Denmark<br>Denmark                  | MUNUCE, MARIA JOSE<br>PROFESSOR/RESERCHER<br>SCHOOL OF BIOCHEMICAL AND PHARMACEUTICAL<br>SCIENCES UNIVERSITY OF ROSARIO<br>Argentina | MUNZINGER, Jérôme<br>Researcher in Tropical Botany<br>IRD<br>France                                                          |
| Muraleedharan, Samada<br>Doctoral researcher, Life Science<br>Max Planck Institute for Terrestrial Microbiology<br>Germany | Muratori, Samantha<br>Relationship Manager<br>Citywire<br>United States of America (the)                                             | Murchie, Karen<br>United States of America (the)                                                                             |
| Murcia, Carolina<br>Restoration Ecologist<br>Pontificia Universidad Javeriana-Seccional Cali<br>Colombia                   | Murga, Cristina<br>Associate Professor<br>Universidad Autonoma de Madrid<br>Spain                                                    | Murga-Menoyo, Ma. Angeles<br>Reader<br>Unesco Chair of Environmental Education and<br>Sustainable Development. UNED<br>Spain |

|                                                                                                                                |                                                                                                                                       |                                                                                                                                                 |
|--------------------------------------------------------------------------------------------------------------------------------|---------------------------------------------------------------------------------------------------------------------------------------|-------------------------------------------------------------------------------------------------------------------------------------------------|
| Murgu, Roxana Nicoleta<br>Experimental Sciences Degree<br>Universidad Rey Juan Carlos<br>Spain                                 | Muriel, Candelas<br>Spain                                                                                                             | Muriel, Priscilla<br>Associate professor, School of Biological Sciences<br>Pontificia Universidad Católica del Ecuador<br>Ecuador               |
| Murphy, Robert<br>Professor and Sr. Curator<br>Royal Ontario Museum and University of Toronto<br>Canada                        | Murphy, Thomas<br>Laboratory Manager<br>Oregon State University - Hatfield Marine Science Center<br>United States of America (the)    | Murphy, Thomas<br>Laboratory Manager - Fisheries Ecology<br>Oregon State University<br>United States of America (the)                           |
| Murray, Cathryn<br>Senior Biologist<br>Fisheries and Oceans Canada<br>Canada                                                   | Murray, Christopher<br>Assistant Professor of Biology<br>United States of America (the)                                               | Murray, David<br>Post-Doctoral Research Associate<br>University of East Anglia<br>United Kingdom of Great Britain and Northern Ireland<br>(the) |
| Murray, Fiona<br>Marine Ecology<br>University of Edinburgh<br>United Kingdom of Great Britain and Northern Ireland<br>(the)    | Murray, James<br>Associate Professor of Biological Sciences<br>California State University East Bay<br>United States of America (the) | Murray, Jon<br>Geoscience<br>Lancaster University<br>United Kingdom of Great Britain and Northern Ireland<br>(the)                              |
| Murray, Kimberley<br>Ecologist<br>South Africa                                                                                 | Murray, Shauna<br>Associate Professor, Marine Biology<br>Climate Change Cluster, University of Technology Sydney<br>Australia         | Murray, Tara<br>Lecturer/entomologist<br>University of Canterbury<br>New Zealand                                                                |
| Murray, Tavi<br>Professor, Glaciologist<br>Swansea University<br>United Kingdom of Great Britain and Northern Ireland<br>(the) | Murray, Tomas<br>Ecologist<br>National Biodiversity Data Centre<br>Ireland                                                            | Murrell, Paul<br>Associate Professor Statistics<br>The University of Auckland<br>New Zealand                                                    |
| Murthy, Ganti<br>Professor, Biological and Ecological Engineering<br>Oregon State University<br>United States of America (the) | Musetta-Lambert, Jordan<br>PhD. Candidate<br>University of Guelph<br>Canada                                                           | Mushinsky, Henry<br>Professor Emeritus, Department of Integrative Biology<br>University of South Florida<br>United States of America (the)      |
| Musielak, Dora<br>Research Professor Engineering<br>University of Texas<br>United States of America (the)                      | Musil, Tanja<br>Researcher, Veterinary Medicine/Wildlife Management<br>Research Institute of Wildlife Ecology<br>Austria              | MUSILA, SIMON<br>MAMMAL BIOLOGIST<br>NATIONAL MUSEUMS OF KENYA<br>Kenya                                                                         |



|                                                                                                                                                                                                     |                                                                                                                   |                                                                                                                                                                                                                         |
|-----------------------------------------------------------------------------------------------------------------------------------------------------------------------------------------------------|-------------------------------------------------------------------------------------------------------------------|-------------------------------------------------------------------------------------------------------------------------------------------------------------------------------------------------------------------------|
| Musolin, Dmitry L.<br>Associate Professor of Department of Forest Protection,<br>Wood Science and Game Management<br>Saint Petersburg State Forest Technical University<br>Russian Federation (the) | Musseau, Camille<br>Postdoctoral Research Fellow<br>Freie Universität Berlin<br>Germany                           | Mustin, Karen<br>Research fellow<br>University of Aberdeen<br>United Kingdom of Great Britain and Northern Ireland<br>(the)                                                                                             |
| Muszevska, Anna<br>Assistant Professor<br>Institute of Biochemistry and Biophysics, Polish Academy<br>of Sciences<br>Poland                                                                         | Muth, Allan<br>Herpetology<br>University of California, Riverside<br>United States of America (the)               | Muths, Erin<br>zoology / wildlife ecology<br>United States of America (the)                                                                                                                                             |
| Mutton, Thomas<br>Ecologist<br>Australia                                                                                                                                                            | Muvengwi, Justice<br>Lecturer<br>Bindura University of Science Education<br>Zimbabwe                              | Muyembe-Tamfum, Jean Jacques<br>Prof. Microbiology and Dir. General Nat. Inst. Medical<br>research<br>Univ. Kinshasa Med. School and Inst. National Recherche<br>Bioméd-INRB-<br>Congo (the Democratic Republic of the) |
| Muys, Bart<br>Professor of Forest Ecology and Management<br>KU Leuven<br>Belgium                                                                                                                    | Muzquiz, Mariana<br>Masters student<br>Centro de investigaciones biológicas del Nororste<br>Mexico                | Mwampamba, Tuyeni<br>Research Professor<br>National Autonomous University of Mexico<br>Mexico                                                                                                                           |
| Mwangi, Evans<br>Ecologist/Conservation Biologist<br>University of Nairobi<br>Kenya                                                                                                                 | Mwavu, Edward<br>Associate Professor<br>Makerere University, Kampala<br>Uganda                                    | Myburg, Alexander<br>Professor (Genetics)<br>University of Pretoria<br>South Africa                                                                                                                                     |
| Mychajliw, Alexis<br>Postdoctoral Fellow, Biology<br>Stanford University<br>United States of America (the)                                                                                          | Myers, Kellen<br>University of Tennessee<br>United States of America (the)                                        | Myers, Monique<br>Marine Specialist<br>University of California Santa Barbara<br>United States of America (the)                                                                                                         |
| Myers, Rebekah<br>Natural Resource Management<br>Humbolt university of Berlin<br>Germany                                                                                                            | Myette, Alex<br>M.Sc. Candidate Conservation Biology<br>Trent University<br>Canada                                | Myhre, Gunnar<br>Senior Researcher<br>CICERO<br>Norway                                                                                                                                                                  |
| Myhre Errecaborde, Kaylee<br>Veterinarian, Faculty Member<br>University of Minnesota<br>United States of America (the)                                                                              | Mylonas, Elena<br>Postdoctoral Researcher. Molecular and Cellular Biology<br>Charité. Medicine Faculty<br>Germany | Mysłajek, Robert W.<br>Assistant Professor/Conservation Genetics<br>University of Warsaw, Faculty of Biology, Institute of<br>Genetics and Biotechnology, Conservation Genetics<br>Group<br>Poland                      |

|                                                                                                                                       |                                                                                                                                                               |                                                                                                                    |
|---------------------------------------------------------------------------------------------------------------------------------------|---------------------------------------------------------------------------------------------------------------------------------------------------------------|--------------------------------------------------------------------------------------------------------------------|
| Myssura, Maria *<br>entomology<br>Poland                                                                                              | N, Geetha<br>Professor<br>P S G College of Technology<br>India                                                                                                | N, Sivasothi<br>Biological Sciences<br>National University of Singapore<br>Singapore                               |
| Naaf, Tobias<br>Scientist, Landscape Ecologist<br>Leibniz-Centre for Agricultural Landscape Research<br>(ZALF), Müncheberg<br>Germany | Nabhan, Muna<br>Social Anthropolgy and Psychology<br>Germany                                                                                                  | Nachman, Gösta<br>Associate Professor (emeritus)<br>University of Copenhagen<br>Denmark                            |
| Nachtigall, Paul<br>Marine Biologist<br>Hawaii Institute of Marine Biology<br>United States of America (the)                          | Nachtschatt, Matthias<br>PhD Candidate<br>Queensland University of Technology<br>Australia                                                                    | NACIRI, Yamama<br>Curator<br>Conservatoire et Jardin botaniques de la Ville de Genève<br>Switzerland               |
| Nadal-Sala, Daniel<br>Researcher<br>University of Barcelona<br>Spain                                                                  | Nader, Helena<br>Professor of Molecular Biology<br>Universidade Federal de São Paulo<br>Brazil                                                                | Nagalingam, Kumaran<br>Postdoctoral Fellow<br>CSIRO<br>Australia                                                   |
| Nagel, Catie<br>Academic General Practitioner<br>University of Leeds<br>United Kingdom of Great Britain and Northern Ireland<br>(the) | Nagel, Jan Hendrik<br>Doctoral Candidate, Fungal Genomics<br>Forestry and Agricultural Biotechnology Institute,<br>University of Pretoria<br>South Africa     | Nagelkerke, Leo<br>Biologist<br>Wageningen University & Research<br>Netherlands (the)                              |
| NAGO, Sedjro Gilles Armel<br>Lecturer in Wildlife Ecology and Management<br>Université de Parakou<br>Benin                            | Nagy, Kelsi<br>PhD candidate/School of Geography and the Environment<br>University of Oxford<br>United Kingdom of Great Britain and Northern Ireland<br>(the) | Nagy, Laszlo<br>Professor doutor<br>Instituto de Biologia, Universidade Estadual de Campinas,<br>UNICAMP<br>Brazil |
| Nagy, Zoltán Tamás<br>Germany                                                                                                         | Nahmad-Achar, Eduardo<br>Research Fellow, Physics and Mathematics<br>National University of Mexico (UNAM)<br>Mexico                                           | Nahmad-Rohen, Luis<br>PhD Student<br>University of Auckland<br>New Zealand                                         |
| Nai, Corrado<br>PostDoc Microbiology/Biotechnology<br>Technische Universität Berlin<br>Germany                                        | Naidoo, Devashan<br>Postdoctoral Fellow, Biotechnology<br>University of KwaZulu-Natal<br>South Africa                                                         | Naidoo, Sashin<br>Student<br>Ukzn<br>South Africa                                                                  |
| Naik, Hiral<br>MSc Ecology, Environment and Conservation<br>University of Witwatersrand<br>South Africa                               | Naimo, Annalise<br>Monash University<br>Australia                                                                                                             | Naioo, Devashan<br>Postdoctoral Fellow, Biotechnology<br>University of KwaZulu-Natal<br>South Africa               |

|                                                                                                                                                                                  |                                                                                                        |                                                                                                                                                                               |
|----------------------------------------------------------------------------------------------------------------------------------------------------------------------------------|--------------------------------------------------------------------------------------------------------|-------------------------------------------------------------------------------------------------------------------------------------------------------------------------------|
| Naipal, Victoria<br>Earth system science<br>LSCE CEA CNRS UVSQ<br>France                                                                                                         | Nair, Sumit *<br>Teacher<br>International school of Almhult<br>Sweden                                  | Nair, Tarun<br>Conservation Biology<br>Researchers for Wildlife Conservation<br>India                                                                                         |
| Naithani, Sushma<br>Assistant Professor Senior Research<br>Oregon State University<br>United States of America (the)                                                             | Naka, Luciano<br>Adjunct Professor/Biological Sciences<br>Universidade Federal de Pernambuco<br>Brazil | Nakamura, Akihiro<br>PI in community ecology<br>Xishuangbanna Tropical Botanical Garden, Chinese<br>Academy of Sciences<br>China                                              |
| Nakamura, Mónia<br>Researcher/Biologist<br>CIBIO/InBIO, University of Porto<br>Portugal                                                                                          | Nalesso, Rosebel<br>Brazil                                                                             | NALETAKI, MARIA<br>RESEARCH ASSISTANT, OCEANOGRAPHY<br>HCMR<br>Greece                                                                                                         |
| Nallar, Rodolfo<br>Senior wildlife Veterinarian<br>Wildlife Conservation Society<br>Bolivia (Plurinational State of)                                                             | Nalven, Sarah<br>Environmental Scientist<br>Wenck Associates, Inc.<br>United States of America (the)   | Namy, Olivier<br>Director of research in biology<br>CNRS<br>France                                                                                                            |
| Napierska, Dorota<br>Biologist<br>European Commission - JRC<br>Italy                                                                                                             | Napolitano, Constanza<br>Postdoctoral Researcher<br>University of Chile<br>Chile                       | Napompeth, Banpot<br>Founder<br>KU Biological Control Research Center (formerly National<br>Biological Control Research Center), Kasetsart University,<br>Bangkok<br>Thailand |
| Napton, Darrell<br>Professor<br>South Dakota State University<br>United States of America (the)                                                                                  | Naranjo, Eduardo J.<br>Researcher<br>El Colegio de la Frontera Sur<br>Mexico                           | Narayanappa, Devaraju<br>Research Scientist, Climate Science<br>Laboratoire des Sciences du Climat et de<br>l'Environnement, CEA-Saclay<br>France                             |
| Narayanaswamy, Bhavani<br>Principal Investigator in Deep Sea Ecology<br>Scottish Association for Marine Science<br>United Kingdom of Great Britain and Northern Ireland<br>(the) | Nareff, Gretchen<br>Wildlife Biologist<br>USFWS<br>United States of America (the)                      | Nasanbat, Battogtokh *<br>Biologist<br>Institute of General and Experimental Biology, MAS<br>Mongolia                                                                         |
| Nascimento, Elynton Alves do<br>Professor - Environmental engineering<br>UNICENTRO - campus Irati<br>Brazil                                                                      | Nascimento, Jorge<br>Environmental Analyst<br>ICMBio, Serra dos Órgãos National Park<br>Brazil         | Nascimento, Luciana<br>Professor/ herpetology and comparative anatomy of<br>vertebrates<br>Pontificia Universidade Católica de Minas Gerais<br>Brazil                         |

|                                                                                                                                                                    |                                                                                                                                            |                                                                                                                              |
|--------------------------------------------------------------------------------------------------------------------------------------------------------------------|--------------------------------------------------------------------------------------------------------------------------------------------|------------------------------------------------------------------------------------------------------------------------------|
| Nascimento, Marcelo<br>Professor<br>Laboratório de Ciências Ambientais, Centro de Biociências e Biotecnologia, Universidade Estadual do Norte Fluminense<br>Brazil | Nascimento, Silvia<br>professor/Introduction to Ecology<br>Universidade Federal do Estado do Rio de Janeiro<br>Brazil                      | Nascimento, Thiago<br>Associate Professor<br>IESB Center University<br>Brazil                                                |
| Nascimento, Victor<br>Post-Doc<br>UFRGS<br>Brazil                                                                                                                  | Nash, Sarah<br>Epidemiologist<br>United States of America (the)                                                                            | Näslund, Joacim<br>Postdoctoral Researcher<br>University of South Bohemia<br>Czech Republic (the)                            |
| Nassar, Pedro<br>Tourism advisor - biology<br>Brazil                                                                                                               | Natarajan, Lakshminarayanan<br>Project Associate<br>Wildlife Institute of India<br>India                                                   | Nath, Nirmala<br>Australia                                                                                                   |
| Nath, Surajit<br>Senior Veterinarian<br>DS India<br>India                                                                                                          | Natha, Benjamin<br>United Kingdom of Great Britain and Northern Ireland (the)                                                              | NAUD, Marie-José<br>Scientific coordinator<br>Université du Québec à Rimouski<br>Canada                                      |
| Nauen, Cornelia E<br>President<br>Mundus maris - Sciences and Arts for Sustainability<br>Belgium                                                                   | Naug, Dhruva<br>Professor, Biology<br>Colorado State University<br>United States of America (the)                                          | Naughton, Lisa *<br>Professor, Department of Geography<br>University of Wisconsin, Madison<br>United States of America (the) |
| Naumann, Cayla<br>Professional Biologist<br>Canada                                                                                                                 | Nava, Porfirio<br>Full Professor<br>CINVESTAV, Mexico city<br>Mexico                                                                       | Navarrete-Mier, Francisco<br>Research Professor / Marine Ecology<br>EBIOAC - ULEAM University<br>Ecuador                     |
| Navarro, Ana Beatriz<br>Graduate student - Applied Ecology<br>University of São Paulo<br>Brazil                                                                    | Navarro, Laetitia<br>Biodiversity Conservation<br>German Centre for Integrative Biodiversity Research (iDiv) Halle-Jena-Leipzig<br>Germany | Navarro, Luis<br>Senior Lecturer on Plant Sciences<br>University of Vigo<br>Spain                                            |
| Navarro, Nuria<br>Professor<br>Universidad Rey Juan Carlos<br>Spain                                                                                                | Navarro, Rodrigo<br>Post-doc<br>Institute of Polymer Science and Technology<br>Spain                                                       | Navarro Rodríguez, Enrique<br>Researcher<br>Instituto Pirenaico de Ecología (Spanish National Research Council)<br>Spain     |
| Navascués, Miguel<br>Population genetics<br>INRA<br>France                                                                                                         | Nave, André *<br>Diretor<br>Bioflora Tecnologia da Restauração<br>Brazil                                                                   | Navis, Sabine<br>PhD Ecotoxicology, Project Scientist<br>KU Leuven, ARCHE<br>Belgium                                         |

|                                                                                                                    |                                                                                                                                                      |                                                                                                                                                     |
|--------------------------------------------------------------------------------------------------------------------|------------------------------------------------------------------------------------------------------------------------------------------------------|-----------------------------------------------------------------------------------------------------------------------------------------------------|
| Navitainuck, Denise<br>Research Assistant, Biology<br>ZEF<br>Germany                                               | Navon, Dina<br>PhD Candidate, Organismic & Evolutionary Biology<br>University of Massachusetts Amherst<br>United States of America (the)             | Naya, Daniel<br>Assistant Professor<br>Universidad de la Republica<br>Uruguay                                                                       |
| Naya, Hugo<br>Head of Bioinformatics<br>Institut Pasteur de Montevideo<br>Uruguay                                  | Nazareno, Alison<br>Postdoctoral researcher<br>University of São Paulo<br>Brazil                                                                     | Ndhlovu, Thabisani<br>Conservation Ecologist<br>Stellenbosch University<br>South Africa                                                             |
| Ndou, Julia<br>Student<br>University of Johannesburg<br>South Africa                                               | Neal, Benjamin<br>Marine Biology - Postdoctoral Researcher<br>Bigelow Laboratory for Ocean Sciences<br>United States of America (the)                | Nebbia, Giorgio<br>Professor emeritus<br>University of Bari<br>Italy                                                                                |
| Nebot, Anna<br>PhD<br>Spain                                                                                        | Nedelec, Sophie<br>Postdoctoral Research Fellow Marine Biology<br>University of Exeter<br>United Kingdom of Great Britain and Northern Ireland (the) | Needham, Mark<br>Professor, Human Dimensions of Natural Resources<br>Oregon State University<br>United States of America (the)                      |
| Neely, Merrie *<br>Biological Oceanographer<br>Neely Consulting Services<br>United States of America (the)         | Neeman, Amnon<br>Professor, mathematics<br>Australian National University<br>Australia                                                               | Neff, Felix<br>PhD student, ecology<br>Swiss Federal Institute for Forest, Snow and Landscape<br>Research WSL<br>Switzerland                        |
| Negev, Maya<br>University of Haifa<br>Israel                                                                       | Negrette, Kimberly<br>Biologist<br>Universidad de los Andes<br>Colombia                                                                              | Neher, Erwin *<br>Researcher, Biophysics<br>Max-Planck-Institute<br>Germany                                                                         |
| Neidel, David<br>Senior Research Fellow<br>Yale-NUS College<br>Singapore                                           | Neidig, Donald<br>Astronomy<br>AFRL, National Solar Observatory (retired)<br>United States of America (the)                                          | Neil, John<br>Micropalaeontologist<br>La Trobe University, Bendigo Campus - Victoria<br>Australia                                                   |
| Neils, A.<br>Executive Director<br>Conservation CATalyst<br>Namibia                                                | Neiman, Zysman *<br>Professor Asociado, Sustentability nas Environmental<br>Education<br>Universidade Federal de São Paulo<br>Brazil                 | Neitzel, Sophie Maxime<br>Research assistant<br>Wageningen University & Research<br>Netherlands (the)                                               |
| Neiva Mesquita Neto, José<br>PhD Candidate in Plant Biology<br>Federal University of Minas Gerais - UFMG<br>Brazil | Nejstgaard, Jens Christian<br>Research Group Leader<br>Leibniz-Institute of Freshwater Ecology and Inland<br>Fisheries (IGB)<br>Germany              | Nekaris, Anne-Isola<br>Professor in Primate Conservation<br>Oxford Brookes University<br>United Kingdom of Great Britain and Northern Ireland (the) |

|                                                            |                                                            |                                                            |
|------------------------------------------------------------|------------------------------------------------------------|------------------------------------------------------------|
| Nekrosienė, Rita *                                         | Nel, Amina                                                 | Nel, Larize                                                |
| Ecologist                                                  | Ecologist and environmental toxicologist                   | PhD Student                                                |
| Klaipeda University                                        | University of Johannesburg                                 | Nelson Mandela University                                  |
| Lithuania                                                  | South Africa                                               | South Africa                                               |
| Neldner, Karri                                             | Nelli, Luca                                                | Nelms, Sarah                                               |
| PhD candidate/Psychology                                   | Research Associate, spatial Ecology                        | Biosciences                                                |
| University of Queensland                                   | University of Glasgow                                      | University of Exeter                                       |
| Australia                                                  | United Kingdom of Great Britain and Northern Ireland (the) | United Kingdom of Great Britain and Northern Ireland (the) |
| Nelso, Andrew                                              | Nelson, Annika                                             | Nelson, Danielle V.                                        |
| Director Emeritus / Botanist                               | Ph.D. Student                                              | MS; Ph.D student, wildlife ecology                         |
| Rice Creek Field Station, SUNY Oswego                      | University of California, Irvine                           | Oregon State University                                    |
| United States of America (the)                             | United States of America (the)                             | United States of America (the)                             |
| Nelson, Edward *                                           | Nelson, Elliot                                             | Nelson, Michael                                            |
| Professor of Biological Sciences                           | Postdoctoral researcher in theoretical physics             | Ruth H. Spaniol Chair of Renewable Resources and           |
| Southeastern Louisiana University                          | Perimeter Institute for Theoretical Physics                | Professor of Environmental Ethics and Philosophy           |
| United States of America (the)                             | United States of America (the)                             | Oregon State University                                    |
|                                                            |                                                            | United States of America (the)                             |
| Nelson, Nicolette                                          | Nemova, Hana                                               | Neo, Mei Lin                                               |
| Ph.D. Student of Biology                                   | biochemist                                                 | Marine Biology                                             |
| Washington State University                                | Public Health Authority of the Slovak Republic             | National University of Singapore                           |
| United States of America (the)                             | Slovakia                                                   | Singapore                                                  |
| Nepi, Massimo                                              | Nepote, Ana                                                | Neri Barrios, Carla Ximena                                 |
| Associate Professor                                        | Ph.D. Student in Sustainability Sciences                   | BSc. Earth Sciences                                        |
| University of Siena                                        | Universidad Nacional Autonoma de México                    | UNAM                                                       |
| Italy                                                      | Mexico                                                     | Mexico                                                     |
| Neris Tomé, Jonay                                          | Neser, Otilie                                              | Neser, Stefan                                              |
| Research Fellow - Geography                                | Retired Senior Technician, taxonomy of Parasitic Wasps     | Researcher: Entomology and Biodiversity                    |
| Swansea University                                         | Biosystematics Division, Agricultural Research Council     | University of Pretoria                                     |
| United Kingdom of Great Britain and Northern Ireland (the) | South Africa                                               | South Africa                                               |
| Nesme, Thomas                                              | Nessimian, Jorge                                           | NETO, ANA ISABEL                                           |
| Professor                                                  | Professor of Zoology                                       | PROFESSOR                                                  |
| Bordeaux Sciences Agro - Univ Bordeaux                     | Universidade Federal do Rio de Janeiro                     | UNIVERSIDADE AÇORES                                        |
| France                                                     | Brazil                                                     | Portugal                                                   |
| Neto, Maurício *                                           | Neuenkamp, Lena                                            | Neuhaus, Birger                                            |
| University of Rio Grande do Norte                          | Phd student                                                | Curator "Vermees"                                          |
| Brazil                                                     | University of Tartu                                        | Museum für Naturkunde Berlin                               |
|                                                            | Estonia                                                    | Germany                                                    |

|                                                                                                                                                    |                                                                                                                                         |                                                                                                                                 |
|----------------------------------------------------------------------------------------------------------------------------------------------------|-----------------------------------------------------------------------------------------------------------------------------------------|---------------------------------------------------------------------------------------------------------------------------------|
| Neuman, Kristina<br>Ecologist<br>United States of America (the)                                                                                    | Neumann, Beate<br>Senior Scientific Officer<br>EMBL<br>Germany                                                                          | Neumann, Matthias<br>Master of Science (Zoology)<br>Naturalis Biodiversity Center<br>Netherlands (the)                          |
| Neumann, R K<br>Germany                                                                                                                            | Neumann, Veronica<br>Microbiology instructot<br>Milwaukee Area Technical College<br>United States of America (the)                      | Neusser, Timea<br>Research Assistant, Systematic Zoology<br>LMU Munich<br>Germany                                               |
| Nevalainen, Maisa<br>Doctoral student, Environmental Science and Policy<br>Finland                                                                 | Neves, Aline<br>Brazil                                                                                                                  | Neves, Eduardo<br>Professor of Archaeology<br>University of Sao Paulo<br>Brazil                                                 |
| Neves, Luis<br>Professor of Parasitology<br>University of Pretoria<br>Mozambique                                                                   | Neves, Maria João<br>Anthropologist<br>University of Coimbra<br>Portugal                                                                | Neves, Vanessa<br>Professor on Early Childhood Education<br>Universidade Federal de Minas Gerais<br>Brazil                      |
| Nevoux, Marie<br>Researcher<br>INRA<br>France                                                                                                      | Newman, Christopher<br>Zoology Research Fellow<br>University of Oxford<br>United Kingdom of Great Britain and Northern Ireland (the)    | Newsom, PhD, Amanda<br>Marine Ecology<br>United States of America (the)                                                         |
| Newsome, David<br>Assoc Prof Environmental Science and Ecotourism<br>Murdoch University<br>Australia                                               | Newton, Peter<br>Assistant Professor, Environmental Studies Program<br>University of Colorado Boulder<br>United States of America (the) | Newton, Rosemary<br>Plant Scientist<br>Royal Botanic Gardens, Kew<br>United Kingdom of Great Britain and Northern Ireland (the) |
| Newton, Ryan<br>United States of America (the)                                                                                                     | Newton, Thomas<br>Marine/Environmental Science<br>Environment Agency<br>United Kingdom of Great Britain and Northern Ireland (the)      | Ng, Soon Hwee<br>PhD student<br>The University of Western Australia<br>Australia                                                |
| Nguemo, Dr. Filomain<br>Principal Investigator<br>Center for Physiology and Pathophysiology. Faculty of Medicine. University of Cologne<br>Germany | Ngui, Michel *<br>remote sensing engineer<br>AGEOS<br>Gabon                                                                             | Nguyen, Duyen<br>Environmental Scientist<br>Biotechnology Center of Ho Chi Minh City<br>Viet Nam                                |
| Nguyen, Karena<br>PhD Candidate<br>University of South Florida<br>United States of America (the)                                                   | Nguyen, Suong *<br>Aquaculture<br>The University of Auckland<br>New Zealand                                                             | Nguyen, Thi Minh Tu<br>University of Antwerp<br>Belgium                                                                         |

|                                                                                                               |                                                                                                                                                                                                                               |                                                                                                                                                       |
|---------------------------------------------------------------------------------------------------------------|-------------------------------------------------------------------------------------------------------------------------------------------------------------------------------------------------------------------------------|-------------------------------------------------------------------------------------------------------------------------------------------------------|
| <p>NGUYEN, Thi Ngoc Anh<br/>PhD student<br/>IRD<br/>France</p>                                                | <p>Nguyen Thai, Hoa<br/>Environment, Health and Safety<br/>Viet Nam</p>                                                                                                                                                       | <p>Nhantumbo, Nascimento<br/>Assistant Professor, Farming system design and modelling<br/>Instituto Superior Politecnico de Manica<br/>Mozambique</p> |
| <p>Niamir, Aidin<br/>Postdoc<br/>Senckenberg Biodiversity and Climate Research Institute<br/>Germany</p>      | <p>Niang, El Hadji Amadou<br/>PDRA<br/>Cheikh Anta Diop University<br/>Senegal</p>                                                                                                                                            | <p>Nicholas, Aaron<br/>Program Director, Ruaha-Katavi Landscape Program<br/>Wildlife Conservation Society<br/>Tanzania, United Republic of</p>        |
| <p>Nicholas, George<br/>Professor of Archaeology<br/>Simon Fraser University<br/>Canada</p>                   | <p>Nichols, Amber<br/>United Kingdom of Great Britain and Northern Ireland<br/>(the)</p>                                                                                                                                      | <p>Nichols, Elizabeth<br/>Assistant Professor of Conservation Biology<br/>Swarthmore College<br/>United States of America (the)</p>                   |
| <p>Nicholson, Abbigail<br/>Life Science Instructor<br/>Crowder College<br/>United States of America (the)</p> | <p>Nicoli Bandeira, Lucas<br/>PhD student<br/>INPA<br/>Brazil</p>                                                                                                                                                             | <p>Nickel, Michael<br/>Scientific consultant (Evolutionary Biology,<br/>Zoomorphology, Bionics)<br/>bionic-consulting.de<br/>Germany</p>              |
| <p>Nickels, Lyndsey<br/>Professor, Cognitive Science<br/>Macquarie University, Sydney<br/>Australia</p>       | <p>Nickles, Katie<br/>Marine Biologist<br/>University of Rhode Island<br/>United States of America (the)</p>                                                                                                                  | <p>Nickols, Kerry<br/>Assistant Professor, Biology<br/>California State University Northridge<br/>United States of America (the)</p>                  |
| <p>Nicolas, Angie<br/>Research Assistant in Ecology<br/>University of British Columbia<br/>Canada</p>         | <p>Nicolas, Aurore<br/>Teaching assistant in animal biology, PhD student in<br/>agronomy<br/>UCL<br/>Belgium</p>                                                                                                              | <p>Nicolas, Delphine<br/>Research scientist<br/>Fondation Tour du Valat<br/>France</p>                                                                |
| <p>Nicolas, Timothee<br/>Physics Postdoc<br/>EPFL<br/>Switzerland</p>                                         | <p>NICOLAS, Violaine<br/>Assistant Professor, Biology<br/>Museum National d'Histoire Naturelle<br/>France</p>                                                                                                                 | <p>Nicolau, Gary<br/>Environmental scientist<br/>Private<br/>South Africa</p>                                                                         |
| <p>Nicolet, Benoit<br/>PhD Biomedical Science<br/>Netherlands (the)</p>                                       | <p>Nicolopoulou Stamati, Polyxeni<br/>Prof. Environmental Pathology MSc Environment and<br/>Health Sapacity Building for Decision Making<br/>Medical School National and Kapodistrian University of<br/>Athens<br/>Greece</p> | <p>Nieberding, Caroline<br/>Associate Professor<br/>University of Louvain-la-Neuve<br/>Belgium</p>                                                    |



|                                                                                                                                                 |                                                                                                                                                     |                                                                                                                                                                   |
|-------------------------------------------------------------------------------------------------------------------------------------------------|-----------------------------------------------------------------------------------------------------------------------------------------------------|-------------------------------------------------------------------------------------------------------------------------------------------------------------------|
| Niedrist, Georg<br>PhD candidate<br>University of Innsbruck<br>Austria                                                                          | Nielsen, Anders<br>Researcher<br>Centre for Ecological and Evolutionary Synthesis,<br>University of Oslo<br>Norway                                  | Nielsen, Daniel Aagren<br>Microbiologist<br>Australia                                                                                                             |
| Nielsen, Scott<br>Associate Professor & Alberta Biodiversity Conservation<br>Chair<br>University of Alberta<br>Canada                           | Nielsen, Sven<br>Paleontologist, Associate Professor, Director Institute of<br>Earth Sciences<br>Universidad Austral de Chile<br>Chile              | Niemeier, Stephanie<br>PhD candiate in Ecology<br>BBIB Berlin Brandenburg Institute of Advanced<br>Biodiversity Research; Museum für Naturkunde Berlin<br>Germany |
| Niemeyer, Julia<br>Biologist<br>Universidade Federal do Rio de Janeiro<br>Brazil                                                                | Nieminen, Eini<br>PhD Student<br>University of Jyväskylä, Department of Biological and<br>Environmental Science<br>Finland                          | Nieradzki, Lars<br>Research Fellow, Environmental and Climate Research<br>Lund University<br>Sweden                                                               |
| Nievales, Marie Frances<br>Associate Professor/Marine Biologist<br>University of the Philippines Visayas<br>Philippines (the)                   | Nifong, James<br>Postdoctoral Research Associate<br>Kansas State University<br>United States of America (the)                                       | Niggemann, Jutta<br>Germany                                                                                                                                       |
| Nihei, Silvio<br>Associate Professor (Entomology)<br>University of Sao Paulo<br>Brazil                                                          | Nijman, Vincent<br>Professor in Anthropology<br>Oxford Brookes University<br>United Kingdom of Great Britain and Northern Ireland<br>(the)          | Nijmeijer, Annemarijn<br>PhD-student<br>Cirad<br>France                                                                                                           |
| Nijs, Ivan<br>Professor of Ecology<br>University of Antwerp<br>Belgium                                                                          | Nik Omar, Nik Nurhazirah<br>PhD candidate in water resources governance<br>Institute of Oceanography, Universiti Malaysia<br>Terengganu<br>Malaysia | Nikinmaa, Mikko<br>Professor of Zoology<br>University of Turku<br>Finland                                                                                         |
| Nikishina, Daria<br>PhD Student<br>Saint-Petersburg State University, Department of<br>Hydrobiology and Ichthyology<br>Russian Federation (the) | NIKOLIC, Natacha *<br>Researcher<br>Agence de Recherche pour la Biodiversité à la Réunion<br>(ARBRE)<br>France                                      | Nikolski, Macha<br>Head of Bordeaux Bioinformatics Center<br>CNRS<br>France                                                                                       |
| Nikstat, Amelie<br>PhD student, Psychology<br>Bielefeld University<br>Germany                                                                   | Nilsson, Boel<br>Biology<br>University of Gothenburg<br>Sweden                                                                                      | Nilsson, Christer<br>Professor in Landscape Ecology<br>Umeå University<br>Sweden                                                                                  |

|                                                                                                                                                                 |                                                                                                                         |                                                                                                                                                                           |
|-----------------------------------------------------------------------------------------------------------------------------------------------------------------|-------------------------------------------------------------------------------------------------------------------------|---------------------------------------------------------------------------------------------------------------------------------------------------------------------------|
| NILUS, REUBEN *<br>FOREST ECOLOGY<br>SABAH FORESTRY DEPARTMENT<br>Malaysia                                                                                      | Nimbs, Matthew<br>Invertebrate Taxonomist<br>Southern Cross University<br>Australia                                     | Nimmo, Dale<br>Conservation biologist<br>Charles Sturt University<br>Australia                                                                                            |
| Nir, Iris<br>Archaeologist<br>Israel                                                                                                                            | NIR, YAACOV<br>PhD in Marine Geology<br>Retired, Geological Survey of israel<br>Israel                                  | Nishimura, Akane<br>Ecology and Evolutionary Biology<br>UCLA<br>United States of America (the)                                                                            |
| Nissen, Poul<br>prof. protein biochemistry<br>Aarhus University<br>Denmark                                                                                      | Njabo, Kevin<br>Adj Professor/Associate Director<br>UCLA Center for Tropical Research<br>United States of America (the) | NJIANG, Antoine<br>Sub-director of Protected Areas /in forestry and Wildlife<br>Ministry in charge of Forests and Wildlife<br>Cameroon                                    |
| Nkwabi, Ally<br>Research Scientist in animal ecology (PhD holder in<br>Applied Zoology)<br>Tanzania Wildlife Research Institute<br>Tanzania, United Republic of | Nnaji, Chigozie Omenmayor<br>Marine and Environmental Toxicologist<br>University of Lagos<br>Nigeria                    | Nobi, Kenneth<br>Climate Change Mitigation-REDD+<br>Papua New Guinea Climate Change & Development<br>Authority<br>Papua New Guinea                                        |
| Noble, Michael<br>Biosecurity - invasive species management<br>Australia                                                                                        | Noble, Natasha<br>Research Assistant Psychology and Environmental Science<br>University of Newcastle<br>Australia       | Nobre, Antonio Donato<br>Senior Scientist INPA, Visiting Scholar INPE<br>National Institute for Amazonian Research and National<br>Institute for Space Research<br>Brazil |
| Nobre, Carlos<br>Earth System Science<br>National Institute of S&T for Climate Change<br>Brazil                                                                 | Nobre, Paulo<br>Senior Researcher, Ph.D./Climatologist<br>National Institute for Space Research - INPE<br>Brazil        | Nobrega, Caroline<br>Researcher<br>IPAM<br>Brazil                                                                                                                         |
| Nobrega, Eurípedes<br>Professor, Engineering<br>University of Campinas<br>Brazil                                                                                | Nobrega, Rodolfo<br>Research Assistant<br>University of Goettingen<br>Germany                                           | Nobrega, Rodrigo<br>Professor<br>Federal University of Minas Gerais<br>Brazil                                                                                             |
| Nóbrega Gomes, Vanessa *<br>PhD<br>Federal University of Mato Grosso do Sul<br>Brazil                                                                           | Nocera, Joseph J.<br>Assistant Professor<br>University of New Brunswick<br>Canada                                       | Nock, Charles<br>Lecturer<br>University of Freiburg<br>Germany                                                                                                            |
| Nodari, Rubens *<br>Full Professor<br>Federal University of Santa Catarina<br>Brazil                                                                            | Noel, Jacob<br>Remote Sensing Scientist<br>University of Maryland<br>United States of America (the)                     | Noel, Vincent<br>Research Scientist<br>CNRS<br>France                                                                                                                     |

|                                                                                                                                                                                                                                |                                                                                                                                       |                                                                                                                                                                    |
|--------------------------------------------------------------------------------------------------------------------------------------------------------------------------------------------------------------------------------|---------------------------------------------------------------------------------------------------------------------------------------|--------------------------------------------------------------------------------------------------------------------------------------------------------------------|
| Noeth, Kayla<br>Research Officer; Forest Entomology<br>Sappi Southern Africa<br>South Africa                                                                                                                                   | Nogueira, Denis<br>Professor of Biology/Ecology<br>Mato Grosso Federal Institute<br>Brazil                                            | Nogueira, João<br>Associate Professor - Invertebrates<br>Instituto de Biociências, Universidade de São Paulo<br>Brazil                                             |
| Nogueira, Melissa<br>Professor Botanic<br>UEPG<br>Brazil                                                                                                                                                                       | Nolan, Emma<br>Post Graduate Researcher<br>Bournemouth University<br>United Kingdom of Great Britain and Northern Ireland<br>(the)    | Nolan, Rachael<br>Research Associate<br>University of Technology Sydney<br>Australia                                                                               |
| Noll, João Francisco<br>Universidade Regional de Blumenau<br>Brazil                                                                                                                                                            | Nolla-Ardevol, Vimal<br>Postdoctoral researcher / Environmental Biotechnologist<br>KU Leuven<br>Belgium                               | Nonnis Marzano, Carlotta<br>Researcher in Zoology<br>University of Bari Aldo Moro<br>Italy                                                                         |
| Noonan, Brice<br>Associate Professor, Biology<br>University of Mississippi<br>United States of America (the)                                                                                                                   | Noordijk, Jinze<br>Ecologist<br>European Invertebrate Survey - the Netherlands<br>Netherlands (the)                                   | Norberg, Åke<br>Assistant professor in zoology (emeritus)<br>University of Gothenburg<br>Sweden                                                                    |
| Norbu, Nawang<br>Director<br>Bhutan Ecological Society<br>Bhutan                                                                                                                                                               | Nordby, Cully<br>Associate Director<br>UCLA Institute of the Environment and Sustainability<br>United States of America (the)         | Nordén, Björn<br>Researcher/Assistant Professor<br>Norwegian Institute for Nature Research<br>Norway                                                               |
| Norder, Sietze<br>PhD candidate<br>Centre for Ecology, Evolution and Environmental Changes<br>(cE3c) / Azorean Biodiversity Group, Faculdade de<br>Ciências, Universidade de Lisboa, 1749-016, Lisboa,<br>Portugal<br>Portugal | Nordstrom, Lora<br>Clinical Research<br>United States of America (the)                                                                | Norenburg, Jon<br>Chair/Research Zoologist<br>Department Invertebrate Zoology, Smithsonian National<br>Museum of Natural History<br>United States of America (the) |
| Nori, Franco<br>Chief Scientist<br>RIKEN (Saitama, Japan) and University of Michigan (Ann<br>Arbor, USA)<br>Japan                                                                                                              | Noriega, Jorge Ari<br>Research assistant<br>Laboratory of Zoology and Aquatic Ecology - LAZOE, A,<br>University los Andes<br>Colombia | Norman, Brad<br>Marine Biologist and Lead Scientist<br>ECOCEAN Inc.<br>Australia                                                                                   |
| Norman, Sven<br>Department of ecology and environmental science, Umeå<br>university<br>Sweden                                                                                                                                  | Normand, Philippe<br>Microbial ecologist<br>University Lyon, CNRS<br>France                                                           | Normark, Benjamin<br>Professor of Biology<br>University of Massachusetts Amherst<br>United States of America (the)                                                 |

|                                                                                                                                            |                                                                                                                                                                 |                                                                                                                                            |
|--------------------------------------------------------------------------------------------------------------------------------------------|-----------------------------------------------------------------------------------------------------------------------------------------------------------------|--------------------------------------------------------------------------------------------------------------------------------------------|
| Normark, Eddy<br>Public Health Science Student<br>Skövde Univeristy<br>Sweden                                                              | Nørregaard, Lasse<br>Project Coordinator / Master of Science in Biotechnology<br>Danish Technical University<br>Denmark                                         | Norris, Ken<br>Director of Science<br>Institute of Zoology<br>United Kingdom of Great Britain and Northern Ireland<br>(the)                |
| North, Gretchen<br>Professor of Biology<br>Occidental College<br>United States of America (the)                                            | Northfield, Tobin<br>Lecturer, ecology<br>James Cook University<br>Australia                                                                                    | Norton, Andrew<br>Director/Research Scientist<br>Renues/Bangor University<br>United Kingdom of Great Britain and Northern Ireland<br>(the) |
| Norton, Briony<br>Postdoctoral researcher, Ecology<br>University of Derby<br>United Kingdom of Great Britain and Northern Ireland<br>(the) | Norton, David<br>Professor<br>University of Canterbury<br>New Zealand                                                                                           | Noss, Reed<br>Naturalist<br>Florida Institute for Conservation Science<br>United States of America (the)                                   |
| Notarbartolo di Sciara, Giuseppe<br>Marine conservation ecologist<br>Tethys Research Institute<br>Italy                                    | Notari, Bruno<br>Chemistry<br>Northeastern University<br>United States of America (the)                                                                         | Notarianni, Elena<br>United Kingdom of Great Britain and Northern Ireland<br>(the)                                                         |
| Nouailhetas, Viviane<br>Associate Professor<br>Federal Universitário São Paulo<br>Brazil                                                   | NOULÉKOUN, Florent<br>Junior researcher<br>Department of ecology and Natural Resources<br>Management at the Center for Development Research<br>(ZEF)<br>Germany | Noullett, Melanie<br>research Support Officer - MSc Air Quality<br>University of Northern British Columbia<br>Canada                       |
| Nouvian, Morgane<br>Post-doc, Biology<br>University of Konstanz, Germany<br>France                                                         | Novaes, José Luís<br>Professor / Ecology<br>Universidade Federal Rural do Semi-Árido<br>Brazil                                                                  | Novaes, Roberto Leonan<br>Collaborator Reseacher - Ecology and Evolution<br>Federal University of Rio de Janeiro<br>Brazil                 |
| Novak, Mark<br>Assistant Professor<br>Oregon State University<br>United States of America (the)                                            | Novellie, Peter<br>Wildlife biologist<br>Nelson Mandela University<br>South Africa                                                                              | Novelo, Eberto<br>Full time professor / Phycology<br>School of Sciences, National Autonomous University of<br>Mexico<br>Mexico             |
| Novillo Gonzalez, Marylin C<br>Adjunct Faculty of the Biology Department<br>UNC Wilmington<br>United States of America (the)               | Novo, María<br>Chairholder UNESCO Chair in Environmental Education<br>and Sustainable Developmente.<br>National University of Distance Education<br>Spain       | Novoa, Ana<br>Scientist in ecology<br>Institute of Botany, Czech Academy of Sciences<br>Czech Republic (the)                               |

|                                                                                                                             |                                                                                                                                                                                                                                                                                                                     |                                                                                                                                                             |
|-----------------------------------------------------------------------------------------------------------------------------|---------------------------------------------------------------------------------------------------------------------------------------------------------------------------------------------------------------------------------------------------------------------------------------------------------------------|-------------------------------------------------------------------------------------------------------------------------------------------------------------|
| Novoa, Stefani<br>Oceanography<br>Spain                                                                                     | Novosolov, Maria<br>Zoology PhD student<br>Tel Aviv University<br>Israel                                                                                                                                                                                                                                            | Nowacki, Stephen<br>Scientist - Marine Ecologist<br>Scottish Environment Protection Agency<br>United Kingdom of Great Britain and Northern Ireland<br>(the) |
| Nowak, Katarzyna<br>Research Associate<br>University of the Free State, Qwaqwa<br>South Africa                              | Nowak, Sabina<br>President/Large Carnivore Biology<br>Association for Nature "Wolf"<br>Poland                                                                                                                                                                                                                       | Nowicki, Piotr<br>associate professor / ecology<br>Institute of Environmental Sciences, Jagiellonian<br>University<br>Poland                                |
| Noya, Jelena<br>Msc Computer Science<br>Bristol University<br>United Kingdom of Great Britain and Northern Ireland<br>(the) | Nshutiyayesu, Samuel<br>Ecologist and conservation botanist<br>University of Rwanda<br>Rwanda                                                                                                                                                                                                                       | Nsibo, David Livingstone<br>PhD Plant Science Student<br>University of Pretoria<br>South Africa                                                             |
| Nsor, Charles<br>Ecology and ornithology<br>Gombe State University<br>Nigeria                                               | NTAHOMPAGAZE, Pascal *<br>International Expert (Adviser/Researcher/Analyst-<br>Writer/reporter) in Sustainable<br>Development/Environment and International<br>Politics/Relations<br>International Expertise/Network for Sciences/Socio-<br>economic Well-being in partnership with EU and UN<br>Systems<br>Belgium | Ntlokk, Bongani<br>Biodiversity & Conservation Ecology<br>Northwest University<br>South Africa                                                              |
| Ntuli, Sandile<br>Graduate, Life Sciences<br>University of KwaZulu-Natal<br>South Africa                                    | Nuerk, Nicolai M.<br>Biodiversity & Plant Systematics; Dr.<br>University of Bayreuth<br>Germany                                                                                                                                                                                                                     | Nuijten, Rascha<br>PhD Animal Ecology<br>Netherlands Institute of Ecology (NIOO-KNAW)<br>Netherlands (the)                                                  |
| Nunes, Angelica<br>Research assistant<br>National Institute of Amazonian Research<br>Brazil                                 | Nunes, Cássio Alencar<br>PhD Student - Applied Ecology<br>Universidade Federal de Lavras<br>Brazil                                                                                                                                                                                                                  | Nunes, José de Anchieta<br>Post Doc<br>Laboratório de Ecologia Bentônica, Universidade Federal<br>da Bahia, Brazil<br>Brazil                                |
| Nunes, Mário<br>Biologist<br>UFAM<br>Brazil                                                                                 | Nunes, Pedro M. Sales<br>Adjunct Professor - Vertebrate Zoology<br>Universidade Federal de Pernambuco (UFPE)<br>Brazil                                                                                                                                                                                              | Nunes, Sandra Adriana Neves<br>Adjunct Teacher- Public Health<br>Universidade Federal do Sul da Bahia<br>Brazil                                             |

|                                                                                                                                                                                     |                                                                                                               |                                                                                                                                                        |
|-------------------------------------------------------------------------------------------------------------------------------------------------------------------------------------|---------------------------------------------------------------------------------------------------------------|--------------------------------------------------------------------------------------------------------------------------------------------------------|
| Nunes-Freitas, André Felipe<br>Associate Professor<br>Universidade Federal Rural do Rio de Janeiro<br>Brazil                                                                        | Nuñez, Chase<br>Graduate Research Fellow, Ecology<br>Duke University<br>United States of America (the)        | Nuñez, Daniela<br>Magister en Ciencias mención Producción, Manejo y Conservación de Recursos Naturales<br>Universidad de Los Lagos<br>Chile            |
| Nuñez, José J.<br>Zoologist<br>Universidad Austral de Chile<br>Chile                                                                                                                | Núñez, José I<br>Researcher<br>IRTA-CReSA<br>Spain                                                            | Nuñez iturri, Gabriela<br>Research Associate<br>Herbario Forestal UNALM<br>Peru                                                                        |
| Nunez Pons, Laura<br>Researcher<br>Stazione Zoologica Anton Dohrn<br>Spain                                                                                                          | Núñez-Ávila, Mariela C.<br>Conservation Biologist<br>Instituto de Ecología y Biodiversidad<br>Chile           | Nunez-Mino, Jose<br>Director of Communications and Fundraising<br>Bat Conservation Trust<br>United Kingdom of Great Britain and Northern Ireland (the) |
| Nunez-Regueiro, Mauricio<br>Postdoctoral Researcher, Bridging Biodiversity & Conservation Science Program<br>University of Arizona<br>United States of America (the)                | Nuñez-Useche, Fernando<br>Associated research<br>Universidad Nacional Autónoma de México<br>Mexico            | Nuno, Ana<br>Research Fellow<br>University of Exeter<br>United Kingdom of Great Britain and Northern Ireland (the)                                     |
| Nuno, Negroes<br>Coordinator for Research and Monitoring<br>Bolivian Association for the Research and Conservation of Andean Ecosystems – ACEAA<br>Bolivia (Plurinational State of) | Nüske, Elisabeth<br>PostDoc<br>MPI-CBG Dresden<br>Germany                                                     | Nüske, Jörg<br>scientific coworker microbiology<br>University of Jena, Institute for Microbiology<br>Germany                                           |
| Nuss, Matthias<br>Entomologist<br>Senckenberg Museum of Zoology Dresden<br>Germany                                                                                                  | Nussbaum, Ruth<br>Director<br>Proforest<br>United Kingdom of Great Britain and Northern Ireland (the)         | Nussenzveig, Paulo<br>Professor of Physics<br>University of São Paulo<br>Brazil                                                                        |
| Nussle, Sean *<br>Ecology<br>Kent State University<br>United States of America (the)                                                                                                | Nüsslein, Klaus<br>Professor of Microbiology<br>University of Massachusetts<br>United States of America (the) | Nuttall, Matthew<br>Conservation Scientist<br>Scottish Wildlife Trust<br>United Kingdom of Great Britain and Northern Ireland (the)                    |
| Nuuttila, Hanna<br>Postdoctoral researcher / marine biology<br>Swansea University<br>United Kingdom of Great Britain and Northern Ireland (the)                                     | Nuytinck, Jorinde<br>Mycologist<br>Naturalis Biodiversity Center<br>Netherlands (the)                         | Nwaogu, Chima<br>Ecology<br>University of Groningen<br>Netherlands (the)                                                                               |

|                                                                                                                        |                                                                                                                                                                                                                                                                                                                              |                                                                                                                                                     |
|------------------------------------------------------------------------------------------------------------------------|------------------------------------------------------------------------------------------------------------------------------------------------------------------------------------------------------------------------------------------------------------------------------------------------------------------------------|-----------------------------------------------------------------------------------------------------------------------------------------------------|
| Nyasmythe, Dainty<br>Ecological Anthropologist<br>SmartGirls Africa<br>Kenya                                           | Nydahl, Anna<br>PhD Student Limnology<br>Sweden                                                                                                                                                                                                                                                                              | Nydegger Bell, Mara<br>Ranger/Conservation Biologist<br>Department of Conservation<br>New Zealand                                                   |
| Nygård, Yvonne<br>Assistant Professor in Industrial Biotechnology<br>Chalmers University of Technology<br>Sweden       | Nyhus, Philip<br>Director and Associate Professor, Environmental Studies<br>Program<br>Colby College<br>United States of America (the)                                                                                                                                                                                       | Nyssa, Zoe<br>Assistant Professor<br>Purdue University<br>United States of America (the)                                                            |
| Nyumu, Jonas<br>Researcher<br>Tayna Center for Conservation Biology<br>Congo (the Democratic Republic of the)          | O. Escobar, Carlos<br>Retired professor of Physics<br>UNICAMP<br>Brazil                                                                                                                                                                                                                                                      | O. Rodrigues, Allan R.<br>PhD<br>Federal University of Pará<br>Brazil                                                                               |
| Oakes, Lauren E.<br>Ecology and Human-Natural Systems Science<br>Stanford University<br>United States of America (the) | Obadă, Theodor<br>scientific researcher, paleontologist<br>Academy of Sciences of Moldova, Institute of Zoology, 1<br>Academiei Street, MD-2028 Chişinău, Republic of<br>Moldova. National Museum of Ethnography and Natural<br>History, 82 Mihail Kogălniceanu Street, MD-2009<br>Chişinău, Republic of Moldova.<br>Romania | Oberlin, Herbert<br>Germany                                                                                                                         |
| Obermayer, Renate<br>Biology<br>Austria                                                                                | O'Brien, Casey<br>Ecologist<br>Adelaide University<br>Australia                                                                                                                                                                                                                                                              | O'Brien, Gordon<br>Researcher Aquatic Ecology<br>University of KwaZulu-Natal<br>South Africa                                                        |
| O'Brien, Siobhan<br>ACE Research Fellow<br>ETH Zurich<br>Switzerland                                                   | Obsines, Ric<br>Agri.trends1545@gmail.com,<br>Philippines (the)                                                                                                                                                                                                                                                              | Obst, Matthias<br>Associate Professor<br>Department of Marine Sciences, University of Gothenburg<br>Sweden                                          |
| Obura, David<br>Director and Lead Investigator, marine ecology<br>CORDIO East Africa<br>Kenya                          | Ocampo-Ariza, Carolina<br>Nature conservation<br>Georg-August Universität Göttingen<br>New Zealand                                                                                                                                                                                                                           | Ocampo-Penuela, Natalia<br>Postdoctoral Fellow<br>ETH Zurich<br>Colombia                                                                            |
| Ocaña Vicente, Oscar<br>Director of the Museum<br>Museo del Mar de Ceuta<br>Spain                                      | Occhibove, Flavia<br>DVM and PhD candidate in Wildlife Disease Ecology<br>Aberystwyth University<br>Italy                                                                                                                                                                                                                    | Oceguera-Figueroa, Alejandro<br>Researcher, Systematics and Taxonomy<br>Instituto de Biología, Universidad Nacional Autónoma de<br>México<br>Mexico |

|                                                                                                                                   |                                                                                                                                    |                                                                                                                                                          |
|-----------------------------------------------------------------------------------------------------------------------------------|------------------------------------------------------------------------------------------------------------------------------------|----------------------------------------------------------------------------------------------------------------------------------------------------------|
| Ochoa, Diana<br>Geologist Postdoc Researcher<br>Universidad Peruana Cayetano Heredia<br>Colombia                                  | Ochoa Quintero, Jose Manuel<br>Research coordinator<br>Alexander von Humboldt Institute<br>Colombia                                | Ochoa-Herrera, Valeria<br>Department Head/Environmental Engineering<br>Universidad San Francisco de Quito<br>Ecuador                                     |
| Ochoa-Ochoa, Leticia M.<br>Associate Professor<br>Universidad Nacional Autónoma de México<br>Mexico                               | Öckinger, Erik<br>Associate professor, Ecology<br>Swedish University of Agricultural Sciences<br>Sweden                            | O'Connell, Christine<br>Postdoctoral Researcher, Ecology<br>University of California, Berkeley<br>United States of America (the)                         |
| O'Connell, John<br>Professor Emeritus of Chemical Engineering<br>University of Virginia<br>United States of America (the)         | O'Connell, Timothy<br>Associate Professor/Wildlife Ecology<br>Oklahoma State University<br>United States of America (the)          | O'Connor, Katie<br>Project Manager and Facilitator<br>Conservation Biology Institute<br>United States of America (the)                                   |
| O'Connor, Nessa<br>Ass Prof<br>Trinity College Dublin<br>Ireland                                                                  | O'Connor, Patrick<br>Associate Professor Global Food and Resources<br>University of Adelaide<br>Australia                          | O'Connor BSc GradCIEEM, Robert<br>Ecologist<br>Canal and River Trust UK<br>United Kingdom of Great Britain and Northern Ireland<br>(the)                 |
| O'Dea, Aaron<br>Staff Scientist<br>Smithsonian Tropical Research Institute<br>Panama                                              | O'Dea, Jimmy<br>Vehicles Analyst<br>Union of Concerned Scientists<br>United States of America (the)                                | Odebrecht, Clarisse<br>Professor<br>Federal University of Rio Grande-FURG<br>Brazil                                                                      |
| Odebrecht, Clarisse<br>Professor<br>Federal University of Rio Grande<br>Brazil                                                    | Ødegård, Øyvind<br>Predoctoral Fellow / Cell Biology and biophysics<br>The European Molecular Biology Laboratory (EMBL)<br>Germany | Odell, Alexander<br>Productive misfit<br>University of Cambridge Engineering Department<br>United Kingdom of Great Britain and Northern Ireland<br>(the) |
| Odonne, Guillaume<br>Ph. D., Researcher in Ethnobiology/ethnoecology<br>Centre National de la Recherche Scientifique<br>France    | O'DONNELL, BRENNAN<br>Student<br>Tulane University<br>United States of America (the)                                               | O'Donnell, Mary Kate<br>Graduate Student in Biomechanics<br>University of South Florida<br>United States of America (the)                                |
| O'Donnell, Sean<br>Professor of Biodiversity Earth & Environmental Science<br>Drexel University<br>United States of America (the) | Odorico, Andreas<br>PhD Student<br>CNRS<br>France                                                                                  | O'Dwyer, Lorna<br>Medical doctor<br>Ireland                                                                                                              |
| Oedin, Malik<br>PhD student<br>Institut Agronomique néo Calédonien<br>New Caledonia                                               | Oedrosa, Felipe<br>Ecologist<br>Instituto de Biociências, São Paulo State University, Rio<br>Claro<br>Brazil                       | Oellermann, Larry<br>CEO<br>Oceanographic Research Institute (SAAMBR)<br>South Africa                                                                    |



|                                                                                                                            |                                                                                                                                                          |                                                                                                                                |
|----------------------------------------------------------------------------------------------------------------------------|----------------------------------------------------------------------------------------------------------------------------------------------------------|--------------------------------------------------------------------------------------------------------------------------------|
| Oelmann, Yvonne<br>Professorship of Geoecology<br>University of Tübingen<br>Germany                                        | Oester, Samantha<br>Environmental Science and Policy<br>George Mason University<br>United States of America (the)                                        | ofir, adva<br>MA STUDENT FOR ENVIROMENTAL STUDIES<br>Israel                                                                    |
| Ofori, Caleb<br>Research Scientist in herpetology<br>CSIR-Forestry Research Scientist<br>Ghana                             | Ogaki, Henrique<br>Psychology<br>Universidade Federal do Rio Grande do Sul<br>Brazil                                                                     | Ogawa, Cynthia<br>Brazil                                                                                                       |
| Ogden, John<br>Emeritus Professor<br>University of South Florida<br>United States of America (the)                         | Ogden, Laura<br>Associate Professor of Anthropology<br>Dartmouth College<br>United States of America (the)                                               | Ogliastro, Mylene<br>Virologist<br>French National Institute for Agronomical Research<br>France                                |
| O'Gorman, Eoin<br>Research Fellow<br>Imperial College London<br>United Kingdom of Great Britain and Northern Ireland (the) | Ogren, Erling<br>Professor<br>Swedish University of Agricultural Sciences<br>Sweden                                                                      | OGURA, SAORI<br>PhD student<br>The University of British Columbia<br>Canada                                                    |
| Oh, Edmund<br>Associate Professor, Environmental Sociology<br>HELP University<br>Malaysia                                  | Ohmer, Michel<br>Postdoctoral Research Associate, Disease ecology,<br>Conservation biology<br>University of Pittsburgh<br>United States of America (the) | Oja, Tatjana<br>senior researcher/plant science<br>University of Tartu<br>Estonia                                              |
| Ojeda, F. Patricio<br>Professor/ Marine Ecology<br>DEpt. of Ecology, Pont. Universidad Católica de Chile<br>Chile          | Ojeda, Ricardo<br>Principal Researcher Ntnl. Council for Sci. & Technol. ,<br>PhD Biology<br>Institute for Aridland Research IADIZA<br>Argentina         | Ojeda Luna, Tatiana<br>Guest Scientist<br>Thünen Institute of International Forestry and Forest<br>Economics<br>Ecuador        |
| OJEH, Vincent<br>Lecturer 2/ Geography, Meteorology & Climate Science<br>Taraba State University, Jalingo<br>Nigeria       | Okan, Yasmina<br>Behavioral Decision Making<br>University of Leeds<br>United Kingdom of Great Britain and Northern Ireland (the)                         | Okayasu, Sana<br>Assessment Coordinator and Policy Researcher<br>Institute for Global Environmental Strategies (IGES)<br>Japan |
| O'Keefe Beck, Kim<br>Ecology & Evolution, PhD<br>PhD Stanford 2007<br>United States of America (the)                       | Okeke, Iruka<br>Professor of Pharmaceutical Microbiology<br>University of Ibadan<br>Nigeria                                                              | okely, Piergiorgio<br>Hydrogeologist/ Water Resources Management<br>DEWNR<br>Australia                                         |
| Okita-Ouma, Benson<br>Conservationists<br>Save The Elephants<br>Kenya                                                      | Okoni-Williams, Arnold<br>Academic, Senior Lecturer<br>University of Sierra Leone<br>Sierra Leone                                                        | Okopinska, Anna<br>professor of physics<br>Jan Kochanowski University in Kielce<br>Poland                                      |

|                                                                                                                                             |                                                                                                                                                                           |                                                                                                                                          |
|---------------------------------------------------------------------------------------------------------------------------------------------|---------------------------------------------------------------------------------------------------------------------------------------------------------------------------|------------------------------------------------------------------------------------------------------------------------------------------|
| Okpa, Chima<br>United States of America (the)                                                                                               | Oksanen, Lauri<br>professor, northern ecology<br>UiT - The Arctic University of Norway<br>Norway                                                                          | Okumura, Mercedes<br>University lecturer (Archaeology)<br>Federal University of Rio de Janeiro<br>Brazil                                 |
| Olajos, Fredrik<br>PhD. Student<br>Umeå University<br>Sweden                                                                                | Olakanmi, Eyitayo Olatunde<br>Senior Lecturer (Manufacturing Engineering)<br>Botswana International University of Science &<br>Technology, Palapye, Botswana.<br>Botswana | OLALERU, FATSUMA<br>LECTURER II/NATURAL RESOURCES CONSERVATION<br>(PRIMATE CONSERVATION AND NUTRITION)<br>UNIVERSITY OF LAGOS<br>Nigeria |
| OLANIYI, OLUWATOBI<br>LECTURER<br>FEDERAL UNIVERSITY OF TECHNOLOGY, AKURE<br>Nigeria                                                        | Oldén, Anna<br>Postdoc researcher in conservation biology<br>University of Jyväskylä<br>Finland                                                                           | Oldfield, Ronald G.<br>Senior Instructor in Biology<br>Case Western Reserve University<br>United States of America (the)                 |
| O'Leary, Heather<br>Professor - Anthropology<br>Washington University in St Louis<br>United States of America (the)                         | O'Leary, Bethan<br>Research Associate<br>University of York<br>United Kingdom of Great Britain and Northern Ireland<br>(the)                                              | O'Leary, Jennifer<br>Researcher in Marine Ecology<br>California Polytechnic State University<br>United States of America (the)           |
| O'Leary, Vincent<br>Environmental Science<br>Drexel University<br>United States of America (the)                                            | Oleas, Nora<br>Associate Professor<br>Universidad Tecnológica Indoamérica<br>Ecuador                                                                                      | Oliet, Juan A. *<br>Professor<br>Universidad Politécnica de Madrid<br>Spain                                                              |
| Olioso, Albert<br>INRA<br>France                                                                                                            | Olivar, M. Pilar<br>Senior Scientist/Marine Biologist<br>Consejo Superior de Investigaciones Científicas<br>Spain                                                         | Oliveira, Adriana<br>doctor and researcher of Botany departament<br>Universidade de Brasilia<br>Brazil                                   |
| Oliveira, Aurélio<br>Student in Energetic Engineering<br>International Institute for Water and Environmental<br>Engineering<br>Burkina Faso | Oliveira, Benedito<br>Genetics<br>USP<br>Brazil                                                                                                                           | Oliveira, Carlos Eduardo Batista<br>Master's Degree Student<br>Universidade Federal de Lavras (UFLA)<br>Brazil                           |
| Oliveira, Eduardo<br>Associate Professor/Pharmaceutical Sciences<br>Federal University of Vales do Jequitinhonha e Mucurí<br>Brazil         | Oliveira, Eliziane<br>Ecologist<br>UFRN<br>Brazil                                                                                                                         | Oliveira, Erika<br>Brazil                                                                                                                |
| Oliveira, Iara<br>Professor Associado IV<br>Universidade Federal da Bahia<br>Brazil                                                         | Oliveira, Iasmin *<br>Master's Degree<br>Universidade Estadual de Feira de Santana<br>Brazil                                                                              | Oliveira, Leonardo<br>Adjunct professor<br>State University of Rio de Janeiro<br>Brazil                                                  |

|                                                                                                |                                                                                                                                                       |                                                                                                                                                                                        |
|------------------------------------------------------------------------------------------------|-------------------------------------------------------------------------------------------------------------------------------------------------------|----------------------------------------------------------------------------------------------------------------------------------------------------------------------------------------|
| oliveira, luiz alberto<br>Curator/Physicist<br>museu do amanhã, rio de janeiro<br>Brazil       | Oliveira, Marcus Vinicius Morais de *<br>Professor / zootechny<br>Universidade Estadual de Mato Grosso do Sul (UEMS)<br>Brazil                        | Oliveira, Margarida<br>economist<br>Associação Defensores da Terra<br>Brazil                                                                                                           |
| Oliveira, Maria-Coleta<br>Professor<br>State University of Campinas<br>Brazil                  | Oliveira, Mariana<br>Researcher<br>UNICAMP<br>Brazil                                                                                                  | Oliveira, Mariana C<br>Full Professor<br>University of Sao Paulo<br>Brazil                                                                                                             |
| Oliveira, Marina<br>Student<br>Universidade Federal de São Paulo<br>Brazil                     | Oliveira, Rafaella Teixeira Maciel<br>PhD Student - Entomology<br>Universidade Federal de Lavras<br>Brazil                                            | Oliveira, Raquel<br>Professora do Curso de Medicina Veterinária - Gestão e Planejamento Ambiental<br>Escola de Veterinária e Zootecnia - Universidade Federal de Goiás - UFG<br>Brazil |
| Oliveira, Renan<br>Brazil                                                                      | Oliveira, Rodrigo<br>Pós-doc<br>Faculdade de Odontologia da USP - Brasil<br>Brazil                                                                    | Oliveira, Sandra<br>PhD student<br>CIBIO<br>Portugal                                                                                                                                   |
| Oliveira, Sarah<br>Professor<br>Universidade Federal de Goiás<br>Brazil                        | Oliveira, Thais<br>PhD researcher - Climate Economics<br>Institute of Technology Sligo<br>Brazil                                                      | Oliveira Brito, Luiz Gustavo<br>Professor, MD, PhD<br>University of Campinas<br>Brazil                                                                                                 |
| Oliveira Cobello, Leticia<br>Msc Student<br>National Institute of Amazonian Research<br>Brazil | OLIVEIRA DE SOUZA FORMIGONI, MARIA LUCIA<br>PROFESSOR AT DEPARTAMENTO DE PSICOBIOLOGIA<br>UNIVERSIDADE FEDERAL DE São Paulo<br>Brazil                 | Oliveira Fernandez, Marina<br>PhD candidate in Zoology<br>Universidade de São Paulo<br>Brazil                                                                                          |
| Oliveira Linton, Maria Angélica<br>Phycology<br>Universidade Federal de Santa Maria<br>Brazil  | OLIVER, LEUDA<br>PESQUISADORA<br>FMUSP<br>Brazil                                                                                                      | Olivera, Beatriz<br>Renovable Energy Researcher<br>UNAM, School of engineering<br>Mexico                                                                                               |
| OLIVERA, RICARDO<br>oceanographer (retired)<br>OLIVERA<br>United States of America (the)       | Oliveras, Imma<br>Lecturer and Researcher on Ecosystems Science<br>University of Oxford<br>United Kingdom of Great Britain and Northern Ireland (the) | OLIVERIO, Marco<br>Professor of Zoology<br>Sapienza University of Rome<br>Italy                                                                                                        |
| olivier, aznar<br>France                                                                       | olivier, frederic<br>Professor, Marine Ecology<br>Museum National d'Histoire Naturelle<br>France                                                      | Olivier, Sandra<br>Senior Experimental Scientist Food Microbiology<br>CSIRO<br>Australia                                                                                               |

|                                                                                                              |                                                                                                                                           |                                                                                                                                                          |
|--------------------------------------------------------------------------------------------------------------|-------------------------------------------------------------------------------------------------------------------------------------------|----------------------------------------------------------------------------------------------------------------------------------------------------------|
| Oljaca, Snezana<br>Full Professor in Agroecology<br>University of Belgrade, Faculty of Agriculture<br>Serbia | Ollerton, Jeff<br>Professor of Biodiversity<br>University of Northampton<br>United Kingdom of Great Britain and Northern Ireland<br>(the) | O'Loughlin, Luke<br>Postdoctoral Fellow<br>The Australian National University<br>Australia                                                               |
| O'Loughlin, Thea<br>Research Officer<br>The Australian National University<br>Australia                      | Olsen, Kent<br>Head of Research and Collections, PhD<br>Natural History Museum Aarhus<br>Denmark                                          | Olsen, Penny<br>Hon. Prof.<br>The Australian National University<br>Australia                                                                            |
| Olshanskyi, Igor<br>M.G. Kholodny Institute of Botany<br>Ukraine                                             | Olson, David<br>Assistant Professor<br>University of Wisconsin-Baraboo/Sauk County<br>United States of America (the)                      | Olson, Sarah<br>Associate Director of Wildlife Health<br>Wildlife Conservation Society<br>United States of America (the)                                 |
| Olsson, Ola<br>Senior lecturer in Conservation Biology<br>Lund University<br>Sweden                          | Olsson, Urban<br>Professor<br>University of Gothenburg<br>Sweden                                                                          | Olyha, Samantha<br>MD-PhD student<br>Yale School of Medicine/Yale Graduate School of Arts and<br>Sciences<br>United States of America (the)              |
| Omar, Wael<br>Professor<br>Cairo University<br>Egypt                                                         | omari, haneen<br>graduate student, biology<br>nmsu<br>United States of America (the)                                                      | O'Meara, Carolyn<br>Associate professor of Linguistics<br>Instituto de Investigaciones Filológicas, Universidad<br>Nacional Autónoma de México<br>Mexico |
| Ometto, Jean Pierre<br>Head of Research Centre<br>National Institute for Space Research<br>Brazil            | Omuombo, Christine<br>Researcher, Geology<br>University of Nairobi<br>Kenya                                                               | Omusula, Sarah<br>Research Scientist<br>Action for Cheetahs in Kenya<br>Kenya                                                                            |
| Onadeko, Abiodun *<br>Lecturer<br>University of Lagos<br>Nigeria                                             | Onaindia, Miren<br>Professor/Ecology<br>University of the Basque Country<br>Spain                                                         | ONDA, DEO FLORENCE<br>SCIENTIFIC RESEARCHER (PhD)<br>ALFRED WEGENER INSTITUTE / THE MARINE SCIENCE<br>INSTITUTE UP-DILIMAN<br>Philippines (the)          |
| O'Neill, Norm<br>Professor<br>Université de Sherbrooke<br>Canada                                             | O'Neill, Tanya<br>Post-doc researcher<br>Waikato University, Hamilton<br>New Zealand                                                      | Onrizal, Onrizal<br>Associate Professor / Ecologist<br>Universitas Sumatera Utara<br>Indonesia                                                           |
| Onstein, Renske<br>Postdoc<br>University of Amsterdam<br>Netherlands (the)                                   | Onstott, Tullis<br>Professor<br>Princeton University<br>United States of America (the)                                                    | Ontiveros, Steven<br>Assistant Professor of Cell Biology<br>Burrell College of Osteopathic Medicine<br>United States of America (the)                    |

|                                                                                                                                                    |                                                                                                                                                                                                                                                   |                                                                                                                                              |
|----------------------------------------------------------------------------------------------------------------------------------------------------|---------------------------------------------------------------------------------------------------------------------------------------------------------------------------------------------------------------------------------------------------|----------------------------------------------------------------------------------------------------------------------------------------------|
| Onyango, Christine<br>Lecturer of aquatic Ecology, PhD Candidate in Marine Biology<br>University of KwaZulu-Natal, South Africa<br>Kenya           | Oomen, Ronald<br>France                                                                                                                                                                                                                           | Ooms, Astra<br>PhD<br>VU<br>Netherlands (the)                                                                                                |
| Oosthuizen, Carel Basson<br>PhD Fellow, Medicinal Plant Sciences<br>University of Pretoria<br>South Africa                                         | Opatowski, Lulla<br>Modelling, infectious disease epidemiology<br>Université de Versailles Saint Quentin<br>France                                                                                                                                | Opitz, Ph.D., Silvia<br>Marine Biology<br>GEOMAR<br>Germany                                                                                  |
| Opohof, Amanda<br>Environment Forester<br>Forest Enterprise Scotland<br>United Kingdom of Great Britain and Northern Ireland (the)                 | Oppel, Steffen<br>Senior Conservation Scientist<br>RSPC Centre for Conservation Science<br>United Kingdom of Great Britain and Northern Ireland (the)                                                                                             | Oppenheim, Gary<br>Lecturer<br>Bangor University<br>United Kingdom of Great Britain and Northern Ireland (the)                               |
| Oppermann, Serpil<br>Professor of English, Environmental Humanities<br>Hacettepe University, Ankara<br>Turkey                                      | Opsal Alseth, Ellinor<br>PhD Candidate<br>University of Exeter<br>United Kingdom of Great Britain and Northern Ireland (the)                                                                                                                      | Orain, Francois<br>Post-doctoral researcher, plasma physics<br>Max-planck Institut fur Plasmaphysik<br>Germany                               |
| Orain, Vincent *<br>Surgeon<br>France                                                                                                              | Oram, Felicity<br>Ecological Processes<br>Universiti Malaysia Sabah<br>Malaysia                                                                                                                                                                   | Orange, Didier *<br>Senior scientist / Ecohydrologist<br>IRD (Institut de Recherche pour le Développement)<br>France                         |
| Orben, Rachael<br>Research Associate<br>Oregon State University<br>United States of America (the)                                                  | Ordiz, Andres<br>PhD in Conservation Biology. Postdoctoral researcher<br>Norwegian University of Life Sciences<br>Norway                                                                                                                          | Ordóñez-Delgado, Leonardo<br>Docente Investigador - Sección de Manejo y Gestión de RRNN<br>Universidad Técnica Particular de Loja<br>Ecuador |
| O'Reilly, Myles<br>Senior Marine Ecologist<br>Scottish Environment Protection Agency<br>United Kingdom of Great Britain and Northern Ireland (the) | Orellana Medina, José Ignacio<br>Phd and MSc in Conservation and Management of Resources Natural/ Research Associate in Wildlife and Ecology Laboratories<br>Department of Biological Sciences and Biodiversity/Universidad de Los Lagos<br>Chile | Orfinger, Alexander<br>Professor of Biology<br>Valencia College<br>United States of America (the)                                            |
| O'Riain, M. Justin<br>Director<br>Institute for Communities and Wildlife in Africa<br>South Africa                                                 | Orimaye, Oluwafemi Jacob *<br>Primate Ecology and Avian Conservation<br>Ekiti State University, Ado-Ekiti<br>Nigeria                                                                                                                              | Orizaola, Germán<br>Researcher / Evolutionary Ecology<br>Uppsala University<br>Sweden                                                        |

|                                                                                                                                                                                                 |                                                                                                                             |                                                                                                                                    |
|-------------------------------------------------------------------------------------------------------------------------------------------------------------------------------------------------|-----------------------------------------------------------------------------------------------------------------------------|------------------------------------------------------------------------------------------------------------------------------------|
| Orlousky, Marian<br>Ecologist (M.S.) Natural Resource Manager<br>Appalachian Trail Conservancy<br>United States of America (the)                                                                | Ornelas Paz, José de Jesús<br>Professor-Food Science<br>Centro de Investigación en Alimentación y Desarrollo A.C.<br>Mexico | Ornetsmueller, Christine<br>Junior Researcher & PhD Student, Land use Science<br>Vrije Universiteit Amsterdam<br>Netherlands (the) |
| ORNOSA, CONCEPCIÓN<br>Professor, Zoology, Entomology<br>Complutense University of Madrid<br>Spain                                                                                               | Orobko, Melissa<br>PhD Student in Biological Sciences<br>Simon Fraser University<br>Canada                                  | Orozco, Esther<br>Emeritus Professor<br>CINVESTAV IPN<br>Mexico                                                                    |
| Orozco, Jesus<br>Professor and Curator, Systematics of Insects<br>Zamorano University<br>Honduras                                                                                               | Orozco-Segovia, Alma<br>Researcher<br>Instituto de Ecología, Universidad Nacional Autónoma de México<br>Mexico              | Orr, Bronwyn<br>Scientific Officer<br>Australia                                                                                    |
| Orr, Caley<br>Assistant Professor, Anatomy & Biological Anthropology<br>Department of Cell & Developmental Biology, University of Colorado School of Medicine<br>United States of America (the) | Orr, Michael<br>Bee researcher<br>Utah State University<br>United States of America (the)                                   | Ort, Brian<br>Senior Geneticist<br>Olofson Environmental, Inc.<br>United States of America (the)                                   |
| ORTAIS, Paul<br>CEO<br>Systèmes Embarqués Aérospatiaux<br>France                                                                                                                                | Ortega, Alix<br>Veterinarian<br>Reserve Africaine de Sigean<br>France                                                       | Ortega, Enrique<br>Teacher/Researcher<br>University of Campinas<br>Brazil                                                          |
| Ortega, Fernando<br>Professor and researcher Medicine and Public Health<br>Universidad San Francisco de Quito<br>Ecuador                                                                        | Ortega, Jorge<br>Professor<br>Instituto Politécnico Nacional<br>Mexico                                                      | Ortega Chinchilla, Jesus Eduardo<br>PhD. Student General Physiology<br>Sao Paulo University<br>Brazil                              |
| Ortega Rosas, Carmen<br>Research Professor<br>Universidad Estatal de Sonora<br>Mexico                                                                                                           | ortega-becerril, jose<br>professor in geology<br>universidad autonoma de madrid<br>Spain                                    | Ortega-Olivencia, Ana<br>Professor of Plant Sciences<br>University of Extremadura<br>Spain                                         |
| ORTEGA-SALAS, ARMANDO ADOLFO *<br>Ph D MARINE BIOLOGY<br>UNIVERSIDAD NACIONAL AUTÓNOMA DE MEXICO<br>Mexico                                                                                      | Ortega-Solis, Gabriel<br>Executive Secretary of Sustainability Committee<br>Universidad Austral de Chile<br>Chile           | Ortega-Villasante, Cristina<br>Assistant Professor<br>Universidad Autónoma de Madrid<br>Spain                                      |
| ORTELLS, RAQUEL<br>ASSISTANT PROFESSOR<br>UNIVERSITY OF VALENCIA<br>Spain                                                                                                                       | Orth, Donald<br>Professor<br>Virginia Tech University<br>United States of America (the)                                     | Ortiz, Orlando *<br>Researcher<br>University of Panama<br>Panama                                                                   |

|                                                                                                                               |                                                                                                                                                                                             |                                                                                                                                                 |
|-------------------------------------------------------------------------------------------------------------------------------|---------------------------------------------------------------------------------------------------------------------------------------------------------------------------------------------|-------------------------------------------------------------------------------------------------------------------------------------------------|
| Ortiz, Rafael<br>Medicine<br>University of Sao Paulo<br>Brazil                                                                | Ortiz Muñoz, Jenny Amanda<br>Consultant/Developmental Psychology<br>Universidade Federal do Rio Grande do Sul<br>Colombia                                                                   | Ortiz-Ramirez, Carlos<br>Plant Genetics and Molecular Biology<br>New York University<br>United States of America (the)                          |
| Osbaldiston, Nick<br>Sociologist<br>James Cook University<br>Australia                                                        | Osborn, Hayward<br>Meteorologist<br>Retired<br>New Zealand                                                                                                                                  | Osborne, Matthew<br>Research Fellow<br>Stockholm Environment Institute (SEI)<br>Sweden                                                          |
| Osborne, Michael<br>Professor of History of Science<br>Oregon State University<br>United States of America (the)              | Osei, Richard<br>PhD Candidate, Forest Science<br>Universite Catholique de Louvain<br>Belgium                                                                                               | Osemwegie, Isimemen *<br>Researcher/hydrogeology<br>West African Science Service on Climate Change and<br>Adapted Land Use<br>Côte d'Ivoire     |
| Osgood, Geoffrey<br>PhD student in Biology<br>University of Victoria<br>Canada                                                | Oshant Hawkins, Trica<br>Conservation Biology / Environmental Education<br>Little White Salmon Biodiversity Reserve / Environmental<br>Education Exchange<br>United States of America (the) | O'Shaughnessy, Kathryn<br>PhD student - coastal ecology<br>Plymouth University<br>United Kingdom of Great Britain and Northern Ireland<br>(the) |
| Oshun, Jasper<br>Asst. Professor of Geology<br>Humboldt State<br>United States of America (the)                               | Osier-Owusu, Yaw<br>Executive Director<br>Conservation Alliance International<br>Ghana                                                                                                      | Osofsky, Steven<br>Jay Hyman Professor of Wildlife Health & Health Policy<br>Cornell University<br>United States of America (the)               |
| Osorio, Daniel<br>College professor<br>Universidad Javeriana<br>Colombia                                                      | Osorio, Víctor<br>PhD Student / Freshwater Ecology<br>CEAB - CSIC<br>Spain                                                                                                                  | Ossa, Carmen Gloria<br>Evolutive Biology<br>Pontificia Universidad Católica de Chile<br>Chile                                                   |
| Ossiboff, Robert<br>Assistant Clinical Professor<br>University of Illinois Urbana-Champaign<br>United States of America (the) | Ossola, Alessandro<br>Research Coordinator, Centre for Smart Green Cities<br>Macquarie University, Sydney<br>Australia                                                                      | Öst, Markus<br>Academy Lecturer in Environmental Biology<br>Åbo Akademi University<br>Finland                                                   |
| Ostergren, Carol<br>geologist/geographer<br>US Geological Survey<br>United States of America (the)                            | Ostermann, Ole P.<br>Policy co-ordinator biodiversity and ecosystem services<br>European Commission's Joint Research Centre (JRC)<br>Italy                                                  | Ostermann-Kelm, Stacey<br>Ecologist and Program Manager<br>National Park Service<br>United States of America (the)                              |

|                                                                                                                                                                     |                                                                                                                                                                |                                                                                                                                             |
|---------------------------------------------------------------------------------------------------------------------------------------------------------------------|----------------------------------------------------------------------------------------------------------------------------------------------------------------|---------------------------------------------------------------------------------------------------------------------------------------------|
| Ostrensky, Antonio<br>Professor / Aquaculture<br>Federal University of Paraná<br>Brazil                                                                             | Ostroff, Jenny<br>Biological Scientist<br>United States of America (the)                                                                                       | O'Sullivan, Jane<br>Honorary Senior Research Associate, School of<br>Agriculture and Food Sciences<br>University of Queensland<br>Australia |
| otani, diana<br>design<br>United States of America (the)                                                                                                            | Otaño, Silvia Haydeé<br>Oceanographer<br>Argentina                                                                                                             | Otero, Daniel<br>Associate Prof., Mathematics<br>Xavier University<br>United States of America (the)                                        |
| Otero, Olga *<br>Maitre de Conférences - Fish paleontology and evolution<br>Université de Poitiers<br>France                                                        | Otero, Rodrigo A.<br>paleontologist<br>Unversidad de Chile<br>Chile                                                                                            | Oteros-Rozas, Elisa<br>Postdoctoral Researcher<br>Universidad Pablo de Olavide<br>Spain                                                     |
| O'Toole, Christopher<br>Honorary Research Associate<br>Oxford University Museum of Natural History<br>United Kingdom of Great Britain and Northern Ireland<br>(the) | Otta, Débora<br>Agroecology<br>Escas/Ipe<br>Brazil                                                                                                             | Ottenburghs, Jente<br>Postdoc<br>Karolinska Institutet, Stockholm, Sweden<br>Belgium                                                        |
| Otter, Nina<br>PhD student in mathematics<br>University of Oxford / Alan Turing Institute<br>United Kingdom of Great Britain and Northern Ireland<br>(the)          | Otto, Paulo A.<br>(Full) Professor (retired)<br>Department of Genetics, Univversidade de Sao Paulo<br>Brazil                                                   | Otto, Sarah<br>Professor<br>University of British Columbia<br>Canada                                                                        |
| Otoni-Teatini Salles, Alexandre<br>Research Professor in Economics<br>Federal University of Espirito Santo<br>Brazil                                                | Otuokon, Susan<br>Manager<br>Blue & John Crow Mtns National Park<br>Jamaica                                                                                    | Otwoma, Levy<br>Research scientist<br>Leibniz Centre for Tropical Marine Research<br>Kenya                                                  |
| Ouboter, Dimitri<br>Ecologist & Evolutionary Biologist<br>Suriname                                                                                                  | Ouboter, Paul<br>Director National Zoological Collection of Suriname<br>Anton de Kom University of Suriname<br>Suriname                                        | Oudman, Thomas<br>Biologist<br>Royal Netherlands Institute for Sea Research<br>Netherlands (the)                                            |
| Ouedraogo, Issoufou<br>PhD student<br>Université catholique de Louvain<br>Belgium                                                                                   | Ouedraogo, Jean-Paul<br>Research Associate<br>Concordia University<br>Canada                                                                                   | Ouisse, Tiphaine<br>PhD in Ecology<br>University of Rennes 1<br>France                                                                      |
| Ourcival, Jean-Marc<br>Research engineer/Forest Ecophysiology<br>CNRS<br>France                                                                                     | Outwater, Anne H.<br>PhD, Head of Department of Community Health Nursing<br>Muhimbili University of Health and Allied Sciences<br>Tanzania, United Republic of | Ouvrard, Pierre<br>PhD candidate in agronomy<br>Université catholique de Louvain<br>Belgium                                                 |



|                                                                                                                                                                |                                                                                                                                                                   |                                                                                                                       |
|----------------------------------------------------------------------------------------------------------------------------------------------------------------|-------------------------------------------------------------------------------------------------------------------------------------------------------------------|-----------------------------------------------------------------------------------------------------------------------|
| <p>Ovadia, Ofer<br/>Full Professor Department of Life Sciences / Evolutionary Ecology<br/>Ben-Gurion University of the Negev<br/>Israel</p>                    | <p>Overbeck, Gerhard<br/>Professor, Department of Botany<br/>Universidade Federal do Rio Grande do Sul<br/>Brazil</p>                                             | <p>Overton, Jake<br/>Kafue Program Manager<br/>Panthera<br/>Zambia</p>                                                |
| <p>Oviedo, Daniel<br/>Librarian<br/>Universidad Nacional Autónoma de México<br/>Mexico</p>                                                                     | <p>Owen, Robert<br/>President, Board of Directors<br/>Para La Tierra<br/>Paraguay</p>                                                                             | <p>Owen, Samuel<br/>Marine Ecologist<br/>Royal Alberta Museum<br/>Canada</p>                                          |
| <p>Owens, Jackson<br/>Ecologist<br/>Griffith University<br/>Australia</p>                                                                                      | <p>Owens, Leigh<br/>Associate Professor of Microbiology<br/>James Cook University<br/>Australia</p>                                                               | <p>Owley, Jessica<br/>Professor of Environmental Law<br/>SUNY Buffalo<br/>United States of America (the)</p>          |
| <p>Oyama, Ken<br/>Full time researcher<br/>UNAM<br/>Mexico</p>                                                                                                 | <p>Ozkaya, Ali<br/>Assistant Professor<br/>İzmir University of Economics Faculty of Medicine<br/>Turkey</p>                                                       | <p>P, FRANCIS *<br/>SENIOR RESEARCH FELLOW, MATHEMATICS<br/>PONDICHERRY UNIVERSITY<br/>India</p>                      |
| <p>Paap, Trudy<br/>Post doctoral fellow, Forest Pathology<br/>Forestry &amp; Agricultural Biotechnology Institute, University of Pretoria<br/>South Africa</p> | <p>Paasivaara, Antti<br/>Research Scientist<br/>Natural Resources Institute Finland<br/>Finland</p>                                                               | <p>Pabijan, Maciej<br/>assistant professor/biological sciences<br/>Jagiellonian University<br/>Poland</p>             |
| <p>Pacagnella, Rodolfo<br/>Assistent Professor<br/>UNICAMP<br/>Brazil</p>                                                                                      | <p>Pacheco Romero, Manuel<br/>PhD Student<br/>Andalusian Centre for the Assessment and Monitoring of Global Change (CAESCG) - University of Almería<br/>Spain</p> | <p>Pacherres, Cesar O.<br/>Dr. Candidate<br/>Alfred Wegener Institute for Polar and Marine Research<br/>Germany</p>   |
| <p>Paci, Giulia<br/>PhD student<br/>European Molecular Biology Laboratory<br/>Germany</p>                                                                      | <p>Pacifico, Ricardo<br/>pHD Student<br/>Maringá State University<br/>Brazil</p>                                                                                  | <p>Packauskas, Richard<br/>Professor of Biology<br/>Fort Hays State University<br/>United States of America (the)</p> |
| <p>Pacoureaux, Nathan<br/>PhD student<br/>Marine Predator Team - Chizé Centre for Biological Studies - UMR 7372 CNRS<br/>France</p>                            | <p>Paczkowska, Joanna<br/>Ecology<br/>Umea University<br/>Sweden</p>                                                                                              | <p>Padberg, Julia<br/>Professor, Computer Science<br/>Hamburg University of Applied Sciences<br/>Germany</p>          |
| <p>Padhye, Sameer<br/>Postdoctoral Researcher<br/>India</p>                                                                                                    | <p>Padial, André<br/>Professor<br/>UFPR<br/>Brazil</p>                                                                                                            | <p>Padilha, Danira<br/>PhD Candidate<br/>Universidade Federal de Goiás<br/>Brazil</p>                                 |

|                                                                                                                 |                                                                                                                                         |                                                                                                                                                                                            |
|-----------------------------------------------------------------------------------------------------------------|-----------------------------------------------------------------------------------------------------------------------------------------|--------------------------------------------------------------------------------------------------------------------------------------------------------------------------------------------|
| Padilla-Gamino, Jacqueline<br>Assistant Professor<br>University of Washington<br>United States of America (the) | Padua, Claudio<br>Rector<br>Escola Superior de Conservação e Sustentabilidade<br>ESCAS/IPÊ<br>Brazil                                    | Pádua Tavares de Freitas, Tatiana *<br>Veterinarian<br>Oswaldo Cruz Fundation<br>Brazil                                                                                                    |
| Padula, Vinicius<br>Brazil                                                                                      | Páez, Nadia<br>Researcher<br>Pontificia Universidad Católica del Ecuador<br>Ecuador                                                     | Páez, Rosaura<br>Academic Technician<br>Universidad Nacional Autónoma de México<br>Mexico                                                                                                  |
| Paez Crespo, Elsy Johanna<br>PhD. Student<br>University of Texas at Austin<br>Colombia                          | Páez de la Cadena, María *<br>Professor/Biochemistry<br>University of Vigo<br>Spain                                                     | Page, Dale<br>Masters student<br>University of Liverpool<br>United Kingdom of Great Britain and Northern Ireland<br>(the)                                                                  |
| Page, Tessa<br>Australia                                                                                        | Page-Nicholson, Samantha<br>Senior Science Officer<br>Endangered Wildlife Trust<br>South Africa                                         | Pagès, Jordi<br>Postdoctoral research fellow (ecology)<br>Bangor University<br>United Kingdom of Great Britain and Northern Ireland<br>(the)                                               |
| Pagliosa, Paulo *<br>Professor<br>Universidade Federal de Santa Catarina<br>Brazil                              | Pahad, Govan<br>Ecology<br>University of Johannesburg<br>South Africa                                                                   | Paillard, Christine<br>Director of Research DR2 CNRS / Marine Biologist<br>Laboratory of Environmental Marine Sciences (LEMAR),<br>Insititut Universitary European Marine (IUEM)<br>France |
| Paillet, Yoan<br>Research Associate<br>Irstea, UR EFNO, Nogent sur Vernisson<br>France                          | Pain, Deborah<br>Director of Conservation<br>Wildfowl & Wetlands Trust<br>United Kingdom of Great Britain and Northern Ireland<br>(the) | Paini, Dean<br>Principal Research Scientists, Ecologist<br>CSIRO<br>Australia                                                                                                              |
| Painter, Luke<br>Ecologist, teacher, researcher<br>Oregon State University<br>United States of America (the)    | Paiva, Paulo Cesar<br>Associate Professor of Zoology<br>Federal University of Rio de Janeiro<br>Brazil                                  | Paiz Medina, Lucia<br>Reseach assistant<br>University of Central America<br>Nicaragua                                                                                                      |
| Pajdak-Stós, Agnieszka<br>Ecology<br>Institute of Environmental Sciences, Jagiellonian<br>University<br>Poland  | Palacio, Facundo<br>Doctor in Biological Sciences<br>Museo de La Plata, Universidad Nacional de La Plata<br>Argentina                   | Palacio, Sara<br>Hired researcher / Plant Ecology<br>CSIC<br>Spain                                                                                                                         |

|                                                                                                                                                      |                                                                                                                                                    |                                                                                                                                                                |
|------------------------------------------------------------------------------------------------------------------------------------------------------|----------------------------------------------------------------------------------------------------------------------------------------------------|----------------------------------------------------------------------------------------------------------------------------------------------------------------|
| Palacios, Daniel<br>Assistant Professor<br>Oregon State University<br>United States of America (the)                                                 | Palacios, Rocio<br>General Co-Coordinator<br>Andean Cat Alliance<br>Argentina                                                                      | Palacios-Bianchi, Pilar<br>Environmental Biologist, Master of Wildlife Conservation<br>Chile                                                                   |
| Palau, Jose Luis<br>Researcher-Meteorologist. Project and Modelling<br>Coordinator<br>Mediterranean Center for Environmental Studies (CEAM)<br>Spain | Palazzo, Guido<br>Professor of Business Ethics<br>University of Lausanne<br>Switzerland                                                            | Palazzo, Reginaldo<br>Professor, EE<br>UNICAMP<br>Brazil                                                                                                       |
| Palen, Wendy<br>Associate Professor of Biology<br>Simon Fraser University<br>Canada                                                                  | PALERO, FERRAN<br>POSTDOC<br>CEAB<br>Spain                                                                                                         | Palet, Cristina<br>Chemistry, Professor and Researcher<br>Universitat Autònoma de Barcelona (UAB)<br>Spain                                                     |
| Pallarés, Susana<br>Research assistant Zoology<br>Universidad de Castilla-La Mancha<br>Spain                                                         | Pallewatta, Nirmalie<br>Senior Lecturer Zoology and Environment Sciences<br>University of Colombo<br>Sri Lanka                                     | Palma, Ana<br>PhD, Tropical Ecology<br>Centre for Tropical Environmental and Sustainability<br>Science, James Cook University, Cairns, Australia.<br>Australia |
| Palma, Eduardo *<br>Professor of Evolution<br>Pontificia Universidad Católica de Chile<br>Chile                                                      | Palma, Laura<br>Research Assistant<br>Archie Carr Center for sea Turtle Research at the<br>University of Florida<br>United States of America (the) | Palma, Luís<br>Auxiliary Researcher, conservation biology<br>CIBIO/InBIO, Research Centre in Biodiversity and Genetic<br>Resources<br>Portugal                 |
| Palma-Guerrero, Javier<br>Senior Scientific Assistant<br>ETH Zurich<br>Switzerland                                                                   | Palmas, Pauline<br>PhD student in ecology and conservation biology<br>IRD Nouméa<br>New Caledonia                                                  | Palmeira, Francesca<br>Researcher<br>Jaguar Juruena<br>Brazil                                                                                                  |
| Palmeirim, Ana Filipa<br>Universidade Federal do Rio de Janeiro<br>Brazil                                                                            | Palmeirim, Jorge<br>Associate Professor / Biology (Ecology)<br>University of Lisbon, Faculty of Sciences<br>Portugal                               | Palmer, David A.<br>Associate Professor, Anthropology<br>University of Hong Kong<br>Hong Kong                                                                  |
| Palmer, Guy<br>Retired Nature Conservation Ecologist<br>CapeNature<br>South Africa                                                                   | Palmero-Iniesta, Marina<br>Predoctoral researcher<br>CREAF<br>Spain                                                                                | Palmieri, Luciano<br>Honorary Fellow<br>University of Wisconsin<br>United States of America (the)                                                              |
| Palminteri, Suzanne<br>Researcher / Writer - Biodiversity<br>United States of America (the)                                                          | Palmstrom, Nancy<br>Program Manager/Aquatic Ecologist<br>United States of America (the)                                                            | Palo, R. Thomas<br>Science advisor, Professor<br>Swedish University of Agricultural Sciences<br>Sweden                                                         |

|                                                                                                                   |                                                                                                                                                          |                                                                                                                          |
|-------------------------------------------------------------------------------------------------------------------|----------------------------------------------------------------------------------------------------------------------------------------------------------|--------------------------------------------------------------------------------------------------------------------------|
| Palomar, Gemma<br>Doctor<br>University of Oviedo<br>Spain                                                         | Palomares Accardo Filho, Marco Antonio<br>Botanist<br>Jardim Botânico do Rio de Janeiro<br>Brazil                                                        | Palomera, Isabel<br>Research Scientist<br>CSIC<br>Spain                                                                  |
| Palomo, Ignacio<br>Postdoc researcher in sustainability science<br>BC3<br>Spain                                   | Panazio, Cristiano<br>Assistant Professor<br>University of São Paulo<br>Brazil                                                                           | Pancia, Matthew<br>Mathematics<br>United States of America (the)                                                         |
| Pandey, Gunjan<br>Research Scientist / Environmental Microbiologist<br>Australia                                  | Panepucci, Ezequiel<br>Software Engineer<br>Paul Scherrer Institut<br>Switzerland                                                                        | Paniagua-Zambrana, Narel<br>Associate research<br>Herbario Nacional de Bolivia<br>Bolivia (Plurinational State of)       |
| Panigada, Simone<br>President<br>Tethys Research Institute<br>Italy                                               | Panisi, Martina<br>Conservation Biology student<br>Lisbon University - Faculty of Science<br>Portugal                                                    | Panitz, Eric<br>Paaarasitologist<br>United States of America (the)                                                       |
| Panjang, Elisa<br>PhD Candidate<br>Cardiff University<br>Malaysia                                                 | Pankhania, Bharat<br>Public Health Medicine. Senior Clinical Lecturer<br>EXETER UNIVERSITY<br>United Kingdom of Great Britain and Northern Ireland (the) | Pannell, Jennifer L<br>Postdoctoral Research Fellow, Applied Science<br>Auckland University of Technology<br>New Zealand |
| Pannell, John<br>Professor in Evolutionary Biology<br>University of Lausanne<br>Switzerland                       | Pansonato, Marcelo<br>PhD student in Ecology<br>Universidade de São Paulo<br>Brazil                                                                      | Panteleit, Joern<br>PhD Student<br>University of Koblenz-Landau<br>Germany                                               |
| PANzDA, Dr. J P *<br>Professor of Mathematics<br>VSSUT BURLA Odisha-768018<br>India                               | Panzetta, Maria Emilia<br>Doctoral fellow<br>CIBICI-CONICET<br>Argentina                                                                                 | Paolini, Kelsey<br>Masters Student<br>United States of America (the)                                                     |
| Paolucci, Lucas<br>Ecologist<br>Amazon Environmental Research Institute<br>Brazil                                 | Paparrizos, Spyridon<br>Postdoc researcher<br>LSCE<br>France                                                                                             | Papiol Nieves, Vanesa<br>Postdoctoral researcher<br>Universidad Nacional Autónoma de México<br>Mexico                    |
| Papoulias, Diana<br>Aquatic Toxicology and Fish Biology<br>E-Tech International<br>United States of America (the) | Pappa, Gerlinde<br>Safety Assessor / Toxicology<br>Beiersdorf AG<br>Germany                                                                              | Pappa, Wolfgang<br>PhD Student<br>Senckenberg Biodiversity and Climate Research Center<br>Frankfurt<br>Germany           |

|                                                                                                                         |                                                                                                                                              |                                                                                                                                       |
|-------------------------------------------------------------------------------------------------------------------------|----------------------------------------------------------------------------------------------------------------------------------------------|---------------------------------------------------------------------------------------------------------------------------------------|
| Paquet, Paul<br>Professor & Senior Scientist<br>University of Victoria & Raincoast Conservation<br>Foundation<br>Canada | Parada, Andrés<br>Postdoctoral researcher<br>Instituto Ciencias Ambientales y Evolutivas<br>Chile                                            | Parang, Masood<br>Associate Dean<br>Tickle College of Engineering, University of Tennessee<br>United States of America (the)          |
| Parapar, Julio<br>Associate Professor<br>Universidade da Coruña<br>Spain                                                | Pardee, Marsha<br>Marine Ecology Consultant<br>Turks and Caicos Islands (the)                                                                | Pardo, Adara<br>Postdoctoral researcher<br>University of Extremadura<br>Spain                                                         |
| Pardo, Christine<br>Doctoral Student<br>University of Miami<br>United States of America (the)                           | Pardo, Deborah<br>Population modeller<br>British Antarctic Survey<br>France                                                                  | Pardo, Guillermo<br>Post-doc researcher Climate Change Mitigation<br>Basque Centre for Climate Change<br>Spain                        |
| Pardo, Jose M<br>Research Professor in Biology<br>CSIC - Spanish National Research Council<br>Spain                     | Pardo, Maria Juliana<br>Biologist<br>Universidad de Los Andes<br>Colombia                                                                    | Pardo, Sebastian<br>Postdoctoral Research Fellow, Biology<br>Dalhousie University<br>Canada                                           |
| Pardos, Fernando<br>Full Professor. Zoology.<br>Universidad Complutense de Madrid<br>Spain                              | Paredes, Inés<br>Biotechnology Engineer<br>Ecuador                                                                                           | Pareja, Daniela<br>Biologist<br>PNUD<br>Ecuador                                                                                       |
| Parejo, Deseada<br>Researcher<br>University of Extremadura<br>Spain                                                     | Parejo-Farnés, Clara<br>PhD candidate<br>Dpt. Biología Vegetal y Ecología. Universidad de Sevilla<br>Spain                                   | Parent, Christine<br>Assistant Professor in Evolutionary Biology<br>University of Idaho<br>United States of America (the)             |
| Pargana, Katerina<br>Ph.D.<br>Greece                                                                                    | Parhiala, Kristy<br>MSc. Environmental Biology Student<br>Utrecht University<br>Netherlands (the)                                            | Paris, Josephine<br>Postdoctorate researcher<br>University of Exeter<br>United Kingdom of Great Britain and Northern Ireland<br>(the) |
| Paris, Margot<br>Postdoc in evolutionary biology<br>University of Fribourg<br>Switzerland                               | Parise Pinto, Ângelo<br>Professor/Researcher in comparative biology<br>Federal University of Paraná (UFPR)<br>Brazil                         | Parisien, Marc-André<br>Research scientist, wildland fire<br>Natural Resources Canada, Canadian Forest Service<br>Canada              |
| Park, Austin<br>Energy Resources Engineering Student<br>Stanford<br>United States of America (the)                      | Park, Kirsty<br>Professor of Conservation Science<br>University of Stirling<br>United Kingdom of Great Britain and Northern Ireland<br>(the) | Parker, Erica<br>Medical doctor / PhD student<br>University of Western Australia<br>Australia                                         |

|                                                                                                                                                                    |                                                                                                                                                                                                                                                           |                                                                                                                                                  |
|--------------------------------------------------------------------------------------------------------------------------------------------------------------------|-----------------------------------------------------------------------------------------------------------------------------------------------------------------------------------------------------------------------------------------------------------|--------------------------------------------------------------------------------------------------------------------------------------------------|
| Parker, Ingrid<br>Professor<br>University of California, Santa Cruz<br>United States of America (the)                                                              | Parker, Jenna<br>Ecology and Fish, Wildlife and Conservation Biology<br>Colorado State University<br>United States of America (the)                                                                                                                       | Parkinson, John<br>Postdoctoral Researcher<br>Oregon State University<br>United States of America (the)                                          |
| Parkinson, John<br>Professor of Behavioural Neuroscience and Head of Department<br>Bangor University<br>United Kingdom of Great Britain and Northern Ireland (the) | Parmentier, Koen<br>Marine environmental chemist<br>Royal Belgian Institute for Natural Sciences<br>Belgium                                                                                                                                               | parmesan, camille<br>Professor, climate change biologist<br>University of Plymouth<br>United Kingdom of Great Britain and Northern Ireland (the) |
| Parodi, Mauro<br>Full Professor-Applied mathematical modeling<br>University of Genoa - DITEN<br>Italy                                                              | Parpinelli, Mary *<br>PhD obstetrician<br>Universitário ofbCampinas<br>Brazil                                                                                                                                                                             | Parr, Thomas<br>Postdoctoral Researcher in Ecology<br>University of Oklahoma<br>United States of America (the)                                   |
| Parraga-Ramirez, Pablo<br>Senior Design Coordinator/Instructor (Engineering)<br>central Michigan University<br>United States of America (the)                      | Parret, Annabel<br>Staff scientist<br>European Molecular Biology Laboratory (EMBL)<br>Germany                                                                                                                                                             | Parrish, Kimberly<br>Residential Faculty, (Biology)<br>Glendale Community College<br>United States of America (the)                              |
| Parrish, Rebecca<br>PHD student<br>Brunel university<br>United Kingdom of Great Britain and Northern Ireland (the)                                                 | Parrott, Lael<br>Professor, Sustainability<br>The University of British Columbia<br>Canada                                                                                                                                                                | Parrott, Marissa<br>Reproductive and Conservation Biologist<br>Zoos Victoria<br>Australia                                                        |
| Parry, Greg<br>Marine Ecology<br>Marine Ecological Solutions<br>Australia                                                                                          | Parsch, Christoph<br>Consultant UNEP CMS/Sharks MOU<br>Germany                                                                                                                                                                                            | Parsons, David<br>Wildlife Ecology<br>The Rewilding Institute<br>United States of America (the)                                                  |
| Parsons, E.C.M.<br>Associate Professor in Marine Conservation<br>George Mason University<br>United States of America (the)                                         | Pärtel, Meelis<br>Professor of botany<br>Universiyt of Tartu<br>Estonia                                                                                                                                                                                   | PASA, MARIA CORETTE *<br>PhD Etnobotânica<br>UFMT<br>Brazil                                                                                      |
| Pasanen-Mortensen, Marianne<br>Postdoctoral researcher<br>Stockholm university<br>Sweden                                                                           | PASCAL, MASILYA MULUNGULA *<br>General Director/ Researcher in Limnology<br>Centre de Recherche en Hydrobiologie-Uvira (DRC)/ Unité d'Enseignement et de Recherche en Hydrobiologie Appliquée (ISP-Bukavu, DRC)<br>Congo (the Democratic Republic of the) | Paseka, Rachel<br>PhD Candidate, Ecology and Evolution<br>Rutgers University<br>United States of America (the)                                   |

|                                                                                                                                  |                                                                                                                                           |                                                                                                                                                     |
|----------------------------------------------------------------------------------------------------------------------------------|-------------------------------------------------------------------------------------------------------------------------------------------|-----------------------------------------------------------------------------------------------------------------------------------------------------|
| PASHA, SHAIK VAZEED<br>RESEARCHER<br>NATIONAL REMOTE SENSING CENTRE<br>India                                                     | Pashova, Lyubka<br>Assoc. Prof.<br>National Institute of Geophysics, Geodesy and Geography<br>- Bulgarian Academy of Sciences<br>Bulgaria | Pasotti, Francesca<br>Post Doc fellow<br>Ghent University<br>Belgium                                                                                |
| Passamani, Marcelo<br>Professor of Ecology<br>Federal University of Lavras<br>Brazil                                             | Passerini, Mariana<br>Biology<br>IFPA - Federal Institute of Pará<br>Brazil                                                               | Passoni, Gioele<br>DPhil candidate in Conservation science<br>University of Oxford<br>United Kingdom of Great Britain and Northern Ireland<br>(the) |
| Passos, Daniel<br>Associate Professor<br>Universidade Federal Rural do Semi-Árido - UFERSA<br>Brazil                             | Passos, Paulo<br>Adjunct Professor<br>Museu Nacional<br>Brazil                                                                            | Pastana, Murilo<br>Graduate Student<br>Museu de Zoologia da Universidade de São Paulo - USP<br>Brazil                                               |
| Paster, Amir<br>Senior Lecturer<br>Tel Aviv University<br>Israel                                                                 | Pastey, Manoj<br>Associate Professor, Biomedical Sciences<br>Oregon State University<br>United States of America (the)                    | Pastor, Francisco<br>Researcher/Meteorology<br>Fundación CEAM<br>Spain                                                                              |
| Pastor, Lucie<br>Researcher<br>Ifremer<br>France                                                                                 | Pastor, Manuel<br>Head of Pharmacoinformatics research group<br>University Pompeu Fabra<br>Spain                                          | Pataccini, Marianela<br>PhD student<br>IFREMER-French Research Institute for Exploitation of the<br>Sea<br>France                                   |
| Patel, Malkeshkumar<br>Postdoctoral Researcher, Korean Research Fellow<br>Incheon National University<br>Korea (the Republic of) | Patel, Prashantkumar<br>Mathematics<br>St. Xavier's College (Autonomous), Ahmedabad<br>India                                              | Patel, Riddhi<br>PhD student in Evolutionary Genetics<br>Leibniz Institute For Zoo and Wildlife Research, Freie<br>University, Berlin<br>Germany    |
| Paterson, James<br>PhD Student (Biology)<br>University of Ottawa<br>Canada                                                       | Paterson de Heer, Chloe<br>Marine Ecology<br>Australia                                                                                    | Patrice, BREHMER<br>Researcher<br>IRD/Ocean/Lemar - ISRA/CRODT<br>Senegal                                                                           |
| Patricio, Ana R.<br>PhD researcher<br>University of Exeter and MARE<br>Portugal                                                  | Patrick, Sean<br>Postdoctoral Fellow - Environmental Health<br>University of Pretoria<br>South Africa                                     | Pattanavibool, Anak<br>WCS Thailand Country Director<br>Wildlife Conservation Society<br>Thailand                                                   |
| Patterson, Bruce<br>Curator<br>Field Museum of Natural History<br>United States of America (the)                                 | Patterson, David J.<br>Professor Emeritus<br>The University of Sydney<br>Australia                                                        | Patterson, Lucy<br>BCom(Hons) Marketing Management<br>University of Otago<br>New Zealand                                                            |

|                                                                                                                                                                        |                                                                                                                                         |                                                                                                                                            |
|------------------------------------------------------------------------------------------------------------------------------------------------------------------------|-----------------------------------------------------------------------------------------------------------------------------------------|--------------------------------------------------------------------------------------------------------------------------------------------|
| <p>Patykowski, John<br/>Environmental scientist<br/>Deakin University<br/>Australia</p>                                                                                | <p>Pätzig, Marlene<br/>Doctor of Natural Science / Freshwater Ecology<br/>ZALF e.V., Institute of Landscape Hydrology<br/>Germany</p>   | <p>Pauchard, Anibal<br/>Professor in Ecology<br/>Universidad de Concepción<br/>Chile</p>                                                   |
| <p>Pauers, Michael<br/>Adjunct Curator of Fishes and Ichthyology Research<br/>Fellow<br/>Milwaukee Public Museum<br/>United States of America (the)</p>                | <p>Paul, Allannah<br/>Postdoctoral Researcher<br/>GEOMAR Helmholtz Centre for Ocean Research Kiel<br/>Germany</p>                       | <p>PAUL, ELLEN<br/>Exec. Director<br/>Ornithological Council<br/>United States of America (the)</p>                                        |
| <p>Paul, Sanjana<br/>Electrical Engineering<br/>United States of America (the)</p>                                                                                     | <p>Paula, Joana D'Arc<br/>Professor and researcher<br/>Universidade Nilton Lins<br/>Brazil</p>                                          | <p>Paulay, Gustav<br/>Curator<br/>University of Florida<br/>United States of America (the)</p>                                             |
| <p>Paule, Sara<br/>Director of Sponsored Programs and Foundation Relations<br/>Earlham College<br/>United States of America (the)</p>                                  | <p>Pauleit, Stephan<br/>Professor/ Landscape Planning<br/>Technical University of Munich<br/>Germany</p>                                | <p>Pauly, Andrea<br/>Associate Programme Officer - Sharks MOU<br/>UNEP/CMS<br/>Germany</p>                                                 |
| <p>Pauly, Daniel<br/>Professor of Fisheries<br/>University of British Columbia<br/>Canada</p>                                                                          | <p>Pauné, Ferran<br/>Ecologist<br/>Crop and Forestry Sciences Dpt. University of Lleida<br/>Spain</p>                                   | <p>PAUPY, Christophe<br/>Researcher / Medical Entomology- Emerging Diseases<br/>Institut de Recherche pour le Développement<br/>France</p> |
| <p>Paustian, Megan<br/>United States of America (the)</p>                                                                                                              | <p>Pauwels, Bregje<br/>postdoctoral fellow<br/>Australian National University<br/>Australia</p>                                         | <p>Pauwels, Julie<br/>PhD student<br/>National Museum of Natural History of Paris<br/>France</p>                                           |
| <p>Pavei, Ana Flavia<br/>Master's in Plant Genetic Resources<br/>UFSC<br/>Brazil</p>                                                                                   | <p>Pavlushchick, Tatiana<br/>Researcher, ornithologist<br/>Center for biological resources, Belarus academy of sciences<br/>Belarus</p> | <p>Pavón Paneque, Altai Carlos<br/>PhD student in Marine biology<br/>University of Seville<br/>Spain</p>                                   |
| <p>Pawlik, Joseph<br/>Frank Hawkins Kenan Distinguished Professor of Marine Biology<br/>University of North Carolina Wilmington<br/>United States of America (the)</p> | <p>Pawluk, Kylee A.<br/>University Lecturer<br/>University of Victoria<br/>Canada</p>                                                   | <p>Paya Perez, Ana<br/>Soil Chemist in Department of Land Resources<br/>Joint Research Centre<br/>Italy</p>                                |
| <p>Payo-Payo, Ana<br/>Post-doc Ecology<br/>IMEDEA-CSIC-UIB<br/>Spain</p>                                                                                               | <p>Paz, Claudia<br/>Post doctoral researcher in Ecology<br/>Universidade Estadual Paulista, UNESP<br/>Brazil</p>                        | <p>Paz, Sergio<br/>PhD Chemistry<br/>INFIQC / Universidad Nacional de Córdoba.<br/>Argentina</p>                                           |



|                                                                                                                              |                                                                                                                                                                                         |                                                                                                                                               |
|------------------------------------------------------------------------------------------------------------------------------|-----------------------------------------------------------------------------------------------------------------------------------------------------------------------------------------|-----------------------------------------------------------------------------------------------------------------------------------------------|
| Peacock, Julie<br>Lecturer in Ecology<br>University of Leeds<br>United Kingdom of Great Britain and Northern Ireland (the)   | Pearce, Martin<br>PhD Candidate, Molecular and Cellular Biology<br>Oregon State University<br>United States of America (the)                                                            | pearcy, william<br>Professor Emeritus, College of Ocean and Atmospheric Sciences<br>Oregon State University<br>United States of America (the) |
| Pearlson, Oren<br>Lecturer / researcher<br>Tel Hai College<br>Israel                                                         | Pearsall, Sam<br>Retired Large System Ecologist, Biogeographer<br>Science Director, The Nature Conservancy, NC & adjunct professor at UNC Chapel Hill<br>United States of America (the) | Pearson, Amber<br>Michigan State University<br>United States of America (the)                                                                 |
| Pearson, Richard<br>Emeritus Professor<br>James Cook University<br>Australia                                                 | Pearson, Sarah<br>PhD Ecology<br>Australia                                                                                                                                              | Peartom, David<br>Senior Scientist, Reef Biology<br>South African Association for Marine Biological Research<br>South Africa                  |
| Pease, Brent<br>PhD student - Ecology<br>North Carolina State University<br>United States of America (the)                   | Pebsworth, Paula<br>United States of America (the)                                                                                                                                      | Peccoud, Jean<br>Assistant professor<br>Université de Poitiers<br>France                                                                      |
| Pecetti de Oliveira, Katrine<br>Master Student<br>Universidade Federal de Santa Maria<br>Brazil                              | Pecio, Anna *<br>associate professor<br>Jagiellonian University<br>Poland                                                                                                               | Peck, Mika<br>Senior Lecturer in Conservation Biology<br>University of Sussex<br>United Kingdom of Great Britain and Northern Ireland (the)   |
| Pecl, Gretta<br>Associate Professor, Marine Ecology<br>Centre for Marine Socioecology<br>Australia                           | Peco, Begoña<br>Professor of Ecology<br>Autonoma University of Madrid<br>Spain                                                                                                          | Pecquerie, Laure<br>Researcher, Marine ecology<br>Institut de Recherche pour le Développement (IRD)<br>France                                 |
| Pedersen, Aud-Kirsti<br>Executive Officer/Associate professor of nordic linguistics<br>Norwegian Mapping Authority<br>Norway | Pedersen, Christian Lund<br>Student, Civil Engineering<br>Technical University of Denmark<br>Denmark                                                                                    | Pedersen, Gro<br>Postdoc in Earth Sciences<br>University of Iceland<br>Iceland                                                                |
| Pedersen, Rikke<br>Geologist<br>Nordic Volcanological Center, University of Iceland<br>Iceland                               | Pedrassoli, Julio<br>Professor of Remote Sensing And GIS<br>Federal University of Bahia<br>Brazil                                                                                       | Pedraza, Gustavo<br>Immunologist<br>Universidad Nacional Autónoma de México<br>Mexico                                                         |
| Pedrosa, M <sup>a</sup> Arminda<br>Chemistry/Sciences Education<br>University of Coimbra<br>Portugal                         | Peel, Alison<br>Postdoctoral Research Fellow<br>Griffith University<br>Australia                                                                                                        | Peele, Ashley<br>Research Associate and PhD Avian Ecology<br>Virginia Tech<br>United States of America (the)                                  |

\* indicates individual also signed 1992 Scientists' Warning to Humanity

|                                                                                                                                                                |                                                                                                                                                                                                                      |                                                                                                               |
|----------------------------------------------------------------------------------------------------------------------------------------------------------------|----------------------------------------------------------------------------------------------------------------------------------------------------------------------------------------------------------------------|---------------------------------------------------------------------------------------------------------------|
| Peer, Nasreen<br>Postdoctoral Fellow<br>Nelson Mandela University<br>South Africa                                                                              | Pe'er, Guy<br>Conservation biologist<br>German Centre for Integrative Biodiversity Research<br>(iDiv) Halle-Jena-Leipzig, UFZ - Helmholtz Centre for<br>Environmental Research, and University of Leipzig<br>Germany | PEETERS, Karel (Charles)<br>Prof. Law in Tourism<br>KU LEUVEN - Fac. of Science - Geo Dep -Tourism<br>Belgium |
| Peeters, Marc<br>Assistant Belgian National Focal Point to the Convention<br>on Biological Diversity<br>Royal Belgian Institute of Natural Sciences<br>Belgium | Pegado, Elsa<br>Sociology<br>Portugal                                                                                                                                                                                | Pegalajar-Jurado, Antonio<br>PhD candidate in Wind Energy<br>Technical University of Denmark<br>Denmark       |
| Pegels, Anna<br>Deutsches Institut für Entwicklungspolitik / German<br>Development Institute<br>Germany                                                        | Peh, Kelvin S.-H.<br>Lecturer in Conservation Science<br>University of Southampton<br>United Kingdom of Great Britain and Northern Ireland<br>(the)                                                                  | Peichel, Catherine<br>Professor<br>Institute of Ecology and Evolution, University of Bern<br>Switzerland      |
| Peijnenburg, Katja<br>Associate Professor marine biodiversity<br>University of Amsterdam<br>Netherlands (the)                                                  | Peixoto, Ariane Luna<br>Pesquisador Associado<br>Instituto de Pesquisas Jardim Botânico do Rio de Janeiro<br>Brazil                                                                                                  | Peixoto, Paulo Enrique<br>Professor<br>Federal University of Minas Gerais<br>Brazil                           |
| Pejchar, Liba<br>Associate Professor<br>Colorado State University<br>United States of America (the)                                                            | Peláez, Carlos<br>Ecologist<br>Provita<br>Venezuela (Bolivarian Republic of)                                                                                                                                         | PELAEZ ALLER, MARIA LUISA<br>technician LAB<br>CSIC<br>Spain                                                  |
| Pelé, Marie<br>Ethology<br>France                                                                                                                              | Peletier, Reynier<br>Professor Astronomy<br>University of Groningen<br>Netherlands (the)                                                                                                                             | Pelham, Brett<br>Psychology<br>Montgomery College, Germantown, MD<br>United States of America (the)           |
| Pelicice, Fernando<br>Professor and researcher<br>Universidade Federal do Tocantins<br>Brazil                                                                  | Pellegrini, Fernando<br>PhD candidate<br>Scuola Superiore Sant'Anna<br>Italy                                                                                                                                         | Pellegrini, Lorenzo<br>Associate Professor, Ecological Economics<br>Erasmus University<br>Netherlands (the)   |
| Pellegrini, Marco<br>Botany PhD student<br>Universidade de São Paulo<br>Brazil                                                                                 | Pellegrini Caramaschi, Erica<br>Professor - Fish Ecology<br>Universidade Federal do Rio de Janeiro<br>Brazil                                                                                                         | Pelletier, Agnes<br>Instructor (Environmental Biology)<br>University of Winnipeg<br>Canada                    |

|                                                                                                                                                                 |                                                                                                                          |                                                                                                                                                   |
|-----------------------------------------------------------------------------------------------------------------------------------------------------------------|--------------------------------------------------------------------------------------------------------------------------|---------------------------------------------------------------------------------------------------------------------------------------------------|
| Pelletier, Dominique<br>Senior scientist, Marine Biodiversity Conservation<br>French Institute of the Exploitation of the Sea (IFREMER)<br>France               | Pellissier, Vincent<br>Germany                                                                                           | Pellizzaro, Keiko<br>Analista ambiental<br>ICMBio<br>Brazil                                                                                       |
| Pellkofer, Sarah<br>PhD Soil Ecology<br>University of Zurich<br>United States of America (the)                                                                  | PELLUCHON, Corine<br>Professor in Moral and Political Philosophy<br>University of Paris-Est-Marne-La-Vallée<br>France    | Pelser, Pieter<br>Senior Lecturer in Plant Systematics<br>University of Canterbury<br>New Zealand                                                 |
| Pelton, Emma<br>Conservation Biologist<br>The Xerces Society<br>United States of America (the)                                                                  | Peluso, Livia<br>PhD student<br>Instituto de Ciencias Ambientales y Evolutivas,<br>Universidad Austral de Chile<br>Chile | Pelve, Maja<br>Limnology, Agr. Lic.<br>Uppsala University<br>Sweden                                                                               |
| Pena, Adel<br>United States of America (the)                                                                                                                    | Pena, Brian<br>Masters Student<br>California State University Northridge<br>United States of America (the)               | Pena, João Luiz<br>Pesquisador autônomo<br>UFMG<br>Brazil                                                                                         |
| Pena, Rodica<br>Ecology<br>University of Goettingen<br>Germany                                                                                                  | Peña Jimenez, Janelle A.<br>Graduate Student Ecology<br>Universidad de Puerto Rico Recinto Rio Piedras<br>Puerto Rico    | Peñafiel Ricaurte, Diana Alexandra<br>PhD Student<br>Universidad Andrés Bello<br>Ecuador                                                          |
| Peña-Miller, Rafael<br>Assistant Professor in Systems Biology<br>Center for Genomic Sciences, UNAM<br>Mexico                                                    | Peñaranda, Diego<br>Biologist - PhD. (c)<br>Universidad de Chile<br>Bolivia (Plurinational State of)                     | Peñas, Francisco J.<br>Postdoctoral Researcher<br>Universidad Católica de la Santísima Concepción<br>Spain                                        |
| penco, susanna<br>biologist<br>university<br>Italy                                                                                                              | Penet, Laurent<br>Evolutionary Biology<br>INRA<br>Guadeloupe                                                             | Pengelly, David<br>Professor Emeritus, Mathematics<br>New Mexico State University<br>United States of America (the)                               |
| Penitente, Manolo<br>PhD Student<br>UNESP<br>Brazil                                                                                                             | Penkler, David<br>PhD Bioinformatics<br>Rhodes University<br>South Africa                                                | Penkler, Michael<br>Postdoctoral Researcher, Science and Technology Policy<br>Technical University of Munich<br>Germany                           |
| Penn, Dustin<br>Senior Scientist, Behavioral Ecology<br>Department of Integrative Biology and Evolution,<br>University of Veterinary Medicine Vienna<br>Austria | Penner, Johannes<br>Senior Researcher (Ecology & Biodiversity Science)<br>University of Freiburg<br>Germany              | Penney, David<br>Honorary Lecturer / palaeontologist<br>University of Manchester<br>United Kingdom of Great Britain and Northern Ireland<br>(the) |

|                                                                                                                                     |                                                                                                                                            |                                                                                                         |
|-------------------------------------------------------------------------------------------------------------------------------------|--------------------------------------------------------------------------------------------------------------------------------------------|---------------------------------------------------------------------------------------------------------|
| Penneys, Darin<br>Assistant Professor<br>University of North Carolina Wilmington<br>United States of America (the)                  | Penninck, Silvana<br>Doctoral student<br>University of São Paulo<br>Brazil                                                                 | Penning de Vries, Frits<br>agro-ecologist<br>de Vries<br>Netherlands (the)                              |
| Penning de Vries, Marloes<br>Postdoc in Satellite Remote Sensing of the Atmosphere<br>Max Planck Institute for Chemistry<br>Germany | Pennino, Maria Grazia<br>Researchere<br>Instituto Español de Oceanografía<br>Spain                                                         | Penone, Caterina<br>Postdoctoral researcher - ecology<br>University of Bern<br>Switzerland              |
| Penso, Jorge<br>Soil Science<br>Texas Tech University<br>United States of America (the)                                             | Pepin, Pierre<br>Adjunct Professor<br>Memorial University of Newfoundland<br>Canada                                                        | Peprah, Theresa *<br>Senior Research scientist<br>CSIR-Forestry Research Institute of Ghana<br>Ghana    |
| Pequeno, Pedro<br>Biologist<br>Instituto Nacional de Pesquisas da Amazônia<br>Brazil                                                | Peralta-Sánchez, Juan M. *<br>Evolutionary Ecologist<br>Estación Biológica de Doñana (CSIC)<br>Spain                                       | Perdereau, Elfie<br>Postdoc Ecology Biology<br>Institute of Research on Insect Biology (IRBI)<br>France |
| Perea, Juan Ramón<br>PhD Student<br>Spanish Research Council<br>Spain                                                               | Perea Manera, Hector<br>Postdoctoral Research Geologist<br>ICM-CSIC (Spain) and Scripps Institution of Oceanography-<br>UCSD (US)<br>Spain | Peregrym, Mykyta<br>Senior Researcher<br>Taras Shevchenko National University of Kyiv<br>Ukraine        |
| Pereira, Arildo<br>Student of Master<br>University Federal de São Carlos<br>Brazil                                                  | Pereira, Bruno<br>Museu da Lourinhã<br>Portugal                                                                                            | Pereira, Enio<br>Researcher<br>National Institute for Space Research-INPE<br>Brazil                     |
| PEREIRA, FABRICIO<br>PROFESSOR/ENTOMOLOGY<br>FEDERAL UNIVERSITY OF GRANDE DOURADOS<br>Brazil                                        | Pereira, Hasley Rodrigo<br>PhD Estudent<br>PPGCA Universidade de Brasília (UnB)<br>Brazil                                                  | Pereira, Isaias<br>Professor<br>Instituto Federal do Pará - Campus Itaituba<br>Brazil                   |
| Pereira, Lucas Augusto<br>Graduating studant in biological sciences<br>São Paulo State University<br>Brazil                         | Pereira, Messias<br>Titular Professor<br>universidade Estadual do Norte Fluminense<br>Brazil                                               | Pereira, Paulo<br>Professor<br>Mykolas Romeris Univeristy<br>Lithuania                                  |
| Pereira, Pedro<br>Biologist<br>Évora University<br>Portugal                                                                         | Pereira, Ramiro<br>Biologist<br>Universidad de la Republica<br>Uruguay                                                                     | Pereira, Rodrigo<br>Professor (Ecology)<br>University of Sao Paulo<br>Brazil                            |

|                                                                                                                                                  |                                                                                                                                       |                                                                                                                                         |
|--------------------------------------------------------------------------------------------------------------------------------------------------|---------------------------------------------------------------------------------------------------------------------------------------|-----------------------------------------------------------------------------------------------------------------------------------------|
| Pereira de Deus, Cláudia *<br>researcher<br>Instituto Nacional de Pesquisas da Amazônia<br>Brazil                                                | PEREIRA DOS SANTOS, MANUEL<br>FULL PROFESSOR OF PHYSICS<br>UNIVERSITY OF ÉVORA<br>Portugal                                            | Pereira Gabellini, Aurelia<br>MSc student Fisheries<br>DTU<br>Denmark                                                                   |
| Pereira Milagres, Adriana<br>Biologist, PhD student in Applied Ecology<br>Federal University of Lavras<br>Brazil                                 | Pereira-Figueiredo, Inês<br>Kidsfellows<br>Portugal                                                                                   | Perera, Nishanthi<br>Independent Consultant and Visiting Academic<br>Sri Lanka                                                          |
| Perera Leg, Ana<br>Biologist - Auxiliary Researcher<br>CIBIO-InBIO<br>Portugal                                                                   | Peres, Carlos *<br>University Professor<br>University of East Anglia<br>United Kingdom of Great Britain and Northern Ireland<br>(the) | Peres, Mylena<br>Master student<br>Federal University of Paraná<br>Brazil                                                               |
| Peretti, Alfredo V.<br>Associate Professor and Researcher<br>The National University of Cordoba, and CONICET<br>Argentina                        | Pereyra, Ricardo<br>Associate Professor / Evolutionary Biology<br>University of Gothenburg<br>Sweden                                  | Perez, Denise<br>PhD Student, Coral Reef Scientist<br>The University of Queensland<br>Australia                                         |
| Perez, Grégoire<br>Temporary teaching and research assistant<br>University of Franche-Comté<br>France                                            | Perez, Luis<br>Geneticist<br>Instituto de Ciencias Sociales y Humanas<br>Argentina                                                    | Perez, Mervin<br>PhD Candidate in Environmental Science<br>University of Puerto Rico-Rio Piedras<br>Guatemala                           |
| Perez, Timothy<br>PhD Candidate<br>University of Miami<br>United States of America (the)                                                         | Pérez, Liseth<br>Investigador Titular A<br>Instituto de Geología, UNAM<br>Mexico                                                      | Perez Alvarez, Maria Jose *<br>Profesor Contratado Doctor/Neuroscience<br>Universidad Autonoma de Madrid<br>Spain                       |
| Pérez Hidalgo, Nicolás<br>Researcher<br>Spain                                                                                                    | Perez Rocha, Mariana<br>phD candidate<br>University of Oulu<br>Finland                                                                | Perez-Barrales, Rocio *<br>Senior Lecturer<br>University of Portsmouth<br>United Kingdom of Great Britain and Northern Ireland<br>(the) |
| Pérez-Contreras, Tomás<br>Postdoctoral Researcher<br>Universidad de Granada<br>Spain                                                             | Pérez-Fernández, Maria<br>Professor of Ecology<br>University Pablo de Olavide<br>Spain                                                | Pérez-García, Eduardo A.<br>Profesor de Carrera<br>Universidad Nacional Autónoma de México<br>Mexico                                    |
| Perez-Gelabert, Daniel<br>Research Biologist<br>National Museum of Natural History, Smithsonian<br>Institution<br>United States of America (the) | Pérez-Luque, Antonio J.<br>PhD Student<br>Department of Ecology, University of Granada<br>Spain                                       | Pérez-Méndez, Néstor<br>Postdoctoral Researcher<br>CONICET-UNRN<br>Spain                                                                |

|                                                                                                                                                            |                                                                                                                                         |                                                                                                                               |
|------------------------------------------------------------------------------------------------------------------------------------------------------------|-----------------------------------------------------------------------------------------------------------------------------------------|-------------------------------------------------------------------------------------------------------------------------------|
| Perez-Moreno, Jorge L.<br>Biological Sciences<br>Florida International University<br>United States of America (the)                                        | Pérez-Ortega, Sergio<br>Mycologist<br>Real Jardin Botanico (CSIC)<br>Spain                                                              | Pérez-Polo, Sara<br>PhD Student<br>Marine Biological Station of A Graña, University of<br>Santiago de Compostela<br>Spain     |
| Perez-Rovira, Patricia<br>Biologist<br>Vaersa-Generalitat Valenciana<br>Spain                                                                              | Perez-Rueda, Ernesto<br>Professor / Bioinformatics<br>UNAM<br>Mexico                                                                    | Pérez-Salicrup, Diego R.<br>Professor<br>Universidad Nacional Autónoma de México<br>Mexico                                    |
| Perez-Torres, Jairo<br>Associate professor<br>Pontificia Universidad Javeriana<br>Colombia                                                                 | Perez-Wright, Emilie<br>Research Assistant, Centre for Crop and Disease<br>Management<br>Curtin University<br>Australia                 | Pergl, Jan<br>Researcher<br>Institute of Botany, CAS<br>Czech Republic (the)                                                  |
| Perillo, Lucas<br>Biologist. PhD Candidate<br>Universidade Federal de Minas Gerais<br>Brazil                                                               | Perini, Samuel<br>Sweden                                                                                                                | PERIQUET, Georges<br>Emeritus Professor<br>Institut of Insect biology, University F. Rabelais, TOURS<br>France                |
| Perissinotto, Renzo<br>Holder: SARChI Chair in Shallow Water Ecosystems<br>Nelson Mandela University<br>South Africa                                       | Periwal, Vinita<br>Postdoctoral Fellow<br>EMBL, Heidelberg<br>Germany                                                                   | Perkin, Elizabeth<br>River Ecologist<br>United States of America (the)                                                        |
| Pernetta, Angelo<br>Principal Lecturer in Environmental Biology<br>University of Brighton<br>United Kingdom of Great Britain and Northern Ireland<br>(the) | Peroni, Nivaldo<br>Professor/Ecology<br>Federal University of Santa Catarina (UFSC)<br>Brazil                                           | Perret, Cedric<br>PhD student<br>Edinburgh Napier University<br>United Kingdom of Great Britain and Northern Ireland<br>(the) |
| perrier, charles<br>CNRS<br>France                                                                                                                         | Perrier, Quentin<br>Researcher in Energy Economics<br>CIRED<br>France                                                                   | Perrin, Nicolas<br>Professor of Ecology<br>University of Lausanne<br>Switzerland                                              |
| Perrone, Miranda<br>Geography and Geospatial Sciences<br>United States of America (the)                                                                    | Perrot-Minnot, Marie-Jeanne<br>Senior Lecturer<br>Ecology Evolution lab, UMR 6282 CNRS, Universite<br>Bourgogne Franche-Comte<br>France | Perry, Allison<br>Marine conservation scientist<br>Oceana<br>Spain                                                            |

|                                                                                                                                                            |                                                                                                                         |                                                                                                                     |
|------------------------------------------------------------------------------------------------------------------------------------------------------------|-------------------------------------------------------------------------------------------------------------------------|---------------------------------------------------------------------------------------------------------------------|
| Perry, Frances<br>PhD researcher in Marine Ecology<br>Plymouth Marine Laboratory<br>United Kingdom of Great Britain and Northern Ireland (the)             | Perry, Matthew<br>Emeritus Scientist<br>USGS Patuxent Wildlife Research Center<br>United States of America (the)        | Perry, Sarah<br>Earth Science<br>Scripps Institution of Oceanography<br>United States of America (the)              |
| Persson, Anna S.<br>postdoctoral research fellow<br>Center for Environment and Climate Reseach<br>Sweden                                                   | Persson, Jens<br>General practitioner, Medical Doctor<br>Sweden                                                         | Persson, Lo<br>PhD student Swedish University of Agricultural Sciences<br>Sweden                                    |
| Pertoldi, Cino<br>Professor<br>Denmark                                                                                                                     | Pescador, Rosete *<br>Plant physiology<br>Universidade Federal de Santa Catarina<br>Brazil                              | Pesce, Stéphane<br>Researcher, Aquatic Microbial Ecotoxicology<br>Irstea<br>France                                  |
| Pesch, Eva<br>Family Medicine<br>United States of America (the)                                                                                            | Pesch, Gerard<br>Technician<br>Wageningen University & Research<br>Netherlands (the)                                    | Pesic, Vladimir<br>Professor of Ecology and Zoology<br>University of Montenegro<br>Montenegro                       |
| Pešić, Milica<br>Senior Research Fellow at Department of<br>Neurobiology/Cancer Research<br>Institute for Biological Research "Siniša Stanković"<br>Serbia | Pestana, Lueji<br>Lecturer<br>Universidade Agostinho Neto<br>Angola                                                     | Petean, Flavia<br>PhD Student in Systematics and Evolution<br>Universidade Federal do Rio Grande do Norte<br>Brazil |
| Peter, Jakob<br>PhD student, Energy economics<br>Institute of Energy Economics, University of Cologne<br>Germany                                           | Peter, Sonia<br>Head of Departments of Chemistry and Environmental<br>Science<br>Barbados Community College<br>Barbados | Petermann, Holger<br>PhD Candidate Geology and Geophysics<br>Yale University<br>United States of America (the)      |
| Petermann, Jana<br>Assoc. Prof. of Ecology<br>University of Salzburg<br>Austria                                                                            | Peters, Anne<br>Associate professor<br>Monash University<br>Australia                                                   | Peters, Charles<br>Ecology<br>The New York Botanical Garden<br>United States of America (the)                       |
| Peters, Howard<br>Marine Ecology<br>University of York<br>United Kingdom of Great Britain and Northern Ireland (the)                                       | Peters, Katie<br>PhD student<br>University of Chester<br>United Kingdom of Great Britain and Northern Ireland (the)     | Petersen, Malte<br>Biology<br>University of Bonn<br>Germany                                                         |
| Petersen, Sebastian<br>PhD student (Environmental Economics)<br>Technical University of Denmark<br>Denmark                                                 | Peterson, Elizabeth<br>Senior lecturer<br>University of Auckland<br>New Zealand                                         | Peterson, John<br>Archaeologist<br>University of guam<br>United States of America (the)                             |

|                                                                                                                                                                                                                                            |                                                                                                                                 |                                                                                                                                     |
|--------------------------------------------------------------------------------------------------------------------------------------------------------------------------------------------------------------------------------------------|---------------------------------------------------------------------------------------------------------------------------------|-------------------------------------------------------------------------------------------------------------------------------------|
| Peterson, Mark<br>Professor Emeritus<br>Universoty of Southern Mississippi<br>United States of America (the)                                                                                                                               | Peterson, Rolf<br>Research Professor of Wildlife Ecology<br>Michigan Technological University<br>United States of America (the) | Pétillon, Julien<br>Associate Professor in Ecology and Organisms Biology<br>University of Rennes 1<br>France                        |
| PETINI-BENELLI, ADARILDA<br>PhD in Botany<br>Federal University of Mato Grosso State<br>Brazil                                                                                                                                             | Petit, Selene<br>PhD Student, Cognitive Science<br>Macquarie University<br>Australia                                            | Petit, Sophie<br>Associate Professor of Wildlife Ecology<br>University of South Australia<br>Australia                              |
| Petitta, Marco<br>Associate Professor on Hydrogeology<br>Earth Science Department, Sapienza University of Rome<br>Italy                                                                                                                    | Petkov, Nikolai<br>bird ecology and conservation<br>Bulgarian Society for the Protection of Birds<br>Bulgaria                   | Petracca, Lisanne<br>Geospatial Analyst<br>Panthera<br>United States of America (the)                                               |
| Petreaca, Melissa<br>Assistant Professor of Biology<br>DePauw University<br>United States of America (the)                                                                                                                                 | PETRETTO, Marie<br>Conservation Biologist<br>Marwell Wildlife<br>Tunisia                                                        | Petrokofsky, Gillian<br>Research scientist<br>University of Oxford<br>United Kingdom of Great Britain and Northern Ireland<br>(the) |
| Petroni, Liége Mariel<br>Teacher<br>Universidade Federal de São Paulo<br>Brazil                                                                                                                                                            | Petrônio, Maicon<br>Pós-doc<br>Unesp<br>Brazil                                                                                  | Petrou, Katherina<br>Lecturer / Marine Biology<br>University of Technology Sydney<br>Australia                                      |
| Petrucio, Mauricio<br>Senior teacher Department of Ecology and Zoology<br>Federal University of Santa Catarina - UFSC<br>Brazil                                                                                                            | Petry, Ana<br>Associate Professor<br>Rio de Janeiro Federal University<br>Brazil                                                | Petry, William<br>Postdoctoral researcher, Ecology<br>ETH Zurich<br>Switzerland                                                     |
| Pett, Tristan<br>PhD Researcher, Biodiversity Management<br>Durrell Institute of Conservation and Ecology, School of<br>Anthropology and Conservation, University of Kent<br>United Kingdom of Great Britain and Northern Ireland<br>(the) | Pettenella, Davide<br>Professor<br>University of Padova<br>Italy                                                                | Pettersen, Helge<br>Medical Physics<br>University of Bergen<br>Norway                                                               |
| Pettit, Tom<br>Research Scientist<br>UTS<br>Australia                                                                                                                                                                                      | Pett-Ridge, Jennifer<br>Soil microbiology<br>Lawrence Livermore National Lab<br>United States of America (the)                  | Petty, Ross<br>Professor Emeritus, Pediatrics<br>University of British Columbia<br>Canada                                           |



|                                                                                                             |                                                                                                         |                                                                                                                       |
|-------------------------------------------------------------------------------------------------------------|---------------------------------------------------------------------------------------------------------|-----------------------------------------------------------------------------------------------------------------------|
| Petzer, Edward *                                                                                            | Peula, Francisco *                                                                                      | Pezaro, Nadav                                                                                                         |
| Medical doctor - cardiologist<br>Kings London<br>United Kingdom of Great Britain and Northern Ireland (the) | President<br>NGO Rethinking, waste observatory<br>Spain                                                 | Evolutionary Ecology and Physiology<br>Institute of Evolution, University of Haifa<br>Israel                          |
| Pfannerstill, Eva                                                                                           | Pfannerstill, Vera                                                                                      | Pfeffer, Peter                                                                                                        |
| PhD candidate in Atmospheric Chemistry<br>Max Planck Institute for Chemistry<br>Germany                     | M. Sc. Ecology<br>University of Montpellier<br>Germany                                                  | Senior Lecturer<br>Victoria University of Wellington<br>New Zealand                                                   |
| Pfeiffer, Britta                                                                                            | Pfeiffer, Jeanine                                                                                       | Pfeiffer, Mirjam                                                                                                      |
| Research Communication Assistant<br>Germany                                                                 | Ethnoecologist<br>San José State University<br>United States of America (the)                           | Postdoctoral Scientist<br>Senckenberg Biodiversity and Climate Research Center,<br>60325 Frankfurt am Main<br>Germany |
| Pfeiler, Jr., Edward                                                                                        | Pfennigwerth, Alix                                                                                      | Pfister, Sonja C.                                                                                                     |
| Senior Research Scientist<br>Centro de Investigación en Alimentación y Desarrollo (CIAD), A.C.<br>Mexico    | Research Associate<br>University of Colorado<br>United States of America (the)                          | Germany                                                                                                               |
| Pg Zaman, Dk Nur Amal Nazira                                                                                | Phaka, Fortunate                                                                                        | Phalan, Ben                                                                                                           |
| Universiti Brunei Darussalam<br>Brunei Darussalam                                                           | Environmental Science<br>North-West University<br>South Africa                                          | Research Associate<br>Oregon State University<br>United States of America (the)                                       |
| Phelps, Tyler                                                                                               | Pheng, Sokline                                                                                          | Phephu, Nonkululo                                                                                                     |
| Marine Scientist<br>University of Hawaii at Hilo<br>United States of America (the)                          | Student<br>TUAT<br>Japan                                                                                | Lecturer/Bryologist<br>Tshwane University of Technology<br>South Africa                                               |
| Philip, Justine                                                                                             | Philipp, David                                                                                          | Philippe, Allan                                                                                                       |
| PhD Ecosystem Management<br>University of New England<br>Australia                                          | Chairman<br>Fisheries Conservation Foundation<br>United States of America (the)                         | Environmental chemistry<br>University of Koblenz-Landau<br>Germany                                                    |
| Philippsen, Peter                                                                                           | Phillimore, Albert                                                                                      | Phillip, Dawn A T                                                                                                     |
| Professor emeritus<br>University of Basel<br>Switzerland                                                    | Biologist<br>University of Edinburgh<br>United Kingdom of Great Britain and Northern Ireland (the)      | Lecturer<br>The University of the West Indies<br>Trinidad and Tobago                                                  |
| Phillips, Diana                                                                                             | Phillips, John G.                                                                                       | Phillips, Karyce                                                                                                      |
| Professor of Chemistry<br>Kettering University<br>United States of America (the)                            | Postdoctoral Fellow, Integrative Biology<br>Michigan State University<br>United States of America (the) | Forest Management<br>Trinidad and Tobago                                                                              |

|                                                                                                                                          |                                                                                                                                      |                                                                                                                                                                                                    |
|------------------------------------------------------------------------------------------------------------------------------------------|--------------------------------------------------------------------------------------------------------------------------------------|----------------------------------------------------------------------------------------------------------------------------------------------------------------------------------------------------|
| Phillips, Michelle<br>Instructor, Biology<br>Hawaii Community College<br>United States of America (the)                                  | Phillips, Nicole<br>Senior Lecturer, Marine Ecology<br>Victoria Universtiy of Wellington<br>New Zealand                              | Phillips, Oliver<br>Professor of Tropical Ecology<br>University of Leeds<br>United Kingdom of Great Britain and Northern Ireland (the)                                                             |
| Phinn, Stuart<br>Professor of Geography<br>The University of Queensland<br>Australia                                                     | Photopoulou, Theoni<br>Postdoctoral research fellow<br>Nelson Mandela University<br>South Africa                                     | Piacentini, Vitor de Q.<br>Biologist<br>PPGZOO, Inst. de Biociências, Universidade Federal do Mato Grosso<br>Brazil                                                                                |
| Piasecki, Fabien<br>Information and Communication Science<br>Sciences Citoyennes (NGO, Paris)<br>France                                  | Piatek, Jennifer<br>Associate Professor, Planetary Geology<br>Central Connecticut State University<br>United States of America (the) | Pica Granados, Yolanda<br>Researcher in Ecotoxicology<br>Instituto Mexicano de Tecnología del Agua<br>Mexico                                                                                       |
| Picard, Marion<br>Postdoctoral researcher in Biology<br>IST Austria<br>Austria                                                           | Piccardo, Paolo<br>Professor in Metallurgy<br>Università degli Studi di Genova<br>Italy                                              | Picchi, Gianni<br>Researcher - Forest engineering<br>CNR-IVALSA<br>Italy                                                                                                                           |
| Picchi, Malayka Samantha<br>Agrobioscience<br>Scuola Superiore Sant'Anna<br>Italy                                                        | PICCININI, CESAR<br>Professor<br>Universidade Federal do Rio Grande do Sul<br>Brazil                                                 | Pichegru, Lorien<br>Marine biologist<br>Institute for Coastal and Marine Research<br>South Africa                                                                                                  |
| Pichon, Florence<br>Research Officer<br>The Overseas Development Institute<br>United Kingdom of Great Britain and Northern Ireland (the) | Pichot, Christian<br>Forest Ecology Researcher<br>INRA<br>France                                                                     | Pickard, Barbara<br>Prof Emerita and NSF faculty fellow of Center for Engineering Mechanobiology<br>washington university in st louis<br>United States of America (the)                            |
| Pickard, John<br>Despartment of Environmental Sciences<br>Macquarie University<br>Australia                                              | Pickering, Jeffrey<br>Faculty Specialist<br>United States of America (the)                                                           | Pickering, Kim<br>Professor<br>University of Waikato<br>New Zealand                                                                                                                                |
| Pickett, Erin<br>Field Biologist<br>University of Hawaii<br>United States of America (the)                                               | Piechaud, Nils<br>PhD student - Marine Ecology<br>Plymouth University<br>United Kingdom of Great Britain and Northern Ireland (the)  | Piedade, Maria Teresa Fernandez<br>Senior Researcher/Wetlands Ecology<br>National Institute for Amazonian Research - INPA;<br>Ecology, monitoring and sustainable use of wetlands - MAUA<br>Brazil |
| Pienaar, Daniel<br>Head: Scientific Services<br>South African National Parks<br>South Africa                                             | Pier, Jaleigh<br>Graduate Student in paleontology<br>University of Connecticut<br>United States of America (the)                     | Piera, Jaume<br>Tenured Scientist<br>Institute of Marine Sciences<br>Spain                                                                                                                         |

|                                                                                                                                                                           |                                                                                                                                                             |                                                                                                                                                          |
|---------------------------------------------------------------------------------------------------------------------------------------------------------------------------|-------------------------------------------------------------------------------------------------------------------------------------------------------------|----------------------------------------------------------------------------------------------------------------------------------------------------------|
| Pierce, Joshua<br>Herpetologist<br>North Dakota State University<br>United States of America (the)                                                                        | Pierce, Simon<br>Principal Scientist<br>Marine Megafauna Foundation<br>New Zealand                                                                          | Pierce Colfer, Carol Jean<br>Anthropologist<br>Cornell University<br>United States of America (the)                                                      |
| Pierotti, Michele<br>evolutionary ecologist<br>Smithsonian Tropical Research Institute<br>Panama                                                                          | Pierre, JOUVENTIN *<br>Retired Directeur de recherche<br>CNRS<br>France                                                                                     | Pierre-Olivier, Maquart<br>PhD Student<br>Institute of Aquaculture, University of Stirling<br>United Kingdom of Great Britain and Northern Ireland (the) |
| Piers, Warren<br>Professor of Chemistry<br>University of Calgary<br>Canada                                                                                                | Piersma, Theunis<br>Chair in Global Flyway Ecology<br>University of Groningen and NIOZ Royal Netherlands<br>Institute for Sea Research<br>Netherlands (the) | Pierson, Don<br>Research Scientist Limnology<br>Uppsala University<br>Sweden                                                                             |
| Pierson, Todd<br>PhD Candidate<br>University of Tennessee Knoxville<br>United States of America (the)                                                                     | Pieterse, Annika<br>PhD Nematology student<br>Stellenbosch University<br>South Africa                                                                       | Pieterse, Zelda<br>Plant pathology<br>University of Pretoria<br>South Africa                                                                             |
| Pietroluongo, Guido<br>Marine mammal Vet Scientist<br>Archipelagos Institute of Marine Coservation<br>Greece                                                              | Pietrzak, Barbara<br>Assistant Professor, Ecology<br>University of Warsaw<br>Poland                                                                         | Piikkila, Erik<br>Forest & Watershed Ecologist<br>GreenBlue, Yellowpoint Ecological Society (YES), &<br>Wildwood Ecoforest<br>Canada                     |
| Piirainen, Sirke<br>PhD student<br>University of Helsinki<br>Finland                                                                                                      | Pike, Kyana<br>Zoology<br>James Cook University<br>Australia                                                                                                | Pilati, Ronaldo<br>Social Psychology<br>University of Brasilia<br>Brazil                                                                                 |
| Pilditch, Conrad<br>Professor, marine science<br>University of Waikato<br>New Zealand                                                                                     | Pilkaityte, Renata<br>senior scientist / ecology<br>Klaipeda University<br>Lithuania                                                                        | Pilkington, Fred<br>Conservation Science Masters Student<br>Imperial College London<br>United Kingdom of Great Britain and Northern Ireland (the)        |
| Pillay, Kerushka<br>PhD candidate - Life Sciences<br>Univrsty of KwaZulu-Natal<br>South Africa                                                                            | Pillay, Sumeshni<br>South Africa                                                                                                                            | Pilon, Alan<br>Posdoc<br>USP<br>Brazil                                                                                                                   |
| Pilon, André Francisco<br>Associate Professor (Senior), Environmental Studies<br>University of São Paulo; International Academy of<br>Science, Health & Ecology<br>Brazil | PILOTE, KIYANI<br>Ms in Forest Resources and Ecological Restoration<br>Yeungnam University<br>Rwanda                                                        | Pilotto, Francesca<br>Postdoctoral researcher<br>Senckenberg Research Institute and Natural History<br>Museum Frankfurt<br>Germany                       |

\* indicates individual also signed 1992 Scientists' Warning to Humanity

|                                                                                                                                                   |                                                                                                                                                                       |                                                                                                                                                               |
|---------------------------------------------------------------------------------------------------------------------------------------------------|-----------------------------------------------------------------------------------------------------------------------------------------------------------------------|---------------------------------------------------------------------------------------------------------------------------------------------------------------|
| Piludu, Nick<br>Conservation Manager<br>Blue Ventures<br>Timor-Leste                                                                              | PIMENTA, DANIEL<br>National Institute of Amazonian Research<br>National Institute of Amazonian Research<br>Brazil                                                     | Pimenta, Natalia<br>Ms. Sci. in Ecology<br>National Institute of Amazonian Research<br>Brazil                                                                 |
| Pimentel, Caio<br>Phd student<br>Federal University of Espirito Santo<br>Brazil                                                                   | Pimentel, Carlos<br>Professor of Psychological Assessment<br>Federal University of Paraíba<br>Brazil                                                                  | Pinaud, David<br>Research Ingeneer<br>CEBC - CNRS/ULR<br>France                                                                                               |
| PINAUD, Silvain<br>PhD Candidate<br>IHPE - UPVD - CNRS - UM - OMS<br>France                                                                       | Pincebourde, Sylvain *<br>CNRS researcher<br>Insect Biology Research Institute, CNRS, University of<br>Tours<br>France                                                | Pincheira-Donoso, Daniel<br>Senior Lecturer in Evolutionary Biology<br>University of Lincoln<br>United Kingdom of Great Britain and Northern Ireland<br>(the) |
| Pine, Ronald<br>Adjunct Research Associate, Biodiversity Institute:<br>taxonomy/ecology<br>University of Kansas<br>United States of America (the) | Pineda, Francisco D.<br>Professor of Ecology<br>Universidad Complutense, Madrid<br>Spain                                                                              | Pineda, Mari-Carmen<br>Postdoctoral Researcher / Marine Biology<br>Australian Institute of Marine Science<br>Australia                                        |
| Pineda Guerrero, Alicia Alexandra<br>Researcher in Biodiversity and Ecosystem Services<br>Bogotá Botanical Garden<br>Colombia                     | Piñeiro, Ana<br>Ethology<br>Universidad Andrés Bello<br>Chile                                                                                                         | Pinela, Ana<br>Researcher in Biodiversity<br>University of Barcelona<br>Spain                                                                                 |
| Pinero, Manuel<br>PhD Student in Science (Biochemistry)<br>Universidade Federal do Paraná<br>Brazil                                               | Piñero, Daniel<br>Professor, Population Genetics<br>Instituto de Ecología, Universidad nacional Autonoma de<br>Mexico<br>Mexico                                       | Piñero, Tamara Alejandra<br>PhD Investigador Biología Molecular y genómica<br>Hospital Italiano de Buenos Aires<br>Argentina                                  |
| pinheiro, catarina<br>Post Doc Researcher<br>University of Coimbra<br>Portugal                                                                    | Pinheiro, Elizia Aparecida *<br>Bióloga<br>Escola Família Agrícola de Porto Nacional - TO<br>Brazil                                                                   | Pinheiro, Hudson<br>Researcher<br>California Academy of Sciences<br>United States of America (the)                                                            |
| Pinheiro Dutra Rulli, Mayra<br>Master Student - Ecology and Conservation<br>Uppsala University<br>Sweden                                          | Pinheiro Silva, Lorena<br>PhD student / Ecology<br>Federal University of Santa Catarina<br>Brazil                                                                     | Pinho, Catarina<br>Researcher, Biological Sciences<br>CIBIO-InBIO, U Porto, Portugal<br>Portugal                                                              |
| Pinilla-Buitrago, Gonzalo<br>PhD Student<br>City University of New York<br>Colombia                                                               | Pinker, Annabel<br>Leverhulme Early Career Fellow, Social Anthropology<br>The James Hutton Institute<br>United Kingdom of Great Britain and Northern Ireland<br>(the) | Pinna, Pedro<br>Biologist<br>Museu Nacional, Universidade Federal do Rio de Janeiro<br>Brazil                                                                 |

|                                                                                                                                                                            |                                                                                                            |                                                                                                                       |
|----------------------------------------------------------------------------------------------------------------------------------------------------------------------------|------------------------------------------------------------------------------------------------------------|-----------------------------------------------------------------------------------------------------------------------|
| Piñon, Victor<br>Master Student<br>UNAM<br>Mexico                                                                                                                          | Pinsard, Françoise<br>Computer scientist<br>CNRS<br>France                                                 | Pinson, Jerald<br>PhD candidate in Biology<br>University of Florida<br>United States of America (the)                 |
| Pintado-Patiño, Jose Carlos<br>Posdoctoral Researcher<br>Center for Research and Advanced Studies of the<br>National Polytechnic Institute. Merida city, Yucatan<br>Mexico | Pintar, Matthew<br>PhD candidate in biology<br>University of Mississippi<br>United States of America (the) | Pintea, Lilian<br>Vice President Conservation Science<br>the Jane Goodall Institute<br>United States of America (the) |
| Pinto, António<br>Energy Efficiency<br>GOPLANET ENERGIA<br>Brazil                                                                                                          | Pinto, Ernani<br>Associate Professor / Toxicology<br>Universidade de São Paulo<br>Brazil                   | Pinto, José<br>Researcher<br>INPA<br>Brazil                                                                           |
| Pinto, Meri Emili<br>Organic Chemistry<br>UNESP<br>Brazil                                                                                                                  | Pinto, Míriam Plaza<br>Professor<br>Universidade Federal do Rio Grande do Norte<br>Brazil                  | Pinto de Oliveira, J. C.<br>Department of Philosophy - IFCH<br>UNICAMP<br>Brazil                                      |
| Pinto Henriques, Luiza Magalli<br>Science and Technology Analyst<br>INPA<br>Brazil                                                                                         | Pinto-Correia, Teresa<br>Geographer, Associate Professor<br>University of Evora<br>Portugal                | Pintor, Anna<br>Postdoctoral research fellow, biology<br>James Cook University<br>Australia                           |
| Pinzon, Jaime<br>Research Scientist<br>Natural Resources Canada<br>Canada                                                                                                  | Piou, Cyril<br>Researcher<br>CIRAD<br>France                                                               | Piovano, Susanna<br>Senior Lecturer in Marine Biology<br>The University of the South Pacific<br>Fiji                  |
| Pioz, Maryline<br>Researcher in Epidemiology<br>French National Institute for Agricultural Research INRA<br>France                                                         | Pipping, Theodor<br>Master of Science<br>Karolinska Institutet / Stockholm University<br>Sweden            | Piquer, José<br>Assistant Professor, Earth Sciences<br>Universidad Austral de Chile<br>Chile                          |
| Pirani, José Rubens<br>Full Professor/Botany<br>University of São Paulo<br>Brazil                                                                                          | Piratelli, Augusto<br>Professor<br>Federal University of Sao Carlos<br>Brazil                              | Pires, José Salatiel *<br>Landscape Ecology<br>Universidade Federal de Santa Catarina<br>Brazil                       |
| Pires, Manoel<br>Physics<br>Federal University of Jequitinhonha and Mucuri Valleys<br>(UFVJM)<br>Brazil                                                                    | Pires Costa, Leonora<br>Associate Professor<br>Federal University of Espírito Santo<br>Brazil              | Pires do Prado, Lúvia<br>PHD student<br>Museu Paraense Emílio Goeldi<br>Brazil                                        |

|                                                                                                                                                         |                                                                                                             |                                                                                                                                        |
|---------------------------------------------------------------------------------------------------------------------------------------------------------|-------------------------------------------------------------------------------------------------------------|----------------------------------------------------------------------------------------------------------------------------------------|
| Pires Miranda, Thaís<br>postdoc<br>University of São Paulo<br>Brazil                                                                                    | Pirhofer Walzl, Karin<br>Post Doctoral Researcher in Agroecology<br>Institute of Biology<br>Germany         | Piriz, Gabriela<br>Environmental biology<br>Universidad de Chile<br>Chile                                                              |
| Piscova, Veronika<br>Researcher<br>Institute of Landscape ecology SAS<br>Slovakia                                                                       | Piskozub, Jacek<br>Professor<br>Institute of Oceanology, Polish Academy of Sciences<br>Poland               | Pistorius, Pierre<br>Biologist<br>Nelson Mandela University<br>South Africa                                                            |
| Pita, Miguel<br>Senior Lecturer and Researcher in Genetics<br>Universidad Autónoma de Madrid (UAM)<br>Spain                                             | Pither, Jason<br>Associate Professor, Ecology<br>University of British Columbia, Okanagan<br>Canada         | Pitkänen, Esa<br>Postdoctoral Fellow (Bioinformatics)<br>European Molecular Biology Laboratory (EMBL)<br>Germany                       |
| Pitkin, Joe<br>Environmental Science and English<br>Clark College<br>United States of America (the)                                                     | Pitman, Nigel<br>Mellon Senior Conservation Ecologist<br>The Field Museum<br>United States of America (the) | Piton, Guillaume<br>Postdoctoral fellow<br>IRSTEA<br>France                                                                            |
| Pitta, Eva<br>Postdoctoral researcher, Ecology<br>University of Cyprus, Department of Biological Sciences<br>Cyprus                                     | Pittet, André<br>France                                                                                     | Pittie, Aasheesh<br>Editor, Indian BIRDS<br>New Ornis Foundation<br>India                                                              |
| Pittman, Simon<br>Research scientist in Seascape Ecology<br>Plymouth University & NOAA<br>United Kingdom of Great Britain and Northern Ireland<br>(the) | Pitts, Neville<br>Senior lecturer, Physiology<br>University of the Witwatersrand<br>South Africa            | Piuz, André<br>Researcher - Geology / Paleontology<br>Natural History Museum Geneva<br>Switzerland                                     |
| Pivatto Serra, Márcia Milena<br>Professora<br>Mackenzie<br>Brazil                                                                                       | Pizarro, Cristobal<br>Professor<br>Universidad de Concepción<br>Chile                                       | Pizo, Marco Aurélio<br>Professor<br>Universidade Estadual Paulista<br>Brazil                                                           |
| Planchon, Frederic<br>Lecturer/researcher<br>Marine Environmental Science Laboratory (LEMAR)<br>France                                                  | Platell, Ghislaine<br>Microbiology PhD candidate<br>The University of Western Australia<br>Australia        | Platenberg, Renata<br>Wildlife Conservation & Natural Resource Management<br>University of the Virgin Islands<br>Virgin Islands (U.S.) |
| Platt, Steven George<br>Associate Conservation Scientist<br>Wildlife Conservation Society<br>United States of America (the)                             | Platto, Sara<br>Senior Lecturer Animal Behavior and Welfare<br>Huazhong Agricultural University<br>China    | Platt-Torres, Alejandra<br>Photographer<br>Freelance<br>Mexico                                                                         |

|                                                                                                                                          |                                                                                                                                                                |                                                                                                                                          |
|------------------------------------------------------------------------------------------------------------------------------------------|----------------------------------------------------------------------------------------------------------------------------------------------------------------|------------------------------------------------------------------------------------------------------------------------------------------|
| Plazas Jiménez, Daniel<br>M.Sc. / Ecology<br>Universidade Federal de Goiás<br>Brazil                                                     | pleguezuelos, juan m<br>professor on zoology<br>granada university<br>Spain                                                                                    | Pleijel, Håkan<br>Professor, Environmental Science<br>University of Gothenburg, Biological and Environmental<br>Sciences<br>Sweden       |
| Plein, Michaela<br>Postdoctoral Fellow in Ecology and Conservation<br>University of Queensland<br>Australia                              | Plencner, Martin<br>Postdoc<br>Institute of Physiology, The Czech Akademy of Sciences<br>Czech Republic (the)                                                  | Plenty, James<br>Computer Science<br>Anglia Ruskin University Cambridge<br>United Kingdom of Great Britain and Northern Ireland<br>(the) |
| Plevin, Richard<br>Research Scientist, Transportation Sustainability Research<br>Center<br>UC Berkeley<br>United States of America (the) | Plissart, Gaëlle<br>Assistant Professor<br>Universidad Austral de Chile<br>Chile                                                                               | Plochocka, Danuta<br>structural biology<br>Institute of Biochemistry and Biophysics PAS<br>Poland                                        |
| Plougonven, Riwal<br>Professor, Atmospheric and Oceanic Dynamics<br>Ecole Polytechnique<br>France                                        | Plowman, Amy<br>Director of Conservation and Education<br>Whitley Wildlife Conservation Trust<br>United Kingdom of Great Britain and Northern Ireland<br>(the) | Plumecocq, Gael<br>Reserch Fellow, Economics<br>INRA<br>France                                                                           |
| Plumptre, Andrew<br>Senior Scientist<br>Wildlife Conservation Society<br>United Kingdom of Great Britain and Northern Ireland<br>(the)   | Poch, Tomás J.<br>Environmental Biologist<br>Universidad de Chile<br>Chile                                                                                     | Pocock, Paul<br>Retired<br>United Kingdom of Great Britain and Northern Ireland<br>(the)                                                 |
| Podkaminer, Kara<br>United States of America (the)                                                                                       | Poertner, Hans<br>Professor<br>Alfred-Wegener-Institute<br>Germany                                                                                             | Poesch, Mark<br>Assistant Professor<br>University of Alberta<br>Canada                                                                   |
| Pogenberg, Vivian<br>Research scientist<br>European Molecular Biology Laboratory (EMBL)<br>Germany                                       | Poggemann, David-Willem<br>Geologist<br>Germany                                                                                                                | Pogoutse, Anastassia<br>PhD student, Biochemistry<br>University of Toronto<br>Canada                                                     |
| Pogoutse, Oxana<br>Lab Manager, molecular biology lab<br>University of Toronto<br>Canada                                                 | Pohlman, Catherine<br>Lecturer, Rainforest Plant Ecology and Natural Resource<br>Management<br>The School for Field Studies<br>Australia                       | Pohlmann, Kirsten<br>scientist Limnology<br>Leibniz institute for freshwater ecology and inland<br>fisheries<br>Germany                  |

|                                                                                                                                                 |                                                                                                                                 |                                                                                                                                                      |
|-------------------------------------------------------------------------------------------------------------------------------------------------|---------------------------------------------------------------------------------------------------------------------------------|------------------------------------------------------------------------------------------------------------------------------------------------------|
| Poindexter, Jeremy<br>PhD student, Materials Science and Engineering<br>Massachusetts Institute of Technology<br>United States of America (the) | Poindexter, Magen<br>United States of America (the)                                                                             | Poirié, Marylène<br>Full professor<br>Université Côte d'Azur<br>France                                                                               |
| Poirier, Laurence<br>lecturer<br>Nantes University<br>France                                                                                    | Poirier, Vincent<br>Professor, Soil science and carbon sequestration<br>Université du Québec en Abitibi-Témiscamingue<br>Canada | Poisson, Yoanna<br>Biologist<br>University of Sherbrooke<br>Canada                                                                                   |
| Pola, Marta<br>Biologist<br>Universidad Autónoma de Madrid<br>Spain                                                                             | Pold, Grace<br>University of Massachusetts<br>United States of America (the)                                                    | Polfus, Jean<br>Postdoctoral Fellow<br>Trent University<br>Canada                                                                                    |
| Polgar, Gianluca<br>Evolutionary ecologist<br>Italy                                                                                             | Polinski, Jennifer<br>Genomics Research Technician<br>Marine Biological Laboratory<br>United States of America (the)            | Polito, Paulo Simionatto<br>Prof. Dr., Physical Oceanography<br>University of São Paulo, Oceanographic Institute<br>Brazil                           |
| Polito, Vince<br>Postdoctoral Fellow<br>ARC Centre of Excellence in Cognition and its Disorders<br>Australia                                    | Pollard, Adrian Drew<br>Conservation Manager<br>South Africa                                                                    | Pollard, Alex<br>Senior Ecologist<br>Wildwood Ecology<br>United Kingdom of Great Britain and Northern Ireland<br>(the)                               |
| Pollard, Christopher<br>Lecturer Marine Studies<br>University of Plymouth<br>United Kingdom of Great Britain and Northern Ireland<br>(the)      | Pollard, David<br>Research Professor<br>Pennsylvania State University<br>United States of America (the)                         | Pollard, David<br>Research Associate<br>Department of Ichthyology, Australian Museum, 1<br>William Street, Sydney, New South Wales 2010<br>Australia |
| Pollard, Georgia<br>PhD Researcher - Environmental Science<br>University of South Australia<br>Australia                                        | Pollock, James<br>United States of America (the)                                                                                | Pollom, Riley<br>Conservation Biologist<br>Earth to Oceans Research Group, Simon Fraser University<br>Canada                                         |
| Pols, Auke<br>Postdoctoral researcher, philosophy<br>Eindhoven University of Technology<br>Netherlands (the)                                    | Polyakova, Anna<br>EMBL Hamburg<br>Germany                                                                                      | Polyzoidis, Angelos<br>Fraunhofer ICT<br>Germany                                                                                                     |
| Pombal, Jr, José<br>Departamento de Vertebrados<br>Museu Nacional, Universidade Federal do Rio de Janeiro<br>Brazil                             | Pomeranz, Emily<br>United States of America (the)                                                                               | Pomeranz, Justin<br>PhD candidate in freshwater ecology<br>University of Canterbury<br>New Zealand                                                   |



|                                                                                                                                                                                                                       |                                                                                                                                   |                                                                                                             |
|-----------------------------------------------------------------------------------------------------------------------------------------------------------------------------------------------------------------------|-----------------------------------------------------------------------------------------------------------------------------------|-------------------------------------------------------------------------------------------------------------|
| Pommerening, Florian<br>Postdoctoral researcher - Artificial Intelligence<br>University of Basel<br>Switzerland                                                                                                       | Pompeia, Sabine<br>Lecturer<br>UNIFESP<br>Brazil                                                                                  | Pompili, Marco<br>Collège de France<br>France                                                               |
| Ponce Vélez, Guadalupe<br>Professor and Academic Technician. Marine Pollution by<br>Persistent Organic Pollutants<br>Instituto de Ciencias del Mar y Limnología, Universidad<br>Nacional Autónoma de México<br>Mexico | Ponce-Salvatierra, Almudena<br>Postdoc<br>EMBL<br>France                                                                          | Ponder, Winston<br>Senior Research Fellow<br>Australian Museum<br>Australia                                 |
| Pons, Jean-Marc<br>Associate Professor<br>Museum national d'Histoire naturelle, Paris<br>France                                                                                                                       | Pons, Pere<br>Associate Professor<br>University of Girona<br>Spain                                                                | Pontes, Heloisa<br>Full professor<br>Unicamp<br>Brazil                                                      |
| Pontiga, Francisco<br>Associate Professor<br>Dpt. of Applied Physics, University of Seville<br>Spain                                                                                                                  | Ponton, Dominique<br>Senior Research Officer<br>IRD (French National Research Institute for Sustainable<br>Development)<br>France | Ponton, Stéphane<br>Scientist, Forest Ecology<br>INRA<br>France                                             |
| Pool, Monique<br>Director, Environmental Activist<br>Green Heritage Fund Suriname<br>Suriname                                                                                                                         | Poole, Simon<br>Physician<br>NHS UK<br>United Kingdom of Great Britain and Northern Ireland<br>(the)                              | Poole, Vicky<br>Zoo Herepetology Curator<br>United States of America (the)                                  |
| Pope, Harley<br>Teaching Fellow, Food and Agricultural Systems<br>University of Reading<br>United Kingdom of Great Britain and Northern Ireland<br>(the)                                                              | Pope, Jonathan<br>Manager<br>Department Of Transport<br>United Kingdom of Great Britain and Northern Ireland<br>(the)             | Pope, Lisa<br>Honorary Research Fellow<br>The University of Queensland<br>Australia                         |
| Popescu, Viorel<br>Assistant Professor of Conservation Biology<br>Ohio University<br>United States of America (the)                                                                                                   | Popoola, Michael Olaoluwa *<br>Lecturing<br>Obafemi Awolowo University<br>Nigeria                                                 | Popov, Todor<br>Professor<br>Clinical Centre of Allergology, Medical University Sofia,<br>Sofia<br>Bulgaria |
| Popp, Andrea<br>PhD student<br>Switzerland                                                                                                                                                                            | Poprawa, Izabela<br>Assistant Professor / biology<br>University of Silesia in Katowice<br>Poland                                  | Porazinska, Dorota<br>Research Scientist<br>University of Colorado<br>United States of America (the)        |

|                                                                                                                                             |                                                                                                                                                                           |                                                                                                                                                |
|---------------------------------------------------------------------------------------------------------------------------------------------|---------------------------------------------------------------------------------------------------------------------------------------------------------------------------|------------------------------------------------------------------------------------------------------------------------------------------------|
| Porolak, Gabriel<br>PhD Candidate/Ecology and Conservation Biology<br>James Cook University<br>Australia                                    | Porri, Francesca<br>Scientist<br>South Africa                                                                                                                             | Port, Max<br>PhD candidate in physics<br>Max Planck Institute for Chemistry<br>Germany                                                         |
| Porta, Helena<br>Researcher/Molecular biology of plants<br>Instituto de Biotecnología, Universidad Nacional<br>Autónoma de México<br>Mexico | Portabella, Marcos<br>Staff Researcher<br>Institute of Marine Sciences (ICM-CSIC)<br>Spain                                                                                | Portail, Marie<br>Researcher in deep-sea ecology<br>France                                                                                     |
| Porter, Adam<br>Associate Professor<br>University of Massachusetts - Amherst<br>United States of America (the)                              | Porter, Brooke<br>Adjunct Professor/ Environmental Science<br>Umbra Institute<br>Italy                                                                                    | Porteus, Cosima<br>Postdoctoral fellow in Biosciences<br>University of Exeter<br>United Kingdom of Great Britain and Northern Ireland<br>(the) |
| Portheine, Stephan<br>PhD Molecular plant physiology / developmental biology<br>Hamburg university<br>Germany                               | Portier, Christopher<br>Environmental Health Researcher<br>Unaffiliated<br>Switzerland                                                                                    | Portillo-Estrada, Miguel<br>Post-doc researcher / ecophysiology<br>University of Antwerp<br>Belgium                                            |
| Portofee, Marcus<br>Biologist<br>United States of America (the)                                                                             | Posa, Mary Rose<br>Lecturer, Ecology<br>National University of Singapore<br>Singapore                                                                                     | Posada, David<br>Professor of Genetics<br>University of Vigo<br>Spain                                                                          |
| Posautz, Annika<br>Austria                                                                                                                  | Poso Volet, Danilo<br>PhD candidate<br>Universidade Estadual de Campinas<br>Brazil                                                                                        | Poss, Mary<br>Professor of Biology and Veterinary and Biomedical<br>Sciences<br>Penn State University<br>United States of America (the)        |
| Post, David<br>Senior Principal Research Hydrologist<br>CSIRO<br>Australia                                                                  | Postlethwait, John<br>Professor of Biology<br>University of Oregon<br>United States of America (the)                                                                      | Potgieter, Matthys<br>Lecturer in Zoology<br>Nelson Mandela University<br>South Africa                                                         |
| Potgieter Curry, Christina<br>Botanist & Bews Herbarium Senior Technician<br>University of KwaZulu-Natal<br>South Africa                    | Potter, Kevin<br>Research Associate Professor<br>Department of Forestry and Environmental Resources,<br>North Carolina State University<br>United States of America (the) | Potter, Tamara<br>Ecologist<br>NSW Department of Primary Industry - Forestry<br>Australia                                                      |
| Potti, Jaime<br>Researcher<br>CSIC<br>Spain                                                                                                 | Pottin, Karen<br>lecturer<br>université Pierre et Maris Curie, Paris 6<br>France                                                                                          | Potts, Alastair<br>Senior Lecturer and Researcher<br>Nelson Mandela University<br>South Africa                                                 |

|                                                                                                                                            |                                                                                                                                       |                                                                                                                           |
|--------------------------------------------------------------------------------------------------------------------------------------------|---------------------------------------------------------------------------------------------------------------------------------------|---------------------------------------------------------------------------------------------------------------------------|
| Potts, Malcolm<br>International family planning and girls education<br>University of California Berkeley<br>United States of America (the) | Potts, Timothy<br>Director / Archaeologist<br>J. Paul Getty Museum<br>United States of America (the)                                  | poudel, Basudev<br>Researcher, Msc. student/Biodiversity and environmental<br>management<br>Tribhuvan university<br>Nepal |
| Pouil, Simon<br>PhD student<br>University of La Rochelle<br>France                                                                         | Poulsen, Michael<br>Associate Professor<br>University of Copenhagen<br>Denmark                                                        | Pourmasoumi, Farzaneh<br>Germany                                                                                          |
| Pou-Rovira, Quim<br>Freshwater Ecology & Applied Conservation Biology<br>Sorelló, Estudis al Medi Aquàtic SL<br>Spain                      | Pourrut, Bertrand<br>Ass. Prof in Ecotoxicology<br>Yncrea Hauts de France - ISA Lille<br>France                                       | Poursanidis, Dimitris<br>Postdoctoral Researcher<br>Foundation for Research and Technology<br>Greece                      |
| POVEDA, GERMAN<br>Professor / Hydrology & Climate Change<br>UNIVERSIDAD NACIONAL DE COLOMBIA, SEDE MEDELLIN<br>Colombia                    | Poves, Alfredo<br>Professor of Physics<br>Universidad Autonoma de Madrid<br>Spain                                                     | Povilitis, Dr. Anthony<br>conservation biologist<br>Life Net<br>United States of America (the)                            |
| Powell, David Powell<br>Director of Research<br>Saint Louis Zoo<br>United States of America (the)                                          | Powell, Jennifer R.<br>Scientific Coordinator<br>Cloudbridge Nature Reserve<br>Costa Rica                                             | Powell, Luke<br>Research Fellow<br>Durham University<br>United Kingdom of Great Britain and Northern Ireland<br>(the)     |
| Power, Anne Marie<br>Lecturer in Marine Zoology<br>National University of Ireland Galway<br>Ireland                                        | Power, Colm<br>Human Security<br>Aarhus university<br>Denmark                                                                         | Power, John<br>Ecologist<br>Directorate of Biodiversity Management, North West<br>Provincial Government<br>South Africa   |
| Powers, Rae<br>Ecologist<br>The Xerces Society for Invertebrate Conservation<br>United States of America (the)                             | Pownall, Megan<br>Ecology Masters Student<br>Imperial College London<br>United Kingdom of Great Britain and Northern Ireland<br>(the) | Poznanovic, Goran<br>Head of Dept. of Molec. Biol.<br>Institute for Biological Research<br>Serbia                         |
| POZZI, Adrien C.<br>Assistant Researcher and Teacher in Microbial<br>Evolutionary Ecology<br>University of Lyon<br>France                  | Prada, Carlos<br>Assistant Professor -- Coral Reef Ecology<br>The University of Rhode Island<br>United States of America (the)        | Pradhan, Shreeti<br>Assistant Professor<br>Central Department of Botany<br>Nepal                                          |

|                                                                                                                                                                               |                                                                                                                                             |                                                                                                                                              |
|-------------------------------------------------------------------------------------------------------------------------------------------------------------------------------|---------------------------------------------------------------------------------------------------------------------------------------------|----------------------------------------------------------------------------------------------------------------------------------------------|
| Prado, Jefferson<br>Scientific Researcher - Botany<br>Instituto de Botânica<br>Brazil                                                                                         | PRADO, LIVIA PIRESL<br>PHD student<br>Museu Paraense Emílio Goeldi<br>Brazil                                                                | Prado, Valentina<br>Assistant Professor<br>Leiden University<br>Netherlands (the)                                                            |
| Præbel, Kim<br>Associate Professor<br>Norwegian College of Fishery Science, University of<br>Tromsø<br>Norway                                                                 | Prainsack, Barbara<br>Professor, regulatory, social and ethical aspects of<br>biomedicine and bioscience<br>University of Vienna<br>Austria | Prakoso, Budi<br>Lecturer/Agricultural Biotechnology<br>Soedirman University<br>Indonesia                                                    |
| Prance, Ghilleen<br>Director Emeritus<br>Royal Botanic Gardens, Kew<br>United Kingdom of Great Britain and Northern Ireland<br>(the)                                          | Prando, Jádila<br>Researcher<br>Universidade Federal do Rio de Janeiro<br>Brazil                                                            | Prasad, Soumya<br>ASSITANT PROFESSOR (ECOLOGY)<br>JAWAHARLAL NEHRU UNIVERSITY<br>India                                                       |
| Prat, Narcís<br>Catedràtic d'Ecologia<br>Universitat de Barcelona<br>Spain                                                                                                    | Prat, Valentine<br>Post-doctoral researcher, Cardiology, Veterinary Medicine<br>IHU Liryc<br>France                                         | Prather, Chelse<br>Assistant Professor of Biology<br>University of Dayton<br>United States of America (the)                                  |
| Pratt, Jessica<br>Assistant Professor of Teaching, Ecology and Evolutionary<br>Biology<br>University of California, Irvine<br>United States of America (the)                  | Pratt, R. Brandon<br>Professor of Biology<br>California State University, Bakersfield<br>United States of America (the)                     | Pravia, Ainoa<br>PhD student<br>The University of the Highlands and Islands<br>United Kingdom of Great Britain and Northern Ireland<br>(the) |
| Prebble, Clare<br>PhD Student Marine Biologist/Biochemist<br>University of Southampton, UK<br>United Kingdom of Great Britain and Northern Ireland<br>(the)                   | Predavec, Martin<br>President<br>Royal Zoological Society of New South Wales<br>Australia                                                   | Preece, Catherine<br>Post-doctoral researcher<br>CREAF<br>Spain                                                                              |
| Preece, Luke<br>Northern Australia Conservation Officer<br>The Nature Conservancy<br>Australia                                                                                | Preece, Noel<br>Principal Research Fellow<br>James Cook University<br>Australia                                                             | Préfontaine, Stéphanie<br>MSc Student/Ecology<br>Université de Sherbrooke<br>Canada                                                          |
| Premier, Giuliano Claudio<br>Emeritus Professor, Low Carbon Systems Engineering<br>University of South Wales<br>United Kingdom of Great Britain and Northern Ireland<br>(the) | Premier, Joe<br>Scientific coordination<br>Bavarian Forest National Park<br>Germany                                                         | Prendergast, Kit<br>PhD researcher<br>Curtin University<br>Australia                                                                         |

|                                                                                                                                |                                                                                                                                   |                                                                                                                                                      |
|--------------------------------------------------------------------------------------------------------------------------------|-----------------------------------------------------------------------------------------------------------------------------------|------------------------------------------------------------------------------------------------------------------------------------------------------|
| Prendini, Elizabeth<br>Research Associate, Herpetology<br>American Museum of Natural History<br>United States of America (the) | Prendini, Lorenzo *<br>Curator of Arachnida and Myriapoda<br>American Museum of Natural History<br>United States of America (the) | Preskett, Dr. David<br>Forester and Chemist<br>BioComposites Centre, Bangor University<br>United Kingdom of Great Britain and Northern Ireland (the) |
| Presley, Steven<br>Postdoctoral Associate, Ecologist<br>University of Connecticut<br>United States of America (the)            | Prestele, Reinhard<br>PhD Researcher, Land Use - Climate interactions<br>Vrije Universiteit Amsterdam<br>Netherlands (the)        | Preston, Mel<br>Rangeland Ecologist<br>Point Blue Conservation Science<br>United States of America (the)                                             |
| Pretell, Mirella<br>MSc Environment and Sustainable Development<br>Congress of the Republic of Peru<br>Peru                    | Preuss, Inken<br>Deep Sea Monitoring<br>GEOMAR Helmholtz Center for Ocean Research Kiel<br>Germany                                | Prevedello, Jayme Augusto<br>Professor<br>Rio de Janeiro State University<br>Brazil                                                                  |
| Previattelli, Daniel<br>posdoc<br>São Paulo University<br>Brazil                                                               | Price, Catherine<br>Postdoctoral Researcher<br>University of Sydney<br>Australia                                                  | Price, Chloe<br>Graduate Environmental Scientist<br>Auckland Council<br>New Zealand                                                                  |
| Price, Cormac<br>PhD candidate (herpetologist)<br>University of KwaZulu-Natal<br>South Africa                                  | Price, Donald<br>Professor and Director<br>University of Nevada, Las Vegas<br>United States of America (the)                      | Price, Eluned<br>Research Manager<br>Durrell Wildlife Conservation Trust<br>Jersey                                                                   |
| Price, Frank<br>Biologist, Scholar-in-Residence<br>Hamilton Collge<br>United States of America (the)                           | Price, Liv<br>New Zealand                                                                                                         | Price, Mary<br>Professor of Biology, Emerita<br>University of California, Riverside<br>United States of America (the)                                |
| price, michael<br>PhD candidate<br>simon fraser university<br>Canada                                                           | Price, Nathan<br>Principal Marine Investigator/Coral Reef Ecologist<br>Frontier<br>Madagascar                                     | Price, Thomas<br>Masters Student Biology<br>University of Exeter<br>United Kingdom of Great Britain and Northern Ireland (the)                       |
| Prideaux, Gavin<br>Professor of Palaeontology<br>Flinders University<br>Australia                                              | Priess, Joerg A.<br>Senior scientist; environmental science<br>Helmholtz Centre for Environmental Science - UFZ<br>Germany        | Priest, MD, Neal<br>Emergency Medicine Specialist/ Physician<br>St. Mary's Hospital, Athens, GA<br>United States of America (the)                    |
| Priester, Carolina<br>Faculty<br>University of North Carolina Wilmington<br>United States of America (the)                     | Prieto, Iván<br>Postdoctoral position<br>Centro de Edafología y Biología Aplicada del Segura (CEBAS-CSIC)<br>Spain                | Prieto, Teresa<br>Professor/ Science Education<br>University of Málaga<br>Spain                                                                      |

|                                                                                                                                                                                                              |                                                                                                                                               |                                                                                                                     |
|--------------------------------------------------------------------------------------------------------------------------------------------------------------------------------------------------------------|-----------------------------------------------------------------------------------------------------------------------------------------------|---------------------------------------------------------------------------------------------------------------------|
| Prieto-Benítez, Samuel<br>Universidad Rey Juan Carlos Madrid<br>Spain                                                                                                                                        | Prieto-Lillo, Ezequiel *<br>Dr Biology<br>Valencia University<br>Spain                                                                        | Primpke, Sebastian<br>PostDoc / Biosciences<br>Alfred Wegener Institute<br>Germany                                  |
| PRINCE, KARINE<br>Postdoctoral Research Associate in Ecology<br>French National Museum of Natural History<br>France                                                                                          | Principe, Romina<br>Doctor in Biological Sciences - Teacher, Researcher<br>CONICET - Universidad Nacional de Río Cuarto, Córdoba<br>Argentina | Pringle, Catherine<br>ecosystem ecology<br>University of Georgia<br>United States of America (the)                  |
| Pringle, Ross<br>Ecology & Evolutionary Biology<br>Princeton University<br>United States of America (the)                                                                                                    | Prins, Herbert<br>Professor & Chair, Resource Ecology<br>Wageningen University<br>Netherlands (the)                                           | Prinzing, Andreas<br>Professor<br>Univ Rennes 1<br>France                                                           |
| Prior, Alison<br>PhD Water Engineering<br>University of Exeter<br>Australia                                                                                                                                  | Prior, Lynda<br>Forest ecology<br>University of Tasmania<br>Australia                                                                         | Priotto, Jose<br>Investigador y Docente Universitario<br>CONICET-UNRC<br>Argentina                                  |
| Prisacari, Viorel *<br>Dr. habilitate, PhD, Professor, Man Emeritus. Chief,<br>Department of Epidemiology<br>State University of Medicine and Pharmacy „Nicolae<br>Testemitanu”<br>Moldova (the Republic of) | Prive, Sean<br>Restoration Ecologist<br>Lomakatsi Restoration Project<br>United States of America (the)                                       | Privman, Eyal<br>Assistant professor of evolutionary and environmental<br>biology<br>University of Haifa<br>Israel  |
| Priyadarshini, K V R<br>Independent researcher in Ecology<br>Malaysia                                                                                                                                        | Proboste, Tatiana<br>PhD Candidate<br>The University of Queensland<br>Australia                                                               | PROBST, Anne *<br>Research Director<br>CNRS<br>France                                                               |
| Procaccini, Gabriele<br>Scientist in Marine Biology<br>Stazione Zoologica Anton Dohrn<br>Italy                                                                                                               | Proctor, Jenna Proctor<br>MREs student<br>United Kingdom of Great Britain and Northern Ireland<br>(the)                                       | Proctor, Terren<br>Vanderbilt University<br>United States of America (the)                                          |
| Proebsting, William<br>Dept. of Horticulture<br>Oregon State University<br>United States of America (the)                                                                                                    | Proença, Vânia<br>Researcher - Ecology<br>MARETEC - University of Lisbon<br>Portugal                                                          | Professor, Honor C.<br>Professor, Plant ecology and systematics<br>Department of Biology, Lund University<br>Sweden |
| Proffitt, Dr Geoffrey<br>Ecologist - Director of Knowledge Economy and<br>Engagement<br>Swansea University College of Science<br>United Kingdom of Great Britain and Northern Ireland<br>(the)               | Proios, Kostas<br>PhD student<br>Greece                                                                                                       | PROISY, Christophe<br>Researcher, Remote sensing of tropical forests<br>French Institute of Pondicherry<br>India    |

|                                                                                                                                           |                                                                                                                                         |                                                                                                               |
|-------------------------------------------------------------------------------------------------------------------------------------------|-----------------------------------------------------------------------------------------------------------------------------------------|---------------------------------------------------------------------------------------------------------------|
| Prokkola, Jenni<br>Post-doctoral researcher, Biology<br>University of Eastern Finland<br>Finland                                          | Prokop, Zofia M.<br>assistant professor, biology<br>Institute of Environmental Sciences, Jagiellonian<br>University in Krakow<br>Poland | Promponas, Vasilis<br>Assistant Professor<br>University of Cyprus<br>Cyprus                                   |
| PROSPERI, Juliana<br>Botanist, researcher<br>Cirad<br>France                                                                              | Proverbs, Tracey<br>Masters Student<br>University of Victoria<br>Canada                                                                 | Provete, Diogo<br>Professor of Ecology<br>Federal University of Mato Grosso do Sul<br>Brazil                  |
| Prowse, Thomas<br>Research Fellow, Mathematical Ecology<br>The University of Adelaide<br>Australia                                        | Prudhomme, Jorian<br>Medical entomologist, PhD<br>France                                                                                | Prugnette, Franck<br>Researcher Ecology / Evolution<br>Centre National de la Recherche Scientifique<br>France |
| Prunier, Jérôme<br>Postdoctoral researcher<br>CNRS<br>France                                                                              | Prunuske, Lizbeth<br>Restoration Ecologist<br>Prunuske Chatham, Inc.<br>United States of America (the)                                  | Pryor, Sophie<br>PhD candidate<br>National Marine Science Centre Southern Cross University<br>Australia       |
| Psaralexi, Maria<br>Researcher<br>Aristotle University of Thessaloniki / Callisto - Wildlife<br>and Nature Conservation Society<br>Greece | Puccia, Charles<br>Phd, System Ecology (retired)<br>Harvard School of Public Health<br>United States of America (the)                   | Puccinelli, Eleonora<br>Postdoctoral fellow in Marine Biology<br>University of Cape Town<br>South Africa      |
| Puechmaille, Sebastien<br>Assistant professor<br>University of Greifswald<br>Germany                                                      | Puentes, Chase<br>Marine Science Lab Technician<br>USC Wrigley Institute for Environmental Studies<br>United States of America (the)    | Puerta Domínguez, Guillermo<br>Chemical Engineer<br>KIT<br>Spain                                              |
| Puga, David<br>PhD Student<br>EMBL<br>Germany                                                                                             | Pugh, Andrew<br>Ecological Entomologist<br>Scion<br>New Zealand                                                                         | Pugnaire, Francisco<br>CSIC<br>Spain                                                                          |
| Puig i Boix, pep<br>PhD engineer<br>retired professor at the Autonomous University of<br>Barcelona<br>Spain                               | Puig Ventosa, Ignasi<br>Head of projects<br>Fundació ENT<br>Spain                                                                       | Puig-Gironès, Roger<br>Biodiversity researcher<br>Universitat de Girona - Universitat de Barcelona<br>Spain   |

|                                                                                             |                                                                                                                                                                                                                        |                                                                                                                                |
|---------------------------------------------------------------------------------------------|------------------------------------------------------------------------------------------------------------------------------------------------------------------------------------------------------------------------|--------------------------------------------------------------------------------------------------------------------------------|
| Pujari, Sidharam *<br>Research Associate<br>Wageningen university<br>Netherlands (the)      | Pujol, Benoit<br>CNRS Researcher / Evolutionary Ecology<br>CNRS, Laboratoire Évolution & Diversité Biologique (EDB UMR 5174), Université Fédérale de Toulouse Midi-Pyrénées, CNRS, ENSFEA, IRD, UPS, France.<br>France | Pulgarin Diaz, John Alexander<br>MSc Researcher<br>Corporación Colombiana de Investigación Agropecuaria-Corpoica<br>Colombia   |
| Pulkkinen, Henni<br>Reseacher<br>Natural Resources Institute Finland<br>Finland             | Pulotu, Challis<br>BSc Environmental Science and Biology<br>Pacific Adventist University<br>Papua New Guinea                                                                                                           | Pulsford, Stephanie<br>PhD scholar<br>Australian National University<br>Australia                                              |
| Puma, John<br>United States of America (the)                                                | Puncher, Gregory<br>Post-Doctoral Fellow (Marine Fisheries Genomics)<br>University of New Brunswick<br>Canada                                                                                                          | Puniwai-Ganoot, Noelani<br>Professor<br>University of Hawai'i at Mānoa<br>United States of America (the)                       |
| Punt, Peter Jan<br>Chief Technology officer<br>Dutch DNA Biotech BV<br>Netherlands (the)    | Pupin, Nadya<br>Collection manager<br>Universidade Estadual Paulista, Campus Rio Claro, São Paulo<br>Brazil                                                                                                            | Purcell, Brad<br>Project Officer, Kangaroo Management Program<br>Office of Environment and Heritage<br>Australia               |
| Purdie, Gordon<br>Senior Research Fellow<br>University of Otago, Wellington<br>New Zealand  | Purdie, Jen<br>Climate Scientist<br>New Zealand                                                                                                                                                                        | Puritz, Jonathan<br>Assistant Professor<br>University of Rhode Island<br>United States of America (the)                        |
| Purton, Chris<br>Astrophysics<br>National Research Council<br>Canada                        | Purvis, Dustin<br>West Virginia University<br>United States of America (the)                                                                                                                                           | Pütz, Peter<br>Statistician<br>University of Göttingen<br>Germany                                                              |
| Putzke, Jair<br>Professor<br>Universidade Fedral do Pampa<br>Brazil                         | Puyravaud, Jean-Philippe<br>Conservation biologist<br>Sigur Nature Trust<br>India                                                                                                                                      | Pye, Marian<br>Lecturer, Freshwater Ecology<br>Bangor University<br>United Kingdom of Great Britain and Northern Ireland (the) |
| Pyhälä, Aili<br>Lecturer in Development Studies<br>University of Helsinki<br>Finland        | Pyke, Graham<br>Professor<br>University of Technology Sydney<br>Australia                                                                                                                                              | Pyle, Nathaniel<br>Sociology Professor<br>Laney College<br>United States of America (the)                                      |
| Pyle, Richard L.<br>Zoologist<br>Bernice P. Bishop Museum<br>United States of America (the) | Pyšek, Petr<br>Professor of Ecology<br>Institute of Botany, Czech Academy of Sciences, and Charles University in Prague<br>Czech Republic (the)                                                                        | QAYYOUM, MUHAMMAD ASIF *<br>Dr<br>searching<br>Pakistan                                                                        |



|                                                                                                                                                      |                                                                                                  |                                                                                                                                                          |
|------------------------------------------------------------------------------------------------------------------------------------------------------|--------------------------------------------------------------------------------------------------|----------------------------------------------------------------------------------------------------------------------------------------------------------|
| Quadra, Gabrielle *<br>Brazil                                                                                                                        | Quadros, Isabel<br>Professor of psychobiology<br>Universidade Federal de São Paulo<br>Brazil     | Quaglietta, Lorenzo<br>Post-doc fellow<br>CIBIO<br>Portugal                                                                                              |
| Quan, Yuanyuan<br>MSc student<br>Chinese Academy of Sciences<br>China                                                                                | Quartararo, Christopher<br>United States of America (the)                                        | Quartermain, Evan<br>Ecologist<br>Humane Society International Australia<br>Australia                                                                    |
| QUAZI, Shimona<br>Post-Doctoral Researcher, Forest Ecology<br>Department of Botany, University of Hawaii at Manoa<br>United States of America (the)  | Queirolo, Diego<br>Professor<br>Universidad de la República<br>Uruguay                           | Queiroz, Antonio<br>PhD candidate, Applied Ecology<br>Universidade Federal de Lavras<br>Brazil                                                           |
| Queiroz, Helder<br>Reseacher<br>Mamirauá Institute for Sustainable Development<br>Brazil                                                             | Queiroz Souza, Caren *<br>Ecology and Conservation<br>Federal University of Bahia<br>Brazil      | Queller, David<br>Spencer T. Olin Professor in Biology<br>Washington University in St. Louis<br>United States of America (the)                           |
| Quer, Susanna<br>Marine Biologist<br>Spain                                                                                                           | Queralt, Ignasi *<br>Research Scientist<br>CSIC-Spanish Council for Scientific Research<br>Spain | Querejeta, José Ignacio<br>Staff scientist<br>Spanish Research Council<br>Spain                                                                          |
| Quero, Jose Luis<br>Assistant Professor<br>University of Cordoba, Forestry Department<br>Spain                                                       | Quesado, Leticia *<br>Ecology<br>Universidade do Rio Grande do Norte<br>Brazil                   | Quevedo, Mario<br>Associate professor; ecology<br>Oviedo University<br>Spain                                                                             |
| Quezada-Euán, José Javier<br>Head Department of Tropical Apiculture/Pollination<br>ecology, bee biology<br>Universidad Autónoma de Yucatán<br>Mexico | Quezada-Romegialli, Claudio<br>Fondecyt Postdoc<br>University of Antofagasta<br>Chile            | Quijada, Adrian<br>Science Faculty, Biology<br>Tohono O'odham Community College<br>United States of America (the)                                        |
| Quilichini, Angelique<br>professor assistant<br>Universite de Toulouse (Paul Sabatier)<br>France                                                     | Quillfeldt, Petra<br>professor, biology<br>Justus Liebig University Giessen<br>Germany           | Quilodran Venegas, Claudio<br>Researcher<br>Department of Zoology. University of Oxford<br>United Kingdom of Great Britain and Northern Ireland<br>(the) |
| Quinby, Peter<br>Chief Scientist<br>Ancient Forest Exploration & Research<br>Canada                                                                  | Quindroit, Paul<br>PhD student<br>INERIS<br>France                                               | Quinkler, Theresa<br>Molecular Biologist<br>EMBL<br>Germany                                                                                              |

|                                                                                                                               |                                                                                                                                                                    |                                                                                                                                                             |
|-------------------------------------------------------------------------------------------------------------------------------|--------------------------------------------------------------------------------------------------------------------------------------------------------------------|-------------------------------------------------------------------------------------------------------------------------------------------------------------|
| Quiñones, Joaquin<br>Profesor Asistente<br>Universidad Militar Nueva Granada<br>Colombia                                      | Quintana, Rubén<br>Principal Researcher<br>CONICET<br>Argentina                                                                                                    | Quintana Morales, Eréndira<br>Archaeology<br>Rice University<br>United States of America (the)                                                              |
| Quintana-Ascencio, Pedro<br>Professor<br>University of Central Florida<br>United States of America (the)                      | Quintas-Soriano, Cristina<br>PostDoc Associate<br>Idaho State University<br>United States of America (the)                                                         | Quintero, Carolina<br>Chemical ecologist<br>INIBIOMA, CONICET Bariloche<br>Argentina                                                                        |
| Quiquampoix, Hervé<br>Senior scientist<br>INRA<br>France                                                                      | Quirion, Philippe<br>Senior researcher, economics<br>CNRS, CIRED<br>France                                                                                         | Quirk, Zachary<br>Graduate Student, Paleobotany<br>Ohio University<br>United States of America (the)                                                        |
| Quiroga, Rodrigo<br>Bioinformatics<br>CONICET<br>Argentina                                                                    | Quirós Collazos, Lucía<br>PhD student in paleoceanography<br>Institute of Marine Science (CSIC)<br>Spain                                                           | Qureshi, Salman<br>Research Scientist/Urban and Landscape Ecology<br>Humboldt University of Berlin<br>Germany                                               |
| Qureshi, Yaser<br>Assistant Professor (Zoology)<br>Government College Khertha, District Balod, State<br>Chhattisgarh<br>India | R R de Mello, Thiago<br>PhD student<br>Universidade de Brasília<br>Brazil                                                                                          | R. Cunha, Eduardo<br>PhD Student<br>Universidade Estadual de Maringá<br>Brazil                                                                              |
| R. Silva, Rogerio<br>Adjunct Researcher<br>Museu Paraense Emilio Goeldi<br>Brazil                                             | Raasch, Josefine<br>Research Fellow<br>Ruhr University Bochum<br>Germany                                                                                           | Raatikainen, Kaisa J.<br>PhD student<br>University of Jyväskylä, Department of Biological and<br>Environmental Science<br>Finland                           |
| Raavi, Sai Santosh Kumar<br>Assistant Professor<br>IIT Hyderabad<br>India                                                     | Rabaça, João E.<br>Assistant Professor, Conservation Biology<br>LabOr-Laboratory of Ornithology, ICAAM / Department of<br>Biology, University of Évora<br>Portugal | Rabaiotti, Daniella<br>PhD candidate<br>Institute of Zoology, Zoological Society of London<br>United Kingdom of Great Britain and Northern Ireland<br>(the) |
| Rabelo, Rafael<br>PhD Candidate in Ecology<br>National Institute for Amazon Research<br>Brazil                                | Rabenold, Kerry<br>Professor Emeritus of Biocal Sciences -- Ecology<br>Purdue University<br>United States of America (the)                                         | Rabinovici, Andrea<br>Chief of Staff at the Rector's Office and Professor<br>Universidade Federal de São Paulo<br>Brazil                                    |
| Racine, Sarah<br>Assistant Professor of Psychology<br>McGill University<br>Canada                                             | Rada, Patricia<br>Postdoctoral Researcher<br>CSIC<br>Spain                                                                                                         | Radashevsky, Vasily<br>Senior scientist<br>Russian Academy of Sciences<br>Russian Federation (the)                                                          |

|                                                                                                                                                       |                                                                                                                     |                                                                                                                                                                                              |
|-------------------------------------------------------------------------------------------------------------------------------------------------------|---------------------------------------------------------------------------------------------------------------------|----------------------------------------------------------------------------------------------------------------------------------------------------------------------------------------------|
| Rader, Russell<br>Professor of Aquatic Ecology<br>Brigham Young University<br>United States of America (the)                                          | Radic, Ksenija<br>PhD student<br>EMBL<br>Germany                                                                    | Radinger, Johannes<br>Postdoctoral researcher, river ecology<br>Leibniz-Institute of Freshwater Ecology and Inland<br>Fisheries (IGB), Berlin<br>Germany                                     |
| Radloff, Frans G. T.<br>Senior lecturer, Department of Conservation and Marine<br>Sciences<br>Cape Peninsula University of Technology<br>South Africa | Radoux, Julien<br>Geomatics<br>Université catholique de Louvain<br>Belgium                                          | Radovic, Jagos<br>Postdoctoral Fellow/Environmental Geochemist<br>University of Calgary<br>Canada                                                                                            |
| Radujkovic, Dajana<br>PhD student in Biology<br>University of Antwerp<br>Bosnia and Herzegovina                                                       | Radwan, Jacek<br>Professor of Evolutionary Biology<br>Adam Mickiewicz University in Poznań<br>Poland                | Radzeviciute, Rita<br>Biologist<br>Leipzig University, Martin Luther University Halle-<br>Wittenberg<br>Germany                                                                              |
| Raeesi Chahartaghi, Niloufar<br>MSc Conservation Science<br>Imperial College London<br>Iran (Islamic Republic of)                                     | Raes, Eric Jorden<br>Postdoc<br>Alfred Wegener Institute<br>Germany                                                 | Raeymaekers, Joost<br>Professor in Evolutionary Ecology and Conservation<br>Biology<br>Nord University<br>Norway                                                                             |
| Rafacho, Alex<br>Assistant professor in Human Physiology<br>Universidade Federal de Santa Catarina<br>Brazil                                          | Raffa, Kenneth<br>Professor<br>University of Wisconsin - Madison<br>United States of America (the)                  | Rago, Luzia<br>History<br>Universidade estadual de Campinas Unicamp<br>Brazil                                                                                                                |
| Rago, Luzia Margareth<br>professor on History<br>UNIVERSIDADE ESTADUAL DE CAMPINAS<br>Brazil                                                          | RAGUENES, Olivier<br>France                                                                                         | Rahbek, Carsten<br>Professor of Biodiversity and Center Director<br>Center of Macroecology, Evolution and Climate, Natural<br>History Museum of Denmark, University of Copenhagen<br>Denmark |
| Rahman, Mofizur *<br>Research Investigator/ Environmental Science<br>icddr,b<br>Bangladesh                                                            | Rahmstorf, Stefan<br>Professor of Physics of the Oceans<br>Potsdam Institute for Climate Impact Research<br>Germany | Raicevic, Vera<br>professor Microbial Ecology<br>University of Belgrade Faculty of Agriculture<br>Serbia                                                                                     |
| Rail, Genevieve<br>Professor of Feminist Cultural Studies of Health<br>Concordia University<br>Canada                                                 | Rainero, Liliana<br>Arquitecta<br>Universidad Nacional de Cordoba<br>Argentina                                      | Rainey, Paul<br>Director<br>Max Planck Institute for Evolutionary Biology<br>Germany                                                                                                         |

|                                                                                                                                                                                                                                                                                                                                      |                                                                                                                            |                                                                                                                                                                                           |
|--------------------------------------------------------------------------------------------------------------------------------------------------------------------------------------------------------------------------------------------------------------------------------------------------------------------------------------|----------------------------------------------------------------------------------------------------------------------------|-------------------------------------------------------------------------------------------------------------------------------------------------------------------------------------------|
| Rainham, Daniel<br>Associate Professor, Population Health Science<br>Dalhousie University<br>Canada                                                                                                                                                                                                                                  | Raiser, Georg<br>Dipl. Biologist<br>University of Konstanz<br>Germany                                                      | Raisin, Claire<br>Conservation biology<br>Chester Zoo<br>United Kingdom of Great Britain and Northern Ireland<br>(the)                                                                    |
| Raitt, Lincoln<br>Emeritus Professor, Plant Ecophysiology<br>Univeristy of the Western Cape<br>South Africa                                                                                                                                                                                                                          | Raizer, Josué<br>Professor<br>Federal University of Grande Dourados<br>Brazil                                              | Raj, Rahul<br>Postdoctoral Research Fellow<br>University of Twente<br>Netherlands (the)                                                                                                   |
| Raja, Maria<br>Spain                                                                                                                                                                                                                                                                                                                 | Rajaei, Hossein *<br>Germany                                                                                               | Rajamanickam, Muthucumaraswamy *<br>Dean(Research), Professor and Head<br>Sri Venkateswara College of Engineering<br>India                                                                |
| Ram, Dafne<br>PhD student<br>Lund University<br>Sweden                                                                                                                                                                                                                                                                               | Ramachandran, Nishanthan<br>Doctor (Medical)<br>University of Otago<br>New Zealand                                         | Ramachandran, Ramesh<br>Alumnus of the Post Graduate Program in Wildlife<br>Biology and Conservation<br>WCS-India Program, National Center for Biological<br>Sciences, Bangalore<br>India |
| RAMADE, François *<br>Emeritus Professor of Ecology and Zoology, Honour<br>President of the French Ecological Society and of the<br>French National Society for Nature Conservancy (SNPN)<br>IUCN Honour Member<br>Laboratory Ecology, Systematics, Evolution Bat 362<br>Sciences Faculty of Orsay University of Paris Sud<br>France | RAMADOSS, NIVEDITHA<br>United States of America (the)                                                                      | RAMAHAVELO, Jean Luc<br>Fisheries Technician Support<br>Blue Ventures<br>Madagascar                                                                                                       |
| Ramakers, Jip<br>Ecology and Evolution<br>Netherlands Institute of Ecology (NIOO-KNAW)<br>Netherlands (the)                                                                                                                                                                                                                          | Ramalho, Ana Carolina<br>Veterinarian<br>Universidade de Brasília<br>Brazil                                                | Ramalho, Emiliano<br>Monitoring Coordinator and Researcher<br>Mamirauá Sustainable Development Institute<br>Brazil                                                                        |
| Ramalho, Quezia *<br>Teacher and Student/ member of the Landscape Ecology<br>Laboratory (LEPai)<br>UERJ<br>Brazil                                                                                                                                                                                                                    | Ramalho von Behr, Klaus<br>student - history<br>UNICAMP - IFCH<br>Brazil                                                   | Ramallo, Virginia<br>Biological Anthropology Researcher<br>National Scientific and Technical Research Council<br>(CONICET)<br>Argentina                                                   |
| Ramanan, Siddharth<br>PhD student<br>University of Sydney<br>Australia                                                                                                                                                                                                                                                               | Ramanand, Sarisha<br>PhD Student and Consultant (Climate Change Adaptation)<br>University of KwaZulu Natal<br>South Africa | Ramarosandratana, Aro Vonjy<br>Botanist<br>University of Antananarivo<br>Madagascar                                                                                                       |

|                                                                                                                                                                                                              |                                                                                                                                                   |                                                                                                                                              |
|--------------------------------------------------------------------------------------------------------------------------------------------------------------------------------------------------------------|---------------------------------------------------------------------------------------------------------------------------------------------------|----------------------------------------------------------------------------------------------------------------------------------------------|
| Ramaswamy, Jayaram *                                                                                                                                                                                         | RAMIREZ, ALBERTO<br>PROFESSOR ENVIRONMENTAL STUDIES<br>PONTIFICIA UNIVERSIDAD JAVERIANA, BOGOTÁ<br>Colombia                                       | RAMIREZ, PATRICIA<br>PROFESSOR<br>UNIVERSIDAD AUTONOMA METROPOLITANA<br>Mexico                                                               |
| Ramirez, Sara<br>CERTIFIED TURTLE APPROVED Program Officer /<br>Conservation Biology<br>St. Kitts Sea Turtle Monitoring Network<br>Saint Kitts and Nevis                                                     | Ramírez, Alejandro<br>Social-ecological systems modelling<br>Social-ecological systems Lab Universidad Católica de<br>Chile<br>Chile              | Ramírez, Guillermo<br>PhD Student<br>Pontificia Universidad Católica de Chile<br>Chile                                                       |
| Ramírez de Paz, Miguel Ángel<br>Researcher. Animal Reproduction Science.<br>Departamento de Reproducción Animal. Instituto<br>Nacional de Investigación y Tecnología Agraria y<br>Alimentaria. INIA<br>Spain | Ramírez Martínez, María Magdalena<br>Professor<br>Universidad de Guadalajara<br>Mexico                                                            | Ramirez Orjuela, Carolina<br>Project Coordinator/BIOLOGIST<br>INERCO COLOMBIA<br>Colombia                                                    |
| Ramirez-Gallego, Cristian<br>Executive Director / Biologist<br>Fundación Tortugas del Mar<br>Colombia                                                                                                        | Ramírez-Macías, Dení<br>Researcher / Marine biologist, sharks and rays.<br>ConCiencia México<br>Mexico                                            | Ramírez-Mejía, Andrés F<br>Biologist<br>Pontificia Universidad Javeriana<br>Colombia                                                         |
| Ramírez-Santiago, Guillermo<br>Research Professor<br>Universidad Nacional Autónoma de México<br>Mexico                                                                                                       | Ramírez-Valdez, Arturo<br>Marine Biology Research Division<br>Scripps Institution of Oceanography, UC San Diego<br>United States of America (the) | Ramirez-Zierold, Jorge Alberto<br>Associate Researcher in Biogeochemistry<br>Institute for Marine Sciences and Limnology, U.N.A.M.<br>Mexico |
| Rammig, Anja<br>Associate Professor<br>Technical University of Munich<br>Germany                                                                                                                             | Ramón, Giovanni<br>Professor/Entomologist<br>Universidad San Francisco de Quito<br>Ecuador                                                        | Ramón, Pablo<br>Universidad Técnica Particular de Loja<br>Ecuador                                                                            |
| Ramon Mercau, Josefina<br>Postdoctoral Researcher in Paleoecology<br>Andean Studies Institute, University of Buenos Aires<br>Argentina                                                                       | Ramos, Carlos<br>Professor<br>University of Campinas UNICAMP<br>Brazil                                                                            | Ramos, Davi<br>Student<br>Universidade de Brasília<br>Brazil                                                                                 |
| Ramos, Eduardo<br>Professor<br>Universidad Nacional Autónoma de México<br>Mexico                                                                                                                             | Ramos, Eliana<br>Plant Taxonomy<br>Brazil                                                                                                         | Ramos, Giselle<br>Biologist<br>Instituto Venezolano de Investigaciones Científicas<br>Venezuela (Bolivarian Republic of)                     |
| Ramos, Kelli<br>Postdoctoral Researcher, Entomology<br>Museum of Zoology, University of São Paulo (MZUSP)<br>Brazil                                                                                          | Ramos, Margarida<br>Professor<br>Faculty of Sciences. University of Lisbon<br>Portugal                                                            | Ramos, Miguel Angel<br>Faculty Professor of Physics<br>Universidad Autonoma de Madrid<br>Spain                                               |

|                                                                                                                                           |                                                                                                                                     |                                                                                                                  |
|-------------------------------------------------------------------------------------------------------------------------------------------|-------------------------------------------------------------------------------------------------------------------------------------|------------------------------------------------------------------------------------------------------------------|
| Ramos, Renato<br>Biologist<br>Unicamp<br>Brazil                                                                                           | Ramos Hryb, Ana Belen<br>Postdoc<br>Federal University of Santa Catarina, UFSC<br>Brazil                                            | Ramos-Esplá, Alfonso A.<br>Senior Professor<br>University of Alicante<br>Spain                                   |
| Ramos-Fabiel, Melbi<br>PhD Student<br>Institute of Geology, National Autonomous University of Mexico, UNAM<br>Mexico                      | Rampasso, Augusto Santos<br>Graduate student<br>Universidade de São Paulo<br>Brazil                                                 | rams, dan<br>biologist<br>United States of America (the)                                                         |
| Ramsden, David<br>Head of Conservation<br>Barn Owl Trust<br>United Kingdom of Great Britain and Northern Ireland (the)                    | Ramsperger, Anja<br>PhD Student<br>University of Bayreuth<br>Germany                                                                | Ranaldo, Marzia<br>PhD - Agriculture<br>Sant'Anna school of Advanced Studies, Pisa, Italy<br>Italy               |
| Ranalli, Giancarlo *<br>Full Prof. Environmental Microbiology<br>DIBT University of Molise<br>Italy                                       | Ranatunga, Dhahara<br>Natural Science Collection Manager<br>Auckland Museum<br>New Zealand                                          | Randall, Jan<br>Professor emerita in biology<br>San Francisco state university<br>United States of America (the) |
| Randall, Roderick<br>Research Officer, Invasive Species<br>Dept Primary Industries and Regional Deveopment<br>Australia                   | Randera-Rees, Samir<br>Conservation Professional and CEO<br>WWF and Whispers of the Wild<br>South Africa                            | Randi, Marco<br>Professor - Cell Biology<br>Federal University of Parana<br>Brazil                               |
| Randolph, Shannon<br>Postdoctoral Associate<br>San Diego Zoo Global<br>United States of America (the)                                     | Rannap, Riinu<br>Research Fellow in Conservation Biology<br>Institute of Ecology and Earth Sciences, University of Tartu<br>Estonia | Ranpal, Surendra<br>MSc Student<br>University of Greifswald<br>Germany                                           |
| Ranson, Helen<br>Tutor<br>Waikato Institute of Technology<br>New Zealand                                                                  | Rao, Sathyanarayan<br>Fonds de la recherche scientifique Research fellowship<br>Université catholique de Louvain<br>Belgium         | Rao, Shishir *<br>Research consultant<br>Center for wildlife studies<br>India                                    |
| Raper, Chris<br>Entomologist & taxonomist<br>Natural History Museum, London<br>United Kingdom of Great Britain and Northern Ireland (the) | Raposeiro, Pedro<br>Ecology<br>University of the Azores<br>Portugal                                                                 | Raposo, Marcos<br>Professor - Bird Classification<br>Univeesidade Federal do Rio de Janeiro<br>Brazil            |

|                                                                                                                                                                                                                                                                                                                                    |                                                                                                                            |                                                                                                                               |
|------------------------------------------------------------------------------------------------------------------------------------------------------------------------------------------------------------------------------------------------------------------------------------------------------------------------------------|----------------------------------------------------------------------------------------------------------------------------|-------------------------------------------------------------------------------------------------------------------------------|
| Raposo, Pedro<br>Biologist, Director of the Graciosa Environment Service,<br>Director of the Graciosa Natural Park, Manager of the<br>Graciosa Island Biosphere Reserve<br>Regional Directorate for the Environment, Regional<br>Secretariat for Energy, Environment and Tourism,<br>Regional Government of the Azores<br>Portugal | Raposo do Amaral, Fabio<br>Adjunct Professor<br>Federal University of Sao Paulo<br>Brazil                                  | Rapp, Joshua<br>Forest Ecologist<br>Harvard Forest<br>United States of America (the)                                          |
| Rapp de Eston, Marilda<br>Biologist<br>Forest Institute<br>Brazil                                                                                                                                                                                                                                                                  | Rasche, Livia<br>Researcher Sustainability<br>Universität Hamburg<br>Germany                                               | Rasekh, Nima<br>Graduate Student, Mathematics<br>University of Illinois at Urbana Champaign<br>United States of America (the) |
| Rashni, Bindiya<br>Freshwater Ecologist<br>NatureFiji-MareqetiViti<br>Fiji                                                                                                                                                                                                                                                         | Raskoff, Kevin<br>Chair of Biology Department<br>Monterey Peninsula College<br>United States of America (the)              | Rasmussen, Henrik Barner<br>Zoology<br>Savannah Tracking<br>Kenya                                                             |
| Rasmussen, Jerry<br>Biologist (Retired)<br>U.S. Fish and Wildlife Service<br>United States of America (the)                                                                                                                                                                                                                        | Rasolonjatovo, Safidy Malala<br>PhD student in Zoology and Animal Conservation<br>University of Antananarivo<br>Madagascar | Rasotto, Maria<br>Professor of Comparative Anatomy<br>University of Padua<br>Italy                                            |
| Rasplus, Jean-Yves<br>Director of Research<br>INRA (French National Institute for Agricultural Research)<br>France                                                                                                                                                                                                                 | Rastelli, Eugenio<br>Research Scientist<br>Stazione Zoologica Anton Dohrn<br>Italy                                         | Rastogi, Bharat<br>Graduate student, Forest Ecosystems and Society<br>Oregon State University<br>India                        |
| Ratcliffe, Brett<br>Professor and Curator, Systematic Entomology<br>University of Nebraska<br>United States of America (the)                                                                                                                                                                                                       | Rathgeber, Cyrille B. K.<br>Senior Researcher<br>INRA<br>France                                                            | Ratliff, Rachel<br>Freshwater Scientist<br>Grand Valley State University<br>United States of America (the)                    |
| Ratzbor, Ronja<br>PhD Student Plant Ecology<br>University of Tübingen<br>Germany                                                                                                                                                                                                                                                   | Ratzlaff, Allen<br>Wildlife Biologist<br>U.S. Fish and Wildlife Service<br>United States of America (the)                  | Rau, Jaime R.<br>Full professor of Ecology<br>Universidad de Los Lagos, Campus Osorno<br>Chile                                |
| Rault, Jonathan<br>Ecology<br>France                                                                                                                                                                                                                                                                                               | Rausser, Casandra<br>Urban Sustainability<br>UCLA<br>United States of America (the)                                        | Rautsaw, Rhett<br>Ph.D. Student in Biological Sciences<br>Clemson University<br>United States of America (the)                |

|                                                                                                                                             |                                                                                                         |                                                                                                                                                        |
|---------------------------------------------------------------------------------------------------------------------------------------------|---------------------------------------------------------------------------------------------------------|--------------------------------------------------------------------------------------------------------------------------------------------------------|
| Raux, Pascal<br>Researcher, Economist<br>University of Brest, European Institute for Marine Studies (IUEM)<br>France                        | Ravaneda Garcia, Nicoli<br>Biologic Sciences student<br>Universidade Paulista<br>Brazil                 | Ravara, Ascensão<br>Postdoc<br>Universidade de Aveiro<br>Portugal                                                                                      |
| Raven, Han<br>Research Associate<br>Naturalis Biodiversity Center, Leiden<br>Netherlands (the)                                              | Raven, Peter<br>Plant sciences<br>Missouri Botanical Garden<br>United States of America (the)           | Ravi, Sreenivasan<br>Professor of Statistics<br>University of Mysore<br>India                                                                          |
| Raviv, Tal<br>Senior Lecturer/ Industrial Engineering<br>Tal Raviv<br>Israel                                                                | Rawal, Lal<br>Public health<br>Nepal                                                                    | Rawson, Andrew<br>Associate Professor<br>Charles Sturt University<br>Australia                                                                         |
| Ray, Carleton<br>Research Professor<br>University of Virginia<br>United States of America (the)                                             | Ray, Matt<br>M.A.Sc - Environmental Engineering graduate<br>University of Windsor<br>Canada             | Raya Rey, Andrea N<br>Researcher<br>CADIC-CONICET<br>Argentina                                                                                         |
| Raymond, Michel<br>Research Director<br>CNRS<br>France                                                                                      | Raymundo, Laurie<br>Professor of Marine Biology<br>University of Guam Marine Laboratory<br>Guam         | Raynolds, Martha<br>Arctic Ecology<br>University of Alaska Fairbanks<br>United States of America (the)                                                 |
| Raza, Hana<br>Conservation Biologist<br>Nature Iraq<br>Iraq                                                                                 | Razanajatovo, Mialy<br>Postdoc Plant Ecology<br>University of Konstanz<br>Germany                       | RAZZAUTI SANFELIU, Maria<br>postdoc<br>INRA<br>France                                                                                                  |
| Re, Viviana<br>Postdoctoral Research Fellow in hydrogeology<br>University of Pavia, Department of Earth and Environmental Sciences<br>Italy | Read, Geoffrey<br>Marine biologist<br>NIWA<br>New Zealand                                               | Read, John<br>Adjunct Lecturer Earth and Environmental Sciences<br>University of Adelaide<br>Australia                                                 |
| Reading, Richard<br>Director of Research and Conservation<br>Butterfly Pavilion<br>United States of America (the)                           | Real, Francisco X<br>Professor of Cell Biology, Group Leader<br>Universitat Pompeu Fabra; CNIO<br>Spain | Reaves, Jr. CF, Earl D.<br>Certified Forester<br>United States of America (the)                                                                        |
| Reavis, Robert<br>Residential Faculty, Biology<br>Glendale Community College, AZ<br>United States of America (the)                          | Rebello, Fabrício<br>Professor<br>Universidade Federal Rural da Amazônia<br>Brazil                      | Rebelo, Alanna<br>Doctoral Student: conservation biology,<br>freshwater/wetland ecology<br>Stellenbosch University; Antwerp University<br>South Africa |



|                                                                                                                                                                   |                                                                                                                                                                                     |                                                                                                                                                                                                               |
|-------------------------------------------------------------------------------------------------------------------------------------------------------------------|-------------------------------------------------------------------------------------------------------------------------------------------------------------------------------------|---------------------------------------------------------------------------------------------------------------------------------------------------------------------------------------------------------------|
| Rebelo, Hugo<br>Auxiliar Researcher<br>CIBIO/InBIO, University of Porto<br>Portugal                                                                               | Rebelo, Lisa-Maria<br>Senior Researcher<br>International Water Management Institute<br>Kenya                                                                                        | Rebelo, Rui<br>Professor and researcher on Invasion Ecology/<br>Conservation Biology<br>Faculty of Sciences, University of Lisbon, and Centre for<br>Ecology, Evolution and Environmental Changes<br>Portugal |
| Rebelo, Tony<br>Conservation Biologist<br>South African National Biodiversity Institute<br>South Africa                                                           | Rebola Lichtenberg, Jessica<br>Germany                                                                                                                                              | Reboleira, Ana<br>Assistant Professor<br>University of Copenhagen<br>Denmark                                                                                                                                  |
| Rebollo-Hernanz, Miguel<br>PhD Student in Food Chemistry<br>Institute of Food Science Research (CIAL, UAM-CSIC)<br>Spain                                          | Rebouças, Mônica *<br>Brazil                                                                                                                                                        | Rebstock, Ginger A.<br>University of Washington, Biology Department<br>United States of America (the)                                                                                                         |
| Recalde Salas, Angela<br>PhD Candidate - Applied Physics and Conservation Science<br>Centre for Marine Science and Technology - Curtin<br>University<br>Australia | Récapet, Charlotte<br>Maître de conférence, Evolutionary Ecology<br>Université de Pau et des Pays de l'Adour<br>France                                                              | Rech, André Rodrigo<br>Professor Of Ecology and Evolution<br>Universidade Federal dos Vales do Jequitinhonha e<br>Mucuri<br>Brazil                                                                            |
| Recher, Harry<br>Emeritus Professor<br>Edith Cowan University<br>Australia                                                                                        | Redden, George<br>Environmental Science and Engineering<br>Retires, (Stanford University, Montana State University,<br>Idaho National Laboratory)<br>United States of America (the) | Reddy, Salona<br>Masters Candidate<br>University of KwaZulu-Natal<br>South Africa                                                                                                                             |
| REDON, Emilie<br>Ph.D. in Urban Climate<br>France                                                                                                                 | Redü, Darlan Rutz<br>PhD Student, Department of Zoology<br>University of São Paulo<br>Brazil                                                                                        | Reed, Colbie<br>Graduate Research Assistant, Microbial Ecology<br>The Pennsylvania State University<br>United States of America (the)                                                                         |
| Reemer, Menno<br>Entomologist, ecologist<br>Naturalis Biodiversity Center, Leiden<br>Netherlands (the)                                                            | Reepmeyer, Christian<br>Archaeology<br>James Cook University<br>Australia                                                                                                           | Rees, Erin<br>Biostatistician epidemiologist<br>Public Health Agency of Canada<br>Canada                                                                                                                      |
| Rees, William<br>Professor Emeritus (Human BioEcology and Planning)<br>University of British columbia<br>Canada                                                   | Regal, Philip<br>Biologist<br>University of Minnesota<br>United States of America (the)                                                                                             | Regina, Ariane *<br>Estudante de medicina<br>UNIFESP<br>Brazil                                                                                                                                                |
| Regnault, Thomas<br>Plant Scientist<br>Germany                                                                                                                    | Regner, Kurt<br>UNLV<br>United States of America (the)                                                                                                                              | Regnery, Baptiste<br>France                                                                                                                                                                                   |

\* indicates individual also signed 1992 Scientists' Warning to Humanity

|                                                                                                                                                                                           |                                                                                                                                              |                                                                                                                                               |
|-------------------------------------------------------------------------------------------------------------------------------------------------------------------------------------------|----------------------------------------------------------------------------------------------------------------------------------------------|-----------------------------------------------------------------------------------------------------------------------------------------------|
| Reguero, Martha<br>Curator of the Malacological Collection/Biologist<br>Universidad Nacional Autónoma de México. Instituto de Ciencias del Mar y Limnología<br>Mexico                     | Rehder, Zoé<br>Graduate Student in Climate Science<br>Germany                                                                                | Reichard, Ulrich<br>Professor of Anthropology<br>Southern Illinois University Carbondale<br>United States of America (the)                    |
| Reid, Anna-Mari<br>PhD Medicinal Plant Science<br>University of Pretoria<br>South Africa                                                                                                  | Reid, Chris<br>Research Fellow<br>Macquarie University<br>Australia                                                                          | Reid, Helen<br>Senior Geomorphologist<br>Scottish Environment Protection Agency<br>United Kingdom of Great Britain and Northern Ireland (the) |
| Reid, J. Leighton<br>Assistant Scientist of Restoration Ecology<br>Center for Conservation and Sustainable Development,<br>Missouri Botanical Garden<br>United States of America (the)    | Reid, Lee<br>Post-Doctoral Research Fellow. Medical Science<br>Australia                                                                     | Reider, Kelsey<br>Ecologist<br>Florida International University<br>United States of America (the)                                             |
| Reif, Raymond<br>Toxicology<br>Leibniz Research Centre for Working Environment and Human Factors<br>Germany                                                                               | Reijnders, Lucas<br>environmental science<br>University of Amsterdam<br>Netherlands (the)                                                    | Reil, J. Bradley<br>Entomology, PhD Student<br>University of Hawaii - Manoa<br>United States of America (the)                                 |
| Reimche, Jessica<br>Biology Graduate Student<br>Univeristy of Nevada Reno<br>United States of America (the)                                                                               | Reimer, James<br>Associate Professor<br>University of the Ryukyus<br>Japan                                                                   | Reinders, Simone<br>Graduate student, Cultural Anthropology<br>African Studies Centre<br>Netherlands (the)                                    |
| Reineman, Dan<br>Assistant Professor, Environmental Science & Resource Management<br>California State University Channel Islands<br>United States of America (the)                        | Reiners, Dirk<br>Associate Professor for Information Science<br>University of Arkansas at Little Rock<br>United States of America (the)      | Reiners, William<br>Professor of Botany Emeritus<br>University of Wyoming<br>Uruguay                                                          |
| REINERT, FERNANDA<br>Professor of PLANT PHYSIOLOGY (under-grad), physiology of photosynthesis (pos-grad)<br>UNIVERSIDADE FEDERAL DO RIO DE JANEIRO,<br>DEPARTAMENTO DE BOTÂNICA<br>Brazil | Reinhardt, Kathleen<br>Anthropology and Geography<br>Oxford Brookes University<br>United Kingdom of Great Britain and Northern Ireland (the) | reis, marise<br>sociology<br>free<br>Brazil                                                                                                   |
| Reis, Roberto<br>Professor of Zoology<br>Pontifical Catholic University of Rio Grande do Sul<br>Brazil                                                                                    | Reis, Tiago<br>Environmental policy researcher<br>Amazon Environmental Research Institute - IPAM<br>Brazil                                   | Reischig, Thomas<br>Scientific Director, Biology<br>Turtle Foundation<br>Germany                                                              |

|                                                                                                                                    |                                                                                                                                       |                                                                                                                                 |
|------------------------------------------------------------------------------------------------------------------------------------|---------------------------------------------------------------------------------------------------------------------------------------|---------------------------------------------------------------------------------------------------------------------------------|
| Reisman, Howard<br>ASIH<br>United States of America (the)                                                                          | Reiss, John<br>Professor of Zoology<br>Humboldt State University<br>United States of America (the)                                    | Reitalu, Triin<br>Researcher, palaeoecology<br>Tallinn University of Technology<br>Estonia                                      |
| Rejmanek, Marcel<br>Professor<br>University of California, Davis<br>United States of America (the)                                 | Réjou-Méchain, Maxime<br>Researcher in Ecology<br>IRD<br>France                                                                       | Rekker, Saphira<br>PhD Candidate<br>University of Queensland<br>Australia                                                       |
| Relic, Renata<br>University of Belgrade<br>Serbia                                                                                  | Rello-Varona, Santi<br>Research Assistant (Sarcoma Cell Biology)<br>IDIBELL<br>Spain                                                  | Remans, Kim<br>Head of the EMBL Protein Expression and Purification<br>Core Facility<br>EMBL Heidelberg<br>Germany              |
| Remm, Liina<br>Researcher, Conservation biology<br>Remm<br>Estonia                                                                 | Remsen, James<br>McIlhenny Distinguished Professor of Natural Science<br>Louisiana State University<br>United States of America (the) | Remy, Denise<br>Professor of Surgery and Ethics<br>VetAgro Sup<br>France                                                        |
| Ren, Ming<br>CO2 and air pollutants emission of industrial in China<br>China University of Mining and Technology, Beijing<br>China | Renán, Ximena<br>Associate Researcher<br>CINVESTAV-I.P.N.<br>Mexico                                                                   | Renart, Jaime<br>staff researcher<br>Consejo Superior de Investigaciones Cientificas<br>Spain                                   |
| Renaud, Paul<br>Senior Researcher<br>Akvaplan-niva<br>Norway                                                                       | Renaux, Alexandre<br>Bioinformatician<br>EMBL-EBI<br>United Kingdom of Great Britain and Northern Ireland<br>(the)                    | Rendell, Luke<br>Reader in Biology<br>University of St Andrews<br>United Kingdom of Great Britain and Northern Ireland<br>(the) |
| Rendell-Bhatti, Flora<br>BSc Zoology<br>University of Exeter<br>United Kingdom of Great Britain and Northern Ireland<br>(the)      | RENE DE ROLAND, LILY-ARISON<br>NATIONAL DIRECTOR<br>THE PEREGRINE FUND<br>Madagascar                                                  | Reneerkens, Jeroen<br>postdoc Animal Ecology<br>University of Groningen<br>Netherlands (the)                                    |
| Renema, Willem<br>research groupleader Marine Biodiversity<br>Naturalis Biodiversity Center<br>Netherlands (the)                   | Reyes, Sophia<br>Ecology PhD student<br>Swedish Agricultural University<br>Sweden                                                     | Renfrew, Daniel<br>Associate Professor of Anthropology<br>West Virginia University<br>United States of America (the)            |

|                                                                                                                                     |                                                                                                                                                      |                                                                                                                                                                              |
|-------------------------------------------------------------------------------------------------------------------------------------|------------------------------------------------------------------------------------------------------------------------------------------------------|------------------------------------------------------------------------------------------------------------------------------------------------------------------------------|
| Renganathan, Jayakumar<br>Guest Scientist<br>Leibniz INstitute of Fresh Water Ecology and Inland Fisheries<br>Germany               | Renirie, Rokus<br>Independent Consultant Sustainable (Bio)Chemistry<br>Netherlands (the)                                                             | Renken, Henk<br>Marine Ecologist - Oil Spill Preparedness and Response BP<br>United Kingdom of Great Britain and Northern Ireland (the)                                      |
| Renoult, Julien<br>Researcher<br>CNRS<br>France                                                                                     | Rentz AM, David<br>Adjunct Professor, School of Marine and Biological Sciences<br>James Cook university<br>Australia                                 | Repetto, Rafael<br>zoologist<br>unoccupied<br>Italy                                                                                                                          |
| Reppucci, Juan<br>Doctor in Biology<br>CONICET<br>Argentina                                                                         | Requena, Susana<br>Conservation Scientist<br>Royal Society for the Protection of Birds<br>United Kingdom of Great Britain and Northern Ireland (the) | Requena Suarez, Daniela<br>PhD Candidate<br>Wageningen University & Research<br>Peru                                                                                         |
| Reques, Ricardo<br>Professor of Ecology<br>Ecology Department. Science Faculty of the University of Córdoba<br>Spain                | Requier, Fabrice<br>Post-doctoral Research Associate<br>Universidad Nacional de Río Negro (UNRN), Sede Andina<br>Argentina                           | Resa Jurin, Lucas *<br>biologist<br>Universidad Nacional de Cuyo<br>Argentina                                                                                                |
| Resende, Angelica<br>P.h.D Candidate in Botany<br>National Institute of Amazonian Research<br>Brazil                                | Resende, Fernando<br>PhD student/Ecology<br>Federal University of Goiás<br>Brazil                                                                    | Resh, Sigrid<br>Research Asst. Professor--Forest Ecologist and Invasive Species Education and Control<br>Michigan Technological University<br>United States of America (the) |
| Reski, Ralf<br>Distinguished Professor Plant Biotechnology<br>University of Freiburg<br>Germany                                     | Resler, Lynn<br>Associate Professor<br>Virginia Tech<br>United States of America (the)                                                               | Rétaux, Sylvie<br>Director of Research<br>Centre National de la Recherche Scientifique<br>France                                                                             |
| Retel, Cas<br>PhD Student in Ecology and Evolution<br>University of Bern / Swiss Institute for Aquatic Science<br>Netherlands (the) | Retief, Ernst<br>Conservation Manager<br>BirdLife South Africa<br>South Africa                                                                       | Reuscher, Michael<br>Postdoctoral Research Associate in Marine Biology<br>Texas A&M University-Corpus Christi<br>United States of America (the)                              |
| Reussien, Naomi<br>Master Ecology student<br>VU<br>Netherlands (the)                                                                | Reuter, Hauke<br>Marine Biologist<br>Leibniz Centre for Tropical Marine Research (ZMT)<br>Germany                                                    | Reuter, Hendrik<br>PhD student<br>Leibniz-institute of Freshwater Ecology and Inland Fisheries<br>Germany                                                                    |

|                                                                                              |                                                                                                                                                         |                                                                                                                                                                           |
|----------------------------------------------------------------------------------------------|---------------------------------------------------------------------------------------------------------------------------------------------------------|---------------------------------------------------------------------------------------------------------------------------------------------------------------------------|
| Revers, Frederic<br>Researcher<br>INRA<br>France                                             | Reverté, Sara<br>PhD student in Ecology<br>CREAF, Center of Ecological Research and Forestry<br>Applications<br>Spain                                   | Revilla, Eloy<br>Research Scientist<br>Estación Biológica de Doñana, CSIC<br>Spain                                                                                        |
| Revillion, Jean Philippe<br>Professor<br>Universidade Federal do Rio Grande do Sul<br>Brazil | Rey Castellanos, Eddy Rocio<br>Full Time Professor, Chemist<br>Universidad Laica Eloy Alfaro de Manabi<br>Ecuador                                       | Reyes, Jhoe<br>Invertebrate Taxonomist, Laboratorio de Zoología de<br>Invertebrados, Facultad de Ciencias Biológicas.<br>Universidad Nacional Mayor de San Marcos<br>Peru |
| Reyes, Rene<br>Researcher - Forest economy<br>Instituto Forestal<br>Chile                    | Reyes Gómez, Víctor Manuel<br>Hidroecología en Zonas Áridas<br>INECOL<br>Mexico                                                                         | Reynaud, Philippe<br>Entomologist<br>ANSES<br>France                                                                                                                      |
| Reynolds, Florence<br>Human Geography<br>New Zealand                                         | Reynolds, John<br>Professor of Aquatic Ecology<br>Simon Fraser University<br>Canada                                                                     | Reynolds, Lindsay<br>Ecologist<br>US Forest Service<br>United States of America (the)                                                                                     |
| Reynolds, Samantha<br>Marine Biologist and Research Scientist<br>ECOCEAN Inc.<br>Australia   | Reynolds, Vernon<br>Professor Emeritus<br>Oxford University<br>United Kingdom of Great Britain and Northern Ireland<br>(the)                            | Reynoso, Claudia<br>Conservation Biologist<br>University of Arizona<br>United States of America (the)                                                                     |
| Rezaei, Arsalan<br>Iran (Islamic Republic of)                                                | Rezende, Enrico<br>Associate Professor in Ecology and Evolution<br>Universidad Andres Bello<br>Chile                                                    | Rezende, Renan<br>Professor of Ecology<br>Universidade Federal Rural do Semiárido<br>Brazil                                                                               |
| Rguez-Baron, Juan M.<br>Scientific Director<br>JUSTSEA Fountation<br>Colombia                | Rhodes, Amanda<br>Master of Public Policy, Registered Dietitian Nutritionist<br>Oregon State University<br>United States of America (the)               | Rhodes, Ciera<br>Graduate Research Assistant<br>Mississippi State University<br>United States of America (the)                                                            |
| Rhodes, Jonathan<br>Hydrologist<br>Planeto Azul Hydrology<br>United States of America (the)  | Rhodes, Susan<br>Teacher, IB Environmental Systems and Societies Senior<br>Examiner/Moderator<br>AISM (American Int'l Sch Mozambique & IB<br>Mozambique | rial, anabel<br>Biologist - PhD<br>IUCN SSC Freshwater Plant Specialist Group<br>Venezuela (Bolivarian Republic of)                                                       |

|                                                                                                                                                             |                                                                                                                                                                                                       |                                                                                                                             |
|-------------------------------------------------------------------------------------------------------------------------------------------------------------|-------------------------------------------------------------------------------------------------------------------------------------------------------------------------------------------------------|-----------------------------------------------------------------------------------------------------------------------------|
| Ribas, Luiz Guilherme dos Santos<br>Phd student of Ecology and Evolution<br>Universidade Federal de Góias<br>Brazil                                         | Ribault, Emilie<br>Doctor of Veterinary Medicine, Master of Science in<br>Conservation Biology<br>Vetagro-Sup, National Veterinary School of Lyon and<br>Manchester Metropolitan University<br>France | Ribbing, Per<br>PhD student, Division of Electricity, Department of<br>Engineering Sciences<br>Uppsala university<br>Sweden |
| Ribeca, Paolo<br>Head of Integrative Biology and Bioinformatics<br>The Pirbright Institute<br>United Kingdom of Great Britain and Northern Ireland<br>(the) | Ribeiro, Antonio J M<br>Postdoctoral Fellow<br>EMBL-EBI<br>United Kingdom of Great Britain and Northern Ireland<br>(the)                                                                              | Ribeiro, Bruno<br>PhD student<br>Universidade Federal de Goiás<br>Brazil                                                    |
| Ribeiro, Eduardo Augusto Werneck<br>Geography Professor<br>Catarinense Federal Institute - IFC<br>Brazil                                                    | Ribeiro, Guilherme<br>Professor of Epidemiology<br>Institute of Collective Health<br>Brazil                                                                                                           | Ribeiro, Rannyele<br>PhD student<br>Universidad Autónoma de Madrid<br>Spain                                                 |
| Ribeiro, Rui<br>Associate Professor with Tenure/Agregação<br>University of Coimbra<br>Portugal                                                              | Ribeiro, Wagner<br>Full professor<br>Univesity of Sao Paulo<br>Brazil                                                                                                                                 | Ribeiro-costa, Cibele<br>Brazil                                                                                             |
| Ribeiro-Neto, José Domingos<br>Professor of plant ecology<br>Federal Uni efeito of Paraíba - Brasil<br>Brazil                                               | Ricalde, David G.<br>Conservation biologist<br>Peru                                                                                                                                                   | Ricaud, Charlotte<br>consultant<br>France                                                                                   |
| Rice, Marc<br>Director, HPA Sea Turtle Research Program<br>Hawaii Preparatory Academy<br>United States of America (the)                                     | Rice-Herdt, Jasper<br>Civil Engineer<br>Rice-Herdt<br>United States of America (the)                                                                                                                  | Rich, Anina<br>Associate Professor<br>Macquarie University<br>Australia                                                     |
| Rich, Bob<br>Counseling Psychologist<br>Retired<br>Australia                                                                                                | Richard, Agnes<br>Centre for Tropical Marine Research<br>Germany                                                                                                                                      | Richard, Gaetan<br>PhD Student<br>CEBC<br>France                                                                            |
| RICHARD, Pierre<br>CNRS Emeritus Research Director, Ecology<br>CNRS / University of La Rochelle<br>France                                                   | Richard, Romain<br>postdoctoral researcher<br>University of Amsterdam<br>Netherlands (the)                                                                                                            | Richards, Josh<br>Applied Physicist<br>Australia                                                                            |
| Richards, Zoe<br>Research Fellow/Marine Science<br>Curtin University<br>Australia                                                                           | Richardson, Anthony<br>Professor, Mathematical Biology<br>University of Queensland, and CSIRO<br>Australia                                                                                            | Richardson, Barbara<br>Associate researcher<br>University of Puerto Rico<br>United States of America (the)                  |

|                                                                                                                                                  |                                                                                                                                      |                                                                                                                          |
|--------------------------------------------------------------------------------------------------------------------------------------------------|--------------------------------------------------------------------------------------------------------------------------------------|--------------------------------------------------------------------------------------------------------------------------|
| Richardson, Leif<br>Postdoctoral Research Associate<br>University of Vermont<br>United States of America (the)                                   | Richardson, Sarah<br>Ecologist<br>Manaaki Whenua<br>New Zealand                                                                      | Richardson, Vanessa A<br>Brazil                                                                                          |
| Richardt, Denise<br>Pharmacologist<br>Denise Richardt Consulting/University of the<br>Witwatersrand<br>South Africa                              | Richardson, Sarah<br>PhD student - Zoology<br>University of Bristol<br>United Kingdom of Great Britain and Northern Ireland<br>(the) | Richerol, Thomas<br>Postdoctoral Fellow<br>UQAR-ISMER<br>Canada                                                          |
| Richmond, Robert<br>Research Professor and Director<br>Kewalo Marine Laboratory, University of Hawaii at Manoa<br>United States of America (the) | RICHOMME, Céline<br>Research project manager<br>Anses, Nancy laboratory for rabies and wildlife<br>France                            | Richter, Birgit<br>Professor of Mathematics<br>University of Hamburg<br>Germany                                          |
| Richter, Stephen<br>United States of America (the)                                                                                               | Richter-Boix, Alex<br>Evolutionary Ecology<br>University of Barcelona<br>Spain                                                       | Rickert, Corinna<br>Environmental Scientist, PhD<br>Germany                                                              |
| Rico, Eugenio<br>University professor and researcher. Ecology<br>Universidad Autónoma de Madrid<br>Spain                                         | Rico, Yessica<br>Researcher<br>CONACYT, Instituto de Ecología, A.C<br>Mexico                                                         | Rico-Chávez, Oscar<br>Diseases Ecology<br>Facultad de Medicina Veterinaria y Zootecnia, UNAM<br>Mexico                   |
| Riddle, Brett<br>Professor<br>University of Nevada Las Vegas<br>United States of America (the)                                                   | Ridenti, Marcelo<br>Full Professor - Sociology<br>Universidade Estadual de Campinas - Unicamp<br>Brazil                              | Ridley, Amanda<br>Senior lecturer, Behavioural Ecology<br>University of Western Australia<br>Australia                   |
| ridou, loick<br>Ingenieur assistant<br>CNRS<br>France                                                                                            | Riechmann, Jorge<br>Moral Philosophy & Mathematics<br>Universidad Autonoma de Madrid<br>Spain                                        | Riede, Felix<br>Associate Professor of Geoarchaeology<br>Aarhus University<br>Denmark                                    |
| Riede, Moritz<br>Physics<br>University of Oxford/Global Young Academy<br>United Kingdom of Great Britain and Northern Ireland<br>(the)           | Riedel, Alexander<br>entomologist<br>State Museum of Natural History Karlsruhe<br>Germany                                            | Riedel, Jendrian<br>PhD student in Biology (Comparative Morphology of<br>Reptiles)<br>James Cook University<br>Australia |
| Riehl, Emily<br>Assistant Professor, Department of Mathematics<br>Johns Hopkins University<br>United States of America (the)                     | Riehl, Jennifer<br>Population Geneticist<br>University of Wisconsin-Madison<br>United States of America (the)                        | Riel-Salvatore, Julien<br>Associate Professor, Anthropology (Archaeology)<br>Université de Montréal<br>Canada            |

|                                                                                                                                                   |                                                                                                                                                    |                                                                                                                                                                        |
|---------------------------------------------------------------------------------------------------------------------------------------------------|----------------------------------------------------------------------------------------------------------------------------------------------------|------------------------------------------------------------------------------------------------------------------------------------------------------------------------|
| Riente, Luana<br>environmental management<br>Universidade Federal Rural do Rio de Janeiro<br>Brazil                                               | Ries, Jonas<br>Group leader<br>EMBL<br>Germany                                                                                                     | Rifai MD FACP, Dr Tom<br>President<br>Reality Meets Science LLC<br>United States of America (the)                                                                      |
| Riffel, Eduardo Samuel *<br>Doutorando em Geografia<br>Universidade Federal do Rio Grande do Sul UFRGS<br>Brazil                                  | Rifkin, Riaan<br>Evolutionary Anthropolgy<br>University of Pretoria<br>South Africa                                                                | Rigaud, Thierry *<br>Directeur de Recherche<br>CNRS<br>France                                                                                                          |
| Rigby, Catherine<br>Professor of Environmental Humanities<br>Bath Spa University<br>United Kingdom of Great Britain and Northern Ireland<br>(the) | Rigg, Robin<br>zoologist<br>Slovak Wildlife Society<br>Slovakia                                                                                    | Righetti, Antonio<br>senior expert natur conservation ans landscape<br>B+S AG<br>Switzerland                                                                           |
| Righini, Nicoletta<br>Postdoctoral Researcher<br>IIES - UNAM<br>Mexico                                                                            | Riina, Ricarda *<br>Botanist<br>Real Jardin Botanico CSIC<br>Spain                                                                                 | Rijsdijk, Kenneth<br>Assistant Professor Physical (Bio)Geography<br>Institute for Biodiversity and Ecosystem Dynamics,<br>University of Amsterdam<br>Netherlands (the) |
| Riley, Christopher<br>Graduate Research Fellow<br>The Ohio State University<br>United States of America (the)                                     | Rilov, Gil<br>Senior Scientist, Marine Ecologist<br>Israel Oceanographic and Limnological Research (IOLR)<br>Israel                                | Rimmer, Chris<br>Executive Director<br>Vermont Center for Ecostudies<br>United States of America (the)                                                                 |
| Rinaldi Colli, Guarino<br>Associate Professor<br>Universidade de Brasília<br>Brazil                                                               | RINALDO, RAPHAELLE<br>Science and Research Coordinator<br>French Guiana Amazonian Park<br>French Guiana                                            | Rinas, Christina<br>PhD Student<br>University of Sherbrooke<br>Canada                                                                                                  |
| Ringeisen, Damien<br>PhD Student , Sea Ice Modeling<br>Alfred Wegener Institute, Helmholtz Center of Marine<br>and Polar Research<br>Germany      | Ringler, Max<br>Visiting Post-Doctoral Researcher - Behavioural Ecology<br>University of California, Los Angeles<br>United States of America (the) | Rinnan, D. Scott<br>Quantitative Ecology and Resource Management<br>University of Washington<br>United States of America (the)                                         |
| Rintala, Danielle<br>Biological Safety Officer<br>University of Wisconsin-Milwaukee<br>United States of America (the)                             | Rios, Sergio D.<br>Paleontology<br>Secretaría Nacional de Cultura<br>Paraguay                                                                      | Ríos, Carlos<br>Universidad de Magallanes<br>Chile                                                                                                                     |
| Rios-Touma, Blanca<br>Full Professor<br>Universidad de Las Américas, Quito-Ecuador<br>Ecuador                                                     | Ripandelli, Simone<br>Thermodynamics<br>Italy                                                                                                      | Risely, Alice<br>Ecologist<br>Deakin University<br>Australia                                                                                                           |



|                                                                                                                                                                                                         |                                                                                                                            |                                                                                                            |
|---------------------------------------------------------------------------------------------------------------------------------------------------------------------------------------------------------|----------------------------------------------------------------------------------------------------------------------------|------------------------------------------------------------------------------------------------------------|
| Ristow, Paula<br>Assistant Professor in Microbiology, Cell Biology and Molecular Biology<br>Federal University of Bahia<br>Brazil                                                                       | Rita, Juan<br>Associate Professor of Botany<br>Universitat de les Illes Balears<br>Spain                                   | Ritchie, Euan<br>Senior Lecturer in Ecology<br>Deakin University<br>Australia                              |
| Rito, Kátia F.<br>Postdoctoral researcher / Community and Landscape Ecology<br>Instituto de Investigaciones en Ecosistemas y Sustentabilidad - Universidad Nacional Autónoma de México (UNAM)<br>Mexico | Ritter, Camila<br>PhD student at department of Biological and Environmental Sciences<br>University of Gothenburg<br>Brazil | Ritter, Camila<br>PhD student<br>University of Gothenburg<br>Sweden                                        |
| Ritter, Fabian<br>Director of Research (Biology)<br>M.E.E.R. e.V.<br>Germany                                                                                                                            | Rittgerott, Mathias *<br>Geographer<br>Rainforest Rescue<br>Germany                                                        | Riva Tonini, João Filipe<br>Post-Doctoral Fellow<br>Harvard University<br>Brazil                           |
| Rivarola, Maria Daniela<br>PhD student<br>University of Tennessee<br>United States of America (the)                                                                                                     | Rivas-Torres, Gonzalo<br>Full time Professor and Researcher<br>Universidad San Francisco de Quito<br>Ecuador               | Rivera, María<br>Research Assistant<br>Instituto de Ciências Agrárias e Ambientais Mediterrânicas<br>Spain |
| Rivera, Rebeca<br>Conservation biology<br>University of Nevada, Las Vegas<br>United States of America (the)                                                                                             | Rivera-Correa, Mauricio<br>Professor<br>Universidad de Antioquia<br>Colombia                                               | Rivera-Ferre, Marta<br>Director<br>Chair Agroecology and Food Systems- University of Vic<br>Spain          |
| Rivero Vega, Rafael A.<br>Graduate Student Biological Sciences<br>Universidad de Puerto Rico - Recinto de Rio Piedras<br>Puerto Rico                                                                    | Rivington, Mike<br>Scientist<br>The James Hutton Institute<br>United Kingdom of Great Britain and Northern Ireland (the)   | Rizzato, Pedro<br>PhD Student - Comparative Biology<br>FFCLRP-Universidade de São Paulo<br>Brazil          |
| Rizzo, Alexandra<br>professor<br>UERJ<br>Brazil                                                                                                                                                         | Rizzo, Anacleto<br>PhD - Researcher and Environmental engineer<br>IRIDRA Srl<br>Italy                                      | Rizzo, Luciana<br>Professor<br>Universidade Federal de Sao Paulo<br>Brazil                                 |
| Rizzuto, Matteo<br>PhD Student, Ecosystem Ecology<br>Memorial University of Newfoundland<br>Canada                                                                                                      | Roach, Nicolette<br>PhD Student<br>Texas A&M University<br>United States of America (the)                                  | Roa-Fuentes, Camilo A.<br>Freshwater ecologist<br>Independent<br>Colombia                                  |

|                                                                                                                                                                         |                                                                                                                                                                                          |                                                                                                                               |
|-------------------------------------------------------------------------------------------------------------------------------------------------------------------------|------------------------------------------------------------------------------------------------------------------------------------------------------------------------------------------|-------------------------------------------------------------------------------------------------------------------------------|
| Roast, Michael J.<br>PhD Candidate<br>Monash University<br>Australia                                                                                                    | Robards, Martin<br>Regional Director, Arctic Beringia Program<br>Wildlife Conservation Society<br>United States of America (the)                                                         | Robbins, Robert<br>Carnivore Biology<br>African Wild Dog Conservancy<br>United States of America (the)                        |
| Robeck, Philipp<br>Env. Planner<br>Melbourne<br>Australia                                                                                                               | Robeck, Philipp<br>Australia                                                                                                                                                             | Roberson, Christine<br>continuing medical education<br>UnityPoint Health-Meriter<br>United States of America (the)            |
| Roberson, Leslie<br>PhD Student, Biological Sciences<br>University of Queensland<br>Australia                                                                           | Robert, Alexandre<br>Associate Professor<br>Museum National d'Histoire Naturelle<br>France                                                                                               | Robert, Wick<br>Professor Plant Pathology and Nematology<br>University of Massachusetts<br>United States of America (the)     |
| Roberts, Callum<br>Professor of Marine Conservation<br>University of York<br>United Kingdom of Great Britain and Northern Ireland (the)                                 | Roberts, David<br>Reader in Biodiversity & Conservation<br>Durrell Institute of Conservation & Ecology, University of Kent<br>United Kingdom of Great Britain and Northern Ireland (the) | Roberts, Dina<br>Resident Lecturer<br>School for Field Studies<br>Bhutan                                                      |
| Roberts, Emyr Martyn<br>Researcher - Physical Oceanography and Marine Ecology<br>Bangor University, Wales<br>United Kingdom of Great Britain and Northern Ireland (the) | Roberts, Jennifer<br>Impact Manager<br>WWF<br>Cambodia                                                                                                                                   | Roberts, Lance<br>Ecologist<br>Point Blue Conservation Science<br>United States of America (the)                              |
| Robertson, Barry<br>Ecologist<br>Scottish Environment Protection Agency<br>United Kingdom of Great Britain and Northern Ireland (the)                                   | Robertson, Iain<br>Reader (Associate Professor) - Geography<br>Swansea University<br>United Kingdom of Great Britain and Northern Ireland (the)                                          | Roberty, Stephane<br>Coral reef biology<br>University of Liege<br>Belgium                                                     |
| Robidoux, Serje<br>Cognitive Science and Statistics<br>Macquarie University<br>Australia                                                                                | Robijn, Ardo<br>PhD student<br>Department of Marine Science, Gothenburg University<br>Sweden                                                                                             | Robillard, Tony<br>Associate professor<br>Muséum national d'Histoire naturelle, Paris<br>France                               |
| ROBIN, Jean-Patrice<br>Senior Researcher CNRS / BIOLOGIE<br>CNRS<br>France                                                                                              | Robins, Colin<br>Assistant Professor of Environmental Science<br>Claremont McKenna, Pitzer, and Scripps Colleges<br>United States of America (the)                                       | Robins, Robert<br>Ichthyologist<br>Florida Museum of Natural History, University of Florida<br>United States of America (the) |

|                                                                                                                                           |                                                                                                                                                                                       |                                                                                                                                         |
|-------------------------------------------------------------------------------------------------------------------------------------------|---------------------------------------------------------------------------------------------------------------------------------------------------------------------------------------|-----------------------------------------------------------------------------------------------------------------------------------------|
| Robinson, Connor<br>Masters Student<br>University of British Columbia<br>Canada                                                           | Robinson, James<br>Senior Research Associate, marine ecology<br>Lancaster University<br>United Kingdom of Great Britain and Northern Ireland<br>(the)                                 | Robinson, John<br>Executive Vice President, Conservation and Science<br>Wildlife Conservation Society<br>United States of America (the) |
| Robinson, Natasha<br>Research Fellow<br>The Australian National University<br>Australia                                                   | Robinson, Simon<br>Computer Science<br>Swansea University<br>United Kingdom of Great Britain and Northern Ireland<br>(the)                                                            | Robinson, Willard<br>Biologist<br>Casper College<br>United States of America (the)                                                      |
| Robise, Aurélie<br>Biologist<br>Belgium                                                                                                   | Robison, Laura<br>Restoration Ecologist<br>United States of America (the)                                                                                                             | Robledano-Aymerich, Francisco<br>Biologist<br>University of Murcia<br>Spain                                                             |
| Robledo-Arnuncio, Juan J.<br>Senior researcher<br>National Institute for Agricultural and Food Research and<br>Technology (INIA)<br>Spain | Robson, Belinda<br>Associate Professor, Environmental Science<br>Murdoch University<br>Australia                                                                                      | Robson, Diana<br>Curator of Botany<br>Manitoba Museum<br>Canada                                                                         |
| Robson, Lucy<br>Doctor, GP<br>DOT Medical<br>Australia                                                                                    | Robson, Simon<br>Zoology & Ecology<br>James Cook University<br>Australia                                                                                                              | ROCAMORA, Gérard<br>Scientific Director & Chair, Island Biodiversity &<br>Conservation center<br>University of Seychelles<br>Seychelles |
| Roces-Díaz, Jose V.<br>Postdoctoral researcher<br>Agroscope<br>Switzerland                                                                | Rocha, Afonso Duarte<br>Ecology<br>MARE — Marine and Environmental Research Centre,<br>Department of Life Sciences, University of Coimbra, 3000-<br>456 Coimbra, Portugal<br>Portugal | Rocha, Carlos Frederico Duarte<br>Associate Professor<br>Universidade do estado do Rio de Janeiro<br>Brazil                             |
| Rocha, Renata Menezes<br>Biologist<br>Brazil                                                                                              | Rocha, Ricardo<br>Post-doctoral Research Associate, Conservation Biology<br>University of Cambridge<br>Portugal                                                                       | Rocha, Sara<br>Postdoc researcher, biologist<br>University of vigo, Spain<br>Spain                                                      |
| Rocha, Sergio<br>Professor of Zoology<br>Universidade Federal do Recôncavo da Bahia<br>Brazil                                             | Rocha, Tainá<br>PhD research<br>Universidade Federal do Rio de Janeiro<br>Brazil                                                                                                      | Rocha Dantas, Adelson<br>PhD Student<br>Instituto Nacional de Pesquisas da Amazônia<br>Brazil                                           |

|                                                                                                            |                                                                                                                                                                |                                                                                                                                                     |
|------------------------------------------------------------------------------------------------------------|----------------------------------------------------------------------------------------------------------------------------------------------------------------|-----------------------------------------------------------------------------------------------------------------------------------------------------|
| Rocha dos Santos, Pedro henrique<br>Biology student<br>Unifesp<br>Brazil                                   | Rocheleau, Jean-Philippe<br>DVM, PhD, Groupe de recherche en épidémiologie des<br>zoonoses et santé publique<br>Université de Montréal<br>Canada               | Rocher-Ros, Gerard<br>Researcher in biogeochemistry<br>Climate Impacts Research Centre, Umeå university<br>Sweden                                   |
| Rochman, Chelsea<br>Assistant Professor in Ecology<br>University of Toronto<br>Canada                      | Rocks, Jennifer<br>Psychologist<br>United States of America (the)                                                                                              | Rockwood, R. Cotton<br>Marine Ecologist<br>United States of America (the)                                                                           |
| Rodda, Gordon<br>Emeritus Zoologist<br>US Geological Survey<br>United States of America (the)              | Rodda, Michele<br>Singapore                                                                                                                                    | Rödder, Dennis<br>Curator Herpetology<br>Germany                                                                                                    |
| Rodehacke, Christian<br>Scientist<br>Alfred Wegener Institute for Polar and Marine Research<br>Germany     | Rödel, Mark-Oliver<br>Researcher; Ecology<br>Museum für Naturkunde, Berlin<br>Germany                                                                          | Ródenas, Mila<br>Researcher<br>Fundación CEAM<br>Spain                                                                                              |
| Roder, Stefanie<br>Master Student<br>Institute of Ecology and Evolution, University of Bern<br>Switzerland | Rodgers, Kuulei<br>Coral Reef Ecology Researcher<br>University of Hawaii, Hawaii Institute of Marine Biology<br>United States of America (the)                 | RODOTHEATOS, GERASIMOS<br>RESEARCHER WITH THE EUROPEAN CENTRE FOR<br>ENVIRONMENTAL RESEARCH AND TRAINING<br>PANTEION UNIVERSITY OF ATHENS<br>Greece |
| Rodrigo, Anselm<br>Professor/ Ecology<br>Univerity Autonomous of Barcelona and CREAM<br>Spain              | Rodrigo, Gloria<br>Teaching researcher/Genotoxicology and Molecular and<br>cell biology<br>Universidad Mayor de San Andres<br>Bolivia (Plurinational State of) | Rodrigo, Isabel<br>Agronomy/Rural Sociology<br>Instituto Superior de Agronomia/Technical University of<br>Lisbon<br>Portugal                        |
| Rodrigue, Sebastien<br>Associate professor<br>Universite de Sherbrooke<br>Canada                           | Rodrigues, Aida<br>PhD Candidate<br>Deakin University<br>Australia                                                                                             | RODRIGUES, CLAUDIO *<br>research public health<br>Oswaldo Cruz Foundation (FIOCRUZ)<br>Brazil                                                       |
| RODRIGUES, Ebenezer<br>PhD Ecology and Conservation<br>Universidade de Uberlândia<br>Brazil                | RODRIGUES, ELIANA<br>UNIFESP<br>Brazil                                                                                                                         | Rodrigues, Evelina<br>Biologist<br>ISPA<br>Portugal                                                                                                 |

|                                                                                                                                                                   |                                                                                                                                                                                                                                                                                             |                                                                                                                          |
|-------------------------------------------------------------------------------------------------------------------------------------------------------------------|---------------------------------------------------------------------------------------------------------------------------------------------------------------------------------------------------------------------------------------------------------------------------------------------|--------------------------------------------------------------------------------------------------------------------------|
| Rodrigues, Juliana<br>Graduate in Ecology<br>Universidade estadual paulista "Júlio de Mesquita Filho"<br>Brazil                                                   | Rodrigues, Luciano *<br>University professor and researcher (Organic chemistry<br>and analytical chemistry - biosensors<br>Institute of Engineering, Science and Technology, Federal<br>University of Jequitinhonha and Mucuri's Valleys, Av.<br>Manoel Bandeira 460 - Janaúba-MG<br>Brazil | Rodrigues, Marciel<br>Professor<br>Universidade Estadual de Santa Cruz<br>Brazil                                         |
| Rodrigues, Ricardo<br>Professor Titular<br>universidade de São Paulo- ESALQ<br>Brazil                                                                             | Rodrigues, Ricardo Ribeiro *<br>Universidade de São Paulo<br>Brazil                                                                                                                                                                                                                         | Rodrigues, Taissa<br>Universidade Federal do Espírito Santo<br>Brazil                                                    |
| Rodrigues da Silva, Rafaela<br>Master of Science<br>NEPSSA - Universidade Federal de São Paulo<br>Brazil                                                          | rodrigues filho, guimes<br>Professor Titular<br>Federal University of Uberlândia<br>Brazil                                                                                                                                                                                                  | Rodrigues Gomes, Felipe Bittioli<br>Professor<br>Universidade Federal do Pará<br>Brazil                                  |
| Rodrigues Meireles, Catarina Isabel<br>Botanist<br>University of Évora<br>Portugal                                                                                | Rodrigues Pinheiro, Lívia<br>Zoology<br>Universidade Federal de São Carlos<br>Brazil                                                                                                                                                                                                        | Rodrigues Santos, Yago<br>Master's Degree Student in Ecology<br>INPA - National Institute of Amazon Researches<br>Brazil |
| Rodrigues Vieira, Cecilia<br>PhD student<br>Utah State University<br>United States of America (the)                                                               | Rodrigues Vieira, Cecília<br>PhD student<br>Utah State University<br>United States of America (the)                                                                                                                                                                                         | Rodriguez, Airam<br>Biological Researcher<br>Estacion Biologica de Doñana CSIC<br>Spain                                  |
| Rodriguez, Donald<br>Professor, Environmental Science and Resource<br>Management<br>California State University Channel Islands<br>United States of America (the) | Rodriguez, Javier<br>Associate Professor / Life Sciences<br>University of Nevada, Las Vegas<br>United States of America (the)                                                                                                                                                               | Rodriguez, Juan J<br>Professor of Chemical Engineering<br>Univerdidad Autonoma de Madrid<br>Spain                        |
| Rodriguez, Lily<br>President<br>CIMA-Cordillera Azul<br>Peru                                                                                                      | Rodriguez, Marta<br>Spain                                                                                                                                                                                                                                                                   | Rodriguez, Pilar<br>Professor of Zoology<br>University of the Basque Country<br>Spain                                    |
| Rodríguez, Alejandro<br>Research scientist<br>Estación Biológica de Doñana - CSIC<br>Spain                                                                        | Rodríguez, Alexandra<br>Postdoctoral fellow/Biogeochemistry<br>Center for Functional Ecology-University of Coimbra<br>Portugal                                                                                                                                                              | Rodríguez, Asun<br>PhD student<br>Spain                                                                                  |
| Rodríguez, Jesus<br>Researcher/Curator- Palaeoecology<br>Centro Nacional de Investigación de la Evolución Humana<br>Spain                                         | Rodríguez, Jonatan *<br>Plant Ecology<br>University of Vigo<br>Spain                                                                                                                                                                                                                        | Rodríguez, Sara M<br>Researcher<br>Universidad Austral de Chile<br>Chile                                                 |

|                                                                                                                          |                                                                                                                                                                          |                                                                                                                                                        |
|--------------------------------------------------------------------------------------------------------------------------|--------------------------------------------------------------------------------------------------------------------------------------------------------------------------|--------------------------------------------------------------------------------------------------------------------------------------------------------|
| Rodríguez Castro, Ma. Carolina<br>PhD<br>INEDES - (UNLu, CONICET)<br>Argentina                                           | Rodriguez Padilla, Victor<br>Energy<br>Universidad Nacional Autonoma de Mexico<br>Mexico                                                                                 | Rodriguez Ramilo, Silvia Teresa<br>Research Geneticist<br>INRA<br>France                                                                               |
| Rodriguez Ranero, Cesar<br>Research Professor<br>ICREA at CSIC<br>Spain                                                  | Rodriguez Rocha, Manuel<br>Research and monitoring<br>Parques Nacionales Naturales de Colombia<br>Colombia                                                               | Rodriguez Rodriguez, Maria Candelaria<br>Postdoctoral researcher<br>Freelance<br>Spain                                                                 |
| Rodríguez Vázquez, Raquel<br>PhD student<br>University of Santiago de Compostela<br>Spain                                | Rodríguez Villalobos, Jenny Carolina<br>Postdoctoral fellow, Coral reef ecology<br>Universidad Autónoma de Baja California Sur<br>Mexico                                 | Rodriguez-Cardona, Bianca<br>PhD Student in aquatic biogeochemistry<br>University of New Hampshire<br>United States of America (the)                   |
| Rodriguez-Clark, Kathryn<br>Investigadora Asociada/Associate Researcher<br>Provita<br>Venezuela (Bolivarian Republic of) | Rodríguez-Echeverría, Susana<br>Research in Ecology<br>University of Coimbra<br>Portugal                                                                                 | Rodríguez-Estrella, Ricardo<br>Professor, Ecology and Conservation<br>Centro de Investigaciones Biologicas del Noroeste<br>Mexico                      |
| Rodriguez-Girones, Miguel Angel<br>Ecology<br>Spanish National Research Council (CSIC)<br>Spain                          | Rodríguez-Labajos, Beatriz<br>Ecological economist<br>Institute of Environmental Science and Technology<br>(ICTA), Universitat Autònoma de Barcelona (UAB)<br>Spain      | Rodríguez-Lozano, Pablo<br>Postdoctoral Researcher<br>University of California, Berkeley<br>United States of America (the)                             |
| Rodríguez-Martínez, Rosa Elisa<br>Academic / Coral Reef Ecology<br>Universidad Nacional Autónoma de México<br>Mexico     | Rodríguez-Merino, Argantonio<br>PhD researcher<br>Department of Plant Biology and Ecology, University of<br>Seville<br>Spain                                             | Rodríguez-Morales, Beatriz<br>Research Assistant, PhD student<br>University of Santiago de Compostela<br>Spain                                         |
| Rodríguez-Romero, A. Joseph<br>Professor<br>Instituto Politécnico Nacional<br>Mexico                                     | Rodriguez-Ros, Pablo<br>PhD Student in Oceanography (BSc Environmental<br>Sciences   MSc Global Change).<br>Institute of Marine Sciences (ICM-CSIC), Barcelona.<br>Spain | Rodriguez-Sanchez, Francisco<br>Estación Biológica de Doñana (CSIC)<br>Spain                                                                           |
| Rodriguez-Santalla, Inmaculada<br>Professor - Geology<br>Universidad Rey Juan Carlos<br>Spain                            | Rodriguez-Serrano, Enrique<br>Assistant Professor, Department of Zoology<br>Universidad de Concepción<br>Chile                                                           | Rodwell, Lynda<br>Associate Professor, Ecological Economics<br>University of Plymouth<br>United Kingdom of Great Britain and Northern Ireland<br>(the) |
| Roe, Byron<br>Emeritus Professor of Physics<br>University of Michigan<br>United States of America (the)                  | Roeder, Mareike<br>Assistant Professor<br>Xishuangbanna Tropical Botanical Garden<br>China                                                                               | Roediger, Sven<br>student of chemistry<br>TU Dresden<br>Germany                                                                                        |

|                                                                                                                                       |                                                                                                                                |                                                                                                                                            |
|---------------------------------------------------------------------------------------------------------------------------------------|--------------------------------------------------------------------------------------------------------------------------------|--------------------------------------------------------------------------------------------------------------------------------------------|
| Roelens, Jennifer<br>PhD student<br>KU Leuven<br>Belgium                                                                              | Roellig, Kathleen<br>Leibniz-Institute for Zoo- and Wildlife Research, Berlin<br>Germany                                       | Roemer, Charlotte<br>PhD student<br>MNHN<br>France                                                                                         |
| Roemer, Gary<br>Professor of Wildlife Ecology<br>New Mexico State University<br>United States of America (the)                        | Roendigs, Oliver<br>Professor of Mathematics<br>University of Osnabrueck<br>Germany                                            | Roesch, Lilo<br>United Kingdom of Great Britain and Northern Ireland<br>(the)                                                              |
| Roessingh, Peter<br>Biologist<br>Institute for Biodiversity and Ecosystem Dynamics,<br>University of Amsterdam<br>Netherlands (the)   | Roger, Fabian<br>Postdoctoral researcher in Ecology<br>University of Gotheburg<br>Sweden                                       | Roger, Friederike<br>PhD in Molecular Biology<br>University of Gothenburg<br>Sweden                                                        |
| Rogers, Amy E.<br>Conservation Biologist<br>Pinchot Institute for Conservation<br>United States of America (the)                      | Rogers, Daniel<br>Applied government ecologist<br>Australia                                                                    | Rogers, Danny<br>Ecologist<br>Birdlife Australia<br>Australia                                                                              |
| Rogers, Jason<br>Associate Professor of Psychology<br>Greensboro College<br>United States of America (the)                            | Rogers, Luke<br>PhD Candidate, Ecology and Evolutionary Biology<br>University of Toronto<br>Canada                             | Rogers, Sean M.<br>Associate Professor<br>University of Calgary<br>Canada                                                                  |
| Rogers, Stephen<br>International Consultant - Tropical Agriculture<br>Development<br>Stephen Rogers and Associates Ltd & FAO<br>Samoa | Rogge, Andreas<br>PhD candidate in Marine Biology<br>Alfred-Wegener-Institute for Polar and Marine Research<br>Germany         | Roggenbach, Markus<br>Professor of Computer Science<br>Swansea University<br>United Kingdom of Great Britain and Northern Ireland<br>(the) |
| roggy, jean-christophe<br>researcher/soil microbial ecology<br>INRA<br>French Guiana                                                  | Rogivue, Aude<br>PhD student, biology<br>Swiss Federal Institute for Forest, Snow and Landscape<br>Research WSL<br>Switzerland | Rohde, Klaus<br>Professor emeritus<br>University of New England<br>Australia                                                               |
| Rohloff, Roland<br>Germany                                                                                                            | Rohmer, Eric<br>Professor in robotics<br>Brazil                                                                                | Rohner, Chris<br>Principal Scientist<br>Marine Megafauna Foundation<br>Switzerland                                                         |
| ROIG, ANNA<br>Research Professor<br>Institut de Ciència de Materials de Barcelona<br>Spain                                            | Roig-Boixeda, Paula<br>International Nature Conservation<br>Georg-August-Universitat Goettingen<br>Spain                       | Roigers, Kerrylee<br>ARC Future Fellow/Earth and Environmental Science<br>University of Wollongong<br>Australia                            |

|                                                                                                                                                                    |                                                                                                                               |                                                                                                                                                                        |
|--------------------------------------------------------------------------------------------------------------------------------------------------------------------|-------------------------------------------------------------------------------------------------------------------------------|------------------------------------------------------------------------------------------------------------------------------------------------------------------------|
| Roiz, David *<br>Researcher<br>Institut de Recherche pour le Développement<br>France                                                                               | Rojas Andrés, Blanca M.<br>Assistant Professor / Botany<br>Leipzig University<br>Germany                                      | Rojas-Drummond, Sylvia Margarita<br>Professor of Psychology<br>Faculty of Psychology, National Autonomous University<br>of Mexico (UNAM)<br>Mexico                     |
| Rojas-Jimenez, Keilor<br>Microbial Ecology<br>Universidad Latina de Costa Rica<br>Costa Rica                                                                       | Rojas-Nossa, Sandra V.<br>Researcher - Ecology<br>University of Vigo and National University of Colombia<br>Spain             | Rojo Arias, Jesus Eduardo<br>PhD Student in Regenerative Medicine<br>Technische Universität Dresden<br>Germany                                                         |
| Rojo-Gimeno, Cristina<br>PhD candidate<br>Flanders research institute for agriculture, fisheries and<br>food; Social Sciences unit<br>Belgium                      | Rolán, Emilio<br>Research ad Honorem<br>Museo de Historia Natural, Universidad de Santiago de<br>Compostela<br>Spain          | Rolán-Alvarez, Emilio<br>Professor in Genetics<br>Universidad de Vigo<br>Spain                                                                                         |
| Rolandi, Ranieri<br>Professor of Applied Physics<br>University of Genoa<br>Italy                                                                                   | Rolando, Antonio<br>Full Professor of Ecology<br>University of Turin<br>Italy                                                 | Roldán-Clarà, Blanca<br>Profesor researcher<br>Universidad de Occidente<br>Mexico                                                                                      |
| Rolim, Samir<br>Researcher Community Ecology<br>Restinga and Atlantic Forest Laboratory, Federal<br>University of Espirito Santo, Sao Mateus, ES, Brazil<br>Brazil | Roll, Uri<br>Post-Doc / Conservation Biology<br>Ben-Gurion University<br>Israel                                               | Rolland, Jonathan<br>Postdoctoral researcher<br>University of Lausanne<br>Switzerland                                                                                  |
| ROLLIN, xavier<br>Catholic University of Louvain<br>Belgium                                                                                                        | Rollings, Nicholas<br>Associate Professor<br>University of the South Pacific<br>Fiji                                          | Rollins, Hilary<br>Ecology<br>United States of America (the)                                                                                                           |
| Rollins, Lee<br>Research Fellow / Molecular Ecology<br>Deakin University<br>Australia                                                                              | Rollinson, Njal<br>Assistant Professor of Ecology, Evolution, and<br>Environmental Studies<br>University of Toronto<br>Canada | Rolloda, Irjay<br>MS Environmental Science Student<br>Institute of Environmental Science & Meteorology -<br>University of the Philippines Diliman<br>Philippines (the) |
| Rolo, Victor<br>Research Fellow<br>University of Extremadura<br>Spain                                                                                              | Rolston, Hannah<br>Environmental Engineering<br>Oregon State University<br>United States of America (the)                     | Romanin, Louise<br>PhD candidate<br>University of Tasmania<br>Australia                                                                                                |



|                                                                                                                                     |                                                                                                                                                          |                                                                                                                                                            |
|-------------------------------------------------------------------------------------------------------------------------------------|----------------------------------------------------------------------------------------------------------------------------------------------------------|------------------------------------------------------------------------------------------------------------------------------------------------------------|
| Romanini, Rebeca<br>PhD Student - Plant Systematics<br>University of Campinas<br>Brazil                                             | Romaniuc-Neto, Sergio *<br>Scientific Researcher<br>Instituto de Botânica<br>Brazil                                                                      | Romano, Sarah<br>Assistant Professor, Environmental and Sustainability<br>Studies<br>Univeristy of Northern Colorado<br>United States of America (the)     |
| Romanyà, Joan<br>Soil Science Professor<br>Universitat de Barcelona<br>Spain                                                        | Romão, Marcos Vinicius Varjão<br>Doutorando<br>Universidade Estadual de Campinas<br>Brazil                                                               | Romeiro, Ademar<br>Economics professor<br>University of Campinas<br>Brazil                                                                                 |
| Römer, Miriam<br>Germany                                                                                                            | Romeralo, Carmen<br>Junior Researcher, Forest Pathologist<br>Sustainable Forest Management Research Institute,<br>University of Valladolid-INIA<br>Spain | Romero, Antonio<br>Biologist<br>Universidad Autonoma de Madrid<br>Spain                                                                                    |
| Romero, Daniel<br>PhD student<br>Universidad Complutense<br>Spain                                                                   | Romero, Estela<br>Researcher in Biological Oceanography<br>CNRS<br>France                                                                                | Romero, Eunice<br>PhD student<br>Universidad Nacional Autónoma de México<br>Mexico                                                                         |
| Romero, Marcelo Ricardo<br>Assistant Researcher of Chemistry<br>IPQA-CONICET<br>Argentina                                           | Romero, Phoebe<br>Energy efficiency consultant<br>United States of America (the)                                                                         | Romero, Rosana<br>Professor/Sistemática de Fanerógamas<br>Universidade Federal de Uberlândia<br>Brazil                                                     |
| Romero Gonzalez-Quijano, Clara<br>PhD candidate<br>Leibniz-Institute of Freshwater Ecology and Inland<br>Fisheries (IGB)<br>Germany | Romero-Mujalli, Daniel<br>Biology (PhD student)<br>University of Potsdam<br>Germany                                                                      | Romero-Muñoz, Alfredo<br>Researcher<br>Humboldt-Universität zu Berlin<br>Germany                                                                           |
| Romo, Helena<br>Associate professor<br>Dept. Biology, Universidad Autónoma de Madrid<br>Spain                                       | Romportl, Dušan<br>junior scientist /Landscape Ecology/<br>Charles University<br>Czech Republic (the)                                                    | Romulo, Chelsie<br>Assistant Professor in Environmental and Sustainability<br>Studies<br>University of Northern Colorado<br>United States of America (the) |
| Ron, Santiago<br>Professor<br>Pontificia Universidad Católica del Ecuador<br>Ecuador                                                | Roncaglio, Cynthia *<br>Porfessora universitária/Arquivologia/Ciência da<br>Informação<br>Universidade de Brasília<br>Brazil                             | Ronchail, Josyane<br>Teacher / Climatologist<br>University Paris 7 / Laboratory of Oceanography and<br>Climate (LOCEAN)<br>France                          |

|                                                                                                              |                                                                                                                                                                      |                                                                                                                                                                        |
|--------------------------------------------------------------------------------------------------------------|----------------------------------------------------------------------------------------------------------------------------------------------------------------------|------------------------------------------------------------------------------------------------------------------------------------------------------------------------|
| Rondeau, Marie-Helene<br>Biologist<br>Mi'gmaq Maliseet Aboriginal Fisheries Management Association<br>Canada | Ronge, Thomas A.<br>Postdoc Marine Geology<br>Alfred-Wegener-Institut Helmholtz Zentrum für Polar- und Meeresforschung<br>Germany                                    | Ronse De Craene, Louis<br>Botanist<br>Royal Botanic Garden Edinburgh<br>United Kingdom of Great Britain and Northern Ireland (the)                                     |
| Roon, David<br>Oregon State University<br>United States of America (the)                                     | Rooney, Thomas<br>Professor of Biological Sciences<br>Wright State University<br>United States of America (the)                                                      | Roos, Deon<br>PhD Candidate - Applied Ecology<br>University of Aberdeen<br>United Kingdom of Great Britain and Northern Ireland (the)                                  |
| Roos, Marco<br>Researcher/Examinor<br>Naturalis Biodiversity Centre<br>Netherlands (the)                     | Roosevelt, Anna C.<br>Professor of Anthropology<br>University of Illinois at Chicago<br>United States of America (the)                                               | Root, Stephanie<br>United States of America (the)                                                                                                                      |
| Ropars, Jeanne<br>Postdoc<br>Institut Pasteur<br>France                                                      | Ropars, Pascale<br>Postdoctoral Fellow<br>UQAR<br>Canada                                                                                                             | Roper, James<br>Professor, Ecology, Ornithology<br>Universidade Vila Velha<br>United States of America (the)                                                           |
| Roque, Fabio<br>Professor, Ecology<br>Federal University of Mato Grosso do Sul<br>Brazil                     | Roques, Séverine<br>Conservation genetics<br>IRSTEA<br>France                                                                                                        | Roquet, Cristina<br>Researcher<br>CNRS<br>France                                                                                                                       |
| Rosa, Isabel<br>Research Fellow<br>German Centre for Integrative Biodiversity Research (iDiv)<br>Germany     | Rosa, Sophia<br>MSc student in Biodiversity, Genetics and Evolution<br>Faculdade de Ciências da Universidade do Porto; CIBIO-InBio Universidade do Porto<br>Portugal | Rosan, Thais Michele<br>M.Sc. Remote Sensing<br>National Institute for Space Research<br>Brazil                                                                        |
| Rosas, Keysa<br>PhD Student; Ecology<br>University of Georgia<br>United States of America (the)              | Rösch, Andrea<br>PhD<br>Eawag<br>Switzerland                                                                                                                         | Rosche, Christoph<br>Post Doctoral Researcher<br>Independent Institute for Environmental Issues - UfU e.V.<br>Germany                                                  |
| Rose, Alexandra<br>Research Biologist<br>University of Colorado, Boulder<br>United States of America (the)   | Rose, Christa<br>Wildlife Biologist, Conservationist, Vegan<br>Native Species Support<br>United States of America (the)                                              | Rose, Deborah<br>Professor<br>UNSW<br>Australia                                                                                                                        |
| Rösel, Anja<br>PHD, Researcher, Geoscience/Cryosphere<br>Norwegian Polar Institute<br>Norway                 | Rosell, Carme<br>Wildlife Research Consultant<br>Universitat de Barcelona<br>Spain                                                                                   | Rosell, Julieta A.<br>Associate Researcher, sustainability science, plant ecology, agroecology, forest management<br>Universidad Nacional Autónoma de México<br>Mexico |

|                                                                                                                                             |                                                                                                                                                         |                                                                                                                                                                   |
|---------------------------------------------------------------------------------------------------------------------------------------------|---------------------------------------------------------------------------------------------------------------------------------------------------------|-------------------------------------------------------------------------------------------------------------------------------------------------------------------|
| Rosemartin, Alyssa<br>Ecologist<br>United States of America (the)                                                                           | Rosenberg, Andrew A<br>Director, Center for Science and Democracy<br>Union of Concerned Scientists<br>United States of America (the)                    | Rosenberg, Daniel<br>Ecologist<br>Oregon State University and Oregon Wildlife Institute<br>United States of America (the)                                         |
| Rosenberg, Robert<br>Professor of Biology<br>Earlham College<br>United States of America (the)                                              | Rosendahl, Knut Einar<br>Professor<br>Norwegian University of Life Sciences<br>Norway                                                                   | Rosenfield, Milena Fermina<br>Ecology<br>Universidade Federal do Rio Grande do Sul<br>Brazil                                                                      |
| Rosengrave, Patrice<br>Scientist<br>Otago University<br>New Zealand                                                                         | Rosengren, Malin<br>Post doc/Neurobiology<br>Department of neuroscience and physiology<br>Sweden                                                        | Rosenstein, Yvonne<br>Professor/Immunology<br>Universidad Nacional autonoma de Mexico (UNAM)<br>Mexico                                                            |
| Rosenthal, Gil<br>Professor of Biology<br>Texas A&M University<br>United States of America (the)                                            | Rosentreter, Roger<br>Botanist<br>Boise State University<br>United States of America (the)                                                              | Roser, David<br>Senior Research Associate/Environmental Risk<br>Assessment<br>UNSW Australia<br>Australia                                                         |
| Rosetti, Marcos<br>Associate Professor<br>Universidad Nacional Autónoma de México<br>Mexico                                                 | Rosier, Ine<br>KU Leuven<br>Belgium                                                                                                                     | Rosindell, James<br>Research Fellow / Lecturer in Biodiversity Theory<br>Imperial College London<br>United Kingdom of Great Britain and Northern Ireland<br>(the) |
| Rosinski Lima Gomes, Maria Cecilia<br>researcher (sanitation)<br>Mamirauá Institute for Sustainable Development<br>Brazil                   | Rosli, Mohd Fariq<br>Assistant Curator, Zoology<br>Kuala Lumpur Bird Park<br>Malaysia                                                                   | Rosov, Kimberley<br>Research Scientist<br>University of North Carolina Wilmington<br>United States of America (the)                                               |
| Ross, Darrell<br>Professor, Forest Entomology<br>Oregon State University<br>United States of America (the)                                  | Ross, Rebecca<br>Post Doctoral Research Fellow (Marine Ecology)<br>Plymouth University<br>United Kingdom of Great Britain and Northern Ireland<br>(the) | Rossa, Bernd<br>assoc. Professor, Mathematics<br>Xavier University<br>United States of America (the)                                                              |
| Rossabi, Sam<br>Research Assistant - Atmospheric Chemistry<br>University of Colorado at Boulder - INSTAAR<br>United States of America (the) | Rosseland, Bjorn Olav<br>Professor Emeritus in Ecotoxicology<br>Norwegian University of Life Sciences<br>Norway                                         | ROSSI, ANA LUIZA<br>BIOLGYST<br>UNICAMP<br>Brazil                                                                                                                 |
| Rossi, Magali<br>Forest officer<br>FSC<br>France                                                                                            | Rossi, Natacha<br>PhD<br>CRCA<br>France                                                                                                                 | Rossi, Sergio<br>Full Professor of Economics<br>University of Fribourg<br>Switzerland                                                                             |

|                                                                                                                                                        |                                                                                                             |                                                                                                                                                                      |
|--------------------------------------------------------------------------------------------------------------------------------------------------------|-------------------------------------------------------------------------------------------------------------|----------------------------------------------------------------------------------------------------------------------------------------------------------------------|
| Rossi Nakayama, Cristina<br>Assistant Professor in Sanitation and Environmental Treatment<br>Federal University of Sao Paulo<br>Brazil                 | Rößner, Maximilian<br>doctoral student<br>Department of Silviculture and Forest Ecology<br>Germany          | Rosso, Antonietta<br>Full Professor in Paleontology<br>University of Catania<br>Italy                                                                                |
| Rostagno, César Mario<br>Senior Research Scientist / Soil / Range Management<br>IPEEC (Conicet, National Council for Scientific Research)<br>Argentina | Rostant, Luke<br>Lecturer in Wildlife Biology<br>The University of the West Indies<br>Trinidad and Tobago   | Rostas, Michael<br>Senior Lecturer in Entomology<br>Lincoln University<br>New Zealand                                                                                |
| Rostro-García, Susana<br>University of Oxford<br>United Kingdom of Great Britain and Northern Ireland (the)                                            | Rota, Jadranka<br>Researcher in biology<br>Lund University<br>Sweden                                        | Roterman, Christopher<br>Postdoctoral Researcher in Deep-Sea Molecular Ecology<br>University of Oxford<br>United Kingdom of Great Britain and Northern Ireland (the) |
| Roth, Morgane *<br>Biology<br>ETH Zurich<br>Switzerland                                                                                                | ROTH, PAULO RICARDO DE *<br>Biologist<br>University of São Paulo<br>Brazil                                  | Rothermel, Betsie<br>Associate Research Biologist<br>Archbold Biological Station<br>United States of America (the)                                                   |
| Rothhaupt, Karl-Otto<br>Professor of Limnology<br>University of Konstanz<br>Germany                                                                    | Rothman, Andrea<br>United States of America (the)                                                           | Rothschild, Bruce<br>Professor of Mathematics, Emeritus<br>University of California, Los Angeles<br>United States of America (the)                                   |
| Rothwell, Gar<br>Distinguished Professor of Environmental and Plant Biology<br>Ohio University<br>United States of America (the)                       | Rotmann, Sea<br>CEO<br>SEA - Sustainable Energy Advice Ltd<br>New Zealand                                   | Roturier, Samuel<br>Assistant Professor - Restoration ecology<br>AgroParisTech<br>France                                                                             |
| Roubos, Hans<br>Principal Scientist<br>DSM<br>Netherlands (the)                                                                                        | Round, Christopher<br>Environmental Scientist<br>George Mason University<br>United States of America (the)  | Round, Philip<br>Associate Professor, Biology<br>Faculty of Science, Mahidol University, Bangkok<br>Thailand                                                         |
| Rousseau, Guillaume<br>Soil biology scientist and lecturer<br>Maranhão State University<br>Brazil                                                      | Rousset, Francois<br>Senior Scientist, Evolutionary biology<br>CNRS and University of Montpellier<br>France | Rousset, Raphaël<br>PhD, Research scientist in Biology<br>CNRS<br>France                                                                                             |
| Rout, Tracy<br>Research Fellow, Conservation Science<br>The University of Queensland<br>Australia                                                      | Roux, Nicolas<br>Master of Environmental and agricultural economics<br>The University of Tokyo<br>Japan     | Roux, Philippe<br>Researcher<br>Irstea<br>France                                                                                                                     |

\* indicates individual also signed 1992 Scientists' Warning to Humanity

|                                                                                                             |                                                                                                                                             |                                                                                                                                                                                             |
|-------------------------------------------------------------------------------------------------------------|---------------------------------------------------------------------------------------------------------------------------------------------|---------------------------------------------------------------------------------------------------------------------------------------------------------------------------------------------|
| Rove, Sipuru<br>Risk Resilience & Development Advisor<br>Pacific Risk Resilience Program<br>Solomon Islands | Rovelli, Valentina<br>Postdoc / Molecular Ecology, Conservation Genetics<br>University of Haifa<br>Italy                                    | Rovero, Francesco<br>Researcher and museum Curator in tropical biodiversity<br>MUSE - Museo delle Scienze, Trento, Italy<br>Italy                                                           |
| Rovida, Costanza<br>Scientific Officer<br>CAAT-Europe Konstanz University<br>Germany                        | Rowe, Julia<br>Research Scientist<br>Arizona-Sonora Desert Museum<br>United States of America (the)                                         | Rowe, Locke<br>Professor, Evolutionary Biology<br>University of Toronto<br>Canada                                                                                                           |
| Rowland, Jessica<br>PhD candidate<br>Deakin University<br>Australia                                         | ROY, ASIT KUMAR<br>RESEARCH SCHOLAR<br>JADAVPUR UNIVERSITY<br>India                                                                         | Roy, Joyashree<br>Professor of Economics<br>Jadavpur University<br>India                                                                                                                    |
| Roy, Melyssa<br>Doctor/Professional Practice Fellow<br>University of Otago<br>New Zealand                   | Royle, Nick<br>Senior Lecturer in Behavioural Ecology<br>University of Exeter<br>United Kingdom of Great Britain and Northern Ireland (the) | Rozas, Daniel<br>PhD candidate<br>Center for Development Research, Germany/Laboratorio de Planificación Territorial, Chile<br>Chile                                                         |
| Rozema, Patrick<br>Microbial Oceanography<br>University of Groningen<br>Netherlands (the)                   | Rozsa, Lajos<br>senior researcher<br>Hungarian Academy of Sciences<br>Hungary                                                               | Rozzi, Ricardo<br>Director, Subantarctic Biocultural Conservation Program,<br>Professor, Ecology & Philosophy<br>University of North Texas, USA & Universidad de Magallanes, Chile<br>Chile |
| RS Guimarães, Leonardo<br>Plant Systematics<br>Brazil                                                       | Ruano, Francisca<br>Lecturer. Zoology. Entomology. Agroecosystems<br>University of Granada<br>Spain                                         | Rubach, Florian<br>Germany                                                                                                                                                                  |
| Rubalcaba, Juan<br>Postdoctoral Researcher<br>Rey Juan Carlos University<br>Spain                           | Rubianes Landazuri, Francisco<br>Teacher/Researcher Tropical Ecology<br>Universidad San Francisco de Quito<br>Ecuador                       | Rubido, Nicolás<br>Adjunct Professor<br>Universidad de la República<br>Uruguay                                                                                                              |
| Rubie-Davies, Christine<br>EDucational Psychology reseracher<br>University of Auckland<br>New Zealand       | Rubinoff, Daniel<br>Professor of Entomology<br>The University of Hawaii<br>United States of America (the)                                   | Rubio, Vanessa E<br>University of Maryland<br>Colombia                                                                                                                                      |
| Rubió, Marcel<br>mathematician<br>KU Leuven<br>Belgium                                                      | Rubio Sánchez, Agustín<br>Professor<br>Universidad Politécnica de Madrid<br>Spain                                                           | Rubio Teso, María Luisa<br>PhD researcher - Crop Wild Relatives and Ecology<br>Universidad Rey Juan Carlos<br>Spain                                                                         |

|                                                                                                                                                                     |                                                                                                                                         |                                                                                                                                                          |
|---------------------------------------------------------------------------------------------------------------------------------------------------------------------|-----------------------------------------------------------------------------------------------------------------------------------------|----------------------------------------------------------------------------------------------------------------------------------------------------------|
| Rubio-Ferrera, Irene<br>PhD Student (Biology)<br>Universidad Autónoma de Madrid<br>Spain                                                                            | Rubio-Varas, M.d.Mar<br>Associate Professor<br>Universidad Pública de Navarra<br>Spain                                                  | Ruby, Edward *<br>Steenbock Professor of Microbiological Sciences<br>University of Wisconsin, Madison<br>United States of America (the)                  |
| Ruch, David<br>Professor of Mathematics<br>Metropolitan State University of Denver<br>United States of America (the)                                                | Ruchisansakun, Saroj<br>Plant Evolution and Taxonomy<br>Naturalis Biodiversity Center, the Netherlands<br>Thailand                      | Rücklin, Martin<br>Senior researcher - Palaeobiology<br>Naturalis Biodiversity Center<br>Netherlands (the)                                               |
| Rudd, Murray<br>Professor / Nippon Foundation Chair in Sustainable<br>Marine Management and Ocean Governance<br>World Maritime University (from Jan 2018)<br>Sweden | Rudge, Marilza<br>Full professor of Obstetrics<br>UNESP<br>Brazil                                                                       | Rudnick, Deborah<br>K-5 Science Resources Coordinator<br>Bainbridge Island School District<br>United States of America (the)                             |
| Rudyal, Yuli<br>mahtematic<br>United States of America (the)                                                                                                        | Rueda, Juan *<br>Biologist-Limnologist<br>University of Valencia (Spain)<br>Spain                                                       | Rueda, Marta<br>Postdoctoral fellow /Ecology<br>Estación Biológica de Doñana (EBD-CSIC)<br>Spain                                                         |
| Rueda, Rebeca<br>Researcher<br>University Michoacana de San Nicolás de Hidalgo<br>Mexico                                                                            | Rueda Hernandez, Rafael<br>Posdoc<br>Instituto de Ecología<br>Mexico                                                                    | Ruedas, Luis<br>Associate Professor of Biology; Director, Museum of<br>Vertebrate Biology<br>Portland State University<br>United States of America (the) |
| Rüegg, Joëlle<br>Senior Researcher, Environmental Epigenetics<br>Swedish Toxicology Science Research Center (Swetox)<br>and Karolinska Institutet<br>Sweden         | Rüegg, Simon R.<br>Veterinary Epidemiologist<br>University of Zürich<br>Switzerland                                                     | Rueppell, Olav<br>Professor of Biology<br>University of North Carolina at Greensboro<br>United States of America (the)                                   |
| Ruete, Alejandro<br>Analyst/Researcher<br>Greensway AB<br>Sweden                                                                                                    | Ruetzler, Klaus<br>Research Biologist Emeritus<br>Smithsonian Institution<br>United States of America (the)                             | Ruez, Dennis<br>Professor of Environmental Studies<br>University of Illinois at Springfield<br>United States of America (the)                            |
| Rufin, Philippe<br>Doctoral Student / Remote Sensing<br>Geography Department, Humboldt Universität zu Berlin<br>Germany                                             | Rüger, Nadja<br>Research fellow, Ecology<br>German Centre for Integrative Biodiversity Research<br>(iDiv) Halle-Jena-Leipzig<br>Germany | Ruggiero, Patricia G C<br>PhD Candidate<br>Department of Ecology, University of São Paulo<br>Brazil                                                      |
| Ruhi, Albert<br>Postdoctoral Fellow, ecology<br>National Socio-Environmental Synthesis Center (SESYNC)<br>United States of America (the)                            | Ruhl, Nathan<br>Biological Sciences<br>Rowan University<br>United States of America (the)                                               | Rühl, Saskia<br>PhD Researcher in Marine Biogeochemistry<br>Plymouth Marine Laboratory<br>United Kingdom of Great Britain and Northern Ireland<br>(the)  |

|                                                                                                                                         |                                                                                                                                                                                                           |                                                                                                                                                                           |
|-----------------------------------------------------------------------------------------------------------------------------------------|-----------------------------------------------------------------------------------------------------------------------------------------------------------------------------------------------------------|---------------------------------------------------------------------------------------------------------------------------------------------------------------------------|
| Ruhland, Christopher T.<br>Professor of Biological Sciences<br>Minnesota State University, Mankato<br>United States of America (the)    | Rühr, Peter T.<br>Research Assistant ( $\mu$ CT & 3D-reconstruction)<br>Zoologisches Forschungsmuseum Alexander Koenig Bonn<br>(ZFMK), Zentrum für Molekulare Biodiversitätsforschung<br>(zmb)<br>Germany | Ruiz, Enrico A<br>Professor<br>Instituto Politecnico Nacional<br>Mexico                                                                                                   |
| Ruiz, Itxaso<br>Junior Researcher<br>UPV/EHU (University of the Basque Country) and BC3<br>(Basque Centre for Climate Change))<br>Spain | Ruiz De Gamboa, Margarita<br>Biologist, PhD student<br>Facultad de Recursos Naturales Renovables, Universidad<br>Arturo Prat, Avenida Arturo Prat s/n Campus<br>Huayquique, Iquique, Chile.<br>Chile      | Ruiz Moreno, Alfonso<br>Honours Student in Marine Biology and Ecology<br>James Cook University<br>Australia                                                               |
| Ruiz Velasco Leyva, Mariana<br>Graduate student in human genomics<br>European Molecular Biology Laboratory - Heidelberg<br>Germany      | Ruiz-Aravena, Manuel<br>PhD Candidate<br>University of Tasmania<br>Chile                                                                                                                                  | Ruiz-Benito, Paloma<br>Postdoctoral Fellow<br>Universidad de Alcalá<br>Spain                                                                                              |
| Ruiz-Fons, Francisco<br>Researcher<br>Spanish National Research Council CSIC<br>Spain                                                   | Ruiz-Gallardo, José-Reyes *<br>Profesor of Science Education<br>Faculty of Education- University of Castilla-La Mancha<br>Spain                                                                           | Ruiz-Gutiérrez, Rosaura<br>Professor Evolution<br>University National Autonomous of México<br>Mexico                                                                      |
| Ruiz-Jones, Lupita<br>Postdoc<br>Stanford<br>United States of America (the)                                                             | Ruiz-Martinez, Gabriel<br>Coastal Engineering<br>Mexico                                                                                                                                                   | Ruiz-Mirazo, Kepa<br>Researcher on origins of life<br>University of the Basque Country<br>Spain                                                                           |
| Ruiz-Rodríguez, Magdalena<br>Postdoctoral researcher / Biology<br>Sorbonne Universités - Université Pierre et Marie Curie<br>France     | Rulik, Björn<br>Taxonomic Coordination GBOL / Dipterist<br>Zoologisches Forschungsmuseum A. Koenig<br>Germany                                                                                             | Ruloffs, Verena<br>Masterstudent of Bioinformatics<br>University Leipzig<br>Germany                                                                                       |
| Rumes, Bob<br>Researcher - Aquatic Ecology<br>Royal Belgian Institute of Natural Sciences<br>Belgium                                    | Rumeu, Beatriz<br>Spain                                                                                                                                                                                   | Rumiz, Damián<br>Scientific Editor / Conservation Education / Wildlife<br>Ecology<br>Centro Ecopedagógico - Fundación Simón I. Patiño<br>Bolivia (Plurinational State of) |
| Rumpel, Cornelia<br>Research Director<br>CNRS<br>France                                                                                 | Rumpf, Sabine<br>PhD student<br>University of Vienna<br>Austria                                                                                                                                           | Rundel, Philip<br>Distinguished Professor<br>UCLA<br>United States of America (the)                                                                                       |

|                                                                                                                                                                |                                                                                                                   |                                                                                                                         |
|----------------------------------------------------------------------------------------------------------------------------------------------------------------|-------------------------------------------------------------------------------------------------------------------|-------------------------------------------------------------------------------------------------------------------------|
| Runnel, Kadri<br>Researcher in Conservation Biology<br>Tartu University<br>Estonia                                                                             | Ruocco, Miriam<br>PhD student<br>Stazione Zoologica Anton Dohrn<br>Italy                                          | Ruokolainen, Kalle<br>Researcher in biogeography<br>University of Turku<br>Finland                                      |
| Ruppel, Silke<br>senior scientist<br>Leibniz Institute of Vegetable and Ornamental Crops<br>Großbeeren<br>Germany                                              | Rus Perez, Jose Roberto<br>professor<br>Universidade Federal do Oeste Paraense<br>Brazil                          | Rusch, Graciela M.<br>Senior Research Scientist, Ecology<br>Norwegian Institute for Nature Research<br>Norway           |
| Rush, Ben<br>Junior Doctor, Emergency Medicine and Public Health<br>NHS<br>United Kingdom of Great Britain and Northern Ireland<br>(the)                       | Rushforth, Sam *<br>Dean of Science Emeritus<br>Utah Valley University<br>United States of America (the)          | Rusi, Sergio<br>Professor of Hydrogeology<br>University Of Chieti-Pescara<br>Italy                                      |
| Ruskey, Abigail<br>Environmental and Sustainability Education Strategist<br>United States of America (the)                                                     | Russell, Avery<br>Postdoctoral Research Fellow<br>University of Pittsburgh<br>United States of America (the)      | Russell, Charlene *<br>Science and Maths Teacher<br>Kings School, KwaZulu-Natal<br>South Africa                         |
| Russell, Grace<br>Marine Mammal Science<br>United Kingdom of Great Britain and Northern Ireland<br>(the)                                                       | Russell, Joshua<br>Fisheries Biologist<br>Russell<br>United States of America (the)                               | Rust, Niki<br>Technical Adviser - Wildlife<br>WWF-UK<br>United Kingdom of Great Britain and Northern Ireland<br>(the)   |
| Rust, Tyler<br>PhD student, Environmental Geochemistry<br>Binghamton University<br>United States of America (the)                                              | Ruta, Rafal<br>Entomologist<br>University of Wroclaw<br>Poland                                                    | Rutina, Lucas *<br>Research Scholar/Wildlife Ecology<br>University of Botswana<br>Botswana                              |
| RUTKOWSKI, EMÍLIA WANDA<br>associate professor - urban environmental planning<br>State University of Campinas - UNICAMP<br>Brazil                              | Rutten, Anneleen<br>PhD Student Biology and Human-Wildlife Conflicts<br>University of Antwerp<br>Belgium          | Ryabov, Alexey<br>Senior scientist<br>University of Oldenburg<br>Germany                                                |
| Ryan, Conor<br>Associate Research Scientist, marine zoologist<br>Marine Conservation Research<br>United Kingdom of Great Britain and Northern Ireland<br>(the) | Ryan, Joseph<br>Assistant Professor<br>Whitney Laboratory for Marine Bioscience<br>United States of America (the) | Ryan, Justin<br>Research Academic, Landscape Ecohydrology &<br>Restoration<br>The University of Queensland<br>Australia |



|                                                                                                                                          |                                                                                                                                     |                                                                                                                                                     |
|------------------------------------------------------------------------------------------------------------------------------------------|-------------------------------------------------------------------------------------------------------------------------------------|-----------------------------------------------------------------------------------------------------------------------------------------------------|
| Ryan, Ken<br>Associate Professor of Antarctic Biology<br>Victoria University of Wellington<br>New Zealand                                | Ryan, Sadie<br>Associate Professor of Medical Geography<br>University of Florida<br>United States of America (the)                  | Ryan, Steven<br>PhD candidate<br>James Cook University<br>Australia                                                                                 |
| Ryder, Christina<br>Graduate Student<br>University of Colorado Boulder<br>United States of America (the)                                 | Ryerson, William<br>President<br>Population Media Center<br>United States of America (the)                                          | Rylands, Anthony<br>Senior Research Scientist<br>Conservation International<br>United States of America (the)                                       |
| Rymer, Tasmin<br>Lecturer<br>James Cook University<br>Australia                                                                          | Rytkonen, Kalle<br>Marie Curie Fellow / Biomedicine<br>University of Turku<br>Finland                                               | Rzedowski, Martha<br>Cinvestav-IPN<br>Mexico                                                                                                        |
| S, Jeevaraj<br>Senior Research Fellow (CSIR)<br>National Institute of Technology Tiruchirappalli<br>India                                | S. de Souza, Rafael<br>Astrophysicist<br>University of North Carolina at Chapel Hill<br>United States of America (the)              | S. Faria, Gonçalo<br>PhD student, Evolutionary biology<br>University of St Andrews<br>United Kingdom of Great Britain and Northern Ireland<br>(the) |
| sá, rui M.<br>Assistant Professor in Biology and Anthropology<br>University of Coimbra and Universidade Lusófona da<br>Guiné<br>Portugal | Saatkamp, Arne<br>lecturer (Maître de conférences)<br>Aix Marseille Univ, Univ Avignon, CNRS, IRD, IMBE<br>France                   | Saba, Viki *<br>Geographer<br>Leibniz Institute for Baltic sea research<br>Germany                                                                  |
| Sabagh, Leandro<br>Professor<br>Universidade Federal do Rio de Janeiro<br>Brazil                                                         | Sabaté, Santi<br>Prof. at Evolutionary Biology, Ecology and Environmental<br>Sciences<br>University of Barcelona and CREAF<br>Spain | Sabater, Sergi<br>University Professor of Ecology<br>ICRA and University of Girona<br>Spain                                                         |
| Sabatier, Sylvie<br>researcher in botany<br>CIRAD<br>France                                                                              | Sabbagh, Stéphanie Marie<br>PhD student, fisheries and coral reef sciences<br>Concordia<br>Canada                                   | Sabelis, Ida<br>Organizational Studies / Org. Anthropology - Associate<br>Professor<br>Vrije Universiteit - VU - Amsterdam<br>Netherlands (the)     |
| Sabino, Jose<br>Professor/PhD in Ecology<br>Universidade Anhanguera-Uniderp<br>Brazil                                                    | Sabot, Francois *<br>Research Director<br>IRD<br>France                                                                             | Sabyrbekov, Rahat<br>Economics<br>American University of Central Asia, Norwegian<br>University of Life Sciences<br>Kyrgyzstan                       |

|                                                                                                                                          |                                                                                                                                                   |                                                                                                                                                           |
|------------------------------------------------------------------------------------------------------------------------------------------|---------------------------------------------------------------------------------------------------------------------------------------------------|-----------------------------------------------------------------------------------------------------------------------------------------------------------|
| Sache, Ivan<br>Professor<br>AgroParisTech<br>France                                                                                      | Sachs, Corinna<br>Molecular Ecology<br>Institute of Groundwater Ecology, Helmholtz Centre<br>Munich<br>Germany                                    | Sachse, Carsten<br>Group leader/Biochemistry<br>European Molecular Biology Laboratory<br>Germany                                                          |
| Sacristán Moraga, Daniel<br>Post-doctoral researcher<br>University of Cordoba<br>Spain                                                   | Sacristán Velasco, Alberto *<br>PhD<br>University of Valladolid<br>Spain                                                                          | Sacristán-Soriano, Oriol<br>Postdoctoral Researcher<br>Centro de Estudios Avanzados de Blanes (CEAB, CSIC);<br>University of Richmond, VA<br>Spain        |
| Sadanand, Chandrika<br>Postdoctoral fellow, mathematics<br>Hebrew University of Jerusalem<br>Israel                                      | Sadedin, Suzanne<br>Evolutionary biology<br>Independent researcher<br>United States of America (the)                                              | Sadeh, Maya<br>PhD student Environmental Epidemiology<br>Tel-Aviv University<br>Israel                                                                    |
| Saebefeld, Manja<br>Doctoral student, Evolutionary Ecology<br>Leibniz-Institute of Freshwater Ecology and Inland<br>Fisheries<br>Germany | Saeed, Shafqat<br>Chairman Department of Entomology/Director External<br>Linkages,<br>MNS University of Agriculture, Multan<br>Pakistan           | Saenz, Benjamin<br>Marine Ecologist<br>United States of America (the)                                                                                     |
| Saenz, Joel<br>Professor/Researcher<br>Universidad Nacional<br>Costa Rica                                                                | Saenz-Agudelo, Pablo<br>Assistant Professor<br>Universidad Austral de Chile<br>Chile                                                              | Sagebiel, James<br>research scientist, vertebrate paleontology<br>The University of Texas<br>United States of America (the)                               |
| Sagot, Maria<br>Assistant Professor, Biology<br>State University of New York at Oswego<br>United States of America (the)                 | Saguba, Peter<br>Biology Environmental Science Lecturer<br>Pacific Adventist University<br>Papua New Guinea                                       | Saha, Amartya *<br>Ecohydrologist<br>Archbold Biological Station<br>United States of America (the)                                                        |
| Sahajpal, Ritvik<br>Research Assistant Professor<br>University of Maryland College Park<br>United States of America (the)                | Saher, Margot<br>Lecturer in geological oceanography<br>Bangor University<br>United Kingdom of Great Britain and Northern Ireland<br>(the)        | Sahling, Heiko<br>Senior Scientist<br>Department of Geosciences, University of Bremen, 28359<br>Bremen<br>Germany                                         |
| Sahoo, Deepak<br>Lecturer, Computer Science<br>Swansea University<br>United Kingdom of Great Britain and Northern Ireland<br>(the)       | Sainsbury, Tony<br>Senior Lecturer in Wild Animal Health<br>Institute of Zoology<br>United Kingdom of Great Britain and Northern Ireland<br>(the) | saint, christopher<br>Professor and Director, China - Australia Centre for<br>Sustainable Urban Development<br>University of South Australia<br>Australia |
| Saint-Amand, Antoine<br>PhD student / Environmental sciences<br>Université catholique de Louvain<br>Belgium                              | Saint-Charles, Johanne<br>Full professor<br>UQAM<br>Canada                                                                                        | Saint-Clair, Rafael *<br>Universidade do Estado do Rio de Janeiro<br>Brazil                                                                               |

|                                                                                                                                                |                                                                                                                                                    |                                                                                                                                                                                               |
|------------------------------------------------------------------------------------------------------------------------------------------------|----------------------------------------------------------------------------------------------------------------------------------------------------|-----------------------------------------------------------------------------------------------------------------------------------------------------------------------------------------------|
| Saito, Dai<br>Silviculture<br>Japan                                                                                                            | Sakulich, John<br>Associate Professor of Biology<br>Regis University<br>United States of America (the)                                             | Sala, Iria<br>PhD Student, Oceanography<br>University of Cádiz<br>Spain                                                                                                                       |
| Sala, Jordi<br>External Researcher<br>Institute of Aquatic Ecology, University of Girona<br>Spain                                              | Salako, Valere<br>Lecturer and Researcher / Forestry and Biostatistics<br>Faculty of Agronomic Sciences / University of Abomey-<br>Calavi<br>Benin | Salama, Adnan *<br>Marine Biology Department<br>King Abdulaziz University, Faculty of marine science<br>Saudi Arabia                                                                          |
| Salama, Mohammad Suhyb<br>Associate Professor of Hydrologic Optics and<br>Environmental Hydrology<br>University of Twente<br>Netherlands (the) | SALAMOLARD, Marc<br>chargé de mission Faune<br>Reunion National Park<br>Réunion                                                                    | Salas, Silvia<br>Fisheries assessment and management<br>Cinvestav<br>Mexico                                                                                                                   |
| Salas Lopez, Alex<br>PhD community ecology<br>Centre Nationale Recherche Scientifique France<br>France                                         | Salat, Jordi<br>Oceanographer<br>Institut de Ciències del Mar (CSIC)<br>Spain                                                                      | Salata, Joseph J<br>Physiologist-Pharmacologist<br>Retired<br>United States of America (the)                                                                                                  |
| Salazar, Alvaro<br>land-atmosphere interactions<br>University of Queensland<br>Australia                                                       | Salazar, Christian<br>Associate Professor<br>Universidad del Desarrollo<br>Chile                                                                   | Salazar, Gerardo<br>Senior Researcher; diversity, systematics and evolution of<br>Neotropical flowering plants<br>Instituto de Biología, Universidad Nacional Autónoma de<br>Mexico<br>Mexico |
| Salazar, Rosie<br>Zoologist<br>University of Oxford<br>United Kingdom of Great Britain and Northern Ireland<br>(the)                           | Salazar-Bravo, Jorge<br>Associate Professor, Biological Sciences<br>Texas Tech University<br>United States of America (the)                        | Salazar-Mendías, Carlos<br>Lecturer<br>University of Jaén<br>Spain                                                                                                                            |
| Salcedo-Castro, Julio<br>Researcher<br>Centro de Estudios Avanzados, Universidad de Playa<br>Ancha<br>Chile                                    | Salcido-Guevara, Luis Antonio<br>Profesor<br>University Autonomous of Sinaloa<br>Mexico                                                            | Saldaña, Alfredo<br>Associate Professor<br>Universidad de Concepcion<br>Chile                                                                                                                 |
| Saldaña-Vázquez, Romeo<br>Postdoctoral Fellow<br>INIRENA-UMSNH<br>Mexico                                                                       | Saldanha, Luiz Leonardo<br>Post-doctorate / Botany<br>University of Sao Paulo State UNESP<br>Brazil                                                | Saldanha Bueno, Anderson<br>Lecturer in Biology and Ecology<br>Instituto Federal de Educação, Ciência e Tecnologia<br>Farroupilha<br>Brazil                                                   |

|                                                                                                                            |                                                                                                                                    |                                                                                                                                                                  |
|----------------------------------------------------------------------------------------------------------------------------|------------------------------------------------------------------------------------------------------------------------------------|------------------------------------------------------------------------------------------------------------------------------------------------------------------|
| Sale, Peter F<br>Distinguished University Professor, Emeritus (Biology: marine ecology)<br>University of Windsor<br>Canada | Salgado-Barragán, Jose<br>Biologist<br>Universidad Nacional Autónoma de México<br>Mexico                                           | Salgueiro, Pedro<br>Conservation Biology Researcher<br>University of Évora<br>Portugal                                                                           |
| Saliendra, Nicanor<br>Ecologist<br>USDA ARS NGPRL<br>United States of America (the)                                        | Salimon, Cleber<br>Professor of Ecology<br>Paraíba State University<br>Brazil                                                      | Salinas, Fernanda<br>Ecologist<br>FIMA<br>Chile                                                                                                                  |
| Salinas, Marisa<br>Researcher; Sociology<br>UC Santa Barbara<br>United States of America (the)                             | Salinas-Melgoza, Alejandro<br>Assistant Profesor<br>Universidad Michoacana de san Nicolas de Hidalgo<br>Mexico                     | Salinger, Jim<br>Honorary Research Fellow, Climate Science<br>University of Otago<br>New Zealand                                                                 |
| Salino, Alexandre<br>Full Professor<br>Universidade Federal de Minas Gerais<br>Brazil                                      | Salis, Lucia<br>NIOO-KNAW<br>Netherlands (the)                                                                                     | Sallaberry-Pincheira, Nicole<br>Directora Unidad de Rehabilitación de Fauna Silvestre<br>Andrés Bello University<br>Chile                                        |
| Sallée, Jean-Baptiste<br>Research Scientist - ocean and climate<br>CNRS<br>France                                          | SALLES, FREDERICO<br>Associate Professor<br>Universidade Federal do Espirito Santo<br>Brazil                                       | Salman, Ibrahim<br>Ecology<br>Ben-Gurion University of the Negev<br>Israel                                                                                       |
| Salmon, Enrique<br>Professor<br>California State University East Bay<br>United States of America (the)                     | Salmon, Michael<br>Research Professor<br>Florida Atlantic University<br>United States of America (the)                             | Salo, Matti<br>Adjunct Professor in Biodiversity and Natural Resources Governance<br>Natural Resources Institute Finland (Luke) / University of Turku<br>Finland |
| Salomaa, Anna<br>PhD student, environmental change and policy<br>University of Helsinki<br>Finland                         | Salomão, Valéria<br>bióloga<br>uema<br>Brazil                                                                                      | salomez, melanie<br>temporary teacher and researcher<br>University Montpellier 2<br>France                                                                       |
| Saloniemi, Irma<br>Biology<br>University of Turku<br>Finland                                                               | Salovius-Laurén, Sonja<br>Senior researcher, Marine Biology<br>Environmental and Marine Biology, Åbo Akademi University<br>Finland | Salpeteur, Matthieu<br>Anthropologist<br>IRD<br>France                                                                                                           |
| Salvadó, Humbert<br>Professor of Animal Biology<br>University of Barcelona<br>Spain                                        | Salvador, Alfredo<br>Investigador Científico/ Herpetology<br>Museo nacional de Ciencias Naturales (CSIC)<br>Spain                  | Salvador, Gilberto<br>PhD student<br>UFPA<br>Brazil                                                                                                              |

|                                                                                                                                  |                                                                                                                                                   |                                                                                                                                                                                                        |
|----------------------------------------------------------------------------------------------------------------------------------|---------------------------------------------------------------------------------------------------------------------------------------------------|--------------------------------------------------------------------------------------------------------------------------------------------------------------------------------------------------------|
| Salvador, Rodrigo Brincalepe<br>Postdocotrual researcher (Malacology)<br>Brazil                                                  | Salvarina, Ioanna<br>Postdoc<br>Limnological Institute, University of Konstanz<br>Germany                                                         | Salvi, Daniele<br>Assistant Professor<br>University of L'Aquila<br>Italy                                                                                                                               |
| Salviato, Marco<br>Mechanical Engineer<br>Italy                                                                                  | Samaniego, Horacio<br>Assistant Professor<br>Universidad Austral de Chile<br>Chile                                                                | Samarut, Jacques<br>Honorary Professor<br>Ecole Normale Supérieure de Lyon<br>France                                                                                                                   |
| SAMBIENI, Kouagou Raoul<br>Landscape Ecology<br>University of Parakou ( Benin) and University of Kinshasa<br>(DRC)<br>Benin      | Samia, Diogo<br>Postdoctoral Researcher<br>Department of Ecology, University of Sao Paulo<br>Brazil                                               | Samijadi, Sarah<br>Physician<br>Academic hospital Paramaribo<br>Suriname                                                                                                                               |
| Sampaio, Ana<br>MSc student<br>Faculdade de Ciências da Universidade de Lisboa<br>Portugal                                       | Sampaio, Ricardo<br>Environmental Analyst<br>National Research Center for Carnivore Conservation<br>(CENAP/ICMBio), Atibaia, SP, Brazil<br>Brazil | Sampaio Franco, Ana Clara<br>PhD student in Ecology<br>Universidade Federal do Rio de Janeiro<br>Brazil                                                                                                |
| Sampaio Rodrigues, Rodrigo<br>Biologist/Botanist<br>Institute of Botany, São Paulo State<br>Brazil                               | Sampedro, Luis<br>Senior Scientist<br>MBG-CSIC, Forestry<br>Spain                                                                                 | Samplonius, Jelmer<br>PhD Biology<br>Netherlands (the)                                                                                                                                                 |
| Samset, Bjorn H.<br>Research Director, Climate Science<br>CICERO Center for International Climate Research<br>Norway             | Samuel, Marshall Kana<br>Scientist<br>Malaysian Agricultural Research and Developemnt<br>Institute (MARDI)<br>Malaysia                            | Samuel-Rosa, Alessandro<br>Postdoctoral researcher<br>Universidade Federal de Santa Maria<br>Brazil                                                                                                    |
| Samways, Michael<br>Distinguished Professor in Conservation Ecology and<br>Entomology<br>Stellenbosch University<br>South Africa | SAN CRISTOBAL, Magali<br>Senior scientist in biostatistics<br>INRA<br>France                                                                      | San Martín Órdenes, Julio Alejandro *<br>Veterinarian U. de Concepción, M.Cs mention Natural<br>Resources U. de Los Lagos, Dr. Vet. Sci. (c) U. de<br>Concepción<br>Universidad de Concepción<br>Chile |
| Sana, Thibault G.<br>PhD in Microbiology<br>Stanford University<br>United States of America (the)                                | Sanaphre, Manuel<br>Software engineer<br>General Electric<br>Mexico                                                                               | Sanaphre Villanueva, Lucía<br>Post Doc in Functional ecology of woody plants<br>National University of Mexico<br>Mexico                                                                                |
| Sanborn, Paul<br>Associate Professor<br>University of Northern British Columbia<br>Canada                                        | Sanches Natumi, Regiane<br>PhD student Environmental Chemistry<br>EAWAG<br>Switzerland                                                            | Sanchez, Adriana<br>Professor<br>Universidad del Rosario, Bogotá<br>Colombia                                                                                                                           |

|                                                                                                                                   |                                                                                                                                                        |                                                                                                                                               |
|-----------------------------------------------------------------------------------------------------------------------------------|--------------------------------------------------------------------------------------------------------------------------------------------------------|-----------------------------------------------------------------------------------------------------------------------------------------------|
| Sanchez, Cecilia<br>PhD Candidate<br>University of Georgia<br>United States of America (the)                                      | Sanchez, Wilfried<br>Ecotoxicology<br>Rovertain Scientific Foundation<br>France                                                                        | Sánchez, Carlos<br>Emeritus Prof.<br>Universidad Autónoma de Madrid<br>Spain                                                                  |
| Sánchez, José M<br>Associate professor<br>Vigo University<br>Spain                                                                | SÁNCHEZ ARTEAGA, JUANMA<br>PROFESSOR<br>FEDERAL UNIVERSITY OF BAHIA (UFBA)<br>Brazil                                                                   | Sánchez Carrillo, Sergio<br>Postgraduate student<br>Universidad Autónoma de Madrid<br>Spain                                                   |
| Sanchez Meseguer, Andrea<br>Postdoctoral researcher<br>Centre national de la recherche scientifique (CNRS)<br>France              | Sánchez Pérez, Rebeca<br>Research Assistand<br>CNIO<br>Spain                                                                                           | Sánchez Villegas, José Alfonso *<br>investigación en Agricultura<br>Centro de Investigación en Alimentación y Desarrollo, A.C.<br>Mexico      |
| Sanchez-Blazquez, Patricia<br>Faculty/ Astrophysics<br>Universidad Autonoma de Madrid<br>Spain                                    | Sánchez-Carrillo, Salvador<br>Senior Research<br>National Museum of Natural Sciencies, Spanish Council<br>for Scientific Research (MNCN-CSIC)<br>Spain | Sanchez-Conde, Miguel<br>Assistant Professor, Astroparticle physics<br>Universidad Autonoma de Madrid<br>Spain                                |
| Sanchez-Donoso, Ines<br>PhD, Evolutionary Biology<br>Spanish Research Council (CSIC), Doñana Biological<br>Station (EBD)<br>Spain | Sánchez-Fernández, David<br>Postdoc researcher<br>University of Castilla-La Mancha<br>Spain                                                            | Sanchez-Flores, Alejandro<br>Staff Scientist<br>Biotechnology Institute - UNAM<br>Mexico                                                      |
| Sanchez-Jardon, Laura<br>PhD in Biology<br>universidad de Magallanes<br>Chile                                                     | Sánchez-Kuntz, Natalia<br>MSc Physics<br>ICN, UNAM<br>Mexico                                                                                           | Sanchez-Lizaso, Jose Luis<br>Professor<br>University of Alicante<br>Spain                                                                     |
| Sánchez-Pérez, Héctor Javier *<br>Titular Researcher, PhD in Medicine (Public Health)<br>El Colegio de la Frontera Sur<br>Mexico  | Sánchez-Rodríguez, Antonio R<br>Postdoctoral Research Officer<br>Bangor University<br>United Kingdom of Great Britain and Northern Ireland<br>(the)    | Sanchez-Salguero, Raul<br>Postdoc in Forest Ecology<br>Pyrenean Institute of Ecology-Spanish National Research<br>Council (IPE-CSIC)<br>Spain |
| Sánchez-Zapata, José Antonio *<br>Profesor Ecology<br>Universidad Miguel Hernández<br>Spain                                       | Sancho, Francisco<br>Researcher<br>National Civil Engineering Laboratory<br>Portugal                                                                   | Sander, Nilo<br>PhD<br>Unemat<br>Brazil                                                                                                       |
| Sander, Rolf<br>Atmospheric Chemistry<br>Max-Planck Institute of Chemistry<br>Germany                                             | Sanders, Ashley D<br>postdoctoral fellow<br>EMBL<br>Germany                                                                                            | Sandfoss, Mark<br>PhD Student<br>University of Florida<br>United States of America (the)                                                      |

|                                                                                                                    |                                                                                                                                                            |                                                                                                                                                                 |
|--------------------------------------------------------------------------------------------------------------------|------------------------------------------------------------------------------------------------------------------------------------------------------------|-----------------------------------------------------------------------------------------------------------------------------------------------------------------|
| Sandgathe, Dennis<br>University Lecturer in Archaeology<br>Simon Fraser University<br>Canada                       | Sándor, Attila D.<br>Researcher<br>University of Agricultural Sciences and Veterinary<br>Medicine, Cluj<br>Romania                                         | Sandoz, Jean-Christophe<br>CNRS Research Director - Evolutionary Neuroethology<br>CNRS<br>France                                                                |
| Sandu, Irina<br>Researcher - Conservation scientist<br>Munch Museum<br>Norway                                      | Sangster, George<br>Postdoc, Bioinformatics and Genetics<br>Swedish Museum of Natural History<br>Sweden                                                    | Sanguet, Arthur<br>PhD<br>France                                                                                                                                |
| Sankovitz, Madison<br>United States of America (the)                                                               | Sannen, Laurien<br>Phd student<br>Ghent University<br>Belgium                                                                                              | Sanseverino, Angela<br>Postdoctoral Researcher in Ecology<br>Federal University of Rio de Janeiro<br>Brazil                                                     |
| Sansevero, Jeronimo<br>Professor of Ecological Restoration<br>Federal Rural University of Rio de Janeiro<br>Brazil | Sansone, Dayan *<br>biologist epidemiologist<br>UNIFESP<br>Brazil                                                                                          | SANT ANNA, PAULO AFRANIO<br>PROFESSOR/ PSICOLOGY<br>UNIVERSIDADE FEDERAL DOS VALES DO JEQUITINHONHA<br>E MUCURI<br>Brazil                                       |
| SANTACRUZ, STALIN<br>RESEARCHER/FOOD SCIENCE<br>UNIVERSIDAD LAICA ELOY ALFARO DE MANABI<br>Ecuador                 | Santacruz-Castro, Adriana<br>Colombia                                                                                                                      | Santamaria, Marjorie<br>Plant genetics<br>Instituto Colombiano Agropecuario<br>Colombia                                                                         |
| Santamaría, Silvia<br>Postdoc / Ecology<br>IMEDEA (CSIC)<br>Spain                                                  | Santamaria Galindo, Maikol<br>Professor<br>Corporación Universitaria Minuto de Dios<br>Colombia                                                            | Santamaria Perez, Jorge<br>PhD in marine ecology. Ecology of invasive algae<br>University of Girona / Blanes Centre for Avanced Studies<br>(CEAB/CSIC)<br>Spain |
| Santana, Flavia<br>PhD candidate<br>Instituto Nacional de Pesquisas da Amazonia - INPA<br>Brazil                   | Santana, William<br>Professor/ President<br>Universidade do Sagrado Coração/ Brazilian<br>Carcinological Society<br>Brazil                                 | SantAnna, Célia<br>Professor<br>Institute of Botany<br>Brazil                                                                                                   |
| Santarém, Frederico<br>PhD student<br>CIBIO/InBIO-UP<br>Portugal                                                   | Santelices, Bernabé<br>Professor of Biology; Phycology and Marine Ecology<br>Facultad de Ciencias Biológicas, P. Universidad Católica<br>de Chile<br>Chile | Santiago, Alejandro<br>Curator<br>Botanical Garden of Castilla-La Mancha<br>Spain                                                                               |

|                                                                                                                                                                                      |                                                                                                                                          |                                                                                                                                                                          |
|--------------------------------------------------------------------------------------------------------------------------------------------------------------------------------------|------------------------------------------------------------------------------------------------------------------------------------------|--------------------------------------------------------------------------------------------------------------------------------------------------------------------------|
| Santiago-Avila, Francisco<br>Environmental Researcher, Large Carnivore Coexistence<br>and Environmental Ethics<br>University of Wisconsin, Madison<br>United States of America (the) | Santin, Cristina<br>Senior lecturer / Biosciences<br>Swansea University<br>United Kingdom of Great Britain and Northern Ireland<br>(the) | Santin, Jaime<br>Assistant Professor<br>Universidad Nacional de Loja<br>Ecuador                                                                                          |
| Santini, Luca<br>Postdoctoral researcher<br>Radboud University<br>Netherlands (the)                                                                                                  | Santo, Andrea<br>PhD, Researcher in Environmental Botany and<br>Conservation Biology<br>University of Cagliari<br>Italy                  | Santorelli Junior, Sergio<br>PhD student in Biological Sciences<br>Instituto Nacional de Pesquisas da Amazônia<br>Brazil                                                 |
| Santos, Aline<br>Mestranda Ciências de Florestas Tropicais<br>Instituto Nacional de Pesquisas da Amazônia<br>Brazil                                                                  | Santos, Aliteia *<br>Private<br>Brazil                                                                                                   | Santos, Amédís Germano<br>Prof. Dr. - Anthropology and Civil Law<br>UFVJM - Universidade Federal dos Vales do<br>Jequitinhonha e Mucuri - Minas Gerais, Brasil<br>Brazil |
| Santos, Ana M. C.<br>Research Fellow<br>Universidad de Alcalá<br>Spain                                                                                                               | Santos, Anna<br>Human Geographer<br>United States of America (the)                                                                       | Santos, Bernardo<br>Postdoctoral fellow, evolutionary biology<br>National Museum of Natural History<br>United States of America (the)                                    |
| Santos, Braulio<br>Assistant professor<br>Universidade Federal da Paraíba<br>Brazil                                                                                                  | Santos, Camilla<br>Brazil                                                                                                                | Santos, Carla<br>Estudante<br>USP<br>Brazil                                                                                                                              |
| Santos, Charles Morphy<br>Assistant Professor IV - Evolutionary Biology<br>Universidade Federal do ABC (UFABC)<br>Brazil                                                             | Santos, Cinthya<br>Master's degree<br>Universidade Estadual de Santa Cruz<br>Brazil                                                      | Santos, Claudino<br>Lawyer<br>Brazil                                                                                                                                     |
| Santos, Daubian<br>Masters by Evolution and Diversity<br>UFABC<br>Brazil                                                                                                             | Santos, Flavio<br>Professor of Plant Ecology<br>Biology Institute, State University of Campinas (UNICAMP)<br>Brazil                      | Santos, Gabriel Zago *<br>Researcher<br>Universidade Federal de São Paulo<br>Brazil                                                                                      |
| Santos, Gabriel Zago *<br>Sustainability researcher<br>UNIFESP - Universidade Federal de São Paulo<br>Brazil                                                                         | Santos, Jean<br>Associate Professor of Ecology<br>Universidade Federal de Uberlândia<br>Brazil                                           | Santos, João Pedro Nascimento<br>Portugal                                                                                                                                |



|                                                                                                                               |                                                                                                                    |                                                                                                                                                             |
|-------------------------------------------------------------------------------------------------------------------------------|--------------------------------------------------------------------------------------------------------------------|-------------------------------------------------------------------------------------------------------------------------------------------------------------|
| Santos, Karin<br>Sweden                                                                                                       | Santos, Nancy<br>Wildlife Biologist<br>NAS Environmental Consulting<br>United States of America (the)              | Santos, Nuno<br>Post-doctoral researcher, conservation medicine and physiology<br>CIBIO - Research Center in Biodiversity and Genetic Resources<br>Portugal |
| Santos, Pedro<br>agronomist<br>Agrodrone<br>Portugal                                                                          | Santos, Robson<br>Associate Professor / Zoology<br>UFAL<br>Brazil                                                  | Santos, Sara Maria<br>Investigator /Biology<br>University of Évora<br>Portugal                                                                              |
| Santos, Thainá Alves<br>Brazil                                                                                                | Santos, Viviane<br>Associated professor/ Organic Chemistry<br>Universidade Federal de Ouro Preto<br>Brazil         | Santos, Xavier<br>Researcher / Ecology<br>CIBIO/InBIO, University of Porto<br>Portugal                                                                      |
| Santos Collier, Leonardo<br>Associate Professor<br>Federal University of Goiás<br>Brazil                                      | Santos Menezes, Bárbara<br>Ph.D. candidate<br>UFSC<br>Brazil                                                       | Santos Pompeu, Paulo<br>Associate Professor - Ecology<br>Federal University of Lavras<br>Brazil                                                             |
| Santos-Granero, Fernando<br>Senior Scientist - Social Anthropology<br>Smithsonian Tropical Research Institute<br>Panama       | Santos-Martin, Fernando<br>Senior reasearcher<br>University of Madrid<br>Spain                                     | Santos-Ocaña, Carlos<br>Associate Profesor of Cell Biology<br>University Pablo de Olavide<br>Spain                                                          |
| Santure, Anna<br>Researcher in evolutionary Biology<br>University of Auckland<br>New Zealand                                  | Sanvicente, Laura<br>Reseracher<br>University of Mexico<br>Mexico                                                  | Sanz, Catalina<br>Proffesor<br>University of Salamanca<br>Spain                                                                                             |
| Sanz, Ferran<br>Director, Research Programme on Biomedical Informatics<br>IMIM - Universitat Pompeu Fabra, Barcelona<br>Spain | Sanz Ros, Antonio Vicente<br>Collaborator Researcher and Plant Pathologist<br>University of Valladolid<br>Spain    | Sanz-Aguilar, Ana<br>Postdoctoral Reseracher, Population Ecoology, Conservation Biology<br>IMEDEA CSIC-UIB<br>Spain                                         |
| São Pedro Abdiel de souza, Marcelle<br>Msc Student<br>National Institute of Amazonian Reserch<br>Brazil                       | Sapdhare, Harsha<br>Research student<br>University of South Australia<br>Australia                                 | Sapinski, JP<br>Post-doctoral Fellow, Department of Sociology<br>University of Victoria<br>Canada                                                           |
| Sapir, Nir<br>Senior lecturer of Evolutionary and Environmental Biology<br>University of Haifa<br>Israel                      | Sapir, Yuval<br>Senior lecturer and director of the botanical garden;<br>Botanist<br>Tel Aviv University<br>Israel | Sapkota, Jeewan<br>M.s.c student<br>T.U<br>Nepal                                                                                                            |

|                                                                                                                                                                                   |                                                                                                                                                                                |                                                                                                                                                         |
|-----------------------------------------------------------------------------------------------------------------------------------------------------------------------------------|--------------------------------------------------------------------------------------------------------------------------------------------------------------------------------|---------------------------------------------------------------------------------------------------------------------------------------------------------|
| Saporito, Dafne<br>PhD Student in Chemistry<br>Universidad Nacional de Córdoba / INFIQC<br>Argentina                                                                              | Sappington, Thomas W.<br>Entomology<br>United States of America (the)                                                                                                          | SARA, LA<br>LECTURER/SENIOR RESEARCHER<br>HALU OLEO UNIVERSITY<br>Indonesia                                                                             |
| Sara, Pardal<br>PhD student in Ecology<br>MARE-Marine and Environmental Sciences Centre,<br>Department of Life Sciences, University of Coimbra, 3000-<br>456 Coimbra<br>Portugal  | Sarabian, Cecile<br>PhD candidate<br>Kyoto University<br>Japan                                                                                                                 | SARAGOUSSI, MURIEL *<br>Grantee<br>Fundação Oswaldo Cruz - FIOCRUZ<br>Brazil                                                                            |
| Sarah, Pariente<br>Prof. Soil Science<br>Bar Ilan University<br>Israel                                                                                                            | Sarasola, José Hernán<br>Researcher<br>Argentinean Research Council (CONICET)- Center for the<br>Study and Conservation of Birds of Prey in Argentina<br>(CECARA)<br>Argentina | saraux, claire<br>Researcher in ecology and fisheries science<br>IFREMER<br>France                                                                      |
| Sarbas, Baerbel<br>Max Planck Institute for Chemistry<br>Germany                                                                                                                  | SARDÁ, RAFAEL<br>SENIOR SCIENTIST<br>CONSEJO SUPERIOR DE INVESTIGACIONES CIENTIFICAS<br>(CSIC)<br>Spain                                                                        | Sardà, Francisco<br>Research Professor in Marine Biology<br>CONSEJO SUPERIOR DE INVESTIGACIONES CIENTIFICAS<br>Spain                                    |
| Sarfati, Diana<br>Professor of Public Health<br>University of Otago<br>New Zealand                                                                                                | Sari, Rismita<br>PhD student in Plant Systematics<br>College of Science and Engineering James Cook University<br>Australia                                                     | Saric, Stella<br>Germany                                                                                                                                |
| Saric, Tomo<br>Group Leader in Stem Cell Research and Regenerative<br>Medicine<br>Center for Physiology and Pathophysiology, Medical<br>Faculty, University of Cologne<br>Germany | Sarkar, Priyanka<br>Doctoral student, UGC-BSR Senior Research Fellow<br>Assam University, Silchar-788011<br>India                                                              | Sarmiento, Carlos E<br>Associate professor, Systematics, Entomology<br>Instituto de Ciencias Naturales, Universidad Nacional de<br>Colombia<br>Colombia |
| Sarmiento, Felipe<br>PhD Microbiology<br>United States of America (the)                                                                                                           | Sarmiento, Jon Marx<br>Assistant Professor<br>University of the Philippines Mindanao<br>Philippines (the)                                                                      | Sarre, Stephen<br>Professor Environmental Genetics and Genomics<br>University of Canberra<br>Australia                                                  |
| SARTHOU, Jean-Pierre<br>Professor of Agronomy-Agroecology<br>University of Toulouse<br>France                                                                                     | Sartori, Ângela *<br>Professor<br>Universidade Federal de Mato Grosso do Sul<br>Brazil                                                                                         | Sartori, Michel<br>PhD, Director<br>Museum of zoology, Lausanne<br>Switzerland                                                                          |

|                                                                                                                                                                                    |                                                                                                                      |                                                                                                                          |
|------------------------------------------------------------------------------------------------------------------------------------------------------------------------------------|----------------------------------------------------------------------------------------------------------------------|--------------------------------------------------------------------------------------------------------------------------|
| Sarvary, Joseph<br>Deputy Director<br>Para La Tierra<br>Paraguay                                                                                                                   | Saslis-Lagoudakis, C. Haris<br>Assistant Professor in Biology<br>University of Copenhagen<br>Denmark                 | SASS, NELSON<br>Vice Dean and Professor at Department of Obstetrics<br>Universidade Federal de São Paulo<br>Brazil       |
| Sassen, Marieke<br>Sr programme officer biodiversity and agriculture<br>UNEP-World Conservation Monitoring Centre<br>United Kingdom of Great Britain and Northern Ireland<br>(the) | Satalaya, Harvey *<br>Biólogo Acuicultor<br>Instituto de Investigaciones de la Amazonía Peruana<br>Peru              | Satish, K V<br>Researcher<br>National Remote Sensing Centre<br>India                                                     |
| Satterfield, Dara<br>Post-doctoral researcher<br>Smithsonian Institution<br>United States of America (the)                                                                         | Satterfield, Terre<br>Professor<br>University of British Columbia<br>Canada                                          | Sauer, Erin<br>PhD Candidate-Integrative Biology<br>University of South Florida<br>United States of America (the)        |
| Sauer, Ursula<br>Scientist<br>AIT Austrian Institute of Technology<br>Austria                                                                                                      | Saul, Wolf-Christian<br>Invasion ecology<br>South Africa                                                             | Saulnier-Talbot, Émilie<br>paleolimnologist/aquatic ecologist<br>Université Laval<br>Canada                              |
| Saunders, Angela<br>Dietitian<br>Australia                                                                                                                                         | Saunders, Denis<br>Retired conservation biologist<br>Australia                                                       | Saunders, Manu<br>Postdoctoral Fellow Ecosystem Services<br>University of New England<br>Australia                       |
| Saunders, Matthew<br>Assistant Professor in Plant Sciences<br>Trinity College Dublin<br>Ireland                                                                                    | Saunders, Megan<br>Senior Research Fellow, Marine environmental science<br>The University of Queensland<br>Australia | sauvage, sabine<br>Research Engineer<br>CNRS<br>France                                                                   |
| Sauvard, Daniel<br>Entomologist<br>(French) Institut national de la recherche agronomique<br>France                                                                                | Sauvé, Lucie<br>Profesor<br>Université du Québec à Montréal<br>Canada                                                | Sauzeau, Vincent *<br>PhD<br>Inserm<br>France                                                                            |
| SAVADOGO, Alpha Mohamed<br>Student/Water and Sanitation Engineering<br>International Institute of Water and Environment<br>Engineering<br>Burkina Faso                             | Savage, Kirstie<br>Graduate Student<br>Northern Illinois University<br>United States of America (the)                | Savary, Romain<br>Ecology and Evolution<br>Department of Ecology and Evolution, University of<br>Lausanne<br>Switzerland |

|                                                                                                                         |                                                                                                                  |                                                                                                                                                                     |
|-------------------------------------------------------------------------------------------------------------------------|------------------------------------------------------------------------------------------------------------------|---------------------------------------------------------------------------------------------------------------------------------------------------------------------|
| Savelli, Raphael<br>PhD student<br>Université de La Rochelle<br>France                                                  | SAVI, Merveille Koissi<br>Junior Researcher<br>Zentrum für Entwicklungsforschung ZEF<br>Benin                    | Saville, Nicola<br>Researcher and Zoologist<br>Environmental Research Institute, University of Belize<br>United Kingdom of Great Britain and Northern Ireland (the) |
| Sawahel, Wagdy<br>Molecular biotechnologist<br>National Research center<br>Egypt                                        | Sawyer, Sara<br>Associate Professor Biology<br>Glenville State College<br>United States of America (the)         | Saxena, Deepak *<br>Professor<br>Indian Institute of Public Health Gandhinagar<br>India                                                                             |
| Sayigh, Laela<br>Visiting Assistant Professor of Animal Behavior<br>Hampshire College<br>United States of America (the) | Sbampato, Maria Esther<br>Research - Spectroscopy<br>Instituto Tecnológico de Aeronáutica - ITA - DCTA<br>Brazil | Sborchia, Mateja<br>PhD Student<br>KCL<br>United Kingdom of Great Britain and Northern Ireland (the)                                                                |
| Scaccini, Davide<br>Entomology<br>Italy                                                                                 | Scacco, Martina<br>PhD Student - Movement Ecology<br>Max Planck Institute for Ornithology<br>Germany             | Scadden, Phillip<br>Senior Scientist, Geoscience<br>Institute of Geological and Nuclear Sciences (GNS)<br>New Zealand                                               |
| Scandura, Massimo<br>Senior Researcher - Zoology<br>University of Sassari<br>Italy                                      | Scanga, Sara<br>Associate Professor of Biology<br>Utica College<br>United States of America (the)                | Scanlon, Annette<br>Lecturer<br>University of South Australia<br>Australia                                                                                          |
| Scanlon, John<br>Research Associate<br>University of New South Wales<br>Australia                                       | scao, vincent<br>Paleoclimatology<br>French Atomic and Alternatives Energies Commission<br>France                | Scaranello Nunes Santana, Danielly<br>Gynecologist and Obstetrician<br>University of Campinas<br>Brazil                                                             |
| Scarinci, Silvana<br>Professor<br>Universidade Federal do Paraná<br>Brazil                                              | Scariot, Aldicir<br>Researcher<br>Embrapa - Brazilian Agriculture Research Corporation<br>Brazil                 | Scarlat, Alexandra<br>Environmental Scientist<br>United Kingdom of Great Britain and Northern Ireland (the)                                                         |
| Scarr, Lowell<br>Researcher in Economics<br>Agricultural Research Council<br>South Africa                               | Schachtschneider, Klaudia<br>Programme Manager: Water Stewardship<br>WWF South Africa<br>South Africa            | Schacter, Carley<br>PhD candidate<br>Memorial University of Newfoundland<br>Canada                                                                                  |

|                                                                                                                |                                                                                                                                                        |                                                                                                                        |
|----------------------------------------------------------------------------------------------------------------|--------------------------------------------------------------------------------------------------------------------------------------------------------|------------------------------------------------------------------------------------------------------------------------|
| Schade, Gunnar<br>Associate Professor<br>Texas A&M University<br>United States of America (the)                | Schaedelin, Franziska C.<br>Post-doc<br>University of Veterinary Medicine Vienna<br>Austria                                                            | Schaefer, Hanno<br>Associate Professor<br>Technical University of Munich, Ecology & Ecosystem<br>Management<br>Germany |
| Schaefer, Hinrich<br>Research Scientist<br>National Institute of Water and Atmospheric Research<br>New Zealand | Schaefer, James<br>Professor<br>Trent University<br>Canada                                                                                             | Schaefer, Ralf<br>Professor<br>University of Koblenz-Landau<br>Germany                                                 |
| Schaeffer, Roberto<br>Full Professor of Energy Economics<br>Universidade Federal do Rio de Janeiro<br>Brazil   | Schaeffer, Stephen<br>Professor of Biology<br>Penn State University<br>United States of America (the)                                                  | Schaeffer-Novelli, Yara<br>Senior Professor<br>University of São Paulo<br>Brazil                                       |
| Schaetzl, Randall<br>Professor of Geography<br>Michigan State University<br>United States of America (the)     | Schäffler, Livia<br>biodiversity conservation<br>Zoological Research Museum Alexander Koenig – Leibniz<br>Institute for Animal Biodiversity<br>Germany | Schägner, Jan Philipp *<br>Scientific Officer<br>European Commission<br>Italy                                          |
| Schall, Peter<br>Senior scientist / Forest ecology<br>University of Goettingen<br>Germany                      | Schaper, Jonas<br>PhD Student / Hydrology<br>IGB Berlin<br>Germany                                                                                     | Schappe, Tyler<br>Graduate Student, Ecology<br>Oregon State University<br>United States of America (the)               |
| Scharf, Anne K.<br>Movement Ecology<br>Max Planck Institute for Ornithology<br>Germany                         | Scharf, Burkhard<br>Limnologist<br>retired<br>Germany                                                                                                  | Scharler, Ursula<br>Associate Professor, Marine Biology<br>University of KwaZulu-Natal<br>South Africa                 |
| Scharnweber, Kristin<br>Aquatic Ecologist<br>Uppsala University<br>Sweden                                      | Schatz, David<br>Professor of Immunobiology<br>Yale School of Medicine<br>United States of America (the)                                               | Schatz, George<br>Curator<br>Missouri Botanical Garden<br>United States of America (the)                               |
| Schaub, Eileen<br>Graduate student in botany<br>University of Connecticut<br>United States of America (the)    | Schebella, Morgan<br>PhD candidate<br>Natural and Built Environments Research Centre -<br>University of South Australia<br>Australia                   | Scheel, Dierk<br>Professor, Department Head, Biology<br>Leibniz Institute of Plant Biochemistry<br>Germany             |
| Scheelen, Lucie<br>Landscape Ecology<br>Universität Göttingen<br>Germany                                       | Scheel-Ybert, Rita<br>Professor, Researcher, Archaeology<br>Universidade Federal do Rio de Janeiro<br>Brazil                                           | Scheffers, Brett<br>Assistant Professor<br>University of Florida<br>United States of America (the)                     |

|                                                                                                                                |                                                                                                                                                                            |                                                                                                                                       |
|--------------------------------------------------------------------------------------------------------------------------------|----------------------------------------------------------------------------------------------------------------------------------------------------------------------------|---------------------------------------------------------------------------------------------------------------------------------------|
| Scheffner, Martin<br>Professor of Biology<br>University of Konstanz<br>Germany                                                 | SCHEIBE, Luiz Fernando<br>Emeritus Professor / Geologist<br>Universidade Federal de Santa Catarina<br>Brazil                                                               | Scheibling, Robert<br>Professor, Marine Ecology<br>Dalhousie University<br>Canada                                                     |
| Scheifler, Renaud<br>Lecturer Stress Ecology<br>University Bourgogne Franche-Comté<br>France                                   | Scheimer, Elizabeth<br>Marine resouces management specialist<br>United States of America (the)                                                                             | Scheimreif, Kayla<br>Graduate Student<br>United States of America (the)                                                               |
| Schell, Christopher<br>Postdoctoral Researcher<br>Colorado State University<br>United States of America (the)                  | Schelsky, Wendy<br>Adjunct Assistant Professor/Biological Surveys Program<br>Leader<br>Prairie Research Institute/University of Illinois<br>United States of America (the) | Schembri, Patrick Joseph<br>Professor of Biology<br>University of Malta<br>Malta                                                      |
| Scheper, Jeroen<br>Ecologist<br>Wageningen University & Research<br>Netherlands (the)                                          | Scherber, Christoph<br>Full Professor<br>University of Muenster<br>Germany                                                                                                 | Scherer, Cedric<br>PhD student<br>Leibniz Institute for Zoo and Wildlife Research<br>Germany                                          |
| Scherer, Jerome<br>Mathematics<br>EPFL<br>Switzerland                                                                          | Scherer, Laura<br>Assistant Professor<br>Leiden University<br>Netherlands (the)                                                                                            | Scherer-Lorenzen, Michael<br>Professor in Biology/Ecology<br>University of Freiburg<br>Germany                                        |
| Scherr, Sara<br>President and CEO<br>EcoAgriculture Partners<br>United States of America (the)                                 | Scheu, Stefan<br>Professor for ecology<br>University Goettingen<br>Germany                                                                                                 | Scheuffele, Hanna<br>Reasearcher/ Ecopsiology<br>Alfred-Wegener- Institute<br>Germany                                                 |
| Schewe, Dr. Ingo<br>Seniour-scientist in deep-sea ecology<br>Alfred Wegener Institute<br>Germany                               | Schiavon, Raquel<br>Student<br>Singular<br>Brazil                                                                                                                          | Schick, Lisa<br>BSc graduate Physics<br>Georg-August-Universität Göttingen<br>Germany                                                 |
| Schick, Thomas *<br>Professor of Mathematics<br>Universität Göttingen<br>Germany                                               | Schiele, Kerstin<br>Dr.<br>Germany                                                                                                                                         | Schiffman, Paula<br>Professor of Biology (plant ecology)<br>California State University, Northridge<br>United States of America (the) |
| Schild, Johanna<br>Researcher in ecology<br>Institute of Environmental Sciences CML, Leiden<br>University<br>Netherlands (the) | Schiller, Johannes<br>Senior Researcher<br>Helmholtz Centre for Environmental Research GmbH -<br>UFZ<br>Germany                                                            | Schiller, Sabine<br>Technical Assistant<br>Leibniz Institut for Zoo- and Wildlife Research<br>Germany                                 |

|                                                                                                                                                                       |                                                                                                                                               |                                                                                                                                           |
|-----------------------------------------------------------------------------------------------------------------------------------------------------------------------|-----------------------------------------------------------------------------------------------------------------------------------------------|-------------------------------------------------------------------------------------------------------------------------------------------|
| Schils, Tom<br>Associate Professor<br>University of Guam<br>Guam                                                                                                      | Schilthuizen, Menno<br>professor of evolution and biodiversity<br>Naturalis Biodiversity Center<br>Netherlands (the)                          | Schimmel, Samantha<br>Nature conservation graduate<br>Nelson Mandela University<br>South Africa                                           |
| Schimschal, Claudia Monika<br>PhD Student<br>Alfred Wegener Institute, Helmholtz Centre for Polar and<br>Marine Research<br>Germany                                   | Schindler, David *<br>Killam Memorial Professor of Ecology Emeritus<br>University of Alberta<br>Canada                                        | Schipp, Mark<br>Chief Veterinary Officer<br>Australia                                                                                     |
| Schirmel, Jens<br>Researcher / Ecology<br>University of Koblenz-Landau, Institute for Environmental<br>Sciences<br>Germany                                            | Schirmer, Anke<br>Scientific project manager<br>Leibniz Institute for Zoo and Wildlife Research Berlin<br>Germany                             | Schläpfer, Nina<br>Switzerland                                                                                                            |
| Schläppy, Marie-Lise<br>Researcher associate, marine ecology<br>Ocean Institute, University of Western Australia<br>Australia                                         | Schlatter, Sophie<br>Behavioural ecology<br>Centre for evolutionary biology<br>Australia                                                      | Schleicher, Judith<br>Department of Geography<br>University of Cambridge<br>United Kingdom of Great Britain and Northern Ireland<br>(the) |
| Schlesinger, Matthew<br>Chief Zoologist<br>New York Natural Heritage Program, SUNY College of<br>Environmental Science and Forestry<br>United States of America (the) | Schlichting, Carl<br>Professor & Head, Dept. of Ecology & Evolutionary Biology<br>University of Connecticut<br>United States of America (the) | Schlining, Brian<br>Software Engineer/Oceanographer<br>United States of America (the)                                                     |
| Schlöter, Eva<br>Dipl. Biologist<br>Germany                                                                                                                           | SCHLOTTMANN, CHRISTOPHER<br>Clinical Associate Professor, Environmental Studies<br>New York University<br>United States of America (the)      | Schlupp, Ingo<br>Professor of Biology<br>University of Oklahoma<br>United States of America (the)                                         |
| Schlüter, Philipp<br>Evolutionary Biology<br>University of Zurich<br>Switzerland                                                                                      | Schmeller, Dirk<br>Senior Researcher<br>Helmholtz-Centre for Environmental Research - UFZ<br>Germany                                          | Schmelzle, Sebastian<br>Research assistant in Biology<br>Technische Universität Darmstadt<br>Germany                                      |
| Schmid, Jochen<br>Group Leader, Biobased Polymers<br>Chair of Chemistry of Biogenic Resources, Technical<br>University of Munich<br>Germany                           | Schmidt, Benedikt R.<br>Info Species KARCH<br>Switzerland                                                                                     | Schmidt, Brian<br>Vice Chancellor and Astrophysicist<br>Australian National University<br>Australia                                       |
| Schmidt, Eva-Maria<br>UNIVERSITY OF VIENNA<br>Austria                                                                                                                 | Schmidt, Hella<br>PhD microbiology<br>Germany                                                                                                 | Schmidt, Katrin<br>PhD, Freshwater Ecology<br>Germany                                                                                     |

|                                                                                                                                              |                                                                                                                                |                                                                                                                           |
|----------------------------------------------------------------------------------------------------------------------------------------------|--------------------------------------------------------------------------------------------------------------------------------|---------------------------------------------------------------------------------------------------------------------------|
| Schmidt, Krzysztof<br>associate professor/biology<br>Mammal Research Institute Polish Academy of Sciences<br>Poland                          | Schmidt, Lena Katharina<br>Geoecologist<br>University of Potsdam,Germany<br>Germany                                            | Schmidt, Luciana<br>Researcher, Chemistry<br>UNC<br>Argentina                                                             |
| Schmidt, Patrick<br>Ruminant nutrition<br>Universidade Federal do Paraná<br>Brazil                                                           | Schmidt, Sebastian<br>Microbiology<br>European Molecular Biology Laboratory<br>Germany                                         | Schmidt, Stephen J.<br>Professor of Economics<br>Union College (NY)<br>United States of America (the)                     |
| Schmidt, Susanne<br>Germany                                                                                                                  | Schmidt, Tamara<br>Conservation Biologist<br>Argentina                                                                         | Schmieder, Daniela<br>Assistant<br>Science Faculty at University of Bern<br>Switzerland                                   |
| Schmithüsen, Holger<br>Polar Atmospheric Science<br>Alfred Wegener Institute, Helmholtz Centre for Polar und<br>Marine Research<br>Germany   | Schmitt, Christopher<br>Assistant Professor of Anthropology and Biology<br>Boston University<br>United States of America (the) | Schmitt, Michael<br>retired professor, zoology<br>Ernst-Moritz-Arndt-Universität Greifswald<br>Germany                    |
| Schmitter-Soto, Juan J<br>Biologist<br>El Colegio de la Frontera Sur<br>Mexico                                                               | Schmoll, Monika<br>Senior Scientist<br>AIT Austrian Institute of Technology GmbH<br>Austria                                    | Schnabel, Kareen<br>Marine Biologist<br>National Institute of Water & Atmospheric Research<br>New Zealand                 |
| Schnack, Dietrich<br>Professor emeritus, Fishery Biology<br>Germany                                                                          | Schneid Neutzling, Alexandre<br>Ecology<br>Brazil                                                                              | Schneider, Christine<br>Assistant Professor<br>Carroll university<br>United States of America (the)                       |
| Schneider, Florian D.<br>Postdoctoral Researcher in Biodiversity Science<br>Senckenberg Biodiversity and Climate Research Center<br>Germany  | Schneider, Johannes<br>Senior scientist, atmospheric chemistry<br>Max Planck Institute for Chemistry<br>Germany                | Schneider, Julia<br>Geography<br>University Koblenz-Landau<br>Germany                                                     |
| Schneider, Marielle *<br>Teacher / Genetics and Evolution<br>Universidade Federal de São Paulo<br>Brazil                                     | Schneider, Marion<br>Postdoctoral Fellow in Immunology<br>University of Otago<br>New Zealand                                   | Schneider, Tilman<br>Germany                                                                                              |
| Schneider, Toni<br>Biologist and Professor of Physiology and Biochemistry<br>University of Cologne, Institute for Neurophysiology<br>Germany | Schneider, Walter<br>Germany                                                                                                   | Schneider-Maunoury, Laure<br>PhD student in Evolutionary Ecology<br>Muséum national d'Histoire naturelle, Paris<br>France |



|                                                                                                                                                         |                                                                                                                                                                              |                                                                                                                           |
|---------------------------------------------------------------------------------------------------------------------------------------------------------|------------------------------------------------------------------------------------------------------------------------------------------------------------------------------|---------------------------------------------------------------------------------------------------------------------------|
| Schnell, Jessica<br>Lecturer<br>New Jersey Institute of Technology<br>United States of America (the)                                                    | Schneller, Mirjam<br>PostDoc/PlasmaPhysics (NuclearFusion)<br>Princeton Plasma Physics Laboratory<br>United States of America (the)                                          | Schnitzler, Franz-Rudolf<br>Research Associate/Entomologist<br>Landcare Research NZ/Independent Researcher<br>New Zealand |
| Schnitzler, Jan<br>Research associate, Biology<br>Leipzig University<br>Germany                                                                         | Schnorr, Samuel<br>Phd student in Science Education<br>University of São Paulo<br>Brazil                                                                                     | Schnyder, Cédric<br>Geologist<br>Natural Museum of Geneva<br>Switzerland                                                  |
| Schoderer, Mirja<br>PhD Researcher on Water Governance<br>German Development Institute / Deutsches Institut für<br>Entwicklungspolitik (DIE)<br>Germany | Schoeneborn, Dennis<br>Professor of Organization, Communication & CSR<br>Copenhagen Business School<br>Denmark                                                               | Schoenell, William<br>Pos-doc<br>IAG/USP<br>Brazil                                                                        |
| Schoenenberger, Nicola<br>PhD Biology<br>INNOVABRIDGE Foundation<br>Switzerland                                                                         | Schoenenberger, Rene<br>Chemist<br>Eawag<br>Switzerland                                                                                                                      | Schoenenberger, Ursula<br>Technician<br>Eawag<br>Switzerland                                                              |
| Schoening, Timm<br>PostDoc in Underwater Computer Vision<br>GEOMAR Helmholtz Center for Ocean Research Kiel<br>Germany                                  | Schoenle, Alexandra<br>PhD student<br>General Ecology, Zoological Institute, University of<br>Cologne<br>Germany                                                             | Schoenle, Laura<br>PhD, Biological Sciences<br>Virginia Tech<br>United States of America (the)                            |
| Scholl, Michael<br>CEO<br>Save Our Seas Foundation (SOSF)<br>Switzerland                                                                                | Schön, Isa<br>Senior scientist, Biology<br>Royal Belgian Institute of Natural Sciences<br>Belgium                                                                            | Schön, Jana<br>Ecologist<br>Germany                                                                                       |
| Schönberg, Christine<br>Marine benthic ecologist<br>University of Western Australia<br>Australia                                                        | Schondube, Jorge E.<br>Full Profesor<br>Instituto de Investigaciones en Ecosistemas y<br>Sustentabilidad (IIES), Universidad Nacional Autónoma de<br>México (UNAM)<br>Mexico | Schönenberger, Jürg<br>Professor, Botany<br>University of Vienna<br>Austria                                               |
| Schöner, Michael Gerhard<br>PostDoc<br>University of Greifswald<br>Germany                                                                              | Schönewald, Florian<br>Student of Physics<br>Georg-August-Universität Göttingen<br>Germany                                                                                   | Schöngart, Jochen<br>Associated Scientist<br>National Institute for Amazonian Research<br>Brazil                          |
| Schönwetter, Thomas<br>Environmental Geography Student<br>University of Bayreuth<br>Germany                                                             | Schoof, Justin<br>Professor, Geography and Environmental Resources<br>Southern Illinois University<br>United States of America (the)                                         | Schooley, Sean<br>Medical Student<br>University of Colorado - Anschutz Medical Campus<br>United States of America (the)   |

|                                                                                                                      |                                                                                                                                       |                                                                                                                                                                   |
|----------------------------------------------------------------------------------------------------------------------|---------------------------------------------------------------------------------------------------------------------------------------|-------------------------------------------------------------------------------------------------------------------------------------------------------------------|
| Schoonvaere, Karel<br>Academic researcher<br>Ghent University<br>Belgium                                             | schor, paulo<br>chair - department of ophthalmology and visual sciences<br>unifesp<br>Brazil                                          | Schoville, Sean<br>Assistant Professor, Department of Entomology<br>University of Wisconsin-Madison<br>United States of America (the)                             |
| Schowaneck, Simon D.<br>PhD Student<br>Department of Bioscience, Aarhus University<br>Denmark                        | Schrallhammer, Martina<br>Juniorprofessor<br>University of Freiburg<br>Germany                                                        | Schrama, Maarten<br>Post-doc in Ecology, Ecosystems and Environmental<br>Sciences<br>Institute for Environmental Sciences, Leiden University<br>Netherlands (the) |
| Schramski, John<br>Associate Professor<br>University of Georgia<br>United States of America (the)                    | Schreiber, Elizabeth A.<br>Ornithologist<br>Los Angeles County Museum of Natural History<br>United States of America (the)            | Schreier, Amy<br>United States of America (the)                                                                                                                   |
| Schrieber, Karin<br>Postdoctoral Researcher<br>Department of Chemical Ecology, Bielefeld University<br>Germany       | Schriewer, Lawrence<br>So2ecial Events<br>Cosmotropical<br>United States of America (the)                                             | Schrijvers-Gonlag, Marcel<br>PhD student<br>Inland Norway University of Applied Sciences<br>Norway                                                                |
| Schrock, John Richard<br>Professor of Biology Emeritus<br>Emporia State University<br>United States of America (the) | Schroedl, Michael<br>Museum Curator and Professor<br>ZSM and LMU Munich<br>Germany                                                    | Schroer, Sibylle<br>Germany                                                                                                                                       |
| Schröter, Matthias<br>Postdoctoral Researcher<br>UFZ - Helmholtz Centre for Environmental Research<br>Germany        | Schtickzelle, Nicolas<br>Professor of Quantitative Ecology and Conservation<br>Biology<br>Université catholique de Louvain<br>Belgium | Schubert, Nadine<br>Biological Oceanography/Marine Ecology<br>Universidade Federal de Santa Catarina<br>Brazil                                                    |
| Schubert, Philipp<br>Marine Biologist<br>Helmholtz Center for Ocean Research Kiel GEOMAR<br>Germany                  | Schuch, Viviane<br>Doctor, Epigenetic<br>UNIFESP<br>Brazil                                                                            | Schuchert, Peter<br>Zoologist / marine invertebrates<br>Natural History Museum of Geneva<br>Switzerland                                                           |
| schueler, frederick<br>Research Curator<br>Fragile Inheritance Natural History<br>Canada                             | Schueller, Teresa<br>Assistant Professor of Biology<br>University of Wisconsin-Waukesha<br>United States of America (the)             | Schuette, Kai<br>research scientist<br>University of Hamburg<br>Germany                                                                                           |

|                                                                                                                                                               |                                                                                                                                                      |                                                                                                                                   |
|---------------------------------------------------------------------------------------------------------------------------------------------------------------|------------------------------------------------------------------------------------------------------------------------------------------------------|-----------------------------------------------------------------------------------------------------------------------------------|
| Schuette, Paul<br>Research Assistant Professor<br>Alaska Center for Conservation Science, University of<br>Alaska Anchorage<br>United States of America (the) | Schuetz, Dolores<br>Doctor of Biology, Ecology<br>University of Bern<br>Switzerland                                                                  | Schuetze, Christy<br>Associate Professor of Anthropology<br>Swarthmore College<br>United States of America (the)                  |
| Schull, Quentin<br>PhD in Ecophysiology<br>France                                                                                                             | Schulte, Patricia<br>Professor<br>University of British Columbia<br>Canada                                                                           | Schulte, Paul<br>Associate Professor of biology<br>University of Nevada, Las Vegas<br>United States of America (the)              |
| Schultz, Gillian<br>Professor of Biology<br>Foothill College<br>United States of America (the)                                                                | Schulwitz, Sarah<br>Director of the American Kestrel Partnership<br>The Peregrine Fund<br>United States of America (the)                             | Schulz, Karsten<br>Postdoctoral Researcher (Political Science)<br>Governance & Sustainability Lab, University of Trier<br>Germany |
| Schulz, Michael<br>Senior Researcher<br>Norwegian Meteorological Institute<br>Norway                                                                          | Schulz, Sam<br>Lecturer, Sociology of Education<br>Flinders University<br>Australia                                                                  | Schulze, Christian<br>Assistant Professor<br>Dept. Botany and Biodiversity Research, University of<br>Vienna<br>Austria           |
| Schulze, Mark<br>Director, H.J. Andrews Experimental Forest<br>Oregon State University<br>United States of America (the)                                      | Schumacher, Anna<br>Nature Conservation<br>Germany                                                                                                   | schumann, canan<br>Research Scientist<br>Oregon State University<br>United States of America (the)                                |
| Schumann, Russell<br>Adjunct Senior Research Fellow/Chemistry<br>University of South Australia<br>Australia                                                   | Schuster, Guenter<br>Aquatic Zoologist/Naturalist<br>Eastern Kentucky University<br>United States of America (the)                                   | Schuster, Martin<br>Associate Professor of Microbiology<br>Oregon State University<br>United States of America (the)              |
| Schuster, Richard<br>Liber Ero Postdoctoral Fellow<br>Carleton University<br>Canada                                                                           | Schuttler, Stephanie<br>Research Associate<br>NC Museum of Natural Sciences<br>United States of America (the)                                        | Schüttler, Elke<br>Conservation Biology<br>Universidad de Magallanes<br>Chile                                                     |
| Schutzer, David L. *<br>Professor of Anthropology Emeritus<br>Pierce College<br>United States of America (the)                                                | Schuyler, Qamar<br>Research Scientist, Marine Debris<br>CSIRO<br>Australia                                                                           | Schvarcz, Christopher<br>PhD Student, Oceanography<br>University of Hawaii at Manoa<br>United States of America (the)             |
| Schwab-McCoy, Aimee<br>Assistant Professor/Statistics<br>Creighton University<br>United States of America (the)                                               | Schwan, Melissa<br>Research Technician in Dendroecology<br>Laboratory of Tree-Ring Research, University of Arizona<br>United States of America (the) | Schwander, Tanja<br>PI Evolutionary Biology<br>University of Lausanne<br>Switzerland                                              |

|                                                                                                                                                        |                                                                                                                                          |                                                                                                                                            |
|--------------------------------------------------------------------------------------------------------------------------------------------------------|------------------------------------------------------------------------------------------------------------------------------------------|--------------------------------------------------------------------------------------------------------------------------------------------|
| Schwartz, Joshua<br>Professor of Biology<br>Pace University<br>United States of America (the)                                                          | Schwartz, Mark<br>Professor<br>University of California, Davis<br>United States of America (the)                                         | Schwarz, Carl Michael<br>Engineer<br>University of Oldenburg<br>Germany                                                                    |
| Schwarz, Jana<br>Program coordinator, Division of Soil and Water<br>Management<br>KU Leuven<br>Belgium                                                 | Schwarz, Michael<br>Associate Professor, Evolutionary Biology<br>Flinders University<br>Australia                                        | Schwarz, Rachel<br>PhD student<br>tel Aviv University<br>Israel                                                                            |
| Schwarz Meyer, Andreas Luiz<br>Ecology and Evolutionary Biology<br>Universidade Federal do Paraná<br>Brazil                                            | Schwarzbach, Steven<br>Ecologist<br>USGS, retired<br>United States of America (the)                                                      | Schwarzer, Maud<br>Lab Technician (Chemistry)<br>Germany                                                                                   |
| Schwarzer, Wibke<br>Scientist - molecular biology<br>EMBL<br>Germany                                                                                   | Schweiger, Andreas<br>Postdoc, Ecology<br>Department of Bioscience, Aarhus University<br>Denmark                                         | Schweiger, Oliver<br>Germany                                                                                                               |
| Schweikert, Katja<br>Professional Practice Fellow<br>University of Otago<br>New Zealand                                                                | Schweitzer, Jennifer<br>Associate Professor, Ecology & Evolutionary Biology<br>University of Tennessee<br>United States of America (the) | Schweizer, Daniella<br>Environmental consultant<br>Brazil                                                                                  |
| Schwerdhelm, Sonja<br>MSc Student Geosciences/Research Assistent Glaciology<br>University of Bremen/Alfred-Wegener-Institute<br>Bremerhaven<br>Germany | Schwieder, Marcel<br>Phd Student / Geography<br>Humboldt-Universität zu Berlin<br>Germany                                                | Schwitalla, Jan Wolfgang<br>Master's Student, Microbiology<br>Institute for Microbiology, Friedrich Schiller University<br>Jena<br>Germany |
| Sciacaluga, Giovanni<br>PhD Candidate<br>University of Genoa<br>Italy                                                                                  | Sciaini, Marco<br>PhD Student<br>University of Göttingen<br>Germany                                                                      | Scilla, Jack<br>United States of America (the)                                                                                             |
| Scillitani, Giovanni<br>Aggregate professor, Comparative Anatomy<br>University Aldo Moro Bari<br>Italy                                                 | Sciuto, Francesco<br>Researcher<br>University of Catania<br>Italy                                                                        | sclater, john *<br>Emeritus Professor<br>UCSD<br>United States of America (the)                                                            |
| Scott, Anna<br>Lecturer<br>Southern Cross University<br>Australia                                                                                      | Scott, Catherine<br>PhD Student in Ecology and Evolutionary Biology<br>University of Toronto<br>Canada                                   | Scott, Dawn<br>Principal Lecturer in Ecology<br>University of Brighton<br>United Kingdom of Great Britain and Northern Ireland<br>(the)    |

|                                                                                                                       |                                                                                                                                   |                                                                                                                           |
|-----------------------------------------------------------------------------------------------------------------------|-----------------------------------------------------------------------------------------------------------------------------------|---------------------------------------------------------------------------------------------------------------------------|
| Scott, Graham<br>Assistant Professor of Biology<br>McMaster University<br>Canada                                      | Scott, Kathleen<br>Associate Professor<br>University of South Florida<br>United States of America (the)                           | Scott, Michelle<br>Professor Emerita<br>University of New Hampshire<br>United States of America (the)                     |
| Scott, Molly<br>PhD student, marine biology<br>James Cook University<br>Australia                                     | Scott, Shaunna<br>Associate Professor, Sociology<br>University of Kentucky<br>United States of America (the)                      | Scott, Shelby<br>Ecology and Evolutionary Biology<br>University of Tennessee, Knoxville<br>United States of America (the) |
| Scotti, Alberto<br>PhD Student<br>Eurac Research, Institute for Alpine Environment<br>Italy                           | Scotti, Ivan<br>Senior Scientist, evolutionary biology and forest genetics<br>INRA<br>France                                      | Scoville, Caleb<br>Graduate Student<br>University of California, Berkeley<br>United States of America (the)               |
| Scow, Kate<br>Professor<br>University of California, Davis<br>United States of America (the)                          | Scucato, Thailine *<br>Brazil                                                                                                     | Scullion, Jason<br>Assistant Professor of Environmental Studies<br>McDaniel College<br>United States of America (the)     |
| Seabra, Sofia<br>Post-Doc Biology<br>Lisbon<br>Portugal                                                               | Seabrook, Leonie<br>Honorary Research Fellow<br>The University of Queensland<br>Australia                                         | Seah, Samantha<br>PhD student, Biology<br>EMBL Heidelberg<br>Germany                                                      |
| Sealing, Mary<br>United States of America (the)                                                                       | Seastedt, Tim<br>Professor, Ecology and Evolutionary Biology<br>University of Colorado, Boulder<br>United States of America (the) | Sebastian, Jis<br>Research Fellow<br>Sacred Heart College<br>India                                                        |
| Sebastián García, Rodrigo<br>Biologist<br>Spain                                                                       | Sebastián-González, Esther<br>Postdoc<br>Universidad Miguel Hernández<br>Spain                                                    | Sébastien, Petit<br>Research assistant<br>UCL<br>Belgium                                                                  |
| Sebbenn, Alexandre *<br>Professor/Population genetics of tropical trees<br>Instituto Florestal de Sao Paulo<br>Brazil | Sebesta, Nicole<br>PhD Student, Biology<br>Florida International University<br>United States of America (the)                     | Sechi, Pierfrancesco<br>Molecular ecology<br>Cardiff University<br>Italy                                                  |
| Sechler, Brian<br>Masters Student - Restoration Ecology<br>CU Boulder<br>United States of America (the)               | Sechrest, Weston<br>Chief Scientist and CEO<br>Global Wildlife Conservation<br>United States of America (the)                     | Secondi, Jean<br>Assistant Professor<br>Université d'Angers<br>France                                                     |

|                                                                                                                                                                                                              |                                                                                                                                                               |                                                                                                                                                        |
|--------------------------------------------------------------------------------------------------------------------------------------------------------------------------------------------------------------|---------------------------------------------------------------------------------------------------------------------------------------------------------------|--------------------------------------------------------------------------------------------------------------------------------------------------------|
| Seddon, James<br>Clinical Lecturer in Paediatric Infectious Diseases<br>Imperial College London<br>United Kingdom of Great Britain and Northern Ireland<br>(the)                                             | Sedell, Edwin<br>Fisheries Ecologist<br>Oregon Department of Fish and Wildlife<br>United States of America (the)                                              | Seebens, Hanno<br>PostDoc<br>Senckenberg Biodiversity and Climate Research Centre<br>Germany                                                           |
| Seedat, Mohamed<br>MSc Student<br>University of Pretoria<br>South Africa                                                                                                                                     | Seeley, Robin Hadlock<br>Senior Research Associate<br>Department of Ecology and Evolutionary Biology, Cornell<br>University<br>United States of America (the) | Seewagen, Chad<br>Ecologist<br>Great Hollow Nature Preserve & Ecological Research<br>Center<br>United States of America (the)                          |
| Sefton, Maggie<br>PhD candidate in biology<br>Universität Konstanz<br>Germany                                                                                                                                | Segelbacher, Gernot<br>conservation genetics<br>university freiburg<br>Germany                                                                                | Segelken-Voigt, Alexandra<br>PhD Student at the Institute for Biology and<br>Environmental Science<br>University of Oldenburg<br>Germany               |
| Segers, Hendrik<br>Biodiversity science and policy expert<br>Royal Belgian Institute of Natural Sciences<br>Belgium                                                                                          | Segers, Philippe *<br>Head of European HPC projects, former Numerical<br>Weather modeler<br>GENCI<br>France                                                   | Segner, Helmut<br>Professor, Veterinray Sciences<br>University of Bern<br>Switzerland                                                                  |
| Segnon, Alcade C.<br>PhD Candidate & Resaerch Assistant<br>Institute for Environment and Sanitation Studies,<br>University of Ghana & Faculty of Agronomic Sciences,<br>University of Abomey-Calavi<br>Benin | Segovia, Edith<br>Research<br>Universidad Nacional de Asunción<br>Paraguay                                                                                    | Segovia, Lorenzo<br>Principal Investigator Protein engineering/Bioinformatics<br>Instituto de Biotecnología UNAM<br>Mexico                             |
| Segovia-Salcedo, Maria Claudia<br>Associate Professor Conservation Genetics<br>Universidad de las Fuerzas Armadas ESPE<br>Ecuador                                                                            | Séguret, Alice<br>PhD candidate, evolutionary biology<br>Martin Luther University (Halle-Wittenberg)<br>Germany                                               | Sehdev, Aarti<br>PhD candidate in Neurobiology<br>University of Konstanz, International Max Planck<br>Research School of Organismal Biology<br>Germany |
| SEHOUNKPINDO GASTON, AKOUEHOU<br>chercheur<br>Centre de Recherche au Ministere du CADRE de Vie<br>Benin                                                                                                      | Seibold, Sebastian<br>Postdoc<br>Technical University of Munich, Terrestrial Ecology<br>Research Group<br>Germany                                             | Seid, Charlotte<br>Museum Scientist<br>Scripps Institution of Oceanography<br>United States of America (the)                                           |
| Seidel, Deike<br>PHD Student<br>Faculty of Medicine Carl Gustav Carus, TU Dresden<br>Germany                                                                                                                 | Seidel, Dominik<br>Junior Research Group Leader; Silviculture of the<br>temperate Zones<br>University of Göttingen<br>Germany                                 | Seiffert, Andrey<br>PhD Candidate in Social History<br>USP<br>Brazil                                                                                   |

|                                                                                                                                                                       |                                                                                                                                                              |                                                                                                                                                             |
|-----------------------------------------------------------------------------------------------------------------------------------------------------------------------|--------------------------------------------------------------------------------------------------------------------------------------------------------------|-------------------------------------------------------------------------------------------------------------------------------------------------------------|
| Seijmonsbergen, Harry<br>Assistant Professor - Theoretical and Computational Ecology<br>Institute for Biodiversity and Ecosystem Dynamics (IBED)<br>Netherlands (the) | Seiler, Caitlin<br>MS Environmental Science, Director of Volunteer and Land Resources<br>Allegheny Land Trust<br>United States of America (the)              | Seine, Thomas<br>Researcher - Biophysics<br>University of Hamburg<br>Germany                                                                                |
| Seipp, Jendrik<br>University of Basel<br>Switzerland                                                                                                                  | Seitz, Jason<br>Senior Biologist & Project Manager<br>ANAMAR Environmental Consulting, Inc.<br>United States of America (the)                                | sekar, sudharshan<br>Post doc<br>University Of Johannesburg, Center for Ecological Genomics & Wild Life conservation, Department Of Zoology<br>South Africa |
| Sekercioglu, Cagan Hakki<br>Associate Professor<br>University of Utah<br>United States of America (the)                                                               | Selbach Hofmann, Gabriel<br>Professor and researcher in ecology and climate<br>Universidade La Salle and Universidade Federal do Rio Grande do Sul<br>Brazil | Selbin, Eric<br>Professor of Political Science & Holder of the L.K. Brown Chair<br>Southwestern University<br>United States of America (the)                |
| Selker, John<br>Distinguished Professor<br>Oregon State Univeristy<br>United States of America (the)                                                                  | Sellami, Haykel<br>Associate Professor<br>Centre for Water Research and Technology<br>Tunisia                                                                | Selling, Joern<br>Biologist<br>firmm.org<br>Spain                                                                                                           |
| Selman, Moisés *<br>Investigador Emérito<br>Instituto Nacional de Enfermedades Respiratorias<br>Mexico                                                                | Seltmann, Anne<br>Postdoc biologist<br>Leibniz Institute for Zoo and wildlife research<br>Germany                                                            | Seltmann, Susanne<br>Postdoctoral researcher, Neuroethology<br>Germany                                                                                      |
| Selva, Nuria<br>Associate Professor, ecologist and conservation biologist<br>Institute of Nature Conservation, Polish Academy of Sciences<br>Poland                   | Selwyn, Jason<br>PhD Candidate<br>Texas A&M University - Corpus Christi<br>United States of America (the)                                                    | Semaan, Myrna<br>Associate Professor<br>Lebanese American University<br>Lebanon                                                                             |
| Semchenko, Marina<br>Research Fellow<br>University of Manchester<br>United Kingdom of Great Britain and Northern Ireland (the)                                        | Semedo, Thiago<br>Universidade Federal de Mato Grosso<br>Brazil                                                                                              | Semensatto Junior, Décio Luis<br>Adjunct Professor / Environmental Sciences<br>Universidade Federal de São Paulo<br>Brazil                                  |
| Sempere, Richard<br>Director of Mediterranean Institute of Oceanography (MIO)<br>CNRS<br>France                                                                       | Semper-Pascual, Asunción<br>PhD Student - Ecology/Conservation Biology<br>Humboldt Universitat zu Berlin<br>Germany                                          | Sen, Pragnyadipta<br>Lecturer<br>University of Virginia<br>United States of America (the)                                                                   |

|                                                                                                                                       |                                                                                                                                               |                                                                                                                   |
|---------------------------------------------------------------------------------------------------------------------------------------|-----------------------------------------------------------------------------------------------------------------------------------------------|-------------------------------------------------------------------------------------------------------------------|
| Sena, Elisa T.<br>Post-Doctorate Fellow<br>University of Sao Paulo<br>Brazil                                                          | SENA ALFAIA, SONIA<br>Research<br>Instituto Nacional de Pesquisas da Amazônia<br>Brazil                                                       | Senay, Senait<br>Researcher, Ecological Informatics<br>University of Minnesota<br>United States of America (the)  |
| Senbeta, Feyera<br>Ecology<br>Addis Ababa University<br>Ethiopia                                                                      | Senbill, Haytham<br>Entomology<br>Alexandria University<br>Egypt                                                                              | Sendra, Alberto<br>Professor associate<br>Valencia university<br>Spain                                            |
| Sendzimir, Jan<br>Senior Scientist / Systems Ecology<br>University of Natural Resources and Applied Life Sciences<br>Austria          | Senf, Cornelius<br>PostDoc in Geography<br>Humboldt-University of Berlin<br>Germany                                                           | Sengenès, Bénédicte<br>Music teacher/educational sciences<br>Paris 8/Éducation nationale<br>France                |
| Sengupta, Chandreyi<br>Research Scholar<br>Jadavpur University<br>India                                                               | Senior, Nicola<br>Post-doctoral microbiology researcher<br>University of Exeter<br>United Kingdom of Great Britain and Northern Ireland (the) | Senko, Dr. Jesse<br>Postdoctoral Research Associate<br>Arizona State University<br>United States of America (the) |
| Senna, Juliano<br>Professor at Geotechnology<br>UFVJM<br>Brazil                                                                       | Senner, Nathan<br>Post-Doctoral Fellow<br>University of Montana<br>United States of America (the)                                             | Senzano Castro, Luis Miguel<br>Biologist - Herpetologist<br>São Paulo State University<br>Brazil                  |
| Seoane, José Carlos<br>Associate Professor<br>Universidade Federal do Rio de Janeiro<br>Brazil                                        | Seong, Jihye<br>Ph.D student<br>University at Buffalo<br>Korea (the Republic of)                                                              | Seppelt, Ralf<br>Professor for Landscape Ecology<br>Helmholtz Centre für Environmental Research<br>Germany        |
| Seppey, Mathieu<br>PhD student, Genomics<br>University of Geneva<br>Switzerland                                                       | Sepulveda, Maritza<br>Academic<br>University of Valparaiso<br>Chile                                                                           | Sepúlveda, Cristian<br>Engineering in Renewable Natural Resources<br>Andean Cat Alliance<br>Chile                 |
| Sepúlveda, Graciela *<br>Biólogo marino<br>Chile                                                                                      | Sequeira, Miguel<br>Prof. Aux.<br>Madeira University<br>Portugal                                                                              | SERALINI, Gilles-Eric<br>Professor of Molecular Biology and Toxicology<br>University of Caen<br>France            |
| Seraphim, Noemy<br>Professor of Biology, PhD in Ecology<br>Instituto Federal de Educação, Ciência e Tecnologia de São Paulo<br>Brazil | Serb, Jeanne<br>Associate Professor, Evolutionary Biologist<br>Iowa State University<br>United States of America (the)                        | Serfass, Thomas<br>Professor, Wildlife Ecology<br>Frostburg State University<br>United States of America (the)    |



|                                                                                                                                                                                       |                                                                                                                                               |                                                                                                                                                                                                               |
|---------------------------------------------------------------------------------------------------------------------------------------------------------------------------------------|-----------------------------------------------------------------------------------------------------------------------------------------------|---------------------------------------------------------------------------------------------------------------------------------------------------------------------------------------------------------------|
| Sergi, Díez<br>Tenured Scientist<br>CSIC<br>Spain                                                                                                                                     | Sergiel, Agnieszka<br>Assistant professor, biologist<br>Institute of Nature Conservation, Polish Academy of Sciences<br>Poland                | Sergio, Fabrizio<br>Researcher / Ecology<br>Estacion Biologica de Doñana - CSIC<br>Spain                                                                                                                      |
| Seri, Guillermina<br>Associate Professor of Political Science<br>Union College<br>United States of America (the)                                                                      | Seric, Ivana<br>Data Scientist<br>United States of America (the)                                                                              | SERRA, LUIS<br>BOTANIST<br>Research Station Font Roja Natura University of Alicante<br>Spain                                                                                                                  |
| Serra, Sónia<br>Researcher, PhD in Aquatic Ecology<br>Portugal                                                                                                                        | Serra-Gonçalves, Catarina<br>PhD candidate<br>University of Tasmania - Biological Sciences<br>Portugal                                        | Serralheiro, Rafael Lopes<br>Student / Environmental Sciences<br>UNIFESP<br>Brazil                                                                                                                            |
| Serralheiro, Ricardo Paulo<br>Professor, retired, and researcher, Agricultural Engineering<br>Institute of Mediterranean Agriculture and Environment, University of Évora<br>Portugal | Serranito, Bruno<br>PhD in Ecology<br>France                                                                                                  | Serrano, Elba<br>Professor, Neuroscientist<br>New Mexico State University<br>United States of America (the)                                                                                                   |
| Serrano, Filipe<br>PhD Candidate<br>University of Sao Paulo<br>Brazil                                                                                                                 | Serrano, Mario<br>Associate Professor<br>Center for Genomic Sciences, UNAM<br>Mexico                                                          | SERRANO CARNERO, DIEGO<br>PHD STUDENT<br>Instituto de Hortofruticultura Subtropical y Mediterránea "La Mayora"-Universidad de Málaga-Consejo Superior de Investigaciones Científicas (IHSM-UMA-CSIC)<br>Spain |
| Serra-Sogas, Norma<br>Research Associate<br>University of Victoria<br>Canada                                                                                                          | Servonnat, Jérôme<br>Engineer - Researcher<br>LSCE<br>France                                                                                  | Sesegalia, Kevin<br>Master of Science - Biology, (student)<br>University of the South Pacific<br>Solomon Islands                                                                                              |
| Sesin, Verena<br>PhD Student - Ecotoxicology<br>Trent University<br>Canada                                                                                                            | Setchell, Joanna<br>Professor of Evolutionary Anthropology<br>Durham University<br>United Kingdom of Great Britain and Northern Ireland (the) | Sethi, Raman *<br>Bioinformatics<br>National University of Singapore<br>India                                                                                                                                 |
| Setiawan, Fakhrizal *<br>Reef fish ecologist<br>Wildlife Conservation Societt<br>Indonesia                                                                                            | Settle, Damian<br>Tropical Forestry Research<br>James Cook University<br>Australia                                                            | Sevilha, Anderson C.<br>Researcher<br>EMBAPA - Brazilian Agricultural Research Corporation<br>Brazil                                                                                                          |

|                                                                                                                                          |                                                                                                                                                           |                                                                                                                                                   |
|------------------------------------------------------------------------------------------------------------------------------------------|-----------------------------------------------------------------------------------------------------------------------------------------------------------|---------------------------------------------------------------------------------------------------------------------------------------------------|
| Seville, Robert<br>Professor of Zoology and Physiology<br>University of Wyoming<br>United States of America (the)                        | Seward, Adam<br>Conservation Scientist<br>RSPB<br>United Kingdom of Great Britain and Northern Ireland (the)                                              | Sexton, Jason<br>Assistant Professor, Ecology<br>University of California, Merced<br>United States of America (the)                               |
| Seyed Emami, Kavous<br>Professor, Sociology<br>Imam Sadeq University<br>Canada                                                           | Seymour, Colleen<br>Ecologist<br>South African National Biodiversity Institute<br>South Africa                                                            | Seymour, Zeddy<br>Marine Conservationist<br>MarAlliance<br>Cabo Verde                                                                             |
| Sfair, Julia<br>Post-doc<br>University of South Bohemia<br>Brazil                                                                        | Sfenthourakis, Spyros<br>Associate Professor of Biodiversity and Ecology<br>University of Cyprus<br>Cyprus                                                | Sgolastra, Fabio<br>Entomologist<br>University of Bologna<br>Italy                                                                                |
| Shaanika, Titus<br>Marine Conservationist<br>Namibia                                                                                     | Shabaka, Soha<br>Assistant professor<br>National institute of oceanography and fisheries<br>Egypt                                                         | Shabani, Kasongo *<br>Chercheur et enseignant<br>Université Libre des Pays des Grands Lacs<br>Congo (the Democratic Republic of the)              |
| Shacham, Boaz<br>Herpetological Collection Manager, National Natural History Collections<br>The Hebrew University of Jerusalem<br>Israel | Shackelford, Gorm<br>Post-Doctoral Research Associate<br>University of Cambridge<br>United Kingdom of Great Britain and Northern Ireland (the)            | Shackelford, Nancy<br>Community ecologist<br>University of Victoria<br>Canada                                                                     |
| Shackell, Nancy<br>Research Scientist/Marine Ecology<br>Bedford Institute of Oceanography<br>Canada                                      | Shadrack, Andrew<br>Political Scientist (retired)<br>Canada                                                                                               | Shadrin, Nikolai<br>leading research scientist, aquatic ecology<br>Kovalevsky Institute of Marine Biological Research<br>Russian Federation (the) |
| Shaffer, Gary<br>Professor of Biological Sciences<br>Southeastern Louisiana University<br>United States of America (the)                 | Shaffer, L. Jen<br>Assistant Professor, Ecological & Environmental Anthropology<br>University of Maryland, College Park<br>United States of America (the) | Shafir, Sharoni<br>Professor of Entomology<br>Hebrew University of Jerusalem<br>Israel                                                            |
| Shah, Shipra<br>Asst. Professor Forestry<br>Fiji National University<br>Fiji                                                             | Shah, Vijay<br>Engineer<br>Reaction engines<br>United Kingdom of Great Britain and Northern Ireland (the)                                                 | Shahriari, Shahriar<br>Professor of Mathematics<br>Pomona College<br>United States of America (the)                                               |
| Shahsavari, Azadeh<br>EMBL Hamburg<br>Germany                                                                                            | Shake, Corey<br>Partner Biologist<br>Point Blue Conservation Science<br>United States of America (the)                                                    | Shalders, Tanika<br>Marine and Environmental Scientist<br>Curtin University<br>Australia                                                          |

|                                                                                                                                  |                                                                                                                                                    |                                                                                                                                         |
|----------------------------------------------------------------------------------------------------------------------------------|----------------------------------------------------------------------------------------------------------------------------------------------------|-----------------------------------------------------------------------------------------------------------------------------------------|
| Shallom, Omri<br>MSc Student<br>Bar-Ilan University<br>Israel                                                                    | Shamaskin, Andrew<br>Graduate Research Assistant, Fisheries Science<br>Mississippi State University<br>United States of America (the)              | Shanahan, Danielle<br>Manager Conservation and Research<br>Zealandia<br>New Zealand                                                     |
| Shanahan, Mike<br>PhD in tropical rainforest ecology<br>United Kingdom of Great Britain and Northern Ireland (the)               | Shanas, Uri<br>Professor of Conservation Biology<br>University of Haifa-Oranim<br>Israel                                                           | Shanee, Sam<br>Conservation Biologist<br>Neotropical Primate Conservation<br>United Kingdom of Great Britain and Northern Ireland (the) |
| Shangguan, Wei<br>Associate Professor<br>Sun Yat-sen University<br>China                                                         | Shannon, Graeme<br>Lecturer in Zoology<br>Bangor University<br>United Kingdom of Great Britain and Northern Ireland (the)                          | Shao, Kwang-Tsao<br>Chair Professor/Marine biology<br>National Taiwan Ocean University<br>Hungary                                       |
| Sharma, Akanksha<br>Graduate Researcher<br>The University of Arizona, Tucson, USA<br>India                                       | Sharma, Gyan Prakash<br>Assistant Professor<br>Department of Environment Studies, University of Delhi,<br>Delhi<br>India                           | Sharma, MD<br>Research Fellow<br>University of Exeter<br>United Kingdom of Great Britain and Northern Ireland (the)                     |
| Sharma, Shashi<br>EX Principal Scientist (Entomology)<br>Indian Council of Agricultural Research<br>India                        | Sharma, Yash Paul<br>Assistant Professor<br>Central Institute of Educational technology, NCERT, New<br>Delhi<br>India                              | Sharp, Adam<br>PhD Student<br>Imperial College London<br>United Kingdom of Great Britain and Northern Ireland (the)                     |
| Sharp, Andy<br>Ecologist<br>Australia                                                                                            | Sharpe, Ashley<br>Archaeologist<br>Smithsonian Tropical Research Institute<br>United States of America (the)                                       | Sharpe, Ciara<br>Fisheries Biologist<br>Sharpe<br>Canada                                                                                |
| Sharpe, William<br>Professor Emeritus of Forest Hydrology<br>The Pennsylvania State University<br>United States of America (the) | Sharps, Elwyn<br>Conservation Ecology<br>United Kingdom of Great Britain and Northern Ireland (the)                                                | Shashar, Nadav<br>Prof. , Academic Director<br>Ben Gurion University at Eilat<br>Israel                                                 |
| Shavandi, Amin<br>Postdoc/Biomaterial<br>University of Otago<br>New Zealand                                                      | Shaw, Lorna<br>Ecologist<br>United Kingdom of Great Britain and Northern Ireland (the)                                                             | Shaw, sally<br>Teacher<br>Australia                                                                                                     |
| Shaw, Suzanne<br>Energy Economics<br>Caribbean Policy Research Institute<br>Jamaica                                              | Shaw, William<br>Professor Emeritus<br>University of Arizona, School of Natural Resources and<br>the Environment<br>United States of America (the) | Shcherbakov, Dmitry<br>Paleontological Institute RAS<br>Russian Federation (the)                                                        |

|                                                                                                                                    |                                                                                                                                                                 |                                                                                                                                                                                |
|------------------------------------------------------------------------------------------------------------------------------------|-----------------------------------------------------------------------------------------------------------------------------------------------------------------|--------------------------------------------------------------------------------------------------------------------------------------------------------------------------------|
| Shea, Glenn<br>Senior Lecturer in Veterinary Anatomy, Sydney School of Veterinary Science<br>University of Sydney<br>Australia     | Sheard, Emma Jane<br>PhD/Applied ecology and agriculture<br>The University of Stirling<br>United Kingdom of Great Britain and Northern Ireland (the)            | Shearman, David<br>Emeritus Professor of Medicine<br>University of Adelaide<br>Australia                                                                                       |
| Shearman, Philip<br>Visiting Fellow<br>Australian National University<br>Australia                                                 | Sheehan, Tim<br>Ecological modeling<br>United States of America (the)                                                                                           | Sheeren, David<br>Associate Professor, Geographical Information Sciences<br>University of Toulouse, INP-ENSAT<br>France                                                        |
| Sheets, Payson<br>Professor, Anthropology<br>University of Colorado<br>United States of America (the)                              | Shefferson, Richard<br>Associate professor, Evolutionary ecology<br>University of Tokyo<br>Japan                                                                | Sheffield, Dr. Steve<br>Professor of Biology<br>Bowie State University<br>United States of America (the)                                                                       |
| Sheil, Douglas<br>Professor Tropical Ecology<br>Norwegian University of Life Sciences<br>Norway                                    | Shekhawat, Narpal<br>Retired Professor of Botany, former head, and Incharge of Biotechnology Unit<br>JNV university, Jodhpur (retired Professor) Jodhpur, India | Shellberg, Jeffrey<br>Adjunct Research Fellow, Fluvial Geomorphology and Hydrology<br>Griffith University, Australian Rivers Institute<br>Australia                            |
| Shelley, Rachel<br>Postdoc/ oceanography<br>Florida State University<br>United Kingdom of Great Britain and Northern Ireland (the) | Shelton, Jeremy<br>Researcher<br>Freshwater Research centre<br>South Africa                                                                                     | Shemet, Sergiy<br>Researcher<br>Dnipro National University<br>Ukraine                                                                                                          |
| Shen, Xianhui<br>Research Assistant, Ecology<br>Xishuangbanna Tropical Botanical Garden, Chinese Academy of Sciences<br>China      | Shende, Kundalik *<br>Research Fellow<br>Shivaji University, Kolhapur (MS)<br>India                                                                             | Shenkute, Moges Beletew<br>PhD candidate in Fisheries and Aquatic Science stream @ Addis Ababa Univeristy<br>Ethiopia                                                          |
| Shepard, Donald<br>Assistant Professor of Biology<br>Louisiana Tech University<br>United States of America (the)                   | Shepherd, Elizabeth<br>Sustainability<br>Bangor University<br>United Kingdom of Great Britain and Northern Ireland (the)                                        | Shepherd, Keith<br>Principal Soil Scientist / Leader Restoring Degraded Landscapes<br>Word Agroforestry Centre & CGIAR Research Programme on Water, Land & Ecosystems<br>Kenya |
| Sheppard, Anne<br>Research Associate<br>University of Warwick<br>United Kingdom of Great Britain and Northern Ireland (the)        | Sheppard, Charles<br>Emeritus Professor Marine biology<br>University of Warwick<br>United Kingdom of Great Britain and Northern Ireland (the)                   | Sheppard, Christine S.<br>Plant ecologist<br>University of Hohenheim<br>Germany                                                                                                |

|                                                                                                                                             |                                                                                                                                                            |                                                                                                                               |
|---------------------------------------------------------------------------------------------------------------------------------------------|------------------------------------------------------------------------------------------------------------------------------------------------------------|-------------------------------------------------------------------------------------------------------------------------------|
| Sheppard-Brennand, Hannah<br>PhD student in marine ecology<br>Southern Cross University<br>Australia                                        | Sher, Anna<br>Professor of Biology<br>University of Denver<br>United States of America (the)                                                               | Sherman, Craig<br>Senior Lecturer in Environmental Ecology<br>Deakin Univeristy<br>Australia                                  |
| Sherman, Krista<br>Biological and Marine Sciences<br>Bahamas (the)                                                                          | Sherren, Kate<br>Associate Professor, Landscape<br>Dalhousie University<br>Canada                                                                          | Sherry, Thomas<br>Professor Ecology and Evolutionary Biology<br>Tulane University<br>United States of America (the)           |
| Sherwood, Steven<br>Professor of Atmospheric Sciences<br>UNSW Sydney<br>Australia                                                           | Shevtsov, Jane<br>Ecologist and Postdoctoral Fellow in Curriculum<br>Development<br>University of California Los Angeles<br>United States of America (the) | Shewring, Mike<br>Senior Ecologist<br>Natural Power<br>United Kingdom of Great Britain and Northern Ireland<br>(the)          |
| Shiaris, Michael<br>Professor/Microbiology<br>University of Massachusetts Boston<br>United States of America (the)                          | Shibatta, Oscar Akio<br>Professor Associado<br>Universidade Estadual de Londrina<br>Brazil                                                                 | Shiel, Russell<br>Visiting Research Fellow<br>University of Adelaide<br>Australia                                             |
| SHIELDS, JAMES *<br>Vice-President, Board of Directors/Terrestrial Ecology<br>Australian Ecosystem Foundation, Inc.<br>Australia            | Shier, Debra<br>Associate Director of Recovery Ecology<br>San Diego Zoo Institute for Conservation Research<br>United States of America (the)              | Shifflette, Amy<br>Science Diplomacy<br>American Association for the Advancement of Science<br>United States of America (the) |
| Shifrine, Moshe<br>Professor of Immunology (Retired)<br>University of California Davis<br>United States of America (the)                    | Shigenaka, Gary<br>Senior marine biologist<br>National Oceanic & Atmospheric Administration<br>United States of America (the)                              | Shimabukuro, Marcia Aparecida<br>Biologist<br>Instituto de Observatório da Terra - InOT<br>Brazil                             |
| Shimizu, Gustavo<br>Plant Systematics<br>University of Campinas<br>Brazil                                                                   | Shinzato, Mirian<br>Associate Professor / Environmental Science<br>Universidade Federal de São Paulo<br>Brazil                                             | Shiple, John William (Bill)<br>full professor<br>Université de Sherbrooke<br>Canada                                           |
| Shiple, Nathan<br>Ph.D. Student Natural Resources and Environmental<br>Sciences<br>University of Illinois<br>United States of America (the) | Shipunov, Alexey<br>Associate Professor of Biology<br>Minot State University<br>United States of America (the)                                             | Shmaefsky, Brian<br>Professor of Envionmental Sciences<br>Lone Star College<br>United States of America (the)                 |
| Shochat, Eyal<br>Ecologist/ Senior lecturer<br>Ben Gurion University of the Negev<br>Israel                                                 | Shockett, Penny<br>Professor of Biological Sciences/Immunology<br>Southeastern Louisiana University<br>United States of America (the)                      | Shofner, Ryan<br>PhD Candidate in Entomology<br>University of New South Wales<br>Australia                                    |

|                                                                                                                                                        |                                                                                                                             |                                                                                                                                                |
|--------------------------------------------------------------------------------------------------------------------------------------------------------|-----------------------------------------------------------------------------------------------------------------------------|------------------------------------------------------------------------------------------------------------------------------------------------|
| SHOHAM, JACOB<br>Professor emeritus, MD, PhD, Internal Medicine, Cancer research<br>Bar-Ilan University, Faculty of Life Sciences<br>Israel            | Shohami, David<br>PhD candidate in Ecology, Evolution and Behavior<br>The Hebrew University of Jerusalem<br>Israel          | SHOME, SUBHAJIT<br>Economist<br>Saraf Gurukul<br>India                                                                                         |
| Shoobs, Nathaniel<br>PhD student and Graduate Research Associate<br>Academy of Natural Sciences of Drexel University<br>United States of America (the) | Shoravi, Siamak<br>PhD, Chemistry<br>Sweden                                                                                 | Shores, Carolyn<br>Ph.D. Candidate/Wildlife Biology<br>University of Washington<br>United States of America (the)                              |
| Short, Michael<br>Environmental Scientist<br>University of South Australia<br>Australia                                                                | Short, Rebecca<br>PhD Student<br>Imperial College London<br>United Kingdom of Great Britain and Northern Ireland (the)      | Short, Roger<br>Emeritus Professor, Reproductive Biology<br>University of Melbourne<br>Australia                                               |
| Showalter, Allan<br>Professor, Plant Molecular Biology and Biochemistry<br>Ohio University<br>United States of America (the)                           | Showalter, Ann<br>Assistant professor, aquatic ecologist<br>Clayton State University<br>United States of America (the)      | Shrader, Adrian<br>Associate Professor<br>University of Pretoria<br>South Africa                                                               |
| Shrestha, Bharat Babu<br>Associate Professor<br>Tribhuvan University<br>Nepal                                                                          | Shrimpton, Claire<br>Research Assistant (Biology)<br>University of Windsor<br>Canada                                        | Shukla, Priya<br>Ocean Acidification Technician<br>Bodega Marine Laboratory, University of California, Davis<br>United States of America (the) |
| Shum, Peter<br>Postdoctoral Researcher in Marine Biology<br>Stanford University<br>United States of America (the)                                      | Shuman, Leonid<br>ichthyologist<br>University of Tyumen<br>Russian Federation (the)                                         | Shumka, Spase<br>Lecturer of Biology<br>Agricultural University of Tirana<br>Albania                                                           |
| Shutler, Jamie<br>Associate Professor<br>University of Exeter<br>United Kingdom of Great Britain and Northern Ireland (the)                            | Shyry, Darcey<br>Instructor of Environmental Sciences<br>Lakeland College<br>Canada                                         | Sibomana, Claver<br>Ecology and biodiversity consevation<br>University of Burundi<br>Burundi                                                   |
| Siddens, Lisbeth<br>researcher/Environmental and Molecular Toxicology<br>Oregon State University<br>United States of America (the)                     | Sidlauskas, Brian<br>Associate Professor and Curator of Fishes<br>Oregon State University<br>United States of America (the) | Siebert, Fernanda<br>Master in environmental sciences<br>USP<br>Brazil                                                                         |
| Siebert, Frances<br>Senior Lecturer and researcher in Ecology<br>North-West University<br>South Africa                                                 | Siebert, Stefan J.<br>Associate Professor<br>North-West University<br>South Africa                                          | Siegel, Dustin<br>Associate Professor<br>Southeast Missouri State University<br>United States of America (the)                                 |

|                                                                                                                                                                        |                                                                                                                          |                                                                                                                                                                   |
|------------------------------------------------------------------------------------------------------------------------------------------------------------------------|--------------------------------------------------------------------------------------------------------------------------|-------------------------------------------------------------------------------------------------------------------------------------------------------------------|
| Siegrist, Victoria<br>Decision Scientist<br>University of Basel<br>Switzerland                                                                                         | Siegwart, Myriam<br>Engineer in Agricultural Entomology<br>National Institute for Agricultural Research (INRA)<br>France | Siering, Patricia<br>Professor microbial ecology- microbiology<br>Humboldt State University<br>United States of America (the)                                     |
| Sierka, Edyta<br>scientist/environmental science<br>Faculty of Biology and Environmental Protection<br>Poland                                                          | Sierralta, Carlos<br>Geographer<br>Chile                                                                                 | Sievers, Silvan<br>PhD Student<br>University of Basel<br>Switzerland                                                                                              |
| Siewert, Matthias<br>Postdoctoral Researcher, Arctic ecosystems<br>Umeå University<br>Sweden                                                                           | Sigaud, Marie<br>Wildlife Biologist / Ecology<br>Oxford Brookes University<br>France                                     | Sigl, Robert<br>PhD-Student Ecology<br>University of Bayreuth<br>Germany                                                                                          |
| Sigloch, Florian Christoph<br>Bioinformatician<br>Center for Biological Systems Analysis, University of<br>Freiburg<br>Germany                                         | Sigmund, Gabriel<br>University of Vienna<br>Austria                                                                      | Signarbieux, Constant<br>Research Associate<br>Swiss Institute of Technology Lausanne<br>Switzerland                                                              |
| Sigrist, Maria Rosangela<br>Professor<br>Universidade Federal de Mato Grosso do Sul<br>Brazil                                                                          | SIGURA, MAURIZIA<br>RESEARCHER<br>UNIVERSITY OF UDINE<br>Italy                                                           | Sigwart, Julia<br>Associate professor, Marine Biology<br>Queen's University Belfast<br>United Kingdom of Great Britain and Northern Ireland<br>(the)              |
| Sihi, Debjani<br>Postdoctoral Investigator<br>University of Maryland Center for Environmental Science<br>United States of America (the)                                | Sikes, Derek<br>Associate Professor of Entomology<br>University of Alaska Fairbanks<br>United States of America (the)    | Siler, Eleanor<br>Michigan State University<br>United States of America (the)                                                                                     |
| Silingardi, Helena Maura Torezan<br>Professor Doctor / Vegetal Physiology and Morphology;<br>Pollination Ecology<br>Federal University of Uberlândia, Brazil<br>Brazil | Siljak-Yakovlev, Sonja<br>evolutionary biology<br>CNRS Ecologie, Systematique et Evolution, Univ. Paris Sud<br>France    | Silla, Fernando<br>Associate Professor/ Ecology<br>University of Salamanca<br>Spain                                                                               |
| Sillam-Dussès, David<br>Associate professor<br>University Paris 13<br>France                                                                                           | Sillero, Neftalí<br>Auxiliary researcher<br>CICGE/FCUP<br>Portugal                                                       | Sillero-Zubiri, Claudio<br>Wildlife Conservation Research Unit (WildCRU)<br>University of Oxford<br>United Kingdom of Great Britain and Northern Ireland<br>(the) |
| Silumesi, Mwala<br>Development worker<br>Keepers Zambia Foundation<br>Zambia                                                                                           | Silva, Anne-Sophie<br>PhD Student<br>São Paulo State University<br>Brazil                                                | Silva, Daniel<br>Professor / Environmental Sanitation<br>UNESP<br>Brazil                                                                                          |

|                                                                                                                                          |                                                                                                                                      |                                                                                                                  |
|------------------------------------------------------------------------------------------------------------------------------------------|--------------------------------------------------------------------------------------------------------------------------------------|------------------------------------------------------------------------------------------------------------------|
| Silva, Daniel<br>Professor of Ecology and Evolution<br>Instituto Federal Goiano, Campus Urutaí<br>Brazil                                 | Silva, Diego Maciel Blum<br>M. Sc. Student, Agroecology and Rural Development<br>Federal University of São Carlos - UFSCar<br>Brazil | SILVA, DULCE<br>Associate Professor on Organic Chemistry<br>UNESP - Sao Paulo State University<br>Brazil         |
| Silva, Fabio Laurindo da<br>Postdoctoral researcher<br>University of São Paulo<br>Brazil                                                 | Silva, Felipe<br>PhD Student<br>University of Salford<br>Brazil                                                                      | Silva, Fernando<br>Professor<br>Universidade Federal de Juiz de Fora<br>Brazil                                   |
| Silva, Flávio *<br>Tutor<br>FPS<br>Brazil                                                                                                | Silva, José Natalino Macedo<br>University Lecturer<br>Universidade Federal Rural da Amazônia<br>Brazil                               | Silva, Liriann<br>Master's Degree student<br>Universidade Federal do Pará<br>Brazil                              |
| Silva, Luciana Ferreira *<br>Mudança do Clima<br>UNIFESP SJC<br>Brazil                                                                   | Silva, Miguel<br>Master's student/Researcher<br>Pontifícia Universidade Católica de São Paulo<br>Brazil                              | Silva, Rafaela G.<br>Ph.D. student<br>Federal University of Lavras<br>Brazil                                     |
| Silva, Ramon Felipe Bicudo<br>Postdoctoral research fellow<br>State University of Campinas<br>Brazil                                     | Silva, Sarah *<br>Researcher- Forest Ecology<br>Institute of Sustainable Development Mamirauá<br>Brazil                              | Silva, Sofia Marques<br>Post-Doc Researcher (Biology-Genetics)<br>Portugal                                       |
| Silva, Suelma *<br>PhD Ecology<br>Centro Nacional de Avaliação da Biodiversidade e<br>Pesquisa e Conservação do Cerrado/ICMBio<br>Brazil | Silva, Teresa L<br>PhD Student<br>CIBIO/InBio - UP<br>Portugal                                                                       | Silva, Thadia Turon<br>Human Nutrition<br>Federal University of Rio de Janeiro<br>Brazil                         |
| Silva, Thiago<br>Assistant Professor<br>São Paulo State University (UNESP)<br>Brazil                                                     | Silva, Vera Cristina<br>Assistant Professor of Invertebrates<br>Universidade Estadual Paulista UNESP/ FCAV<br>Brazil                 | Silva, Wesley<br>Associate Professor<br>Campinas State University<br>Brazil                                      |
| Silva Angelieri, Cintia C<br>Posdoc - Environmental Sciences<br>University of São Paulo<br>Brazil                                        | Silva Cabral, Eiderson<br>Professor MSc. of Biology/Environment<br>Federal Institute of Maranhão<br>Brazil                           | Silva Carneiro, Luciana<br>Associate Professor of Ecology<br>Federal University of Rio Grande do Norte<br>Brazil |
| Silva da Costa, Warlen *<br>Biologist<br>Universidade Estadual do Norte Fluminense Darcy Ribeiro<br>Brazil                               | Silva Fernandes, Daniel<br>Professor, Zoology<br>Universidade Federal do Rio de Janeiro<br>Brazil                                    | Silva Fernandes, Maria Jose<br>Professor Associado/Neurosciencia<br>Unifesp<br>Brazil                            |



|                                                                                                                                                 |                                                                                                                   |                                                                                                                                                                    |
|-------------------------------------------------------------------------------------------------------------------------------------------------|-------------------------------------------------------------------------------------------------------------------|--------------------------------------------------------------------------------------------------------------------------------------------------------------------|
| Silva-Cossio, Nathalie<br>Bachelor in Biological Science<br>Austral University of Chile<br>Chile                                                | Silva-Espejo, Javier E.<br>PhD student<br>University of La Serena<br>Chile                                        | SILVAIN, Jean-François<br>President<br>French Foundation for Research on Biodiversity (FRB)<br>France                                                              |
| Silvano, Renato<br>Professor/Ecology<br>Universidade Federal do Rio Grande do Sul<br>Brazil                                                     | Silva-Rocha, Rafael<br>Assistant Professor<br>Ribeirão Preto Medical School<br>Brazil                             | Silva-Rodriguez, Eduardo<br>Assistant Professor<br>Departamento de Ecología y Biodiversidad, Universidad<br>Andres Bello<br>Chile                                  |
| Silveira, Carla<br>Nursing Professor Women's Health Discipline<br>University Centre of Jaguariúna and State University of<br>Campinas<br>Brazil | Silveira, Fernando<br>Professor of Plant Ecology and Evolution<br>Universidade Federal de Minas Gerais<br>Brazil  | Silveira, Marcos<br>Associated Professor<br>Universidade Federal do Acre<br>Brazil                                                                                 |
| Silveira Rodrigues, Nicolau André<br>Visiting Professor<br>Technological Institute of Aeronautics<br>Brazil                                     | Silvera, Katia<br>Postdoctoral Researcher<br>University of California Riverside<br>United States of America (the) | Silver-Westrick, Amanda<br>Water Resources Planner/Scientist<br>United States of America (the)                                                                     |
| Silvestre, Frédéric<br>Professor<br>University of Namur<br>Belgium                                                                              | Silvestre, Rogerio<br>Professor Associado II/ Evolução<br>Universidade Federal da Grande Dourados- UFGD<br>Brazil | Silvestre de Carvalho Correia, Caio<br>PhD Student<br>Univesidade de São Paulo<br>Brazil                                                                           |
| Silye, Lóránd<br>Lecturer<br>Department of Geology, Babeş-Bolyai University<br>Romania                                                          | Sim, Innes<br>Conservation Scientist<br>RSPB<br>United Kingdom of Great Britain and Northern Ireland<br>(the)     | Sim, Mike<br>MSc, Entomology/Ecology<br>New Zealand                                                                                                                |
| Sima, Adriana<br>Research Engineer<br>France                                                                                                    | Simao-Bianchini, Rosangela<br>Scientific researcher<br>Instituto de Botânica<br>Brazil                            | Simelton, Elisabeth<br>Climate Change Scientist<br>ICRAF<br>Viet Nam                                                                                               |
| Simes, Adriana *<br>Mg. Cs. Agrarias y Biotecnología / Docente-Investigador<br>Universidad Nacional del Comahue<br>Argentina                    | Simioni, Guillaume<br>research scientist<br>INRA<br>France                                                        | Simis, Stefan<br>Senior Earth Observation Scientist (Inland Waters)<br>Plymouth Marine Laboratory<br>United Kingdom of Great Britain and Northern Ireland<br>(the) |
| Simkanin, Christina<br>Postdoctoral Fellow<br>Smithsonian Environmental Research Center<br>United States of America (the)                       | Simmons, Laura<br>Post-Doctoral Researcher, Conservation Genetics<br>Australia                                    | Simmons, Rachel<br>Assistant Professor of Biology<br>National University<br>United States of America (the)                                                         |

|                                                                                                                                                                     |                                                                                                                            |                                                                                                                                                                                 |
|---------------------------------------------------------------------------------------------------------------------------------------------------------------------|----------------------------------------------------------------------------------------------------------------------------|---------------------------------------------------------------------------------------------------------------------------------------------------------------------------------|
| <p>Simms, Ellen<br/>Professor of Integrative Biology<br/>University of California, Berkeley<br/>United States of America (the)</p>                                  | <p>Simo, Rafel<br/>Institut de Ciències del Mar, CSIC<br/>Spain</p>                                                        | <p>Simões, Joana<br/>Portugal</p>                                                                                                                                               |
| <p>Simões, Raquel<br/>Parasitology<br/>FIOCRUZ<br/>Brazil</p>                                                                                                       | <p>Simões de Castro, Luiz Alexandre<br/>PhD student<br/>UNESP<br/>Brazil</p>                                               | <p>Simões Santos Leal, Bárbara<br/>Doctorate candidate in Ecology and biodiversity<br/>Unesp<br/>Brazil</p>                                                                     |
| <p>Simon, Alexis<br/>PhD student<br/>France</p>                                                                                                                     | <p>Simon, Audrey<br/>Postdoctoral fellow<br/>University of Montreal<br/>Canada</p>                                         | <p>Simon, Carine<br/>Researcher in Marine Science<br/>CSIC<br/>Spain</p>                                                                                                        |
| <p>Simon, Dominic<br/>Psychology<br/>New Mexico State University<br/>United States of America (the)</p>                                                             | <p>Simon, Monique<br/>Post Doctoral Fellow/Evolutionary Biology<br/>Universidade de Sao Paulo<br/>Brazil</p>               | <p>Simonassi, Jose Carlos<br/>Biologist / laboratory technician<br/>Universidade Federal de Santa Catarina<br/>Brazil</p>                                                       |
| <p>Simon-Bouhet, Benoit<br/>Associate professor in biology<br/>University of La Rochelle<br/>France</p>                                                             | <p>Simone, Domenico<br/>Professore Adjunto / Aerospace Propulsion<br/>Universidade de Brasilia - DF - Brasil<br/>Italy</p> | <p>Simonelli, Jeanne<br/>Anthropologist emerita<br/>Wake Forest University<br/>United States of America (the)</p>                                                               |
| <p>Simonetti, Javier A.<br/>Professor, Conservation Biology<br/>Universidad de Chile<br/>Chile</p>                                                                  | <p>Simonin, Paul<br/>Postdoctoral research associate<br/>Cornell University<br/>United States of America (the)</p>         | <p>Simonis, Anne<br/>PhD Candidate<br/>Scripps Institution of Oceanography, UCSD<br/>United States of America (the)</p>                                                         |
| <p>Simons, Andrew<br/>Professor &amp; Curator, Fisheries, Wildlife, and Conservation<br/>Biology<br/>University of Minnesota<br/>United States of America (the)</p> | <p>Simons, Nadja<br/>Postdoctoral researcher in ecology<br/>Technical University of Munich<br/>Germany</p>                 | <p>Simonson, William<br/>Ecology and conservation<br/>United Kingdom of Great Britain and Northern Ireland<br/>(the)</p>                                                        |
| <p>Simpkins, Craig<br/>Postdoctoral Researcher<br/>Georg-August University Goettingen<br/>Germany</p>                                                               | <p>Simpson, Annie<br/>invasive species informatics<br/>United States of America (the)</p>                                  | <p>Simpson, James<br/>Head of Forestry and Land Management<br/>Forest Enterprise England<br/>United Kingdom of Great Britain and Northern Ireland<br/>(the)</p>                 |
| <p>Simpson, Juliet<br/>Ecologist<br/>Massachusetts Institute of Technology<br/>United States of America (the)</p>                                                   | <p>Simpson, Lalita<br/>PhD Candidate in Evolutionary Biology<br/>Australian Tropical Herbarium<br/>Australia</p>           | <p>Simpson, Steve<br/>Associate Professor of Marine Biology &amp; Global Change<br/>University of Exeter<br/>United Kingdom of Great Britain and Northern Ireland<br/>(the)</p> |

|                                                                                               |                                                                                                                        |                                                                                                                               |
|-----------------------------------------------------------------------------------------------|------------------------------------------------------------------------------------------------------------------------|-------------------------------------------------------------------------------------------------------------------------------|
| Simpson, Stuart *                                                                             | Sinay, Laura                                                                                                           | Sincero, Thaís                                                                                                                |
| Senior Principal Research Scientist / PhD Chemistry<br>CSIRO<br>Australia                     | Professor<br>Federal University of the Rio de Janeiro State - UNIRIO<br>Brazil                                         | Associate Professor at Clinical Analysis Department<br>Federal University of Santa Catarina<br>Brazil                         |
| Sinclair, Amanda                                                                              | Sinclair, Cheryl                                                                                                       | Sinclair, Elizabeth                                                                                                           |
| Ecology<br>University of Tasmania<br>Australia                                                | Manager and sales rep<br>Backwoods Solar Canada<br>Canada                                                              | Senior Research Fellow<br>School of Biological Sciences and Oceans Institute,<br>University of Western Australia<br>Australia |
| Sinclair, Ross                                                                                | Sindhania, Ankita *                                                                                                    | Sindičić, Magda                                                                                                               |
| Regional Director, South East Asia Archipelago<br>Wildlife Conservation Society<br>Indonesia  | Scientist B<br>National institute of Malaria Research, New Delhi<br>India                                              | assistant professor<br>Faculty of Veterinary Medicine University of Zagreb<br>Croatia                                         |
| Sinfort, Carole                                                                               | Singer, Andrew                                                                                                         | Singer, Gabriel                                                                                                               |
| Professor<br>Montpellier SupAgro<br>France                                                    | Senior Scientist<br>NERC Centre for Ecology & Ecology<br>United Kingdom of Great Britain and Northern Ireland<br>(the) | Senior Scientist, Ecology<br>Leibniz-Institute of Freshwater Ecology and Inland<br>Fisheries<br>Germany                       |
| Singer, William                                                                               | Singh, Devlina                                                                                                         | Singh, Dr. Richhpal *                                                                                                         |
| Emeritus Professor, Mathematics<br>Fordham University<br>United States of America (the)       | Teacher<br>Good Shepherd International School<br>India                                                                 | Sr. Lecturer in Botany<br>Government College, Jodhpur<br>India                                                                |
| Singh, Pooja *                                                                                | Singh, Sunil                                                                                                           | Singh, Yasmin                                                                                                                 |
| Research Evolutionary Biology<br>University of Graz<br>Austria                                | Lecturer in Biology<br>The University of the South Pacific<br>Samoa                                                    | Zoology student<br>Massey university<br>New Zealand                                                                           |
| Sinnesael, Arne                                                                               | Sintim, Henry                                                                                                          | Sipkema, Detmer                                                                                                               |
| PhD Student<br>KU Leuven<br>Belgium                                                           | PhD Candidate<br>Washington State University<br>United States of America (the)                                         | Associate Professor Marine Microbiology<br>Wageningen University<br>Netherlands (the)                                         |
| Siqueira, Felipe F. S.                                                                        | Siqueira, Marcos                                                                                                       | Siqueira, Tadeu *                                                                                                             |
| Programa de Pós-Graduação em Biologia Vegetal<br>Universidade Federal de Pernambuco<br>Brazil | Researcher in Applied Ecology<br>Universidade do Sagrado Coração<br>Brazil                                             | Professor<br>São Paulo State University - Unesp<br>Brazil                                                                     |
| Sirois, Marie-Eve                                                                             | Sirost, Laura                                                                                                          | Sisk, Thomas D *                                                                                                              |
| Consultant<br>N/A<br>Canada                                                                   | Associate Professor<br>The College of Wooster<br>United States of America (the)                                        | Olajos-Goslow Chair of Environmental Science and Policy<br>Northern Arizona University<br>United States of America (the)      |

|                                                                                                                                                                             |                                                                                                                                                                    |                                                                                                                                                            |
|-----------------------------------------------------------------------------------------------------------------------------------------------------------------------------|--------------------------------------------------------------------------------------------------------------------------------------------------------------------|------------------------------------------------------------------------------------------------------------------------------------------------------------|
| Sisson, Nick<br>Graduate Research Assistant<br>Old Dominion University<br>United States of America (the)                                                                    | Sisson, Pamela Jill<br>Environmental Arts & Humanities master's student/<br>former Science Teacher<br>Oregon State University<br>United States of America (the)    | Sitepu, Bina *<br>Researcher in Plant Ecology and Conservation<br>Forest Research and Development Agencies<br>Indonesia                                    |
| Sites, Jr., Dr. Jack W.<br>Professor of Biology and Curator of Herpetology<br>Brigham Young University<br>United States of America (the)                                    | Siva-Jothy, Michael<br>Professor of Entomology, Head of Department<br>The University of Sheffield<br>United Kingdom of Great Britain and Northern Ireland<br>(the) | Sjödin, Marcus<br>Research engineer in Analytical Chemistry<br>Swetox - Swedish Toxicology Sciences Research Center<br>Sweden                              |
| Sjogren-Gulve, Per<br>Assoc. professor Conservation Biology<br>Dept of Ecology & Genetics, Uppsala University<br>Sweden                                                     | Skaar, Mike<br>CEO<br>SFAI<br>United States of America (the)                                                                                                       | Skakala, Jozef<br>Research Scientist in EcoSystem Modelling<br>Plymouth Marine Laboratory<br>United Kingdom of Great Britain and Northern Ireland<br>(the) |
| Skandrani, Zina<br>Associate Researcher / Associate Programme Specialist<br>French National Museum of Natural History / UNESCO<br>Man and the Biosphere Programme<br>France | Skarin, Anna<br>Researcher<br>Swedish University of Agricultural Sciences<br>Sweden                                                                                | Skarpe, Christina<br>Professor Emerita of Applied Ecology<br>Norwegian Inland University of Applied Sciences<br>Norway                                     |
| Skelskey, David<br>Research<br>Manila Observatory<br>Philippines (the)                                                                                                      | Skidds, Dennis<br>Ecologist<br>University of Rhode Island<br>United States of America (the)                                                                        | Skillman, John<br>Professor of Environmental Biology<br>California State University<br>United States of America (the)                                      |
| Skinner, Christina<br>PhD Candidate in Tropical Marine Ecology<br>Newcastle University<br>United Kingdom of Great Britain and Northern Ireland<br>(the)                     | Skinner, Luis Felipe<br>Professor of Marine Zoology/ Ecology<br>Universidade do Estado do Rio de Janeiro<br>Brazil                                                 | SKLAIR, LESLIE<br>EMERITUS PROFESSOR OF SOCIOLOGY<br>LONDON SCHOOL OF ECONOMICS<br>United Kingdom of Great Britain and Northern Ireland<br>(the)           |
| Sklar, Leonard<br>Professor of Geology<br>Concordia University<br>Canada                                                                                                    | Sköld, Mattias<br>PhD, Marine scientist<br>Department of aquatic Resources, Swedish University of<br>Agricultural Sciences<br>Sweden                               | Skorka, Piotr<br>Associate Professor<br>Institute of Nature Conservation, Polish Academy of<br>Sciences<br>Poland                                          |
| Skov, Martin<br>Senior Lecturer<br>Bangor University<br>United Kingdom of Great Britain and Northern Ireland<br>(the)                                                       | Skovsgaard, Lise<br>PhD student in Energy and Environmental economics<br>DTU-MAN<br>Denmark                                                                        | Skrien, Dale<br>Professor of Computer Science<br>Colby College<br>United States of America (the)                                                           |

|                                                                                                                                     |                                                                                                                                    |                                                                                                                          |
|-------------------------------------------------------------------------------------------------------------------------------------|------------------------------------------------------------------------------------------------------------------------------------|--------------------------------------------------------------------------------------------------------------------------|
| Skriver, Hellmut-Michael<br>Lic. conc. theology, classical homoeopathy,<br>naturopathy,osteopathy<br>priv. practice<br>South Africa | Skubała, Piotr<br>Professor, soil ecologist<br>University of Silesia, Faculty of Biology and<br>Environmental Protection<br>Poland | Skubel, Rachel<br>PhD Student, Environmental Science and Policy<br>University of Miami<br>United States of America (the) |
| Slaney, Larissa<br>PhD student<br>Heriot Watt University<br>United Kingdom of Great Britain and Northern Ireland<br>(the)           | Slatauski, Teri<br>Wildlife biologist<br>United States of America (the)                                                            | Slatyer, Rachel<br>Postdoctoral research fellow<br>University of Wisconsin-Madison<br>United States of America (the)     |
| Slavenko, Alex<br>PhD Student, Zoology<br>Tel Aviv University<br>Israel                                                             | Sleboda, Patrycja<br>Decision Scientist<br>SWPS University of Social Sciences and Humanities<br>Poland                             | Slekiene, Jurgita<br>Psychology<br>EAWAG<br>Switzerland                                                                  |
| SLIMANI, Tahar<br>Teacher - Researcher<br>Cadi Ayyad University. Faculty of Sciences Semailia.<br>Marrakesh<br>Morocco              | Slingsby, Jasper<br>Biodiversity Scientist<br>South African Environmental Observation Network<br>(SAEON)<br>South Africa           | Slinn, Heather<br>PhD student<br>University of Nevada Reno<br>United States of America (the)                             |
| Slippers, Bernard<br>Professor in Genetics<br>FABI, University of Pretoria<br>South Africa                                          | Slobodian, Veronica<br>PhD Candidate, Biologist<br>Museu de Zoologia da Universidade de São Paulo<br>Brazil                        | Slovak, Eleanor R<br>M.D.<br>United States of America (the)                                                              |
| Smaili, Soraya<br>Professor and Rector<br>Federal University of São Paulo<br>Brazil                                                 | Smale, Malcolm<br>Marine Biologist<br>Port Elizabeth Museum<br>South Africa                                                        | Smid, Hans<br>Senior researcher entomology<br>Wageningen University<br>Netherlands (the)                                 |
| Smit, Christian<br>Associate Professor, Conservation Ecology<br>University of Groningen<br>Netherlands (the)                        | Smit, Harry<br>honorary research fellow<br>Naturalis Biodiversity Center<br>Netherlands (the)                                      | Smit, Sjoerd<br>Teacher<br>ROC Amsterdam / Joke Smit College<br>Netherlands (the)                                        |
| Smit, Willem J<br>Lecturer in zoology<br>University of Limpopo<br>South Africa                                                      | Smith, Aaron<br>Assistant Professor, systematic entomology<br>Northern Arizona University<br>United States of America (the)        | Smith, Adam<br>George Washington University<br>United States of America (the)                                            |
| Smith, Adam<br>Assistant Scientist in Global Change Conservation<br>Missouri Botanical Garden<br>United States of America (the)     | Smith, Bradley<br>Senior Lecturer in Psychology<br>Central Queensland University<br>Australia                                      | Smith, Brent<br>Professor of Biology<br>Earlham College<br>United States of America (the)                                |

|                                                                                                                                                |                                                                                                                                                            |                                                                                                                                                                 |
|------------------------------------------------------------------------------------------------------------------------------------------------|------------------------------------------------------------------------------------------------------------------------------------------------------------|-----------------------------------------------------------------------------------------------------------------------------------------------------------------|
| Smith, Chelsea Reventos<br>Field Researcher (Ecology & Conservation/Zoology)<br>Monash University<br>Australia                                 | Smith, Daniel<br>Research Associate/Graduate Research Faculty in the<br>Dept of Biology<br>University of Central Florida<br>United States of America (the) | Smith, Diorene<br>Doctor in Veterinarian Medicine<br>Panama                                                                                                     |
| Smith, Dr. Jennifer<br>Ecologist<br>Technical and Further Education South Australia<br>Australia                                               | Smith, Emily<br>Assistant Professor of Biology<br>Earlham College<br>United States of America (the)                                                        | Smith, Gideon<br>Honorary Professor<br>Nelson Mandela University<br>South Africa                                                                                |
| Smith, Graham<br>Senior Lecturer Environmental Biology<br>Bath Spa University<br>United Kingdom of Great Britain and Northern Ireland<br>(the) | Smith, James<br>PhD<br>Australia                                                                                                                           | Smith, Jeffrey<br>Ecology<br>Advocates for Snake Preservation<br>United States of America (the)                                                                 |
| Smith, Jenny<br>MSc Student<br>University of Victoria<br>Canada                                                                                | Smith, Jonathan<br>Biologist<br>Australia                                                                                                                  | Smith, Judy<br>Ecological Consultant<br>Australia                                                                                                               |
| Smith, Kathryn<br>Bachelor of Science (Environmental Management)<br>Monash University<br>Australia                                             | Smith, L David<br>Professor, Biological Sciences<br>Smith College<br>United States of America (the)                                                        | Smith, Marielle<br>Postdoctoral Research Associate<br>Michigan State University<br>United States of America (the)                                               |
| Smith, Matthew<br>Restoration botanist<br>USDA Forest Service<br>United States of America (the)                                                | Smith, Michael<br>Graduate Student - Neurobiology and Behavior<br>Cornell University<br>United States of America (the)                                     | Smith, Patricia<br>MS, DVM, PhD, Diplomate American College of<br>Veterinary Ophthalmologists<br>Animal Eye Care<br>United States of America (the)              |
| Smith, Paul<br>Zoologist<br>FAUNA Paraguay and Para la Tierra<br>Paraguay                                                                      | Smith, Pete<br>Professor of Soils & Global Change<br>University of Aberdeen<br>United Kingdom of Great Britain and Northern Ireland<br>(the)               | Smith, Ricardo<br>Full Professor<br>UNIFESP<br>Brazil                                                                                                           |
| Smith, Richard<br>Associate Director / ecologist<br>United Kingdom of Great Britain and Northern Ireland<br>(the)                              | Smith, Robin<br>Senior Research Scientist<br>NCAS-Climate, University of Reading<br>United Kingdom of Great Britain and Northern Ireland<br>(the)          | Smith, Roger<br>retired agricultural research adviser<br>UK Dept. of International Development<br>United Kingdom of Great Britain and Northern Ireland<br>(the) |
| Smith, Sophie<br>United Kingdom of Great Britain and Northern Ireland<br>(the)                                                                 | Smith, Stanley<br>Professor Emeritus<br>University of Nevada, Las Vegas<br>United States of America (the)                                                  | Smith, Stephanie<br>Researcher/ Technician<br>Scripps Institution of Oceanography<br>United States of America (the)                                             |

|                                                                                                                                                                                                                                                                      |                                                                                                                                                  |                                                                                                                                                              |
|----------------------------------------------------------------------------------------------------------------------------------------------------------------------------------------------------------------------------------------------------------------------|--------------------------------------------------------------------------------------------------------------------------------------------------|--------------------------------------------------------------------------------------------------------------------------------------------------------------|
| Smith, Steve<br>Head of Molecular Genetics<br>Dept. Integrative Biology and Evolution, University of<br>Veterinary Medicine, Vienna<br>Austria                                                                                                                       | Smith, Steven<br>Associate Professor<br>University of Arizona<br>United States of America (the)                                                  | Smith, Stuart<br>Post-doctorate researcher<br>NTNU<br>Norway                                                                                                 |
| Smith, Tanzi<br>Honorary Associate<br>Institute for Sustainable Futures, University of<br>Technology Sydney<br>Australia                                                                                                                                             | Smith, Tessa<br>University of Tasmania<br>Australia                                                                                              | Smith, Thomas<br>Professor and Director<br>UCLA<br>United States of America (the)                                                                            |
| Smith, Tobias<br>Lecturer<br>Queensland University of Technology<br>Australia                                                                                                                                                                                        | Smith, Tonya<br>PhD Student<br>University of British Columbia<br>Canada                                                                          | Smith, Tyler<br>Associate Professor of Marine Biology<br>University of the Virgin Islands<br>Virgin Islands (U.S.)                                           |
| Smith, Wesley<br>Seabird research & conservation<br>United Kingdom of Great Britain and Northern Ireland<br>(the)                                                                                                                                                    | Smith, William K<br>Assistant Professor<br>University of Arizona<br>United States of America (the)                                               | Smith, Winston<br>Principal Research Scientist<br>University of Alaska - Fairbanks<br>United States of America (the)                                         |
| Smithers, Richard J.<br>Knowledge Leader: Ecosystems<br>Ricardo Energy & Environment<br>United Kingdom of Great Britain and Northern Ireland<br>(the)                                                                                                                | Smith-Flueck, Jo Anne<br>Research Scientist<br>Laboratorio de Teriogenología, Fac. Cs. Agrarias-Univ.<br>Nac. Comahue, Cinco Saltos<br>Argentina | Smith-Ramirez, Cecilia<br>Titular Professor in Ecology<br>Universidad de Los Lagos<br>Chile                                                                  |
| Smits, Arne<br>EMBL Heidelberg<br>Germany                                                                                                                                                                                                                            | Smits, Morgan<br>PhD Student<br>Institut Universitaire Européen de la Mer<br>France                                                              | Smucker, Alvin<br>Professor of Soil Biophysics/ SWRT a Green Water<br>Conservation Technology<br>Michigan State University<br>United States of America (the) |
| Smykla, Jerzy<br>Assistant Professor UNCW<br>Department of Biodiversity, Institute of Nature<br>Conservation, Polish Academy of Sciences, Kraków,<br>Poland & Department of Biology and Marine Biology,<br>University of North Carolina at Wilmington, USA<br>Poland | Smyth, William<br>Professor, oceanography<br>Oregon State University<br>United States of America (the)                                           | Snaddon, Kate<br>Freshwater Ecologist<br>Freshwater Research Centre<br>South Africa                                                                          |
| Snelgrove, Paul<br>Professor<br>Memorial University of Newfoundland<br>Canada                                                                                                                                                                                        | Snell, Katherine<br>Center for Macroecology, Evolution and Climate<br>Denmark                                                                    | Snell, Rebecca<br>Assistant Professor, Environmental and Plant Biology<br>Ohio University<br>United States of America (the)                                  |

|                                                                                                                                            |                                                                                                                                                     |                                                                                                                                                                   |
|--------------------------------------------------------------------------------------------------------------------------------------------|-----------------------------------------------------------------------------------------------------------------------------------------------------|-------------------------------------------------------------------------------------------------------------------------------------------------------------------|
| Snelling, Jacob<br>Faculty Research Assistant, Horticulture<br>Oregon State University<br>United States of America (the)                   | Snijders, Lysanne<br>Postdoctoral Researcher / Behavioural Ecology<br>Leibniz Association<br>Germany                                                | Snoeijs-Leijonmalm, Pauline<br>Professor of Marine Ecology<br>Stockholm University<br>Sweden                                                                      |
| Snoeks, Jos<br>Professor / Ichthyology<br>Royal Museum for Central Africa and KU Leuven<br>Belgium                                         | Snower, Dennis *<br>President<br>Kiel Institute for the World Economy<br>Germany                                                                    | Snyder, Darrel<br>Research Scientist (retired), Ichthyology<br>Colorado State University<br>United States of America (the)                                        |
| Snyder MD FAAN, Bruce D<br>Neuroscience Neurology<br>Health Professionals for a Healthy Climate (MN-USA)<br>United States of America (the) | Soares, António<br>Professor o Ecology<br>University of the Azores<br>Portugal                                                                      | Soares, Carmen Lucia *<br>Professor<br>UNICAMP<br>Brazil                                                                                                          |
| Soares, Vinicius<br>Brazil                                                                                                                 | Soares Rippel, Mellis Layra<br>Brazil                                                                                                               | Soares-Gomes, Abilio<br>Professor<br>Universidade Federal Fluminense<br>Brazil                                                                                    |
| Sobek, Sebastian<br>Associate Professor, Limnology<br>Uppsala University<br>Sweden                                                         | Sõber, Virve<br>Researcher, Ecology<br>University of Tartu<br>Estonia                                                                               | Šobotník, Jan<br>Assist. Prof. / Entomology<br>Czech University of Life Sciences<br>Czech Republic (the)                                                          |
| Sobral, Mar<br>Researcher Ecology<br>CNRS<br>France                                                                                        | Sobreira Lopes, Rita *<br>Full Professor<br>Universidade Federal do Rio Grande do Sul<br>Brazil                                                     | Sobrino, Francisco<br>Research Professor<br>CSIC<br>Spain                                                                                                         |
| soccodato, alice<br>Researcher, PhD in Marine Sciences<br>CNES<br>France                                                                   | Socolar, Jacob<br>Postdoctoral Fellow, Ecology and Evolutionary Biology<br>University of Connecticut<br>United States of America (the)              | Sodré, Elder<br>PhD student in Ecology<br>Universidade Federal do Rio de Janeiro<br>Brazil                                                                        |
| Soetaredjo, Felycia Edi *<br>Vice Dean I - Chemical Engineering<br>Widya Mandala Catholic University Surabaya<br>Indonesia                 | Sofonea, Mircea T.<br>Teacher<br>University of Montpellier<br>France                                                                                | Sofonia, Jeremy<br>Marine Science/Remote Sensing<br>University of Queensland<br>Australia                                                                         |
| Soh, Malcolm Chu Keong<br>PhD Candidate<br>University of Western Australia<br>Singapore                                                    | Sohel, Md Shawkat Islam *<br>PhD Research Fellow, School of Agriculture and Food<br>Science<br>The University of Queensland, Australia<br>Australia | Sokol, Eric<br>Research Scientist (Quantitative Ecologist)<br>National Ecological Observatory Network, Battelle<br>Ecology Inc.<br>United States of America (the) |



|                                                                                                                                                |                                                                                                                                           |                                                                                                                                                     |
|------------------------------------------------------------------------------------------------------------------------------------------------|-------------------------------------------------------------------------------------------------------------------------------------------|-----------------------------------------------------------------------------------------------------------------------------------------------------|
| Sokol, Martin<br>Associate Professor in Geography<br>Trinity College Dublin<br>Ireland                                                         | Sokolove, Phillip<br>Professor of Biological Sciences, retired<br>University of Maryland, Baltimore Co.<br>United States of America (the) | Solan, Martin<br>Professor in marine ecology<br>University of Southampton<br>United Kingdom of Great Britain and Northern Ireland<br>(the)          |
| Solberg, Svein Øivind<br>Norway                                                                                                                | Soldatini, Cecilia<br>Researcher - Seabird ecology<br>CICESE<br>Mexico                                                                    | Sole, Montserrat<br>Researcher<br>CSIC<br>Spain                                                                                                     |
| Solé-Benet, Albert<br>Soil Science<br>CSIC (Spanish National Research Council)<br>Spain                                                        | Sole-Cava, Antonio<br>Professor<br>Rio de Janeiro Federal University<br>Brazil                                                            | Soler, Ana Josefa<br>Professor<br>UCLM<br>Spain                                                                                                     |
| Soler, Jose M<br>Professor of Condensed Matter Physics<br>Universidad Autonoma de Madrid<br>Spain                                              | Soler, Juan José<br>Professor<br>Consejo Superior de Investigaciones Científicas (CSIC)<br>Spain                                          | Soler Hurtado, M Mar *<br>PhD Biology<br>Spain                                                                                                      |
| Soleri, Daniela<br>Associate Research Scientist<br>University of California, Santa Barbara<br>United States of America (the)                   | Solis, Patricia<br>Research Associate Professor of Geography<br>Texas Tech University<br>United States of America (the)                   | Solís, Velia<br>profesora Emérita Chemistry<br>FAcultad de Ciencias Químicas Universidad Nacional de<br>Córdoba<br>Argentina                        |
| SOLIS-WEISS, VIVIANNE<br>PROFESSOR, PhD, HEAD OF RESEARCH LAB, BIOLOGICAL<br>OCEANOGRAPHY<br>UNIVERSIDAD NACIONAL AUTONOMA DE MEXICO<br>Mexico | Soliveres Codina, Santiago<br>Postdoctoral researcher/ Ecology<br>University of Bern<br>Switzerland                                       | Solomon, Matthew<br>Marketing Student<br>Tulane University<br>United States of America (the)                                                        |
| Som, Sitha<br>Technical Advisor<br>Wildlife Conservation Society<br>Cambodia                                                                   | Somaweera, Ruchira<br>Postdoctoral Fellow<br>Australia                                                                                    | SOME DAO, Madjelia Cangré Ebou<br>Researcher Climate change<br>institut de l'Environnement et de recherche<br>agricole/Burkina Faso<br>Burkina Faso |
| Somers, Ann Berry *<br>Senior Lecturer in Biology<br>University of North Carolina at Greensboro<br>United States of America (the)              | Somers, Michael<br>Professor of Wildlife Management<br>Mammal Research Institute, University of Pretoria<br>South Africa                  | Somma, Francesca<br>Scientific Officer<br>European Commission, Joint Research Centre<br>Italy                                                       |

|                                                                                                                                                                                          |                                                                                                                                                            |                                                                                                                                                    |
|------------------------------------------------------------------------------------------------------------------------------------------------------------------------------------------|------------------------------------------------------------------------------------------------------------------------------------------------------------|----------------------------------------------------------------------------------------------------------------------------------------------------|
| Somma, Louis A.<br>Consultant and Volunteer Collections Assistant,<br>Herpetology Division<br>Florida Museum of Natural History, University of Florida<br>United States of America (the) | Sommer, Christoph<br>Development Economist<br>German Development Institute<br>Germany                                                                      | Sommer, Elisabeth<br>Linguistics Professor<br>UCF<br>United States of America (the)                                                                |
| Sommer, Oliver<br>Phd student<br>Westfälische Wilhelms Universität Münster<br>Germany                                                                                                    | Sommers, Pacifica<br>Research Associate, Ecology and Evolutionary Biology<br>University of Colorado Boulder<br>United States of America (the)              | Son, Brosethy *<br>GIS Officer<br>Wildlife Conservation Society<br>Cambodia                                                                        |
| Sondermann, Wolfram<br>independent limnologist and entomologist<br>none<br>Germany                                                                                                       | Sonetti, Dario<br>biologist<br>University of Modena and Reggio Emilia<br>Italy                                                                             | Song, Xiao-Peng<br>Geographical Sciences<br>University of Maryland<br>United States of America (the)                                               |
| Sonkoly, Judit<br>Assistant research fellow, Ecology<br>University of Debrecen<br>Hungary                                                                                                | Sonnet, Philippe<br>Professor emeritus, geology and soil science<br>Université catholique de Louvain<br>Belgium                                            | Soofi, Mahmood<br>PhD student in Conservation Biology<br>Workgroup on Endangered Species, Georg-August<br>University Göttingen, Germany<br>Germany |
| Sorbara, Catherine<br>Sorbara<br>United Kingdom of Great Britain and Northern Ireland<br>(the)                                                                                           | Soreng, Robert<br>PhD Research Associate<br>Smithsonian Institution<br>United States of America (the)                                                      | Sorensen, Amanda<br>Postdoctoral Research Associate- Human Ecology<br>University of Nebraska-Lincoln<br>United States of America (the)             |
| Sørensen, Estrid<br>Professor of anthropology of knowledge<br>Ruhr-University Bochum<br>Germany                                                                                          | Sorenson, Michael<br>CAS Associate Dean of the Faculty, Natural Sciences<br>Boston University<br>United States of America (the)                            | Soriano Redondo, Andrea<br>Postdoctoral researcher<br>University of Exeter<br>United Kingdom of Great Britain and Northern Ireland<br>(the)        |
| Soro, Antonella<br>Germany                                                                                                                                                               | Sorokovikova, Ekaterina<br>researcher/Biology<br>Limnological Institution of Siberian Branch of Russian<br>Academy of Sciences<br>Russian Federation (the) | Soros, Ioannis<br>Evolutionary Biologist<br>Greece                                                                                                 |
| Sorrell, Tania<br>Director, Marie Bashir Institute for Infectious Diseases<br>and Biosecurity<br>University of Sydney<br>Australia                                                       | Sorrentino, Fiodor<br>Researcher, Physics<br>INFN<br>Italy                                                                                                 | Sosa, Oscar<br>Postdoctoral Scholar in Oceanography<br>University of Hawaii Manoa<br>United States of America (the)                                |

|                                                                                                                                  |                                                                                                                                                  |                                                                                                                                                                                       |
|----------------------------------------------------------------------------------------------------------------------------------|--------------------------------------------------------------------------------------------------------------------------------------------------|---------------------------------------------------------------------------------------------------------------------------------------------------------------------------------------|
| Sosa, Victor<br>research scientist<br>CINVESTAV Tamaulipas<br>Mexico                                                             | Sosef, Marc S.M.<br>Professor in Biosystematics; Senior Researcher<br>Botanic Garden Meise<br>Belgium                                            | Soskolne, Colin<br>Professor emeritus (Epidemiology); Adjunct Professor,<br>Health Research Institute<br>University of Alberta; University of Canberra<br>Canada                      |
| Soszynski, Ambre<br>Research fellow<br>IMAR-DOP Açores<br>Portugal                                                               | SOTO, MANU<br>Full Prof Cell Biology<br>University of the Basque Country<br>Spain                                                                | Soto Valdés, Ana Zaida<br>Biologist<br>University of Seville<br>Spain                                                                                                                 |
| Soto-Azat, Claudio<br>Director, Research Sustainability Center<br>Universidad Andres Bello<br>Chile                              | souchet, jeremie<br>PhD student<br>CNRS<br>France                                                                                                | Soulas, Antoine<br>Mathematics<br>Ecole Normale Supérieure<br>France                                                                                                                  |
| Soule, Michael *<br>Emeritus Professor<br>University of California, Santa Cruz<br>United States of America (the)                 | Souriau, Abel<br>PhD Student in Behavioural Ecology<br>Charles University in Prague, Department of Ecology<br>Czech Republic (the)               | Sousa, Arturo<br>Department of Plant Biology and Ecology<br>University of Seville, E-41012 Seville, Spain<br>Spain                                                                    |
| Sousa, Lara<br>Post-Doctoral Researcher<br>University of Oxford<br>United Kingdom of Great Britain and Northern Ireland<br>(the) | SOUSA, LOUISA<br>PROFESSOR/ GENETICS<br>UNIVERSIDADE FEDERAL DA PARAIBA<br>Brazil                                                                | Sousa, Ronaldo *<br>Professor<br>CBMA – Centre of Molecular and Environmental Biology,<br>Department of Biology, University of Minho, Campos de<br>Gualtar, 4710-057 Braga, Portugal. |
| Sousa Neves, Tiago<br>PhD student<br>MPEG (Brasil) / CIBIO-InBIO (Portugal)<br>Portugal                                          | Sousa Passos, Carlos José<br>Associate Professor<br>University of Brasília<br>Brazil                                                             | Sousa-Lima, Renata<br>Assistant Professor of Animal Behavior<br>Universidade Federal do Rio Grande do Norte<br>Brazil                                                                 |
| Sousa-Silva, Rita<br>PhD candidate<br>KU Leuven<br>Belgium                                                                       | Sousa-Souto, Leandro<br>Professor<br>Federal University of Sergipe<br>Brazil                                                                     | Souter, Nicholas<br>Past President - Royal Society of South Australia,<br>conservation science<br>Conservation International<br>Australia                                             |
| Southgate, F<br>Living Landscape Advisor<br>United Kingdom of Great Britain and Northern Ireland<br>(the)                        | Souto Martins Teixeira, Tiago<br>PhD student<br>Queen Mary University of London<br>United Kingdom of Great Britain and Northern Ireland<br>(the) | Souza, Brayan<br>Universidade Federal de São Carlos<br>Brazil                                                                                                                         |
| Souza, Diorge Paulo<br>Research associate / Biochemistry<br>University of Sao Paulo<br>Brazil                                    | Souza, Franco<br>Professor<br>Universidade Federal de Mato Grosso do Sul<br>Brazil                                                               | Souza, Joice<br>Master in Ocean and Earth Dynamics<br>Universidade Federal Fluminense (UFF)<br>Brazil                                                                                 |

|                                                                                                                                     |                                                                                                                      |                                                                                                                                                                                          |
|-------------------------------------------------------------------------------------------------------------------------------------|----------------------------------------------------------------------------------------------------------------------|------------------------------------------------------------------------------------------------------------------------------------------------------------------------------------------|
| Souza, Jorge<br>Professor/researcher on insect ecology<br>Instituto de Ciências Exatas e Tecnologia em Itacoatiara – ICET<br>Brazil | Souza, Levi<br>Wildlife Biologist<br>California Department of Fish and Wildlife<br>United States of America (the)    | Souza, Maria<br>Professor<br>Universidade Federal do Amazonas<br>Brazil                                                                                                                  |
| Souza, Marilia<br>Speech Language Pathologist<br>UNIFESP<br>Brazil                                                                  | Souza, Priscila<br>Biologo<br>Unip<br>Brazil                                                                         | Souza, Renato<br>PhD student<br>Unicamp<br>Brazil                                                                                                                                        |
| Souza, Rodrigo<br>Zoology<br>Brazil                                                                                                 | Souza, Viviane<br>Post Doctoraç<br>University Federal of Rio de Janeiro<br>Brazil                                    | Souza Alonso, Pablo<br>Postdoctoral Researcher<br>Spain                                                                                                                                  |
| Souza Krupinsk, Bianca<br>Environmental Analyst<br>Brazil                                                                           | Souza Leite, Melina<br>PhD student in Ecology<br>University of São Paulo<br>Brazil                                   | Souza Neto, Joao Aduino<br>Associate Professor<br>Universidade Federal de Pernambuco<br>Brazil                                                                                           |
| Souza Santarem, Leanderson<br>Biologia<br>Universidade do Estado do Amazonas<br>Brazil                                              | Souza-Alves, João Pedro<br>Post-doctoral Researcher<br>Federal University of Pernambuco<br>Brazil                    | Sowers, Derek<br>Oceanography<br>University of New Hampshire<br>United States of America (the)                                                                                           |
| Spach, Henry Louis *<br>Professor<br>Universidade Federal do Paraná<br>Brazil                                                       | Spagnoletti, Noemi *<br>Primatologist<br>Associazione Primatologica Italiana<br>Italy                                | Spangenberg, Joachim H.<br>Senior scientist, economist<br>Helmholtz Centre for Environment Research UFZ<br>Germany                                                                       |
| Spano, Carlos<br>PhD Student<br>Universidad de Concepción<br>Chile                                                                  | Spaolonzi Queiroz Assis, Ana Elisa<br>Profesor Doctor<br>University of Campinas<br>Brazil                            | Spear, Shelley<br>PhD Student - Graduate Research Assistant -<br>Wildlife/Human Dynamics<br>Colorado State University<br>United States of America (the)                                  |
| Specht, David<br>Estuarine ecologist<br>U. S. E. P. A., Retired<br>United States of America (the)                                   | Speck, Franziska<br>Germany                                                                                          | Speert, David<br>Professor Emeritus<br>University of British Columbia<br>Canada                                                                                                          |
| Spehar, Stephanie<br>Associate Professor of Anthropology<br>University of Wisconsin Oshkosh<br>United States of America (the)       | Speich, Sabrina<br>Professor, Climate Sciences, Physical oceanography<br>Ecole Normale Supérieure of Paris<br>France | Speidel, Jordan<br>NIEHS Predoctoral Fellow/Department of Biochemistry<br>and Molecular Biology<br>The University of Texas Medical Branch at Galveston<br>United States of America (the) |

|                                                                                                                      |                                                                                                                                     |                                                                                                                                  |
|----------------------------------------------------------------------------------------------------------------------|-------------------------------------------------------------------------------------------------------------------------------------|----------------------------------------------------------------------------------------------------------------------------------|
| Spence, John<br>Professor Emeritus<br>University of Alberta<br>Canada                                                | Spence, Michael<br>Senior Marine Ecosystem Scientist<br>CEFAs<br>United Kingdom of Great Britain and Northern Ireland (the)         | Spencer, Hugh<br>Conservation biologist<br>Cape Tribulation Tropical Research Station<br>Australia                               |
| Spencer, Olivia<br>Marine Science<br>United Kingdom of Great Britain and Northern Ireland (the)                      | Spencer, Wayne<br>Chief Scientist<br>Conservation Biology Institute<br>United States of America (the)                               | Sperandio, Giorgio<br>Research assistant<br>University of Brescia<br>Italy                                                       |
| Sperber, Suzi<br>Full Professor - Literary Theory<br>DTL-UNICAMP<br>Brazil                                           | Sperfeld, Martin<br>Environmental Microbiologist<br>Friedrich Schiller University Jena<br>Germany                                   | Sperling, Emily<br>Australia                                                                                                     |
| Speziale, Karina<br>Researcher in Ecology<br>CONICET<br>Argentina                                                    | Spicer, John<br>Professor of Marine Zoology<br>University of Plymouth<br>United Kingdom of Great Britain and Northern Ireland (the) | Spidle, Adrian<br>Population Geneticist<br>Northwest Indian Fisheries Commission<br>United States of America (the)               |
| Spielberg, Yitzhak<br>Israel                                                                                         | Spielmann, Adriano<br>Associate Professor<br>UFMS<br>Brazil                                                                         | Spies, Martin<br>Staff scientist in Entomology - Diptera<br>Zoological Collections of the State of Bavaria<br>Germany            |
| Spies, Narrissa<br>Researcher, Coral Molecular Biology<br>Kewalo Marine Laboratory<br>United States of America (the) | Spiess, Martin<br>Ornithologist<br>Swiss Ornithological Institute<br>Switzerland                                                    | Spijker, Stephanie Nuria<br>Doctoral Researcher - Geography<br>KU Leuven<br>Belgium                                              |
| spiroux de vendomois, Joel *<br>Doctor<br>CRIIGEN<br>France                                                          | Spooner, Frank<br>Biological Research Station/ Nature Reserve Manager<br>Cloudbridge<br>Costa Rica                                  | Sposimo, Paolo<br>Consultant in projects of nature conservation<br>NEMO Ltd - Florence<br>Italy                                  |
| Šprem, Nikica<br>associate professor<br>University of Zagreb Faculty of Agriculture<br>Croatia                       | Spring, Malisa<br>Entomologist<br>United States of America (the)                                                                    | Springer, Andrea<br>Postdoctoral Researcher<br>Institute for Parasitology, University of Veterinary Medicine Hannover<br>Germany |
| Springer, Vanessa<br>Cornell University<br>United States of America (the)                                            | Squeo, Francisco<br>Ecologist<br>Universidad de La Serena<br>Chile                                                                  | Srbek-Araujo, Ana Carolina<br>Full Professor<br>Universidade Vila Velha<br>Brazil                                                |

|                                                                                                             |                                                                                                                                                                      |                                                                                                                |
|-------------------------------------------------------------------------------------------------------------|----------------------------------------------------------------------------------------------------------------------------------------------------------------------|----------------------------------------------------------------------------------------------------------------|
| Sreenivas, Shubha<br>Psychology<br>NHS<br>United Kingdom of Great Britain and Northern Ireland (the)        | Srinivas, Sujatha<br>PhD candidate in Marine Microbiology<br>Institute for Chemistry and Biology of the Marine Environment, Carl-von-Ossietzky University<br>Germany | Srinivasan, Shashank<br>India                                                                                  |
| Srivastava, Monika<br>ANU<br>Australia                                                                      | St Clair, James<br>Postdoc, behavioural ecology<br>University of St Andrews<br>United Kingdom of Great Britain and Northern Ireland (the)                            | St John, R. Dennis<br>Animal Behaviour & Ecology, Lecturer & consultant<br>Retired, Okanagan College<br>Canada |
| St.Pierre, Jasmine<br>Aquatic ecologist<br>University of Windsor<br>Canada                                  | Staab, Michael<br>Assistant Professor / Ecology<br>University of Freiburg<br>Germany                                                                                 | Staaks, Georg<br>Senior Scientist / Fisheries Biology<br>IGB Berlin<br>Germany                                 |
| Stachowiak, Chad<br>Masters Candidate, Ecology<br>University of Tennessee<br>United States of America (the) | Stachowic, Izabela<br>PhD student in ecology<br>Instituto Venezolano de Investigaciones Cientificas<br>Venezuela (Bolivarian Republic of)                            | Stachowski, Sabine<br>Researcher - Marine ecotoxicology<br>Ifremer<br>France                                   |
| Stafford Smith, Mark<br>Systems ecologist<br>CSIRO<br>Australia                                             | Stafforini, Silvia<br>Language Teaching and tutoring<br>Retired<br>Brazil                                                                                            | STAHL, Clément<br>Researcher<br>INRA<br>French Guiana                                                          |
| Stahler, Daniel<br>Wildlife Biologist<br>National Park Service<br>United States of America (the)            | Stalder, Kathryn<br>Veterinarian<br>Australia                                                                                                                        | Stallsmith, Bruce<br>Aquatic Ecology<br>University of Alabama in Huntsville<br>United States of America (the)  |
| Stals, Riaan<br>Beetle taxonomist<br>South African National Collection of Insects<br>South Africa           | Stambler, Noga<br>Coral reef ecology, marine biology, HAB biology<br>Israel                                                                                          | STAMMITTI, Linda<br>ingénieure biologie végétale<br>Université de Bordeaux<br>France                           |
| Staneva, Anna<br>Species Conservation Officer<br>United Kingdom of Great Britain and Northern Ireland (the) | Stanisci, Angela<br>associate professor<br>University of Molise<br>Italy                                                                                             | Stanish, Lee<br>Staff Scientist<br>Stanish<br>United States of America (the)                                   |
| Stanley, Dara<br>Lecturer in Plant Ecology<br>National University of Ireland Galway<br>Ireland              | Stanley, Lauren<br>Graduate Student, Ecology and Evolutionary Biology<br>University of Connecticut<br>United States of America (the)                                 | Stanley, Margaret<br>Senior Lecturer<br>University of Auckland<br>New Zealand                                  |

|                                                                                                                                                              |                                                                                                                         |                                                                                                                                                              |
|--------------------------------------------------------------------------------------------------------------------------------------------------------------|-------------------------------------------------------------------------------------------------------------------------|--------------------------------------------------------------------------------------------------------------------------------------------------------------|
| Stark, Jonathan<br>Senior Research Scientist/Marine ecology<br>Australian Antarctic Division<br>Australia                                                    | Stark, Keila<br>Student, Marine Ecology<br>University of British Columbia<br>Canada                                     | Stark, Scott<br>Environmental Chemist<br>Australian Antarctic Division<br>Australia                                                                          |
| Starmer, John<br>Marine Ecology<br>United States of America (the)                                                                                            | Starnberger, Iris<br>PhD candidate, Zoology<br>University of Vienna<br>Austria                                          | Starnes, Wayne<br>Research Curator<br>North Carolina Museum of Natural Sciences (Retired)<br>United States of America (the)                                  |
| Starzomski, Brian<br>Professor<br>University of Victoria<br>Canada                                                                                           | stasheff, jim<br>Professor Emeritus Math<br>UNC-CH<br>United States of America (the)                                    | Staudacher, Philipp<br>PhD Student, Environmental Health Economics<br>Eawag - Swiss Federal Institute of Aquatic Sciences and<br>Technologies<br>Switzerland |
| STAUFFER VIVEROS, RAQUEL<br>Plant Biology<br>Universidade Federal de Minas Gerais<br>Brazil                                                                  | Staverløkk, Arnstein<br>Entomologist<br>Norwegian Institute for Nature Research<br>Norway                               | Stavnezer, Janet<br>Professor Emeritus/Immunologist<br>Univ of Massachusetts Medical School<br>United States of America (the)                                |
| Stebbing, Simon<br>Associate Professor, Department of Medicine<br>Dunedin School of Medicine, University of Otago,<br>Dunedin<br>New Zealand                 | Stec, Daniel<br>PhD student<br>Institute of Zoology and Biomedical Research,<br>Jagiellonian University<br>Poland       | Steel, Duncan *<br>Professor EECS/Physics/Biophysics<br>Univ Michigan<br>United States of America (the)                                                      |
| Steele, Dale<br>Program Manager Nongame Wildlife Program, retired<br>California Department of Fish and Wildlife<br>United States of America (the)            | Steele, Mark<br>Professor / Marine Biology<br>California State University, Northridge<br>United States of America (the) | Steen, Valerie<br>Post-doctoral Researcher<br>University of Connecticut<br>United States of America (the)                                                    |
| Steenbeek, Jeroen<br>R&D, ecological modelling<br>Ecopath International Initiative<br>Spain                                                                  | Steensma, Joseph<br>Professor of Environmental Health<br>Washington University<br>United States of America (the)        | Steer, Andrew<br>Associate Professor<br>University of Melbourne<br>Australia                                                                                 |
| Steer, Mark<br>Senior Lecturer in Conservation Ecology<br>University of the West of England<br>United Kingdom of Great Britain and Northern Ireland<br>(the) | Stefanaki, Anastasia<br>Postdoctoral researcher<br>Naturalis Biodiversity Center<br>Netherlands (the)                   | STEFANO, GREGO *<br>FULL PROFESSOR<br>WORLD AGRICULTURAL HERITAGE FOUNDATION<br>Italy                                                                        |

|                                                                                                                                                                      |                                                                                                                                      |                                                                                                                                                                                                                                        |
|----------------------------------------------------------------------------------------------------------------------------------------------------------------------|--------------------------------------------------------------------------------------------------------------------------------------|----------------------------------------------------------------------------------------------------------------------------------------------------------------------------------------------------------------------------------------|
| Stefanoudis, Paris<br>Postdoctoral Researcher<br>Nekton Nekton Oxford Deep Ocean Research Institute<br>United Kingdom of Great Britain and Northern Ireland<br>(the) | Stefansson, Halldor<br>Programme manager/Science and Society<br>EMBL<br>Germany                                                      | Stefansson, Robert<br>Director<br>West Iceland Nature Research Centre<br>Iceland                                                                                                                                                       |
| Steffen, Will<br>Emeritus Professor, Earth System science<br>Australian National University<br>Australia                                                             | Štefunková, Dagmar<br>Landscape ecology<br>Slovak academy of Sciences<br>Slovakia                                                    | Stein, Anke<br>Postdoctoral researcher, Ecology<br>University of Konstanz<br>Germany                                                                                                                                                   |
| Stein, David<br>Research Assistant<br>Oregon State University<br>United States of America (the)                                                                      | Stein, Diana<br>Professor emeritus<br>Mount Holyoke College<br>United States of America (the)                                        | Stein, Janet<br>Ecologist<br>Fenner School of Environment and Society, Australian<br>National University<br>Australia                                                                                                                  |
| Stein, Lukas<br>Climate Scientist/Wind power engineer<br>UL DEWI<br>Germany                                                                                          | Stein, Robert<br>Professor Emeritus of Mathematics<br>California State University, San Bernardino<br>United States of America (the)  | Steiner, William<br>CoFounder and General Manager, Hawaii Oil Seed<br>Producers LLC, Ph.D. Genetics<br>formerly Dean, College of Agriculture, Forestry and<br>Natural Resources, Univ of Hawaii-Hilo<br>United States of America (the) |
| Steinhäuser, Andre<br>aquatic ecologist<br>Germany                                                                                                                   | Steinheimer, Frank<br>Head, Natural Sciences Collections<br>Martin Luther University Halle-Wittenberg<br>Germany                     | Steinke, Dirk<br>Adjunct Professor, Biodiversity Genomics<br>University of Guelph - Integrative Biology<br>Canada                                                                                                                      |
| Steinmann, Kimberly<br>Research Scientist<br>California Department of Pesticide Regulation<br>United States of America (the)                                         | Steinmetz, Lars<br>EMBL, Heidelberg<br>Germany                                                                                       | Steinmetz, Robert<br>ecologist<br>WWF<br>Thailand                                                                                                                                                                                      |
| Steinmetz, Robert<br>ecologist<br>WWF<br>United States of America (the)                                                                                              | Steinmetz, Tilmann<br>Ocean Geology<br>NIWA (National Institute of Water and Atmospheric<br>Research)<br>New Zealand                 | Steinmetz, Zacharias<br>Environmental and Soil Chemistry<br>University of Koblenz-Landau<br>Germany                                                                                                                                    |
| Steltzer, Heidi<br>Associate Professor<br>Fort Lewis College<br>United States of America (the)                                                                       | Stengel, Carrie<br>Data & Metrics Manager in Wildlife Conservation<br>Global Wildlife Conservation<br>United States of America (the) | Stenhouse, Alan<br>Applied Ecology & Conservation<br>University of Adelaide<br>Australia                                                                                                                                               |



|                                                                                                                                          |                                                                                                                             |                                                                                                                                                             |
|------------------------------------------------------------------------------------------------------------------------------------------|-----------------------------------------------------------------------------------------------------------------------------|-------------------------------------------------------------------------------------------------------------------------------------------------------------|
| Stenøien, Hans K.<br>Professor of biology<br>Norwegian University of Science and Technology<br>Norway                                    | Stephan, Katharina<br>PhD candidate<br>IBU, University of Oldenburg<br>Germany                                              | Stephan, Pierre<br>Researcher in Environmental Geography<br>CNRS<br>France                                                                                  |
| Stephan, Susanne<br>PhD student of aquatic ecology<br>Leibniz-Institute of Freshwater Ecology and Inland<br>Fisheries<br>Germany         | Stephane, Ursula<br>Canada                                                                                                  | Stephen, Bruce<br>Biology<br>United States of America (the)                                                                                                 |
| Stephens, Nicholas<br>Environmental Consultant<br>Nereis Bioengineering<br>United Kingdom of Great Britain and Northern Ireland<br>(the) | Stephens, Philip<br>Reader in Ecology<br>Durham University<br>United Kingdom of Great Britain and Northern Ireland<br>(the) | Stephens, Richard *<br>Retired<br>Retired<br>South Africa                                                                                                   |
| Stephens, Robert<br>United States of America (the)                                                                                       | Stephens, Tim<br>Professor of International Law and ARC Future Fellow<br>University of Sydney<br>Australia                  | Stephenson, Janet<br>Social scientist and Director, Centre for Sustainability<br>University of Otago<br>New Zealand                                         |
| Stephenson, Jessica<br>Research Fellow<br>ETH Zürich (Swiss Federal Institute of Technology)<br>Switzerland                              | stephenson, una<br>psychiatrist ..... recently retired<br>FRANZCP<br>Australia                                              | Stepien, Elzbieta<br>Member of Parliament<br>Sejm<br>Poland                                                                                                 |
| Stern, Stephen<br>Associate Professor of Biology<br>Colorado Mesa University<br>United States of America (the)                           | Sterner, Thomas<br>Profesor of Environmental economics<br>Economics<br>Sweden                                               | Sterry, Melissa<br>Design Scientist & Systems Theorist<br>University of Greenwich, London.<br>United Kingdom of Great Britain and Northern Ireland<br>(the) |
| Stervander, Martin<br>Postdoctoral researcher, PhD in Evolutionary Biology<br>University of Oregon<br>United States of America (the)     | Stet, Thomas<br>Professor of Biochemistry<br>Yale, University<br>United States of America (the)                             | Stevens, Jens<br>Postdoctoral Scholar, Fire Ecology<br>University of California, Berkeley<br>United States of America (the)                                 |
| Stevens, Madison<br>Graduate Student in Resources, Environment and<br>Sustainability<br>University of British Columbia<br>Canada         | Stevens, Mark<br>Assoc. Prof.<br>University of South Australia<br>Australia                                                 | Stevens, Nicola<br>Ecologist<br>Stellenbosch University<br>South Africa                                                                                     |
| Stevens, Sara<br>Ecologist<br>University of Rhode Island<br>United States of America (the)                                               | Stevenson, Amy<br>Wildlife toxicologist and Nurse practitioner<br>United States of America (the)                            | Stevenson, Angela<br>Postdoc Marine Sciences<br>University of British Columbia<br>Canada                                                                    |

|                                                                                                                                               |                                                                                                                                                                     |                                                                                                                                     |
|-----------------------------------------------------------------------------------------------------------------------------------------------|---------------------------------------------------------------------------------------------------------------------------------------------------------------------|-------------------------------------------------------------------------------------------------------------------------------------|
| Stevenson, Kim<br>Professor of law<br>Plymouth University<br>United Kingdom of Great Britain and Northern Ireland (the)                       | Stevenson, Pablo<br>Professor<br>Universidad de Los Andes<br>Colombia                                                                                               | Stevenson, Robert D<br>Associate Professor of Biology<br>University of Massachusetts Boston<br>United States of America (the)       |
| Stevenson, Sofia<br>Medical biology<br>Bangor university<br>United Kingdom of Great Britain and Northern Ireland (the)                        | Steward, Ivan<br>Senior Environmental Scientist<br>Tetra Tech<br>New Zealand                                                                                        | Stewart, Alan<br>Senior Lecturer in Ecology<br>University of Sussex<br>United Kingdom of Great Britain and Northern Ireland (the)   |
| Stewart, Bryce<br>Lecturer in Marine Ecosystem Management<br>University of York<br>United Kingdom of Great Britain and Northern Ireland (the) | Stewart, Claire<br>PhD Biodiversity Management<br>University of Kent<br>United Kingdom of Great Britain and Northern Ireland (the)                                  | Stewart, Emma<br>Environment Forester<br>Forestry Commission Scotland<br>United Kingdom of Great Britain and Northern Ireland (the) |
| Stewart, Frances<br>PhD Candidate wildlife biology<br>Canada                                                                                  | Stewart, Joshua<br>Software Engineer<br>United States of America (the)                                                                                              | STEWART, Nola<br>Retired High School Science Teacher<br>Nil<br>Australia                                                            |
| stewart, simone<br>Senior Hydrogeologist<br>Department of Environment, Water and Natural Resources<br>Australia                               | Steyn, Vernon<br>PhD student Conservation Ecology and Entomology<br>Stellenbosch Universtiy<br>South Africa                                                         | Sthel, Marcelo<br>Professor/Environmental<br>Universidade Estadual Norte Fluminense<br>Brazil                                       |
| Stiehl-Alves, Eudes Maria<br>Post-Doc position in Botanical department<br>Universidade Federal do Rio Grande do Sul<br>Brazil                 | Stift, Marc<br>Assistant Professor<br>University of Konstanz<br>Germany                                                                                             | Stigall, Alycia<br>Professor of Geological Sciences<br>Ohio University<br>United States of America (the)                            |
| Stigner, Madeleine<br>Research Assistant, Conservation Biology<br>University of Queensland<br>Australia                                       | Stiles, Elena<br>Graduate Student<br>Pennsylvania State University<br>United States of America (the)                                                                | Still, Christopher<br>Associate Professor of Forest Ecosystem Ecology<br>Oregon State University<br>United States of America (the)  |
| Stiller, Volker<br>Associate Professor Plant Ecophysiology<br>Southeastern Louisiana University<br>United States of America (the)             | Stillman, Jonathon<br>Professor, Environmental Physiology<br>San Francisco State University and University of California Berkeley<br>United States of America (the) | Stocker, Martina<br>Animal Behaviour<br>University of Vienna<br>Austria                                                             |
| Stoddard, Philip<br>Professor, Biological Sciences<br>Florida International University<br>United States of America (the)                      | Stoel, Peter<br>Wildlife biologu<br>United States of America (the)                                                                                                  | Stoett, Peter<br>Dean of Social Sciences & Humanities<br>University of Ontario Institute of Technology<br>Canada                    |

|                                                                                                                                            |                                                                                                                                     |                                                                                                                                                   |
|--------------------------------------------------------------------------------------------------------------------------------------------|-------------------------------------------------------------------------------------------------------------------------------------|---------------------------------------------------------------------------------------------------------------------------------------------------|
| Stoev, Pavel<br>Professor of Zoology<br>National Museum of Natural History<br>Bulgaria                                                     | STOICA, ELENA *<br>Senior Scientist<br>National Institute for Marine Research and Development<br>"Grigore Antipa"(NIMRD)<br>Romania | Stojanoska, Vesna<br>Mathematics<br>University of Illinois<br>United States of America (the)                                                      |
| Stokes, Christopher<br>Marine consultant and academic<br>Plymouth University<br>United Kingdom of Great Britain and Northern Ireland (the) | Stokes, Emma<br>Regional Director Central Africa<br>Wildlife Conservation Society<br>Congo (the)                                    | Stokes, Kimberley<br>PhD graduate<br>University of Exeter<br>United Kingdom of Great Britain and Northern Ireland (the)                           |
| Stoll, Alexandra<br>Researcher<br>CEAZA La Serena<br>Chile                                                                                 | Stolyarov, Anna<br>Plants Genetics<br>Institute of Evolution, Haifa University<br>Israel                                            | Stolz, Insa<br>PhD candidate in marine biology<br>i-mar, Universidad de Los Lagos, Puerto Montt, Chile and<br>Geomar, Kiel, Germany<br>Chile      |
| Stone, Joshua<br>Aquatic Ecologist<br>Ohio State University<br>United States of America (the)                                              | Stoner, Elizabeth<br>Ecologist<br>Bentley University<br>United States of America (the)                                              | Storch, Daniela<br>Scientist, Integrative Ecophysiology<br>Alfred-Wegener Institut Helmholtz-Zentrum für Polar-<br>und Meeresforschung<br>Germany |
| Storch, David<br>Professor of ecology<br>Charles University, Prague<br>Czech Republic (the)                                                | Storch, Ilse<br>Professor; Wildlife Ecology, Conservation Biology<br>University of Freiburg<br>Germany                              | Stork, Nigel<br>Emeritus Professor<br>Griffith University<br>Australia                                                                            |
| Stormshak, Fredrick<br>Distinguished Professor Emeritus/ Animal Science<br>Oregon State University<br>United States of America (the)       | Story, Benjamin<br>Bioinformatics Scientist<br>European Molecular Biology Laboratory (EMBL)<br>Germany                              | Stotra Bhashyam, Swetha<br>MSc Wildlife Biology and Conservation<br>National Center For Biological Sciences<br>India                              |
| Stott, Matthew<br>Senior Lecturer, environmental microbiologist<br>University of Canterbury<br>New Zealand                                 | Stouder, Deanna<br>Ecology<br>United States of America (the)                                                                        | Stouffer, Philip<br>Professor, Renewable Natural Resources<br>Louisiana State University<br>United States of America (the)                        |
| Stout, Hannah<br>Conservation Entomologist<br>Independent Researcher<br>United States of America (the)                                     | Stout, Tara<br>Science undergraduate<br>Griffith University<br>Australia                                                            | Stoynova-Bakalova, Ekaterina<br>retire<br>IFRG<br>Bulgaria                                                                                        |
| St-Pierre, Joey<br>Biology<br>INRS-Institut Armand-Frappier<br>Canada                                                                      | Strahm, Wendy<br>Ph.D. Biologist<br>Projet Balbuzard/Nos Oiseaux<br>Switzerland                                                     | Stranges, Silvia<br>PhD student<br>Universidad Autonoma de Baja California Sur<br>Mexico                                                          |

|                                                                                                                                 |                                                                                                                                                                      |                                                                                                                                                                                       |
|---------------------------------------------------------------------------------------------------------------------------------|----------------------------------------------------------------------------------------------------------------------------------------------------------------------|---------------------------------------------------------------------------------------------------------------------------------------------------------------------------------------|
| <p>Strass, Volker<br/>Senior Scientist, Oceanographer, PhD<br/>Alfred-Wegener-Institut, Bremerhaven<br/>Germany</p>             | <p>Strassburg, Bernardo<br/>Assistant Professor<br/>Department of Geography and the Environment,<br/>Pontifical Catholic University of Rio de Janeiro<br/>Brazil</p> | <p>Strasser, Andreas<br/>Professor of Geology<br/>University of Fribourg<br/>Switzerland</p>                                                                                          |
| <p>Stratmann, Cleo Ninja<br/>PhD Student, Limnology<br/>Netherlands Institute of Ecology<br/>Netherlands (the)</p>              | <p>Strauss, Paulaq<br/>Molecular ecologist<br/>South African National Biodiversity Institute<br/>South Africa</p>                                                    | <p>Strauss, Sharon<br/>Professor<br/>University of California Davis<br/>United States of America (the)</p>                                                                            |
| <p>Strauss, Steven<br/>Oregon State University, USA<br/>United States of America (the)</p>                                      | <p>Straussfogel, Dennis<br/>Aerospace Engineering<br/>University of Northern British Columbia<br/>Canada</p>                                                         | <p>Street-Perrott, F. Alayne<br/>Emeritus Professor of Science (Environmental Dynamics)<br/>Swansea University<br/>United Kingdom of Great Britain and Northern Ireland<br/>(the)</p> |
| <p>Streher, Annia<br/>PhD student<br/>Universidade Estadual Paulista- UNESP<br/>Brazil</p>                                      | <p>Strehlow, Brian<br/>PhD Candidate<br/>University of Western Australia<br/>Australia</p>                                                                           | <p>Streicher, Jarryd<br/>MSc Candidate Ecological Science<br/>University of KwaZulu-Natal<br/>South Africa</p>                                                                        |
| <p>Streff, Lara G.<br/>United States of America (the)</p>                                                                       | <p>Streit, Simon<br/>Bachelordegree Physics<br/>Germany</p>                                                                                                          | <p>Stressmann, Franziska<br/>Microbial Ecologist<br/>Leibniz Institute of Freshwater Ecology and Inland<br/>Fisheries<br/>Germany</p>                                                 |
| <p>Strganac, Christopher<br/>Ph.D., Geological Sciences<br/>United States of America (the)</p>                                  | <p>Strier, Karen<br/>Professor, Dept of Anthropology<br/>University of Wisconsin-Madison<br/>United States of America (the)</p>                                      | <p>Stringer, Martin<br/>Research Scientist<br/>University of Queensland<br/>Australia</p>                                                                                             |
| <p>Strittholt, James<br/>President/Executive Director<br/>Conservation Biology Institute<br/>United States of America (the)</p> | <p>Strohbach, Ben<br/>Senior Lecturer: Vegetation Ecology<br/>Namibia University of Science and Technology<br/>Namibia</p>                                           | <p>Strom, Douglas<br/>Environmental Consultant Projrect Scientist/Aquatic<br/>Ecologist<br/>Water &amp; Air Research, Inc.<br/>United States of America (the)</p>                     |
| <p>Stromberg, Dan<br/>Univ lecturer<br/>Biology and Envirobnmental Sciences Univ of Gothenburg<br/>Sweden</p>                   | <p>Stronen, Astrid Vik<br/>Assistant professor, biology<br/>Aalborg University<br/>Denmark</p>                                                                       | <p>Strong, Donald<br/>University of California, Davis<br/>United States of America (the)</p>                                                                                          |

|                                                                                                                                                       |                                                                                                                                                         |                                                                                                                                                                                                 |
|-------------------------------------------------------------------------------------------------------------------------------------------------------|---------------------------------------------------------------------------------------------------------------------------------------------------------|-------------------------------------------------------------------------------------------------------------------------------------------------------------------------------------------------|
| Stropp, Juliana<br>Federal University of Alagoas<br>Brazil                                                                                            | Stroud, Jo<br>Sustainability Advisor<br>Bangor University<br>United Kingdom of Great Britain and Northern Ireland (the)                                 | Struebig, Matthew<br>Senior Lecturer in Conservation Science<br>Durrell Institute of Conservation and Ecology, University of Kent<br>United Kingdom of Great Britain and Northern Ireland (the) |
| Strugnell, Jan<br>Associate Professor, Marine Biology and Aquaculture<br>James Cook University<br>Australia                                           | Struhsaker, Thomas<br>Tropical Ecologist<br>Department of Evolutionary Anthropology, Duke University, Durham, NC, USA<br>United States of America (the) | Strumillo, Marta Julia<br>Predoctoral Fellow, Bioinformatics<br>EMBL-EBI<br>Poland                                                                                                              |
| Struminger, Rhonda<br>Assistant Professor of the Practice, Ecosystem Science and Management<br>Texas A&M University<br>United States of America (the) | Struwig, Madeleen<br>Post-doctoral Researcher<br>University of the Free State<br>South Africa                                                           | Strydom, Hannes<br>Bioinformatician<br>University of Pretoria<br>South Africa                                                                                                                   |
| Strydom, Wilma<br>Senior Researcher<br>CSIR<br>South Africa                                                                                           | Stuart, Celia<br>Entomologist, Operations Manager<br>BioQuip Products Inc<br>United States of America (the)                                             | Stuart, Michael<br>Professor Emeritus of Biology<br>University of North Carolina at Asheville<br>United States of America (the)                                                                 |
| Stubbs, Wendy<br>Team Leader Landscape Ecology<br>Department for Environment, Water and Natural Resources<br>Australia                                | Stucchi, Natale<br>Full Professor, Psychology<br>University of Milano-Bicocca<br>Italy                                                                  | Stucki, Saskia<br>Senior Research Fellow<br>Max Planck Institute for Comparative Public Law and International Law<br>Germany                                                                    |
| Stuhler, John<br>Ecologist<br>Texas Tech University<br>United States of America (the)                                                                 | Stuhlmann, Annalena<br>Sustainability Science<br>Leuphana University<br>Germany                                                                         | Stuhr, Marleen<br>PhD Candidate<br>Leibniz Centre for Tropical Marine Research (ZMT)<br>Germany                                                                                                 |
| Stur, Elisabeth<br>Senior Researcher<br>Norwegian University of Science and Technology<br>Norway                                                      | Sturaro, Marcelo Jose<br>Zoology<br>Museu Paraense Emílio Goeldi<br>Brazil                                                                              | Sturm, Paul<br>Executive Director/ Restoration Ecologist<br>Ridge to Reefs<br>United States of America (the)                                                                                    |
| Stutz, Rebecca<br>Postdoctoral Fellow<br>Stockholm University<br>Sweden                                                                               | Stvens, Martin<br>Associate Professor, Ecology and Evolution<br>Miami University<br>United States of America (the)                                      | Su, Xiaolei<br>Associate professor<br>Southwest University<br>China                                                                                                                             |
| Suarez, Alvin<br>Marine Reserve Project Manager<br>Comunidad y Biodiversidad, A.C.<br>Mexico                                                          | Suarez, Juana<br>Biology and socioenvironmental magister<br>FLACSO<br>Ecuador                                                                           | Suárez, Marta<br>PhD Student, Ecologist<br>University of the Basque Contry<br>Spain                                                                                                             |

|                                                                                                                                                      |                                                                                                                                                      |                                                                                                                                                                     |
|------------------------------------------------------------------------------------------------------------------------------------------------------|------------------------------------------------------------------------------------------------------------------------------------------------------|---------------------------------------------------------------------------------------------------------------------------------------------------------------------|
| Suárez Alonso, María Luisa<br>CU Ecology<br>University of Murcia<br>Spain                                                                            | Suárez de Tangil, Bruno<br>PhD Student<br>Estación Biológica de Doñana - CSIC<br>Spain                                                               | Suárez Muñoz, María<br>Technical Assistant<br>University of Granada<br>Spain                                                                                        |
| Suarez Ulloa, Victoria<br>Postdoctoral researcher<br>University of Namur<br>Belgium                                                                  | Suarez-Esteban, Alberto<br>University of Alberta<br>Canada                                                                                           | Suárez-Morales, Eduardo<br>Senior Researcher<br>El Colegio de la Frontera Sur (ECOSUR)<br>Mexico                                                                    |
| Suaria, Giuseppe<br>Marine Ecologist<br>CNR-ISMAR<br>Italy                                                                                           | Subhedar, Nishikant *<br>Visiting Faculty<br>Indian Institute of Science Education and Research<br>India                                             | Suchley, Adam<br>Ecologist<br>UNAM<br>Mexico                                                                                                                        |
| Suckow, Axel<br>Senior Research Scientist<br>CSIRO<br>Australia                                                                                      | Sucre, Bibiana<br>Biologist<br>Venezuela (Bolivarian Republic of)                                                                                    | Sudarsono, Sudarsono<br>Molecular biologist<br>Bogor Agricultural University<br>Indonesia                                                                           |
| Sueiro, Leticia *<br>coordinator and professor of the Biological Sciences<br>course.<br>Guarulhos University, SP<br>Brazil                           | Suesatpanit, Tanakorn<br>Industrial Ecology Graduate<br>Thailand                                                                                     | Sueur, Cédric<br>Associate Professor in Animal Behaviour<br>Université de Strasbourg<br>France                                                                      |
| Suis, Mohd. Aminur Faiz<br>Research Officer (Ecology)<br>Forest Research Centre, Sabah Forestry Department<br>Malaysia                               | Sukri, Rahayu<br>Senior Assistant Professor, Plant Ecology<br>Universiti Brunei Darussalam<br>Brunei Darussalam                                      | Sullivan, Camrin<br>Public Library Director<br>United States of America (the)                                                                                       |
| Sullivan, Pamela<br>Conservation Biologist<br>Colorado State University<br>United States of America (the)                                            | Sultana, Aisha<br>Wildlife Scientist<br>University of Delhi<br>India                                                                                 | Sultana, Marufa<br>Doctoral Student<br>Wildlife Ecology and Management, University of Freiburg,<br>Germany<br>Bangladesh                                            |
| Šūmane, Sandra<br>Sociologist<br>Baltic Studies Centre<br>Latvia                                                                                     | Sumida, Paulo<br>Associate Professor of Biological Oceanography<br>University of São Paulo<br>Brazil                                                 | Summerell, Brett *<br>Director Science and Conservation<br>Royal Botanic Gardens Sydney<br>Australia                                                                |
| Summers, Ron<br>Conservation scientist<br>Royal Society for the Protection of Birds<br>United Kingdom of Great Britain and Northern Ireland<br>(the) | Summerscales, John<br>Professor of Composites Engineering<br>University of Plymouth<br>United Kingdom of Great Britain and Northern Ireland<br>(the) | Sumner-Rooney, Lauren<br>Museum Research Fellow, evolutionary neurobiology<br>University of Oxford<br>United Kingdom of Great Britain and Northern Ireland<br>(the) |

|                                                                                                                               |                                                                                                                                                                                               |                                                                                                                                                     |
|-------------------------------------------------------------------------------------------------------------------------------|-----------------------------------------------------------------------------------------------------------------------------------------------------------------------------------------------|-----------------------------------------------------------------------------------------------------------------------------------------------------|
| Sun, I Fang<br>Professor<br>Department of Natural Resources and Environmental Studies, National Dong Hwa University<br>Taiwan | Sun, Jin<br>China                                                                                                                                                                             | Sun, Yong *<br>post-doc<br>Laboratoire des Sciences du Climat et de l'Environnement<br>France                                                       |
| Sunday, Jennifer<br>Post Doctoral Fellow in Ecology<br>University of Washington<br>Canada                                     | Sundberg, Sebastian<br>Associate professor, senior advisor on vascular plants<br>Swedish Species Information Centre [ArtDatabanken],<br>Swedish University of Agricultural Sciences<br>Sweden | Sundh, Henrik<br>Postdoctoral fellow<br>University of Gothenburg<br>Sweden                                                                          |
| Suquet, Marc<br>Researcher<br>France                                                                                          | Suriel, Carlos<br>Biólogo. Encargado Departamento Investigación y Conservación<br>Museo Nacional de Historia Natural "Prof. Eugenio de Jesús Marcano"<br>Dominican Republic (the)             | Surita, Fernanda<br>Associate Professor, Department of Obsterics and Gynecology<br>University of Campinas - UNICAMP<br>Brazil                       |
| Susi, Toma<br>Postdoctoral scientist<br>University of Vienna<br>Austria                                                       | Susman, Millard<br>Professor Emeritus of Genetics<br>University of Wisconsin - Madison<br>United States of America (the)                                                                      | Sussarellu, Rossana<br>researcher<br>IFREMER<br>France                                                                                              |
| Sutcliffe, Laura<br>Post Doc, Plant Ecology<br>Georg-August University of Göttingen<br>Germany                                | Sutherland, Michael<br>Physicist<br>Cambridge University<br>United Kingdom of Great Britain and Northern Ireland (the)                                                                        | Sutter, Christine<br>Ecologist<br>Sutter<br>United States of America (the)                                                                          |
| Sutton, Claudia<br>Molecular Biologist<br>Cornell University (retired)<br>United States of America (the)                      | Sutton, Paul<br>Professor of Geography and the Environment<br>University of Denver<br>United States of America (the)                                                                          | Suzuki, Katia<br>Brazil                                                                                                                             |
| Suzuki, Marina<br>Researcher<br>State university in northern Rio de Janeiro<br>Brazil                                         | Svadlenak-Gomez, Karin<br>Biodiversity conservation and management<br>University of Veterinary Medicine, Vienna<br>Austria                                                                    | Svare, Anne<br>Cand mag. Marine Microbiology, univ. Bergen, Norway<br>Working idealistic to change the bad human influence on earth life.<br>Sweden |

|                                                                                                                                             |                                                                                                                                                                                                                    |                                                                                                                                                 |
|---------------------------------------------------------------------------------------------------------------------------------------------|--------------------------------------------------------------------------------------------------------------------------------------------------------------------------------------------------------------------|-------------------------------------------------------------------------------------------------------------------------------------------------|
| Svavarsson, Jörundur<br>Professor<br>Faculty of Life and Environmental Sciences, University of Iceland<br>Iceland                           | Svenning, Jens-Christian<br>Professor and VILLUM Investigator<br>Section for Ecoinformatics & Biodiversity, Department of Bioscience, Aarhus University<br>Denmark                                                 | Svensson, J. Robin<br>Researcher, Marine ecology<br>Gothenburg university<br>Sweden                                                             |
| Svistoonoff, Sergio<br>Researcher<br>French Research Institute for Development<br>France                                                    | Svoboda, Harlan<br>Ph.D. Candidate<br>Ohio University<br>United States of America (the)                                                                                                                            | Svoboda, Miroslav<br>Scientist/Forest Ecology and management<br>Czech University of Life Sciences<br>Czech Republic (the)                       |
| Swaddell, Lauren<br>Graduate Research Assistant<br>University of Guam<br>Guam                                                               | Swaegers, Janne *<br>Biology<br>Freie Universität Berlin<br>Germany                                                                                                                                                | Swain, Roger<br>Biologist<br>Writer<br>United States of America (the)                                                                           |
| Swaisgood, Ron<br>Director, Recovery Ecology<br>Institute for Conservation Research, San Diego Zoo Global<br>United States of America (the) | Swamy, Latha<br>Senior Advisor in Planetary Health to the Chair of the Rockefeller Foundation Economic Council in Planetary Health<br>Yale Center for the Study of Globalization<br>United States of America (the) | Swan, Kelly<br>Conservation Biologist<br>Canada                                                                                                 |
| Swanson, Diana<br>medicine<br>United States of America (the)                                                                                | Swanson, John<br>Social Sciences - Psychology<br>Retired<br>United States of America (the)                                                                                                                         | Swanson, Patrick<br>Professor, Medical Microbiology and Immunology<br>Creighton University<br>United States of America (the)                    |
| Swart, Carin<br>PhD Student - Biodiversity Conservation<br>Rhodes University<br>South Africa                                                | Swart, Chris<br>retired State Researcher and Evaluator, Social Psychology, Statistician<br>Retired<br>United States of America (the)                                                                               | Swart, Elmer<br>PhD student Ecotoxicology<br>Centre for Ecology and Hydrology, UK<br>United Kingdom of Great Britain and Northern Ireland (the) |
| Swartz, Steven<br>Senior Scientist - Cetology<br>Retired<br>United States of America (the)                                                  | Sweeney, Oisín<br>Senior Ecologist<br>National Parks Association of NSW<br>Australia                                                                                                                               | Sweet, Michael<br>Associate professor<br>University of Derby<br>United Kingdom of Great Britain and Northern Ireland (the)                      |
| Swierk, Lindsey<br>Behavioral Ecology<br>Yale University<br>United States of America (the)                                                  | Swierkosz, Krzysztof<br>PhD, Associate Professor, Vegetation Ecology<br>Wrocław University, Museum of Natural History<br>Poland                                                                                    | Swift, Joel<br>PhD Student   Ecology, Evolution and Systematics<br>St. Louis University<br>United States of America (the)                       |
| Swing, Kelly<br>Founding Director, Tiputini Biodiversity Station<br>Universidad San Francisco de Quito<br>United States of America (the)    | Swinnen, Kristijn<br>Researcher Biologist<br>Natuurpunt Studie<br>Belgium                                                                                                                                          | Sydenstricker, Iara<br>Professor<br>Universidade Federal do Recôncavo da Bahia<br>Brazil                                                        |

\* indicates individual also signed 1992 Scientists' Warning to Humanity



|                                                                                                                         |                                                                                                                                                  |                                                                                                                                               |
|-------------------------------------------------------------------------------------------------------------------------|--------------------------------------------------------------------------------------------------------------------------------------------------|-----------------------------------------------------------------------------------------------------------------------------------------------|
| Sylvester, Janelle<br>Tropical Ecology & Forest Restoration<br>United States of America (the)                           | Syphard, Alexandra<br>Senior Research Scientist<br>Conservation Biology Institute<br>United States of America (the)                              | Szabo, Judit<br>PhD ecologist/conservation biologist<br>Australia                                                                             |
| Szabo, Kristin<br>Administrator/Biologist<br>Nevada Natural Heritage Program<br>United States of America (the)          | Szabó, Stefan<br>Environmental education<br>SOSNA association<br>Slovakia                                                                        | Szasz, Andrew<br>Professor, Environmental Studies<br>University of California, Santa Cruz<br>United States of America (the)                   |
| Szczepaniak, Sylwia<br>molecular biology<br>University of Warsaw<br>Poland                                              | Szentiks, Claudia A.<br>Veterinary Pathologist<br>Leibniz Institute for Zoo- and Wildlife Research (IZW)<br>Germany                              | Szesciorka, Angela<br>Marine Scientist / Ph.D. Student<br>Scripps Institution of Oceanography<br>United States of America (the)               |
| Sziklay, Jamie<br>Postdoctoral researcher/Biology<br>Stanford University<br>United States of America (the)              | Szmant, Alina *<br>Retired and Adjunct Professor of Marine Biology<br>University of North Carolina Wilmington<br>United States of America (the)  | Szrajer, Marcos<br>Sustainability Specialist<br>Stop Hunger Institute Brazil<br>Brazil                                                        |
| Tabarelli, Marcelo<br>Associate Professor<br>Universidade Federal de Pernambuco<br>Brazil                               | Tabares, Ximena<br>Biologist<br>Alfred Wegener Institute<br>Germany                                                                              | Tabata, Ryan<br>Research Specialist<br>University of Hawaii at Manoa<br>United States of America (the)                                        |
| Tabima, Javier<br>Plant Pathology<br>Oregon State University<br>United States of America (the)                          | Tablado, Zulima<br>Post-doctoral position<br>Swiss ornithological society<br>Switzerland                                                         | Taboada, Sergi<br>Postdoctoral Researcher<br>Natural History Museum (London)<br>United Kingdom of Great Britain and Northern Ireland<br>(the) |
| Taboada-Serrano, Patricia<br>Assistant Professor<br>Rochester Institute of Technology<br>United States of America (the) | Tabor, Gary<br>Executive Director<br>Center for Large Landscape Conservation<br>United States of America (the)                                   | Taborda, Rui<br>Geology<br>Universidade de Lisboa<br>Portugal                                                                                 |
| Taborsky, Barbara<br>University of Bern<br>Switzerland                                                                  | Taborsky, Michael<br>Professor of Zoology, Chair in Behavioural Ecology<br>University of Bern, Institute of Ecology and Evolution<br>Switzerland | Tadey, Mariana<br>Researcher/Ecology-restoration<br>CONICET<br>Argentina                                                                      |
| Tadic, Dorde<br>Environmental researcher<br>CSIC<br>Spain                                                               | Taft, Jody M.<br>Herpetologist<br>University of the Western Cape<br>South Africa                                                                 | Taggart, David<br>Conservation Research Fellow<br>University of Adelaide<br>Australia                                                         |

|                                                                                                                                                  |                                                                                                                                                 |                                                                                                                                                       |
|--------------------------------------------------------------------------------------------------------------------------------------------------|-------------------------------------------------------------------------------------------------------------------------------------------------|-------------------------------------------------------------------------------------------------------------------------------------------------------|
| Taggart, Mark<br>Senior Research Fellow<br>University of the Highlands and Islands<br>United Kingdom of Great Britain and Northern Ireland (the) | Taggart, Patrick<br>PhD student<br>University of Adelaide<br>Australia                                                                          | Taha, Elzubeir<br>Physiological Psychologist and President of Sudanese Psychological Society<br>Rector Napata College , Khartoum Sudan<br>Sudan (the) |
| Taiti, Stefano<br>Senior Researcher<br>Institute of Ecosystem Study, CNR<br>Italy                                                                | Takkis, Krista<br>Researcher, plant ecology<br>Estonian University of Life Sciences<br>Estonia                                                  | Takolander, Antti<br>Doctoral Student, Ecology<br>University of Helsinki<br>Finland                                                                   |
| Takriti, Mounir<br>PhD student in environmental science<br>Lancaster University<br>United Kingdom of Great Britain and Northern Ireland (the)    | Tal, Ran<br>Israel National Parks Authority<br>The School of Marine Science, Ruppin Academic Center,<br>Israel<br>Israel                        | Talamás-Rohana, Patricia<br>Professor<br>Centro de Investigación y de Estudios Avanzados del Instituto Politécnico Nacional<br>Mexico                 |
| Talbi, Roy<br>PhD student<br>Haifa University<br>Israel                                                                                          | TALEBI, MAURICIO *<br>Associate Professor<br>Universidade Federal de Sao Paulo, Campus Diadema<br>Brazil                                        | Tallam, Krti<br>Student<br>UIUC<br>United States of America (the)                                                                                     |
| Talleg, Kevin<br>PhD Position<br>Ifremer<br>France                                                                                               | Talley, Nicholas<br>Laureate Professor and Pro Vice-Chancellor<br>University of Newcastle<br>Australia                                          | Talman, Arthur<br>Microbiologist<br>Wellcome Trust Sanger Institute<br>United Kingdom of Great Britain and Northern Ireland (the)                     |
| Talone, Marco<br>Remote Sensing<br>Joint Research Centre, European Commission<br>Italy                                                           | Tamario, Carl<br>B.Sc. Biology<br>Swedish University of Agricultural Science<br>Sweden                                                          | Tambling, Craig<br>Senior Lecturer / Large Mammal Ecology<br>University of Fort Hare<br>South Africa                                                  |
| Tamme, Riin<br>Postdoctoral researcher, plant ecology<br>University of Tartu<br>Estonia                                                          | Tamminga, Ken<br>Distinguished Professor of Landscape Architecture<br>Penn State University<br>United States of America (the)                   | Tampal, Farida<br>State Director/ Wildlife<br>WWF-India<br>India                                                                                      |
| Tan, David<br>Ornithologist<br>National University of Singapore<br>Singapore                                                                     | Tan, G. Y. Annie<br>Microbiology<br>University of Malaya<br>Malaysia                                                                            | Tan, Hanrong<br>PhD Student<br>Queen Mary University of London<br>United Kingdom of Great Britain and Northern Ireland (the)                          |
| Tan, Laura<br>PhD Candidate<br>Australia                                                                                                         | Tanalgo, Krizler<br>Graduate student, ecology and conservation<br>Xishuangbanna Tropical Botanical Garden, Chinese Academy of Sciences<br>China | TANDON, VINAY<br>FORESTER<br>INDIAN FOREST SERVICE<br>India                                                                                           |

|                                                                                                                                                   |                                                                                                                                                     |                                                                                                                                                                      |
|---------------------------------------------------------------------------------------------------------------------------------------------------|-----------------------------------------------------------------------------------------------------------------------------------------------------|----------------------------------------------------------------------------------------------------------------------------------------------------------------------|
| Tanferna, Alessandro<br>PhD Biology<br>Estacion Biologica Doñana CSIC<br>Spain                                                                    | Tang, Kam<br>Professor (Biosciences)<br>Swansea University<br>United Kingdom of Great Britain and Northern Ireland<br>(the)                         | Tang, Sen-Lin *<br>Research Fellow/Professor<br>Biodiversity Research Center, Academia Sinica<br>Taiwan                                                              |
| Tangora, Martin<br>Mathematics<br>University of Illinois at Chicago<br>United States of America (the)                                             | Tanis, Sara<br>Forest Entomology<br>Colgate University<br>United States of America (the)                                                            | Tant, Cynthia<br>Assistant Professor - Ecology<br>Winthrop University<br>United States of America (the)                                                              |
| Taphorn, Donald<br>Research Associate - Ichthyology<br>Royal Ontario Museum<br>United States of America (the)                                     | Tapia Armijos, María Fernanda<br>Coordinator of Ecology and Systematic Section<br>Universidad Técnica Particular de Loja<br>Ecuador                 | Tapley, David<br>Professor of Biology<br>Salem State University<br>United States of America (the)                                                                    |
| Tardif, Stacie<br>PhD student<br>University of Copenhagen<br>Denmark                                                                              | Tardin, Rodrigo<br>Post doctoral fellow<br>Universidade do Estado do Rio de Janeiro<br>Brazil                                                       | Tardy, Emmanuel<br>Marine biology<br>Museum d'Histoire Naturelle de Genève (MHNG)<br>Switzerland                                                                     |
| Tarnawski, Dariusz<br>Prof. dr. zoology<br>Institute of Environmental Biology, Faculty of Biological<br>Sciences, University of Wroclaw<br>Poland | Tarroux, Arnaud<br>Researcher in Animal Ecology<br>Norwegian Institute for Nature Reserach<br>Norway                                                | Tarszisz, Esther<br>Wildlife biologist and veterinarian<br>Sims<br>Australia                                                                                         |
| Tartu, Sabrina<br>Postdoctoral researcher<br>Norway                                                                                               | Tarvainen, Lasse<br>Researcher in Plant Ecophysiology<br>Department of Biological and Environmental Sciences,<br>University of Gothenburg<br>Sweden | Tatarnic, Nikolai<br>Curator of Entomology<br>Western Australian Museum<br>Australia                                                                                 |
| Tatayah, Vikash<br>Conservation Director<br>Mauritian Wildlife Foundation<br>Mauritius                                                            | Tatin, Laurent<br>wildlife ecologist in protected area<br>Conservatoire espaces naturels<br>France                                                  | Tattersall, Erin<br>MSc student, wildlife ecology<br>University of British Columbia<br>Canada                                                                        |
| Tattini, Jacopo<br>PhD Student<br>Technical University of Denmark<br>Italy                                                                        | Taucher, Jan<br>Scientist (Marine Biology)<br>GEOMAR<br>Germany                                                                                     | Taupin, Jean Denis<br>Senior Researcher- Geochemistry and Isotope in water<br>cycle<br>Institut de Recherche pour le Développement/Univ. de<br>Montpellier<br>France |

|                                                                                                                                                      |                                                                                                                                     |                                                                                                                                                              |
|------------------------------------------------------------------------------------------------------------------------------------------------------|-------------------------------------------------------------------------------------------------------------------------------------|--------------------------------------------------------------------------------------------------------------------------------------------------------------|
| Tavares, Reinaldo<br>Professor of Archaeology and History<br>Prol Estudos Institution - The Institute of knowledg<br>democratization<br>Brazil       | Tavares, Valeria<br>Professor<br>UFMG<br>Brazil                                                                                     | Tavecchia, Giacomo<br>Tenured Researcher<br>Consejo Superior Investigaciones Cientificas<br>Spain                                                            |
| Taveggia, Carla<br>Italy                                                                                                                             | Tavera, Rosaluz<br>Professor / Ecology of freshwater algae<br>Universidad Nacional Autónoma de México<br>Mexico                     | Taviani, Marco<br>Senior Researcher, Marine Sciences<br>ISMAR-CNR, Italian National Research Council<br>Italy                                                |
| Tavoloni Gentili, Patricia<br>Professor of Ecology and enviroment<br>Universidade Anhembi Morumbi<br>Brazil                                          | Tawde, Amanda<br>Australia                                                                                                          | Tayleur, Cath<br>Senior Conservation Scientist<br>Royal Society for the Protection of Birds<br>United Kingdom of Great Britain and Northern Ireland<br>(the) |
| Taylor, Amanda<br>Postdoctoral researcher<br>Georg-August-University of Göttingen<br>Germany                                                         | Taylor, Anne<br>Assistant Professor Senior Research<br>Oregon State University<br>United States of America (the)                    | Taylor, Barry<br>Dean, Dunedin School of Medicine<br>University of Otago<br>New Zealand                                                                      |
| Taylor, Benjamin<br>Remote Sensing Scientist<br>Plymouth Marine Laboratory<br>United Kingdom of Great Britain and Northern Ireland<br>(the)          | Taylor, Christopher<br>Professor of Biology<br>University of Texas Rio Grande Valley<br>United States of America (the)              | Taylor, Gavin<br>Postdoctor in Biology<br>Lund University<br>Sweden                                                                                          |
| Taylor, Jeanne<br>Dr in Geology<br>Stellenbosch University<br>South Africa                                                                           | Taylor, Laurence<br>Professor of Mathematics<br>University of Notre Dame<br>United States of America (the)                          | Taylor, Martin<br>Adjunct Lecturer, School of Environmental and Earth<br>Sciences<br>University of Queensland<br>Australia                                   |
| Taylor, Martin<br>Project manager<br>BirdLife South Africa<br>South Africa                                                                           | Taylor, Mary<br>Adjunct Professor, Agrobiodiversity and Climate Change<br>University of the Sunshine Coast, Queensland<br>Australia | Taylor, Nigel<br>Postdoctoral Researcher<br>Tour du Valat, Research Institute for the Conservation of<br>Mediterranean Wetlands<br>France                    |
| Taylor, Robert<br>Geographer<br>United States (U. S.) National Park Service and U. S. Fish<br>and Wildlife Service<br>United States of America (the) | Taylor, Subhashni<br>Lecturer in Science Education<br>University of New England<br>Australia                                        | Tchalondawa, Kisekelwa<br>Assistant Lecturer<br>University of ISP Bukavu<br>Congo (the Democratic Republic of the)                                           |

|                                                                                                           |                                                                                                                                                                                                |                                                                                                                                    |
|-----------------------------------------------------------------------------------------------------------|------------------------------------------------------------------------------------------------------------------------------------------------------------------------------------------------|------------------------------------------------------------------------------------------------------------------------------------|
| Tchamba, José<br>Research<br>ISCED-HUILA<br>Angola                                                        | Tchouankoue, Jean Pierre<br>University lecturer<br>University of Yaounde I<br>Cameroon                                                                                                         | te Beest, Mariska<br>Assistant Professor<br>Copernicus Institute, Utrecht University<br>Netherlands (the)                          |
| Teck, Sarah<br>Marine Science<br>Universidad Autónoma de Baja California<br>Mexico                        | Tecot, Stacey<br>Associate Professor<br>United States of America (the)                                                                                                                         | Tedeschi, Jamie<br>Postdoctoral Research Officer / Conservation Genetics<br>Murdoch University<br>Australia                        |
| Tehan, Richard<br>Graduate Student<br>Oregon State University<br>United States of America (the)           | Teitelbaum, Claire<br>PhD Student, Ecology<br>University of Georgia<br>United States of America (the)                                                                                          | Teixeira, Clarissa<br>PhD Student<br>Universidade Federal de Santa Catarina (UFSC)<br>Brazil                                       |
| Teixeira, Daniel<br>Assistant Professor<br>Universidade de Marília - Unimar<br>Brazil                     | Teixeira, Leonardo H.<br>PhD in Ecology<br>Technical University of Munich<br>Germany                                                                                                           | Teixeira, Renato<br>Professor of Invertebrate Zoology<br>Pontifícia Universidade Católica do Rio Grande do Sul<br>Brazil           |
| Teixeira, Simone<br>professor<br>USP<br>Brazil                                                            | Teixeira, Tulio<br>Professor; Origem da vida e evolução orgânica; Zoologia dos Cordados (amniotas).<br>Escola Superior em Meio Ambiente / Fundação Educacional Vale do São Francisco<br>Brazil | Teixeira Borges Junior, Vitor Nelson<br>Post-Doctoral Fellow/Ecology<br>Universidade Federal do Rio de Janeiro<br>Brazil           |
| Teixeira Duarte, Gabriela<br>PhD candidate<br>Federal University of Minas Gerais<br>Brazil                | Teixidor-Toneu, Irene<br>Early Stage Researcher, Ethnobotany<br>University of Reading<br>United Kingdom of Great Britain and Northern Ireland (the)                                            | Tejada Martinez, Daniela<br>Ph.D student in Science with mention in ecology and evolution<br>Universidad Austral de Chile<br>Chile |
| Tejo, Camila<br>PhD Forest Ecology<br>Universidad Austral de Chile<br>Chile                               | Tekman, Mine B.<br>Alfred Wegener Institute Helmholtz Centre for Polar and Marine Research<br>Germany                                                                                          | Telenius, Anders<br>Associate Professor<br>Swedish Museum of Natural History/GBIF-Sweden<br>Sweden                                 |
| Teli, Maurizio<br>Assistant Professor<br>Madeira Interactive Technologies Institute<br>Portugal           | Telles, Edward<br>Professor of Sociology<br>University of California, Santa Barbara<br>United States of America (the)                                                                          | Telles, Francismeire<br>Postdoctoral Researcher<br>Universidade Federal de Uberlândia<br>Brazil                                    |
| Tello, Jose<br>Associate Professor of Biology<br>Long Island University<br>United States of America (the) | Telnov, Dmitry<br>PhD<br>The Entomological Society of Latvia<br>Latvia                                                                                                                         | temmesfeld, felix<br>M.Sc. Marine Geosciences<br>University Bremen, NIOZ Netherlands<br>Germany                                    |

|                                                                                                                                                         |                                                                                                                 |                                                                                                               |
|---------------------------------------------------------------------------------------------------------------------------------------------------------|-----------------------------------------------------------------------------------------------------------------|---------------------------------------------------------------------------------------------------------------|
| Tempel, Gina<br>Associate Professor/Geological Sciences<br>University of Nevada, Reno<br>United States of America (the)                                 | Templado, Jose *<br>Scientific Researcher<br>National Museum of Natural History (CSIC)<br>Spain                 | ten Den, Paul<br>Freelance Biologist<br>Netherlands (the)                                                     |
| ten Hooven, Freddy<br>Research technician<br>NIOO-KNAW<br>Netherlands (the)                                                                             | ten Hove, Harry<br>associate marine biologist<br>Naturalis<br>Netherlands (the)                                 | Tena, Elena<br>PhD Student<br>Complutense University<br>Spain                                                 |
| Tenan, Simone<br>Population ecologist<br>MUSE - Museo delle Scienze di Trento<br>Italy                                                                  | Tenchov, Boris<br>Professor in Biophysics<br>Medical University-Sofia<br>Bulgaria                               | Teng, Jin<br>Hydrology<br>Australia                                                                           |
| Tennesen, Michael<br>Author: The Next Species; The Future of Evolution in the<br>Aftermath of Man<br>Simon & Schuster<br>United States of America (the) | Tenow, Olle<br>Professor emeritus<br>Dept. of Ecology, Swedish University of Agricultural<br>Sciences<br>Sweden | Tenpas, Sadie<br>Biology Student<br>Lawrence University<br>United States of America (the)                     |
| Tensen, Laura<br>Post Doc Zoology<br>University of Johannesburg<br>South Africa                                                                         | Tentelier, Cédric<br>Assistant professor<br>Univ. Pau & Pays Adour<br>France                                    | Tentscher, Peter<br>Postdoctoral Scientist Chemistry<br>EAWAG<br>Switzerland                                  |
| Teodosiu, Marius<br>Researcher<br>"Marin Drăcea" National Research-Development Institute<br>in Forestry, Câmpulung Moldovenesc Station<br>Romania       | ter Steege, Hans<br>Group Leader Biodiversity Dynamics<br>Naturalis Biodiversity Center<br>Netherlands (the)    | Terborgh, John *<br>Professor Emeritus, tropical ecology<br>Duke University<br>United States of America (the) |
| Teresa, Alfarè<br>Technolo<br>National Research Council - Institute of Marine Sciences<br>Italy                                                         | Terleph, Thomas<br>Biologist<br>Sacred Heart University<br>United States of America (the)                       | Terlevich, Roberto<br>Senior Researcher<br>Instituto Nacional de Astrofisica, Optica y Electronica<br>Mexico  |
| Terraube, Julien<br>Postdoctoral Researcher<br>University of Helsinki<br>Finland                                                                        | Terres, Jean-Michel<br>Scientist / agri-environment<br>France                                                   | Terriente Palacios, Carlos *<br>Research Technician<br>IRTA<br>Spain                                          |
| TERRIER, Marie-Eve *<br>chef de service<br>Direction Départementale de la Protection des<br>Populations<br>France                                       | Terry, Ron<br>Environmental Impact Assessment<br>Geometrician Associates<br>United States of America (the)      | Terschuren, Jean<br>ScientificCollaborator<br>Royal Belgian Institute of Natural Scientists<br>Belgium        |

|                                                                                                                                                         |                                                                                                                                                                                  |                                                                                                                                                     |
|---------------------------------------------------------------------------------------------------------------------------------------------------------|----------------------------------------------------------------------------------------------------------------------------------------------------------------------------------|-----------------------------------------------------------------------------------------------------------------------------------------------------|
| <p>Teruel, Santiago<br/>Entomology<br/>Museu Valencia D'Historia Natural<br/>Spain</p>                                                                  | <p>Terzić, Sreten<br/>Senior research associate/plant breeding<br/>Institute of field and vegetable crops<br/>Serbia</p>                                                         | <p>Tesfaye, Gashaw<br/>Aquatic ecologist<br/>EIAR-National Fishery and Aquatic Life Research Center<br/>Germany</p>                                 |
| <p>Tessarolo, Geiziane<br/>Postdoc<br/>Universidade Estadual de Goiás<br/>Brazil</p>                                                                    | <p>Tessema, Getaneh Addis<br/>Predoctoral program, Geotourism<br/>KU Leuven<br/>Belgium</p>                                                                                      | <p>Testart, Jacques<br/>biologist in human reproduction, director of research<br/>retired from National Institute of Health (Inserm)<br/>France</p> |
| <p>Tettamanti, Gianluca<br/>Associate Professor of Zoology<br/>University of Insubria - Department of Biotechnology and<br/>Life Sciences<br/>Italy</p> | <p>Teunissen, Niki<br/>PhD Candidate - Ecology<br/>Monash University<br/>Australia</p>                                                                                           | <p>Teunissen van Manen, Milan<br/>PhD candidate<br/>University of Amsterdam<br/>Netherlands (the)</p>                                               |
| <p>Tezanos-Pinto, Gabriela<br/>Lecturer<br/>Massey University<br/>New Zealand</p>                                                                       | <p>Thadhani, Vinitha<br/>Senior Research Scientist; Chemistry<br/>Sri Lankan Institute of Nanotechnology<br/>Sri Lanka</p>                                                       | <p>Thaler, Andrew<br/>CEO<br/>Blackbeard Biologic: Science and Environmental Advisors<br/>United States of America (the)</p>                        |
| <p>Thalmayer, Isaiah<br/>Restoration Project Manager<br/>Point Blue Conservation Science<br/>United States of America (the)</p>                         | <p>Thaman, Randolph<br/>Emeritus Professor of Pacific Islands Biogeography<br/>University of the South Pacific<br/>Fiji</p>                                                      | <p>Thammineni, Pullaiah<br/>Professor of Botany<br/>Sri Krishnadevaraya University<br/>India</p>                                                    |
| <p>Thandar, Ahmed<br/>Emeritus Professor<br/>University of KwaZulu-Natal<br/>South Africa</p>                                                           | <p>Thapa, Lal<br/>Asst. Professor, Plant Ecology, Microbial Interaction,<br/>Climate Change, Alien Invasion<br/>Central Department of Botany, Tribhuvan University<br/>Nepal</p> | <p>Thapa, Saroj<br/>Natural Resource Conservationist<br/>USDA<br/>United States of America (the)</p>                                                |
| <p>Thapa, Shyam Kumar<br/>Conservation Officer / Biodiversity Conservation and<br/>Protected Area Management<br/>Nepal</p>                              | <p>THAUNG, Ret *<br/>Research officer<br/>Fauna and Flora International<br/>Cambodia</p>                                                                                         | <p>Thawley, Christopher<br/>University of Rhode Island<br/>United States of America (the)</p>                                                       |
| <p>Thayer, Jared<br/>Business Owner/ Entrepreneur<br/>United States of America (the)</p>                                                                | <p>Thayer, Margaret<br/>Curator Emeritus/Entomology<br/>Field Museum of Natural History<br/>United States of America (the)</p>                                                   | <p>Thayer morel Encar, Tomas<br/>Encargado de sustentabilidad y energia<br/>UMCE<br/>Chile</p>                                                      |
| <p>Theau, Jerome<br/>Associate professor<br/>Université de Sherbrooke<br/>Canada</p>                                                                    | <p>Thébaud, Christophe<br/>University Professor<br/>University of Toulouse<br/>France</p>                                                                                        | <p>Thébaud, Gaël<br/>Researcher<br/>Thébaud<br/>France</p>                                                                                          |

|                                                                                                                                              |                                                                                                                                                                             |                                                                                                                                                                 |
|----------------------------------------------------------------------------------------------------------------------------------------------|-----------------------------------------------------------------------------------------------------------------------------------------------------------------------------|-----------------------------------------------------------------------------------------------------------------------------------------------------------------|
| Theberge, John<br>Professor of Ecology Retired<br>University of Waterloo<br>Canada                                                           | Theberge, Mary<br>Wildlife Researcher<br>Canada                                                                                                                             | Theobald, Emma<br>Masters by Research student in Ecology<br>University of Exeter<br>United Kingdom of Great Britain and Northern Ireland (the)                  |
| Therese, Steenberghen<br>Professor, geography and spatial planning<br>KU leuven<br>Belgium                                                   | Theron, Genevieve<br>MSc Candidate, Evolutionary Ecology<br>Stellenbosch University<br>South Africa                                                                         | Therry, Lieven<br>Postdoctoral researcher<br>CNRS<br>France                                                                                                     |
| Théry, Hervé<br>Directeur de recherche émérite au CNRS, géographe<br>CNRS<br>France                                                          | Theurillat, Jean-Paul<br>Lecturer<br>University of Geneva<br>Switzerland                                                                                                    | Thevenin, Charles<br>PhD Student<br>Pierre et Marie Curie University<br>France                                                                                  |
| Thévenon, Sophie<br>researcher<br>CIRAD<br>France                                                                                            | THIBAULT, Martin<br>Phd Student, Ecology and Conservation Biology<br>IAC, Massey University<br>New Caledonia                                                                | Thibodeau, Patricia<br>Ph.D. Candidate<br>Virginia Institute of Marine Science<br>United States of America (the)                                                |
| Thiel, Whitney<br>Master's Student. Freshwater & Marine Science<br>University of Wisconsin Madison<br>United States of America (the)         | Thiele, Christina<br>University of Southampton<br>United Kingdom of Great Britain and Northern Ireland (the)                                                                | Thiele, Torsten<br>Visiting Fellow<br>LSE Institute of Global Affairs<br>United Kingdom of Great Britain and Northern Ireland (the)                             |
| Thierry, Guillaume<br>Professor of Cognitive Neuroscience<br>Bangor University<br>United Kingdom of Great Britain and Northern Ireland (the) | Thierry, Virginie<br>Researcher/ Physical oceanography<br>IFREMER, Brest, Laboratory of physical oceanography and remote sensing (LOPS, UMR CNRS/Ifremer/IRD/UBO)<br>France | Thiers, Barbara<br>Patricia K. Holmgren Directo, William & Lynda Steere Herbarium<br>The New York Botanical Garden<br>United States of America (the)            |
| Thiers, Oscar<br>Associate professor<br>Universidad Austral de Chile<br>Chile                                                                | Thiery, Wim<br>Assistant Professor, Climate Science<br>Vrije Universiteit Brussel & ETH Zurich<br>Switzerland                                                               | Thill, Vicki<br>Graduate student/museum curator<br>University of Nevada, Reno<br>United States of America (the)                                                 |
| Thimbleby, Harold<br>Professor<br>Swansea University<br>United Kingdom of Great Britain and Northern Ireland (the)                           | Thinley, Phuntsho<br>Principal Forestry Research Officer, Conservation Biology<br>Ugyen Wangchuck Institute for Conservation and Environment Research<br>Bhutan             | Thirugnanam, Esakkiappan<br>Assistant Professor<br>Manonmaniam Sundaranar University Constituent College, Kadayannallur, Tirunelveli, Tamilnadu, India<br>India |



|                                                                                                                                            |                                                                                                                                                      |                                                                                                                                                  |
|--------------------------------------------------------------------------------------------------------------------------------------------|------------------------------------------------------------------------------------------------------------------------------------------------------|--------------------------------------------------------------------------------------------------------------------------------------------------|
| Thoen, Hanne Halkinrud<br>Postdoctoral research fellow<br>University of Queensland<br>Australia                                            | Thogmartin, Wayne<br>Research Ecologist<br>A Federal Science Bureau<br>United States of America (the)                                                | Thomas, Colette<br>Adjunct Research Fellow<br>The Centre for Tropical Water & Aquatic Ecosystem<br>Research, James Cooko University<br>Australia |
| Thomas, Dana<br>Botanist/Ecologist<br>NatureCITE<br>United States of America (the)                                                         | Thomas, Duncan<br>Instructor<br>Washington State University<br>United States of America (the)                                                        | Thomas, Hannah<br>Ecology student<br>University of Queensland<br>Australia                                                                       |
| Thomas, Justin<br>Phytosociology<br>NatureCITE<br>United States of America (the)                                                           | Thomas, Philip<br>conservation biology/invasive species<br>Pacific Cooperative Studies Unit (University of Hawaii)<br>United States of America (the) | Thomas, Sabina<br>Geology<br>UCSB<br>United States of America (the)                                                                              |
| Thomas, Sean<br>Forestry<br>University of Toronto<br>Canada                                                                                | Thomborson, Clark<br>Professor, Computer Science<br>University of Auckland<br>New Zealand                                                            | THOME, PATRICIA<br>RESEARCH SCIENTIST<br>UNIVERSIDAD NACIONAL AUTONOMA DE MEXICO<br>Mexico                                                       |
| Thomé, Pauline<br>Student of Biology<br>Georg-August-Universität Göttingen<br>Germany                                                      | Thompson, Daniel<br>Biology Laboratory Manager<br>Earlham College<br>United States of America (the)                                                  | Thompson, Daniel<br>Life Sciences<br>University of Nevada Las Vegas<br>United States of America (the)                                            |
| Thompson, Faye<br>Postdoctoral Research Associate<br>University of Exeter<br>United Kingdom of Great Britain and Northern Ireland<br>(the) | Thompson, Fiona<br>PhD Student<br>The University of Plymouth<br>United Kingdom of Great Britain and Northern Ireland<br>(the)                        | Thompson, Jeffrey<br>Ecology<br>Consejo Nacional de Ciencia y Teconolgia (Paraguay)/<br>Sociedad Cientifico de Paraguay<br>Paraguay              |
| Thompson, Kim<br>Educator<br>Ohio University<br>United States of America (the)                                                             | Thompson, Kirsten<br>Postdoctoral researcher<br>University of Exeter<br>United Kingdom of Great Britain and Northern Ireland<br>(the)                | Thompson, Kristin<br>PhD student - Behavioural Ecology<br>University of Exeter<br>United Kingdom of Great Britain and Northern Ireland<br>(the)  |
| Thompson, Lindy<br>Postdoctoral Research Fellow<br>University of KwaZulu-Natal<br>South Africa                                             | Thompson, Michael<br>Professor in Zoology<br>University of Sydney<br>Australia                                                                       | Thompson, Ron<br>Biologist/Researcher<br>Primero Conservation.org<br>United States of America (the)                                              |
| Thompson, Sarah<br>Research Fellow Glaciology<br>Swansea University<br>United Kingdom of Great Britain and Northern Ireland<br>(the)       | Thomsen, Camilla Lerbjerg<br>Biologist<br>Denmark                                                                                                    | Thomson, James<br>Professor<br>University of Toronto<br>Canada                                                                                   |

|                                                                                                                           |                                                                                                                                                                            |                                                                                                                                                                                              |
|---------------------------------------------------------------------------------------------------------------------------|----------------------------------------------------------------------------------------------------------------------------------------------------------------------------|----------------------------------------------------------------------------------------------------------------------------------------------------------------------------------------------|
| Thomson, Victoria<br>Marine ecology<br>Griffith University<br>Australia                                                   | Thomson, W. Murray<br>Professor of Dental Epidemiology and Public Health<br>The University of Otago<br>New Zealand                                                         | Thong, Kwai Lin<br>professor<br>University of Malaya, Kuala Lumpur<br>Malaysia                                                                                                               |
| Thor, Peter<br>Researcher<br>Norwegian Polar Institute<br>Norway                                                          | Thorn, Jessica P. R.<br>Postdoctoral Research Fellow<br>Colorado State University, Department of Ecosystem<br>Science and Sustainability<br>United States of America (the) | Thorne, Trischa<br>Ornithology<br>Thorne<br>United States of America (the)                                                                                                                   |
| Thornley, Reece<br>Masters Student- Conservation Biology<br>United Kingdom of Great Britain and Northern Ireland<br>(the) | Thornton, Alex<br>Senior Lecturer<br>University of Exeter<br>United Kingdom of Great Britain and Northern Ireland<br>(the)                                                 | Thornton, Sara<br>PhD Candidate (Submitted), School of Geography,<br>Geology and the Environment<br>University of Leicester<br>United Kingdom of Great Britain and Northern Ireland<br>(the) |
| Thornton-Dunlap, Whitney<br>Ecologist<br>SFSU<br>United States of America (the)                                           | Thorpe, Andrea<br>Ecologist<br>United States of America (the)                                                                                                              | Thorsteinsdottir, Solveig<br>Assistant Professor / Developmental Biology<br>University of Lisbon<br>Portugal                                                                                 |
| Thorsteinsson, Throstur<br>Professor<br>Environment and Natural Resources, University of Iceland<br>Iceland               | Thorstrom, Russell<br>Director of Madagascar and West Indies<br>Projects/Research Biologist<br>The PeregrineFund<br>United States of America (the)                         | Thouzeau, Alexandre *<br>Environmental consultant<br>France                                                                                                                                  |
| THOUZEAU, GERARD<br>CNRS Research Director<br>Centre National de la Recherche Scientifique<br>France                      | Thow, Caroline<br>PhD Candidate, Ecology and Evolution<br>UC Santa Cruz<br>United States of America (the)                                                                  | Throckmorton, Zachary<br>Assistant Professor, Anatomy<br>Arkansas College of Osteopathic Medicine<br>United States of America (the)                                                          |
| Thuesen, Erik V<br>Member of the Faculty, Zoology<br>Evergreen State College<br>United States of America (the)            | Thuile Bistarelli, Lukas<br>PhD Student/ Ecology<br>Leibniz-Institute of Freshwater Ecology and Inland<br>Fisheries<br>Germany                                             | Thurstan, Ruth<br>Postdoctoral Researcher<br>Deakin University<br>Australia                                                                                                                  |
| Tibbets, Teresa<br>Freshwater Ecologist<br>University of Wyoming<br>United States of America (the)                        | Tibirica, Yara<br>Marine researcher<br>Sealife Research<br>Mozambique                                                                                                      | Tickler, David<br>Marine Ecologist<br>University of Western Australia<br>Australia                                                                                                           |

|                                                                                                                        |                                                                                                                    |                                                                                                                                         |
|------------------------------------------------------------------------------------------------------------------------|--------------------------------------------------------------------------------------------------------------------|-----------------------------------------------------------------------------------------------------------------------------------------|
| Tidke, Jaykiran *                                                                                                      | Tidon, Rosana                                                                                                      | Tiede, Julia                                                                                                                            |
| Professor and Head<br>Department of Botany,Sant Gadge Baba Amravati<br>University,Amravati (MS) 444602<br>India        | Professor / Evolutionary Biology<br>Universidade de Brasília (UnB)<br>Brazil                                       | PhD candidate in Biodiversity and Ecology<br>Institute of Landscape Ecology, University of Münster<br>Germany                           |
| Tiegs, Scott                                                                                                           | Tielbörger, Katja                                                                                                  | Tierney, Niall                                                                                                                          |
| Associate Professor of Biology<br>Oakland University<br>United States of America (the)                                 | Professor for Plant Ecology<br>University of Tübingen<br>Germany                                                   | Conservation Biologist<br>Faculty of Natural Resources and Environmental<br>Sciences, Agricultural University of Iceland<br>Iceland     |
| Tierno de Figueroa, José Manuel                                                                                        | Tietjen, Kristina                                                                                                  | Tietze, Dieter Thomas                                                                                                                   |
| Associate professor<br>Department of Zoology. University of Granada<br>Spain                                           | Graduate Student of Biology<br>University of Victoria<br>Canada                                                    | Academic Assistant (ornithology, biogeography,<br>genomics)<br>IPMB, Heidelberg University<br>Germany                                   |
| Tilbrook, Kevin                                                                                                        | Tilker, Andrew                                                                                                     | Tills, Oliver                                                                                                                           |
| Marine Biologist<br>United Kingdom of Great Britain and Northern Ireland<br>(the)                                      | Scientist<br>Leibniz Institute for Zoo and Wildlife Research / Global<br>Wildlife Conservation<br>Germany          | Teaching and Research Associate, Marine Biology<br>Plymouth University<br>United Kingdom of Great Britain and Northern Ireland<br>(the) |
| Tilstra, Arjen                                                                                                         | Tim, Nele                                                                                                          | Timberlake, Jonathan                                                                                                                    |
| PhD student<br>Bremen University<br>Germany                                                                            | Geoscience<br>University of Hamburg<br>Germany                                                                     | Botanist<br>Royal Botanic Gardens, Kew<br>United Kingdom of Great Britain and Northern Ireland<br>(the)                                 |
| Timm, Robert                                                                                                           | Timmerman, Kirsten                                                                                                 | Tindle, Hayley                                                                                                                          |
| Professor<br>University of Kansas<br>United States of America (the)                                                    | MSc student Evolution, Biodiversity and Conservation<br>Leiden University<br>Netherlands (the)                     | Conservation Psychology<br>University of South Australia<br>Australia                                                                   |
| Tingley, Morgan                                                                                                        | Tironi-Silva, Antonio                                                                                              | Tisselli, Eugenio                                                                                                                       |
| Assistant Professor of Ecology and Evolutionary Biology<br>University of Connecticut<br>United States of America (the) | Chief Scientific Officer<br>Cienciambiental Consultores S.A<br>Chile                                               | Postdoctoral researcher: IT/Agroecology<br>Swiss Federal Institute of Technology Zurich<br>Spain                                        |
| Tissot, Tazio                                                                                                          | Tissot Squalli Houssaini, Mara Lisiane                                                                             | Tisthammer, Kaho                                                                                                                        |
| Université de Montpellier<br>France                                                                                    | Botany and Plant Ecology<br>Universidade Regional do Noroeste do Estado do Rio<br>Grande do Sul - UNIJUI<br>Brazil | Postdoctoral Researcher<br>University of Hawaii at Manoa<br>United States of America (the)                                              |

|                                                                                                                                                                      |                                                                                                                                               |                                                                                                                                                                  |
|----------------------------------------------------------------------------------------------------------------------------------------------------------------------|-----------------------------------------------------------------------------------------------------------------------------------------------|------------------------------------------------------------------------------------------------------------------------------------------------------------------|
| Titman, Rodger<br>Professor of Wildlife Biology<br>McGill University<br>Canada                                                                                       | Titos, Manuel<br>PhD. Machine learning and Signal Processing<br>University of Granada<br>Spain                                                | Titus, Tomson<br>United Kingdom of Great Britain and Northern Ireland<br>(the)                                                                                   |
| Tiunov, Alexei V.<br>Laboratory head / Soil Biology<br>A.N. Severtsov Institute of Ecology and Evolution, Russian<br>Academy of Sciences<br>Russian Federation (the) | Tixier, Antoine<br>Civil Engineering<br>France                                                                                                | Tizei, Pedro<br>PhD student, synthetic biology<br>University College London<br>United Kingdom of Great Britain and Northern Ireland<br>(the)                     |
| Tizon, F. Rodrigo<br>Researcher<br>INTA - Instituto Nacional de Tecnología Agropecuaria<br>Argentina                                                                 | Tjaden, Nils<br>Geoecologist<br>Dpt. of Biogeography, University of Bayreuth<br>Germany                                                       | Tmalla, Ahmed<br>Honorary Research Associate<br>NATURALIS Biodiversity Center, The Netherlands<br>Netherlands (the)                                              |
| Tobar Abarca, Daniela<br>Applied Ecology<br>Argentina                                                                                                                | Tobias, Joseph<br>Senior Lecturer in Biodiversity<br>Imperial College London<br>United Kingdom of Great Britain and Northern Ireland<br>(the) | Tobin, S Carl<br>Assoc. Professor of Environmental Science<br>Alaska Pacific University<br>United States of America (the)                                        |
| TODARO, M. Antonio<br>Professor of Zoology<br>University of Modena and Reggio Emilia - DSV<br>Italy                                                                  | Todd, Colleen<br>Freshwater Ecologist<br>Private Consultant<br>South Africa                                                                   | Todd, Jonathan<br>Senior Curator-in-Charge, Palaeobiology<br>The Natural History Museum, London<br>United Kingdom of Great Britain and Northern Ireland<br>(the) |
| Todd, Mark<br>Meteorologist<br>Meteorological Service of New Zealand Limited<br>New Zealand                                                                          | Todgham, Anne<br>Associate Professor<br>University of California Davis<br>United States of America (the)                                      | Toivonen, Johanna<br>Post Doctoral researcher / Treeline ecology<br>Finland                                                                                      |
| Toivonen, Marjaana<br>Postdoctoral researcher<br>Finnish Environment Institute (SYKE)<br>Finland                                                                     | Toledano Granados, Arturo<br>Tecnico Academico<br>Instituto de Ciencias del mar y Limnologia<br>Mexico                                        | Toledo, José<br>Professor<br>Federal University of Amapá<br>Brazil                                                                                               |
| Toledo, Marisol<br>Directora Ejecutiva<br>Museo de Historia Natural Noel Kempff Mercado -<br>UAGRM<br>Bolivia (Plurinational State of)                               | Toles, Chris<br>Chemist/IP Analyst<br>United States of America (the)                                                                          | Tolhurst, Bryony<br>Senior Lecturer in Ecology<br>University of Brighton<br>United Kingdom of Great Britain and Northern Ireland<br>(the)                        |
| Tolley, Krystal<br>Principal Scientist/Biodiversity<br>South African National Biodiversity Institute<br>South Africa                                                 | Tolusso, Emiliano<br>PhD Candidate in Environmental Geography<br>State University of Milan<br>Italy                                           | Toma, Tiago<br>Postdoctoral fellow / Human Ecology<br>Universidade do Estado da Bahia<br>Brazil                                                                  |

|                                                                                                                                  |                                                                                                                                                                                    |                                                                                                                                       |
|----------------------------------------------------------------------------------------------------------------------------------|------------------------------------------------------------------------------------------------------------------------------------------------------------------------------------|---------------------------------------------------------------------------------------------------------------------------------------|
| Tomalin, Mariana<br>GIS technician<br>South African Association for Marine Biological Research<br>South Africa                   | Tomas, Gustavo<br>"Ramon y Cajal" Researcher, Evolutionary Ecology<br>Estacion Experimental de Zonas Aridas - Consejo Superior de Investigaciones Cientificas (EEZA-CSIC)<br>Spain | Tomás, Jesús<br>Associate Professor<br>University of Valencia<br>Spain                                                                |
| Tomascik, Tomas<br>Canada                                                                                                        | Tomasella, Javier<br>Scientist<br>Cemaden<br>Brazil                                                                                                                                | Tomasetto, Federico<br>Scientist<br>AgResearch Ltd.<br>New Zealand                                                                    |
| Tomatsuri, Morihiko<br>pHd student / Marine ecology<br>Shimoda Marine Research Center, University of Tsukuba<br>Japan            | Tomczak, Matthias<br>Emeritus Professor of Oceanography<br>Flinders University<br>Australia                                                                                        | Tomiolo, Sara<br>Postdoc/Plant Ecology<br>Aarhus University<br>Denmark                                                                |
| Tomita, Takehito<br>Graduate student<br>EMBL<br>Germany                                                                          | Tomkovich, Pavel<br>Head of Ornithology Dept., Zoology<br>Zoological Museum, M.V.Lomonosov Moscow State Univ.<br>Russian Federation (the)                                          | Tomlinson, Bill<br>Professor of Information Management<br>Victoria University of Wellington<br>New Zealand                            |
| Tomlinson, Kyle<br>Professor, Plant Ecology<br>Chinese Academy of Sciences<br>China                                              | Tomotani, Barbara<br>Postdoctoral researcher (Ecology)<br>Brazil                                                                                                                   | Tonello, Marco<br>Researcher in Economics<br>Italy                                                                                    |
| Tong, Dr Lydia J<br>Wildlife Veterinary Pathologist<br>Taronga Conservation Society Australia<br>Australia                       | Toni, Pauline<br>PhD student in Behavioural Ecology<br>University of Sherbrooke<br>Canada                                                                                          | Tonin, Alan<br>PhD student<br>University of Brasilia<br>Brazil                                                                        |
| Toniol, Rodrigo<br>Anthropology<br>Utrecht University<br>Netherlands (the)                                                       | TONNANG, Henri<br>Scientist<br>CIMMYT<br>Kenya                                                                                                                                     | Tonoto, Prayoto<br>Graduate student<br>Hiroshima university<br>Japan                                                                  |
| Tonra, Christopher<br>Assistant Professor/Avian Ecologist<br>United States of America (the)                                      | Tonti-Filippini, Julian<br>Research Fellow (Bioinformatics)<br>The University of Western Australia<br>Australia                                                                    | Tonucci, Bianca Maria<br>Italy                                                                                                        |
| Toomey, Will<br>Trainee Clinical Psychologist<br>Bangor University<br>United Kingdom of Great Britain and Northern Ireland (the) | Toonen, Robert<br>Professor of Marine Biology<br>University of Hawaii at Manoa<br>United States of America (the)                                                                   | Toothman, Byron<br>NC Coastal Reserve Research biologist<br>University of North Carolina Wilmington<br>United States of America (the) |

|                                                                                                                                                                     |                                                                                                                                                                             |                                                                                                                                                                                                     |
|---------------------------------------------------------------------------------------------------------------------------------------------------------------------|-----------------------------------------------------------------------------------------------------------------------------------------------------------------------------|-----------------------------------------------------------------------------------------------------------------------------------------------------------------------------------------------------|
| <p>Topercer, Jano<br/>Senior Research Scientist - Ecologist<br/>Comenius University in Bratislava, Botanical Garden,<br/>Detached Unit at Blatnica<br/>Slovakia</p> | <p>Töpfer, Natalie<br/>Phd student Biophotonics<br/>Center for sepsis control and care, University Hospital Jena<br/>Germany</p>                                            | <p>Torezan, Jose Marcelo<br/>professor, ecology<br/>Londrina State University<br/>Brazil</p>                                                                                                        |
| <p>Torices, Rubén<br/>Marie Skłodowska-Curie Fellow in Evolutionary Ecology<br/>Experimental Station of Arid Zones (EEZA-CSIC)<br/>Spain</p>                        | <p>Tornero, Irene<br/>PhD student<br/>University of Girona<br/>Spain</p>                                                                                                    | <p>Törnroos, Anna<br/>Postdoctoral Scientist<br/>Åbo Akademi University, Environmental and Marine<br/>Biology<br/>Finland</p>                                                                       |
| <p>Török, Zsolt<br/>Scientific Researcher<br/>Danube Delta National Institute for Research and<br/>Development<br/>Romania</p>                                      | <p>Toro-Velasco, Manuel<br/>Head of Department of Aquatic Environment<br/>Center for Hydrographic Studies of CEDEX<br/>Spain</p>                                            | <p>Torpy, Fraser<br/>Director, Plants and Environmental Quality Research<br/>Group<br/>University of Technology Sydney<br/>Australia</p>                                                            |
| <p>Torralba, Mario<br/>PhD Student in Landscape Architecture<br/>University of Copenhagen<br/>Denmark</p>                                                           | <p>Torralba-Burrial, Antonio<br/>Profesor asociado / Didactic of Experimental Sciences<br/>Universidad de Oviedo<br/>Spain</p>                                              | <p>Torrance, Leigh<br/>PhD student<br/>Stellenbosch University<br/>South Africa</p>                                                                                                                 |
| <p>Torrecilla, Elena<br/>Research Officer<br/>Instiute of Marine Sciences (ICM-CSIC)<br/>Spain</p>                                                                  | <p>Torrent, Laura<br/>PhD student<br/>University of Girona<br/>Spain</p>                                                                                                    | <p>Torrente-Vilara, Gislene *<br/>Professor<br/>Universidade Federal de São Paulo<br/>Brazil</p>                                                                                                    |
| <p>Torres, Aurora<br/>Post-Doctoral Researcher<br/>German Centre for Integrative Biodiversity Research<br/>(iDiv) Halle-Jena-Leipzig<br/>Germany</p>                | <p>Torres, Leigh<br/>Assistant Professor<br/>Oregon State University<br/>United States of America (the)</p>                                                                 | <p>Torres, Maria F.<br/>PhD student, MSc. in Biological Sciences<br/>University of Edinburgh, Royal Botanic Garden Edinburgh<br/>United Kingdom of Great Britain and Northern Ireland<br/>(the)</p> |
| <p>Torres, Raul<br/>Electrical Engineering<br/>University of Puerto Rico at Mayaguez<br/>Puerto Rico</p>                                                            | <p>Torres, Rita<br/>Post doctoral researcher<br/>University of aveiro<br/>Portugal</p>                                                                                      | <p>TORRES, TOMÁS<br/>Universidad Autónoma de Madrid<br/>Spain</p>                                                                                                                                   |
| <p>Torres de Almeida, Catherine<br/>environmental scientist<br/>INPE<br/>Brazil</p>                                                                                 | <p>Torres García, Mari Trinidad<br/>PhD Student<br/>Andalusian Centre for the Assessment and Monitoring of<br/>Global Change (CAESCG) - University of Almería<br/>Spain</p> | <p>Torres-Labansat, Manuel<br/>Physics<br/>UNAM<br/>Mexico</p>                                                                                                                                      |

|                                                                                                                        |                                                                                                                       |                                                                                                                                                                  |
|------------------------------------------------------------------------------------------------------------------------|-----------------------------------------------------------------------------------------------------------------------|------------------------------------------------------------------------------------------------------------------------------------------------------------------|
| Torres-Leite, Filipe<br>Master's Degree<br>Universidade Federal do Espírito Santo<br>Brazil                            | Torres-Porras, Jeronimo<br>Professor<br>Universidad de Córdoba<br>Spain                                               | Torrez, Vania<br>Universidad Mayor de San Andres<br>Bolivia (Plurinational State of)                                                                             |
| Torró, Lisard<br>PhD - Associate Professor<br>Universitat Autònoma de Barcelona<br>Spain                               | Torroja, Laura<br>Professor<br>Universidad Autonoma de Madrid<br>Spain                                                | torrontegui, graciela<br>trabajo social<br>sspa<br>Spain                                                                                                         |
| Tortato, Fernando<br>Research Fellow<br>Panthera<br>Brazil                                                             | Tosato, Alberto<br>MS Material Science<br>Augsburg University<br>Germany                                              | Toscano, William<br>Professor Environmental Health Sciences<br>University of Minnesota School of Public Health<br>United States of America (the)                 |
| Tosi, Luigi<br>Senior Researcher, Coastal Systems<br>National Research Council - Institute of Marine Sciences<br>Italy | Tosta Silva, Maria Beatriz<br>Biology Student<br>Brazil                                                               | Tosto, Ambra<br>PhD candidate- Crop Science<br>Wageningen University & Research<br>Italy                                                                         |
| Toth, Caroline<br>Botanist<br>The Great Basin Institute<br>United States of America (the)                              | Tougeron, Kévin<br>PhD<br>Université de Rennes 1<br>France                                                            | Toullec, Jordan<br>PhD candidate in Biogeochemistry<br>IUEM-UBO<br>France                                                                                        |
| Tourenq, Christophe<br>Conservation and Wetland Manager<br>Banrock Station Ramsar Wetland Complex<br>Australia         | Tourtellot, Samuel<br>PhD student<br>Bio-protection Research Centre<br>New Zealand                                    | Tovar, Hugo<br>Bioinformatician<br>National Institute of Genomic Medicine<br>Mexico                                                                              |
| Tovar Durán, Juan David<br>Botanist<br>Universidade Federal do Oeste do Pará<br>Brazil                                 | Tovar-Hernández, Maria Ana<br>Associated Researcher, Invasive species<br>Universidad Autónoma de Nuevo León<br>Mexico | Towers, Bec<br>Senior Conservation Officer / Zoology & Ecology<br>(Marine) Queensland Parks and Wildlife Service / James<br>Cook University, Cairns<br>Australia |
| Towers, Briony<br>Research Fellow, Disaster Risk Management<br>RMIT University<br>Australia                            | Townsend, Colin<br>Emeritus Professor, Ecology<br>University of Otago<br>New Zealand                                  | Townson, Laura<br>QT Supply Technician<br>United Kingdom of Great Britain and Northern Ireland<br>(the)                                                          |
| Traba Díaz, Juan<br>Assistant Professor<br>Department of Ecology. Universidad Autónoma de Madrid<br>Spain              | Traber, Maret<br>Ava Helen Pauling Professor/Nutrition<br>Oregon State University<br>United States of America (the)   | Tracy, Richard<br>Professor<br>University of Nevada Reno<br>United States of America (the)                                                                       |

|                                                                                                                             |                                                                                                                                                                            |                                                                                                                                                             |
|-----------------------------------------------------------------------------------------------------------------------------|----------------------------------------------------------------------------------------------------------------------------------------------------------------------------|-------------------------------------------------------------------------------------------------------------------------------------------------------------|
| Trad, Rafaela Jorge<br>PhD student<br>University of Campinas<br>Brazil                                                      | Trager, Scott<br>Director and Professor<br>Kapteyn Astronomical Institute, University of Groningen<br>Netherlands (the)                                                    | Trainor, Colin<br>Conservation Biologist<br>Charles Darwin University<br>Australia                                                                          |
| Trajce, Aleksander<br>PhD in Anthropology<br>PPNEA<br>Albania                                                               | Tramontano, Melanie<br>Biologist<br>EMBL<br>Germany                                                                                                                        | Tran, Cass<br>University of Queensland<br>Australia                                                                                                         |
| Trancoso, Ralph<br>Research Fellow / Climate Change<br>The University of Queensland<br>Australia                            | Transon, Julie<br>Researcher in geomatics<br>Université catholique de Louvain<br>Belgium                                                                                   | Tranvik, Lars<br>Professor, Limnology<br>Department of Ecology and Genetics, Uppsala University<br>Sweden                                                   |
| Trapnell, Lucy<br>Anthropologist<br>Ministry of Education<br>Peru                                                           | Traut, Bibit<br>Professor<br>City College of San Francisco<br>United States of America (the)                                                                               | Traver, Elizabeth<br>Hydrological Lab Manager and PhD candidate<br>University of Wyoming<br>United States of America (the)                                  |
| Trbojević, Igor<br>PhD - ecologist and zoologist<br>University of Banja Luka, Faculty of Sciences<br>Bosnia and Herzegovina | Trbojević, Tijana<br>MSc student in Enviromental Science<br>Independent University of Banja Luka, Faculty of Ecology<br>Bosnia and Herzegovina                             | Treadwell Kerr, Maree<br>( Masters Wildlife Management, Macquarie Uni) Higher<br>degree candidate School of Environment<br>Griffith University<br>Australia |
| Trebacz, Kazimierz<br>professor/ biology, biophysics<br>Maria Curie-Sklodowska University, Lublin<br>Poland                 | Trefaut rodrigues, Miguel<br>Professor Zoology<br>University of São Paulo<br>Brazil                                                                                        | Trogenza, Thomas<br>Professor of Evolutionary Ecology<br>University of Exeter<br>United Kingdom of Great Britain and Northern Ireland<br>(the)              |
| Trejo, Gabriel *<br>Chemistry<br>Centro de invrstigación en electrowuimica<br>Mexico                                        | Trekels, Hendrik<br>Postdoctoral researcher metacommunity ecology<br>Vrije Universiteit Brussel<br>Belgium                                                                 | Tremblay, Yann<br>researcher / marine behavioral ecology<br>IRD<br>France                                                                                   |
| Treml, Eric<br>Lecturer in Marine Biology<br>University of Melbourne<br>Australia                                           | Trenchard, Liz<br>Research Fellow<br>Centre for Agroecology, Water and Resilience, Coventry<br>University<br>United Kingdom of Great Britain and Northern Ireland<br>(the) | Treseder, Kathleen<br>Professor of Ecology and Evolutionary Biology<br>University of California Irvine<br>United States of America (the)                    |



|                                                                                                                                                  |                                                                                                                                        |                                                                                                                                 |
|--------------------------------------------------------------------------------------------------------------------------------------------------|----------------------------------------------------------------------------------------------------------------------------------------|---------------------------------------------------------------------------------------------------------------------------------|
| tresemer, john<br>Marine ecologist<br>La Cusinga<br>Costa Rica                                                                                   | Tress, Michael<br>Bioinformatician<br>Spanish National Cancer Research Centre (CNIO)<br>Spain                                          | Treurnicht, Martina Fynbos<br>PhD candidate<br>Department of Conservation Ecology, Stellenbosch<br>University<br>South Africa   |
| Trevelline, Brian<br>Postdoctoral Associate<br>University of Pittsburgh<br>United States of America (the)                                        | Treves, Adrian<br>Professor of Environmental Studies<br>University of Wisconsin-Madison<br>United States of America (the)              | Treweek, Joanna<br>Ecologist<br>eCountability<br>United Kingdom of Great Britain and Northern Ireland<br>(the)                  |
| Triana-Moreno, Luz Amparo<br>Assistant Professor / Botanist<br>Universidad de Caldas<br>Colombia                                                 | tribor, sandra<br>botanist<br>conservatory and botanic garden of geneva city<br>France                                                 | tribot, sandra<br>botanist<br>conservatory and botanic garden of geneva city<br>France                                          |
| TRICHAKI, KYRIAKI<br>ACADEMIC STAFF IN MUSIC EDUCATION<br>UNIVERSITY OF CRETE<br>Greece                                                          | Trier, Terry<br>Associate Professor of Biology<br>Grand Valley State University<br>United States of America (the)                      | Trierweiler, Annette<br>Postdoctoral Research Scholar in Ecology<br>University of Notre Dame<br>United States of America (the)  |
| Trifunovic, Svetlana<br>Serbia                                                                                                                   | Trigo, Ricardo<br>Prof. Climatology<br>Univ. Lisbon<br>Portugal                                                                        | Triguero-Ocaña, Roxana<br>PhD Student<br>University of Castilla-La Mancha<br>Spain                                              |
| Trillo, Paula<br>Assistant Professor of Biology<br>Gettysburg College<br>United States of America (the)                                          | Trimbos, Krijn<br>Assistan Professor<br>The Institute of Environmental Sciences<br>Netherlands (the)                                   | Trindade-Silva, Amaro Emiliano<br>Visiting Professor / Microbial genetics<br>Federal University of Ceará<br>Brazil              |
| Tripati, Aradhna<br>Associate Professor in Geochemistry, Climate Science,<br>and Environmental Science<br>UCLA<br>United States of America (the) | Tripp, Erin<br>Assistant Professor (Biology) & Curator (Herbarium)<br>University of Colorado-Boulder<br>United States of America (the) | Trippe, Aaron<br>Lab Technician/genomics<br>Center for Genome Research and Biocomputing<br>United States of America (the)       |
| Triska, Maggie<br>Postdoc Researcher - Conservation Biology<br>The University of Western Australia<br>Australia                                  | Trisos, Christopher<br>Postdoctoral Fellow<br>Socio-Environmental Synthesis Center<br>South Africa                                     | Trivette, Shawn<br>Assistant Professor of Sociology<br>University of Tennessee at Chattanooga<br>United States of America (the) |
| Triviño, María<br>Postdoctoral researcher<br>University of Jyväskylä<br>Finland                                                                  | Trnski, Thomas<br>Head of Natural Sciences<br>Auckland Museum<br>New Zealand                                                           | Trocme, Marguerite<br>environmental engineer, biologist<br>Switzerland                                                          |

|                                                                                                                                 |                                                                                                                                                                 |                                                                                                                                               |
|---------------------------------------------------------------------------------------------------------------------------------|-----------------------------------------------------------------------------------------------------------------------------------------------------------------|-----------------------------------------------------------------------------------------------------------------------------------------------|
| Troia, Angelo<br>Researcher (botany)<br>Università degli Studi di Palermo<br>Italy                                              | Trombulak, Stephen<br>Anderson Professor of Environmental and Biosphere<br>Studies<br>Middlebury College<br>United States of America (the)                      | Tromp, Jared<br>PhD Candidate<br>Deakin University<br>Australia                                                                               |
| Tronstad, Inger Kristin K.<br>PhD student in biosystematics<br>UiT The Arctic University of Norway<br>Norway                    | Troscianko, Jolyon<br>Research Fellow, Behavioural Ecology<br>University of Exeter<br>United Kingdom of Great Britain and Northern Ireland<br>(the)             | Trost, Charles<br>Ornithologist, retired<br>IdahoState University<br>United States of America (the)                                           |
| Trost, Charlesp<br>Ornithologist, retired<br>IdahoState University<br>United States of America (the)                            | Trost, Martin<br>Halle (S.)<br>Germany                                                                                                                          | Trottet, Aurore<br>Senior Aquatic Ecologist (PhD in Oceanography)<br>DHI<br>Singapore                                                         |
| Trotz, Ulric<br>Deputy Director & Science Adviser<br>Caribbean Community Climate Change Centre.<br>Belize                       | Trotz, Ulric<br>Deputy Director & Science Adviser<br>Caribbean Community Climate Change Centre<br>Belize                                                        | Troussellier, Marc<br>Research Director/ marine ecology<br>CNRS<br>France                                                                     |
| Trouwborst, Arie<br>Associate Professor of Environmental Law<br>Tilburg Law School, Tilburg University<br>Netherlands (the)     | Trovó, Marcelo<br>Prof. Dr. of Botany<br>Federal University of Rio de Janeiro<br>Brazil                                                                         | Troyer, Emily<br>Graduate Student, Marine Science<br>King Abdullah University of Science and Technology<br>Saudi Arabia                       |
| Trubl, Gareth<br>Environmental Microbiology<br>The Ohio State University<br>United States of America (the)                      | Trudeau, Joseph<br>Southwest Advocate<br>Center for Biological Diversity<br>United States of America (the)                                                      | Truman, Aubrey<br>Emeritus professor of Mathematics<br>University of Swansea<br>United Kingdom of Great Britain and Northern Ireland<br>(the) |
| Trumble, John<br>Distinguished Professor of Entomology<br>University of California, Riverside<br>United States of America (the) | Trumbo, Stephen<br>Professor, Dept. Ecology and Evolutionary Biology<br>University of Connecticut-Waterbury<br>United States of America (the)                   | Trumper, Ricardo<br>Professor Emeritus, Didactics of Physics<br>Oranim Academic Coilege of Education<br>Israel                                |
| Truong, Minh-Xuan<br>PhD Student / Conservation Psychology<br>French National Museum of National History<br>France              | Tsagarakis, Konstantinos<br>Post-doc researcher<br>Institute of Marine Biological Resources and Inland<br>Waters, Hellenic Centre for Marine Research<br>Greece | Tsai, Isheng Jason<br>Assistant Research Fellow<br>Academia Sinica<br>Taiwan                                                                  |
| Tsai, Kun-Hsien<br>Associate Professor<br>Institute of Environmental Health, National Taiwan<br>University<br>Taiwan            | Tsai, Siu Mui<br>Full Professor in Microbial Ecology<br>University of São Paulo / Center for Nuclear Energy in<br>Agriculture<br>Brazil                         | Tsai, Tony<br>Entomology<br>Taiwan                                                                                                            |

|                                                                                                                                               |                                                                                                                                   |                                                                                                                                                                                  |
|-----------------------------------------------------------------------------------------------------------------------------------------------|-----------------------------------------------------------------------------------------------------------------------------------|----------------------------------------------------------------------------------------------------------------------------------------------------------------------------------|
| Tsakalakis, Ioannis<br>Phd student<br>University of Oldenburg<br>Germany                                                                      | Tsanta Fiderana, RAKOTONANAHARY<br>Wildlife Veterinarian<br>University of Antananarivo<br>Madagascar                              | Tscharntke, Teja<br>Professor<br>Agroecology, University of Göttingen<br>Germany                                                                                                 |
| Tschitschko, Bernhard<br>Research Associate in Microbial Ecology<br>University of Technology Sydney<br>Australia                              | Tschudi, Kathrin<br>Dr. sc. nat. ETH<br>Switzerland                                                                               | Tschumi, Matthias<br>Postdoctoral researcher<br>Lund University<br>Sweden                                                                                                        |
| Tshering, Tandin<br>Environmental Manager<br>Bhutan                                                                                           | Tsiattalos, Ariana<br>Conservationist<br>NJ Dept. of Environmental Protection<br>United States of America (the)                   | Tsogtsaikhan, Altangerel<br>Assistant curator of Harold W. Manter Laboratory of<br>Parasitology<br>University of Nebraska-Lincoln State Museum<br>United States of America (the) |
| Tu, Yu-Hsuan<br>PhD candidate, Remote Sensing<br>The University of Queensland<br>Taiwan                                                       | Tuanmu, Mao-Ning<br>Assistant Research Fellow<br>Academia Sinica<br>Taiwan                                                        | Tuart, Ian<br>Project Scientist / marine Biologist<br>James Cook University<br>Australia                                                                                         |
| Tubbs, Noelle<br>University of Cape Town<br>South Africa                                                                                      | Tubenclak, Fernanda<br>MSc student - Ecology<br>Universidade Federal do Rio de Janeiro<br>Brazil                                  | Tuccio, Maria Teresa<br>Physicist<br>Italy                                                                                                                                       |
| Tucker, Caroline<br>Assistant professor, ecology and evolution<br>University of North Carolina, Chapel Hill<br>United States of America (the) | Tucker, Christopher<br>Design Engineer<br>United Kingdom of Great Britain and Northern Ireland<br>(the)                           | Tucker, Derek<br>Lecturer of Biology<br>University of West Florida<br>United States of America (the)                                                                             |
| Tudela, David<br>Full Professor and Head of the Inorganic Chemistry<br>Department<br>Universidad Autonoma de Madrid<br>Spain                  | Tuft, Katherine<br>General Manager<br>Arid Recovery<br>Australia                                                                  | tuliozi, beniamino<br>phd student, evolutionary biology<br>Università degli studi di Padova<br>Italy                                                                             |
| Tulloch ch, Ayesha<br>Research Fellow, Conservation Biology<br>University of Queensland<br>Australia                                          | Tunesi, Leonardo<br>Research Director<br>ISPRA - Italian National Institute for Environmental<br>Protection and Research<br>Italy | Tunncliffe, Verena<br>Professor; deep sea biologist<br>University of Victoria<br>Canada                                                                                          |
| Tuomisto, Hanna<br>Senior lecturer in biodiversity research<br>University of Turku<br>Finland                                                 | Turbakova, Barbora<br>PhD candidate, Zoology<br>Masaryk University, Brno<br>Czech Republic (the)                                  | Turcati, Laure<br>Research engineer in environmental sciences<br>University Pierre et Marie Curie<br>France                                                                      |

|                                                                                                                                                           |                                                                                                                                                         |                                                                                                                                                                    |
|-----------------------------------------------------------------------------------------------------------------------------------------------------------|---------------------------------------------------------------------------------------------------------------------------------------------------------|--------------------------------------------------------------------------------------------------------------------------------------------------------------------|
| Turchini, Giovanni<br>Professor (Nutrition and Food Science)<br>School of Life and Environmental Sciences, Deakin<br>University<br>Australia              | Turcios perez, Juan carlos<br>Administrador<br>Guatemala                                                                                                | Turini Farah, Fabiano<br>Researcher<br>São Paulo State University (UNESP)<br>Brazil                                                                                |
| Turnbull, Mark<br>Zoologist<br>University of Johannesburg<br>South Africa                                                                                 | Turner, Alison<br>Lecturer<br>Plymouth University<br>United Kingdom of Great Britain and Northern Ireland<br>(the)                                      | turner, andrew<br>Reader in Biogeochemistry<br>Plymouth University<br>United Kingdom of Great Britain and Northern Ireland<br>(the)                                |
| Turner, Jake<br>Graduate student in Astronomy<br>University of Virginia<br>United States of America (the)                                                 | Turner, Lucy<br>Lecturer in marine biology<br>Plymouth University<br>United Kingdom of Great Britain and Northern Ireland<br>(the)                      | Turon, Xavier<br>Research Professor, Marine Biology<br>Center for Advanced Studies of Blanes (CEAB-CSIC)<br>Spain                                                  |
| Turton, Anthony<br>Professor Environmental Management<br>- Centre for Environmental Management, University of<br>Free State, South Africa<br>South Africa | Turton, Stephen<br>Adjunct Professor of Environmental Geography<br>Central Queensland University<br>Australia                                           | Turull, Marta<br>PhD Student in Environmental Chemistry<br>IDAEA-CSIC<br>Spain                                                                                     |
| Tuulaikhuu, Baigal-Amar<br>Senior Lecturer<br>Mongolian University of Life Sciences<br>Mongolia                                                           | TUYISHIMIRE, Joseph<br>Assistant Researcher<br>Center for Geographic Information Systems and Remote<br>Sensing-University of Rwanda (CGIS-UR)<br>Rwanda | Tvardovskas, Luana<br>History<br>Unicamp<br>Brazil                                                                                                                 |
| Tveit, Alexander Tøsdal<br>Postdoctoral Researcher in environmental microbiology<br>UiT, The Arctic University of Norway<br>Norway                        | Twala, Mthokozisi<br>MSc student<br>University of Pretoria<br>South Africa                                                                              | Twiggs, Matthew<br>Senior Conservation Officer (MSc Conservation<br>Management)<br>Barn Owl Trust<br>United Kingdom of Great Britain and Northern Ireland<br>(the) |
| Twilley, Danielle<br>University of Pretoria<br>South Africa                                                                                               | Twomey, Alice<br>PhD Student, Chemical Engineering<br>University of Queensland<br>Australia                                                             | Tyburczy, Joe<br>Adjunct Professor<br>Humboldt State University<br>United States of America (the)                                                                  |
| Tye, Alan<br>Project Manager<br>International Union for Conservation of Nature<br>Mauritius                                                               | Tyler, Brett<br>Professor of Botany and Plant Pathology<br>Oregon State University<br>United States of America (the)                                    | Tylianakis, Jason<br>Professor<br>University of Canterbury<br>New Zealand                                                                                          |

|                                                                                                                                                |                                                                                                                   |                                                                                                                |
|------------------------------------------------------------------------------------------------------------------------------------------------|-------------------------------------------------------------------------------------------------------------------|----------------------------------------------------------------------------------------------------------------|
| Tyne, Julian<br>PhD Marine Science<br>Murdoch University<br>Australia                                                                          | Tysor, C. Susannah<br>PhD Candidate, Forest and Conservation Sciences<br>University of British Columbia<br>Canada | Tyteca, Daniel<br>Professor, Biodiversity Research Centre<br>Université catholique de Louvain (UCL)<br>Belgium |
| Tzanakis, Constantinos<br>Professor of mathematics & Physics<br>Dep. of Education, University of Crete<br>Greece                               | Uc Sánchez, Emmanuel *<br>Biologist Marine<br>CINVESTAV<br>Mexico                                                 | Udall, Joshua<br>Associate Professor<br>Brigham Young University<br>United States of America (the)             |
| Udayar Pillai, Surendran<br>Scientist<br>Centre for Water Resources Development and<br>Management<br>India                                     | Uddling, Johan<br>Sweden                                                                                          | Uddstrom, Michael<br>Physicist<br>National Institute of Water and Atmospheric Research<br>New Zealand          |
| Udo de Haes, Helias<br>emeritus professor environmental sciences<br>Institute of Environmental Sciences Leiden University<br>Netherlands (the) | Udrizar Sauthier, Daniel<br>Research Assistant<br>IPEEC<br>Argentina                                              | Uebel, Konrad<br>PhD Candidate - ecology<br>University of Queensland<br>Australia                              |
| Uehlinger, Christoph<br>Professor, History of Religions<br>Department of Religious Studies, University of Zurich<br>Switzerland                | Ugarte, Carolina<br>Biological Conservation<br>Universidad de Chile<br>Chile                                      | Uhl, Philipp<br>PhD student in Environmental Sciences/Ecotoxicology<br>University of Koblenz-Landau<br>Germany |
| Uiblein, Franz<br>Norway                                                                                                                       | Uildriks, Anne<br>Industrial Ecology<br>Delft University of Technology<br>Netherlands (the)                       | Ujvari, Beata<br>Senior Lecturer in Bioinformatics and Genomics<br>Deakin University<br>Australia              |
| Ullah, Zahid<br>Assistant Professor<br>University of Swat<br>Pakistan                                                                          | Ullmann, Wiebke<br>Germany                                                                                        | Ulloa, Hannah<br>Design and Marketing<br>United States of America (the)                                        |
| Ulloa, Luis<br>PhD Candidate<br>SUNY Buffalo<br>United States of America (the)                                                                 | Ulman, Aylin<br>Marine Biology research assistant<br>University of Pavia<br>Italy                                 | Ulrich, Erin<br>Laboratory Coordinator<br>Otterbein University<br>United States of America (the)               |
| Ulrich, Lukas<br>Researcher on Urban Sanitation<br>Eawag<br>Switzerland                                                                        | Uludag, Ahmet<br>Dean, Weed Scientist<br>Duzce University<br>Turkey                                               | Umana, Maria Natalia<br>Postdoc<br>United States of America (the)                                              |

|                                                                                                                                     |                                                                                                                                                                                                |                                                                                                                                           |
|-------------------------------------------------------------------------------------------------------------------------------------|------------------------------------------------------------------------------------------------------------------------------------------------------------------------------------------------|-------------------------------------------------------------------------------------------------------------------------------------------|
| Umapathy, Govindhasamy *<br>Principal Scientist<br>CSIR-Centre for Cellular and Molecular Biology<br>India                          | Umerez, Jon<br>Tenured Researcher / Philosophy of Biology<br>University of the Basque Country (UPV/EHU)<br>Spain                                                                               | Unasi, Raymond<br>Biologist/End Scientist<br>Nature Calls Ltd<br>Papua New Guinea                                                         |
| Unmack, Peter<br>Research Fellow<br>University of Canberra<br>Australia                                                             | Unruh, Sarah<br>PhD candidate, Biology<br>United States of America (the)                                                                                                                       | Unsworth, Richard<br>Marine scientists<br>Swansea University<br>United Kingdom of Great Britain and Northern Ireland (the)                |
| Upadhyay, Kavita<br>Business<br>New Zealand                                                                                         | Upham, Nathan<br>Postdoctoral Researcher in Evolutionary Biology<br>Yale University<br>United States of America (the)                                                                          | Uprety, Yadav<br>Environmental Science<br>Tribhuvan University<br>Nepal                                                                   |
| Upton, Murray<br>Retired Entomologist<br>CSIRO<br>Australia                                                                         | Ural-Blimke, Yonca<br>Biochemist, PhD candidate<br>European Molecular Biology Laboratory Hamburg<br>Germany                                                                                    | Urban, Alan<br>Entomologist (biocontrol) (retired)<br>Agricultural Research Council - Plant Protection Research Institute<br>South Africa |
| Urban, Lara<br>PhD in Biology<br>EMBL-EBI and University of Cambridge<br>United Kingdom of Great Britain and Northern Ireland (the) | Urban, Mark<br>Director, Center of Biological Risk<br>University of Connecticut<br>United States of America (the)                                                                              | Urban, Michael<br>Chair - Department of Geography<br>University of Missouri<br>United States of America (the)                             |
| Urban, Ros<br>Collections Manager - Entomology (Retired)<br>Plant Protection Research Institute<br>South Africa                     | Urbieta-Magro, Almudena<br>PhD Student<br>CIAPA-IRIAF (Centro de Investigación Apícola y Agroambiental - Instituto Regional de Investigación y Desarrollo Agroalimentario y Forestal)<br>Spain | Urbina, Ifigenia<br>PhD Student<br>CREAF<br>Spain                                                                                         |
| Urbina, Mauricio A.<br>Professor, Comparative Animal Physiology<br>Universidad de Concepcion<br>Chile                               | Urbina-Cardona, Nicolas<br>Professor<br>Pontificia Universidad Javeriana<br>Colombia                                                                                                           | Urbini, Lidia<br>Fellowship<br>Italy                                                                                                      |
| Urbisz, Anna Zofia<br>researcher<br>Faculty of Biology and Environmental Protection<br>University of Silesia<br>Poland              | Urgeghe, Anna<br>PhD candidate - ecohydrology<br>University of Alicante<br>Spain                                                                                                               | Urgeles, Roger<br>Researcher / Geology<br>Institute of Marine Sciences (CSIC)<br>Spain                                                    |

|                                                                                                                                              |                                                                                                                                            |                                                                                                                                   |
|----------------------------------------------------------------------------------------------------------------------------------------------|--------------------------------------------------------------------------------------------------------------------------------------------|-----------------------------------------------------------------------------------------------------------------------------------|
| Urgorri, Victoriano<br>Professor of Marine Zoology<br>Marine Biological Station of A Graña, University of<br>Santiago de Compostela<br>Spain | Uriarte, Ibon<br>Lecturer. Ecology<br>University of the Basque Country (UPV/EHU)<br>Spain                                                  | Uribe-Convers, Simon<br>Evolutionary Biologists<br>University of Michigan<br>Colombia                                             |
| Uribe-Rivera, David E.<br>PhD Student - Ecology<br>The University of Melbourne<br>Chile                                                      | Uriz, Maria J<br>Professor of Research<br>Consejo Superior Investigaciones Cientificas (CSIC)<br>Spain                                     | Urlaub, Morelia<br>Scientist<br>GEOMAR Helmholtz Centre for Ocean Research<br>Germany                                             |
| Urmee, Tania<br>Senior Lecturer<br>Murdoch Univeristy<br>Australia                                                                           | Urosevic, Milivoje *<br>DWM,MVM,PhD, Member of Board<br>CENTER FOR PRESERVATION OF INDIGENOUS<br>BREEDS/CEPIB<br>Serbia                    | Urquhart, Julie<br>Research Associate<br>Imperial College London<br>United Kingdom of Great Britain and Northern Ireland<br>(the) |
| Urrego, Ligia E.<br>Forest Engineer<br>Universidad Nacional de Colombia - Sede Medellín<br>Colombia                                          | Urrutia Cordero, Pablo<br>Doctor in Environmental Sciences<br>Uppsala University<br>Sweden                                                 | Urrutxurtu, Iñaki<br>Animal physiology<br>University of Basque Country<br>Spain                                                   |
| Urs, Kormann<br>Postdoc, Ecology & Forestry<br>Oregon State University, Corvallis, OR<br>United States of America (the)                      | Urza, Alexandra<br>Ecologist, PhD Candidate<br>University of Nevada-Reno<br>United States of America (the)                                 | Usen, Elizabeth<br>Graduate Teaching Assistant / Plant Ecology<br>Akwa-Ibom State University<br>Nigeria                           |
| Usher, Graham<br>Conservationist<br>Pro Natura Foundation<br>Indonesia                                                                       | Usher, Michael<br>Honorary Professor<br>University of Stirling<br>United Kingdom of Great Britain and Northern Ireland<br>(the)            | Ussher, Simon<br>Marine Chemist<br>University of Plymouth<br>United Kingdom of Great Britain and Northern Ireland<br>(the)        |
| Uszko, Wojciech<br>Ecology<br>Umeå University<br>Poland                                                                                      | Utz, Ryan<br>Assistant professor of water resources<br>Falk School of Sustainability, Chatham University<br>United States of America (the) | Uusimäki, Toni<br>Post-Doc / Material Science<br>EAWAG<br>Switzerland                                                             |
| Úveges, Bálint<br>assistant research fellow - evolutionary ecology and<br>herpetology<br>Hungarian Academy of Sciences<br>Hungary            | UWAGBAE, MICHAEL<br>ENVIRONMENTALIST<br>WETLANDS INTERNATIONAL<br>Nigeria                                                                  | Uys, Vivienne<br>Researcher Entomology<br>Plant Protection Research Institute<br>South Africa                                     |
| Uziel, Joe<br>Archaeologist<br>Israel Antiquities Authority<br>Israel                                                                        | Vacca, Eligio<br>Lecturer - Anthropology<br>University of Bari Aldo Moro<br>Italy                                                          | Vacchiano, Giorgio<br>Scientific Project Officer<br>European Commission, Joint Research Centre<br>Italy                           |

|                                                                                                                                |                                                                                                                                       |                                                                                                                                               |
|--------------------------------------------------------------------------------------------------------------------------------|---------------------------------------------------------------------------------------------------------------------------------------|-----------------------------------------------------------------------------------------------------------------------------------------------|
| Vacelet, Jean<br>Marine Biology<br>CNRS<br>France                                                                              | Vaclavik, Tomas<br>Assistant Professor<br>Palacky University Olomouc<br>Czech Republic (the)                                          | Vadén, Tere<br>Associate Professor, Researcher<br>BIOS research unit<br>Finland                                                               |
| Vahabzadeh, Abdol-Hossein<br>Retired Ecology and founder of nature schools in Iran<br>Iran (Islamic Republic of)               | Vaidyanathan, Srinivas<br>Senior Scientist<br>Foundation for Ecological Research, Advocacy and<br>Learning (FERAL)<br>India           | Vaillancourt, Cathy<br>Professor, reproductive toxicology<br>INRS-Institut Armand Frappier<br>Canada                                          |
| Val, Adalberto<br>Researcher/Environmental Adaptation<br>Brazilian National Institute for Research of the Amazon<br>Brazil     | Valachovič, Dušan<br>direktor<br>Administration Protected Landscape Area Transmontana<br>(Záhorie)<br>Slovakia                        | Valavanis, Vasilis<br>Research Scientist / Geographic Information Science<br>Hellenic Center for Marine Research<br>Greece                    |
| Valcerde, Sebastián<br>Biólogo<br>Pontificia Universidad Católica del Ecuador<br>Ecuador                                       | Valdecantos, Alejandro<br>Senior Researcher<br>Mediterranean Center for Environmental Studies (CEAM)<br>Spain                         | Valdes, David<br>MARINE CHEMISTRY<br>CINVESTAV MERIDA<br>Mexico                                                                               |
| Valdes, Jose<br>Professor of Geophysics<br>Universidad Nacional Autónoma de México<br>Mexico                                   | Valdés Castro, Rolando<br>professor<br>University of Burgos<br>Spain                                                                  | Valdez-Ward, Evelyn<br>Ph.D. student in Ecology and Evolutionary Biology<br>University of California-Irvine<br>United States of America (the) |
| Valdivia, Abel<br>Marine Biologist<br>Center for Biological Diversity<br>United States of America (the)                        | Valdivia, Paulo *<br>PhD researcher<br>University of Edinburgh<br>United Kingdom of Great Britain and Northern Ireland<br>(the)       | Valdivia-Carrillo, Tania<br>PhD Marine Ecology<br>CICESE<br>Mexico                                                                            |
| Valdovinos, Fernanda<br>Assistant Professor of Theoretical Ecology<br>University of Michigan<br>United States of America (the) | Vale, Ángel<br>Ecology<br>Universidad de Vigo<br>Spain                                                                                | Valença, David<br>Student of PhD<br>University federal of Rio de Janeiro<br>Brazil                                                            |
| Valencia, Enrique<br>Post-doctoral ecology<br>University of South Bohemia<br>Spain                                             | Valencia, Lina M<br>PhD Candidate<br>University of Texas at Austin<br>United States of America (the)                                  | Valencia Oleta, Carlos Enrique *<br>Mathematics Professor<br>Mathematics Department, Cinvestav-IPN<br>Mexico                                  |
| Valente, Luis<br>Biologist, Research Fellow<br>Museum für Naturkunde Berlin<br>Germany                                         | Valentine, James<br>Professor of Integrative Biology, Emeritus<br>University of California, Bekeley<br>United States of America (the) | Valentine, Peter<br>Environmental Science and Geography<br>James Cook University<br>Australia                                                 |



|                                                                                                                           |                                                                                                    |                                                                                                                                                                                                 |
|---------------------------------------------------------------------------------------------------------------------------|----------------------------------------------------------------------------------------------------|-------------------------------------------------------------------------------------------------------------------------------------------------------------------------------------------------|
| Valenzuela, Leonor<br>Analysis and Synthesis Coordinator/Conservation-Ecology<br>WCS<br>Colombia                          | Valenzuela Perez, Leonardo<br>Human Geography<br>Independent Researcher<br>Chile                   | Valenzuela-Galvan, David<br>Full Professor and Academic Researcher on Ecology and<br>conservation<br>Centro de Investigación en Biodiversidad y Conservacion-<br>UAEM / BIOTOPIA A.C.<br>Mexico |
| Valera, Francisco<br>Staff Researcher. Evolutionary Ecology<br>Estación Experimental de Zonas Aridas (EEZA-CSIC)<br>Spain | Valera, Salvador<br>Linguistics (but this is relevant to all)!!<br>University of Granada<br>Spain  | Valeriani, Davide<br>Senior Research Officer<br>University of Essex<br>United Kingdom of Great Britain and Northern Ireland<br>(the)                                                            |
| Valerien, Zinsou *<br>Plant pathologist<br>University of Parakou<br>Benin                                                 | Valery Binda, Aghah<br>Biodiversity Conservation<br>University of Dschang<br>Cameroon              | Valiente-Banuet, Alfonso<br>Research Ecologist<br>Instituto de Ecología/ Centro de Ciencias de la<br>Complejidad, Universidad Nacional Autónoma de México<br>Mexico                             |
| Valladares, Fernando<br>Research Professor in Ecology<br>Spanish Council for Scientific Research (CSIC)<br>Spain          | Valladares, Gustavo<br>Professor / Soil Science<br>Universidade Federal do Piauí.<br>Brazil        | Valle, Mireia<br>Research associate<br>Escuela de Gestión Ambiental, Pontificia Universidad<br>Católica de Ecuador Sede Esmeraldas PUCESE<br>Ecuador                                            |
| Vallenduuk, Hendrik J.<br>Specialist in Chironomidae / analist macrofauna<br>Netherlands (the)                            | Valles, Henri<br>Lecturer in Ecology<br>The University of the West Indies at Cave Hill<br>Barbados | Valls, Aleix<br>PhD Student<br>NDSU<br>United States of America (the)                                                                                                                           |
| Valqui, Thomas<br>Wildlife Biologist<br>CORBIDI (Centro de Ornitología y Biodiversidad)<br>Peru                           | Valsecchi, João<br>Scientific Director<br>Mamirauá Sustainable Development Institute<br>Brazil     | Valtueña, Francisco Javier<br>Professor assistant / Botany<br>Universidad de Extremadura<br>Spain                                                                                               |
| Valverde, Javier<br>PhD<br>Universidad de Granada<br>Spain                                                                | Valverde, Sebastien<br>Postdoc Neuroscience<br>College de France<br>France                         | Valverde-Barrantes, Oscar<br>Postdoctorate Fellow<br>Florida International University<br>United States of America (the)                                                                         |
| Vamosi, Jana<br>Associate Professor<br>University of Calgary<br>Canada                                                    | Van, Anh<br>MSc Biology, Student<br>Freie Universität Berlin<br>Germany                            | van Alphen, Joris<br>Netherlands (the)                                                                                                                                                          |

|                                                                                                                                                   |                                                                                                      |                                                                                                                                                                                       |
|---------------------------------------------------------------------------------------------------------------------------------------------------|------------------------------------------------------------------------------------------------------|---------------------------------------------------------------------------------------------------------------------------------------------------------------------------------------|
| Van Antro, Morgane<br>PhD Student<br>uNamur<br>Belgium                                                                                            | van Assen, Bart W<br>Interim Chairman<br>Indonesian Auditor Network<br>Indonesia                     | Van Bael, Rik<br>Geologist<br>KU Leuven<br>Belgium                                                                                                                                    |
| Van Bastelaere, Katrijn<br>Biologist<br>Belgium                                                                                                   | van Beek, Femke<br>post-doc<br>Cal State LA<br>United States of America (the)                        | van Beijnen, Jonah<br>Marine Biologist / Consultant<br>Centre for Sustainability<br>Spain                                                                                             |
| Van Belleghem, Steven<br>Postdoc<br>Cambridge University<br>United Kingdom of Great Britain and Northern Ireland (the)                            | van Berkel, Jenna<br>MSc Botany student<br>Stellenbosch University<br>South Africa                   | van Bochove, Ger<br>MSc Civil Engineering. Wildlife studies and maintenance of nature reserves<br>SNiP<br>Netherlands (the)                                                           |
| van Bommel, Joanna<br>MSc Student, Ecology<br>University of British Columbia<br>Canada                                                            | van Brakel, Martin<br>Scientist, resilient small-scale fisheries<br>WorldFish<br>Bangladesh          | van Breugel, Michiel<br>Assistant professor environmental studies / Ecology<br>Yale-NUD College<br>Singapore                                                                          |
| Van Cayzeele, Corinna<br>Conservation Biology/ M.Sc. Student in International Nature Conservation<br>Georg-August-University Göttingen<br>Germany | Van Coller, Helga<br>PhD Student<br>North-West University<br>South Africa                            | Van Damme, Kay<br>Postdoctoral Researcher (island biodiversity conservation and freshwater biology)<br>Senckenberg Research Institute and Natural History Museum Frankfurt<br>Germany |
| van de Giesen, Nick<br>Water Resources Engineering<br>Delft university of Technology<br>Netherlands (the)                                         | Van de Perre, Frederik<br>PhD student<br>University of Antwerp<br>Belgium                            | van de Pol, Martijn<br>Researcher in climate change ecology<br>Netherlands Institute of Ecology<br>Netherlands (the)                                                                  |
| Van de Velde, Isabella<br>PhD Biology, project manager<br>Royal Belgian Institute of Natural Sciences<br>Belgium                                  | van de Velde, Sabrina<br>Palaeoecologist<br>Naturalis Biodiversity Center<br>Netherlands (the)       | Van de Waal, Dedmer<br>Research Scientist<br>Netherlands Institute of Ecology<br>Netherlands (the)                                                                                    |
| van de Waal, Erica<br>Prof. in Primatology<br>University of Lausanne<br>Switzerland                                                               | Van de Walle, Joanie<br>Student<br>Université de Sherbrooke<br>Canada                                | van de Water, Bob<br>prof Drug Safety Sciences<br>Leiden University<br>Netherlands (the)                                                                                              |
| van den Bel, Martijn<br>archaeologist<br>Inrap<br>France                                                                                          | van den Berg, Eduardo<br>Professor of Botany and Ecology<br>Universidade Federal de Lavras<br>Brazil | van den Berg, Henk<br>Wageningen University<br>Netherlands (the)                                                                                                                      |

|                                                                                                                       |                                                                                                                                                       |                                                                                                                                                   |
|-----------------------------------------------------------------------------------------------------------------------|-------------------------------------------------------------------------------------------------------------------------------------------------------|---------------------------------------------------------------------------------------------------------------------------------------------------|
| van den Bos, Wouter<br>Max Planck Institute for Human Development<br>Germany                                          | van den Bosch, Ruben<br>Student Biology<br>University of Utrecht<br>Netherlands (the)                                                                 | van den Brink, Liesbeth<br>PhD Vegetation ecology<br>Univerisity Tuebingen<br>Germany                                                             |
| Van den Broeck, Maarten<br>PhD in Aquatic Ecology, Data Scientist<br>KU Leuven<br>Belgium                             | Van den Bulcke, Jan<br>Tenure Track professor<br>Ghent University<br>Belgium                                                                          | Van den Eynde, Dries<br>Physical Oceanographer<br>Royal Belgian Institute of Natural Sciences<br>Belgium                                          |
| Van Den Hoek, Jamon<br>United States of America (the)                                                                 | van den Hoogen, Johan<br>PhD student<br>Wageningen University<br>Netherlands (the)                                                                    | Van den Wyngaert, Silke<br>Postdoc, aquatic microbial ecology<br>Leibniz-Institute of Freshwater Ecology and Inland<br>Fisheries (IGB)<br>Germany |
| Van Der Aart, Jasper<br>Netherlands (the)                                                                             | van der Geer, Alexandra<br>biogeography<br>Naturalis Biodiversity Center<br>Netherlands (the)                                                         | van der Geest, Matthijs<br>Postdoc<br>UMR-MARBEC<br>France                                                                                        |
| van der Heiden, Albert M.<br>Senior researcher<br>Research Center in Food and Development<br>Mexico                   | van der Heyden, Torsten<br>Germany                                                                                                                    | van der Kooi, Casper<br>Research fellow<br>University of Lausanne<br>Switzerland                                                                  |
| van der Lans, Hans<br>Biologist-ecologist<br>Director of Ecoplan Natuurontwikkeling, Netherlands<br>Netherlands (the) | van der Lee, Eefke<br>PostDoc physical oceanography<br>Leibniz Institute for Baltic Sea Research<br>Germany                                           | van der Lee, Gea<br>PhD candidate, Aquatic Environmental Ecology<br>IBED, University of Amsterdam<br>Netherlands (the)                            |
| van der Linden, Anton<br>Ecologist<br>Netherlands (the)                                                               | Van der Made, Jan<br>scientific researcher<br>Consejo Superior de Investigaciones Cientificas<br>Spain                                                | van der Meij, Jacqueline<br>PhD Student/ Neurobiology<br>Germany                                                                                  |
| van der Meijden, Arie<br>Research scientist<br>University of Porto<br>Portugal                                        | van der Merwe, Gottlieb<br>Engineering Manager - System Engineering<br>Reutech Radar Systems<br>South Africa                                          | van der Merwe, Sarel<br>Chair: African Lion Working Group, IUCN/SSC<br>African Lion Working Group<br>South Africa                                 |
| van der Merwe, Stephni<br>Environmental scientist<br>University of Pretoria<br>South Africa                           | Van der Molen, Silvina<br>Researcher - Marine Biologist<br>IBIOMAR (Instituto de Biología de Organismos Marinos) -<br>CCT CONICET CENPAT<br>Argentina | van der Ploeg, Jan<br>Anthropologist<br>WorldFish<br>Solomon Islands                                                                              |

|                                                                                                                              |                                                                                                                       |                                                                                                                                                                          |
|------------------------------------------------------------------------------------------------------------------------------|-----------------------------------------------------------------------------------------------------------------------|--------------------------------------------------------------------------------------------------------------------------------------------------------------------------|
| van der Reijden, Karin<br>PHD<br>University of Groningen<br>Netherlands (the)                                                | van der Sanden, Mathijs<br>Student<br>Van Hall Larenstein University of Applied Sciences<br>Netherlands (the)         | Van der Sluis, Theo<br>Researcher, Landscape Ecology<br>Wageningen Environmental Research<br>Netherlands (the)                                                           |
| van der Spoel, David<br>Professor of Biology<br>Uppsala University<br>Sweden                                                 | van der Voort, Hein<br>Linguist<br>Museu Paraense Emilio Goeldi<br>Brazil                                             | van der Waals, Jacquie<br>Plant Pathology<br>van der Waals<br>South Africa                                                                                               |
| van der Zaag, Pieter<br>Water Resources Management<br>IHE Delft<br>Netherlands (the)                                         | Van der Zanden, Stef<br>Immunology/medical biology student<br>Wageningen University and Research<br>Netherlands (the) | Van Deun, Rob<br>Lecturer Life Sciences<br>Thomas More University College<br>Belgium                                                                                     |
| Van Dooren, Tom JM<br>CNRS researcher<br>Institute of Ecology and Environmental Sciences iEES Paris<br>France                | Van Dyke, James<br>Lecturer in Ecology<br>Charles Sturt University<br>Australia                                       | van Eeden, Lily<br>PhD Student<br>The University of Sydney<br>Australia                                                                                                  |
| van Galen, Laura<br>Ecology<br>University of Tasmania<br>Australia                                                           | van Gils, Jan *<br>Senior Scientist<br>NIOZ Royal Netherlands Institute for Sea Research<br>Netherlands (the)         | van Ginkel, Annelies<br>PhD student Conservation Ecology<br>University of Groningen<br>Netherlands (the)                                                                 |
| Van Goethem, Jackie L.<br>Executive Secretary<br>King Leopold III Fund for Nature Exploration and<br>Conservation<br>Belgium | van Gool, Ella<br>Doctoral Candidate<br>University of Waikato<br>New Zealand                                          | van Haren, Joost<br>Assistant Research Professor, Biosphere<br>2/Interdisciplinary Faculty, UA Honors College<br>University of Arizona<br>United States of America (the) |
| Van Harskamp, Michiel<br>Science education researcher<br>Utrecht University<br>Netherlands (the)                             | Van Harten, Dick<br>Associate professor (retired)/ Geologist<br>Free University, Amsterdam<br>Netherlands (the)       | van Hasselt, Sjoerd<br>PhD Chronobiology<br>University of Groningen<br>Netherlands (the)                                                                                 |
| van Helsdingen, Peter<br>Honorary Staff Member<br>Naturalis Biodiversity Centre<br>Netherlands (the)                         | van Herwerden, Lynne<br>James Cook University<br>Australia                                                            | Van Hesteren, Hannah<br>Conservationist<br>United Kingdom of Great Britain and Northern Ireland<br>(the)                                                                 |
| van Hooidonk, Ruben<br>Assistant Scientist<br>NOAA AOML / University of Miami CIMAS<br>United States of America (the)        | Van Horn, Russ<br>Scientist<br>San Diego Zoo Global<br>United States of America (the)                                 | van Impelen, Ben<br>Environmental Sciences, Social Psychology and Migration<br>Sciences<br>Utrecht University<br>Netherlands (the)                                       |

|                                                                                                                                      |                                                                                                                                  |                                                                                                                                                 |
|--------------------------------------------------------------------------------------------------------------------------------------|----------------------------------------------------------------------------------------------------------------------------------|-------------------------------------------------------------------------------------------------------------------------------------------------|
| Van Kanten, Rudi<br>Director<br>Tropenbos Suriname<br>Suriname                                                                       | van Keulen, Mike<br>Senior Lecturer in Marine Biology<br>Murdoch University<br>Australia                                         | Van Kirk, Kray<br>PhD - Fisheries<br>University of Alaska Fairbanks<br>United States of America (the)                                           |
| van Kleunen, Mark<br>Professor of Ecology<br>University of Konstanz<br>Germany                                                       | van Klink, Roel<br>Conservation biology<br>University of Bern<br>Switzerland                                                     | van Kuijk, Silvy<br>PhD student, Department of Anthropology<br>The University of Texas at Austin<br>United States of America (the)              |
| Van Langevelde, Frank<br>Associate Professor Animal Movement and Population<br>Biology<br>Wageningen University<br>Netherlands (the) | Van Loo, Maarten<br>PhD student<br>KULeuven<br>Belgium                                                                           | Van Nice, Lee<br>Physical Chemist in Research Labs<br>Eastman Kodak Labs, Tektronix Labs, and Hewlett Packard<br>United States of America (the) |
| Van Oosten, Raoul<br>Postdoctoral researcher in evolutionary biology<br>Vrije Universiteit Amsterdam<br>Netherlands (the)            | van Oosterzee, Penny<br>Adjunct Principle Research Fellow<br>James Cook University<br>Australia                                  | Van Opzeeland, Ilse<br>Senior Scientist/Behavioral Ecology<br>Alfred-Wegener Institute<br>Germany                                               |
| Van Orshoven, Jos<br>Professor Earth & Environmental Sciences<br>University of Leuven<br>Belgium                                     | van Pomeran, M.<br>PhD candidate in ecotoxicology<br>Institute of environmental sciences, Leiden University<br>Netherlands (the) | van Proosdij, André<br>PhD student<br>Wageningen University & Research<br>Netherlands (the)                                                     |
| van Puijenbroek, Marinka<br>PhD student / Ecology<br>Wageningen University<br>Netherlands (the)                                      | van Riemsdijk, Isolde<br>PhD student Evolutionary Biology<br>Naturalis Biodiversity Center<br>Netherlands (the)                  | van Rijn, Paul<br>Senior Scientist / Ecology<br>University of Amsterdam<br>Netherlands (the)                                                    |
| van Schaik, Jaap<br>Postdoctoral Researcher / Evolutionary Ecology<br>University of Greifswald<br>Germany                            | Van Schependom, Jeroen<br>FWO Post-doc<br>Vrije Universiteit Brussel<br>Belgium                                                  | van Schooten, Bas<br>phd student<br>uprrp<br>Puerto Rico                                                                                        |
| Van Sluys, Monique<br>Conservation Officer<br>Taronga Conservation Society Australia<br>Australia                                    | Van Soest, Rob<br>associate scientist Dept. Marine Biodiversity<br>Naturalis Biodiversity Center, Leiden<br>Netherlands (the)    | van Staden, Nanette<br>PhD student, Environmental Sciences<br>North-West University<br>South Africa                                             |
| van Treeck, Ruben<br>Freshwater Ecology/Fish Ecology<br>Leibnitz-Institute for Freshwater Ecology and Inland<br>Fisheries<br>Germany | Van Valkenburgh, Blaire<br>Professor<br>UCLA<br>United States of America (the)                                                   | van Vliet, Jasper<br>Assistant Professor in Land Use Science<br>VU University Amsterdam<br>Netherlands (the)                                    |

|                                                                                                                                                                    |                                                                                                                                                          |                                                                                                                                                                            |
|--------------------------------------------------------------------------------------------------------------------------------------------------------------------|----------------------------------------------------------------------------------------------------------------------------------------------------------|----------------------------------------------------------------------------------------------------------------------------------------------------------------------------|
| van Wijk, Serinde<br>Dr in Fisheries Genetics/ Low Carbon, Energy & Environment<br>Bangor University<br>United Kingdom of Great Britain and Northern Ireland (the) | Van Wijmeersch, Paul<br>MSc in Agricultural Sciences<br>Belgium                                                                                          | van Wilgen, Brian<br>Professor of Ecology<br>Stellenbosch University<br>South Africa                                                                                       |
| van Wilgen, Nicola<br>Scientist, Global environmental change<br>SANParks<br>South Africa                                                                           | van Willigen, Judith<br>Teacher biology<br>Schoonhovens College<br>Netherlands (the)                                                                     | van Wordragen, Monique<br>Manager Institute for Biodiversity and Biosystem Dynamics<br>Univeristy of Amsterdam<br>Netherlands (the)                                        |
| Van Wyk, Leon<br>Graduate student Aquaculture<br>James Cook University<br>Australia                                                                                | van Ypersele, Jean-Pascal<br>Full Professor, Climate science<br>Université catholique de Louvain, Earth and Life Institute<br>Belgium                    | van Zinnicq Bergmann, Maurits<br>PhD student, Principal investigator<br>Florida International University - Bimini Biological Field Station Foundation<br>Netherlands (the) |
| van Zwieten, P.A.M.<br>Fisheries Ecology and Management<br>Wageningen University<br>Netherlands (the)                                                              | Vanbeveren, Stefan Paula Patrick<br>Post doctoral researcher in Biology<br>University of Antwerp<br>Belgium                                              | Vance, Patti<br>Faculty Coordinator<br>Point Blue Conservation Science<br>United States of America (the)                                                                   |
| Vanclooster, Marnik<br>Full professor<br>Université catholique de Louvain, Earth and Life Institute<br>Belgium                                                     | Vande weghe, Jean Pierre<br>Medecine, Conservation Biology<br>Independent consultant<br>Belgium                                                          | Vandebroek, Ina<br>Ethnobotanist<br>New York Botanical Garden<br>United States of America (the)                                                                            |
| Vandecasteele, Grégoire<br>Researcher cardiac physiology<br>Inserm<br>France                                                                                       | Vandelac, Louise<br>Professeure Institut des sciences de l'environnement et département de sociologie<br>Université du Québec à Montréal, UQAM<br>Canada | vanden Hooff, Rian<br>Ecologist<br>State of Oregon DEQ<br>United States of America (the)                                                                                   |
| Vandenabeele, Sylvie<br>Germany                                                                                                                                    | Vandenbergh, David<br>Professor of biobehavioral health<br>The Pennsylvania State University<br>United States of America (the)                           | Vandenbroucke, Dirk<br>Dr. Sc. Technology and Innovation<br>Agfa Healthcare NV<br>Belgium                                                                                  |
| Vander Linden, Charles<br>PhD Student<br>Université catholique de Louvain<br>Belgium                                                                               | Vander Zanden, Jake<br>Professor, Center for Limnology<br>University of Wisconsin - Madison<br>United States of America (the)                            | Vandergon, Thomas<br>Professor of Biology<br>Pepperdine University<br>United States of America (the)                                                                       |

|                                                                                                                                                                                     |                                                                                                                                                                 |                                                                                                                                        |
|-------------------------------------------------------------------------------------------------------------------------------------------------------------------------------------|-----------------------------------------------------------------------------------------------------------------------------------------------------------------|----------------------------------------------------------------------------------------------------------------------------------------|
| Vandergon, Virginia<br>Professor of Biology<br>California State University, Northridge<br>United States of America (the)                                                            | Vanderwoude, Casper<br>Ecologist<br>University of Hawaii<br>United States of America (the)                                                                      | Vandrovцова, Marta<br>Postdoctoral Researcher<br>Institute of Physiology<br>Czech Republic (the)                                       |
| Vandrovcová, Tereza<br>Sociology/Critical Animal Studies<br>University of New York in Prague/ Charles University<br>Czech Republic (the)                                            | Vanegas, Deyanira<br>Economist<br>Fundación para la Conservación y el Desarrollo Sostenible<br>Colombia                                                         | Vanek, John<br>Research Assistant, Wildlife Ecology and Conservation<br>Northern Illinois University<br>United States of America (the) |
| Vanermen, Iris<br>PhD Bio-economics<br>KU Leuven<br>Belgium                                                                                                                         | Vanessa, Craigie<br>ecologist<br>Department of Environment, Land, Water and Planning<br>Australia                                                               | Vanholsbeeck, Olivier<br>Computer scientist<br>Uglylab.science<br>France                                                               |
| Vanhove, Maarten P.M.<br>scientist in the programme "Capacities for Biodiversity<br>and Sustainable Development" (CEBioS)<br>Royal Belgian Institute of Natural Sciences<br>Belgium | Vanierschot, Laura<br>PhD Student-<br>KU Leuven<br>Belgium                                                                                                      | Vanmaercke, Matthias<br>Professor in Geography<br>University of Liege<br>Belgium                                                       |
| Vannoppen, Astrid<br>PhD student<br>Division Forest, Nature and Landscape, KU Leuven<br>Belgium                                                                                     | Vanormelingen, Pieter<br>Doctor in Biology, currently scientist in the research<br>division of a nature conservation agency<br>Natuurpunt Studie vzw<br>Belgium | Vanreusel, Ann<br>Professor Marine Biology<br>Ghent University<br>Belgium                                                              |
| Vanreusel, Wouter<br>Biologist<br>Natuurpunt Studie<br>Belgium                                                                                                                      | Vanstockem, Jan<br>Doctoral Researcher<br>KU Leuven<br>Belgium                                                                                                  | Vanthomme, Hadrien P.A.<br>Conservation Biologist<br>Smithsonian Institution<br>United States of America (the)                         |
| Vanuytrecht, Eline<br>Soil, Plant & Water Management<br>KU Leuven University<br>Belgium                                                                                             | VanVliet-Lanoe, Brigitte *<br>CNRS emeritus<br>Geosciences Ocean, Institut Universitaire Européen de la<br>Mer France<br>France                                 | Vara León, Enrique<br>Molecular Biology<br>Spain                                                                                       |
| Varade, Divyesh<br>PhD student<br>Indian Institute of Technology Kanpur<br>India                                                                                                    | Varah, Alexa<br>Postdoctoral researcher<br>Institute of Zoology<br>United Kingdom of Great Britain and Northern Ireland<br>(the)                                | Varajão, Guilherme<br>Professor<br>UFVJM<br>Brazil                                                                                     |

|                                                                                                                                          |                                                                                                                                                                                            |                                                                                                                                     |
|------------------------------------------------------------------------------------------------------------------------------------------|--------------------------------------------------------------------------------------------------------------------------------------------------------------------------------------------|-------------------------------------------------------------------------------------------------------------------------------------|
| Varassin, Isabela<br>Professor/ Ecologist<br>Universidade Federal do Paraná<br>Brazil                                                    | Varela, Miguel *<br>Phd Researcher<br>University of Exeter<br>Portugal                                                                                                                     | Varela, Pablo<br>Researcher Entomology<br>Museo de La Plata<br>Argentina                                                            |
| Varela, Susana<br>Post-doc, Behavioural Biology<br>Instituto Gulbenkian de Ciência<br>Portugal                                           | Varela, Zulema<br>PhD researcher<br>University of de Santiago de Compostela<br>Spain                                                                                                       | Vargas, Alexander<br>Associate Professor<br>Department of Biology, University of Chile<br>Chile                                     |
| Vargas, Laura M.<br>Biologist, ecologist conservationist<br>Universidad Nacional de Colombia<br>Colombia                                 | Vargas, Olga<br>PhD candidate<br>Nelson Mandela Unviersity<br>South Africa                                                                                                                 | Vargas Castillo, Reinaldo<br>Assistant Professor, Lichenologist<br>Universidad Metropolitana de Ciencias de la Educación<br>Chile   |
| Vargas Poncini, Jose Luis<br>Civil Servant / Environmental biologist<br>CEDEX (Spanish Ministry of Environment and Civil Works)<br>Spain | Vargas-Rodríguez, Renzo<br>Invited professor and researcher/ Biologist<br>Universidad Mayor Real y Pontificia de San Francisco<br>Xavier de Chuquisaca<br>Bolivia (Plurinational State of) | Varley, John D. *<br>Natural Sciences Administrator<br>National Park Service<br>United States of America (the)                      |
| Varley, Nathan<br>Ecology Educator<br>Yellowstone Wolf Tracker, THE WILD SIDE LLC<br>United States of America (the)                      | Varpe, Øystein<br>Professor of ecology<br>Department of Arctic Biology, University Centre in<br>Svalbard<br>Norway                                                                         | Varzinczak, Luiz H.<br>Ecology<br>Universidade Federal do Paraná<br>Brazil                                                          |
| Vasconcellos, Maria<br>Social psychology - Social and Environmental Research<br>University of Sao Paulo<br>Brazil                        | Vasconcellos, Mariana<br>Post-doctoral researcher<br>New York Botanical Garden<br>Brazil                                                                                                   | Vasconcellos, Vinicius<br>Brazil                                                                                                    |
| Vasconcelos, Sasha<br>PhD student<br>CIBIO/InBIO/University of Porto<br>Portugal                                                         | Vasey, Adrienne<br>Lecturer, Biology<br>The Pennsylvania State University<br>United States of America (the)                                                                                | Vasey, Natalie<br>Professor of Biological Anthropology<br>Portland State University<br>United States of America (the)               |
| Vasil'eva, Ekaterina *<br>Dr. Sci.<br>M.V. Lomonosov Moscow State University<br>Russian Federation (the)                                 | Vasilevska, Marinela<br>PhD Geneticist<br>Clinical Hospital Acibadem Sistina<br>Macedonia, Republic of (the former Yugoslavia)                                                             | Vasquez, Miguel Angel<br>Conservation of nature and natural protected areas<br>El Colegio de la Frontera Sur<br>Mexico              |
| Vasquez, Paulina<br>Geologist<br>sernageomin<br>Chile                                                                                    | Vass, Máté<br>PhD student<br>Uppsala University<br>Sweden                                                                                                                                  | Vasudevan, Karthikeyan<br>Senior Principal Scientist<br>CSIR-CCMB Laboratory for the Conservation of<br>Endangered Species<br>India |



|                                                                                                                                                                                                    |                                                                                                                                                      |                                                                                                                                                                      |
|----------------------------------------------------------------------------------------------------------------------------------------------------------------------------------------------------|------------------------------------------------------------------------------------------------------------------------------------------------------|----------------------------------------------------------------------------------------------------------------------------------------------------------------------|
| Vatanen, Tommi<br>PhD in computational biology<br>Broad Institute of MIT and Harvard<br>United States of America (the)                                                                             | Vatov, Emil<br>PhD<br>Universität Hohenheim<br>Germany                                                                                               | Vaughan, Mace<br>Conservation Biologist / Entomologist<br>Xerces Society for Invertebrate Conservation<br>United States of America (the)                             |
| Vavourakis, Charlotte<br>PhD student, Freshwater and Marine Microbiology<br>Institute for Biodiversity and Ecosystem Dynamics,<br>Faculty of Science, University of Amsterdam<br>Netherlands (the) | Vaz Jauri, Patricia<br>Postdoctorate<br>Instituto de Investiigaciones Biológicas Clemente Estable<br>Uruguay                                         | Vazquez, Ella<br>Professor Molecular Ecology<br>Instituto de Ecologia, UNAM<br>Mexico                                                                                |
| Vazquez, Luis-Bernardo<br>Researcher<br>El Colegio de la Frontera Sur<br>Mexico                                                                                                                    | Vazquez, M. Angeles<br>Profesora Universidad<br>Universidad Complutense de Madrid<br>Spain                                                           | Vazquez, Victoria *<br>Biologa<br>Universidad Nacional de Asuncion<br>Paraguay                                                                                       |
| Vázquez, Diego<br>Principal Researcher and Associate Professor<br>CONICET and National University of Cuyo<br>Argentina                                                                             | Vázquez, Jorge<br>Academic/biologist<br>Universidad Autónoma de Tlaxcala<br>Mexico                                                                   | Vazquez Garcia, Eusebi<br>Assistant teacher, biogeochemistry<br>University of Barcelona<br>Spain                                                                     |
| VAZQUEZ PARDO, FRANCISCO MARIA<br>Hear Section Biodiversity and Forestry<br>CICYTEX-LA ORDEN<br>Spain                                                                                              | Vázquez-de-la-Cueva, Antonio<br>Researcher in Forest Ecology<br>CIFOR-INIA<br>Spain                                                                  | Veas, Francisco *<br>Research Professor<br>French Research Institute for Development (IRD)<br>France                                                                 |
| Veazey, Lindsay<br>Spatial ecologist<br>University of Hawaii<br>United States of America (the)                                                                                                     | Vecchi, Fabrizio<br>Biorobotics<br>Stazione Zoologica Anton Dohrn<br>Italy                                                                           | Veen, Ciska<br>postdoctoral researcher<br>Netherlands Institute of Ecology<br>Netherlands (the)                                                                      |
| Veenendaal, Elmar<br>Associate professor, System Ecology<br>Wageningen University<br>Netherlands (the)                                                                                             | Vega Rivera, Jorge Humberto<br>Avian ecologist<br>Universidad Nacional Autónoma de México<br>Mexico                                                  | Vega-Cendejas, Maria Eugenia<br>Research/Ichthyologist<br>CINVESTAV-IPN, Unidad Merida<br>Mexico                                                                     |
| Vegana, Lana<br>United States of America (the)                                                                                                                                                     | Veiga, Guida<br>Assistant Professor<br>Sports and Health Department, School of Sciences and<br>Technology, University of Évora, Portugal<br>Portugal | Vekerdy, Zoltán<br>Scientific Advisor / Assistant Professor<br>Szent István University, Gödöllő, Hungary / University of<br>Twente, Enschede, Netherlands<br>Hungary |
| VELA, Errol<br>Teacher and Researcher on Biodiversity<br>University of Montpellier<br>France                                                                                                       | Vela Diaz, Dilys M<br>PhD Student<br>Washington University in St. Louis<br>Peru                                                                      | Velasco, Julian<br>Postdoctoral researcher<br>Museo de Zoología, Facultad de Ciencias, Universidad<br>Nacional Autónoma de México<br>Mexico                          |

|                                                                                                                                          |                                                                                                                                                              |                                                                                                                  |
|------------------------------------------------------------------------------------------------------------------------------------------|--------------------------------------------------------------------------------------------------------------------------------------------------------------|------------------------------------------------------------------------------------------------------------------|
| Velasco Ayuso, Sergio<br>Microbial ecology<br>Universidad de Buenos Aires<br>Argentina                                                   | Velasque, Mariana<br>OIST<br>Japan                                                                                                                           | Velasquez, Imelda<br>Marine Chemist<br>New Zealand                                                               |
| Velazco, Paul<br>Postdoctoral Researcher<br>American Museum of Natural History<br>United States of America (the)                         | Velazco-Domínguez, Aileen T.<br>Marine Biologist -Retired<br>Puerto Rico Department of Natural and Environmental<br>Resources<br>Puerto Rico                 | Velazquez, David<br>Postdoctoral researcher<br>Universidad Autonoma de Madrid<br>Spain                           |
| Veldhuis, Djuke<br>Research Fellow<br>Aarhus University<br>Denmark                                                                       | Veldhuis, Michiel<br>Postdoc Ecosystem ecology<br>University of Groningen<br>Netherlands (the)                                                               | Veldman, Robert<br>PhD Student<br>Wageningen University & Research<br>Netherlands (the)                          |
| Velevski, Metodija<br>Curator, Ornithology<br>Macedonian Museum of Natural Sciences<br>Macedonia, Republic of (the former Yugoslavia)    | Velez, Leandro Martin<br>Dr. in Biological Sciences, PostDoctoral Student<br>Instituto Argentino de Investigaciones de Zonas Áridas<br>(IADIZA)<br>Argentina | Vélot, Christian<br>Molecular geneticist<br>University Paris-Sud<br>France                                       |
| Velten, Lars<br>Research Staff Scientist, Genomics<br>EMBL<br>Germany                                                                    | Velthuis, Mandy<br>Ecologist<br>Netherlands Institute of Ecology (NIOO-KNAW)<br>Netherlands (the)                                                            | Velusamy, Saravana Kumar<br>Scientist - B<br>National Institute of Epidemiology<br>India                         |
| Vencl, Fredric<br>Research Associate Professor<br>Stony Brook University<br>United States of America (the)                               | Vendeth Scavassa, Anelize<br>Technician at Fauna Management at airport and Biologist<br>Brazil                                                               | Vendetti, Jann<br>Malacologist<br>Natural History Museum of Los Angeles County<br>United States of America (the) |
| Vendramel, Rafaela Lumi *<br>MSc<br>Museu de Zoologia da Universidade de São Paulo<br>Brazil                                             | Vendrametto Granzotti, Rafaela<br>Brazil                                                                                                                     | Vendramini, Bianca<br>Master in Ecology<br>University of São Paulo<br>Brazil                                     |
| Vendramini, Vanessa<br>Professor/Developmental Biology<br>Unifesp<br>Brazil                                                              | Vendruscolo, Daniel<br>Mathematician<br>Universidade Federal de São Carlos<br>Brazil                                                                         | Veneros, Jaris<br>Researcher<br>National Agrarian University La Molina<br>Peru                                   |
| Venerus, Leonardo<br>Researcher (Biologist)<br>CESIMAR Centro para el Estudio de Sistemas Marinos<br>(CCT CONICET - CENPAT)<br>Argentina | Venkiteswaran, Jason<br>Assistant Professor<br>Wilfrid Laurier University<br>Canada                                                                          | Venn, Susanna<br>Plant Ecologist<br>Australian National University<br>Australia                                  |

|                                                                                                                                                     |                                                                                                                                          |                                                                                                                                           |
|-----------------------------------------------------------------------------------------------------------------------------------------------------|------------------------------------------------------------------------------------------------------------------------------------------|-------------------------------------------------------------------------------------------------------------------------------------------|
| Venter, Arthurita<br>Botany<br>North-west University Potchefstroom<br>South Africa                                                                  | Venter, Eduard<br>Lecturer - Plant Biotechnology<br>University of Johannesburg<br>South Africa                                           | Venter, Fanie<br>Plant Systematist & Vegetation Scientist<br>Australian Tropical Herbarium<br>Australia                                   |
| Venter, Kirsty<br>Education Manager<br>SST<br>South Africa                                                                                          | Venter, Oscar<br>Associate Professor<br>University of Northern British Columbia<br>Canada                                                | Venter, Stephanus<br>Professor in Microbiology<br>University of Pretoria<br>South Africa                                                  |
| Venticinque, Eduardo<br>Professor in Ecology<br>Rio Grande do Norte Federal University<br>Brazil                                                    | Ventre, Agustina<br>PhD in Ecology<br>Spain                                                                                              | Venturi, Giorgia<br>Student<br>University of Parma<br>Italy                                                                               |
| Venturi, Giorgio<br>Assistant Professor<br>Unicamp<br>Brazil                                                                                        | Venturi, Margherita<br>professor of Chemistry<br>University of Bologna - Department of Chemistry "G.<br>Ciamician"<br>Italy              | Venturini, Giada<br>PhD student in Energy System Analysis<br>Technical University of Denmark<br>Denmark                                   |
| Venturini, Natalia<br>Associate Professor of Laboratory of Marine<br>Biogeochemistry<br>Faculty of Sciencies, University of the Republic<br>Uruguay | Venturini Sobroza, Tainara<br>Instituto Nacional de Pesquisas da Amazônia<br>Brazil                                                      | Vera, Fernando<br>EdD, Soft skills for sustainable education<br>Aconcagua University<br>Chile                                             |
| VERA, VICTOR<br>Professor of ecology<br>National University of Asuncion<br>Paraguay                                                                 | Vera-Cortez, Marilina<br>Postdoctoral researcher<br>Consejo Nacional de Investigaciones Científicas y<br>Técnicas (CONICET)<br>Argentina | Veras, Mariana *<br>Senior Research Scientist<br>School of Medicine University of Sao Paulo<br>Brazil                                     |
| Verbeeck, Hans<br>Professor, applied vegetation ecology<br>Ghent University<br>Belgium                                                              | Verberk, Wilco<br>Assistant Professor in Ecology and Physiology<br>Radboud University<br>Netherlands (the)                               | Verbeylen, Goedele<br>scientific attaché<br>Natuurpunt Studie<br>Belgium                                                                  |
| Verbruggen, Erik<br>Microbial Ecologist<br>University of Antwerp<br>Belgium                                                                         | Verburg, Peter<br>Professor Environmental Geography<br>VU University Amsterdam<br>Netherlands (the)                                      | VERCHOT, LOUIS<br>Research Director, Soils and Landscapes for Sustainability<br>International Center for Tropical Agriculture<br>Colombia |
| Verdade, Luciano<br>Associate Professor of Applied Evolutionary Ecology<br>University of Sao Paulo<br>Brazil                                        | Verdade, Vanessa<br>Professor / Biology Sciences<br>Federal University of ABC<br>Brazil                                                  | Verdegem, Marc<br>Associate Professor - department of animal sciences<br>Wageningen University<br>Netherlands (the)                       |

|                                                                                                                                             |                                                                                                                                                          |                                                                                                                                |
|---------------------------------------------------------------------------------------------------------------------------------------------|----------------------------------------------------------------------------------------------------------------------------------------------------------|--------------------------------------------------------------------------------------------------------------------------------|
| Verdeny Vilalta, Oriol<br>Chargée de recherche – Ecology, data scientist<br>Ynsect<br>France                                                | Verdonschot, Piet<br>Professor Wetland Restoration Ecology<br>University of Amsterdam (IBED) & Wageningen<br>Environmental Research<br>Netherlands (the) | Verfaillie, Catherine *<br>Professor<br>Kuleuven, Belgium<br>Belgium                                                           |
| Vergara, Walter<br>Senior Fellow<br>World Resources Institute<br>United States of America (the)                                             | Vergely-Vandriessse, Catherine<br>Professor of Physiology<br>University of Burgundy<br>France                                                            | Verger, Alexis<br>Biologist<br>CNRS<br>France                                                                                  |
| Verger, Eric O.<br>Research Fellow in Nutritional Epidemiology<br>NUTRIPASS, IRD, Université Montpellier, SupAgro,<br>Montpellier<br>France | Vergobbi, Clare<br>Grad Student, Ecology<br>University of Montana<br>United States of America (the)                                                      | Verheijen, Hendricus<br>PhD student<br>Ekologi, miljö och geovetenskap. Umeå Universitet<br>Sweden                             |
| Verhey, Steve<br>Botany and Plant Pathology<br>Cascadia Carbon Institute<br>United States of America (the)                                  | VERHEYEN, Erik<br>Researcher - Biologist<br>ROYAL BELGIAN INSTITUTE OF NATURAL SCIENCES<br>Belgium                                                       | Verheyen, Kris<br>Full Professor Forest Ecology and Management<br>Ghent University<br>Belgium                                  |
| Verhille, Christine<br>Assistant Professor<br>Montana State University<br>United States of America (the)                                    | Verhoeven, Koen<br>senior scientist<br>Netherlands Institute of Ecology (NIOO-KNAW)<br>Netherlands (the)                                                 | Verhulst, Eveline<br>Assistant professor<br>Laboratory of Entomology, Wageningen University &<br>Research<br>Netherlands (the) |
| Verissimo, Ana<br>Post doc researcher<br>CIBIO - U.P.<br>Portugal                                                                           | Verk, Natasa<br>Teaching assistant/Marketing<br>University of Ljubljana, Faculty of Social Sciences<br>Slovenia                                          | Verkuil, Yvonne<br>Ecologist<br>Conservation Ecology Group, University of Groningen<br>Netherlands (the)                       |
| Verlynde, Simon<br>Research-Associate<br>France                                                                                             | Vermandele, Fanny<br>MSc student<br>Université du Québec à Rimouski<br>Canada                                                                            | Vermeersch, Pierre<br>Professor emeritus Earth sciences<br>Katholieke Universiteit Leuven<br>Belgium                           |
| Vermeij, Mark<br>Coral reef ecology<br>Carmabi Foundation/ University of Amsterdam<br>Curaçao                                               | Vermeir, Koen<br>Research Professor, Science Studies<br>French National Research Centre<br>France                                                        | Vermeiren, Charlotte<br>PhD student - soil and environmental chemistry<br>KU Leuven<br>Belgium                                 |
| Vermeiren, Peter<br>Postdoctoral Researcher in Ecology<br>EAWAG<br>Switzerland                                                              | Vermunt, Mardie<br>Utrecht University<br>Netherlands (the)                                                                                               | Veronese, Cosetta<br>Humanities (English and Italian literature)<br>Switzerland                                                |

|                                                                                                                                                          |                                                                                                               |                                                                                                            |
|----------------------------------------------------------------------------------------------------------------------------------------------------------|---------------------------------------------------------------------------------------------------------------|------------------------------------------------------------------------------------------------------------|
| Verschuuren, Jonathan<br>International and European Environmental law<br>Tilburg University<br>Netherlands (the)                                         | Versieux, Leonardo<br>Professor of Botany<br>Univ. Federal do Rio Grande do Norte<br>Brazil                   | Versluys, Maxime<br>PhD<br>KU Leuven<br>Belgium                                                            |
| Versteegh, Gerard<br>Senior Scientist, Environment of the Past<br>Alfred-Wegener-Institut Helmholtz-Zentrum für Polar-<br>und Meeresforschung<br>Germany | Verstrepen, Babs E<br>Scientist<br>Biomedical Primate Research Centre<br>Netherlands (the)                    | Vertigan, Caitlin<br>Environment & Research<br>Port Arthur Historic Site Management Authority<br>Australia |
| Verweij, Pita<br>Assistant professor in Ecology<br>Utrecht University, Copernicus Institute of Sustainable<br>Development<br>Netherlands (the)           | Verwer, Caspar<br>ecologist<br>IUCN Netherlands Committee<br>Netherlands (the)                                | Verzijden, Machteld<br>Postdoc, Behavioural Ecology<br>Aarhus University<br>Denmark                        |
| Vesga, Pilar<br>PhD Student<br>Eidgenössische Technische Hochschule Zürich (ETHZ)<br>Switzerland                                                         | Vessaz, Fanny<br>Marine Biology<br>Blue Ventures<br>Comoros (the)                                             | Vesterinen, Jussi<br>Post-doctoral researcher<br>Finland                                                   |
| Vet, Louise<br>Director NIOO-KNAW and Professor in Ecology<br>Wageningen University<br>Netherlands Institute of Ecology (NIOO-KNAW)<br>Netherlands (the) | Vetrone, Fiorenzo<br>Professor<br>INRS, Université du Québec<br>Canada                                        | Vetter, Vanessa M.S.<br>PhD student in Disturbance Ecology<br>University of Bayreuth<br>Germany            |
| Veum, Scott<br>PhD Student<br>North Dakota State University<br>United States of America (the)                                                            | Vézina, Nicole<br>Professeure titulaire / Ergonomie<br>Université du Québec à Montréal<br>Canada              | VEZINET, Didier<br>France                                                                                  |
| Vial, Laurence<br>Researcher<br>CIRAD<br>France                                                                                                          | Viana, Blandina<br>Full Professor<br>Federal University of Bahia<br>Brazil                                    | Viana, Pedro<br>Researcher in Plant Systematics<br>Museu Paraense Emílio Goeldi<br>Brazil                  |
| Viane, Ronnie<br>PhD Botany<br>Ghent University<br>Belgium                                                                                               | Viblanç, Vincent A<br>Researcher. Ecophysiology/Behavioural Ecology<br>CNRS<br>France                         | Vicca, Sara<br>Postdoctoral researcher<br>University of Antwerp<br>Belgium                                 |
| Vice, Diane<br>Supervisory Wildlife Biologist<br>Guam Agriculture<br>Guam                                                                                | Vicenci Fernandes, Sandra *<br>Professor Ecology<br>UNIJUI-Universidade Regional do Noroeste do RGS<br>Brazil | Vicencio, Sergio<br>Postdoc Neuroscience<br>Universidad de Chile<br>Chile                                  |

|                                                                                                                              |                                                                                                                                                                                         |                                                                                                                                                                                                          |
|------------------------------------------------------------------------------------------------------------------------------|-----------------------------------------------------------------------------------------------------------------------------------------------------------------------------------------|----------------------------------------------------------------------------------------------------------------------------------------------------------------------------------------------------------|
| Vicens Fornés, Magdalena<br>Curator in Soller Botanic Garden/biologist<br>Soller Botanic Garden<br>Spain                     | Vicente-Vicente, José Luis *<br>PhD Biogeochemistry<br>University of Jaén<br>Spain                                                                                                      | Vicentini, Alberto<br>Pesquisador<br>Instituto Nacional de Pesquisas da Amazônia<br>Brazil                                                                                                               |
| Vickers, Mathew<br>Post Doc<br>Australia                                                                                     | Vickery, John<br>conservation and restoration ecology; science education<br>Institute of Ecology, Univ of Georgia; Teachers College,<br>Columbia Univ<br>United States of America (the) | VICKERY, JULIET<br>HEAD OF INTERNATIONAL RESEARCH<br>RSPB CENTRE FOR CONSERVATION SCIENCE, ROYAL<br>SOCIETY FOR THE PROTECTION OF BIRDS<br>United Kingdom of Great Britain and Northern Ireland<br>(the) |
| Vick-Majors, Trista<br>Postdoctoral Research Fellow<br>University of Québec, Montréal<br>Canada                              | Vicknair, Wren<br>Graduate Student<br>Southeastern Louisiana University<br>United States of America (the)                                                                               | Vickneswaran, Mathavan<br>MSc Student, Conservation Biology<br>Institute for Tropical Biology and Conservation<br>Malaysia                                                                               |
| Victória Irume, Mariana<br>PhD student in Botany<br>National Institute of Amazonian Research<br>Brazil                       | Victoria-Salazar, Isael<br>Ph.D. student<br>Universidad Nacional Autónoma de México, Facultad de<br>Ciencias<br>Mexico                                                                  | Vidal, Eric<br>Director of Research<br>IRD Research Institute for Development<br>New Caledonia                                                                                                           |
| Vidal-Abarca, Maria Rosario<br>Professor of Ecology<br>University of Murcia<br>Spain                                         | Vidaurre, Elizabeth<br>Visiting Assistant Professor in Mathematics Department<br>University of Rochester<br>United States of America (the)                                              | Videvall, Elin<br>Biology<br>Lund University<br>Sweden                                                                                                                                                   |
| Vié, Jean-Christophe<br>IUCN<br>Switzerland                                                                                  | Viegas, Ivan<br>Portugal                                                                                                                                                                | Vieilledent, Ghislain<br>Researcher in ecology<br>Cirad<br>France                                                                                                                                        |
| Vieira, Emerson<br>Associate Professor<br>Universidade de Brasilia<br>Brazil                                                 | Vieira, Ima Célia G.<br>Senior Research - Evology and Environmental Science<br>Museu Paraense Emilio Goeldi<br>Brazil                                                                   | Vieira, Joana<br>Post-Doctoral Researcher<br>Centre for Functional Ecology, University of Coimbra<br>Portugal                                                                                            |
| Vieira, Leandro Manzoni<br>Professor of Zoology<br>Departamento de Zoologia, Universidade Federal de<br>Pernambuco<br>Brazil | Vieira, Marcus<br>Associate Professor<br>Dept. Ecologia, Instituto de Biologia, Universidade<br>Federal do Rio de Janeiro<br>Brazil                                                     | Vieira, Rui Pedro<br>PhD candidate<br>University of Southampton<br>United Kingdom of Great Britain and Northern Ireland<br>(the)                                                                         |
| Vieira, Simone<br>Researcher in Ecosystem Ecology<br>NEPAM/UNICAMP<br>Brazil                                                 | Vieira, Willian<br>PhD Candidate<br>Université de Sherbrooke<br>Canada                                                                                                                  | Vieira Aramuni, Filipe<br>Master's degree student<br>INPA<br>Brazil                                                                                                                                      |

|                                                                                                                     |                                                                                                                                                                         |                                                                                                                         |
|---------------------------------------------------------------------------------------------------------------------|-------------------------------------------------------------------------------------------------------------------------------------------------------------------------|-------------------------------------------------------------------------------------------------------------------------|
| Vieira Rossi, Rogerio<br>Professor<br>Universidade Federal de Mato Grosso<br>Brazil                                 | Vieitez Manrique, Cristina<br>Postdoctoral Researcher<br>European Molecular Biology Laboratory (EMBL)<br>Germany                                                        | Viejo, José Luis<br>Professor of Zoology<br>Dep. de Biología, Universidad Autónoma de Madrid<br>Spain                   |
| Viera, Alberto<br>Associate Professor of Cell Biology<br>Universidad Autónoma de Madrid<br>Spain                    | Vierling, Elizabeth<br>Professor of Biochemistry<br>University of Massachusetts Amherst<br>United States of America (the)                                               | Viesca G, Michele<br>Economist<br>Mexico                                                                                |
| Vighi, Marco<br>Professor - Senior Scientist - Ecotoxicology<br>IMDEA Water Institute<br>Spain                      | VIGIL, Jose Maria<br>Latin American Theological Commission Coordinator<br>EATWOT, Ecumenical Association of Third World<br>Theologians<br>Panama                        | Viglino, Mariana<br>Argentina                                                                                           |
| Vignieri, Sacha<br>Senior Editor<br>Science<br>United States of America (the)                                       | VIGNON, Matthias<br>Assistant Professor<br>University Pau & Pays Adour / INRA<br>France                                                                                 | Vijayasimha, Kartikeya<br>PhD candidate, molecular biology<br>Oregon State University<br>United States of America (the) |
| Vijver, Martina<br>Associate prof, ecotoxicology<br>Leiden University<br>Netherlands (the)                          | VILA, BRYAN<br>Professor Emeritus<br>Washington State University<br>United States of America (the)                                                                      | Vilà, Carles<br>Research Scientist, Natural Resources<br>Spanish National Research Council<br>Spain                     |
| Vila Farré, Miquel<br>Post-doc<br>Max Planck Institute of Molecular Cell Biology and<br>Genetics<br>Germany         | Vila_Reig, Magda<br>Associate Researcher<br>Institut de Ciències del Mar (CSIC)<br>Spain                                                                                | Vilagrosa, Alberto<br>Researcher<br>Dept. Ecology, Univ Alicante<br>Spain                                               |
| Vilani, Rodrigo<br>Assistant Professor / Environmental law<br>University of Rio de Janeiro (UNIRIO)<br>Brazil       | Vilanova, Emilio<br>PhD Candidate / Assistant Professor<br>University of Washington, USA / Universidad de Los<br>Andes, Venezuela<br>Venezuela (Bolivarian Republic of) | Vilar, Ciro<br>Post-doc<br>Universidade Federal do Espírito Santo<br>Brazil                                             |
| VILAR PONS, jose angel *<br>architect<br>Brazil                                                                     | Vilasboa, Anderson<br>Conservation Genetics<br>Universidade do Estado do Rio de Janeiro<br>Brazil                                                                       | Vilegas, Wagner<br>Full Professor<br>Unesp, São Paulo State University<br>Brazil                                        |
| Vilela, Bruno<br>Postdoctoral Researcher in Ecology and Evolution<br>Washington University in Saint Louis<br>Brazil | Vilela, Carlos Ribeiro<br>Assistant Professor of Genetics<br>Universidade de São Paulo<br>Brazil                                                                        | Villa Navarro, Francisco Antonio<br>Professor Ph.D.<br>Universidad del Tolima<br>Colombia                               |

|                                                                                                                          |                                                                                                                                                                                       |                                                                                                                                              |
|--------------------------------------------------------------------------------------------------------------------------|---------------------------------------------------------------------------------------------------------------------------------------------------------------------------------------|----------------------------------------------------------------------------------------------------------------------------------------------|
| VILLACA, ROBERTO<br>Professor Titular - Marine Botany<br>Universidade Federal Fluminense<br>Brazil                       | Villagra Gil, Cristian Alfonso<br>Associate Professor/Plant-Insect Interactions<br>Instituto de Entomología, Universidad Metropolitana de<br>Ciencias de la Educación<br>Chile        | Villalba, Lilian<br>Biologist<br>Andean Cat Alliance<br>Bolivia (Plurinational State of)                                                     |
| Villalobos, Fabricio<br>Researcher/Macroecology<br>Instituto de Ecología, A.C. (INECOL)<br>Mexico                        | Villalobos-Barrantes, Heidy<br>Instructor/Chemistry and Molecular Biology and<br>Systematics<br>University of Costa Rica<br>Costa Rica                                                | Villalta, Irene<br>Postdoctoral researcher<br>Doñana Biological Station-CSIC<br>Spain                                                        |
| Villar, Nacho<br>Postdoctoral Fellow<br>UNESP Rio Claro<br>Brazil                                                        | Villar Argáiz, Manuel *<br>Professor<br>Granada University<br>Spain                                                                                                                   | Villasante, Sebastian<br>Professor and Researcher in Economics - Marine<br>ecosystems<br>University Santiago de Compostela<br>Spain          |
| Villatoro, Federico J.<br>Graduate Veterinary School Professor<br>Universidad de San Carlos de Guatemala<br>Guatemala    | Villaverde, Jaime<br>Senior researcher<br>CSIC<br>Spain                                                                                                                               | Villegas, Juan Camilo<br>Associate Professor<br>Universidad de Antioquia<br>Colombia                                                         |
| Villegas, Mariana<br>Associate Researcher / Avian Ecologist<br>Instituto de Ecología<br>Bolivia (Plurinational State of) | Villegas-Montes, Martha<br>General Research Support Bioscience Technician /<br>Biologist<br>University of Roehampton<br>United Kingdom of Great Britain and Northern Ireland<br>(the) | Villela, Dora M.<br>Lecturer / Plant Ecology - Carbon Dynamics in tropical<br>forests<br>State University of Rio de Janeiro (UENF)<br>Brazil |
| Villellas, Jesus<br>Postdoctoral Researcher in Ecology<br>Trinity College Dublin<br>Ireland                              | Villén-Pérez, Sara<br>Postdoctoral researcher in ecology<br>Universidade Federal de Goiás<br>Brazil                                                                                   | Villero, Dani<br>PhD in Biodiversity and Landscape Ecology<br>Forest Sciences Centre of Catalonia<br>Spain                                   |
| Villet, Martin<br>Professor, Biology<br>Rhodes University<br>South Africa                                                | Villette, Sandrine<br>Biophysics<br>CNRS<br>France                                                                                                                                    | Vilmi, Annika<br>Researcher<br>Finnish Environment Institute<br>Finland                                                                      |
| VILTE, Richard<br>CHEMICAL ENGINEER<br>INRA<br>France                                                                    | Vilugron, Jonnathan<br>Ms Cs biólogo marino<br>Chile                                                                                                                                  | Vimercati, Giovanni<br>Post Doctoral Fellow, Invasion Ecology and Evolutionary<br>Biology<br>University of Angers<br>France                  |



|                                                                                                                    |                                                                                                                                         |                                                                                                                                                                             |
|--------------------------------------------------------------------------------------------------------------------|-----------------------------------------------------------------------------------------------------------------------------------------|-----------------------------------------------------------------------------------------------------------------------------------------------------------------------------|
| Vina, Luis<br>Full professor Condensed Matter Physics<br>Universidad Autonoma de Madrid<br>Spain                   | Vinas, Jordi<br>Universitat de Girona<br>Spain                                                                                          | Vincenot, Christian<br>Assistant Professor in Ecology/Informatics<br>Kyoto University<br>Japan                                                                              |
| Vincent, Flora *<br>PhD<br>IBENS<br>France                                                                         | Vincent, Michael<br>Botanist<br>Miami University<br>United States of America (the)                                                      | Vinck, Anne-Marie<br>Chemist<br>education<br>Belgium                                                                                                                        |
| Vincke, Caroline<br>Professor in forest ecology and wood technology<br>Université catholique de Louvain<br>Belgium | Vincnt, Gregoire<br>Researcher Forest cology<br>IRD<br>France                                                                           | Vine, Edward<br>Ecologist<br>Retired<br>United States of America (the)                                                                                                      |
| Viñegla, Benjamin<br>Professor, Ecology<br>University of Jaén<br>Spain                                             | Viñegla, Fernando<br>Ecological Restorer<br>International Foundation of Ecological Restoration<br>Spain                                 | Vinette Herrin, Kimberly<br>Zoo vet<br>Taronga Zoo<br>Australia                                                                                                             |
| Vining, Sarah Rose<br>Graduate Student<br>University of Alaska Fairbanks<br>United States of America (the)         | Vinje, Jessie<br>Botanist<br>Conservation Biology Institute<br>United States of America (the)                                           | Vinyoles, Dolors<br>Lecturer<br>Department of Evolutionary Biology, Ecology and<br>Environmental Sciences. Faculty of Biology. University of<br>Barcelona. Spain .<br>Spain |
| Vinyoles, Jordi<br>Hidrogeologist<br>Spain                                                                         | Vinyoles Cartanyà, Jordi<br>Hidrogeologist<br>Spain                                                                                     | Viola, Eduardo *<br>Full Professor of International Relations<br>University of Brasilia<br>Brazil                                                                           |
| Viola, Jannis<br>Environmental Geography<br>Germany                                                                | Viot, Christopher<br>Scientific Researcher<br>CIRAD<br>France                                                                           | Virji, Hassan<br>Professor/climatology and global change<br>University of Maryland; START International, Inc.<br>United States of America (the)                             |
| Virkkala, Raimo<br>Leading Researcher, PhD<br>Finnish Environment Institute<br>Finland                             | Virtanen, Risto<br>Senior Curator<br>University of Oulu<br>Finland                                                                      | vis, Charlotte<br>Canada                                                                                                                                                    |
| Vis, Morgan<br>Professor<br>Ohio University<br>United States of America (the)                                      | Visakorpi, Kristiina<br>PhD student in Zoology<br>University of Oxford<br>United Kingdom of Great Britain and Northern Ireland<br>(the) | Visconti, Maria Aparecida<br>Associate Professor<br>Instituto de Biociências, Universidade de São Paulo<br>Brazil                                                           |

|                                                                                                                                                                     |                                                                                                                                                                      |                                                                                                                                                           |
|---------------------------------------------------------------------------------------------------------------------------------------------------------------------|----------------------------------------------------------------------------------------------------------------------------------------------------------------------|-----------------------------------------------------------------------------------------------------------------------------------------------------------|
| <p>Visconti, Piero<br/>Research fellow<br/>University College London<br/>United Kingdom of Great Britain and Northern Ireland (the)</p>                             | <p>Visick, Jonathan<br/>Professor of Biology<br/>North Central College<br/>United States of America (the)</p>                                                        | <p>Visintin, Francesca<br/>Chair<br/>eFrame ltd<br/>Italy</p>                                                                                             |
| <p>Vissault, Steve<br/>Professional researcher<br/>Université de Sherbooke<br/>Canada</p>                                                                           | <p>Vital, Alberto *<br/>Writer and scholar in Literature Studies<br/>UNAM<br/>Mexico</p>                                                                             | <p>Vital, Helenice<br/>Full Professor Marine Geology<br/>Universidade Federal do Rio Grande do Norte<br/>Brazil</p>                                       |
| <p>Vitek, Ernst<br/>Director of Department of Botany<br/>Naturhistorisches Museum Wien<br/>Austria</p>                                                              | <p>Vitiello, Peter<br/>Assistant Scientist (Biomedical research)<br/>Sanford Research<br/>United States of America (the)</p>                                         | <p>Vitikainen, Emma<br/>Ecology and Evolution<br/>University of Helsinki<br/>Finland</p>                                                                  |
| <p>Vitorino Jr., Oscar<br/>Biologist<br/>Instituto Natureza do Tocantins - NATURATINS<br/>Brazil</p>                                                                | <p>VITULE, JEAN<br/>Professor of Ecology and Conservation<br/>Federal University of Parana<br/>Brazil</p>                                                            | <p>Vivas, Maria<br/>Post doctoral fellow<br/>Forestry and Agricultural Biotechnology Institute<br/>South Africa</p>                                       |
| <p>Vives Rego, José<br/>Honorific Professor<br/>University of Barcelona<br/>Spain</p>                                                                               | <p>Vives-Ingla, Maria<br/>Ecologist<br/>CREAF<br/>Spain</p>                                                                                                          | <p>Viviani, Jérémie<br/>PhD student in Biology<br/>Institut de Génomique Fonctionnelle de Lyon<br/>France</p>                                             |
| <p>Vizcaino, Juan Antonio<br/>Bioinformatics<br/>EMBL-EBI<br/>United Kingdom of Great Britain and Northern Ireland (the)</p>                                        | <p>Vizcaino Palomar, Natalia<br/>PostDoctoral Researcher<br/>UMR BioGeCo INRA-Bordeaux I<br/>France</p>                                                              | <p>Vizentin-Bugoni, Jeferson<br/>Postdoctoral Researcher in Ecology<br/>University of Illinois at Urbana-Champaign<br/>United States of America (the)</p> |
| <p>Vizzini, Alfredo<br/>Department of Life Sciences and Systems Biology,<br/>University of Torino, Viale P.A. Mattioli 25, I-10125,<br/>Torino, Italy<br/>Italy</p> | <p>Vladkova, Radka *<br/>Associate Professor, Biophysics<br/>Institute of Biophysics and Biomedical Engineering -<br/>Bulgarian Academy of Sciences<br/>Bulgaria</p> | <p>Vlaeminck, Kristof<br/>Head of Brussels Office<br/>University of Bergen<br/>Norway</p>                                                                 |
| <p>Vlasiuk, Anastasiia<br/>Predoctoral Fellow / Computational Neuroscience<br/>European Molecular Biology Laboratory, Rome<br/>Ukraine</p>                          | <p>Vleck, Carol<br/>Professor of Biology, Emeritus<br/>Iowa State University<br/>United States of America (the)</p>                                                  | <p>Vleck, PhD, RBP, Susan<br/>Senior Biosafety &amp; Biosecurity Specialist<br/>Stanford University<br/>United States of America (the)</p>                |
| <p>Vlek, Paul<br/>Professor Emeritus<br/>Center for Development Research, University of Bonn<br/>Germany</p>                                                        | <p>Vochten, Tim<br/>Conservation biologist<br/>Natuurpunt Antwerpen Noord<br/>Belgium</p>                                                                            | <p>Voelker, Bettina<br/>Professor of Chemistry<br/>Colorado School of Mines<br/>United States of America (the)</p>                                        |

|                                                                                                                                                                                      |                                                                                                                                                               |                                                                                                                                                     |
|--------------------------------------------------------------------------------------------------------------------------------------------------------------------------------------|---------------------------------------------------------------------------------------------------------------------------------------------------------------|-----------------------------------------------------------------------------------------------------------------------------------------------------|
| Vogan, David<br>Professor of Mathematics<br>MIT<br>United States of America (the)                                                                                                    | Vogel Ely, Cleusa<br>PhD<br>Universidade Federal do Rio Grande do Sul<br>Brazil                                                                               | Vogiatzakis, Ioannis<br>Assoc. Professor in Environmental Conservation<br>Open University of Cyprus<br>Cyprus                                       |
| Vogler, Barbara<br>Postdoc<br>Department for Poultry and Rabbit Diseases, Institute for<br>Veterinary Bacteriology, Vetsuisse Faculty Zurich,<br>University of Zurich<br>Switzerland | Vogt, Richard C.<br>Curator of Reptiles and Amphibians<br>Instituto Nacional de Pesquisas da Amazônia<br>Brazil                                               | Voigt, Dagmar<br>PostDoc<br>TU Dresden<br>Germany                                                                                                   |
| Voigt, Holm<br>Senior Researcher/Geography<br>Center for Development Research (Uni Bonn)<br>Germany                                                                                  | VOISON, Catherine<br>Art professor<br>Université Paris 1 Pantheon/Sorbonne<br>France                                                                          | VOLAIRE, Florence<br>Researcher Ecology<br>INRA-CNRS<br>France                                                                                      |
| Volotao, Eduardo<br>Virologist Public Health Researcher<br>Oswaldo Cru Institute<br>Brazil                                                                                           | Volovitch, Michel<br>Pr emeritus, biology<br>Ecole Normale Superieure<br>France                                                                               | volta, pietro *<br>Researcher<br>National Research Council of Italy CNR<br>Italy                                                                    |
| Volto, Natacha<br>Remote sensing engineer<br>Littoral Environnement et Sociétés (LIENSs) - CNRS<br>France                                                                            | Volz González, Isabel Andrea<br>Asistente Grado 2 Laboratorio de Química Biológica<br>Ambiental<br>UdelaR- Universidad de la República<br>Uruguay             | von Balthazar, Maria<br>Botanist<br>University of Vienna<br>Austria                                                                                 |
| von Dassow, Peter<br>Associate Professor, Biological Oceanography<br>Pontificia Universidad Católica de Chile<br>Chile                                                               | von der Gathen, Peter<br>Atmospheric Physics<br>Alfred Wegener Institute, Helmholtz Centre for Polar und<br>Marine Research, Research Unit Potsdam<br>Germany | von Dewitz, Burkhard<br>Dipl. Biol., PhD Candidate, Marine Ecology<br>GEOMAR Helmholtz Zentrum für Oceanforschung Kiel<br>Germany                   |
| von Dorrien, Christian<br>Senior Scientist / Fisheries Biologist<br>Thünen Institute of Baltic Sea Fisheries<br>Germany                                                              | von Grafenstein, Ulrich<br>Senior Scientist, Palaeoclimate<br>IPSL/LSCE, France<br>Germany                                                                    | von Hardenberg, Achaz<br>Lecturer in Conservation Biology<br>University of Chester<br>United Kingdom of Great Britain and Northern Ireland<br>(the) |
| Von Hohendorff, Jean<br>Professor and Researcher/Psychology<br>IMED Passo Fundo<br>Brazil                                                                                            | Von Matter, Sandro *<br>Biodiversity Conservation Scientist & Citizen Science<br>Specialist<br>Federal Rural University of Rio de Janeiro<br>Brazil           | von Mühlen, Eduardo<br>PhD Student - Ecology<br>Federal University of Rio Grande do Norte (UFRN)<br>Brazil                                          |

|                                                                                                                                                                                                              |                                                                                                                                                                                     |                                                                                                                                                                                     |
|--------------------------------------------------------------------------------------------------------------------------------------------------------------------------------------------------------------|-------------------------------------------------------------------------------------------------------------------------------------------------------------------------------------|-------------------------------------------------------------------------------------------------------------------------------------------------------------------------------------|
| <p>von Prillwitz, Kai<br/> Scientific Assistant and PhD Student - Mathematical Modelling<br/> University of Oldenburg (Institute for Chemistry and Biology of the Marine Environment; ICBM)<br/> Germany</p> | <p>von Sachsen-Coburg und Gotha, Simon<br/> Marine Science Student<br/> Scottish Association for Marine Science<br/> United Kingdom of Great Britain and Northern Ireland (the)</p> | <p>von Schmalensee, Menja<br/> Section manager<br/> West Iceland Nature Research Centre<br/> Iceland</p>                                                                            |
| <p>Vonesch, Sibylle<br/> EMBL<br/> Germany</p>                                                                                                                                                               | <p>Vonk, Arie<br/> Assistant Professor, Freshwater and Marine Ecology<br/> Institute for Biodiversity and Ecosystem Dynamics - University of Amsterdam<br/> Netherlands (the)</p>   | <p>Vopel, Kay *<br/> Marine Biogeochemistry<br/> Auckland University of Technology<br/> New Zealand</p>                                                                             |
| <p>Vor, Torsten<br/> Forest Scientist<br/> Dept. of Silviculture and Forest Ecology, University Göttingen<br/> Germany</p>                                                                                   | <p>Vorenhout, Michel<br/> Adjunct Researcher<br/> IBED, University of Amsterdam<br/> Netherlands (the)</p>                                                                          | <p>Vorne, Virpi<br/> Researcher<br/> Natural Resources Institute Finland<br/> Finland</p>                                                                                           |
| <p>Vorrath, Maria-Elena<br/> PhD Student<br/> Alfred Wegener Institute for Polar and Marine Research<br/> Germany</p>                                                                                        | <p>Vos, Amy<br/> Master of Science (Natural Resource Management)<br/> James Cook University<br/> Australia</p>                                                                      | <p>Vos, Rutger<br/> Researcher<br/> Naturalis Biodiversity Center<br/> Netherlands (the)</p>                                                                                        |
| <p>Vos, Vincent A.<br/> MSc Biology<br/> CIPCA NA<br/> Bolivia (Plurinational State of)</p>                                                                                                                  | <p>Voskamp, Alke<br/> Postdoc<br/> Senckenberg Biodiversity and Climate Research Centre<br/> Germany</p>                                                                            | <p>Vosloo, Andre<br/> Academic Leader: Cell Biology<br/> University of KwaZulu-Natal<br/> South Africa</p>                                                                          |
| <p>Vosloo, Dalene<br/> Lecturer in Biology<br/> University of KwaZulu-Natal<br/> South Africa</p>                                                                                                            | <p>Voss, Kristofor<br/> Assistant Professor<br/> Regis University<br/> United States of America (the)</p>                                                                           | <p>Voss, Laura<br/> Psychologist, Science/Technology/Society Studies<br/> Researcher<br/> Technische Universität München, Munich Center for Technology in Society<br/> Germany</p>  |
| <p>VOUNSERBO, Emmanuel<br/> Ingenieur des Eaux et Forêts<br/> Ecole de Faune de Garoua<br/> Cameroon</p>                                                                                                     | <p>Vourc'h, Gwenaël<br/> Researcher<br/> INRA<br/> France</p>                                                                                                                       | <p>Vowles, Andrew<br/> Research Fellow in Ecohydraulics and Fisheries Management<br/> University of Southampton<br/> United Kingdom of Great Britain and Northern Ireland (the)</p> |

|                                                                                                                                                       |                                                                                                               |                                                                                                                                          |
|-------------------------------------------------------------------------------------------------------------------------------------------------------|---------------------------------------------------------------------------------------------------------------|------------------------------------------------------------------------------------------------------------------------------------------|
| Vowles, Tage<br>Researcher in Ecology<br>Department of Earth Sciences, University of Gothenburg<br>Sweden                                             | Voyles, Jamie<br>Assistant Professor, Ecology<br>University of Nevada, Reno<br>United States of America (the) | Voysey, Michael<br>MSc Student<br>University of Pretoria<br>South Africa                                                                 |
| Vrain, Thierry<br>Research scientist (retired)<br>Canadian department of Agriculture<br>Canada                                                        | Vranckx, Guy<br>Postdoc/teacher<br>KULeuven/SMIK<br>Belgium                                                   | Vrieling, Harry *<br>Associate professor Human Genetics<br>LUMC<br>Netherlands (the)                                                     |
| Vriend, Stefan<br>PhD candidate in ecology and evolutionary biology<br>Norwegian University of Science and Technology (NTNU)<br>Norway                | VRIZ, Sophie<br>Professor<br>University Paris Diderot<br>France                                               | Vromans, Michiel<br>MSc Sustainable Energy<br>Netherlands (the)                                                                          |
| Vrugtman, Freek<br>Curator Emeritus<br>Royal Botanical Gardens<br>Canada                                                                              | Vu, Jannet<br>Graduate Student<br>Stony Brook University<br>United States of America (the)                    | Vuillaume, Barbara<br>PhD student in Ecology<br>Université Laval<br>Canada                                                               |
| Vulinec, Kevina<br>Professor of Wildlife Ecology<br>Delaware State University<br>United States of America (the)                                       | vvl, alekhya *<br>Researcher<br>National remote sensing centre<br>India                                       | Vynne, Megan<br>Kauai Endangered Seabird Recovery Project Field Crew<br>Leader<br>University of Hawaii<br>United States of America (the) |
| Waardenberg, Ashley<br>Postdoctoral Fellow<br>European Molecular Biology Laboratory<br>Germany                                                        | Wackernagel, Mathis<br>CEO<br>Global Footprint Network<br>United States of America (the)                      | Wadhams, Peter<br>Professor of Ocean Physics<br>University of Cambridge<br>United Kingdom of Great Britain and Northern Ireland<br>(the) |
| Wadia, Spenta<br>Professor of Physics<br>International Centre for Theoretical Sciences, Tata<br>Institute of Fundamental Reserach, Bangalore<br>India | Wadia, Varun<br>Graduate Student<br>Caltech<br>United States of America (the)                                 | Waeber, Patrick O.<br>Senior Scientist<br>ETH Zurich<br>Switzerland                                                                      |
| waelbroeck, claire<br>Full time Research Scientist - paleoclimatology<br>CNRS<br>France                                                               | Wærsted, Eivind<br>PhD student Meteorology<br>École Polytechnique<br>France                                   | Wagner, Beate<br>Lecturer<br>Institut für Politikwissenschaft, Universität Halle-<br>Wittenberg<br>Germany                               |

|                                                                                                                                              |                                                                                                                                                                |                                                                                                                                                                                                                           |
|----------------------------------------------------------------------------------------------------------------------------------------------|----------------------------------------------------------------------------------------------------------------------------------------------------------------|---------------------------------------------------------------------------------------------------------------------------------------------------------------------------------------------------------------------------|
| Wagner, Eric<br>Biology<br>University of Washington<br>United States of America (the)                                                        | Wagner-Riddle, Claudia<br>Professor, Environmental Science<br>University of Guelph<br>Canada                                                                   | Wagstaff, Matthew<br>Masters of Science Student<br>University of British Columbia<br>Canada                                                                                                                               |
| Wahlberg, Niklas<br>Professor<br>Lund University<br>Sweden                                                                                   | Wahren, Henrik<br>Cold climate ecosystems<br>Research Centre for Applied Alpine Ecology, La Trobe<br>University<br>Australia                                   | waila, pranav *<br>Senior Data Scientist<br>waila<br>India                                                                                                                                                                |
| WAINWRIGHT, JOEL<br>Professor, Geography<br>Ohio State University<br>United States of America (the)                                          | Wainwright, Stephen<br>Retired Senior lecturer in Environmental Biology<br>Swansea University<br>United Kingdom of Great Britain and Northern Ireland<br>(the) | Wakes, Sarah<br>Modeller<br>New Zealand                                                                                                                                                                                   |
| Walczak, Aleksandra<br>CNRS researcher<br>CNRS<br>France                                                                                     | Walczynska, Aleksandra<br>researcher - ecology<br>Institute of Environmental Sciences, Jagiellonian<br>University<br>Poland                                    | Waldner, François<br>Researcher<br>Université catholique de Louvain<br>Belgium                                                                                                                                            |
| Waldorf, Elizabeth<br>College Instructor<br>Mississippi Gulf Coast Community College, Jeff Davis<br>Campus<br>United States of America (the) | WALDRON, SUSAN<br>Professor of Biogeochemistry<br>University of Glasgow<br>United Kingdom of Great Britain and Northern Ireland<br>(the)                       | Walentowski, Helge<br>Professor for Pedology, Geobotany and Nature<br>Conservation<br>Hochschule für angewandte Wissenschaft und Kunst -<br>Hildesheim/Holzminde n/Göttingen Faculty of Resource<br>Management<br>Germany |
| Walerud, Caroline<br>Biology and tech entrepreneurship<br>Sweden                                                                             | Walkden, Niall<br>PhD Student- Ecologist<br>University of Brighton<br>United Kingdom of Great Britain and Northern Ireland<br>(the)                            | Walker, Brian<br>Research Scientist<br>Nova SE University<br>United States of America (the)                                                                                                                               |
| Walker, David<br>Biologist<br>Member of the Royal Society of Biology<br>United Kingdom of Great Britain and Northern Ireland<br>(the)        | Walker, Elsbeth<br>Professor of Biology<br>University of Massachusetts, Amherst<br>United States of America (the)                                              | Walker, Glen<br>Lecturer/Researcher Animal Nutrition<br>James Cook University<br>Australia                                                                                                                                |
| walker, grazia<br>retired biology instructor<br>University of Maryland<br>United States of America (the)                                     | Walker, Joseph<br>University of Georgia<br>United States of America (the)                                                                                      | Walker, Lawrence<br>Professor of Ecology<br>University of Nevada Las Vegas<br>United States of America (the)                                                                                                              |

|                                                                                                                                                        |                                                                                                                                                                    |                                                                                                                      |
|--------------------------------------------------------------------------------------------------------------------------------------------------------|--------------------------------------------------------------------------------------------------------------------------------------------------------------------|----------------------------------------------------------------------------------------------------------------------|
| Walker, Lexie<br>aquatic invertebrate biologist<br>Independent scientist<br>Australia                                                                  | Walker, Marilyn<br>Ecosystems<br>HOMER Energy<br>United States of America (the)                                                                                    | Walker, Robert<br>Professor of Medicine<br>University of Otago<br>New Zealand                                        |
| Walker, Taylor<br>Herbarium Collections<br>New York Botanical Garden<br>United States of America (the)                                                 | Walker, Travis<br>Student Affairs Manager<br>The School for Field Studies<br>Costa Rica                                                                            | Walkington, Matt<br>Marine Physics<br>National Institute of Water and Atmospheric Research<br>Limited<br>New Zealand |
| Wall, Bonnie<br>Doctoral Candidate<br>University of Melbourne<br>Australia                                                                             | Wall, David<br>PhD (Geography)<br>Reading University<br>United Kingdom of Great Britain and Northern Ireland<br>(the)                                              | Wallace, Richard<br>Professor of Environmental Studies<br>Ursinus College<br>United States of America (the)          |
| Wallace, William<br>Physicist<br>Griffith University<br>Australia                                                                                      | Wallach, Arian<br>Chancellor's Postdoctoral Research Fellow<br>Center for Compassionate Conservation University of<br>Technology Sydney<br>Australia               | Wallau, Gabriel<br>Public Health Researcher<br>Oswaldo Cruz Foundation<br>Brazil                                     |
| Waller, Donald<br>Professor of Botany & Environmental Studies<br>University of Wisconsin - Madison<br>United States of America (the)                   | Wallgren, Märtha<br>PhD Ecology<br>Forestry research institute of Sweden<br>Sweden                                                                                 | Wallin, Marcus<br>Reseracher<br>Uppsala University, Depart of Earth Sciences<br>Sweden                               |
| Wallis, Janette<br>Lecturer - Environmental Studies<br>University of Oklahoma<br>United States of America (the)                                        | WallisDeVries, Michiel<br>Special Proefessor Insect Ecology and Conservation<br>Wageningen University<br>Netherlands (the)                                         | Walls, Fred<br>Physicist<br>Total Frequency<br>United States of America (the)                                        |
| Walls, Helen<br>Assistant Professor<br>London School of Hygiene and Tropical Medicine<br>United Kingdom of Great Britain and Northern Ireland<br>(the) | Walls, Kelvin<br>Built environment & its effects on public health<br>Building Code Consultants Ltd<br>New Zealand                                                  | Walquist, Ryan<br>Graduate Student<br>Simon Fraser University<br>Canada                                              |
| Walsh, Jessica<br>Conservation Ecologist, Post-doctoral Research Fellow<br>Simon Fraser University<br>Canada                                           | walsh, julia<br>Professor of Maternal and Child Health and International<br>Health, Retired<br>University of California Berkeley<br>United States of America (the) | Walsh, Kevin<br>Engineering<br>Scripps Institution of Oceanography<br>United States of America (the)                 |
| Walsh, Ryan<br>Conservation biologist<br>The Toledo Zoo<br>United States of America (the)                                                              | Walsh, Seana<br>Conservation Biologist<br>National Tropical Botanical Garden<br>United States of America (the)                                                     | Walsh, Stephen<br>Research Biologist<br>University of Florida<br>United States of America (the)                      |

|                                                                                                                                                    |                                                                                                                            |                                                                                                                 |
|----------------------------------------------------------------------------------------------------------------------------------------------------|----------------------------------------------------------------------------------------------------------------------------|-----------------------------------------------------------------------------------------------------------------|
| Walston, Joseph<br>Vice-President, Global Conservation Program<br>Wildlife Conservation Society (WCS)<br>United States of America (the)            | Walter, Bettina<br>Research Officer<br>Swansea uNiversity<br>United Kingdom of Great Britain and Northern Ireland<br>(the) | Walter, David<br>Atmospheric/Multiphase Chemistry<br>Max Planck Institute for Chemistry<br>Germany              |
| Walter, Juline Marta<br>Post-Doc<br>Federal University of Rio de Janeiro<br>Brazil                                                                 | Walters, Ashley<br>PhD candidate<br>Miami University<br>United States of America (the)                                     | Walters, Bradley<br>Professor and Coordinator of Environmental Studies<br>Mount Allison University<br>Canada    |
| Walters, Michele<br>Senior Scientist<br>Council for Scientific and Industrial Research<br>South Africa                                             | Waltert, Matthias<br>Conservation Biologist<br>University of Göttingen<br>Germany                                          | Waltke, Andrew<br>Biology lab coordinator<br>Creighton university<br>United States of America (the)             |
| Walton, Jeremy<br>Scientific Systems Manager, UK Earth System Model<br>Met Office<br>United Kingdom of Great Britain and Northern Ireland<br>(the) | Walton, Merrilyn<br>Professor of Medical Education<br>University of Sydney<br>Australia                                    | Walz, Ulrich<br>Professor of Landscape Ecology<br>Dresden University of Applied Sciences<br>Germany             |
| Walzer, Chris<br>Executive Director Wildlife Health / Veterinary Science<br>Wildlife Conservation Society<br>United States of America (the)        | Wamunyu, Abi<br>Kenya                                                                                                      | Wan, Yi<br>Xishuangbanna Tropical Botanical Garden, Chinese<br>Academy of Sciences<br>China                     |
| Wanat, Marek<br>Professor, Biology (Entomology)<br>Museum of Natural History, University of Wroclaw<br>Poland                                      | Wanderley, Maria das Graças *<br>Scientific Researcher<br>Instituto de Botanica<br>Brazil                                  | Wandycz-Mejías, Joanna<br>Deputy Director International Center<br>Universidad Pablo de Olavide<br>Spain         |
| Wang, Binbin<br>Cornell University<br>United States of America (the)                                                                               | Wang, Cui<br>China                                                                                                         | Wang, Daryi<br>Associate Research Fellow<br>Biodiversity Research Center, Academia Sinica<br>Taiwan             |
| Wang, Dong<br>Assistant Professor<br>University of Massachusetts Amherst<br>United States of America (the)                                         | Wang, He<br>PhD student<br>IGOE<br>China                                                                                   | Wang, John<br>Social evolution<br>Biodiversity Research Center, Academia Sinica<br>Taiwan                       |
| Wang, Lu<br>China                                                                                                                                  | Wang, Shuai<br>associate professor<br>CAAS<br>China                                                                        | Wang, Thea<br>Researcher<br>San Diego Zoo Institute for Conservation Research<br>United States of America (the) |



|                                                                                                                                                                                                        |                                                                                                                                                                                        |                                                                                                                                                                   |
|--------------------------------------------------------------------------------------------------------------------------------------------------------------------------------------------------------|----------------------------------------------------------------------------------------------------------------------------------------------------------------------------------------|-------------------------------------------------------------------------------------------------------------------------------------------------------------------|
| Wang, Tzi-Yuan<br>Associate Research specialist<br>Biodiversity Research Center, Academia Sinica<br>Taiwan                                                                                             | Wang, Yingying<br>China                                                                                                                                                                | Wang, Yingying<br>PhD candidate<br>Wageningen University<br>Netherlands (the)                                                                                     |
| Wang, Zhou<br>Post doctor<br>INFN-LNGS<br>Italy                                                                                                                                                        | Wangensteen, Owen S.<br>Marine molecular ecologist<br>School of Environment & Life Sciences, University of<br>Salford<br>United Kingdom of Great Britain and Northern Ireland<br>(the) | Wanless, Ross<br>Seabird Conservation Programme Manager<br>BirdLife South Africa<br>South Africa                                                                  |
| Want, Andrew<br>Research Associate - Marine Ecology<br>Heriot-Watt University<br>United Kingdom of Great Britain and Northern Ireland<br>(the)                                                         | Ward, Michelle<br>PhD Student in Conservation Biology<br>University of Queensland<br>Australia                                                                                         | Ward, Selina<br>Senior Lecturer<br>The University of Queensland<br>Australia                                                                                      |
| Wardell-Johnson, Grant<br>A/Prof, Forest Ecology<br>Curtin University<br>Australia                                                                                                                     | Warden, Andrew<br>Senior Research Scientist, chemistry/enzymology<br>Australia                                                                                                         | Wardle, Glenda<br>Professor in Ecology and Evolution<br>The University of Sydney<br>Australia                                                                     |
| Wardrop, Nicholas<br>Manager & Electrical Engineer - Renewable & Efficient<br>Energy<br>Sunergy Consulting<br>Australia                                                                                | Waridel, Laure<br>PhD Anthropology and sociology of Development<br>Institut des hautes études internationales et du<br>développement (IHEID)<br>Canada                                 | Waring, Richard<br>Emeritus Professor of Forest Ecology<br>Oregon State University<br>United States of America (the)                                              |
| Warkentin, Karen<br>Professor of Biology<br>Boston University<br>United States of America (the)                                                                                                        | Warlop, Francois<br>Agronomy<br>GRAB<br>France                                                                                                                                         | Warnaars, Tanya<br>Scientific Project Manager & Ecohydrologist<br>Centre for Ecology & Hydrology<br>United Kingdom of Great Britain and Northern Ireland<br>(the) |
| Warne, Michael<br>Professor of Ecotoxicology and Water Quality<br>Centre for Agrecology, Water and Resilience, Coventry<br>University<br>United Kingdom of Great Britain and Northern Ireland<br>(the) | Warner, Kayla<br>Nutrition and Garden Educator<br>Oregon State University Extension- Clatsop County<br>United States of America (the)                                                  | Warnholtz, Birthe<br>Masterstudent<br>Stockholm University<br>Sweden                                                                                              |
| Warpechowski, Marson<br>Full Professor - Animal Science<br>Universidade Federal do Paraná<br>Brazil                                                                                                    | Warren, Dana<br>Assistant Professor<br>Oregon State University<br>United States of America (the)                                                                                       | Warren, Karin<br>Professor of Environmental Studies & Science<br>Randolph College<br>United States of America (the)                                               |

|                                                                                                                                  |                                                                                                                                                 |                                                                                                                                         |
|----------------------------------------------------------------------------------------------------------------------------------|-------------------------------------------------------------------------------------------------------------------------------------------------|-----------------------------------------------------------------------------------------------------------------------------------------|
| Warren-Thomas, Eleanor<br>PhD student<br>University of East Anglia<br>United Kingdom of Great Britain and Northern Ireland (the) | Warrington, Miyako<br>Assistant Professor, Behavioural Ecology & Conservation Biology<br>St. George's University<br>Grenada                     | Wartchow, Dieter<br>Professor<br>Instituto de Pesquisas Hidráulicas/ Federal University of Rio Grande do Sul (UFRGS)<br>Brazil          |
| Wartzok, Douglas<br>Professor of Biology<br>Florida International University<br>United States of America (the)                   | WARWICK-EVANS, VICTORIA<br>Postdoc research scientist<br>British Antarctic Survey<br>United Kingdom of Great Britain and Northern Ireland (the) | Waser, Nickolas<br>Professor of Biology Emeritus<br>University of California Riverside<br>United States of America (the)                |
| Waser, Peter<br>Professor, Emeritus, Biological Sciences<br>Purdue University<br>United States of America (the)                  | Washburne, Alex<br>Epidemiologist, Ecologist and Mathematical Biologist<br>Montana State University<br>United States of America (the)           | Washington, Haydn<br>Adjunct Lecturer/ Environmental Scientist<br>PANGEA Research Centre, UNSW Australia<br>Australia                   |
| Waska, Hannelore<br>Germany                                                                                                      | Wassenaar, Theo<br>Ecologist<br>Gobabeb Research and Training Centre<br>Namibia                                                                 | Wasser, Samuel<br>Professor, Conservation Biology<br>University of Washington<br>United States of America (the)                         |
| Wasserman, Michael<br>Assistant Professor<br>Indiana University<br>United States of America (the)                                | Wassie, Hailu Menale *<br>Conservation<br>Debre Tabor University, Guna Tana Integrated Field Research and Development Center<br>Ethiopia        | Wasteson, Yngvild<br>Professor in veterinary medicine<br>Norwegian University of Life Sciences<br>Norway                                |
| Waszak, Sebastian<br>Postdoctoral Fellow / Genome Biology<br>European Molecular Biology Laboratory (EMBL)<br>Germany             | Waterhouse, Lynn<br>PhD Candidate<br>Scripps Institution of Oceanography<br>United States of America (the)                                      | Waterman, Carly<br>Conservation Biologist<br>Zoological Society of London<br>United Kingdom of Great Britain and Northern Ireland (the) |
| Waterschoot, Béranger<br>Evolutionary Ecology<br>Université catholique de Louvain<br>Belgium                                     | Watling, Dick<br>Principal / Environmental Scientist<br>Environment Consultants Fiji Ltd.<br>Fiji                                               | Watson, Anne<br>Freshwater Ecologist<br>University of Tasmania<br>Australia                                                             |
| Watson, David<br>Social researcher<br>University of East Anglia<br>United Kingdom of Great Britain and Northern Ireland (the)    | Watson, David<br>Professor of Ecology<br>Charles Sturt University<br>Australia                                                                  | Watson, James<br>Director Science and Research Initiative<br>Wildlife Conservation Society<br>Australia                                 |
| Watson, Katheryn<br>PhD Student studying raptors and wind energy<br>Texas Tech University<br>United States of America (the)      | Watson, Maggie<br>Lecturer, Ornithology and Parasitology<br>Charles Sturt University<br>Australia                                               | Watson, Nathan<br>Science Education<br>Portland Public Schools<br>United States of America (the)                                        |

|                                                                                                                                 |                                                                                                                                                    |                                                                                                                                                                  |
|---------------------------------------------------------------------------------------------------------------------------------|----------------------------------------------------------------------------------------------------------------------------------------------------|------------------------------------------------------------------------------------------------------------------------------------------------------------------|
| WATSON, RICHARD<br>President & CEO / Conservation<br>The Peregrine Fund<br>United States of America (the)                       | Wattier, Rémi<br>Associate Professor in Evolutionary Biology<br>UMR Biogeosciences Ub-CNRS 6282 University of<br>Bourgundy Franche Comté<br>France | Watts, Darrel<br>Botanist<br>Bath Spa University<br>United Kingdom of Great Britain and Northern Ireland<br>(the)                                                |
| Watts, David<br>Professor of Anthropology<br>Yale University<br>United States of America (the)                                  | Watts, David<br>Postdoctoral Researcher, Ecology<br>Université de Sherbrooke<br>Canada                                                             | Wauchope, Hannah<br>PhD Student, Zoology<br>The University of Cambridge<br>United Kingdom of Great Britain and Northern Ireland<br>(the)                         |
| Wauthy, Maxime<br>PhD student in biology<br>Université du Québec à Chicoutimi<br>Canada                                         | Waymire, Edward<br>Professor of Mathematics (Probability)<br>Oregon State University<br>United States of America (the)                             | Weako, Jackson<br>Ph.D Student, Computational Sciences and Engineering<br>Koç University<br>Turkey                                                               |
| Wearing, Christopher Howard<br>Honorary Fellow<br>Plant and Food Research Institute of New Zealand<br>New Zealand               | Wearing, Oliver<br>Canada                                                                                                                          | Wearn, Oliver<br>Post-doctoral Researcher<br>Institute of Zoology, Zoological Society of London<br>United Kingdom of Great Britain and Northern Ireland<br>(the) |
| Weaver, Andrew<br>Professor<br>University of Victoria<br>Canada                                                                 | Weaver, Samuel<br>Ph.D student<br>University of Minnesota<br>United States of America (the)                                                        | Weaver, Sarah<br>Professor of Chemistry<br>Xavier University of Louisiana<br>United States of America (the)                                                      |
| Weaver, Shannon<br>Marine Science<br>University of Waikato<br>New Zealand                                                       | Webb, Arthur<br>Coastal Science - Pacific Islands<br>University of Wollongong<br>Kiribati                                                          | Webb, Edward L.<br>Associate Professor of Biology<br>National University of Singapore<br>Singapore                                                               |
| Webb, Ryan<br>Institute of Arctic and Alpine Research<br>United States of America (the)                                         | Webb, Sara<br>Professor of Biology and Environmental Studies<br>Drew University<br>United States of America (the)                                  | Webb, William<br>Wildlife Biologist and Biology Instructor<br>Foothill College<br>United States of America (the)                                                 |
| Webber, Bruce<br>Adjunct Associate Professor, School of Biological Sciences<br>The University of Western Australia<br>Australia | Webeck, Adam<br>Ecologist<br>Australian Wildlife Conservancy<br>Australia                                                                          | Weber, Alexandra Anh-Thu<br>Postdoctoral researcher<br>University of Basel<br>Switzerland                                                                        |

|                                                                                                                                           |                                                                                                                                                                    |                                                                                                                                                                                              |
|-------------------------------------------------------------------------------------------------------------------------------------------|--------------------------------------------------------------------------------------------------------------------------------------------------------------------|----------------------------------------------------------------------------------------------------------------------------------------------------------------------------------------------|
| Weber, Delene<br>Dean (Division of Information Technology, Engineering and the Environment)<br>University of South Australia<br>Australia | Weber, Donald<br>Research Entomologist<br>USDA Agricultural Research Service<br>United States of America (the)                                                     | Weber, Eliseu<br>Postdoctoral fellow<br>Universidade Federal do Rio Grande do Sul<br>Brazil                                                                                                  |
| Weber, Jesse<br>MS Environmental Science and Policy<br>Northern Arizona University<br>United States of America (the)                      | Weber, Marc *<br>Physics<br>Agfa-Gevaert HealthCare GmbH<br>Germany                                                                                                | Weber, Marcelo<br>Postdoc fellow - Macroecology<br>Universidade Federal do Rio de Janeiro<br>Brazil                                                                                          |
| Weber, Michael<br>Professor for Silviculture<br>Technical University Munich<br>Germany                                                    | Weber, Nicola<br>Conservation Officer<br>UK Overseas Territories Conservation Forum<br>United Kingdom of Great Britain and Northern Ireland (the)                  | Weber, Nino<br>PhD student in Agriculture/ Plant nutrition and rhizosphere biology<br>University of Hohenheim, Stuttgart<br>Germany                                                          |
| Webster, Andrea<br>Large Carnivore Ecology<br>South Africa                                                                                | Webster, Angie<br>Health and social sciences/educator<br>ex student/teacher : Southampton University<br>United Kingdom of Great Britain and Northern Ireland (the) | Webster, William *<br>Associate Dean, College of Arts and Sciences, and Professor of Biology and Marine Biology<br>University of North Carolina Wilmington<br>United States of America (the) |
| Weelinck, Tim<br>PhD student<br>University of Edinburgh<br>United Kingdom of Great Britain and Northern Ireland (the)                     | Weese, Gordon<br>Teacher<br>Nisga'a Elementary-Secondary School<br>Canada                                                                                          | Wefer, Jori Maylin<br>PhD Candidate<br>German Institute for Integrative Biodiversity Research (iDiv)<br>Germany                                                                              |
| Weger, Jacob<br>PhD candidate, anthropology<br>University of Georgia<br>United States of America (the)                                    | wegge, per<br>Professor emeritus<br>Norwegian University of Life Sciences<br>Norway                                                                                | Weglarz, Kathryn<br>PhD Candidate<br>Utah State University<br>United States of America (the)                                                                                                 |
| Wehi, Priscilla<br>Research scientist<br>New Zealand                                                                                      | Wehr, Richard<br>Research Associate, Ecology and Evolutionary Biology<br>University of Arizona<br>United States of America (the)                                   | Wehrle, Beck<br>Ph.D. candidate, Ecology and Evolutionary Biology<br>University of California, Irvine<br>United States of America (the)                                                      |
| Wei, Cunzheng<br>Asistant professor/Ecology<br>Institute of Bontany, the Chinese Academy of Science<br>China                              | Weigel, Benjamin<br>Environmental and Marine Biology<br>Åbo Akademi<br>Finland                                                                                     | Weigel, Rebeca *<br>Researcher<br>Quimtia S.A<br>Brazil                                                                                                                                      |
| Weigelt, Patrick<br>Plant Macroecology and Island Biogeography<br>University of Goettingen<br>Germany                                     | Weihermueller, Lutz<br>Senior Scientist Soil Hydrology<br>Research Center Juelich<br>Germany                                                                       | Weijtmans, Kim<br>Scientist<br>Netherlands (the)                                                                                                                                             |

|                                                                                                                                                                                 |                                                                                                                               |                                                                                                                                                                                               |
|---------------------------------------------------------------------------------------------------------------------------------------------------------------------------------|-------------------------------------------------------------------------------------------------------------------------------|-----------------------------------------------------------------------------------------------------------------------------------------------------------------------------------------------|
| Weil, Ernesto<br>Professor and Researcher in Coral Reef Ecology and Evolution<br>University of Puerto Rico<br>Puerto Rico                                                       | Weinberger, Vanessa<br>PhD in Biological Science (Ecology)<br>Pontificia Universidad Católica de Chile<br>Chile               | Weiner, Susan<br>Assistant Professor of Biology<br>Roosevelt University<br>United States of America (the)                                                                                     |
| Weinfurther, Kayla<br>Masters Student/Ecology and Evolution<br>East Carolina University<br>United States of America (the)                                                       | Weingarten, Erin<br>Student<br>Duke University<br>United States of America (the)                                              | Weinstein, David<br>Marine Geologist Post Doctoral Fellow<br>Interuniversity Institute for Marine Sciences, Eilat and<br>The Hebrew University of Jerusalem<br>United States of America (the) |
| Weinstein, Scott<br>Clinical toxinologist, family physician, herpetologist<br>Women's and Children's Hospital and the University of<br>Adelaide School of Medicine<br>Australia | Weintraub, Jason D.<br>Entomologist<br>Academy of Natural Sciences (ANSP), Philadelphia<br>United States of America (the)     | Weintraub, Samantha<br>Terrestrial Biogeochemist<br>National Ecological Observatory Network<br>United States of America (the)                                                                 |
| Weis, Judith<br>Professor Emerita Marine Biology<br>Rutgers University<br>United States of America (the)                                                                        | Weis, Peddrick<br>Prof. of Radiology (retired)<br>Rutgers University - N. J. Medical School<br>United States of America (the) | Weisberg, Peter<br>Professor (Ecology)<br>University of Nevada, Reno<br>United States of America (the)                                                                                        |
| Weisblat, David<br>Prof., Cel & Dev. Biol., Dept. of Molecular & Cell Biol.<br>Univ. of California, Berkeley<br>United States of America (the)                                  | Weisbuch, Gérard<br>Retired senior research associate<br>Ecole Normale Supérieure Paris<br>France                             | Weise, Florian<br>Post-doctoral researcher / Wildlife Management<br>University of Pretoria<br>Botswana                                                                                        |
| Weiser, Frank<br>PhD Student in Biogeography<br>University of Bayreuth<br>Germany                                                                                               | Weiss, Gregory<br>Chemical Biology<br>University of California, Irvine<br>United States of America (the)                      | Weiss, Kenneth<br>Professor emeritus<br>Penn State University<br>United States of America (the)                                                                                               |
| Weiss, Kristen<br>Science Communication<br>Stanford University<br>United States of America (the)                                                                                | Weisser, Wolfgang *<br>University Professor<br>Technical University of Munich<br>Germany                                      | Weißhuhn, Peter<br>PhD Student in Landscape Ecology<br>Leibniz Centre for Agricultural Landscape Research (ZALF)<br>Germany                                                                   |
| Weiss-Lehman, Christopher<br>Postdoctoral researcher in Ecology, Evolution, and<br>Behavior Department<br>University of Minnesota<br>United States of America (the)             | Weissman, Adam<br>Marine Ecologist<br>Haifa University<br>Israel                                                              | weissman, david<br>Ph.D. entomology<br>California Academy of<br>United States of America (the)                                                                                                |

|                                                                                                                                                                         |                                                                                                                         |                                                                                                                                                                             |
|-------------------------------------------------------------------------------------------------------------------------------------------------------------------------|-------------------------------------------------------------------------------------------------------------------------|-----------------------------------------------------------------------------------------------------------------------------------------------------------------------------|
| Weissman, Yishai<br>Ph.D. candidate, Zoologist<br>Bar-Ilan University<br>Israel                                                                                         | Weist, Cornelia<br>Geographer<br>Senckenberg Biodiversity and Climate Research Centre<br>Germany                        | Weitemier, Kevin<br>Evolutionary Biology<br>Oregon State University<br>United States of America (the)                                                                       |
| Welch, Allison<br>Associate Professor of Biology and Director of<br>Environmental and Sustainability Studies<br>College of Charleston<br>United States of America (the) | Welch, JR<br>Professor of Archaeology and Resource Management<br>Simon Fraser University<br>Canada                      | Welch, Kylie<br>Oceanographic Research Assistant<br>Oregon State University<br>United States of America (the)                                                               |
| Welch, PhD, Jessica<br>Ecology & Evolutionary Biology<br>United States of America (the)                                                                                 | Weldrick, Christine<br>PhD Candidate<br>Institute for Marine & Antarctic Studies/University of<br>Tasmania<br>Australia | Welgemoed, Tanya<br>MSc Student<br>University of Pretoria<br>South Africa                                                                                                   |
| Welker, Frido<br>Postdoc<br>Max-Planck-Institute for Evolutionary Anthropology<br>Germany                                                                               | Weller, Rolf<br>Senior scientist, Chemist<br>Afred-Wegener-Institut<br>Germany                                          | Wells, Alice<br>Entomologist<br>Retired<br>Australia                                                                                                                        |
| Wells, Harry<br>Restoration Ecologist<br>World Agroforestry Centre (ICRAF)<br>Kenya                                                                                     | Wells, Jeffrey<br>Science and Policy Director<br>Boreal Songbird Initiative<br>United States of America (the)           | Wels, Harry<br>Organisational Antgropology<br>Vrije Universiteit Amsterdam<br>Netherlands (the)                                                                             |
| Welsh, Hartwell<br>Research wildlife biologist/ecologist/herpetologist<br>U.S. Forest Service research (retired)<br>United States of America (the)                      | Welton, Kathleen<br>Publishing<br>United States of America (the)                                                        | Wemelsfelder, Francoise<br>Professor of Animal Welfare and Qualitative Science<br>Scotland's Rural College<br>United Kingdom of Great Britain and Northern Ireland<br>(the) |
| Wemmer, Chris<br>Scientist Emeritus<br>Smithsonian National Zoological Park<br>United States of America (the)                                                           | Wen, Florence<br>Graduate Student<br>Southeastern Louisiana University<br>United States of America (the)                | Wenden, Bénédicte<br>Plant biologist<br>INRA<br>France                                                                                                                      |
| Wendt, Amanda<br>Ecologist<br>Costa Rica                                                                                                                                | Wenger, Amelia<br>University of Queensland<br>Australia                                                                 | wensvoort, Jaap<br>Zoo nutritionist<br>Toronto zoo<br>Canada                                                                                                                |
| Wenzel, John W<br>Entomologist<br>Carnegie Museum of Natural History<br>United States of America (the)                                                                  | Werdelin, Lars<br>Professor, paleobiology<br>Sweden                                                                     | Werhahn, Geraldine<br>Wildlife Conservation Research Unit, University of Oxford<br>Switzerland                                                                              |

|                                                                                                                                                                                                             |                                                                                                                                                   |                                                                                                                                                      |
|-------------------------------------------------------------------------------------------------------------------------------------------------------------------------------------------------------------|---------------------------------------------------------------------------------------------------------------------------------------------------|------------------------------------------------------------------------------------------------------------------------------------------------------|
| <p>Werneck, Márcio<br/>Professor<br/>Universidade Federal do ABC<br/>Brazil</p>                                                                                                                             | <p>Werner, Adrian<br/>Professor of Hydrogeology<br/>Flinders University<br/>Australia</p>                                                         | <p>Werner, Inge<br/>Director<br/>Swiss Centre for Applied Ecotoxicology<br/>Switzerland</p>                                                          |
| <p>Werner, Jeffery<br/>Wildlife Ecologist, PhD, RPBio<br/>Provincial Government<br/>Canada</p>                                                                                                              | <p>Werner, Stephanie<br/>Postdoctoral Researcher/ Molecular Plant Biology<br/>Leibniz Institute of Plant Biochemistry<br/>Germany</p>             | <p>Werner, Tim<br/>Research Fellow, Environmental Engineering<br/>RMIT University<br/>Australia</p>                                                  |
| <p>Werner, Yehidah Leopold<br/>Professor emeritus of Zoology<br/>The Hebrew University of Jerusalem<br/>Israel</p>                                                                                          | <p>Werner Ferreira, Francesca *<br/>Biologa<br/>Universidade regional do Noroeste do Rio Grande do Sul<br/>Brazil</p>                             | <p>Wesche, Karsten<br/>Professor, Biodiversity of Plants<br/>Senckenberg Museum of Natural History, Görlitz<br/>Germany</p>                          |
| <p>Weslawski, Jan-Marcin<br/>professor/ marine ecology<br/>Institute of Oceanology Polish Academy of Sciences<br/>Poland</p>                                                                                | <p>Wesselingh, Frank<br/>senior researcher, palaeontology<br/>Naturalis Biodiversity Center<br/>Netherlands (the)</p>                             | <p>Wesselingh, Renate<br/>professor in evolutionary ecology<br/>UCLouvain<br/>Belgium</p>                                                            |
| <p>Wessely, Johannes<br/>research assistant<br/>University of Vienna<br/>Austria</p>                                                                                                                        | <p>Wesson, Timothy<br/>BA Mathematics &amp; Philosophy<br/>Open University<br/>United Kingdom of Great Britain and Northern Ireland<br/>(the)</p> | <p>West, Geoffrey<br/>Distinguished Professor<br/>Santa Fe Institute<br/>United States of America (the)</p>                                          |
| <p>West, Harry G.<br/>Professor of Anthropology and Co-Director of the Centre<br/>for Rural Policy Research<br/>University of Exeter<br/>United Kingdom of Great Britain and Northern Ireland<br/>(the)</p> | <p>West, Melina<br/>Psychology<br/>University of Queensland<br/>Australia</p>                                                                     | <p>West, Paige<br/>Claire Tow Professor of Anthropology<br/>Barnard College and Columbia University<br/>United States of America (the)</p>           |
| <p>Westergren, Marjana<br/>Researcher, Forestry<br/>Slovenian Forestry Institute<br/>Slovenia</p>                                                                                                           | <p>Westerling, LeRoy<br/>Associate Professor<br/>University of California, Merced<br/>United States of America (the)</p>                          | <p>Westermann, Fabian<br/>Senior Tutor, Biology/Ecology<br/>Victoria University of Wellington, School of Biological<br/>Sciences<br/>New Zealand</p> |
| <p>Weston, Michael<br/>Associate Professor, Wildlife and Conservation Biology<br/>Deakin University<br/>Australia</p>                                                                                       | <p>Westphal, Tiago Henrique<br/>Brazil</p>                                                                                                        | <p>Westra, Laura<br/>Doctor, Faculty of Law<br/>University of Windsor, Ontario<br/>Canada</p>                                                        |

|                                                                                                                                                                                    |                                                                                                                                                         |                                                                                                                                        |
|------------------------------------------------------------------------------------------------------------------------------------------------------------------------------------|---------------------------------------------------------------------------------------------------------------------------------------------------------|----------------------------------------------------------------------------------------------------------------------------------------|
| Weterings, Martijn<br>PhD Resource Ecology<br>Van Hall Larenstein & Wageningen University & Research<br>Netherlands (the)                                                          | Wetherington, Miles<br>PhD Student, Ecology<br>Pontificia Universidad Católica de Chile<br>Chile                                                        | Weusthoff, Tanja<br>Meteorology<br>MeteoSwiss<br>Switzerland                                                                           |
| Wevers, Jolien<br>PhD student - zoology<br>University of Hasselt<br>Belgium                                                                                                        | Weyer, Nora<br>Ph.D. candidate<br>University of the Witwatersrand<br>South Africa                                                                       | Weyn, Mieke<br>Marine biologist<br>Belgium                                                                                             |
| Whale, Jonathan<br>Academic Chair of Energy and Carbon Studies<br>Murdoch University<br>Australia                                                                                  | Whatley, Art<br>Professor<br>Hawaii pacific university<br>United States of America (the)                                                                | Wheatley, Amber<br>Doctor (MD)<br>Hywel Dda University Health Board<br>Virgin Islands (British)                                        |
| Wheeler, Caroline<br>Lecturer in Biological Sciences (retired)<br>Suffolk College of Further and Higher Education<br>United Kingdom of Great Britain and Northern Ireland<br>(the) | Wheeler, Casey<br>Genomics Core Facility Manager - Biochemistry<br>University of Nevada, Las Vegas<br>United States of America (the)                    | Wheeler, David *<br>Medical Practitioner<br>Self employed<br>United Kingdom of Great Britain and Northern Ireland<br>(the)             |
| Wheeler, Kevin<br>Water Resource Engineer<br>Water Balance Consulting<br>United States of America (the)                                                                            | Whelan, Julia<br>Biologist Ecology/Zoology<br>New Zealand                                                                                               | Whisson, Desley<br>Senior lecturer in wildlife and conservation biology<br>Deakin University<br>Australia                              |
| Whitacre, David F.<br>Ph.D. Zoology<br>Treasure Valley Math and Science Center<br>United States of America (the)                                                                   | Whitaker, Stephen<br>Marine Ecologist<br>National Park Service<br>United States of America (the)                                                        | White, Darla<br>Marine Scientist / Coral Reef Ecologist<br>Hawaii DLNR Division of Aquatic Resources<br>United States of America (the) |
| White, Easton<br>Mathematical ecologist<br>University of California, Davis<br>United States of America (the)                                                                       | White, Helen<br>Ecologist - PhD Candidate<br>University of Western Australia<br>Australia                                                               | White, Joël<br>Assistant Professor in Evolutionary Ecology<br>Université de Toulouse<br>France                                         |
| White, Mary<br>Professor, Biological Sciences<br>Southeastern Louisiana University<br>United States of America (the)                                                               | White, Matthew<br>Professor of Biological Sciences<br>Ohio University<br>United States of America (the)                                                 | White, Melissa<br>Ecologist<br>South Australian, Department of Environment, Water<br>and Natural Resources<br>Australia                |
| White, Paula<br>Senior Research Fellow<br>Center for Tropical Research, Institute of the<br>Environment and Sustainability, UCLA<br>United States of America (the)                 | White, Rachel<br>Senior Lecturer in Ecology and Conservation<br>University of Brighton<br>United Kingdom of Great Britain and Northern Ireland<br>(the) | White, Raymond R.<br>Professor, Biological Sciences<br>City College of San Francisco<br>United States of America (the)                 |



|                                                                                                                                                  |                                                                                                                                             |                                                                                                                                                           |
|--------------------------------------------------------------------------------------------------------------------------------------------------|---------------------------------------------------------------------------------------------------------------------------------------------|-----------------------------------------------------------------------------------------------------------------------------------------------------------|
| White, Seth<br>Watershed Ecologist<br>Columbia River Inter-Tribal Fish Commission<br>United States of America (the)                              | White, Shane<br>Wildlife Biologist<br>BC Ministry of Forests, Lands and Natural Resource<br>Operations<br>Canada                            | White III, Dr. Richard Allen<br>Omics of complex microbial communities<br>Idaho State University<br>United States of America (the)                        |
| Whiteman, Noah<br>Associate Professor, Department of Integrative Biology<br>University of California, Berkeley<br>United States of America (the) | Whitfield, Alan<br>Chief Scientist<br>South African Institute for Aquatic Biodiversity<br>South Africa                                      | Whitlock, Dani<br>PhD Student<br>Edinburgh Napier University<br>United Kingdom of Great Britain and Northern Ireland<br>(the)                             |
| Whitman, Elizabeth<br>United States of America (the)                                                                                             | Whitmore, Jenny<br>Marine ecology research scientist<br>Bangor University<br>United Kingdom of Great Britain and Northern Ireland<br>(the)  | Whitney, Charlotte<br>PhD Candidate<br>University of Victoria<br>Canada                                                                                   |
| Whitten, Miranda<br>PhD, medical entomology<br>Swansea University<br>United Kingdom of Great Britain and Northern Ireland<br>(the)               | Whitworth, Andrew<br>Director of Restoration Ecology & Biodiversity<br>Conservation<br>Osa Conservation<br>Costa Rica                       | WHYTE, CALLUM<br>PDRA PHYTOPLANKTON ECOLOGIST<br>SCOTTISH ASSOCIATION FOR MARINE SCIENCE<br>United Kingdom of Great Britain and Northern Ireland<br>(the) |
| Whytock, Robin C<br>PhD candidate, Ecology<br>University of Stirling<br>United Kingdom of Great Britain and Northern Ireland<br>(the)            | Wich, Serge<br>Professor in primate biology<br>LJMU<br>United Kingdom of Great Britain and Northern Ireland<br>(the)                        | Wickelgren, Kirsten<br>Assistant Professor in Mathematics<br>Georgia Institute of Technology<br>United States of America (the)                            |
| Wicker-Thomas, Claude<br>Research Director<br>CNRS<br>France                                                                                     | Wickliffe, Jeffrey<br>Associate Professor of Global Environmental Health<br>Sciences<br>Tulane University<br>United States of America (the) | Widmer, Alex<br>Professor of Plant Ecological Genetics<br>ETH Zurich<br>Switzerland                                                                       |
| wiedenhofer, Dominik<br>Researcher, Industrial Ecology<br>Alpen-Adria University Klagenfurt<br>Austria                                           | Wiedmann, Thomas<br>Associate Professor of Sustainability Research<br>UNSW Sydney<br>Australia                                              | Wiegand, Claudia<br>Researcher / Prof.<br>University Rennes1<br>France                                                                                    |
| Wiegand, Kerstin<br>Professor, Ecology<br>University of Goettingen<br>Germany                                                                    | Wielstra, Ben<br>Postdoc<br>UCLA<br>United States of America (the)                                                                          | Wiemers, Martin<br>Entomologist<br>Helmholtz Centre for Environmental Research - UFZ<br>Germany                                                           |

|                                                                                                                                                           |                                                                                                                                                                   |                                                                                                                |
|-----------------------------------------------------------------------------------------------------------------------------------------------------------|-------------------------------------------------------------------------------------------------------------------------------------------------------------------|----------------------------------------------------------------------------------------------------------------|
| Wiener, Jean<br>Director / Marine Sciences<br>FoProBiM (Fondation pour la Protection de la Biodiversité<br>Marine)<br>Haiti                               | Wierda, Michael<br>Environmental Toxicology<br>University of Arizona<br>United States of America (the)                                                            | Wierzbicki, Martin<br>MSc student in Genetics<br>University of Pretoria<br>South Africa                        |
| Wierzbowska, Izabela A. *<br>senior lecturer, ecologist<br>Jagiellonian University<br>Poland                                                              | Wieschaus, Eric<br>Professor, Molecular Biologist, Nobel Laureate 1995<br>Princeton University, Howard Hughes Medical Institute<br>United States of America (the) | Wiese, Marlene<br>Research Fellow Health Sciences<br>Flinders University<br>Australia                          |
| Wiesebron, Lauren<br>Ecologist<br>United States of America (the)                                                                                          | Wiesner, Rudolf<br>Professor for Physiology<br>University of Köln, , Medical Faculty, Center for<br>Physiology and Pathophysiology<br>Germany                     | Wietkamp, Stephan<br>Alfred-Wegener-Institute<br>Germany                                                       |
| Wietzke, Alexander<br>Research associate (PhD student)<br>Department of Ecology and Ecosystem Research, Georg-<br>August-Universität Göttingen<br>Germany | Wietzoreck, Marco<br>PhD position atmospheric and analytical chemistry<br>Max-Planck-Institute for Chemistry<br>Germany                                           | Wiggins, Will<br>Ph.D. candidate<br>Oklahoma State University<br>United States of America (the)                |
| Wignall, Anne<br>Lecturer in Zoology<br>Massey University<br>New Zealand                                                                                  | Wiik, Emma<br>Post-doc: Freshwater and broader ecology<br>Bangor University<br>United Kingdom of Great Britain and Northern Ireland<br>(the)                      | Wiist, William H.<br>Courtesy Faculty, Global Health<br>Oregon State<br>United States of America (the)         |
| Wijedasa, Lahiru S.<br>PhD Candidate - Conservation Biology<br>National University of Singapore<br>Singapore                                              | Wijnsma, Uzume<br>PhD Candidate<br>Leiden University<br>Netherlands (the)                                                                                         | Wiklander, Kerstin<br>Mathematical statistics<br>Sweden                                                        |
| Wiklund, Christer<br>Lecturer<br>UBF, REAL Borås<br>Sweden                                                                                                | Wilbrandt, Jeanne<br>PhD researcher, Genomics<br>Zoologisches Forschungsmuseum A. Koenig, Bonn<br>Germany                                                         | Wilby, Andrew<br>University Faculty Ecologist<br>United Kingdom of Great Britain and Northern Ireland<br>(the) |
| Wilcke, Wolfgang<br>Professor of Geomorphology and Soil Science<br>Karlsruhe Institute of Technology<br>Germany                                           | Wilder, Benjamin T.<br>Director, Desert Laboratory on Tumamoc Hill<br>University of Arizona<br>United States of America (the)                                     | Wilding, Nicholas<br>Biologist<br>Université de La Réunion<br>Réunion                                          |

|                                                                                                                                                                     |                                                                                                                                                                       |                                                                                                                                                                                  |
|---------------------------------------------------------------------------------------------------------------------------------------------------------------------|-----------------------------------------------------------------------------------------------------------------------------------------------------------------------|----------------------------------------------------------------------------------------------------------------------------------------------------------------------------------|
| Wildner, Marcus<br>PhD-Student, Ecohydrology<br>Leibniz-Institute of Freshwater Ecology and Inland<br>Fisheries<br>Germany                                          | Wilf, Peter<br>Professor of Geosciences<br>Pennsylvania State University<br>United States of America (the)                                                            | Wilke, Diego Veras<br>Adjunct Professor<br>Federal University os Ceará<br>Brazil                                                                                                 |
| Wilkening, Jennifer<br>Ecologist<br>United States of America (the)                                                                                                  | Wilkerson, Marit<br>Policy advisor & technical specialist<br>United States Agency for International Development<br>United States of America (the)                     | Wilkes, Martin<br>Research Fellow, Aquatic Ecology<br>Coventry University<br>United Kingdom of Great Britain and Northern Ireland<br>(the)                                       |
| Wilkie, Martin<br>Dr/Conservation<br>Marwell Wildlife, UK<br>United Kingdom of Great Britain and Northern Ireland<br>(the)                                          | Wilkinson, Jeremy<br>Post-doc researcher, Environmental Science, Greenhouse<br>gas emissons<br>University of Koblenz-Landau<br>Germany                                | Wilkinson, John<br>Science Programme Manager/Conservation Biologist<br>Amphibian and Reptile Conservation Trust<br>United Kingdom of Great Britain and Northern Ireland<br>(the) |
| Wilkinson, Mindy<br>Invasive Species Ecologist<br>Primum Terrae LLC<br>United States of America (the)                                                               | Wilkinson, Vicky<br>Wildlife Veterinarian/Research Associate<br>Institute of Zoology, ZSL London Zoo<br>United Kingdom of Great Britain and Northern Ireland<br>(the) | Will, Maria<br>Lecturer Botany<br>Carl von Ossietzky University Oldenburg<br>Germany                                                                                             |
| Willcox, Daniel<br>Conservation<br>Environmental Investigation Agency<br>United Kingdom of Great Britain and Northern Ireland<br>(the)                              | Willemen, Louise<br>Assistant professor, Geo-science for ecosystem services<br>ITC- University of Twente<br>Netherlands (the)                                         | Willems, Thijs<br>Organizational Anthropology<br>Singapore University of Technology and Design<br>Singapore                                                                      |
| Willemse, Marinel<br>South Africa                                                                                                                                   | Willett, Michael<br>Wildlife Conservation MSc<br>University of Salford<br>United Kingdom of Great Britain and Northern Ireland<br>(the)                               | Willett, Walter<br>Professor of Epidemiology and Nutrition<br>Harvard T.H. Chan School of Public Health<br>United States of America (the)                                        |
| Williams, Alice<br>PhD researcher<br>University of Exeter<br>United Kingdom of Great Britain and Northern Ireland<br>(the)                                          | Williams, Ashton<br>University of Guam Marine Laboratory<br>Guam                                                                                                      | Williams, Caroline<br>Assistant Professor, Integrative Biology<br>University of California, Berkeley<br>United States of America (the)                                           |
| Williams, Christopher N.<br>Postdoctoral Research Scientist in Glaciology<br>University of Bristol<br>United Kingdom of Great Britain and Northern Ireland<br>(the) | Williams, David N.<br>Professor Emeritus of Physics<br>University of Michigan<br>United States of America (the)                                                       | Williams, Jeffrey<br>Collections Manager/Ichthyology<br>National Museum of Natural History, Smithsonian<br>Institution<br>United States of America (the)                         |

|                                                                                                                           |                                                                                                                                     |                                                                                                                                       |
|---------------------------------------------------------------------------------------------------------------------------|-------------------------------------------------------------------------------------------------------------------------------------|---------------------------------------------------------------------------------------------------------------------------------------|
| Williams, Kelly<br>PhD Ecology and Evolutionary Biology. Lecturer<br>Ohio University<br>United States of America (the)    | williams, Mark<br>Professor<br>Macquarie University<br>Australia                                                                    | Williams, Nicholas<br>Associate Professor (Ecology)<br>University of Melbourne<br>Australia                                           |
| Williams, Paul<br>Professor Emeritis<br>University of Wisconsin-Madison<br>United States of America (the)                 | Williams, Ramon<br>Graduate Student<br>Natural Resources Institute, University of Manitoba<br>Canada                                | Williams, Richard<br>Lecturer in Geography<br>University of Glasgow<br>United Kingdom of Great Britain and Northern Ireland (the)     |
| Williams, Richard<br>Post-doctoral Fellow<br>Linnaeus University<br>Sweden                                                | Williams, Rob<br>Marine Conservation Biologist<br>Oceans Initiative<br>Canada                                                       | Williams, Robert<br>Estuarine ecologist<br>New South Wales Fisheries (retired)<br>Australia                                           |
| Williams, Rosie<br>PhD Student<br>Brunel University<br>United Kingdom of Great Britain and Northern Ireland (the)         | Williams, Samuel<br>Postdoctoral Research Fellow<br>University of Venda<br>South Africa                                             | Williams, Stephanie<br>United States of America (the)                                                                                 |
| Williams, Stuart<br>Environmental Consultant<br>Freelance<br>Malawi                                                       | Williams, Tanisha<br>PhD Candidate, Ecology & Evolutionary Biology<br>University of Connecticut<br>United States of America (the)   | Williamson, Dennis<br>Geographer/Landscape Ecologist<br>Geoscience International and Deakin University<br>Australia                   |
| Williamson, Grant<br>Senior Research Fellow, Environmental Science<br>University of Tasmania<br>Australia                 | Williamson, Ian<br>Chemist<br>United Kingdom of Great Britain and Northern Ireland (the)                                            | Williamson, Jane<br>Associate Professor<br>Macquarie University<br>Australia                                                          |
| Williamson, Liz<br>Socioecologist<br>University of Stirling<br>United Kingdom of Great Britain and Northern Ireland (the) | Williamson, Mark<br>Professor Emeritus, Biology<br>University of York<br>United Kingdom of Great Britain and Northern Ireland (the) | Williamson, Phillip<br>Science Coordinator<br>University of East Anglia<br>United Kingdom of Great Britain and Northern Ireland (the) |
| willing, richard paul<br>retired faculty, PhD, plant and soil sciencd<br>union college<br>United States of America (the)  | Willingham, Andrea<br>Master of Science, Environmental Studies<br>University of Oregon<br>United States of America (the)            | Willis, Kathryn<br>Phd Candidate<br>CSIRO and University of Tasmania<br>Australia                                                     |
| Willis, Ruth<br>Student in Earth Sciences<br>James Cook University<br>Australia                                           | Willison, J.H. Martin *<br>Retired Professor, Biology and Environmental Studies<br>Dalhousie University<br>Canada                   | Willmer, Julian Nicholas<br>Research assistant<br>Federal University of Rio de Janeiro<br>Brazil                                      |

|                                                                                              |                                                                                                                                                                                          |                                                                                                                             |
|----------------------------------------------------------------------------------------------|------------------------------------------------------------------------------------------------------------------------------------------------------------------------------------------|-----------------------------------------------------------------------------------------------------------------------------|
| Willoughby, Janna<br>Postdoc<br>United States of America (the)                               | Willow, Anna<br>Associate Professor of Anthropology<br>The Ohio State University<br>United States of America (the)                                                                       | Wills, Peter<br>Theoretical Biology<br>University of Auckland<br>New Zealand                                                |
| Willson, Andrew<br>Senior marine consultant<br>Five Oceans Environmental Services<br>Oman    | Willson, Susan<br>Associate Professor, Dept. of Biology; Avian Ecologist<br>St. Lawrence University<br>United States of America (the)                                                    | Wilmé, Lucienne<br>National Coordinator in Madagascar<br>World Resources Institute<br>Madagascar                            |
| Wilmotte, Annick<br>Research Associate FNRS / Microbiology<br>University of Liège<br>Belgium | Wilson, Anna<br>Postdoctoral Scholar<br>Scripps Institution of Oceanography<br>United States of America (the)                                                                            | Wilson, Cheryl<br>Associate Professor, Centre for Materials Science and<br>Technology<br>University of Otago<br>New Zealand |
| Wilson, Dave<br>Math/Retired<br>University of Florida<br>United States of America (the)      | Wilson, Deborah<br>Ecologist<br>New Zealand                                                                                                                                              | Wilson, Edward O.<br>University Research Professor Emeritus/Biology<br>Harvard University<br>United States of America (the) |
| Wilson, Gary<br>Adjunct Research Fellow<br>Australian Tropical Herbarium<br>Australia        | Wilson, Indya<br>Ecologist<br>Griffith University<br>Australia                                                                                                                           | Wilson, Julia<br>Research Fellow<br>University of Otago, Dunedin<br>New Zealand                                             |
| Wilson, Kerry-Jayne<br>Ornithologist<br>West Coast Penguin Trust<br>New Zealand              | Wilson, Luke *<br>Research Fellow<br>University of Otago<br>New Zealand                                                                                                                  | Wilson, Mark<br>Professor, Biology<br>Humboldt State University<br>United States of America (the)                           |
| Wilson, Mark<br>Professor Emeritus of Biological Sciences<br>University of Alberta<br>Canada | Wilson, Matthew<br>Aquatic Entomologist<br>Stroud Water Research Center<br>United States of America (the)                                                                                | Wilson, Megan<br>Entomologist<br>University of Wyoming<br>United States of America (the)                                    |
| Wilson, Nerida<br>Senior Research Scientist<br>Western Australian Museum<br>Australia        | Wilson, Robert<br>Senior Lecturer in Conservation Biology<br>University of Exeter<br>United Kingdom of Great Britain and Northern Ireland<br>(the)                                       | Wilson, Scott<br>Senior lecturer in Environmental Science<br>Macquarie University<br>Australia                              |
| Wilson, Scott<br>Aquatic Biologist, CEO<br>Grassroots Environmental Services<br>Canada       | WILSON OWUSU, FRANCIS *<br>SENIOR RESEARCH SCIENTIST / WOOD SCIENCE &<br>TECHNOLOGY<br>COUNCIL FOR SCIENTIFIC AND INDUSTRIAL RESEARCH -<br>FORESTRY RESEARCH INSTITUTE OF GHANA<br>Ghana | Wimmer, Stefan Jakob<br>Professor of Egyptology<br>University of Munich<br>Germany                                          |

|                                                                                                                                                |                                                                                                                                                                                 |                                                                                                                            |
|------------------------------------------------------------------------------------------------------------------------------------------------|---------------------------------------------------------------------------------------------------------------------------------------------------------------------------------|----------------------------------------------------------------------------------------------------------------------------|
| Winandy, Laurane<br>Post doc<br>Paul Sabatier University - Toulouse III<br>France                                                              | Winck, Gisele<br>Postdoctoral fellow, Ecology<br>Universidade Federal do Rio de Janeiro<br>Brazil                                                                               | Winder, Isabelle<br>Lecturer in Biology<br>Bangor University<br>United Kingdom of Great Britain and Northern Ireland (the) |
| Winder, Linton<br>Professor and entomologist<br>Toi Ohomai Institute of Technology<br>New Zealand                                              | Winemiller, Kirk<br>Regents Professor<br>Texas A&M University<br>United States of America (the)                                                                                 | Winkler, Daniel<br>PhD Student<br>University of California, Irvine<br>United States of America (the)                       |
| Winkler, Manuela<br>Researcher<br>University for Natural Resources and Life Sciences,<br>Vienna (BOKU)<br>Austria                              | Winqvist, Suzie<br>Partner Biologist<br>Point Blue Conservation Science / Natural Resources<br>Conservation Services<br>United States of America (the)                          | Winter, Carlos<br>Associate Professor - Parasitology<br>Universidade de Sao Paulo<br>Brazil                                |
| Winter, Kawika B.<br>Director, Limahuli Garden and Preserve / Botanist<br>National Tropical Botanical Garden<br>United States of America (the) | Winter, Marten<br>Leader of Synthesis Centre<br>German Centre for Integrative Biodiversity Research<br>(iDiv) Halle-Jena-Leipzig<br>Germany                                     | Winter, Ursula Andrea<br>PhD<br>Hospital Garrahan<br>Argentina                                                             |
| Winterbottom, Bronte<br>Biology student<br>Curtin University<br>Australia                                                                      | Winterton, Cathy<br>Marine environmental science PhD researcher<br>Scottish Association for Marine Science (SAMS)<br>United Kingdom of Great Britain and Northern Ireland (the) | Wippich, Frank<br>Postdoctoral fellow<br>EMBL Heidelberg<br>Germany                                                        |
| Wirsing, Aaron<br>Associate Professor<br>University of Washington<br>United States of America (the)                                            | Wirth, Rainer<br>Scientist & Lecturer in Botany and Ecology<br>University of Kaiserslautern<br>Germany                                                                          | Wirtz, Peter<br>Professor<br>Center for Marine Sciences<br>Portugal                                                        |
| Wisz, Mary S.<br>Associate Professor, Marine Science<br>World Maritime University<br>Sweden                                                    | Withers, Kim<br>Assistant Professor of Biology<br>TAMUCC<br>United States of America (the)                                                                                      | Witkowski, Edward<br>Professor of Ecology<br>University of the Witwatersrand, Johannesburg<br>South Africa                 |
| Witt, Matthew<br>Professor of public administration<br>University of La Verne<br>United States of America (the)                                | Witter, Marti<br>Fire Ecologist<br>Santa Monica Mountains National Recreation Area<br>United States of America (the)                                                            | Witter, Rebecca<br>Sustainable Development<br>Appalachian State University<br>United States of America (the)               |
| Witteveen, Minke<br>South Africa                                                                                                               | Wittmann, Florian<br>Head of the Wetland Ecology Department<br>Karlsruhe Institute for Technology<br>Germany                                                                    | Wiziack Zago, Patricia Maria<br>Brazil                                                                                     |

|                                                                                                                     |                                                                                                                                 |                                                                                                                                        |
|---------------------------------------------------------------------------------------------------------------------|---------------------------------------------------------------------------------------------------------------------------------|----------------------------------------------------------------------------------------------------------------------------------------|
| Wloch-Salamon, Dominika<br>PhD Biology<br>Institute of Environmental Sciences, Jagiellonian<br>University<br>Poland | Wöbbecke, Kerstin<br>Limnologist<br>Germany                                                                                     | Wobus, Fred<br>Senior Ocean Model Developer<br>University of Plymouth<br>United Kingdom of Great Britain and Northern Ireland<br>(the) |
| Wohlrab, Sylke<br>Germany                                                                                           | Wohltmann, Andreas<br>Biology<br>Germany                                                                                        | Wolanski, Eric<br>Professor, coastal oceanography<br>James Cook University<br>Australia                                                |
| Wolf, Shaye<br>Climate Science Director<br>Center for Biological Diversity<br>United States of America (the)        | Wolff, Carsten<br>R&D Manager<br>Vision Environment<br>Australia                                                                | Wolff, Jörg-Olaf<br>Professor in physical oceanography<br>ICBM, University of Oldenburg<br>Germany                                     |
| Wölfel, Anne-Cathrin<br>Postdoctoral researcher<br>GEOMAR Helmholtz Centre for Ocean Research Kiel<br>Germany       | Wölfel, Tobias<br>scientific staff/environmental engineer<br>TH Bingen<br>Germany                                               | Wolfram, Jakob<br>Diploma Environmental Sciences<br>University of Koblenz-Landau, Germany<br>Germany                                   |
| Wolkis, Dustin<br>Ecologist<br>National Tropical Botanical Garden<br>United States of America (the)                 | Wollenberg Valero, Katharina<br>Lecturer<br>University of Hull<br>United Kingdom of Great Britain and Northern Ireland<br>(the) | Wollscheid-Lengeling, Evi<br>Biologist<br>Germany                                                                                      |
| Wolmarans, Milena<br>Lecturer in Biology<br>University of Mpumalanga<br>South Africa                                | Wolniakowski, Adam<br>assistant professor<br>Białystok University of Technology<br>Poland                                       | Wolstenholme, Hannah<br>Student studying MSc Marine Biology and Ecology<br>James Cook University<br>Australia                          |
| Wolstenholme, Jackie<br>Librarian; Marine Biology<br>James Cook University<br>Australia                             | Wolverton, Steve<br>Professor, Geography and the Environment<br>University of North Texas<br>United States of America (the)     | Womersley, Freya<br>MSc Student<br>University of Exeter<br>United Kingdom of Great Britain and Northern Ireland<br>(the)               |
| Wong, Chee-Woon *<br>Malaysia                                                                                       | Wong, Tian An<br>Postdoc, Mathematics<br>IISER Pune<br>Malaysia                                                                 | Wongsoredjo, Samor *<br>Physical Geographer<br>Suriname                                                                                |
| Woo, Elizabeth<br>Medical student<br>Yale School of Medicine<br>United States of America (the)                      | Wood, Chris M.<br>Distinguished University Professor, Emeritus Professor of<br>Biology<br>McMaster University<br>Canada         | Wood, Connor<br>Ecologist<br>University of Wisconsin-Madison<br>United States of America (the)                                         |

|                                                                                                                                          |                                                                                                                                                                                                                     |                                                                                                                      |
|------------------------------------------------------------------------------------------------------------------------------------------|---------------------------------------------------------------------------------------------------------------------------------------------------------------------------------------------------------------------|----------------------------------------------------------------------------------------------------------------------|
| Wood, Elizabeth<br>Marine biology and conservation<br>United Kingdom of Great Britain and Northern Ireland (the)                         | Wood-Charlson, Elisha<br>Marine microbiology<br>University of Hawaii at Manoa<br>United States of America (the)                                                                                                     | Wood-Charlson, Elisha<br>Marine Science<br>University of Hawaii<br>United States of America (the)                    |
| Woodcock, Ben<br>Ecologist<br>Centre for Ecology & Hydrology, UK<br>United Kingdom of Great Britain and Northern Ireland (the)           | Woodgett, Jim<br>Director of Research<br>Lunenfeld-Tanenbaum Research Institute<br>Canada                                                                                                                           | Woodley, Stephen<br>Vice-chair, Science and Biodiversity<br>World Commission on Protected areas, IUCN<br>Canada      |
| Woodman, Neal<br>Research Zoologist<br>NMNH<br>United States of America (the)                                                            | Woods, Courtney<br>Clinical Assistant Professor in Environmental Sciences and Engineering<br>Gillings School of Global Public Health, University of North Carolina at Chapel Hill<br>United States of America (the) | Woodwell, George M. *<br>Emeritus Director<br>Woods Hole Research Center<br>United States of America (the)           |
| Woodworth, Bethany<br>Associate Lecturer<br>University of New England<br>United States of America (the)                                  | Woodworth, Brad<br>Ecology<br>The University of Queensland<br>Australia                                                                                                                                             | Woofter, Sabrina<br>Coral Reef and Ecosystem Manager<br>American Samoa's Coral Reef Advisory Group<br>American Samoa |
| Wooldridge, Rebecca<br>Ecology & Conservation<br>University of Belize Environmental Research Institute<br>Belize                         | Woolgar, Alexandra<br>Senior Research Scientist, Cognitive Science<br>Macquarie University<br>Australia                                                                                                             | Woolhouse, Michelle<br>Doctor of medicine<br>Peninsula holistic general practice<br>Australia                        |
| Wooliscroft, Ben<br>Associate Dean Research, Otago Business School<br>University of Otago<br>New Zealand                                 | Woolmer, Gillian<br>Assistant Director<br>Wildlife Conservation Society<br>Canada                                                                                                                                   | Woon, Sy<br>Veterinary scientist<br>University of Sydney<br>Australia                                                |
| Woppelmann, Guy<br>Professor in Earth Sciences<br>University<br>France                                                                   | Woringer, Maxime<br>MSc, Applied Mathematics<br>Institut Pasteur<br>France                                                                                                                                          | Worlow, Linda<br>Botany (retired)<br>Rancho Santa Ana Botanic Garden<br>United States of America (the)               |
| Wormell, Dominic<br>Head of mammals<br>Durrell wildlife conservation trust<br>United Kingdom of Great Britain and Northern Ireland (the) | Wörner, Manuel<br>Research Assistant and PhD Candidate Biogeography<br>Trier University<br>Germany                                                                                                                  | Wouters, Annelies<br>PhD student<br>Hasselt University<br>Belgium                                                    |
| Wouters, Hendrik<br>Climate scientist<br>Ghent University<br>Belgium                                                                     | Wouters, Stefan<br>Biomedical MSc student<br>Utrecht University<br>Netherlands (the)                                                                                                                                | Woyciechowski, Michal *<br>professor, biologist<br>Jagiellonian University<br>Poland                                 |

\* indicates individual also signed 1992 Scientists' Warning to Humanity



|                                                                                                                                                          |                                                                                                                                                                                                      |                                                                                                                                                                                    |
|----------------------------------------------------------------------------------------------------------------------------------------------------------|------------------------------------------------------------------------------------------------------------------------------------------------------------------------------------------------------|------------------------------------------------------------------------------------------------------------------------------------------------------------------------------------|
| <p>Wrage, Christian<br/>MPIC Mainz<br/>Germany</p>                                                                                                       | <p>Wraith, Jenna<br/>PhD Candidate/ Conservation Ecology and Climate Change Modelling<br/>Griffith University<br/>Australia</p>                                                                      | <p>Wrathall, David<br/>Assistant Professor of Natural Hazards<br/>Oregon State University, College of Earth, Ocean and Atmospheric Sciences<br/>United States of America (the)</p> |
| <p>Wrbka, Thomas<br/>Ass.Professor<br/>Univ.Vienna - Dept.Botany &amp; Biodiversity<br/>Austria</p>                                                      | <p>Wreglesworth, Robert<br/>Ecologist<br/>United Kingdom of Great Britain and Northern Ireland (the)</p>                                                                                             | <p>Wright, Amanda<br/>Dr - Senior Advisor - Biodiversity<br/>Natural England<br/>United Kingdom of Great Britain and Northern Ireland (the)</p>                                    |
| <p>Wright, Andrew<br/>Marine mammal conservation biology<br/>George Mason University<br/>United States of America (the)</p>                              | <p>Wright, Belinda<br/>Post-doctoral researcher<br/>University of Sydney<br/>Australia</p>                                                                                                           | <p>Wright, Caroline<br/>Senior lecturer, Genomics<br/>University of Exeter<br/>United Kingdom of Great Britain and Northern Ireland (the)</p>                                      |
| <p>Wright, Christopher<br/>Research Associate<br/>Natural Resources Research Institute - University of Minnesota<br/>United States of America (the)</p>  | <p>Wright, Dawn<br/>Ph.D., Professor of Geography &amp; Oceanography / Chief Scientist<br/>Oregon State University / Environmental Systems Research Institute<br/>United States of America (the)</p> | <p>Wright, Ian<br/>Staff Research Associate, Entomology<br/>UC Riverside<br/>United States of America (the)</p>                                                                    |
| <p>Wright, Mark<br/>Evolutionary Biology<br/>Université de Montpellier<br/>France</p>                                                                    | <p>Wright, Sarah<br/>Animal Science<br/>Cornell University<br/>United States of America (the)</p>                                                                                                    | <p>Wright, Tarah<br/>Professor of Environmental Science<br/>Dalhousie University<br/>Canada</p>                                                                                    |
| <p>Wrzesińska, Dagmara<br/>PhD Research Scholar in Management Science<br/>Louvain School of Management- Université catholique de Louvain<br/>Belgium</p> | <p>Wu, Jian<br/>Professor of Ecological Economics<br/>Renmin University of China<br/>China</p>                                                                                                       | <p>Wu, Jie *<br/>Professor<br/>National University of Singapore<br/>Singapore</p>                                                                                                  |
| <p>Wu, Joanna<br/>United States of America (the)</p>                                                                                                     | <p>Wu, Yu-Wei<br/>Assistant Professor<br/>Graduate Institute of Biomedical Informatics, Taipei Medical University<br/>Taiwan</p>                                                                     | <p>Wubs, Jasper<br/>Postdoctoral Researchers in plant &amp; soil ecology<br/>Netherlands Institute of Ecology (NIOO-KNAW)<br/>Netherlands (the)</p>                                |
| <p>Wueringer, Barbara<br/>Principal Scientist<br/>Sharks And Rays Australia, Honorary Research Fellow<br/>Macquarie University<br/>Australia</p>         | <p>Wulf, Monika<br/>Extraordinary Professor / Vegetation and Landscape Ecology<br/>ZALF, Institute of Land Use Systems<br/>Germany</p>                                                               | <p>Wulff, Angela<br/>Professor in marine ecology<br/>University of Gothenburg<br/>Sweden</p>                                                                                       |

|                                                                                                                                                    |                                                                                                                                      |                                                                                                                                           |
|----------------------------------------------------------------------------------------------------------------------------------------------------|--------------------------------------------------------------------------------------------------------------------------------------|-------------------------------------------------------------------------------------------------------------------------------------------|
| Wulff, Dirk<br>Researcher in cognitive science<br>University of Basel<br>Germany                                                                   | Wulff, Sascha<br>Toxicology<br>Charité - University of Medicine<br>Germany                                                           | Wunsch, Carl<br>Professor of Physical Oceanography and Climate,<br>Emeritus<br>MIT and Harvard U.<br>United States of America (the)       |
| Wurl, Oliver<br>Oceanography<br>Carl-von-Ossietzky University of Oldenburg<br>Germany                                                              | Wurm, Yannick<br>Senior Lecturer<br>Queen Mary University of London<br>United Kingdom of Great Britain and Northern Ireland<br>(the) | Wurtzebach, Zachary<br>Researcher<br>Colorado State University<br>United States of America (the)                                          |
| Wüster, Wolfgang<br>Senior lecturer<br>Bangor University<br>United Kingdom of Great Britain and Northern Ireland<br>(the)                          | Wüthrich, Remo<br>Ecology<br>University Zurich<br>Switzerland                                                                        | Wyckhuys, Kris A.G.<br>Research Entomologist<br>Viet Nam                                                                                  |
| Wyeth, Amy<br>Research Technician<br>Bigelow Laboratory for Ocean Sciences<br>United States of America (the)                                       | WYLER, Nicolas<br>Curator<br>Botanical Garden Geneva<br>Switzerland                                                                  | Wylie, Nathan<br>Biologist<br>United States of America (the)                                                                              |
| Wynne, Brian *<br>Professor (Emeritus) of Science Studies<br>Lancaster University<br>United Kingdom of Great Britain and Northern Ireland<br>(the) | Wyrwoll, PhD, Thomas W.<br>Professor (Archaeology and Zoology)<br>FATAF / ITA, The Physico-Economical Society<br>Germany             | Wyse, Sarah<br>Plant Ecologist<br>Royal Botanic Gardens, Kew<br>United Kingdom of Great Britain and Northern Ireland<br>(the)             |
| Wystrach, Antoine *<br>CNRS<br>France                                                                                                              | Xavier da Silva, Vinícius *<br>Evolution, Zoology and Ecology<br>Universidade Federal de Alfenas (UNIFAL-MG)<br>Brazil               | Xenophontos, Constantinos<br>PhD fellow<br>Germany                                                                                        |
| Xin, Yaqun<br>Germany                                                                                                                              | Xu, John *<br>Biologist<br>New Mexico State University<br>United States of America (the)                                             | Xuereb, André<br>Senior Lecturer in Quantum Physics<br>University of Malta<br>Malta                                                       |
| Yachini, Maya<br>PhD student, education<br>Tel Aviv University<br>Israel                                                                           | Yadav, Arun<br>Professor<br>North-Eastern Hill University<br>India                                                                   | Yadav, Prabhakar<br>PhD Candidate<br>Macquarie University<br>Australia                                                                    |
| Yadav, Romesh<br>Master Student<br>University of Bayreuth<br>Germany                                                                               | Yadok, Biplang<br>PhD Student (Ecology)<br>University of Canterbury, Christchurch, New Zealand<br>New Zealand                        | Yalcin Ozdilek, Sukran<br>Prof. Dr.<br>Canakkale Onsekiz Mart University, Faculty of Science<br>and Arts, Department of Biology<br>Turkey |

|                                                                                                                    |                                                                                                                                                           |                                                                                                                          |
|--------------------------------------------------------------------------------------------------------------------|-----------------------------------------------------------------------------------------------------------------------------------------------------------|--------------------------------------------------------------------------------------------------------------------------|
| Yamada, Sylvia<br>Assistant Professor/ Marine Biology<br>Yamada<br>United States of America (the)                  | Yamashita Ferreira, Renan<br>Infrastructure Analist<br>Departamento Nacional de Infraestrutura de Transportes<br>Brazil                                   | Yan, Norman<br>Senior Research Scholar (Professor Emeritus)<br>York University<br>Canada                                 |
| Yanai, Zohar<br>PhD candidate<br>School of Zoology, Tel Aviv University<br>Israel                                  | Yáñez, Benjamín<br>Ecology of marine benthic communityes<br>Instituto de Ciencias del Mar y Limnología, Universidad Nacional Autónoma de México<br>Mexico | Yáñez, Pablo *<br>Sustainability Coordinator<br>University of Talca<br>Chile                                             |
| Yáñez-Mó, María<br>Ramón y Cajal Researcher, Molecular Biology Department<br>UAM<br>Spain                          | Yañez-Serrano, Ana Maria<br>Postdoctoral researcher<br>University of Freiburg<br>Germany                                                                  | Yang, Jenny<br>Assistant Professor of Chemistry<br>University of California Irvine<br>United States of America (the)     |
| Yang, Mary M<br>Geochemistry PhD<br>Princeton University<br>United States of America (the)                         | Yang, Mayfair<br>Professor/Anthropology<br>University of California, Santa Barbara<br>United States of America (the)                                      | Yang, Mingxi<br>Scientist<br>United Kingdom of Great Britain and Northern Ireland (the)                                  |
| Yang Amri, Affendi<br>Coral Reef Ecologist<br>IOES, University of Malaya<br>Malaysia                               | Yannelli, Florencia A<br>Posdoctoral fellow<br>Centre for Invasion Biology, Stellenbosch University<br>South Africa                                       | Yap, Emilia<br>Austria                                                                                                   |
| Yardeni, Gil<br>PhD, Plant Molecular Ecology & Evolutionary Genomics<br>University of Vienna<br>Austria            | Yasobant, Sandul<br>Junior Researcher<br>Center for Development Research (ZEF), University of Bonn<br>Germany                                             | Yau, Yuan-Yeu<br>Plant Breeding and Plant Genetics<br>PhD from UW-Madison<br>United States of America (the)              |
| YAZLIK, Ayşe<br>Düzce University Faculty of Agriculture and Natural Sciences Plant Protection Department<br>Turkey | Yazmaciyan, Aren<br>PhD Candidate / Physics<br>University of Queensland<br>Australia                                                                      | Ybema, Sierk<br>Prof<br>VU/ Anglia Ruskin<br>Netherlands (the)                                                           |
| Ye, Hao<br>Postdoctoral Fellow<br>Scripps Institution of Oceanography<br>United States of America (the)            | Yea Dat, Chuah *<br>Senior Lecturer<br>Universiti Tunku Abdul Rahman<br>Malaysia                                                                          | Yebrá, Lidia<br>Tenured Researcher, Zooplankton Ecology<br>Instituto Español de Oceanografía<br>Spain                    |
| Yee, Marie<br>Conservation Planner (Forest)<br>University of Tasmania (Honorary Research Associate)<br>Australia   | Yela, José Luis<br>Associate Professor of Zoology and Conservation Biology<br>University of Castilla-La Mancha<br>Spain                                   | Yerena, Edgard<br>Environmental Management and Policy<br>Universidad Simon Bolivar<br>Venezuela (Bolivarian Republic of) |

|                                                                                                                                               |                                                                                                                                                     |                                                                                                                                  |
|-----------------------------------------------------------------------------------------------------------------------------------------------|-----------------------------------------------------------------------------------------------------------------------------------------------------|----------------------------------------------------------------------------------------------------------------------------------|
| Yesilaltay, Sacha<br>MD student in cognitive sciences<br>Ecole Normale Supérieure<br>France                                                   | Yeste, Antonio<br>Ecology<br>University of Granada<br>Spain                                                                                         | Yetman, Caroline<br>Senior Scientist and Doctor in Zoology<br>Natural Scientific Services<br>South Africa                        |
| Yeung, Alex Chee Yu<br>PhD candidate, Forest and Conservation Sciences<br>University of British Columbia<br>Canada                            | Yguel, Benjamin<br>Postdoc researcher in ecology<br>MNHN<br>France                                                                                  | Yin, Zi-Wei<br>Associate Research Scientist<br>Shanghai Normal University<br>China                                               |
| Ying, Qing<br>Ph.D student<br>UMD<br>China                                                                                                    | Yingst, Alexandra<br>Master's Student<br>University Centre of the Westfjords<br>United States of America (the)                                      | Yletyinen, Johanna<br>New Zealand                                                                                                |
| Ylipulli, Johanna<br>Postdoctoral Researcher<br>University of Oulu<br>Finland                                                                 | Yniguez, Aletta<br>Assistant Professor<br>Marine Science Institute, University of the Philippines<br>Diliman<br>Philippines (the)                   | Yoccoz, Nigel<br>Professor, Ecology<br>Arctic University of Norway<br>Norway                                                     |
| Yoder, Jeremy<br>Assistant Professor, Biology<br>California State University, Northridge<br>United States of America (the)                    | Yohe, Gary<br>Huffingtonton Foundation Professor of Economics and<br>Environmental Studies<br>Wesleyan University<br>United States of America (the) | Yokochi, Kaori<br>Conservation Biology<br>Deakin University<br>Australia                                                         |
| Yokota, Leandro<br>Post-Doc<br>Universidade de São Paulo (USP)<br>Brazil                                                                      | Yonow, Nathalie<br>Research and Teaching Assistant<br>Swansea University<br>United Kingdom of Great Britain and Northern Ireland<br>(the)           | Yonow, Tania<br>Research Scientist<br>CSIRO<br>Australia                                                                         |
| Yoon, Su'ad<br>Graduate Student, Ecology<br>University of Nevada Reno<br>United States of America (the)                                       | Yoong, FeiYian<br>Lecturer<br>Maastricht University<br>Netherlands (the)                                                                            | York, Paul<br>Senior Research Scientist<br>James Cook University<br>Australia                                                    |
| Youlatos, Dionisios<br>Associate professor<br>Aristotle University of Thessaloniki, School of Biology<br>Greece                               | Young, Audrey<br>Registered Nurse<br>United States of America (the)                                                                                 | Young, Einir<br>Director of Sustainability<br>Bangor University<br>United Kingdom of Great Britain and Northern Ireland<br>(the) |
| Young, Fiona<br>Natural Scientist / plant taxonomist<br>Bioscience Holistics<br>United Kingdom of Great Britain and Northern Ireland<br>(the) | Young, Glyn<br>Head of Bird Department<br>Durrell Wildlife Conservation Trust<br>Jersey                                                             | Young, Helen<br>Professor of Biology<br>Middlebury College<br>United States of America (the)                                     |

|                                                                                                                                                        |                                                                                                                                                    |                                                                                                                                                       |
|--------------------------------------------------------------------------------------------------------------------------------------------------------|----------------------------------------------------------------------------------------------------------------------------------------------------|-------------------------------------------------------------------------------------------------------------------------------------------------------|
| Young, Hillary<br>Professor<br>University California Santa Barbara<br>United States of America (the)                                                   | Young, Jessica<br>Global Coordinator, Master in Environmental<br>Management<br>Western State Colorado University<br>United States of America (the) | Young, Joanna<br>MS Geophysics, PhD Candidate Geophysics<br>University of Alaska Fairbanks<br>United States of America (the)                          |
| Young, Jordann<br>Marine Ecology<br>The University of Texas<br>United States of America (the)                                                          | Young, Kenneth<br>Professor, Department of Geography & the Environment<br>University of Texas at Austin<br>United States of America (the)          | Young, Kyle<br>Ecology<br>University of Zurich<br>Switzerland                                                                                         |
| Young, Mary<br>Postdoctoral Researcher<br>Deakin University<br>Australia                                                                               | Young, Rebecca<br>postdoctoral fellow, physiological ecology<br>Universidad Nacional Autónoma de México<br>Mexico                                  | Young, Renee<br>Manager Centre for mIne Site Restoration<br>Curtin University<br>Australia                                                            |
| Young, Richard<br>Head of Conservation Science<br>Durrell Wildlife Conservation Trust<br>United Kingdom of Great Britain and Northern Ireland<br>(the) | Young, Ruth<br>retired chemistry & biology teacher<br>Corning-Painted Post School District<br>United States of America (the)                       | Young, Samantha<br>Research Coordinator in Community Engagement<br>San Diego Zoo Global<br>United States of America (the)                             |
| Young, Suzanne<br>PhD Candidate, Biology<br>University of South Florida<br>United States of America (the)                                              | Youngflesh, Casey<br>PhD Candidate - Ecology and Evolution<br>Stony Brook Univeristy<br>United States of America (the)                             | Younginger, Brett<br>Doctoral Candidate<br>Portland State University<br>United States of America (the)                                                |
| Younus, Dr Faisal<br>Researcher<br>The Australian National University and CSIRO<br>Australia                                                           | yousefi, neda<br>phd student<br>Macquarie University<br>Australia                                                                                  | Yovel, Yossi<br>Zoologist<br>Tel-Aviv University<br>Israel                                                                                            |
| Yu, Kang<br>Postdoc / Division of Forest, Nature and Landscape<br>KU Leuven<br>Belgium                                                                 | Yu, Zicheng<br>Professor in Earth and Environmental Sciences<br>Lehigh University<br>United States of America (the)                                | Yufanyi, Divine Mbom<br>Alexander von Humboldt Postdoctoral Fellow<br>Institute of Inorganic Chemistry, University of Leipzig,<br>Germany<br>Cameroon |
| Yule, Catherine<br>Professor of Tropical Ecology<br>Monash University<br>Malaysia                                                                      | Yunes Quartino, Pablo<br>Chemistry<br>Universidad Nacional de Córdoba<br>Argentina                                                                 | Yusti, Ana Paola<br>Biologist<br>Universidad de Chile<br>Colombia                                                                                     |
| Yusty, María Julia<br>Yusty<br>Spain                                                                                                                   | Zacaï, Axelle<br>PhD in Paleontology/Macroecology<br>Université de Bourgogne<br>France                                                             | Zacher, Katharina<br>Scientist/Biologist<br>Alfred-Wegener-Institute Helmholtz-Centre for Polar and<br>Marine Research<br>Germany                     |

|                                                                                                                                                               |                                                                                                                                            |                                                                                                                         |
|---------------------------------------------------------------------------------------------------------------------------------------------------------------|--------------------------------------------------------------------------------------------------------------------------------------------|-------------------------------------------------------------------------------------------------------------------------|
| Záchia, Renato<br>Associate Professor of Systematic Botany<br>Universidade Federal de Santa Maria/Rio Grande do Sul<br>Brazil                                 | Zachmann, Gabriel<br>Professor in Computer Science<br>University of Bremen<br>Germany                                                      | Zackary, Drew<br>PhD Anthropology<br>CU Boulder<br>United States of America (the)                                       |
| Zago da Silva, Luciana<br>Professor/ Zoology and Ecology<br>Faculdade Guairacá<br>Brazil                                                                      | Zaguri, Moshe<br>Ecology, Evolution and behavior department<br>The Hebrew University of Jerusalem<br>Israel                                | Zahawi, Rakan A.<br>Associate Researcher<br>University of California - Santa Cruz<br>United States of America (the)     |
| Zahid, Simra<br>researcher<br>SBU<br>United States of America (the)                                                                                           | Zaiko, Anastasija<br>Marine Scientist<br>New Zealand                                                                                       | Zaini, Nurul Hazlina<br>Research Assistant<br>Universiti Brunei Darussalam<br>Brunei Darussalam                         |
| Zajitschek, Felix<br>Postdoctoral Research Fellow, Evolutionary Ecology<br>Monash University<br>Australia                                                     | Zajitschek, Susanne<br>Research Fellow<br>EBD-CSIC<br>Spain                                                                                | Zajková, Zuzana<br>University of Barcelona<br>Spain                                                                     |
| Zajonz, Uwe<br>Researcher, Marine Biology and Ecosystem Services<br>Senckenberg Biodiversity and Climate Research Institute,<br>Frankfurt a.M.<br>Germany     | Zak, Alison<br>United States of America (the)                                                                                              | Zakharova, Liubov<br>PhD Student, Ecology<br>University of Goettingen<br>Germany                                        |
| Zala, Sarah<br>Senior scientist / Biology<br>Konrad Lorenz Institute of Ethology<br>Austria                                                                   | Zalasiewicz, Jan<br>Professor of Palaeobiology<br>University of Leicester<br>United Kingdom of Great Britain and Northern Ireland<br>(the) | Zalewski, Andrzej<br>Associate Professor<br>Mammal Research Institute Polish Academy of Sciences<br>Poland              |
| Zaman, Anis<br>Director<br>Climatech International<br>Australia                                                                                               | Zaman, Sumaira<br>Graduate Student<br>University of Connecticut<br>United States of America (the)                                          | Zamani, Navid *<br>University lecturer<br>Behbahan khatamalanbia university of technology<br>Iran (Islamic Republic of) |
| zamani, neviaty<br>Head of Marine Science Postgraduate Study programme<br>/marine science and coastal management<br>Bogor Agriculture university<br>Indonesia | Zamani, Wahid<br>Iran (Islamic Republic of)                                                                                                | Zambelli, Nicola<br>Zoology curator<br>Natural History Museum of Canton Ticino<br>Switzerland                           |
| Zamborain-Mason, Jessica<br>PhD candidate<br>James Cook University<br>Spain                                                                                   | Zamborlini Saiter, Felipe<br>Professor of Botany<br>Instituto Federal do Espírito Santo<br>Brazil                                          | Zamora Muñoz, Carmen<br>Associate professor, Zoology<br>University of Granada<br>Spain                                  |

|                                                                                                                                          |                                                                                                                      |                                                                                                                                           |
|------------------------------------------------------------------------------------------------------------------------------------------|----------------------------------------------------------------------------------------------------------------------|-------------------------------------------------------------------------------------------------------------------------------------------|
| Zamora-Garcia, Oscar Guillermo<br>Population Dynamics and fisheries<br>Universidad Nacional Autónoma de México<br>Mexico                 | Zamorano Antunes, Alexander<br>Ornithologist and Scientific researcher<br>Instituto Florestal de São Paulo<br>Brazil | Zampieri, Dario<br>Associate professor<br>University of Padova, Department of Geosciences<br>Italy                                        |
| Zamzow, Daniel<br>Assistant Professor<br>UW Rock County<br>United States of America (the)                                                | Zander, Richard<br>Research Scientist<br>Missouri Botanical Garden<br>United States of America (the)                 | Zandigiacomo, Pietro<br>Associate professor / Entomology<br>University of Udine<br>Italy                                                  |
| Zandona, Eugenia<br>Assistant Professor<br>Universidade do Estado do Rio de Janeiro<br>Brazil                                            | Zandonadi, Daniel<br>Professor/Plant Physiology<br>UFRJ<br>Brazil                                                    | Zanella, Lisiane<br>Professora EBBT - Biologia<br>Instituto Federal do Rio Grande do SUL - IFRS<br>Brazil                                 |
| Zango, Germán<br>Postdoctoral Research Associate in Chemistry<br>Autonoma University of Madrid<br>Spain                                  | Zannoni, Nora<br>Germany                                                                                             | Zanotti, Laura<br>Associate Professor<br>Purdue University<br>United States of America (the)                                              |
| Zapata, Fernando<br>Professor, Marine Ecology<br>Universidad del Valle<br>Colombia                                                       | Zappile, Paul<br>Scientist<br>United States of America (the)                                                         | Zarco-Perello, Salvador<br>PhD Candidate in Marine Biology<br>University of Western Australia<br>Australia                                |
| Zardeneta, Gustavo<br>Professor of Biochemistry<br>Wayne State College<br>United States of America (the)                                 | Zark, Maren<br>Marine Geochemistry<br>University of Oldenburg<br>Germany                                             | Zárrate-Charry, Diego A<br>Research Coordinator<br>Proyecto de Conservación de Aguas y Tierras<br>Colombia                                |
| Zarza, Rebecca<br>Birds Ecology, Independent consultant<br>Paraguay                                                                      | Zarzoso-Lacoste, Diane<br>Postdoctoral position<br>Université Paris Sud<br>France                                    | Zasada, Ingo<br>Agricultural Science and Geography<br>Leibniz Centre for Agricultural Landscape Research (ZALF)<br>Germany                |
| Zaú, André S.<br>Professor of Ecology and Conservation<br>Federal University of the State of Rio de Janeiro<br>Brazil                    | Zavala, Miguel A.<br>Head of Forest Ecology & Restoration Group<br>Universidad de Alcalá<br>Spain                    | Zavalaga, Carlos<br>Marine Biology<br>Universidad Científica del Sur<br>Peru                                                              |
| Zavaleta, Erika<br>Professor, Ecology and Evolutionary Biology<br>University of California, Santa Cruz<br>United States of America (the) | Zaviezo, Tania<br>Professor Ecology/Entomology<br>Pontificia Universidad Catolica de Chile<br>Chile                  | Zawierucha, Krzysztof<br>PhD, ecology and taxonomy of invertebrates<br>Faculty of Biology, Adam Mickiewicz University in Poznań<br>Poland |

|                                                                                                                                                                 |                                                                                                                                          |                                                                                                                                      |
|-----------------------------------------------------------------------------------------------------------------------------------------------------------------|------------------------------------------------------------------------------------------------------------------------------------------|--------------------------------------------------------------------------------------------------------------------------------------|
| Zazanashvili, Nugzar<br>Assoc. Professor<br>Ilia State University, Institute of Ecology<br>Georgia                                                              | Zboralski, Antoine<br>Microbiology<br>Université de Moncton, Canada<br>Canada                                                            | Zea, Sven<br>Professor<br>Universidad Nacional de Colombia<br>Colombia                                                               |
| Zeale, Matthew<br>Postdoctoral Research Associate in Biological Sciences<br>University of Bristol<br>United Kingdom of Great Britain and Northern Ireland (the) | Zech, Ben<br>Ecologist (retired environmental diplomat)<br>Free lance consultant<br>Netherlands (the)                                    | Zedler, Joy<br>Aldo Leopold Professor Emerita<br>University of Wisconsin-Madison<br>United States of America (the)                   |
| Zedler, Paul<br>Professor of Environmental Studies<br>University of Wisconsin - Madison<br>United States Minor Outlying Islands (the)                           | Zefferman, Emily<br>Ecologist<br>United States of America (the)                                                                          | ZEHZAD, BAHRAM<br>ADVISOR<br>DEPARTMENT OF ENVIRONMENT<br>Iran (Islamic Republic of)                                                 |
| Zehzad, Payam<br>Lepidopterologist<br>Iran (Islamic Republic of)                                                                                                | Zeilinger, Susanne<br>University Professor of Microbiology<br>University of Innsbruck<br>Austria                                         | Zelenika, Ivana<br>PhD Candidate in Resource Management and Sustainability<br>University of British Columbia<br>Canada               |
| Zelenika, Sasa<br>Professor of Mechanical Engineering<br>University of Rijeka - Faculty of Engineering<br>Croatia                                               | Zelikova, Jane<br>Research Scientist/Ecologist<br>University of Wyoming<br>United States of America (the)                                | Zeller, Georg<br>Team Leader in Bioinformatics<br>European Molecular Biology Laboratory, Heidelberg<br>Germany                       |
| Zelt, Jessica<br>United States of America (the)                                                                                                                 | Zeman, Tomáš<br>graduate student, Mathematics<br>University of Oxford<br>United Kingdom of Great Britain and Northern Ireland (the)      | Zemp, Delphine Clara<br>Postdoctoral researcher<br>University of Goettingen - Biodiversity, Macroecology and Biogeography<br>Germany |
| Zenker, Mauricio<br>postdoctoral researcher<br>Museum Koenig<br>Germany                                                                                         | Zenon, Eric<br>Researcher<br>Centro del Cambio Global y la Sustentabilidad en el Sureste A.C.<br>Mexico                                  | Zepeda, Paulo<br>Research Assistant Evolutionary Biology<br>Pontificia Universidad Católica de Chile<br>Chile                        |
| Zeppelini, Douglas<br>Full Professor Zoology<br>Universidade Estadual da Paraíba<br>Brazil                                                                      | Zeri, Marcelo<br>Researcher/Agrometeorology<br>Cemaden (National Center for Monitoring and Early Warning of Natural Disasters)<br>Brazil | Zettel, Herbert<br>Entomologist<br>Natural History Museum Vienna<br>Austria                                                          |



|                                                                                                                          |                                                                                                                              |                                                                                                                                                              |
|--------------------------------------------------------------------------------------------------------------------------|------------------------------------------------------------------------------------------------------------------------------|--------------------------------------------------------------------------------------------------------------------------------------------------------------|
| Zettler, Erik<br>Visiting Scientist<br>NIOZ Royal Netherlands Institute for Sea Research<br>Netherlands (the)            | Zeuschner, Janek<br>PhD student<br>Max-Planck-Institute for Chemistry<br>Germany                                             | Zevit, Pamela<br>Registered Professional Biologist/Principle<br>Adamah Consultants<br>Canada                                                                 |
| Zhai, Dayou<br>Yunnan University<br>China                                                                                | Zhang, Guicheng<br>Associate Professor in School of Public Health<br>Curtin University<br>Australia                          | Zhang, Jiafu<br>Professor, Quaternary Chronology, Environments and<br>Surface Processes<br>Peking University, Department of Geography<br>China               |
| Zhang, Qing *<br>Ecology<br>TU Berlin<br>Germany                                                                         | Zhang, Xuehua<br>Professor of Environmental Policy<br>Sichuan University<br>China                                            | Zhang, Zhijie<br>phd student<br>University of Konstanz<br>China                                                                                              |
| Zhygalova, Svitlana<br>Botany<br>M.G.Kholodny Institute of Botany NAS of Ukraine<br>Ukraine                              | Ziak, Matej<br>entomologist<br>Slovak National Museum<br>Slovakia                                                            | Ziccardi, Leonardo<br>Masters Student<br>National Institute for Research in Amazonia (INPA)<br>Brazil                                                        |
| Ziegler, Amber<br>Anthropology/climate change adaptation<br>United States of America (the)                               | Zielenkiewicz, Urszula<br>PhD in biology<br>Institute of Biochemistry and Biophysics Polish Academy<br>of Sciences<br>Poland | Zietsma, Charlene<br>Associate Professor, Management & Organization, Smeal<br>College of Business<br>Penn State University<br>United States of America (the) |
| Ziliak, Ellen<br>Associate Professor of Mathematics<br>Benedictine University<br>United States of America (the)          | ZILLER, SILVIA<br>Forester<br>The Horus Institute for Environmental Conservation and<br>Development<br>Brazil                | Zim, Nomakula<br>Microbiology honours student, MSc candidate<br>University of Pretoria<br>South Africa                                                       |
| Zimbres, Barbara<br>Universidade de Brasilia<br>Brazil                                                                   | Zimmer, Stephan<br>Post-Doc<br>Department of Physics, University of Geneva<br>Switzerland                                    | Zimmerman, Amy<br>Assistant Professor of Biology<br>Roosevelt University<br>United States of America (the)                                                   |
| Zimmerman, Rachel<br>Marine biologist<br>Nova Southeastern University<br>United States of America (the)                  | Zimmermann, Dominique<br>Curator Hymenoptera<br>Natural History Museum Vienna<br>Austria                                     | Zimmermann, Helmuth<br>Biological Control of Invasive Alien Plants<br>South African National Biodiversity Institute (SANBI)<br>South Africa                  |
| Zimmermann, Maura<br>PhD student-Plant biology<br>University of Massachusetts, Amherst<br>United States of America (the) | Zimmermann, Niklaus E.<br>Biology<br>Swiss Federal Research Institute WSL<br>Switzerland                                     | Zingale, Jonathan<br>Computer Programmer<br>Santa Fe Institute<br>United States of America (the)                                                             |

|                                                                                                                                       |                                                                                                                                      |                                                                                                                                                                           |
|---------------------------------------------------------------------------------------------------------------------------------------|--------------------------------------------------------------------------------------------------------------------------------------|---------------------------------------------------------------------------------------------------------------------------------------------------------------------------|
| Zinke, Jens<br>Senior Researcher and Lecturer<br>Freie Universität Berlin<br>Germany                                                  | Zinszner, Helene<br>Biology<br>St John's U<br>United States of America (the)                                                         | Zint, Natasha<br>Bachelor of Sciences (Psychology Double Major) Graduate<br>The University of Western Australia<br>Australia                                              |
| Ziolkowski, Lori<br>Assistant Professor / Isotope Biogeochemistry<br>University of South Carolina<br>United States of America (the)   | Zirk, Estrella<br>wildlife ecologist<br>University of Natural Resources and Life Sciences, Vienna<br>Austria                         | Zissu, Boaz<br>Professor, Department of Land of Israel and Archaeology<br>Bar-Ilan University<br>Israel                                                                   |
| Ziter, Carly<br>PhD Candidate, Department of Integrative Biology<br>University of Wisconsin Madison<br>United States of America (the) | Zito, Sarah<br>Scientific Officer<br>New Zealand                                                                                     | Zittier, ZOora<br>Research Assistant<br>Akfred Wegener Institut<br>Germany                                                                                                |
| Zlatarski, Vassil<br>D.Sc. (Biology), Ph.D. (Geology)<br>Independent Researcher<br>Bulgaria                                           | Zlatkov, Boyan<br>curator, entomologist<br>Sofia University St. Kliment Ohridski<br>Bulgaria                                         | Zoccarato, Luca<br>Postdoc, Microbial Ecologist<br>Leibniz Institute of Freshwater Ecology and Inland<br>Fisheries (IGB) Germany<br>Germany                               |
| Zoldan, Paulo<br>Economist<br>Secretaria de Estado da Fazenda<br>Brazil                                                               | Zolotarev, Dmitry<br>Environmental Economics/Scientometrics<br>State Research Sociological Center<br>Russian Federation (the)        | Zonneveld, Karin<br>Senior Scientist, Marine<br>Palynology/palaeoceanography/palaeoclimatology<br>MARM/Fachbereich 5-Geowissenschaften University of<br>Bremen<br>Germany |
| Zorn, Paul<br>Professor of Mathematics<br>St Olaf College<br>United States of America (the)                                           | Zotz, Gerhard<br>Ecologist<br>University of Oldenburg<br>Germany                                                                     | Zourellis, Andreas<br>Energy Engineer<br>Greece                                                                                                                           |
| Zscheischler, Jakob<br>Postdoc<br>ETH Zurich<br>Switzerland                                                                           | Zuanon, Jansen<br>Researcher, Freshwater Fish Ecology<br>Brazilian National Institute for Research of the Amazon<br>(INPA)<br>Brazil | Zub, Karol<br>biologist<br>Mammal Research Institute Polish Academy of Sciences<br>Poland                                                                                 |
| Zuberi, MI<br>Professor, Environmental Science<br>Gono University<br>Bangladesh                                                       | Zuccarini, Paolo<br>Technician<br>Creaf<br>Spain                                                                                     | Zugaro, Michaël<br>Directeur de Recherche<br>CNRS<br>France                                                                                                               |

|                                                                                                                                                                     |                                                                                                                                    |                                                                                                                                 |
|---------------------------------------------------------------------------------------------------------------------------------------------------------------------|------------------------------------------------------------------------------------------------------------------------------------|---------------------------------------------------------------------------------------------------------------------------------|
| Zuidema, Pieter<br>Professor in Tropical Forest Ecology<br>Wageningen University<br>Netherlands (the)                                                               | Zukanovich Funchal, Renata<br>Professor of Physics<br>Universidade de Sao Paulo<br>Brazil                                          | Zukosky, Michael<br>Professor<br>Eastern Washington University<br>United States of America (the)                                |
| Zuloaga, Juan<br>PhD candidate / Director<br>University of Ottawa / www.ecodiversatropical.com<br>Canada                                                            | Zuloaga-Aguilar, Susana<br>Profesora-investigadora, Ecología fisiológica Vegetal<br>Universidad de Guadalajara<br>Mexico           | Zúñiga, Luis<br>Freshwater Ecologist.<br>Retired<br>Chile                                                                       |
| Zúñiga Ríos, Adán<br>Phd Student<br>Biogeochemical Laboratory, Institute of Marine and<br>limnology Sciences. National Autonomous University of<br>Mexico<br>Mexico | Zuniga-Vega, Jose Jaime<br>Full Professor of Biology<br>Facultad de Ciencias, Universidad Nacional Autonoma de<br>Mexico<br>Mexico | Zuquim, Gabriela<br>Postdoctoral researcher - Tropical ecology<br>University of Turku, Finland, Department of Biology<br>Brazil |
| Żurek, Roman<br>hydrobiologist, prof.<br>Institute of Nature Cinservation, Polish Acad. Sci.<br>Poland                                                              | Zwick, Andreas<br>Molecular systematist (Entomology)<br>CSIRO<br>Australia                                                         | Zwick, Michael<br>Assoc Prof<br>Scripps Research Institute<br>United States of America (the)                                    |
| Zwicker, William S<br>Professor of Mathematics<br>Union College<br>United States of America (the)                                                                   | Zwolicki, Adrian<br>Adjunct, Vertebrate Ecology<br>University of Gdańsk, Department of vertebrate ecology<br>and zoology<br>Poland | Zych, Marcin<br>Associate Professor / Evolutionary Biology<br>Faculty of Biology, University of Warsaw<br>Poland                |
| Zylstra, Matthew<br>Director / Facilitator<br>Organisation for Noetic Ecology<br>South Africa                                                                       |                                                                                                                                    |                                                                                                                                 |
